# Supplementary material for: Effects of friction models on simulation of pneumatic cylinder
Source: Copernicus journal article supplement (doi:10.5194/ms-10-517-2019), 2019-10-30
Supplement: Supplementary file 1 [file Figure 7.xls]

## Sheet: output
tt	x	p1c	p2c	Fr1	u1	u2	v	vc	a	ac	Frs
0	0.0348537	0.00055	0.00055	1.16145	2.875	2.1875	0	0.000306368	0	0.00426851	0.05	5e-05	0.00554906
0.00116	0.0348537	0.00055	0.00055	1.14854	2.875	2.1875	-2.77815	0.000164129	-0.12262	0.00450929	0.05	5e-05	0.00586208
0.00232	0.0348537	0.00055	0.00055	1.13513	2.875	2.1875	2.52559	0.00139684	1.06268	0.00481299	0.05	5e-05	0.00625688
0.00348	0.0348537	0.00055	0.00055	1.1216	2.875	2.1875	0	0.00138036	-0.0142052	0.00459315	0.05	5e-05	0.0059711
0.00464	0.0348537	0.00055	0.00055	1.10821	2.875	2.1875	0	0.00136457	-0.0136172	0.00438262	0.05	5e-05	0.00569741
0.0058	0.0348537	0.00055	0.00055	1.09498	2.875	2.1875	0	0.00134945	-0.0130345	0.004181	0.05	5e-05	0.00543531
0.00696	0.0348537	0.00055	0.00055	1.08174	2.875	2.1875	0	0.001335	-0.0124586	0.0039879	0.05	5e-05	0.00518427
0.00812	0.0348537	0.00055	0.00055	1.06827	2.875	2.1875	0	0.00132121	-0.0118897	0.00380294	0.05	5e-05	0.00494382
0.00928	0.0348537	0.00055	0.00055	1.05464	2.875	2.1875	-1.38908	0.00130807	-0.0113259	0.00362575	0.05	5e-05	0.00471347
0.01044	0.0348537	0.00055	0.00055	1.04032	2.875	2.1875	1.38908	0.00198301	0.58185	0.00345595	0.05	5e-05	0.00449273
0.0116	0.0348537	0.00055	0.00055	1.02643	2.875	2.1875	0.12628	0.0019715	-0.00992155	0.00299991	0.05	5e-05	0.00389989
0.01276	0.0348537	0.00055	0.00055	1.01294	2.875	2.1875	-0.378839	0.00189848	-0.0629543	0.00255027	0.05	5e-05	0.00331535
0.01392	0.0348537	0.00055	0.00055	0.999528	2.875	2.1875	0.252559	0.00201387	0.0994776	0.00213305	0.05	5e-05	0.00277296
0.01508	0.0348537	0.00055	0.00055	0.985833	2.875	2.1875	-0.505119	0.00200527	-0.00741121	0.00166765	0.05	5e-05	0.00216794
0.01624	0.0348537	0.00055	0.00055	0.971827	2.875	2.1875	0.631398	0.00224765	0.208941	0.00120674	0.05	5e-05	0.00156876
0.0174	0.0348537	0.00055	0.00055	0.95765	2.875	2.1875	0	0.00217866	-0.0594716	0.00064303	0.05	5e-05	0.000835939
0.01856	0.0348537	0.00055	0.00055	0.943528	2.875	2.1875	-0.252559	0.00211075	-0.0585414	0.000109069	0.05	5e-05	0.000141789
0.01972	0.0348537	0.00055	0.00055	0.929761	2.875	2.1875	0.252559	0.00216888	0.0501069	-0.000395867	0.05	5e-05	-0.000514628
0.02088	0.0348537	0.00055	0.00055	0.916729	2.875	2.1875	0	0.00210308	-0.0567155	-0.000925796	0.05	5e-05	-0.00120354
0.02204	0.0348537	0.00055	0.00055	0.905485	2.875	2.1875	0.12628	0.00203834	-0.055819	-0.00142812	0.05	5e-05	-0.00185655
0.0232	0.0348537	0.00055	0.00055	0.894062	2.875	2.1875	-0.12628	0.0019121	-0.108823	-0.00190352	0.05	5e-05	-0.00247457
0.02436	0.0348537	0.00055	0.00055	0.882453	2.875	2.1875	-0.12628	0.00184931	-0.0541336	-0.00232601	0.05	5e-05	-0.00302381
0.02552	0.0348537	0.00055	0.00055	0.870642	2.875	2.1875	0	0.00184992	0.000530172	-0.00272286	0.05	5e-05	-0.00353971
0.02668	0.0348537	0.00055	0.00055	0.859103	2.875	2.1875	-0.12628	0.00185145	0.00131897	-0.00312132	0.05	5e-05	-0.00405771
0.02784	0.0348537	0.00055	0.00055	0.848288	2.875	2.1875	-0.505119	0.00191639	0.0559836	-0.00352197	0.05	5e-05	-0.00457857
0.029	0.0348537	0.00055	0.00055	0.837586	2.875	2.1875	0.883957	0.00223226	0.272297	-0.00395208	0.05	5e-05	-0.0051377
0.03016	0.0348537	0.00055	0.00055	0.826499	2.875	2.1875	-0.378839	0.00211177	-0.103869	-0.0045189	0.05	5e-05	-0.00587457
0.03132	0.0348537	0.00055	0.00055	0.815044	2.875	2.1875	0.631398	0.00217981	0.0586534	-0.00503655	0.05	5e-05	-0.00654751
0.03248	0.0348537	0.00055	0.00055	0.803484	2.875	2.1875	1.13652	0.00193645	-0.209787	-0.00558572	0.05	5e-05	-0.00726144
0.03364	0.0348537	0.00055	0.00055	0.793129	2.875	2.1875	-0.631398	0.00113161	-0.69383	-0.00603383	0.05	5e-05	-0.00784398
0.0348	0.0348537	0.00055	0.00055	0.783417	2.875	2.1875	-1.51536	0.000639798	-0.423976	-0.00614157	0.05	5e-05	-0.00798404
0.03596	0.0348537	0.00055	0.00055	0.773935	2.875	2.1875	0.505119	0.000898233	0.222789	-0.00604252	0.05	5e-05	-0.00785527
0.03712	0.0348537	0.00055	0.00055	0.76406	2.875	2.1875	0	0.000907136	0.007675	-0.00605671	0.05	5e-05	-0.00787373
0.03828	0.0348537	0.00055	0.00055	0.753786	2.875	2.1875	0	0.000916488	0.00806207	-0.00607771	0.05	5e-05	-0.00790102
0.03944	0.0348537	0.00055	0.00055	0.743152	2.875	2.1875	0	0.000926293	0.00845259	-0.0061057	0.05	5e-05	-0.0079374
0.0406	0.0348537	0.00055	0.00055	0.732875	2.875	2.1875	-0.631398	0.000936557	0.00884828	-0.00614089	0.05	5e-05	-0.00798316
0.04176	0.0348537	0.00055	0.00055	0.72314	2.875	2.1875	1.64164	0.00125976	0.278619	-0.0061835	0.05	5e-05	-0.00803855
0.04292	0.0348537	0.00055	0.00055	0.7138	2.875	2.1875	-1.2628	0.000771152	-0.421209	-0.00636706	0.05	5e-05	-0.00827718
0.04408	0.0348537	0.00055	0.00055	0.703712	2.875	2.1875	-0.378839	0.000907873	0.117863	-0.00634532	0.05	5e-05	-0.00824891
0.04524	0.0348537	0.00055	0.00055	0.693196	2.875	2.1875	0.883957	0.00123253	0.279873	-0.00638505	0.05	5e-05	-0.00830056
0.0464	0.0348537	0.00055	0.00055	0.682069	2.875	2.1875	-0.252559	0.00112033	-0.0967216	-0.00656644	0.05	5e-05	-0.00853637
0.04756	0.0348537	0.00055	0.00055	0.67105	2.875	2.1875	-0.757678	0.00113367	0.0115052	-0.00670321	0.05	5e-05	-0.00871418
0.04872	0.0348537	0.00055	0.00055	0.66059	2.875	2.1875	0.757678	0.00152255	0.335234	-0.006849	0.05	5e-05	-0.0089037
0.04988	0.0348537	0.00055	0.00055	0.650175	2.875	2.1875	-1.13652	0.00153721	0.0126388	-0.00716408	0.05	5e-05	-0.0093133
0.05104	0.0348537	0.00055	0.00055	0.6393	2.875	2.1875	1.13652	0.00211508	0.498163	-0.00748896	0.05	5e-05	-0.00973565
0.0522	0.0348537	0.00055	0.00055	0.628114	2.875	2.1875	0.252559	0.00213154	0.0141966	-0.00806408	0.05	5e-05	-0.0104833
0.05336	0.0348537	0.00055	0.00055	0.616433	2.875	2.1875	0	0.00202408	-0.0926431	-0.00865022	0.05	5e-05	-0.0112453
0.05452	0.0348537	0.00055	0.00055	0.604803	2.875	2.1875	-0.12628	0.00191762	-0.0917784	-0.00919479	0.05	5e-05	-0.0119532
0.05568	0.0348537	0.00055	0.00055	0.593576	2.875	2.1875	-0.252559	0.00187459	-0.0370871	-0.00969849	0.05	5e-05	-0.012608
0.05684	0.0348537	0.00055	0.00055	0.582484	2.875	2.1875	0.252559	0.00195749	0.0714612	-0.0101886	0.05	5e-05	-0.0132452
0.058	0.0348537	0.00055	0.00055	0.57164	2.875	2.1875	-0.12628	0.00191637	-0.0354517	-0.0107192	0.05	5e-05	-0.0139349
0.05916	0.0348537	0.00055	0.00055	0.560451	2.875	2.1875	-0.12628	0.00193868	0.0192405	-0.0112375	0.05	5e-05	-0.0146088
0.06032	0.0348537	0.00055	0.00055	0.548936	2.875	2.1875	0.252559	0.00202446	0.0739414	-0.0117709	0.05	5e-05	-0.0153022
0.06148	0.0348537	0.00055	0.00055	0.537201	2.875	2.1875	2.65187	0.00198624	-0.032944	-0.0123467	0.05	5e-05	-0.0160507
0.06264	0.0348537	0.00055	0.00055	0.525865	2.875	2.1875	-2.52559	0.000636632	-1.16346	-0.0129123	0.05	5e-05	-0.016786
0.0638	0.0348537	0.00055	0.00055	0.516823	2.875	2.1875	-0.883957	0.000537222	-0.0856983	-0.0129086	0.05	5e-05	-0.0167811
0.06496	0.0348537	0.00055	0.00055	0.50795	2.875	2.1875	0.631398	0.000875536	0.29165	-0.0128688	0.05	5e-05	-0.0167294
0.06612	0.0348537	0.00055	0.00055	0.5016	2.875	2.1875	0	0.000901813	0.0226526	-0.0129797	0.05	5e-05	-0.0168736
0.06728	0.0348537	0.00055	0.00055	0.494698	2.875	2.1875	0.12628	0.000928536	0.0230371	-0.0131082	0.05	5e-05	-0.0170407
0.06844	0.0348537	0.00055	0.00055	0.487527	2.875	2.1875	1.01024	0.000893225	-0.0304405	-0.0132547	0.05	5e-05	-0.0172311
0.0696	0.0348537	0.00055	0.00055	0.480657	2.875	2.1875	-1.64164	0.000358402	-0.461054	-0.0133926	0.05	5e-05	-0.0174104
0.07076	0.0348537	0.00055	0.00055	0.473951	2.875	2.1875	0.505119	0.000636181	0.239465	-0.013309	0.05	5e-05	-0.0173017
0.07192	0.0348537	0.00055	0.00055	0.467391	2.875	2.1875	2.02047	0.000664298	0.0242388	-0.0133505	0.05	5e-05	-0.0173556
0.07308	0.0348537	0.00055	0.00055	0.461516	2.875	2.1875	-1.76791	-0.000307164	-0.837467	-0.0134105	0.05	5e-05	-0.0174337
0.07424	0.0348537	0.00055	0.00055	0.455092	2.875	2.1875	0	-0.000403859	-0.0833578	-0.0130628	0.05	5e-05	-0.0169817
0.0754	0.0348537	0.00055	0.00055	0.448231	2.875	2.1875	-0.12628	-0.000500753	-0.0835293	-0.0126803	0.05	5e-05	-0.0164844
0.07656	0.0348537	0.00055	0.00055	0.441457	2.875	2.1875	-0.12628	-0.000535401	-0.029869	-0.0122627	0.05	5e-05	-0.0159415
0.07772	0.0348537	0.00055	0.00055	0.435224	2.875	2.1875	0.12628	-0.00050782	0.0237767	-0.0118364	0.05	5e-05	-0.0153873
0.07888	0.0348537	0.00055	0.00055	0.428774	2.875	2.1875	-0.12628	-0.000542985	-0.0303147	-0.0114277	0.05	5e-05	-0.0148561
0.08004	0.0348537	0.00055	0.00055	0.42242	2.875	2.1875	-0.12628	-0.000515924	0.0233284	-0.0110097	0.05	5e-05	-0.0143126
0.0812	0.0348537	0.00055	0.00055	0.415968	2.875	2.1875	0.12628	-0.000426624	0.0769828	-0.0106087	0.05	5e-05	-0.0137913
0.08236	0.0348537	0.00055	0.00055	0.409011	2.875	2.1875	0	-0.000400029	0.0229267	-0.010251	0.05	5e-05	-0.0133263
0.08352	0.0348537	0.00055	0.00055	0.401836	2.875	2.1875	0	-0.000373632	0.022756	-0.00990976	0.05	5e-05	-0.0128827
0.08468	0.0348537	0.00055	0.00055	0.39526	2.875	2.1875	0.883957	-0.000347421	0.0225957	-0.00958467	0.05	5e-05	-0.0124601
0.08584	0.0348537	0.00055	0.00055	0.388821	2.875	2.1875	-0.883957	-0.00075884	-0.354672	-0.00927551	0.05	5e-05	-0.0120582
0.087	0.0348537	0.00055	0.00055	0.382239	2.875	2.1875	0	-0.000733176	0.0221241	-0.00879541	0.05	5e-05	-0.011434
0.08816	0.0348537	0.00055	0.00055	0.376049	2.875	2.1875	0.252559	-0.000707875	0.0218112	-0.00833061	0.05	5e-05	-0.0108298
0.08932	0.0348537	0.00055	0.00055	0.369435	2.875	2.1875	-0.378839	-0.000807912	-0.0862388	-0.00788073	0.05	5e-05	-0.010245
0.09048	0.0348537	0.00055	0.00055	0.362537	2.875	2.1875	0.378839	-0.000720866	0.0750397	-0.00739207	0.05	5e-05	-0.00960969
0.09164	0.0348537	0.00055	0.00055	0.355702	2.875	2.1875	-0.12628	-0.00082166	-0.0868914	-0.00694421	0.05	5e-05	-0.00902747
0.0928	0.0348537	0.00055	0.00055	0.348931	2.875	2.1875	0	-0.000860367	-0.0333681	-0.00645678	0.05	5e-05	-0.00839381
0.09396	0.0348537	0.00055	0.00055	0.342246	2.875	2.1875	-0.12628	-0.000899499	-0.0337345	-0.00595603	0.05	5e-05	-0.00774284
0.09512	0.0348537	0.00055	0.00055	0.335762	2.875	2.1875	0	-0.000876582	0.019756	-0.00544154	0.05	5e-05	-0.007074
0.09628	0.0348537	0.00055	0.00055	0.328816	2.875	2.1875	0	-0.000854099	0.0193819	-0.00493952	0.05	5e-05	-0.00642137
0.09744	0.0348537	0.00055	0.00055	0.321566	2.875	2.1875	0	-0.000832038	0.0190181	-0.00444953	0.05	5e-05	-0.00578439
0.0986	0.0348537	0.00055	0.00055	0.313871	2.875	2.1875	2.39272e-14	-0.000810389	0.0186629	-0.00397115	0.05	5e-05	-0.0051625
0.09976	0.0348537	0.00055	0.00055	0.306577	2.875	2.1875	1.64164	-0.000789142	0.0183164	-0.00350398	0.05	5e-05	-0.00455518
0.10092	0.0348537	0.00055	0.00055	0.299448	2.875	2.1875	-1.76791	-0.00158071	-0.682386	-0.00304761	0.05	5e-05	-0.00396189
0.10208	0.0348537	0.00055	0.00055	0.2926	2.875	2.1875	-2.14675	-0.00149814	0.071181	-0.00225504	0.05	5e-05	-0.00293155
0.10324	0.0348537	0.00055	0.00055	0.285851	2.875	2.1875	2.27303	-0.000353911	0.986404	-0.00149881	0.05	5e-05	-0.00194845
0.1044	0.0348537	0.00055	0.00055	0.278752	2.875	2.1875	0	-0.000334753	0.0165155	-0.00123148	0.05	5e-05	-0.00160093
0.10556	0.0348537	0.00055	0.00055	0.271591	2.875	2.1875	0	-0.00031576	0.0163733	-0.000972941	0.05	5e-05	-0.00126482
0.10672	0.0348537	0.00055	0.00055	0.264863	2.875	2.1875	0.252559	-0.000296924	0.0162379	-0.000722981	0.05	5e-05	-0.000939876
0.10788	0.0348537	0.00055	0.00055	0.257935	2.875	2.1875	0.631398	-0.000403223	-0.0916371	-0.000481416	0.05	5e-05	-0.000625841
0.10904	0.0348537	0.00055	0.00055	0.251143	2.875	2.1875	-0.883957	-0.000822193	-0.361181	-0.000194739	0.05	5e-05	-0.00025316
0.1102	0.0348537	0.00055	0.00055	0.244577	2.875	2.1875	0	-0.00080411	0.0155888	0.000270586	0.05	5e-05	0.000351762
0.11136	0.0348537	0.00055	0.00055	0.237594	2.875	2.1875	-0.12628	-0.000786425	0.0152457	0.000728331	0.05	5e-05	0.00094683
0.11252	0.0348537	0.00055	0.00055	0.230357	2.875	2.1875	-0.883957	-0.000706635	0.0687845	0.00117889	0.05	5e-05	0.00153256
0.11368	0.0348537	0.00055	0.00055	0.223632	2.875	2.1875	1.2628	-0.000189735	0.445603	0.00159599	0.05	5e-05	0.00207479
0.11484	0.0348537	0.00055	0.00055	0.216889	2.875	2.1875	-0.12628	-0.000297871	-0.0932207	0.00179336	0.05	5e-05	0.00233137
0.116	0.0348537	0.00055	0.00055	0.21019	2.875	2.1875	-0.12628	-0.00034366	-0.0394733	0.00203775	0.05	5e-05	0.00264908
0.11716	0.0348537	0.00055	0.00055	0.203846	2.875	2.1875	0	-0.000327126	0.0142534	0.00230268	0.05	5e-05	0.00299349
0.11832	0.0348537	0.00055	0.00055	0.197283	2.875	2.1875	0.631398	-0.000310753	0.0141147	0.0025617	0.05	5e-05	0.00333022
0.11948	0.0348537	0.00055	0.00055	0.190422	2.875	2.1875	-0.631398	-0.000607005	-0.25539	0.00281501	0.05	5e-05	0.00365951
0.12064	0.0348537	0.00055	0.00055	0.182828	2.875	2.1875	-0.505119	-0.000591086	0.0137233	0.00319609	0.05	5e-05	0.00415492
0.1218	0.0348537	0.00055	0.00055	0.175467	2.875	2.1875	0.505119	-0.000325483	0.228968	0.00357196	0.05	5e-05	0.00464355
0.12296	0.0348537	0.00055	0.00055	0.167933	2.875	2.1875	0	-0.000310018	0.0133319	0.00383629	0.05	5e-05	0.00498718
0.12412	0.0348537	0.00055	0.00055	0.160515	2.875	2.1875	-0.252559	-0.000294706	0.0132	0.00409592	0.05	5e-05	0.0053247
0.12528	0.0348537	0.00055	0.00055	0.153563	2.875	2.1875	0.252559	-0.000154552	0.120822	0.00435104	0.05	5e-05	0.00565636
0.12644	0.0348537	0.00055	0.00055	0.146292	2.875	2.1875	0	-0.000139463	0.0130078	0.00454853	0.05	5e-05	0.00591309
0.1276	0.0348537	0.00055	0.00055	0.138791	2.875	2.1875	0	-0.000124442	0.0129491	0.00474183	0.05	5e-05	0.00616437
0.12876	0.0348537	0.00055	0.00055	0.131777	2.875	2.1875	-0.12628	-0.000109484	0.0128948	0.00493106	0.05	5e-05	0.00641038
0.12992	0.0348537	0.00055	0.00055	0.124942	2.875	2.1875	0.12628	-3.2085e-05	0.0667103	0.00511635	0.05	5e-05	0.00665126
0.13108	0.0348537	0.00055	0.00055	0.118301	2.875	2.1875	-0.252559	-1.71963e-05	0.0128448	0.00527117	0.05	5e-05	0.00685252
0.13224	0.0348537	0.00055	0.00055	0.111098	2.875	2.1875	0.252559	0.000122672	0.120579	0.00542223	0.05	5e-05	0.0070489
0.1334	0.0348537	0.00055	0.00055	0.10385	2.875	2.1875	0.12628	0.000137613	0.0128802	0.0055163	0.05	5e-05	0.0071712
0.13456	0.0348537	0.00055	0.00055	0.0965012	2.875	2.1875	-0.12628	9.01278e-05	-0.0409595	0.00560673	0.05	5e-05	0.00728876
0.13572	0.0348537	0.00055	0.00055	0.0894984	2.875	2.1875	-0.12628	0.000105181	0.0130009	0.00572021	0.05	5e-05	0.00743627
0.13688	0.0348537	0.00055	0.00055	0.0824108	2.875	2.1875	0	0.000182781	0.0668966	0.00583008	0.05	5e-05	0.00757911
0.13804	0.0348537	0.00055	0.00055	0.0753241	2.875	2.1875	0.12628	0.000260471	0.0669741	0.00590973	0.05	5e-05	0.00768265
0.1392	0.0348537	0.00055	0.00055	0.0685019	2.875	2.1875	-0.378839	0.000275796	0.0132112	0.00595916	0.05	5e-05	0.00774691
0.14036	0.0348537	0.00055	0.00055	0.0619711	2.875	2.1875	0.505119	0.000478741	0.174953	0.006005	0.05	5e-05	0.00780651
0.14152	0.0348537	0.00055	0.00055	0.0551937	2.875	2.1875	0.12628	0.000431945	-0.0403414	0.00596724	0.05	5e-05	0.00775741
0.14268	0.0348537	0.00055	0.00055	0.048819	2.875	2.1875	0	0.000322868	-0.0940319	0.00595239	0.05	5e-05	0.0077381
0.14384	0.0348537	0.00055	0.00055	0.0420192	2.875	2.1875	-0.12628	0.000213952	-0.0938931	0.00598702	0.05	5e-05	0.00778312
0.145	0.0348537	0.00055	0.00055	0.0351528	2.875	2.1875	-1.38908	0.000167635	-0.0399284	0.00607108	0.05	5e-05	0.0078924
0.14616	0.0348537	0.00055	0.00055	0.0285311	2.875	2.1875	1.2628	0.000808838	0.552761	0.0061779	0.05	5e-05	0.00803127
0.14732	0.0348537	0.00055	0.00055	0.02275	2.875	2.1875	0	0.000825499	0.0143629	0.00601423	0.05	5e-05	0.0078185
0.14848	0.0348537	0.00055	0.00055	0.0165546	2.875	2.1875	0.12628	0.000842569	0.0147155	0.00584642	0.05	5e-05	0.00760035
0.14964	0.0348537	0.00055	0.00055	0.0102327	2.875	2.1875	-0.12628	0.000797561	-0.0388	0.00567423	0.05	5e-05	0.0073765
0.1508	0.0348537	0.00055	0.00055	0.00346659	2.875	2.1875	0	0.000815443	0.0154155	0.00552404	0.05	5e-05	0.00718126
0.15196	0.0348537	0.00055	0.00055	-0.00345634	2.875	2.1875	0	0.000833727	0.0157621	0.00536897	0.05	5e-05	0.00697966
0.15312	0.0348537	0.00055	0.00055	-0.0103258	2.875	2.1875	-0.12628	0.000852425	0.016119	0.00520874	0.05	5e-05	0.00677137
0.15428	0.0348537	0.00055	0.00055	-0.0163738	2.875	2.1875	0.252559	0.000934038	0.070356	0.00504312	0.05	5e-05	0.00655606
0.15544	0.0348537	0.00055	0.00055	-0.0224345	2.875	2.1875	0	0.000891126	-0.0369931	0.00484518	0.05	5e-05	0.00629873
0.1566	0.0348537	0.00055	0.00055	-0.0286886	2.875	2.1875	-0.12628	0.000848654	-0.0366138	0.00466794	0.05	5e-05	0.00606832
0.15776	0.0348537	0.00055	0.00055	-0.0352343	2.875	2.1875	-0.757678	0.000869096	0.0176224	0.00451113	0.05	5e-05	0.00586447
0.15892	0.0348537	0.00055	0.00055	-0.0420034	2.875	2.1875	0.757678	0.00126493	0.34124	0.00434783	0.05	5e-05	0.00565218
0.16008	0.0348537	0.00055	0.00055	-0.0488331	2.875	2.1875	0	0.00128643	0.0185336	0.00401781	0.05	5e-05	0.00522315
0.16124	0.0348537	0.00055	0.00055	-0.0552517	2.875	2.1875	-0.883957	0.00130857	0.0190819	0.0036806	0.05	5e-05	0.00478478
0.1624	0.0348537	0.00055	0.00055	-0.0612502	2.875	2.1875	0.883957	0.00176881	0.396761	0.00333578	0.05	5e-05	0.00433651
0.16356	0.0348537	0.00055	0.00055	-0.0675858	2.875	2.1875	0.12628	0.00179247	0.0203948	0.00279625	0.05	5e-05	0.00363512
0.16472	0.0348537	0.00055	0.00055	-0.0749607	2.875	2.1875	0.12628	0.00175452	-0.0327147	0.00224801	0.05	5e-05	0.00292241
0.16588	0.0348537	0.00055	0.00055	-0.082478	2.875	2.1875	0.757678	0.00165495	-0.0858405	0.00171707	0.05	5e-05	0.0022322
0.16704	0.0348537	0.00055	0.00055	-0.0899753	2.875	2.1875	-1.01024	0.00118122	-0.40838	0.00122947	0.05	5e-05	0.00159831
0.1682	0.0348537	0.00055	0.00055	-0.0973251	2.875	2.1875	0	0.00120804	0.0231181	0.000944576	0.05	5e-05	0.00122795
0.16936	0.0348537	0.00055	0.00055	-0.103754	2.875	2.1875	0.12628	0.00123546	0.0236336	0.000648709	0.05	5e-05	0.000843322
0.17052	0.0348537	0.00055	0.00055	-0.110221	2.875	2.1875	-0.12628	0.00120099	-0.0297138	0.000341467	0.05	5e-05	0.000443908
0.17168	0.0348537	0.00055	0.00055	-0.116681	2.875	2.1875	0	0.00122961	0.0246733	4.90995e-05	0.05	5e-05	6.38293e-05
0.17284	0.0348537	0.00055	0.00055	-0.123548	2.875	2.1875	1.51536	0.00125884	0.0251974	-0.000255455	0.05	5e-05	-0.000332091
0.174	0.0348537	0.00055	0.00055	-0.130166	2.875	2.1875	-1.2628	0.00053876	-0.620757	-0.000572605	0.05	5e-05	-0.000744386
0.17516	0.0348537	0.00055	0.00055	-0.137244	2.875	2.1875	-0.252559	0.00044389	-0.0817845	-0.000582834	0.05	5e-05	-0.000757684
0.17632	0.0348537	0.00055	0.00055	-0.143936	2.875	2.1875	0.12628	0.000474229	0.0261543	-0.000552877	0.05	5e-05	-0.00071874
0.17748	0.0348537	0.00055	0.00055	-0.151036	2.875	2.1875	-0.12628	0.000442308	-0.0275181	-0.000536137	0.05	5e-05	-0.000696978
0.17864	0.0348537	0.00055	0.00055	-0.158102	2.875	2.1875	-0.757678	0.0004731	0.0265448	-0.000506044	0.05	5e-05	-0.000657858
0.1798	0.0348537	0.00055	0.00055	-0.165767	2.875	2.1875	1.13652	0.000879092	0.349993	-0.000489339	0.05	5e-05	-0.00063614
0.18096	0.0348537	0.00055	0.00055	-0.173844	2.875	2.1875	-0.252559	0.00072307	-0.134502	-0.000646082	0.05	5e-05	-0.000839907
0.18212	0.0348537	0.00055	0.00055	-0.181828	2.875	2.1875	-0.252559	0.000692395	-0.026444	-0.000736583	0.05	5e-05	-0.000957558
0.18328	0.0348537	0.00055	0.00055	-0.1893	2.875	2.1875	0.12628	0.000787051	0.0816	-0.000814361	0.05	5e-05	-0.00105867
0.18444	0.0348537	0.00055	0.00055	-0.195903	2.875	2.1875	0	0.000819603	0.0280621	-0.000932925	0.05	5e-05	-0.0012128
0.1856	0.0348537	0.00055	0.00055	-0.202666	2.875	2.1875	0.12628	0.00085256	0.0284112	-0.00106584	0.05	5e-05	-0.00138559
0.18676	0.0348537	0.00055	0.00055	-0.210211	2.875	2.1875	-0.12628	0.000823444	-0.0251	-0.00121334	0.05	5e-05	-0.00157734
0.18792	0.0348537	0.00055	0.00055	-0.218113	2.875	2.1875	0.12628	0.000857231	0.0291267	-0.00134902	0.05	5e-05	-0.00175372
0.18908	0.0348537	0.00055	0.00055	-0.226062	2.875	2.1875	-0.12628	0.000828947	-0.0243828	-0.00149978	0.05	5e-05	-0.00194971
0.19024	0.0348537	0.00055	0.00055	-0.233764	2.875	2.1875	0.252559	0.000863568	0.0298457	-0.00163922	0.05	5e-05	-0.00213098
0.1914	0.0348537	0.00055	0.00055	-0.240643	2.875	2.1875	-0.252559	0.000773628	-0.0775345	-0.00179424	0.05	5e-05	-0.00233251
0.19256	0.0348537	0.00055	0.00055	-0.247628	2.875	2.1875	0	0.000809059	0.030544	-0.00191177	0.05	5e-05	-0.0024853
0.19372	0.0348537	0.00055	0.00055	-0.255048	2.875	2.1875	0.12628	0.00084489	0.0308888	-0.00204537	0.05	5e-05	-0.00265898
0.19488	0.0348537	0.00055	0.00055	-0.262724	2.875	2.1875	-0.12628	0.000818646	-0.0226241	-0.00219527	0.05	5e-05	-0.00285385
0.19604	0.0348537	0.00055	0.00055	-0.270789	2.875	2.1875	-0.378839	0.0008553	0.0315983	-0.00233505	0.05	5e-05	-0.00303557
0.1972	0.0348537	0.00055	0.00055	-0.278648	2.875	2.1875	0.378839	0.00107986	0.193587	-0.00249163	0.05	5e-05	-0.00323912
0.19836	0.0348537	0.00055	0.00055	-0.286049	2.875	2.1875	0.12628	0.00111747	0.032425	-0.00274525	0.05	5e-05	-0.00356882
0.19952	0.0348537	0.00055	0.00055	-0.290595	2.875	2.1875	0	0.00109314	-0.0209733	-0.00301627	0.05	5e-05	-0.00392115
0.20068	0.0348537	0.00055	0.00055	-0.295177	2.875	2.1875	0	0.00106936	-0.0205069	-0.00327841	0.05	5e-05	-0.00426193
0.20184	0.0348537	0.00055	0.00055	-0.3003	2.875	2.1875	0	0.0010461	-0.0200509	-0.00353201	0.05	5e-05	-0.00459162
0.203	0.0348537	0.00055	0.00055	-0.305607	2.875	2.1875	0.12628	0.00102336	-0.0196034	-0.00377745	0.05	5e-05	-0.00491068
0.20416	0.0348537	0.00055	0.00055	-0.310647	2.875	2.1875	-0.378839	0.000938629	-0.0730422	-0.00401505	0.05	5e-05	-0.00521957
0.20532	0.0348537	0.00055	0.00055	-0.315216	2.875	2.1875	0.252559	0.00104185	0.088981	-0.00421849	0.05	5e-05	-0.00548404
0.20648	0.0348537	0.00055	0.00055	-0.318883	2.875	2.1875	-0.12628	0.00102059	-0.0183224	-0.00446806	0.05	5e-05	-0.00580847
0.20764	0.0348537	0.00055	0.00055	-0.322599	2.875	2.1875	0	0.00106234	0.0359871	-0.00471077	0.05	5e-05	-0.00612399
0.2088	0.0348537	0.00055	0.00055	-0.327275	2.875	2.1875	0.12628	0.00110461	0.0364405	-0.00497361	0.05	5e-05	-0.0064657
0.20996	0.0348537	0.00055	0.00055	-0.332491	2.875	2.1875	-0.12628	0.00108493	-0.0169629	-0.00525696	0.05	5e-05	-0.00683405
0.21112	0.0348537	0.00055	0.00055	-0.337572	2.875	2.1875	1.13652	0.00112829	0.0373741	-0.00553451	0.05	5e-05	-0.00719486
0.21228	0.0348537	0.00055	0.00055	-0.342243	2.875	2.1875	-1.2628	0.000609751	-0.447013	-0.0058333	0.05	5e-05	-0.00758328
0.21344	0.0348537	0.00055	0.00055	-0.34647	2.875	2.1875	0	0.00071646	0.0919905	-0.00591375	0.05	5e-05	-0.00768787
0.2146	0.0348537	0.00055	0.00055	-0.350884	2.875	2.1875	3.03071	0.000823523	0.0922957	-0.00604265	0.05	5e-05	-0.00785545
0.21576	0.0348537	0.00055	0.00055	-0.355656	2.875	2.1875	-3.03071	-0.000568868	-1.20034	-0.00622022	0.05	5e-05	-0.00808629
0.21692	0.0348537	0.00055	0.00055	-0.360951	2.875	2.1875	0.252559	-0.000461678	0.0924052	-0.00580684	0.05	5e-05	-0.00754889
0.21808	0.0348537	0.00055	0.00055	-0.367159	2.875	2.1875	-0.12628	-0.000479706	-0.0155414	-0.00544206	0.05	5e-05	-0.00707468
0.21924	0.0348537	0.00055	0.00055	-0.37287	2.875	2.1875	0	-0.000435477	0.0381284	-0.00507228	0.05	5e-05	-0.00659396
0.2204	0.0348537	0.00055	0.00055	-0.377902	2.875	2.1875	0.12628	-0.000391463	0.0379431	-0.00472388	0.05	5e-05	-0.00614105
0.22156	0.0348537	0.00055	0.00055	-0.382342	2.875	2.1875	-0.12628	-0.000410138	-0.0160991	-0.0043966	0.05	5e-05	-0.00571558
0.22272	0.0348537	0.00055	0.00055	-0.387403	2.875	2.1875	0.12628	-0.000366521	0.0376009	-0.00406352	0.05	5e-05	-0.00528258
0.22388	0.0348537	0.00055	0.00055	-0.392904	2.875	2.1875	-0.252559	-0.000385579	-0.0164293	-0.00375107	0.05	5e-05	-0.00487639
0.22504	0.0348537	0.00055	0.00055	-0.398805	2.875	2.1875	0.12628	-0.00027984	0.0911543	-0.00343234	0.05	5e-05	-0.00446204
0.2262	0.0348537	0.00055	0.00055	-0.404492	2.875	2.1875	-0.12628	-0.000236734	0.0371603	-0.00316042	0.05	5e-05	-0.00410855
0.22736	0.0348537	0.00055	0.00055	-0.409315	2.875	2.1875	0.12628	-0.000131251	0.0909336	-0.00290846	0.05	5e-05	-0.00378099
0.22852	0.0348537	0.00055	0.00055	-0.413016	2.875	2.1875	0	-8.83268e-05	0.0370267	-0.00270293	0.05	5e-05	-0.00351381
0.22968	0.0348537	0.00055	0.00055	-0.41507	2.875	2.1875	-1.01024	-4.54464e-05	0.0369828	-0.00251707	0.05	5e-05	-0.00327219
0.23084	0.0348537	0.00055	0.00055	-0.418378	2.875	2.1875	1.01024	0.000497365	0.467901	-0.00235075	0.05	5e-05	-0.00305598
0.232	0.0348537	0.00055	0.00055	-0.422123	2.875	2.1875	0	0.000540469	0.0371586	-0.00241716	0.05	5e-05	-0.00314231
0.23316	0.0348537	0.00055	0.00055	-0.42566	2.875	2.1875	0	0.000583841	0.0373897	-0.00250315	0.05	5e-05	-0.0032541
0.23432	0.0348537	0.00055	0.00055	-0.42886	2.875	2.1875	0	0.000627501	0.0376379	-0.00260889	0.05	5e-05	-0.00339156
0.23548	0.0348537	0.00055	0.00055	-0.431118	2.875	2.1875	0	0.000671472	0.037906	-0.00273454	0.05	5e-05	-0.0035549
0.23664	0.0348537	0.00055	0.00055	-0.433688	2.875	2.1875	0.12628	0.000715776	0.0381931	-0.00288031	0.05	5e-05	-0.0037444
0.2378	0.0348537	0.00055	0.00055	-0.437397	2.875	2.1875	-0.12628	0.000697939	-0.0153767	-0.0030464	0.05	5e-05	-0.00396032
0.23896	0.0348537	0.00055	0.00055	-0.441499	2.875	2.1875	0	0.000742942	0.0387957	-0.00320639	0.05	5e-05	-0.00416831
0.24012	0.0348537	0.00055	0.00055	-0.445622	2.875	2.1875	0.12628	0.000788312	0.0391121	-0.00338717	0.05	5e-05	-0.00440332
0.24128	0.0348537	0.00055	0.00055	-0.449116	2.875	2.1875	-0.12628	0.000771579	-0.014425	-0.00358897	0.05	5e-05	-0.00466567
0.24244	0.0348537	0.00055	0.00055	-0.452045	2.875	2.1875	0	0.000817722	0.0397784	-0.00378542	0.05	5e-05	-0.00492105
0.2436	0.0348537	0.00055	0.00055	-0.453879	2.875	2.1875	0	0.000864269	0.0401267	-0.00400343	0.05	5e-05	-0.00520445
0.24476	0.0348537	0.00055	0.00055	-0.456838	2.875	2.1875	-0.252559	0.000911244	0.0404957	-0.00424327	0.05	5e-05	-0.00551625
0.24592	0.0348537	0.00055	0.00055	-0.462387	2.875	2.1875	1.64164	0.00108366	0.148633	-0.00450526	0.05	5e-05	-0.00585683
0.24708	0.0348537	0.00055	0.00055	-0.468134	2.875	2.1875	-1.51536	0.000444184	-0.551271	-0.00484303	0.05	5e-05	-0.00629594
0.24824	0.0348537	0.00055	0.00055	-0.473879	2.875	2.1875	0.378839	0.00055486	0.0954103	-0.00491038	0.05	5e-05	-0.00638349
0.2494	0.0348537	0.00055	0.00055	-0.478847	2.875	2.1875	-0.252559	0.000478329	-0.065975	-0.00502738	0.05	5e-05	-0.00653559
0.25056	0.0348537	0.00055	0.00055	-0.483177	2.875	2.1875	0.12628	0.000527022	0.0419767	-0.00511421	0.05	5e-05	-0.00664848
0.25172	0.0348537	0.00055	0.00055	-0.488724	2.875	2.1875	-0.12628	0.000513482	-0.0116724	-0.00522435	0.05	5e-05	-0.00679166
0.25288	0.0348537	0.00055	0.00055	-0.495265	2.875	2.1875	0	0.00056269	0.0424207	-0.00533131	0.05	5e-05	-0.0069307
0.25404	0.0348537	0.00055	0.00055	-0.502263	2.875	2.1875	0.631398	0.000612177	0.0426612	-0.00546189	0.05	5e-05	-0.00710045
0.2552	0.0348537	0.00055	0.00055	-0.509098	2.875	2.1875	-0.505119	0.000349496	-0.226449	-0.00561628	0.05	5e-05	-0.00730117
0.25636	0.0348537	0.00055	0.00055	-0.515221	2.875	2.1875	0.12628	0.000336964	-0.0108034	-0.00566139	0.05	5e-05	-0.00735981
0.25752	0.0348537	0.00055	0.00055	-0.520352	2.875	2.1875	-0.252559	0.000262105	-0.0645336	-0.00570396	0.05	5e-05	-0.00741515
0.25868	0.0348537	0.00055	0.00055	-0.52224	2.875	2.1875	0.12628	0.000312364	0.0433267	-0.00571741	0.05	5e-05	-0.00743264
0.25984	0.0348537	0.00055	0.00055	-0.524992	2.875	2.1875	0.252559	0.000300284	-0.0104138	-0.00575513	0.05	5e-05	-0.00748167
0.261	0.0348537	0.00055	0.00055	-0.528156	2.875	2.1875	-0.12628	0.000163363	-0.118035	-0.00579055	0.05	5e-05	-0.00752772
0.26216	0.0348537	0.00055	0.00055	-0.531312	2.875	2.1875	-0.252559	8.90181e-05	-0.064106	-0.00577042	0.05	5e-05	-0.00750155
0.26332	0.0348537	0.00055	0.00055	-0.533887	2.875	2.1875	0	0.000139705	0.0437112	-0.00572142	0.05	5e-05	-0.00743784
0.26448	0.0348537	0.00055	0.00055	-0.535673	2.875	2.1875	-0.378839	0.000190462	0.043756	-0.00569688	0.05	5e-05	-0.00740595
0.26564	0.0348537	0.00055	0.00055	-0.53663	2.875	2.1875	0.505119	0.000428795	0.205459	-0.00569682	0.05	5e-05	-0.00740586
0.2668	0.0348537	0.00055	0.00055	-0.538925	2.875	2.1875	-0.12628	0.000417364	-0.00985431	-0.00580125	0.05	5e-05	-0.00754163
0.26796	0.0348537	0.00055	0.00055	-0.543258	2.875	2.1875	0.12628	0.000468633	0.0441974	-0.00590368	0.05	5e-05	-0.00767479
0.26912	0.0348537	0.00055	0.00055	-0.547514	2.875	2.1875	-0.12628	0.00045764	-0.00947672	-0.00603091	0.05	5e-05	-0.00784018
0.27028	0.0348537	0.00055	0.00055	-0.551315	2.875	2.1875	0.12628	0.000509368	0.0445931	-0.00615642	0.05	5e-05	-0.00800335
0.27144	0.0348537	0.00055	0.00055	-0.554384	2.875	2.1875	-0.12628	0.000498854	-0.00906379	-0.00630706	0.05	5e-05	-0.00819917
0.2726	0.0348537	0.00055	0.00055	-0.556485	2.875	2.1875	0.12628	0.00055108	0.0450224	-0.00645633	0.05	5e-05	-0.00839322
0.27376	0.0348537	0.00055	0.00055	-0.559613	2.875	2.1875	0	0.000541086	-0.00861552	-0.00663107	0.05	5e-05	-0.00862039
0.27492	0.0348537	0.00055	0.00055	-0.563818	2.875	2.1875	-0.252559	0.000531359	-0.00838534	-0.00680484	0.05	5e-05	-0.00884629
0.27608	0.0348537	0.00055	0.00055	-0.568004	2.875	2.1875	0.252559	0.000646883	0.0995897	-0.00697782	0.05	5e-05	-0.00907116
0.27724	0.0348537	0.00055	0.00055	-0.571792	2.875	2.1875	0	0.000637739	-0.00788276	-0.00720354	0.05	5e-05	-0.0093646
0.2784	0.0348537	0.00055	0.00055	-0.575102	2.875	2.1875	0	0.000628911	-0.00761034	-0.00742892	0.05	5e-05	-0.0096576
0.27956	0.0348537	0.00055	0.00055	-0.577376	2.875	2.1875	-0.12628	0.000620394	-0.00734224	-0.00765421	0.05	5e-05	-0.00995048
0.28072	0.0348537	0.00055	0.00055	-0.577386	2.875	2.1875	0	0.000674678	0.0467966	-0.00787966	0.05	5e-05	-0.0102436
0.28188	0.0348537	0.00055	0.00055	-0.578457	2.875	2.1875	0	0.000729296	0.0470845	-0.00813217	0.05	5e-05	-0.0105718
0.28304	0.0348537	0.00055	0.00055	-0.579978	2.875	2.1875	0.12628	0.000784275	0.0473957	-0.008412	0.05	5e-05	-0.0109356
0.2842	0.0348537	0.00055	0.00055	-0.581132	2.875	2.1875	0.12628	0.000777148	-0.00614397	-0.00871946	0.05	5e-05	-0.0113353
0.28536	0.0348537	0.00055	0.00055	-0.581836	2.875	2.1875	-0.252559	0.000707912	-0.0596862	-0.00902818	0.05	5e-05	-0.0117366
0.28652	0.0348537	0.00055	0.00055	-0.581828	2.875	2.1875	0	0.000764014	0.0483638	-0.00931184	0.05	5e-05	-0.0121054
0.28768	0.0348537	0.00055	0.00055	-0.581619	2.875	2.1875	0	0.000820494	0.0486897	-0.00962404	0.05	5e-05	-0.0125112
0.28884	0.0348537	0.00055	0.00055	-0.582451	2.875	2.1875	0	0.00087738	0.0490397	-0.00996509	0.05	5e-05	-0.0129546
0.29	0.0348537	0.00055	0.00055	-0.583634	2.875	2.1875	-0.12628	0.000934701	0.0494147	-0.0103354	0.05	5e-05	-0.013436
0.29116	0.0348537	0.00055	0.00055	-0.584867	2.875	2.1875	0.252559	0.00105498	0.103687	-0.0107352	0.05	5e-05	-0.0139557
0.29232	0.0348537	0.00055	0.00055	-0.585574	2.875	2.1875	-0.12628	0.00105079	-0.00361121	-0.0111916	0.05	5e-05	-0.0145491
0.29348	0.0348537	0.00055	0.00055	-0.585595	2.875	2.1875	0	0.00110961	0.0507112	-0.0116518	0.05	5e-05	-0.0151474
0.29464	0.0348537	0.00055	0.00055	-0.585714	2.875	2.1875	0	0.00116899	0.0511845	-0.0121429	0.05	5e-05	-0.0157858
0.2958	0.0348537	0.00055	0.00055	-0.587023	2.875	2.1875	2.14675	0.00122894	0.0516836	-0.0126653	0.05	5e-05	-0.0164649
0.29696	0.0348537	0.00055	0.00055	-0.588966	2.875	2.1875	-2.14675	0.0002271	-0.863656	-0.0132196	0.05	5e-05	-0.0171854
0.29812	0.0348537	0.00055	0.00055	-0.590907	2.875	2.1875	0.12628	0.000287774	0.0523052	-0.013353	0.05	5e-05	-0.0173588
0.29928	0.0348537	0.00055	0.00055	-0.592492	2.875	2.1875	1.01024	0.000286095	-0.00144741	-0.0135188	0.05	5e-05	-0.0175745
0.30044	0.0348537	0.00055	0.00055	-0.593021	2.875	2.1875	-1.01024	-0.000215395	-0.432319	-0.0136907	0.05	5e-05	-0.0177979
0.3016	0.0348537	0.00055	0.00055	-0.593456	2.875	2.1875	-0.12628	-0.000217039	-0.00141724	-0.0136554	0.05	5e-05	-0.017752
0.30276	0.0348537	0.00055	0.00055	-0.594741	2.875	2.1875	5.98181e-15	-0.000156295	0.0523655	-0.0136261	0.05	5e-05	-0.0177139
0.30392	0.0348537	0.00055	0.00055	-0.596734	2.875	2.1875	0.12628	-9.56294e-05	0.0523233	-0.0136295	0.05	5e-05	-0.0177183
0.30508	0.0348537	0.00055	0.00055	-0.59863	2.875	2.1875	2.27303	-9.75049e-05	-0.00163793	-0.0136655	0.05	5e-05	-0.0177652
0.30624	0.0348537	0.00055	0.00055	-0.599947	2.875	2.1875	-2.27303	-0.00122432	-0.971401	-0.0137075	0.05	5e-05	-0.0178198
0.3074	0.0348537	0.00055	0.00055	-0.600604	2.875	2.1875	-0.12628	-0.00122685	-0.00218017	-0.0132755	0.05	5e-05	-0.0172582
0.30856	0.0348537	0.00055	0.00055	-0.601052	2.875	2.1875	1.51536	-0.0011675	0.0511698	-0.0128491	0.05	5e-05	-0.0167038
0.30972	0.0348537	0.00055	0.00055	-0.601433	2.875	2.1875	-2.77815	-0.00185865	-0.59582	-0.0124543	0.05	5e-05	-0.0161905
0.31088	0.0348537	0.00055	0.00055	-0.603332	2.875	2.1875	1.13652	-0.00117585	0.588622	-0.0117708	0.05	5e-05	-0.015302
0.31204	0.0348537	0.00055	0.00055	-0.605475	2.875	2.1875	0.12628	-0.00105607	0.103252	-0.0113844	0.05	5e-05	-0.0147997
0.3132	0.0348537	0.00055	0.00055	-0.607263	2.875	2.1875	0	-0.000999319	0.0489267	-0.0110548	0.05	5e-05	-0.0143712
0.31436	0.0348537	0.00055	0.00055	-0.608465	2.875	2.1875	0.252559	-0.000943058	0.0485009	-0.0107548	0.05	5e-05	-0.0139813
0.31552	0.0348537	0.00055	0.00055	-0.608524	2.875	2.1875	-0.12628	-0.00101225	-0.05965	-0.0104842	0.05	5e-05	-0.0136294
0.31668	0.0348537	0.00055	0.00055	-0.608348	2.875	2.1875	0.252559	-0.00101945	-0.00620862	-0.0101892	0.05	5e-05	-0.013246
0.31784	0.0348537	0.00055	0.00055	-0.609226	2.875	2.1875	-0.252559	-0.00115215	-0.114391	-0.00989624	0.05	5e-05	-0.0128651
0.319	0.0348537	0.00055	0.00055	-0.610653	2.875	2.1875	-0.12628	-0.00116042	-0.00713448	-0.00955154	0.05	5e-05	-0.012417
0.32016	0.0348537	0.00055	0.00055	-0.611947	2.875	2.1875	0	-0.00110678	0.0462448	-0.00920804	0.05	5e-05	-0.0119704
0.32132	0.0348537	0.00055	0.00055	-0.612432	2.875	2.1875	-0.252559	-0.00105368	0.0457733	-0.00889197	0.05	5e-05	-0.0115596
0.32248	0.0348537	0.00055	0.00055	-0.611948	2.875	2.1875	0.252559	-0.00087612	0.153072	-0.00860297	0.05	5e-05	-0.0111839
0.32364	0.0348537	0.00055	0.00055	-0.611451	2.875	2.1875	0	-0.000823979	0.0449491	-0.00839397	0.05	5e-05	-0.0109122
0.3248	0.0348537	0.00055	0.00055	-0.612115	2.875	2.1875	-0.12628	-0.000772245	0.0445983	-0.00821137	0.05	5e-05	-0.0106748
0.32596	0.0348537	0.00055	0.00055	-0.613501	2.875	2.1875	0	-0.0006584	0.0981422	-0.0080549	0.05	5e-05	-0.0104714
0.32712	0.0348537	0.00055	0.00055	-0.614798	2.875	2.1875	0.252559	-0.00054488	0.0978621	-0.00795099	0.05	5e-05	-0.0103363
0.32828	0.0348537	0.00055	0.00055	-0.615555	2.875	2.1875	0.883957	-0.000556618	-0.010119	-0.00789945	0.05	5e-05	-0.0102693
0.32944	0.0348537	0.00055	0.00055	-0.615539	2.875	2.1875	-1.13652	-0.00100609	-0.387478	-0.00784681	0.05	5e-05	-0.0102009
0.3306	0.0348537	0.00055	0.00055	-0.615684	2.875	2.1875	0.12628	-0.000893615	0.0969629	-0.00760629	0.05	5e-05	-0.00988818
0.33176	0.0348537	0.00055	0.00055	-0.615918	2.875	2.1875	0.12628	-0.000844075	0.0427069	-0.00741753	0.05	5e-05	-0.00964278
0.33292	0.0348537	0.00055	0.00055	-0.617001	2.875	2.1875	0.252559	-0.000857446	-0.0115267	-0.00725357	0.05	5e-05	-0.00942964
0.33408	0.0348537	0.00055	0.00055	-0.617693	2.875	2.1875	-0.252559	-0.000996231	-0.119642	-0.00708749	0.05	5e-05	-0.00921374
0.33524	0.0348537	0.00055	0.00055	-0.617963	2.875	2.1875	0	-0.00101052	-0.0123181	-0.00686571	0.05	5e-05	-0.00892543
0.3364	0.0348537	0.00055	0.00055	-0.618075	2.875	2.1875	0	-0.00102531	-0.0127491	-0.00664124	0.05	5e-05	-0.00863361
0.33756	0.0348537	0.00055	0.00055	-0.618129	2.875	2.1875	-0.252559	-0.00104061	-0.0131871	-0.00641374	0.05	5e-05	-0.00833786
0.33872	0.0348537	0.00055	0.00055	-0.618861	2.875	2.1875	1.13652	-0.000931429	0.0941181	-0.00618289	0.05	5e-05	-0.00803776
0.33988	0.0348537	0.00055	0.00055	-0.619778	2.875	2.1875	-1.01024	-0.00138516	-0.391148	-0.00600168	0.05	5e-05	-0.00780218
0.34104	0.0348537	0.00055	0.00055	-0.62033	2.875	2.1875	0	-0.00133962	0.0392552	-0.00562986	0.05	5e-05	-0.00731882
0.3422	0.0348537	0.00055	0.00055	-0.620332	2.875	2.1875	0	-0.00129475	0.0386845	-0.00528026	0.05	5e-05	-0.00686433
0.34336	0.0348537	0.00055	0.00055	-0.620496	2.875	2.1875	0	-0.00125052	0.038131	-0.00495241	0.05	5e-05	-0.00643813
0.34452	0.0348537	0.00055	0.00055	-0.620555	2.875	2.1875	0	-0.00120691	0.0375983	-0.00464589	0.05	5e-05	-0.00603965
0.34568	0.0348537	0.00055	0.00055	-0.62149	2.875	2.1875	0.12628	-0.00116389	0.0370828	-0.00436027	0.05	5e-05	-0.00566835
0.34684	0.0348537	0.00055	0.00055	-0.622814	2.875	2.1875	-0.252559	-0.00118394	-0.0172879	-0.00409516	0.05	5e-05	-0.00532371
0.348	0.0348537	0.00055	0.00055	-0.623821	2.875	2.1875	0.631398	-0.00107959	0.089956	-0.00382352	0.05	5e-05	-0.00497058
0.34916	0.0348537	0.00055	0.00055	-0.623907	2.875	2.1875	-0.505119	-0.00128825	-0.179877	-0.00359829	0.05	5e-05	-0.00467778
0.35032	0.0348537	0.00055	0.00055	-0.623931	2.875	2.1875	0.12628	-0.00124757	0.0350716	-0.00328583	0.05	5e-05	-0.00427158
0.35148	0.0348537	0.00055	0.00055	-0.624025	2.875	2.1875	-0.252559	-0.00127	-0.0193353	-0.00299235	0.05	5e-05	-0.00389005
0.35264	0.0348537	0.00055	0.00055	-0.624853	2.875	2.1875	0.631398	-0.00116807	0.0878716	-0.00269078	0.05	5e-05	-0.00349801
0.3538	0.0348537	0.00055	0.00055	-0.626268	2.875	2.1875	-1.38908	-0.00137918	-0.181998	-0.00243402	0.05	5e-05	-0.00316423
0.35496	0.0348537	0.00055	0.00055	-0.627462	2.875	2.1875	1.13652	-0.000903549	0.41003	-0.00208841	0.05	5e-05	-0.00271493
0.35612	0.0348537	0.00055	0.00055	-0.627784	2.875	2.1875	0.252559	-0.000990808	-0.0752233	-0.00194674	0.05	5e-05	-0.00253076
0.35728	0.0348537	0.00055	0.00055	-0.627923	2.875	2.1875	-0.505119	-0.00120355	-0.183396	-0.00176881	0.05	5e-05	-0.00229946
0.35844	0.0348537	0.00055	0.00055	-0.627932	2.875	2.1875	0	-0.0011669	0.0315888	-0.001501	0.05	5e-05	-0.0019513
0.3596	0.0348537	0.00055	0.00055	-0.627803	2.875	2.1875	0	-0.00113084	0.0310914	-0.00124956	0.05	5e-05	-0.00162443
0.36076	0.0348537	0.00055	0.00055	-0.628216	2.875	2.1875	-0.883957	-0.00109533	0.0306086	-0.00101413	0.05	5e-05	-0.00131837
0.36192	0.0348537	0.00055	0.00055	-0.628723	2.875	2.1875	0.883957	-0.000622909	0.407261	-0.000794349	0.05	5e-05	-0.00103265
0.36308	0.0348537	0.00055	0.00055	-0.629047	2.875	2.1875	0	-0.000588253	0.0298759	-0.000776508	0.05	5e-05	-0.00100946
0.36424	0.0348537	0.00055	0.00055	-0.629561	2.875	2.1875	0	-0.000553889	0.0296241	-0.000773837	0.05	5e-05	-0.00100599
0.3654	0.0348537	0.00055	0.00055	-0.63007	2.875	2.1875	0.12628	-0.000519799	0.0293879	-0.000786209	0.05	5e-05	-0.00102207
0.36656	0.0348537	0.00055	0.00055	-0.631523	2.875	2.1875	0	-0.00054846	-0.0247078	-0.000813514	0.05	5e-05	-0.00105757
0.36772	0.0348537	0.00055	0.00055	-0.633589	2.875	2.1875	0.12628	-0.000577393	-0.0249422	-0.000828994	0.05	5e-05	-0.00107769
0.36888	0.0348537	0.00055	0.00055	-0.635784	2.875	2.1875	-0.378839	-0.000669105	-0.0790621	-0.000832541	0.05	5e-05	-0.0010823
0.37004	0.0348537	0.00055	0.00055	-0.637644	2.875	2.1875	0.252559	-0.000573666	0.082275	-0.000797373	0.05	5e-05	-0.00103659
0.3712	0.0348537	0.00055	0.00055	-0.638815	2.875	2.1875	0	-0.000603499	-0.0257181	-0.000803317	0.05	5e-05	-0.00104431
0.37236	0.0348537	0.00055	0.00055	-0.639884	2.875	2.1875	0.378839	-0.000633631	-0.0259759	-0.00079693	0.05	5e-05	-0.00103601
0.37352	0.0348537	0.00055	0.00055	-0.641031	2.875	2.1875	-0.505119	-0.00085156	-0.18787	-0.000778083	0.05	5e-05	-0.00101151
0.37468	0.0348537	0.00055	0.00055	-0.642755	2.875	2.1875	-0.12628	-0.000819933	0.0272647	-0.000666646	0.05	5e-05	-0.00086664
0.37584	0.0348537	0.00055	0.00055	-0.644954	2.875	2.1875	0.12628	-0.000726217	0.0807897	-0.000569032	0.05	5e-05	-0.000739742
0.377	0.0348537	0.00055	0.00055	-0.646896	2.875	2.1875	0.252559	-0.000695355	0.0266052	-0.000511682	0.05	5e-05	-0.000665187
0.37816	0.0348537	0.00055	0.00055	-0.648271	2.875	2.1875	0.12628	-0.000789825	-0.0814397	-0.000467751	0.05	5e-05	-0.000608077
0.37932	0.0348537	0.00055	0.00055	-0.650066	2.875	2.1875	-0.378839	-0.000947181	-0.135652	-0.000383749	0.05	5e-05	-0.000498874
0.38048	0.0348537	0.00055	0.00055	-0.651818	2.875	2.1875	0	-0.000917523	0.0255672	-0.000232804	0.05	5e-05	-0.000302645
0.38164	0.0348537	0.00055	0.00055	-0.653203	2.875	2.1875	0	-0.000888319	0.0251759	-9.46269e-05	0.05	5e-05	-0.000123015
0.3828	0.0348537	0.00055	0.00055	-0.655241	2.875	2.1875	5.98181e-15	-0.000859554	0.0247974	3.10439e-05	0.05	5e-05	4.03571e-05
0.38396	0.0348537	0.00055	0.00055	-0.657067	2.875	2.1875	0.12628	-0.000831215	0.0244302	0.000144458	0.05	5e-05	0.000187796
0.38512	0.0348537	0.00055	0.00055	-0.658255	2.875	2.1875	0	-0.000865781	-0.0297983	0.000245854	0.05	5e-05	0.00031961
0.38628	0.0348537	0.00055	0.00055	-0.659542	2.875	2.1875	-0.252559	-0.000900776	-0.0301681	0.000362118	0.05	5e-05	0.000470753
0.38744	0.0348537	0.00055	0.00055	-0.66091	2.875	2.1875	0.252559	-0.000811228	0.0771966	0.000493491	0.05	5e-05	0.000641538
0.3886	0.0348537	0.00055	0.00055	-0.66169	2.875	2.1875	-0.252559	-0.00084707	-0.0308983	0.000586905	0.05	5e-05	0.000762976
0.38976	0.0348537	0.00055	0.00055	-0.663003	2.875	2.1875	0.12628	-0.000758343	0.0764888	0.0006959	0.05	5e-05	0.00090467
0.39092	0.0348537	0.00055	0.00055	-0.664683	2.875	2.1875	0	-0.000732486	0.0222905	0.000767386	0.05	5e-05	0.000997602
0.39208	0.0348537	0.00055	0.00055	-0.666097	2.875	2.1875	0	-0.00070699	0.0219793	0.000828221	0.05	5e-05	0.00107669
0.39324	0.0348537	0.00055	0.00055	-0.66791	2.875	2.1875	0	-0.000681845	0.0216767	0.000878589	0.05	5e-05	0.00114217
0.3944	0.0348537	0.00055	0.00055	-0.669684	2.875	2.1875	1.79454e-14	-0.000657037	0.0213862	0.000918663	0.05	5e-05	0.00119426
0.39556	0.0348537	0.00055	0.00055	-0.671365	2.875	2.1875	0.378839	-0.000632555	0.0211052	0.000948609	0.05	5e-05	0.00123319
0.39672	0.0348537	0.00055	0.00055	-0.668741	2.875	2.1875	-0.378839	-0.000795868	-0.140787	0.000968579	0.05	5e-05	0.00125915
0.39788	0.0348537	0.00055	0.00055	-0.666511	2.875	2.1875	0	-0.000772092	0.0204966	0.0010587	0.05	5e-05	0.00137631
0.39904	0.0348537	0.00055	0.00055	-0.664259	2.875	2.1875	0.12628	-0.000748698	0.0201672	0.00113921	0.05	5e-05	0.00148097
0.4002	0.0348537	0.00055	0.00055	-0.662304	2.875	2.1875	-0.12628	-0.00078817	-0.0340276	0.00121029	0.05	5e-05	0.00157338
0.40136	0.0348537	0.00055	0.00055	-0.660479	2.875	2.1875	-0.12628	-0.000765536	0.0195121	0.00129882	0.05	5e-05	0.00168847
0.40252	0.0348537	0.00055	0.00055	-0.658106	2.875	2.1875	0.252559	-0.000680788	0.0730586	0.00137833	0.05	5e-05	0.00179183
0.40368	0.0348537	0.00055	0.00055	-0.655001	2.875	2.1875	0	-0.000721365	-0.0349802	0.00142237	0.05	5e-05	0.00184908
0.40484	0.0348537	0.00055	0.00055	-0.652136	2.875	2.1875	-0.12628	-0.000762299	-0.0352879	0.00148442	0.05	5e-05	0.00192975
0.406	0.0348537	0.00055	0.00055	-0.64901	2.875	2.1875	-0.631398	-0.000741116	0.0182612	0.00156468	0.05	5e-05	0.00203408
0.40716	0.0348537	0.00055	0.00055	-0.643897	2.875	2.1875	1.13652	-0.000407828	0.287317	0.00163667	0.05	5e-05	0.00212767
0.40832	0.0348537	0.00055	0.00055	-0.639076	2.875	2.1875	-1.01024	-0.000637191	-0.197727	0.00156728	0.05	5e-05	0.00203746
0.40948	0.0348537	0.00055	0.00055	-0.634178	2.875	2.1875	0.631398	-0.000366915	0.232997	0.00159651	0.05	5e-05	0.00207547
0.41064	0.0348537	0.00055	0.00055	-0.628981	2.875	2.1875	0	-0.000409292	-0.0365319	0.00151123	0.05	5e-05	0.0019646
0.4118	0.0348537	0.00055	0.00055	-0.624354	2.875	2.1875	0	-0.000451871	-0.036706	0.00144478	0.05	5e-05	0.00187821
0.41296	0.0348537	0.00055	0.00055	-0.620081	2.875	2.1875	-0.12628	-0.000494674	-0.0368991	0.00139721	0.05	5e-05	0.00181637
0.41412	0.0348537	0.00055	0.00055	-0.61577	2.875	2.1875	0.757678	-0.000475227	0.0167647	0.00136859	0.05	5e-05	0.00177917
0.41528	0.0348537	0.00055	0.00055	-0.610924	2.875	2.1875	-0.505119	-0.000830981	-0.306684	0.00133235	0.05	5e-05	0.00173206
0.41644	0.0348537	0.00055	0.00055	-0.605203	2.875	2.1875	-0.12628	-0.000937169	-0.0915414	0.00144854	0.05	5e-05	0.00188311
0.4176	0.0348537	0.00055	0.00055	-0.599947	2.875	2.1875	-0.883957	-0.000981327	-0.0380672	0.00161076	0.05	5e-05	0.00209399
0.41876	0.0348537	0.00055	0.00055	-0.595126	2.875	2.1875	0.883957	-0.000588511	0.338634	0.00179261	0.05	5e-05	0.00233039
0.41992	0.0348537	0.00055	0.00055	-0.59054	2.875	2.1875	-0.12628	-0.000633446	-0.0387371	0.00180776	0.05	5e-05	0.00235009
0.42108	0.0348537	0.00055	0.00055	-0.586291	2.875	2.1875	0	-0.0006162	0.0148672	0.00184298	0.05	5e-05	0.00239587
0.42224	0.0348537	0.00055	0.00055	-0.58208	2.875	2.1875	0.505119	-0.000599259	0.0146043	0.00187175	0.05	5e-05	0.00243327
0.4234	0.0348537	0.00055	0.00055	-0.577004	2.875	2.1875	-0.505119	-0.000832592	-0.201149	0.00189422	0.05	5e-05	0.00246248
0.42456	0.0348537	0.00055	0.00055	-0.57223	2.875	2.1875	0	-0.000816359	0.013994	0.00201717	0.05	5e-05	0.00262232
0.42572	0.0348537	0.00055	0.00055	-0.567357	2.875	2.1875	-0.12628	-0.000800531	0.0136448	0.0021342	0.05	5e-05	0.00277446
0.42688	0.0348537	0.00055	0.00055	-0.562852	2.875	2.1875	0.12628	-0.000722604	0.0671784	0.00224553	0.05	5e-05	0.00291919
0.42804	0.0348537	0.00055	0.00055	-0.558375	2.875	2.1875	-0.252559	-0.00070753	0.0129948	0.00232472	0.05	5e-05	0.00302214
0.4292	0.0348537	0.00055	0.00055	-0.553548	2.875	2.1875	0.252559	-0.000567817	0.120442	0.00239864	0.05	5e-05	0.00311823
0.43036	0.0348537	0.00055	0.00055	-0.548139	2.875	2.1875	1.2628	-0.000553373	0.0124517	0.00241414	0.05	5e-05	0.00313838
0.43152	0.0348537	0.00055	0.00055	-0.54297	2.875	2.1875	-1.2628	-0.00116415	-0.526528	0.00242467	0.05	5e-05	0.00315206
0.43268	0.0348537	0.00055	0.00055	-0.537966	2.875	2.1875	-0.757678	-0.00115055	0.011719	0.00269697	0.05	5e-05	0.00350606
0.43384	0.0348537	0.00055	0.00055	-0.53356	2.875	2.1875	1.01024	-0.000762563	0.334473	0.0029648	0.05	5e-05	0.00385424
0.435	0.0348537	0.00055	0.00055	-0.529362	2.875	2.1875	-0.252559	-0.000874905	-0.0968466	0.00306858	0.05	5e-05	0.00398915
0.43616	0.0348537	0.00055	0.00055	-0.524996	2.875	2.1875	0	-0.000862691	0.0105293	0.0032218	0.05	5e-05	0.00418835
0.43732	0.0348537	0.00055	0.00055	-0.520153	2.875	2.1875	0.12628	-0.000850904	0.0101612	0.00337141	0.05	5e-05	0.00438284
0.43848	0.0348537	0.00055	0.00055	-0.514395	2.875	2.1875	-0.12628	-0.000902033	-0.0440767	0.00351766	0.05	5e-05	0.00457296
0.43964	0.0348537	0.00055	0.00055	-0.508914	2.875	2.1875	0	-0.000891114	0.00941293	0.00368746	0.05	5e-05	0.0047937
0.4408	0.0348537	0.00055	0.00055	-0.503576	2.875	2.1875	-0.252559	-0.000880635	0.00903362	0.00385443	0.05	5e-05	0.00501076
0.44196	0.0348537	0.00055	0.00055	-0.498722	2.875	2.1875	0.378839	-0.000745604	0.116406	0.00401883	0.05	5e-05	0.00522448
0.44312	0.0348537	0.00055	0.00055	-0.494001	2.875	2.1875	-0.757678	-0.000798425	-0.0455353	0.00412762	0.05	5e-05	0.0053659
0.44428	0.0348537	0.00055	0.00055	-0.488513	2.875	2.1875	0.631398	-0.000476676	0.27737	0.00426098	0.05	5e-05	0.00553928
0.44544	0.0348537	0.00055	0.00055	-0.482019	2.875	2.1875	0.252559	-0.000467633	0.00779569	0.00425919	0.05	5e-05	0.00553694
0.4466	0.0348537	0.00055	0.00055	-0.475832	2.875	2.1875	-0.12628	-0.000583811	-0.100153	0.00425564	0.05	5e-05	0.00553233
0.44776	0.0348537	0.00055	0.00055	-0.470454	2.875	2.1875	-2.52559	-0.000637783	-0.0465276	0.00430377	0.05	5e-05	0.0055949
0.44892	0.0348537	0.00055	0.00055	-0.465739	2.875	2.1875	2.39931	0.000557814	1.03069	0.00437705	0.05	5e-05	0.00569016
0.45008	0.0348537	0.00055	0.00055	-0.461793	2.875	2.1875	0.12628	0.000566296	0.00731207	0.00394242	0.05	5e-05	0.00512515
0.45124	0.0348537	0.00055	0.00055	-0.457728	2.875	2.1875	-0.12628	0.000512565	-0.0463198	0.00350613	0.05	5e-05	0.00455797
0.4524	0.0348537	0.00055	0.00055	-0.452938	2.875	2.1875	0	0.000521581	0.00777241	0.00309449	0.05	5e-05	0.00402284
0.45356	0.0348537	0.00055	0.00055	-0.448767	2.875	2.1875	0	0.000530856	0.00799569	0.00268054	0.05	5e-05	0.0034847
0.45472	0.0348537	0.00055	0.00055	-0.444817	2.875	2.1875	-0.378839	0.000540393	0.00822155	0.00226396	0.05	5e-05	0.00294315
0.45588	0.0348537	0.00055	0.00055	-0.441316	2.875	2.1875	0.378839	0.00073768	0.170075	0.00184443	0.05	5e-05	0.00239776
0.45704	0.0348537	0.00055	0.00055	-0.438174	2.875	2.1875	0.12628	0.00074785	0.00876724	0.00134165	0.05	5e-05	0.00174414
0.4582	0.0348537	0.00055	0.00055	-0.434772	2.875	2.1875	1.64164	0.000695896	-0.0447879	0.000835186	0.05	5e-05	0.00108574
0.45936	0.0348537	0.00055	0.00055	-0.430432	2.875	2.1875	-1.76791	-0.000168139	-0.744858	0.000351304	0.05	5e-05	0.000456696
0.46052	0.0348537	0.00055	0.00055	-0.425014	2.875	2.1875	0	-0.000157338	0.00931121	0.000236218	0.05	5e-05	0.000307083
0.46168	0.0348537	0.00055	0.00055	-0.419829	2.875	2.1875	1.01024	-0.000146615	0.00924397	0.00011664	0.05	5e-05	0.000151632
0.46284	0.0348537	0.00055	0.00055	-0.41555	2.875	2.1875	-1.2628	-0.000635918	-0.421813	-7.4551e-06	0.05	5e-05	-9.69163e-06
0.464	0.0348537	0.00055	0.00055	-0.411688	2.875	2.1875	0.252559	-0.000500593	0.116659	7.71963e-05	0.05	5e-05	0.000100355
0.46516	0.0348537	0.00055	0.00055	-0.407475	2.875	2.1875	0	-0.000490505	0.00869655	0.000104153	0.05	5e-05	0.000135398
0.46632	0.0348537	0.00055	0.00055	-0.402679	2.875	2.1875	0	-0.00048066	0.00848707	0.000126857	0.05	5e-05	0.000164914
0.46748	0.0348537	0.00055	0.00055	-0.396988	2.875	2.1875	-2.27303	-0.000471052	0.00828276	0.000145423	0.05	5e-05	0.00018905
0.46864	0.0348537	0.00055	0.00055	-0.391639	2.875	2.1875	2.27303	0.000663218	0.977819	0.000159963	0.05	5e-05	0.000207952
0.4698	0.0348537	0.00055	0.00055	-0.387432	2.875	2.1875	0.12628	0.000672921	0.00836466	-0.000309329	0.05	5e-05	-0.000402128
0.47096	0.0348537	0.00055	0.00055	-0.383872	2.875	2.1875	-0.505119	0.000620462	-0.0452233	-0.000782913	0.05	5e-05	-0.00101779
0.47212	0.0348537	0.00055	0.00055	-0.380339	2.875	2.1875	0.378839	0.000818288	0.17054	-0.0012345	0.05	5e-05	-0.00160486
0.47328	0.0348537	0.00055	0.00055	-0.37628	2.875	2.1875	0	0.000829035	0.00926466	-0.0017711	0.05	5e-05	-0.00230244
0.47444	0.0348537	0.00055	0.00055	-0.371384	2.875	2.1875	0.12628	0.000840193	0.00961897	-0.00231317	0.05	5e-05	-0.00300712
0.4756	0.0348537	0.00055	0.00055	-0.366995	2.875	2.1875	0.12628	0.000789273	-0.0438966	-0.00286113	0.05	5e-05	-0.00371947
0.47676	0.0348537	0.00055	0.00055	-0.363991	2.875	2.1875	1.51536	0.000676249	-0.0974345	-0.00338879	0.05	5e-05	-0.00440543
0.47792	0.0348537	0.00055	0.00055	-0.361717	2.875	2.1875	-0.757678	-0.000186371	-0.743638	-0.00386991	0.05	5e-05	-0.00503088
0.47908	0.0348537	0.00055	0.00055	-0.359376	2.875	2.1875	-0.883957	-0.000674118	-0.420472	-0.00398492	0.05	5e-05	-0.0051804
0.48024	0.0348537	0.00055	0.00055	-0.356742	2.875	2.1875	-0.12628	-0.000724739	-0.0436388	-0.00389382	0.05	5e-05	-0.00506197
0.4814	0.0348537	0.00055	0.00055	-0.353481	2.875	2.1875	-0.631398	-0.000713225	0.00992586	-0.00378306	0.05	5e-05	-0.00491797
0.48256	0.0348537	0.00055	0.00055	-0.349105	2.875	2.1875	1.2628	-0.000389592	0.278994	-0.00367907	0.05	5e-05	-0.00478279
0.48372	0.0348537	0.00055	0.00055	-0.345024	2.875	2.1875	-0.505119	-0.000691094	-0.259916	-0.00371498	0.05	5e-05	-0.00482947
0.48488	0.0348537	0.00055	0.00055	-0.341859	2.875	2.1875	-0.12628	-0.000742962	-0.0447138	-0.0036241	0.05	5e-05	-0.00471132
0.48604	0.0348537	0.00055	0.00055	-0.338975	2.875	2.1875	0	-0.000732703	0.00884397	-0.00351288	0.05	5e-05	-0.00456674
0.4872	0.0348537	0.00055	0.00055	-0.335953	2.875	2.1875	0	-0.000722806	0.0085319	-0.00340777	0.05	5e-05	-0.00443011
0.48836	0.0348537	0.00055	0.00055	-0.332193	2.875	2.1875	0	-0.000713267	0.00822328	-0.00330858	0.05	5e-05	-0.00430116
0.48952	0.0348537	0.00055	0.00055	-0.327456	2.875	2.1875	0.12628	-0.000704081	0.00791897	-0.00321509	0.05	5e-05	-0.00417962
0.49068	0.0348537	0.00055	0.00055	-0.323175	2.875	2.1875	0	-0.000757738	-0.046256	-0.00312712	0.05	5e-05	-0.00406525
0.49184	0.0348537	0.00055	0.00055	-0.320102	2.875	2.1875	-0.12628	-0.00081177	-0.0465793	-0.0030178	0.05	5e-05	-0.00392314
0.493	0.0348537	0.00055	0.00055	-0.317471	2.875	2.1875	0.12628	-0.00080371	0.00694828	-0.00288692	0.05	5e-05	-0.00375299
0.49416	0.0348537	0.00055	0.00055	-0.314616	2.875	2.1875	0	-0.000858541	-0.0472681	-0.00276091	0.05	5e-05	-0.00358918
0.49532	0.0348537	0.00055	0.00055	-0.311106	2.875	2.1875	-0.12628	-0.000913797	-0.0476345	-0.00261287	0.05	5e-05	-0.00339673
0.49648	0.0348537	0.00055	0.00055	-0.30646	2.875	2.1875	3.53583	-0.000907011	0.00585	-0.00244255	0.05	5e-05	-0.00317531
0.49764	0.0348537	0.00055	0.00055	-0.301596	2.875	2.1875	-3.40955	-0.00265051	-1.50302	-0.00227634	0.05	5e-05	-0.00295924
0.4988	0.0348537	0.00055	0.00055	-0.29783	2.875	2.1875	1.2628	-0.00270798	-0.0495422	-0.00136742	0.05	5e-05	-0.00177765
0.49996	0.0348537	0.00055	0.00055	-0.294861	2.875	2.1875	-3.28327	-0.00339173	-0.589441	-0.000434668	0.05	5e-05	-0.000565068
0.50112	0.0348537	0.00055	0.00055	-0.291579	2.875	2.1875	0.883957	-0.00245231	0.809845	0.000789578	0.05	5e-05	0.00102645
0.50228	0.0348537	0.00055	0.00055	-0.288024	2.875	2.1875	1.01024	-0.00195157	0.431678	0.00161343	0.05	5e-05	0.00209746
0.50344	0.0348537	0.00055	0.00055	-0.283713	2.875	2.1875	-0.378839	-0.00195174	-0.000149138	0.00222445	0.05	5e-05	0.00289179
0.5046	0.0348537	0.00055	0.00055	-0.278281	2.875	2.1875	0.378839	-0.0017654	0.160641	0.00283665	0.05	5e-05	0.00368764
0.50576	0.0348537	0.00055	0.00055	-0.274035	2.875	2.1875	-1.64164	-0.00176741	-0.00173448	0.00337075	0.05	5e-05	0.00438197
0.50692	0.0348537	0.00055	0.00055	-0.270546	2.875	2.1875	1.64164	-0.000957871	0.697877	0.00390738	0.05	5e-05	0.00507959
0.50808	0.0348537	0.00055	0.00055	-0.267148	2.875	2.1875	0.12628	-0.000961232	-0.00289741	0.00410057	0.05	5e-05	0.00533074
0.50924	0.0348537	0.00055	0.00055	-0.263386	2.875	2.1875	-1.13652	-0.00102756	-0.0571819	0.00429722	0.05	5e-05	0.00558639
0.5104	0.0348537	0.00055	0.00055	-0.258803	2.875	2.1875	1.13652	-0.000531955	0.427248	0.0045243	0.05	5e-05	0.00588159
0.51156	0.0348537	0.00055	0.00055	-0.253159	2.875	2.1875	0	-0.000599057	-0.0578466	0.00454218	0.05	5e-05	0.00590483
0.51272	0.0348537	0.00055	0.00055	-0.248517	2.875	2.1875	-1.01024	-0.000666457	-0.0581034	0.00459093	0.05	5e-05	0.00596821
0.51388	0.0348537	0.00055	0.00055	-0.244649	2.875	2.1875	1.01024	-0.000234232	0.372608	0.00467071	0.05	5e-05	0.00607192
0.51504	0.0348537	0.00055	0.00055	-0.241024	2.875	2.1875	0.757678	-0.000302077	-0.0584871	0.0045684	0.05	5e-05	0.00593892
0.5162	0.0348537	0.00055	0.00055	-0.237042	2.875	2.1875	-0.757678	-0.000745037	-0.381862	0.0044973	0.05	5e-05	0.00584649
0.51736	0.0348537	0.00055	0.00055	-0.232374	2.875	2.1875	-0.12628	-0.0008134	-0.0589336	0.0046174	0.05	5e-05	0.00600262
0.51852	0.0348537	0.00055	0.00055	-0.226951	2.875	2.1875	0	-0.000819672	-0.0054069	0.00476895	0.05	5e-05	0.00619964
0.51968	0.0348537	0.00055	0.00055	-0.222262	2.875	2.1875	0.12628	-0.000826349	-0.00575603	0.00492554	0.05	5e-05	0.00640321
0.52084	0.0348537	0.00055	0.00055	-0.218731	2.875	2.1875	-0.252559	-0.00089593	-0.0599836	0.00508742	0.05	5e-05	0.00661364
0.522	0.0348537	0.00055	0.00055	-0.215402	2.875	2.1875	0.12628	-0.000840965	0.0473836	0.00528149	0.05	5e-05	0.00686594
0.52316	0.0348537	0.00055	0.00055	-0.212141	2.875	2.1875	0.12628	-0.000848911	-0.00685	0.00545474	0.05	5e-05	0.00709116
0.52432	0.0348537	0.00055	0.00055	-0.208347	2.875	2.1875	0	-0.000919771	-0.0610862	0.00563407	0.05	5e-05	0.00732429
0.52548	0.0348537	0.00055	0.00055	-0.203391	2.875	2.1875	-0.252559	-0.000991086	-0.0614784	0.00584642	0.05	5e-05	0.00760034
0.52664	0.0348537	0.00055	0.00055	-0.197274	2.875	2.1875	0.252559	-0.000937904	0.0458466	0.00609209	0.05	5e-05	0.00791971
0.5278	0.0348537	0.00055	0.00055	-0.192375	2.875	2.1875	0	-0.00101017	-0.0623017	0.00631808	0.05	5e-05	0.00821351
0.52896	0.0348537	0.00055	0.00055	-0.188144	2.875	2.1875	0	-0.00108294	-0.0627328	0.00657803	0.05	5e-05	0.00855145
0.53012	0.0348537	0.00055	0.00055	-0.183572	2.875	2.1875	-3.03071	-0.00115625	-0.063194	0.00687229	0.05	5e-05	0.00893398
0.53128	0.0348537	0.00055	0.00055	-0.178572	2.875	2.1875	2.90443	0.000269734	1.2293	0.00720122	0.05	5e-05	0.00936158
0.53244	0.0348537	0.00055	0.00055	-0.172613	2.875	2.1875	0	0.000258484	-0.00969828	0.00692535	0.05	5e-05	0.00900295
0.5336	0.0348537	0.00055	0.00055	-0.165603	2.875	2.1875	0	0.000247361	-0.00958879	0.00665771	0.05	5e-05	0.00865502
0.53476	0.0348537	0.00055	0.00055	-0.159896	2.875	2.1875	0	0.000236361	-0.00948276	0.0063981	0.05	5e-05	0.00831753
0.53592	0.0348537	0.00055	0.00055	-0.155364	2.875	2.1875	0	0.000225478	-0.0093819	0.00614636	0.05	5e-05	0.00799027
0.53708	0.0348537	0.00055	0.00055	-0.150717	2.875	2.1875	0	0.000214707	-0.00928534	0.0059023	0.05	5e-05	0.00767299
0.53824	0.0348537	0.00055	0.00055	-0.145573	2.875	2.1875	0.12628	0.000204042	-0.00919397	0.00566576	0.05	5e-05	0.00736549
0.5394	0.0348537	0.00055	0.00055	-0.139845	2.875	2.1875	-0.12628	0.000130983	-0.0629819	0.00543657	0.05	5e-05	0.00706754
0.54056	0.0348537	0.00055	0.00055	-0.133269	2.875	2.1875	0	0.000120484	-0.00905086	0.00524124	0.05	5e-05	0.00681361
0.54172	0.0348537	0.00055	0.00055	-0.127251	2.875	2.1875	0	0.000110044	-0.009	0.00505299	0.05	5e-05	0.00656888
0.54288	0.0348537	0.00055	0.00055	-0.122391	2.875	2.1875	0	9.96589e-05	-0.00891724	0.00487168	0.05	5e-05	0.00633319
0.54404	0.0348537	0.00055	0.00055	-0.117739	2.875	2.1875	0.12628	8.93229e-05	-0.00896552	0.00469721	0.05	5e-05	0.00610637
0.5452	0.0348537	0.00055	0.00055	-0.112691	2.875	2.1875	-0.12628	1.6537e-05	-0.0627586	0.00452949	0.05	5e-05	0.00588834
0.54636	0.0348537	0.00055	0.00055	-0.10699	2.875	2.1875	0	6.2534e-06	-0.00883621	0.00439507	0.05	5e-05	0.0057136
0.54752	0.0348537	0.00055	0.00055	-0.100373	2.875	2.1875	0	-4.02707e-06	-0.00886207	0.00426721	0.05	5e-05	0.00554737
0.54868	0.0348537	0.00055	0.00055	-0.0939861	2.875	2.1875	-9.57089e-14	-1.43095e-05	-0.00885345	0.00414584	0.05	5e-05	0.00538959
0.54984	0.0348537	0.00055	0.00055	-0.0886947	2.875	2.1875	-1.01024	-2.45991e-05	-0.00887931	0.0040309	0.05	5e-05	0.00524017
0.551	0.0348537	0.00055	0.00055	-0.0840322	2.875	2.1875	1.2628	0.000465053	0.422115	0.00392235	0.05	5e-05	0.00509905
0.55216	0.0348537	0.00055	0.00055	-0.079397	2.875	2.1875	-0.252559	0.000329993	-0.116431	0.00360684	0.05	5e-05	0.0046889
0.55332	0.0348537	0.00055	0.00055	-0.0744599	2.875	2.1875	0	0.000320085	-0.00854138	0.00335074	0.05	5e-05	0.00435596
0.55448	0.0348537	0.00055	0.00055	-0.0685897	2.875	2.1875	0	0.000310335	-0.00840517	0.00310053	0.05	5e-05	0.00403068
0.55564	0.0348537	0.00055	0.00055	-0.0627391	2.875	2.1875	0	0.000300739	-0.00827241	0.002856	0.05	5e-05	0.00371281
0.5568	0.0348537	0.00055	0.00055	-0.0579682	2.875	2.1875	0	0.000291291	-0.00814483	0.00261699	0.05	5e-05	0.00340209
0.55796	0.0348537	0.00055	0.00055	-0.0539659	2.875	2.1875	0	0.000281988	-0.00801983	0.0023833	0.05	5e-05	0.00309829
0.55912	0.0348537	0.00055	0.00055	-0.0500709	2.875	2.1875	0.12628	0.000272824	-0.0079	0.00215476	0.05	5e-05	0.00280119
0.56028	0.0348537	0.00055	0.00055	-0.0456288	2.875	2.1875	-0.378839	0.000201301	-0.0616578	0.0019312	0.05	5e-05	0.00251056
0.56144	0.0348537	0.00055	0.00055	-0.0406544	2.875	2.1875	0.252559	0.000317361	0.100052	0.0017391	0.05	5e-05	0.00226083
0.5626	0.0348537	0.00055	0.00055	-0.0344631	2.875	2.1875	0	0.000308589	-0.00756207	0.00149835	0.05	5e-05	0.00194786
0.56376	0.0348537	0.00055	0.00055	-0.028494	2.875	2.1875	0.12628	0.000299969	-0.00743103	0.00126209	0.05	5e-05	0.00164071
0.56492	0.0348537	0.00055	0.00055	-0.0244294	2.875	2.1875	-0.12628	0.000229004	-0.0611767	0.00103013	0.05	5e-05	0.00133916
0.56608	0.0348537	0.00055	0.00055	-0.0202086	2.875	2.1875	0.12628	0.000220647	-0.00720431	0.000828948	0.05	5e-05	0.00107763
0.56724	0.0348537	0.00055	0.00055	-0.0155977	2.875	2.1875	0.12628	0.000149904	-0.0609853	0.000631747	0.05	5e-05	0.00082127
0.5684	0.0348537	0.00055	0.00055	-0.0103153	2.875	2.1875	-0.12628	1.67414e-05	-0.114831	0.000465038	0.05	5e-05	0.00060455
0.56956	0.0348537	0.00055	0.00055	-0.0040974	2.875	2.1875	-0.12628	-5.39186e-05	-0.0608621	0.000355389	0.05	5e-05	0.000462005
0.57072	0.0348537	0.00055	0.00055	0.00225725	2.875	2.1875	0	-6.21112e-05	-0.00706897	0.000276035	0.05	5e-05	0.000358846
0.57188	0.0348537	0.00055	0.00055	0.00736867	2.875	2.1875	0	-7.03345e-05	-0.00706897	0.000200316	0.05	5e-05	0.000260411
0.57304	0.0348537	0.00055	0.00055	0.0121418	2.875	2.1875	0.12628	-7.85926e-05	-0.00715517	0.000128195	0.05	5e-05	0.000166653
0.5742	0.0348537	0.00055	0.00055	0.0173505	2.875	2.1875	-0.12628	-0.000149384	-0.0610207	5.96779e-05	0.05	5e-05	7.75813e-05
0.57536	0.0348537	0.00055	0.00055	0.0232528	2.875	2.1875	0	-0.000157755	-0.00721638	2.13889e-05	0.05	5e-05	2.78056e-05
0.57652	0.0348537	0.00055	0.00055	0.0302847	2.875	2.1875	-0.12628	-0.000166204	-0.00728362	-1.33182e-05	0.05	5e-05	-1.73137e-05
0.57768	0.0348537	0.00055	0.00055	0.0372985	2.875	2.1875	0.252559	-0.000112241	0.0465198	-4.44273e-05	0.05	5e-05	-5.77555e-05
0.57884	0.0348537	0.00055	0.00055	0.0433296	2.875	2.1875	0.505119	-0.000183322	-0.0612767	-9.85806e-05	0.05	5e-05	-0.000128155
0.58	0.0348537	0.00055	0.00055	0.0484171	2.875	2.1875	-0.378839	-0.00050447	-0.276852	-0.000122457	0.05	5e-05	-0.000159195
0.58116	0.0348537	0.00055	0.00055	0.0534185	2.875	2.1875	-0.378839	-0.000638386	-0.115445	-9.38451e-06	0.05	5e-05	-1.21999e-05
0.58232	0.0348537	0.00055	0.00055	0.058888	2.875	2.1875	-0.757678	-0.000585135	0.045906	0.000160816	0.05	5e-05	0.000209061
0.58348	0.0348537	0.00055	0.00055	0.0652855	2.875	2.1875	1.01024	-0.000157208	0.368903	0.000308378	0.05	5e-05	0.000400891
0.58464	0.0348537	0.00055	0.00055	0.0714628	2.875	2.1875	-0.12628	-0.000229313	-0.0621595	0.000273527	0.05	5e-05	0.000355585
0.5858	0.0348537	0.00055	0.00055	0.0795326	2.875	2.1875	0	-0.000239037	-0.00838276	0.000269573	0.05	5e-05	0.000350445
0.58696	0.0348537	0.00055	0.00055	0.0869969	2.875	2.1875	0	-0.000248879	-0.00848448	0.000269902	0.05	5e-05	0.000350872
0.58812	0.0348537	0.00055	0.00055	0.0943762	2.875	2.1875	0	-0.000258844	-0.00859052	0.000274562	0.05	5e-05	0.000356931
0.58928	0.0348537	0.00055	0.00055	0.102226	2.875	2.1875	0.12628	-0.000268938	-0.00870172	0.00028361	0.05	5e-05	0.000368694
0.59044	0.0348537	0.00124009	0.000678329	0.110829	2.875	2.1875	0	-0.000341659	-0.0626905	0.000297105	0.110443	0.000178329	0.000386237
0.5916	0.0354397	0.00126491	0.000678329	0.120272	2.875	2.1875	0.505119	-0.000414549	-0.0628362	0.000341772	0.119828	0.000178329	0.000444303
0.59276	0.0348537	0.00128994	0.000678329	0.129866	2.875	2.1875	-0.505119	-0.00073762	-0.278509	0.000417704	0.129323	0.000178329	0.000543015
0.59392	0.0338283	0.0013046	0.000678329	0.138535	2.875	2.1875	-0.883957	-0.000811081	-0.0633284	0.000631674	0.137714	0.000178329	0.000821177
0.59508	0.0348537	0.00131194	0.000678329	0.145526	2.875	2.1875	0.883957	-0.000447483	0.313447	0.000877297	0.144386	0.000178329	0.00114049
0.59624	0.0347072	0.00132222	0.000678329	0.152894	2.875	2.1875	-0.12628	-0.000521565	-0.0638638	0.000968234	0.151635	0.000178329	0.0012587
0.5974	0.0352932	0.00133998	0.000678329	0.160874	2.875	2.1875	0.505119	-0.000533412	-0.0102129	0.00109126	0.159456	0.000178329	0.00141863
0.59856	0.0341213	0.0013613	0.000678329	0.16966	2.875	2.1875	-1.01024	-0.0007955	-0.225938	0.00121987	0.168075	0.000178329	0.00158583
0.59972	0.0348537	0.00138226	0.000678329	0.17845	2.875	2.1875	0.631398	-0.000558028	0.204717	0.0014609	0.17655	0.000178329	0.00189917
0.60088	0.0345607	0.00139261	0.000678329	0.186439	2.875	2.1875	-0.252559	-0.000633303	-0.0648922	0.00160135	0.184357	0.000178329	0.00208175
0.60204	0.0335354	0.00139477	0.000678329	0.193698	2.875	2.1875	-0.883957	-0.000583902	0.0425871	0.0017747	0.191391	0.000178329	0.00230711
0.6032	0.0342678	0.0013993	0.000678329	0.201062	2.875	2.1875	0.631398	-9.73318e-05	0.419484	0.00192785	0.198556	0.000178329	0.00250621
0.60436	0.0350002	0.00140954	0.000672661	0.208421	2.875	2.1875	0.631398	7.67197e-05	0.15	0.00187436	0.205985	0.000172661	0.00243667
0.60552	0.0347072	0.00143033	0.000669867	0.21977	2.875	2.1875	-0.252559	-6.1662e-05	-0.11931	0.00174757	0.217498	0.000169867	0.00227183
0.60668	0.0347072	0.00145109	0.000666924	0.23117	2.875	2.1875	0	-7.50858e-05	-0.0115517	0.00168068	0.228985	0.000166924	0.00218488
0.60784	0.0348537	0.00147396	0.000667154	0.242296	2.875	2.1875	0.12628	-8.85467e-05	-0.0115517	0.00162034	0.24019	0.000167154	0.00210644
0.609	0.0348537	0.00148808	0.000658475	0.252796	2.875	2.1875	0	-0.000164546	-0.0655569	0.00156652	0.25076	0.000158475	0.00203648
0.61016	0.0347072	0.00150341	0.000650246	0.263709	2.875	2.1875	-0.12628	-0.000240626	-0.0655862	0.00154592	0.261699	0.000150246	0.0020097
0.61132	0.0348537	0.0015251	0.0006479	0.275318	2.875	2.1875	0.12628	-0.000254331	-0.0118147	0.00155855	0.273292	0.0001479	0.00202611
0.61248	0.0338283	0.00155679	0.00065506	0.287915	2.875	2.1875	-0.883957	-0.000330657	-0.0657983	0.00157779	0.285864	0.00015506	0.00205112
0.61364	0.0347072	0.00158701	0.000661159	0.30023	2.875	2.1875	0.757678	3.03138e-05	0.31117	0.00163037	0.29811	0.000161159	0.00211948
0.6148	0.0348537	0.00161789	0.000667407	0.312808	2.875	2.1875	0.12628	1.63341e-05	-0.012069	0.00152977	0.310819	0.000167407	0.0019887
0.61596	0.0350002	0.00164039	0.000665047	0.324819	2.875	2.1875	0.12628	-6.01318e-05	-0.0658621	0.0014359	0.322953	0.000165047	0.00186667
0.61712	0.0347072	0.00165634	0.000659517	0.334919	2.875	2.1875	-0.252559	-0.000199122	-0.119847	0.00137533	0.333131	0.000159517	0.00178793
0.61828	0.0350002	0.00167629	0.000658061	0.345311	2.875	2.1875	0.252559	-0.000213222	-0.0121552	0.00137475	0.343524	0.000158061	0.00178718
0.61944	0.0335354	0.00170451	0.000665513	0.356085	2.875	2.1875	-1.2628	-0.000352416	-0.119995	0.00138087	0.35429	0.000165513	0.00179513
0.6206	0.0348537	0.00173013	0.000671002	0.366392	2.875	2.1875	1.13652	0.000133158	0.418598	0.00144706	0.364511	0.000171002	0.00188118
0.62176	0.0347072	0.00175557	0.000676344	0.376674	2.875	2.1875	-0.12628	5.63499e-05	-0.0662569	0.0013068	0.374976	0.000176344	0.00169884
0.62292	0.0350002	0.00177331	0.000673686	0.386469	2.875	2.1875	0.252559	4.20638e-05	-0.0122414	0.00119998	0.384909	0.000173686	0.00155998
0.62408	0.0348537	0.00178485	0.000664237	0.396024	2.875	2.1875	-0.12628	-9.71899e-05	-0.120086	0.00109981	0.394594	0.000164237	0.00142976
0.62524	0.0348537	0.00179896	0.000657356	0.405784	2.875	2.1875	0	-0.000173998	-0.0662052	0.00105962	0.404406	0.000157356	0.0013775
0.6264	0.0347072	0.00182018	0.000657569	0.416109	2.875	2.1875	-0.12628	-0.000250891	-0.0662871	0.00105271	0.41474	0.000157569	0.00136853
0.62756	0.0355861	0.00184007	0.000655815	0.426589	2.875	2.1875	0.757678	-0.000265415	-0.0125207	0.00107913	0.425186	0.000155815	0.00140287
0.62872	0.0344143	0.00185954	0.000653301	0.437175	2.875	2.1875	-1.01024	-0.000655035	-0.335879	0.00111228	0.435729	0.000153301	0.00144597
0.62988	0.03251	0.00188433	0.000655767	0.448325	2.875	2.1875	-1.64164	-0.000545026	0.0948353	0.00131221	0.446619	0.000155767	0.00170587
0.63104	0.0350002	0.00190209	0.000651129	0.458945	2.875	2.1875	2.14675	0.000377138	0.794969	0.00146584	0.45704	0.000151129	0.0019056
0.6322	0.0347072	0.00192156	0.000648146	0.46973	2.875	2.1875	-0.252559	0.000237088	-0.120733	0.00122679	0.468135	0.000148146	0.00159483
0.63336	0.0350002	0.0019467	0.000650743	0.480994	2.875	2.1875	0.252559	0.000222143	-0.0128836	0.00104809	0.479631	0.000150743	0.00136252
0.63452	0.0348537	0.00196936	0.00065137	0.491851	2.875	2.1875	-0.12628	8.23191e-05	-0.120554	0.000876286	0.490712	0.00015137	0.00113917
0.63568	0.0347072	0.00199166	0.000651235	0.502848	2.875	2.1875	-0.12628	5.03065e-06	-0.0666121	0.000764576	0.501854	0.000151235	0.000993949
0.63684	0.0345607	0.00201875	0.000655775	0.514268	2.875	2.1875	-0.12628	-9.76114e-06	-0.01275	0.00068621	0.513376	0.000155775	0.000892073
0.638	0.0347072	0.00203765	0.000652609	0.524847	2.875	2.1875	0.12628	3.79365e-05	0.0410862	0.000614493	0.524049	0.000152609	0.000798841
0.63916	0.0347072	0.0020517	0.000647473	0.533857	2.875	2.1875	0	2.31586e-05	-0.0126724	0.000522747	0.533178	0.000147473	0.000679572
0.64032	0.0348537	0.00207118	0.000647615	0.543353	2.875	2.1875	0.12628	8.39222e-06	-0.0127672	0.000437532	0.542785	0.000147615	0.000568791
0.64148	0.0345607	0.00208732	0.000644879	0.552403	2.875	2.1875	-0.252559	-6.88642e-05	-0.0666293	0.000358851	0.551937	0.000144879	0.000466507
0.64264	0.0347072	0.00210166	0.000640774	0.56113	2.875	2.1875	0.12628	-2.11663e-05	0.0411207	0.000313322	0.560723	0.000140774	0.000407319
0.6438	0.0348537	0.00212055	0.000640735	0.57041	2.875	2.1875	0.12628	-3.59731e-05	-0.0127586	0.000247598	0.570089	0.000140735	0.000321877
0.64496	0.0348537	0.0021325	0.000633888	0.579097	2.875	2.1875	0	-0.000113292	-0.066631	0.00018831	0.578852	0.000133888	0.000244804
0.64612	0.0347072	0.00213844	0.000621136	0.587266	2.875	2.1875	-0.12628	-0.000190667	-0.0667026	0.000162091	0.587055	0.000121136	0.000210718
0.64728	0.0348537	0.00214864	0.00061244	0.595853	2.875	2.1875	0.12628	-0.000205642	-0.0129095	0.000168962	0.595633	0.00011244	0.000219651
0.64844	0.0348537	0.00216733	0.000611723	0.605319	2.875	2.1875	0	-0.000283213	-0.0668716	0.000182305	0.605082	0.000111723	0.000236997
0.6496	0.0347072	0.00218305	0.000608412	0.614393	2.875	2.1875	-0.12628	-0.000360924	-0.0669922	0.000228833	0.614095	0.000108412	0.000297483
0.65076	0.0345607	0.00219791	0.000604318	0.62337	2.875	2.1875	-0.12628	-0.00037632	-0.0132724	0.000308627	0.622969	0.000104318	0.000401216
0.65192	0.0345607	0.00221977	0.000607292	0.632872	2.875	2.1875	0	-0.000329407	0.0404422	0.000395143	0.632359	0.000107292	0.000513686
0.65308	0.037051	0.00223537	0.000604046	0.64186	2.875	2.1875	2.14675	-0.000282658	0.0403009	0.00046184	0.641259	0.000104046	0.000600391
0.65424	0.0345607	0.00225285	0.000602432	0.651102	2.875	2.1875	-2.14675	-0.00129845	-0.875683	0.00050882	0.650441	0.000102432	0.000661467
0.6554	0.0348537	0.00227676	0.000607281	0.660836	2.875	2.1875	0.252559	-0.00125248	0.0396267	0.000989418	0.65955	0.000107281	0.00128624
0.65656	0.0347072	0.00229775	0.000609232	0.67033	2.875	2.1875	-0.12628	-0.00133212	-0.068656	0.00145089	0.668444	0.000109232	0.00188616
0.65772	0.0347072	0.00231734	0.000610098	0.679583	2.875	2.1875	0	-0.00134993	-0.0153509	0.00194706	0.677051	0.000110098	0.00253118
0.65888	0.0348537	0.00234278	0.000616828	0.689293	2.875	2.1875	0.12628	-0.00136841	-0.0159259	0.0024518	0.686106	0.000116828	0.00318734
0.66004	0.0348537	0.00236231	0.000617342	0.698665	2.875	2.1875	0	-0.00145005	-0.0703845	0.00296562	0.69481	0.000117342	0.00385531
0.6612	0.0345607	0.00237836	0.000613151	0.708266	2.875	2.1875	-0.252559	-0.00153241	-0.0710026	0.00351575	0.703696	0.000113151	0.00457047
0.66236	0.0348537	0.00239969	0.000613918	0.718416	2.875	2.1875	0.252559	-0.00149055	0.0360914	0.00410275	0.713083	0.000113918	0.00533358
0.66352	0.0328029	0.00241696	0.000610582	0.72826	2.875	2.1875	-1.76791	-0.00157441	-0.0722922	0.00467393	0.722184	0.000110582	0.00607611
0.66468	0.0347072	0.00243288	0.000605558	0.73814	2.875	2.1875	1.64164	-0.000784127	0.681276	0.00528319	0.731272	0.000105558	0.00686815
0.66584	0.0347072	0.0024538	0.000605791	0.748311	2.875	2.1875	0	-0.000806659	-0.0194241	0.00555791	0.741086	0.000105791	0.00722529
0.667	0.0347072	0.00248277	0.000606751	0.762128	2.875	2.1875	0	-0.000829591	-0.019769	0.005845	0.754529	0.000106751	0.0075985
0.66816	0.0333889	0.0025074	0.000602999	0.77576	2.875	2.1875	-1.13652	-0.000852933	-0.0201224	0.00614476	0.767772	0.000102999	0.00798819
0.66932	0.0345607	0.00253618	0.000602993	0.78988	2.875	2.1875	1.01024	-0.00031425	0.464382	0.00645753	0.781485	0.000102993	0.00839478
0.67048	0.0348537	0.00255914	0.000597369	0.803461	2.875	2.1875	0.252559	-0.000275675	0.0332543	0.00654367	0.794955	9.73685e-05	0.00850677
0.67164	0.0338283	0.00257931	0.000589747	0.8165	2.875	2.1875	-0.883957	-0.000362226	-0.0746129	0.00661659	0.807899	8.97474e-05	0.00860156
0.6728	0.0342678	0.00260367	0.000586469	0.829798	2.875	2.1875	0.378839	-1.14962e-05	0.30235	0.00672971	0.821049	8.6469e-05	0.00874862
0.67396	0.0348537	0.00263522	0.000590552	0.843599	2.875	2.1875	0.505119	0.000151745	0.140728	0.00669653	0.834893	9.05523e-05	0.00870549
0.67512	0.0347072	0.00266101	0.000589313	0.856763	2.875	2.1875	-0.12628	6.50848e-05	-0.074694	0.00659702	0.848187	8.9313e-05	0.00857613
0.67628	0.0347072	0.00268951	0.000590906	0.870088	2.875	2.1875	0	4.09508e-05	-0.0207759	0.00653775	0.861589	9.0906e-05	0.00849907
0.67744	0.0348537	0.00271348	0.000586875	0.883507	2.875	2.1875	0.12628	1.68371e-05	-0.0208621	0.00649198	0.875068	8.68746e-05	0.00843958
0.6786	0.0348537	0.00273353	0.000579029	0.896577	2.875	2.1875	0	-6.97624e-05	-0.0746552	0.00645976	0.888179	7.9029e-05	0.00839769
0.67976	0.0351467	0.00275692	0.000574917	0.90975	2.875	2.1875	0.252559	-0.000156397	-0.0746526	0.00646768	0.901342	7.49168e-05	0.00840798
0.68092	0.0344143	0.00278821	0.000578463	0.923637	2.875	2.1875	-0.631398	-0.000368096	-0.182499	0.00651574	0.915166	7.84626e-05	0.00847047
0.68208	0.0348537	0.0028135	0.000576378	0.936904	2.875	2.1875	0.378839	-0.000267507	0.0867147	0.00665735	0.928249	7.63779e-05	0.00865455
0.68324	0.0347072	0.00283492	0.000570776	0.949723	2.875	2.1875	-0.12628	-0.000354533	-0.0750224	0.00675934	0.940936	7.07758e-05	0.00878714
0.6844	0.0347072	0.00286216	0.000564976	0.965476	2.875	2.1875	0	-0.000379241	-0.0213	0.00690179	0.956503	6.49763e-05	0.00897233
0.68556	0.0345607	0.00288495	0.00055505	0.980747	2.875	2.1875	-0.12628	-0.000404136	-0.0214612	0.00705821	0.971571	5.50498e-05	0.00917567
0.68672	0.0347072	0.00290663	0.000545522	0.995309	2.875	2.1875	0.12628	-0.000366736	0.0322414	0.00722874	0.985912	4.55222e-05	0.00939736
0.68788	0.0347072	0.00293415	0.000542732	1.00996	2.875	2.1875	0	-0.000392013	-0.0217905	0.00738689	1.00036	4.27319e-05	0.00960296
0.68904	0.0348537	0.00297177	0.000543657	1.02804	2.875	2.1875	0.12628	-0.000417483	-0.0219569	0.00755948	1.01821	4.3657e-05	0.00982733
0.6902	0.0347072	0.00300469	0.000540445	1.04551	2.875	2.1875	-0.12628	-0.000505655	-0.0760103	0.00774668	1.03544	4.04445e-05	0.0100707
0.69136	0.0347072	0.00304139	0.000540946	1.06331	2.875	2.1875	0	-0.000531582	-0.0223509	0.00797533	1.05295	4.09463e-05	0.0103679
0.69252	0.0347072	0.00307253	0.000536101	1.08059	2.875	2.1875	0	-0.000557772	-0.0225776	0.00821898	1.0699	3.6101e-05	0.0106847
0.69368	0.0347072	0.00310084	0.000528625	1.09756	2.875	2.1875	0	-0.000584239	-0.0228164	0.00847788	1.08653	2.86246e-05	0.0110212
0.69484	0.0347072	0.00313418	0.000526367	1.11485	2.875	2.1875	0	-0.000610994	-0.0230647	0.00875227	1.10347	2.6367e-05	0.0113779
0.696	0.0347072	0.00317651	0.000533254	1.13277	2.875	2.1875	0	-0.000638052	-0.0233259	0.0090424	1.12102	3.32536e-05	0.0117551
0.69716	0.0348537	0.00321484	0.000535998	1.15045	2.875	2.1875	0.12628	-0.000665426	-0.0235983	0.00934854	1.1383	3.59975e-05	0.0121531
0.69832	0.0352932	0.00325404	0.000539433	1.16827	2.875	2.1875	0.378839	-0.000755623	-0.077756	0.009671	1.1557	3.9433e-05	0.0125723
0.69948	0.0347072	0.00328597	0.00053601	1.18534	2.875	2.1875	-0.505119	-0.00103368	-0.239702	0.0100367	1.1723	3.60102e-05	0.0130477
0.70064	0.0345607	0.00331397	0.000528748	1.20207	2.875	2.1875	-0.12628	-0.00106227	-0.0246448	0.010526	1.18839	2.87482e-05	0.0136838
0.7018	0.0317775	0.0033462	0.000525799	1.2191	2.875	2.1875	-2.39931	-0.00102889	0.0287759	0.0110327	1.20476	2.57988e-05	0.0143426
0.70296	0.0320705	0.003386	0.000530785	1.23657	2.875	2.1875	0.252559	0.000191375	1.05195	0.0115307	1.22158	3.07851e-05	0.0149899
0.70412	0.0350002	0.00342071	0.000531628	1.25326	2.875	2.1875	2.52559	0.00128674	0.944283	0.0115137	1.23829	3.16275e-05	0.0149679
0.70528	0.0345607	0.00345247	0.000529233	1.26982	2.875	2.1875	-0.378839	0.00113286	-0.132656	0.0110352	1.25548	2.92326e-05	0.0143457
0.70644	0.0350002	0.00347553	0.000519068	1.28533	2.875	2.1875	0.378839	0.00116703	0.0294509	0.0106277	1.27151	1.90683e-05	0.013816
0.7076	0.0347072	0.00349325	0.000503848	1.30029	2.875	2.1875	-0.252559	0.00101428	-0.131674	0.0102109	1.28702	3.84803e-06	0.0132742
0.70876	0.0347072	0.00351469	0.000492324	1.31556	2.875	2.1875	0	0.000987031	-0.0234931	0.00986438	1.30273	-7.67604e-06	0.0128237
0.70992	0.0347072	0.00354379	0.000488719	1.33132	2.875	2.1875	0	0.000960268	-0.0230716	0.00953433	1.31892	-1.12809e-05	0.0123946
0.71108	0.0348537	0.00358328	0.00049575	1.3478	2.875	2.1875	0.12628	0.00093398	-0.0226621	0.00922042	1.33581	-4.24978e-06	0.0119866
0.71224	0.0347072	0.00361898	0.000499526	1.36376	2.875	2.1875	-0.12628	0.00084566	-0.0761379	0.00892229	1.35216	-4.73792e-07	0.011599
0.7134	0.0351467	0.00364728	0.000495518	1.3793	2.875	2.1875	0.378839	0.000820253	-0.0219026	0.00866625	1.36803	-4.48188e-06	0.0112661
0.71456	0.0347072	0.00367033	0.00048614	1.39446	2.875	2.1875	-0.378839	0.000607769	-0.183176	0.00842534	1.38351	-1.38596e-05	0.0109529
0.71572	0.0336818	0.00369446	0.000478336	1.40952	2.875	2.1875	-0.883957	0.000583068	-0.021294	0.00827926	1.39876	-2.16643e-05	0.010763
0.71688	0.0347072	0.00372483	0.000477235	1.42487	2.875	2.1875	0.883957	0.000996116	0.356076	0.0081478	1.41428	-2.27649e-05	0.0105921
0.71804	0.0347072	0.00376538	0.000486463	1.44097	2.875	2.1875	0	0.000972196	-0.0206207	0.00784417	1.43077	-1.35373e-05	0.0101974
0.7192	0.0345607	0.00380162	0.000491826	1.45654	2.875	2.1875	-0.12628	0.000948759	-0.0202043	0.00755461	1.44672	-8.17354e-06	0.009821
0.72036	0.0345607	0.00382875	0.000488798	1.4711	2.875	2.1875	0	0.000988284	0.0340733	0.0072788	1.46164	-1.12018e-05	0.00946244
0.72152	0.0348537	0.0038492	0.000479189	1.48509	2.875	2.1875	0.252559	0.0010283	0.0344957	0.00698973	1.476	-2.08112e-05	0.00908664
0.72268	0.0348537	0.00386932	0.000469035	1.49914	2.875	2.1875	0	0.000943834	-0.0728147	0.00668704	1.49045	-3.09654e-05	0.00869315
0.72384	0.0347072	0.00389424	0.000463768	1.51354	2.875	2.1875	-0.12628	0.000859837	-0.0724112	0.0064237	1.50519	-3.62324e-05	0.00835081
0.725	0.0348537	0.00392883	0.000468218	1.52867	2.875	2.1875	0.12628	0.000838759	-0.0181707	0.00619937	1.52062	-3.17821e-05	0.00805918
0.72616	0.0347072	0.003961	0.000470306	1.5436	2.875	2.1875	-0.12628	0.000755602	-0.0716871	0.0059871	1.53582	-2.96943e-05	0.00778324
0.72732	0.0347072	0.00398989	0.000469428	1.55813	2.875	2.1875	0	0.000735313	-0.0174905	0.00581328	1.55058	-3.05721e-05	0.00755726
0.72848	0.0347072	0.00401065	0.000460751	1.5719	2.875	2.1875	0	0.000715388	-0.0171767	0.00565098	1.56455	-3.9249e-05	0.00734628
0.72964	0.0352932	0.00402633	0.000447291	1.58513	2.875	2.1875	0.505119	0.000695817	-0.0168716	0.00549999	1.57798	-5.27085e-05	0.00714998
0.7308	0.0350002	0.00404599	0.000437802	1.59869	2.875	2.1875	-0.252559	0.000426614	-0.232072	0.00536006	1.59172	-6.21978e-05	0.00696808
0.73196	0.0348537	0.00407388	0.000436809	1.61278	2.875	2.1875	-0.12628	0.00028261	-0.124141	0.00533764	1.60584	-6.31908e-05	0.00693893
0.73312	0.0347072	0.00411302	0.000447333	1.62765	2.875	2.1875	-0.12628	0.000201241	-0.0701457	0.00537929	1.62066	-5.26673e-05	0.00699308
0.73428	0.0351467	0.00414925	0.000455181	1.64219	2.875	2.1875	0.378839	0.000182465	-0.0161862	0.00545832	1.63509	-4.48188e-05	0.00709582
0.73544	0.0326565	0.00417562	0.000454015	1.65561	2.875	2.1875	-2.14675	-2.37037e-05	-0.177728	0.00554806	1.6484	-4.59846e-05	0.00721248
0.7366	0.0350002	0.00419488	0.000446553	1.66813	2.875	2.1875	2.02047	0.000832518	0.738119	0.00572851	1.66068	-5.34467e-05	0.00744706
0.73776	0.0348537	0.00421699	0.000442155	1.68079	2.875	2.1875	-0.12628	0.000689244	-0.123512	0.0055465	1.67358	-5.7845e-05	0.00721045
0.73892	0.0347072	0.00424681	0.000445349	1.69411	2.875	2.1875	-0.12628	0.000608806	-0.0693431	0.00542836	1.68705	-5.46511e-05	0.00705687
0.74008	0.0342678	0.00428677	0.000459157	1.70802	2.875	2.1875	-0.378839	0.000591163	-0.0152095	0.00534723	1.70107	-4.08426e-05	0.00695139
0.74124	0.0347072	0.00432328	0.000470297	1.72135	2.875	2.1875	0.378839	0.000761295	0.146666	0.00527626	1.71449	-2.97033e-05	0.00685914
0.7424	0.0348537	0.0043446	0.000469711	1.73205	2.875	2.1875	0.12628	0.000744321	-0.0146328	0.00513533	1.72537	-3.02892e-05	0.00667593
0.74356	0.0347072	0.00435827	0.00046193	1.74196	2.875	2.1875	-0.12628	0.000665222	-0.0681888	0.00500418	1.73546	-3.80699e-05	0.00650543
0.74472	0.0336818	0.00437278	0.000455408	1.75176	2.875	2.1875	-0.883957	0.000648945	-0.0140319	0.00490925	1.74538	-4.45915e-05	0.00638203
0.74588	0.0347072	0.00439385	0.000455882	1.76191	2.875	2.1875	0.883957	0.00107045	0.363366	0.0048237	1.75564	-4.41184e-05	0.00627081
0.74704	0.0348537	0.00442604	0.000466974	1.77313	2.875	2.1875	0.12628	0.00105502	-0.0132974	0.00456071	1.7672	-3.30256e-05	0.00592892
0.7482	0.0345607	0.00445576	0.000475704	1.78412	2.875	2.1875	-0.252559	0.000977628	-0.0667216	0.00430655	1.77852	-2.4296e-05	0.00559852
0.74936	0.0350002	0.00447096	0.000469691	1.79405	2.875	2.1875	0.378839	0.0010257	0.0414431	0.00408755	1.78874	-3.03095e-05	0.00531381
0.75052	0.0347072	0.00447828	0.000455878	1.80333	2.875	2.1875	-0.252559	0.000886802	-0.119741	0.00385006	1.79833	-4.41219e-05	0.00500507
0.75168	0.0347072	0.00448436	0.000441207	1.81236	2.875	2.1875	0	0.00087333	-0.0116138	0.00367373	1.80759	-5.87926e-05	0.00477585
0.75284	0.0347072	0.00449466	0.00043141	1.82145	2.875	2.1875	0	0.000860289	-0.0112422	0.00350497	1.8169	-6.859e-05	0.00455646
0.754	0.0348537	0.00451462	0.000431616	1.83116	2.875	2.1875	0.12628	0.000847674	-0.010875	0.0033435	1.82681	-6.83839e-05	0.00434656
0.75516	0.0351467	0.00454695	0.000444242	1.84182	2.875	2.1875	0.252559	0.000772985	-0.0643871	0.00318908	1.83767	-5.57578e-05	0.0041458
0.75632	0.0350002	0.0045651	0.000443922	1.85086	2.875	2.1875	-0.12628	0.000573689	-0.171807	0.00306809	1.84687	-5.60781e-05	0.00398852
0.75748	0.0348537	0.00457361	0.000435186	1.85863	2.875	2.1875	-0.12628	0.000437172	-0.117687	0.00303365	1.85468	-6.48141e-05	0.00394375
0.75864	0.0347072	0.00458002	0.000424675	1.86611	2.875	2.1875	-0.12628	0.000363365	-0.0636267	0.00305896	1.86213	-7.53249e-05	0.00397664
0.7598	0.0347072	0.00458949	0.000417519	1.8737	2.875	2.1875	0	0.000352232	-0.00959741	0.00311726	1.86965	-8.24807e-05	0.00405244
0.76096	0.0347072	0.00460685	0.00041885	1.88167	2.875	2.1875	0	0.000341274	-0.00944655	0.00318186	1.87753	-8.11503e-05	0.00413642
0.76212	0.0348537	0.00463603	0.000432292	1.89045	2.875	2.1875	0.12628	0.000330484	-0.00930172	0.0032527	1.88622	-6.77082e-05	0.00422852
0.76328	0.0348537	0.00466255	0.000443052	1.89902	2.875	2.1875	0	0.000257364	-0.0630345	0.00332976	1.8947	-5.69485e-05	0.00432869
0.76444	0.0348537	0.00467312	0.00043875	1.90599	2.875	2.1875	0	0.000184371	-0.062925	0.00343967	1.90152	-6.12502e-05	0.00447157
0.7656	0.0348537	0.00467593	0.000429655	1.91111	2.875	2.1875	-1.19636e-14	0.00011147	-0.0628457	0.00358241	1.90645	-7.03454e-05	0.00465714
0.76676	0.0347072	0.00468092	0.000422708	1.91642	2.875	2.1875	-0.12628	3.86235e-05	-0.062819	0.00375803	1.91153	-7.72915e-05	0.00488544
0.76792	0.0347072	0.00469234	0.000422741	1.92201	2.875	2.1875	0	2.82904e-05	-0.00887931	0.0039666	1.91685	-7.7259e-05	0.00515658
0.76908	0.0348537	0.00471411	0.000433377	1.92831	2.875	2.1875	0.12628	1.79714e-05	-0.00887931	0.00418153	1.92287	-6.66232e-05	0.00543598
0.77024	0.0341213	0.00474866	0.000447372	1.93949	2.875	2.1875	-0.631398	-5.4833e-05	-0.0627586	0.00440291	1.93377	-5.26282e-05	0.00572379
0.7714	0.0347072	0.00476792	0.00044661	1.94926	2.875	2.1875	0.505119	0.000184807	0.206558	0.00465754	1.9432	-5.33903e-05	0.0060548
0.77256	0.0348537	0.00477824	0.000437433	1.9581	2.875	2.1875	0.12628	0.000174561	-0.00883276	0.00481225	1.95185	-6.25668e-05	0.00625592
0.77372	0.0348537	0.00478809	0.000428597	1.96657	2.875	2.1875	0	0.000101907	-0.0626328	0.00497371	1.96011	-7.14026e-05	0.00646582
0.77488	0.0338283	0.0048038	0.000426139	1.9753	2.875	2.1875	-0.883957	2.93038e-05	-0.0625922	0.00516863	1.96858	-7.3861e-05	0.00671922
0.77604	0.0345607	0.00482872	0.000433681	1.98442	2.875	2.1875	0.631398	0.000394175	0.314547	0.00539708	1.9774	-6.63185e-05	0.00701621
0.7772	0.0348537	0.00486557	0.000453947	1.99415	2.875	2.1875	0.252559	0.000446769	0.0453397	0.00547254	1.98703	-4.6053e-05	0.0071143
0.77836	0.0348537	0.00488749	0.000459761	2.00251	2.875	2.1875	0	0.000374597	-0.0622172	0.00552827	1.99532	-4.02392e-05	0.00718675
0.77952	0.0348537	0.00489993	0.000456562	2.00992	2.875	2.1875	0	0.00030261	-0.0620578	0.00561752	2.00262	-4.34375e-05	0.00730278
0.78068	0.0347072	0.00491104	0.000452506	2.01705	2.875	2.1875	-0.12628	0.000230772	-0.0619293	0.00574027	2.00959	-4.74938e-05	0.00746235
0.78184	0.0348537	0.00492688	0.000453329	2.02448	2.875	2.1875	0.12628	0.000221543	-0.00795603	0.00589651	2.01681	-4.66712e-05	0.00766546
0.783	0.0345607	0.00495319	0.000463864	2.03305	2.875	2.1875	-0.252559	0.000149929	-0.0617362	0.0060596	2.02517	-3.61363e-05	0.00787748
0.78416	0.0347072	0.0049918	0.000487741	2.04215	2.875	2.1875	0.12628	0.000203379	0.0460776	0.00625624	2.03402	-1.22592e-05	0.00813311
0.78532	0.0347072	0.00501462	0.000496881	2.04959	2.875	2.1875	0	0.000194434	-0.00771121	0.00643317	2.04122	-3.11938e-06	0.00836313
0.78648	0.0347072	0.0050226	0.000491288	2.0558	2.875	2.1875	0	0.000185586	-0.00762759	0.00661711	2.0472	-8.71218e-06	0.00860224
0.78764	0.0347072	0.0050287	0.000483646	2.06194	2.875	2.1875	0	0.000176829	-0.00754914	0.00680809	2.05309	-1.63541e-05	0.00885052
0.7888	0.0347072	0.00503748	0.000479086	2.06813	2.875	2.1875	-4.78544e-14	0.00016816	-0.00747328	0.00700618	2.05902	-2.09139e-05	0.00910804
0.78996	0.0341213	0.00505406	0.000483043	2.07463	2.875	2.1875	-0.505119	0.000159575	-0.00740086	0.00721144	2.06526	-1.6957e-05	0.00937487
0.79112	0.0347072	0.00508208	0.000499143	2.08175	2.875	2.1875	0.505119	0.000401045	0.208164	0.00742392	2.0721	-8.56619e-07	0.0096511
0.79228	0.0348537	0.00511007	0.000509876	2.09106	2.875	2.1875	0.12628	0.000392736	-0.00716293	0.00753707	2.08126	9.87592e-06	0.00979819
0.79344	0.0348537	0.00512235	0.000505278	2.09898	2.875	2.1875	0	0.000322128	-0.060869	0.00765749	2.08903	5.27811e-06	0.00995473
0.7946	0.0344143	0.00513101	0.000497128	2.10658	2.875	2.1875	-0.378839	0.00025168	-0.060731	0.00781182	2.09643	-2.87216e-06	0.0101554
0.79576	0.0347072	0.00514147	0.000490858	2.1143	2.875	2.1875	0.252559	0.000368838	0.100998	0.00800007	2.1039	-9.14192e-06	0.0104001
0.79692	0.0310451	0.00515798	0.000491601	2.12209	2.875	2.1875	-3.15699	0.000361191	-0.00659224	0.0081423	2.11151	-8.39934e-06	0.010585
0.79808	0.0347072	0.00518538	0.000504491	2.13023	2.875	2.1875	3.15699	0.00191608	1.34042	0.00829182	2.11945	4.49089e-06	0.0107794
0.79924	0.0347072	0.00521371	0.000518057	2.13854	2.875	2.1875	0	0.00190956	-0.00562069	0.00778208	2.12842	1.8057e-05	0.0101167
0.8004	0.0348537	0.00522668	0.000516599	2.1455	2.875	2.1875	0.12628	0.00190398	-0.00480603	0.00727898	2.13604	1.6599e-05	0.00946268
0.80156	0.0347072	0.00523546	0.000511896	2.15175	2.875	2.1875	-0.12628	0.00183685	-0.057869	0.00678186	2.14293	1.18961e-05	0.00881642
0.80272	0.0347072	0.00524611	0.000509383	2.15801	2.875	2.1875	0	0.00183313	-0.00321034	0.00631674	2.1498	9.38308e-06	0.00821176
0.80388	0.0350002	0.00526437	0.000514496	2.16486	2.875	2.1875	0.252559	0.00183031	-0.00242845	0.00585633	2.15725	1.44957e-05	0.00761323
0.80504	0.0347072	0.00529357	0.000530559	2.17257	2.875	2.1875	-0.252559	0.00170341	-0.109396	0.00540002	2.16555	3.05591e-05	0.00702003
0.8062	0.0348537	0.00532436	0.000547915	2.18052	2.875	2.1875	0.12628	0.00170235	-0.000921552	0.00500052	2.17402	4.79154e-05	0.00650068
0.80736	0.0347072	0.00534044	0.000550866	2.1872	2.875	2.1875	-0.12628	0.00163963	-0.0540681	0.00460395	2.18121	5.08663e-05	0.00598514
0.80852	0.0348537	0.00534878	0.000547267	2.19277	2.875	2.1875	0.12628	0.00164021	0.00050431	0.00423642	2.18726	4.72668e-05	0.00550735
0.80968	0.0345607	0.00535722	0.00054376	2.19836	2.875	2.1875	-0.252559	0.00157911	-0.052669	0.00387074	2.19333	4.37603e-05	0.00503196
0.81084	0.0332424	0.00537182	0.000546688	2.20431	2.875	2.1875	-1.13652	0.00164379	0.0557526	0.00353303	2.19972	4.66882e-05	0.00459294
0.812	0.0347072	0.00539771	0.000560583	2.21129	2.875	2.1875	1.2628	0.00227172	0.541322	0.00316949	2.20717	6.05828e-05	0.00412033
0.81316	0.0348537	0.00542373	0.000574879	2.21817	2.875	2.1875	0.12628	0.00227584	0.00354914	0.00253961	2.21487	7.4879e-05	0.0033015
0.81432	0.0345607	0.0054351	0.000574783	2.22379	2.875	2.1875	-0.252559	0.00221859	-0.0493543	0.00190924	2.2213	7.47833e-05	0.00248202
0.81548	0.0348537	0.00543575	0.000564524	2.22833	2.875	2.1875	0.252559	0.00228742	0.0593405	0.00130424	2.22663	6.45242e-05	0.00169551
0.81664	0.0338283	0.00543594	0.000554065	2.23273	2.875	2.1875	-0.883957	0.0022324	-0.0474319	0.000670517	2.23186	5.40646e-05	0.000871672
0.8178	0.0348537	0.00544021	0.000548534	2.23711	2.875	2.1875	0.883957	0.00261594	0.330641	6.0599e-05	2.23703	4.85343e-05	7.87787e-05
0.81896	0.0347072	0.0054546	0.000553669	2.24205	2.875	2.1875	-0.12628	0.00256332	-0.0453638	-0.000712919	2.24298	5.36694e-05	-0.000926795
0.82012	0.0347072	0.00548184	0.000565848	2.2504	2.875	2.1875	0	0.00257446	0.00960431	-0.00146434	2.2523	6.58481e-05	-0.00190364
0.82128	0.0351467	0.00550049	0.000567557	2.25884	2.875	2.1875	0.378839	0.00258688	0.0107026	-0.00222124	2.26173	6.75569e-05	-0.00288761
0.82244	0.0348537	0.00550694	0.000557589	2.26612	2.875	2.1875	-0.252559	0.00241309	-0.149817	-0.00298453	2.27	5.75887e-05	-0.00387989
0.8236	0.0347072	0.00551206	0.000546208	2.27332	2.875	2.1875	-0.12628	0.00236549	-0.0410379	-0.00367516	2.2781	4.62082e-05	-0.00477771
0.82476	0.0345607	0.0055201	0.000538243	2.28054	2.875	2.1875	-0.12628	0.00238155	0.0138448	-0.0043473	2.28619	3.82428e-05	-0.00565149
0.82592	0.0347072	0.00553678	0.000538824	2.28849	2.875	2.1875	0.12628	0.00246128	0.0687353	-0.00502844	2.29503	3.88235e-05	-0.00653697
0.82708	0.0345607	0.00556575	0.000552179	2.2972	2.875	2.1875	-0.12628	0.00247974	0.0159103	-0.00574609	2.30467	5.21793e-05	-0.00746991
0.82824	0.0345607	0.00559553	0.000565933	2.30615	2.875	2.1875	0	0.00256191	0.0708431	-0.00647445	2.31456	6.59326e-05	-0.00841679
0.8294	0.0347072	0.00560954	0.000564685	2.31353	2.875	2.1875	0.12628	0.00264536	0.0719362	-0.00724108	2.32294	6.46854e-05	-0.0094134
0.83056	0.0348537	0.00562016	0.000559915	2.32071	2.875	2.1875	0.12628	0.00266762	0.0191905	-0.00804689	2.33117	5.99151e-05	-0.010461
0.83172	0.0350002	0.00563314	0.000557358	2.32813	2.875	2.1875	0.12628	0.00262871	-0.0335457	-0.00886618	2.33965	5.73584e-05	-0.011526
0.83288	0.0348537	0.00565361	0.000561847	2.33632	2.875	2.1875	-0.12628	0.0025286	-0.0862983	-0.00967326	2.3489	6.1847e-05	-0.0125752
0.83404	0.0348537	0.00568492	0.00057731	2.34531	2.875	2.1875	0	0.00249224	-0.0313457	-0.0104424	2.35889	7.73097e-05	-0.0135751
0.8352	0.0347072	0.0057162	0.00059288	2.35424	2.875	2.1875	-0.12628	0.00245711	-0.0302828	-0.0112012	2.3688	9.28804e-05	-0.0145616
0.83636	0.036758	0.00573266	0.000594068	2.36183	2.875	2.1875	1.76791	0.0024857	0.0246405	-0.0119506	2.37737	9.40679e-05	-0.0155358
0.83752	0.0374904	0.00573855	0.000585706	2.36816	2.875	2.1875	0.631398	0.00164059	-0.72854	-0.0127181	2.3847	8.57058e-05	-0.0165335
0.83868	0.0345607	0.00574504	0.000578362	2.37437	2.875	2.1875	-2.52559	0.000483825	-0.997211	-0.0131313	2.39145	7.83619e-05	-0.0170707
0.83984	0.0347072	0.00575757	0.000577469	2.38089	2.875	2.1875	0.12628	0.000577183	0.080481	-0.0130575	2.39787	7.74695e-05	-0.0169748
0.841	0.0347072	0.00578039	0.000587257	2.38805	2.875	2.1875	0	0.000608333	0.0268534	-0.01303	2.40499	8.72569e-05	-0.016939
0.84216	0.0348537	0.00580201	0.000596553	2.39483	2.875	2.1875	0.12628	0.000639784	0.0271129	-0.0130223	2.41176	9.65531e-05	-0.0169289
0.84332	0.0347072	0.00582366	0.000596603	2.40543	2.875	2.1875	-0.12628	0.000609057	-0.0264888	-0.0130344	2.42238	9.66029e-05	-0.0169447
0.84448	0.0348537	0.00583569	0.000587406	2.41512	2.875	2.1875	0.12628	0.000641126	0.0276457	-0.0130398	2.43208	8.74064e-05	-0.0169518
0.84564	0.0348537	0.00584686	0.000577719	2.4246	2.875	2.1875	4.18726e-14	0.000611018	-0.0259552	-0.0130654	2.44158	7.77186e-05	-0.016985
0.8468	0.0354397	0.00586292	0.000573274	2.4343	2.875	2.1875	0.505119	0.000581213	-0.025694	-0.0130846	2.45131	7.32738e-05	-0.01701
0.84796	0.0350002	0.0058887	0.000579205	2.44451	2.875	2.1875	-0.378839	0.000301718	-0.240944	-0.0130976	2.46154	7.92048e-05	-0.0170268
0.84912	0.0347072	0.00591365	0.000584338	2.45463	2.875	2.1875	-0.252559	0.000209855	-0.0791922	-0.0129978	2.47153	8.43384e-05	-0.0168971
0.85028	0.0347072	0.00593807	0.000589281	2.46458	2.875	2.1875	0	0.000243085	0.0286466	-0.0128652	2.48131	8.92813e-05	-0.0167248
0.85144	0.0347072	0.00595294	0.000584672	2.47377	2.875	2.1875	0	0.000276434	0.0287491	-0.0127532	2.49035	8.46721e-05	-0.0165792
0.8526	0.0347072	0.00596639	0.000578966	2.48273	2.875	2.1875	0	0.000309921	0.0288681	-0.0126618	2.49919	7.89663e-05	-0.0164603
0.85376	0.0347072	0.00598328	0.000576994	2.49183	2.875	2.1875	0	0.000343561	0.029	-0.0125908	2.50819	7.69938e-05	-0.0163681
0.85492	0.0347072	0.00600905	0.000583889	2.50163	2.875	2.1875	0	0.000377371	0.0291466	-0.0125405	2.51793	8.38885e-05	-0.0163027
0.85608	0.0341213	0.00603465	0.000590592	2.51143	2.875	2.1875	-0.505119	0.000411367	0.0293069	-0.0125108	2.52769	9.05924e-05	-0.016264
0.85724	0.037344	0.00605888	0.0005959	2.52113	2.875	2.1875	2.77815	0.000695545	0.244981	-0.0125018	2.53738	9.59004e-05	-0.0162523
0.8584	0.0352932	0.0060727	0.000590753	2.53003	2.875	2.1875	-1.76791	-0.000394807	-0.939959	-0.0126202	2.54644	9.07535e-05	-0.0164063
0.85956	0.0342678	0.00607914	0.00057817	2.53837	2.875	2.1875	-0.883957	-0.000610434	-0.185885	-0.0122797	2.55433	7.81697e-05	-0.0159636
0.86072	0.0347072	0.00608785	0.000568111	2.54679	2.875	2.1875	0.378839	-0.000388905	0.190973	-0.0118533	2.5622	6.81107e-05	-0.0154092
0.86188	0.0347072	0.00610338	0.000565404	2.55553	2.875	2.1875	0	-0.00035505	0.0291853	-0.0115272	2.57051	6.54042e-05	-0.0149854
0.86304	0.0347072	0.00612936	0.000568539	2.56698	2.875	2.1875	0	-0.000321371	0.0290336	-0.0112213	2.58157	6.85388e-05	-0.0145877
0.8642	0.0348537	0.00615493	0.000571777	2.57819	2.875	2.1875	0.12628	-0.000287852	0.0288957	-0.0109353	2.59241	7.1777e-05	-0.0142159
0.86536	0.0345607	0.00618312	0.000567871	2.59363	2.875	2.1875	-0.252559	-0.000316968	-0.0251	-0.0106691	2.6075	6.78708e-05	-0.0138698
0.86652	0.0348537	0.00620247	0.000555308	2.6083	2.875	2.1875	0.252559	-0.000221254	0.0825121	-0.0103957	2.62181	5.53083e-05	-0.0135143
0.86768	0.0345607	0.00622326	0.000543749	2.62326	2.875	2.1875	-0.252559	-0.000250637	-0.0253302	-0.0101682	2.63648	4.37489e-05	-0.0132187
0.86884	0.0361721	0.00625062	0.000538322	2.63892	2.875	2.1875	1.38908	-0.000155156	0.0823112	-0.00993328	2.65184	3.83219e-05	-0.0129133
0.87	0.0347072	0.0062873	0.000542649	2.65514	2.875	2.1875	-1.2628	-0.000747188	-0.510372	-0.009744	2.6678	4.26491e-05	-0.0126672
0.87116	0.0347072	0.00632274	0.000546161	2.67108	2.875	2.1875	0	-0.000714647	0.0280526	-0.00930696	2.68318	4.6161e-05	-0.012099
0.87232	0.0345607	0.00635877	0.000549765	2.68727	2.875	2.1875	-0.12628	-0.000682461	0.0277466	-0.00888841	2.69882	4.97652e-05	-0.0115549
0.87348	0.0342678	0.00638544	0.000544402	2.70256	2.875	2.1875	-0.252559	-0.000588118	0.0813302	-0.00848799	2.7136	4.4402e-05	-0.0110344
0.87464	0.0347072	0.00641062	0.000538224	2.71746	2.875	2.1875	0.378839	-0.000369077	0.188828	-0.00813202	2.72803	3.82243e-05	-0.0105716
0.8758	0.0347072	0.00644126	0.00053727	2.73289	2.875	2.1875	0	-0.000337702	0.0270474	-0.00787352	2.74312	3.72699e-05	-0.0102356
0.87696	0.0358791	0.00648131	0.000545767	2.74904	2.875	2.1875	1.01024	-0.000306493	0.0269043	-0.00763231	2.75896	4.57673e-05	-0.009922
0.87812	0.0348537	0.00651931	0.000553149	2.76464	2.875	2.1875	-0.883957	-0.000775391	-0.404222	-0.00740818	2.77427	5.31488e-05	-0.00963064
0.87928	0.0347072	0.00655649	0.000560928	2.77967	2.875	2.1875	-0.12628	-0.000807212	-0.0274319	-0.00698768	2.78876	6.09282e-05	-0.00908398
0.88044	0.0341213	0.0065847	0.000560048	2.79388	2.875	2.1875	-0.505119	-0.000776939	0.0260974	-0.00655706	2.8024	6.00477e-05	-0.00852418
0.8816	0.0345607	0.00660579	0.000552319	2.80741	2.875	2.1875	0.378839	-0.000497073	0.241264	-0.0061426	2.81539	5.23193e-05	-0.00798538
0.88276	0.0347072	0.00663002	0.000548009	2.82107	2.875	2.1875	0.12628	-0.000404936	0.0794284	-0.00585058	2.82868	4.8009e-05	-0.00760575
0.88392	0.0348537	0.00666284	0.00055225	2.83543	2.875	2.1875	0.12628	-0.000375494	0.025381	-0.00560076	2.84271	5.22495e-05	-0.00728099
0.88508	0.0347072	0.00669461	0.000555075	2.84985	2.875	2.1875	-0.12628	-0.000408732	-0.0286534	-0.00536628	2.85683	5.50753e-05	-0.00697616
0.88624	0.0347072	0.00672565	0.000557394	2.86413	2.875	2.1875	0	-0.000379677	0.0250474	-0.00512027	2.87078	5.73938e-05	-0.00665635
0.8874	0.0347072	0.00674841	0.000553165	2.87704	2.875	2.1875	0	-0.000350811	0.0248845	-0.00488919	2.88339	5.3165e-05	-0.00635594
0.88856	0.0348537	0.00676473	0.000542387	2.88948	2.875	2.1875	0.12628	-0.000322118	0.0247353	-0.00467284	2.89555	4.2387e-05	-0.0060747
0.88972	0.0347072	0.00678306	0.000533814	2.90201	2.875	2.1875	-0.12628	-0.000356079	-0.0292767	-0.00447105	2.90782	3.38139e-05	-0.00581237
0.89088	0.0347072	0.00680825	0.000531972	2.91512	2.875	2.1875	0	-0.000327722	0.0244457	-0.00425698	2.92066	3.19724e-05	-0.00553408
0.89204	0.0348537	0.00683155	0.0005278	2.92827	2.875	2.1875	0.12628	-0.000299527	0.024306	-0.00405712	2.93355	2.77998e-05	-0.00527426
0.8932	0.0348537	0.00685478	0.000523106	2.94161	2.875	2.1875	0	-0.000333975	-0.0296966	-0.00387129	2.94664	2.31065e-05	-0.00503268
0.89436	0.0347072	0.0068831	0.000523327	2.95541	2.875	2.1875	-0.12628	-0.000368587	-0.0298379	-0.00367269	2.96019	2.33271e-05	-0.00477449
0.89552	0.0351467	0.00690323	0.000516379	2.96815	2.875	2.1875	0.378839	-0.000340888	0.0238784	-0.00346113	2.97265	1.63794e-05	-0.00449947
0.89668	0.0348537	0.00692393	0.000510114	2.98089	2.875	2.1875	-0.252559	-0.000500841	-0.137891	-0.00326311	2.98513	1.01136e-05	-0.00424204
0.89784	0.0344143	0.00695005	0.000509359	2.99401	2.875	2.1875	-0.378839	-0.000536052	-0.0303543	-0.00299845	2.99791	9.35945e-06	-0.00389799
0.899	0.0348537	0.00697253	0.000504753	3.00694	2.875	2.1875	0.378839	-0.000384047	0.131039	-0.00272027	3.01048	4.75276e-06	-0.00353634
0.90016	0.0347072	0.00699382	0.000499312	3.01963	2.875	2.1875	-0.12628	-0.000419714	-0.0307474	-0.00250827	3.02289	-6.88159e-07	-0.00326075
0.90132	0.0347072	0.00701995	0.000498773	3.03267	2.875	2.1875	0	-0.000393094	0.0229483	-0.0022823	3.03564	-1.22693e-06	-0.00296699
0.90248	0.0347072	0.00703796	0.000490148	3.04506	2.875	2.1875	1.19636e-14	-0.00036667	0.0227793	-0.00206882	3.04775	-9.85222e-06	-0.00268947
0.90364	0.0348537	0.00705026	0.000475848	3.05699	2.875	2.1875	0.12628	-0.000340426	0.0226241	-0.00186763	3.05941	-2.41518e-05	-0.00242792
0.9048	0.0345607	0.00706775	0.000466137	3.06957	2.875	2.1875	-0.252559	-0.000376845	-0.0313957	-0.00167857	3.07175	-3.3863e-05	-0.00218214
0.90596	0.0338283	0.00709284	0.000460103	3.08436	2.875	2.1875	-0.631398	-0.000288463	0.0761914	-0.0014748	3.08628	-3.98966e-05	-0.00191724
0.90712	0.0355861	0.00711557	0.000451703	3.09898	2.875	2.1875	1.51536	0.000112248	0.345441	-0.00130946	3.10068	-4.82969e-05	-0.0017023
0.90828	0.0347072	0.0071408	0.000446067	3.11368	2.875	2.1875	-0.757678	-0.000236916	-0.301003	-0.00131573	3.11539	-5.39329e-05	-0.00171045
0.90944	0.0347072	0.00717337	0.000444401	3.13034	2.875	2.1875	0	-0.000211232	0.0221414	-0.00117368	3.13187	-5.55993e-05	-0.00152579
0.9106	0.0347072	0.0071997	0.000436433	3.14654	2.875	2.1875	0	-0.000185652	0.0220517	-0.00104318	3.1479	-6.35668e-05	-0.00135613
0.91176	0.0333889	0.00722856	0.000431222	3.16285	2.875	2.1875	-1.13652	-0.000160165	0.0219716	-0.000924101	3.16405	-6.87777e-05	-0.00120133
0.91292	0.0347072	0.0072645	0.000433296	3.17963	2.875	2.1875	1.13652	0.000427691	0.506772	-0.000816354	3.18069	-6.67037e-05	-0.00106126
0.91408	0.0347072	0.00729757	0.000432084	3.19635	2.875	2.1875	0	0.000453311	0.0220862	-0.000959807	3.1976	-6.79157e-05	-0.00124775
0.91524	0.0348537	0.0073293	0.0004297	3.2129	2.875	2.1875	0.12628	0.000479156	0.0222802	-0.00111467	3.21435	-7.03e-05	-0.00144906
0.9164	0.0347072	0.00736786	0.000433996	3.23005	2.875	2.1875	-0.12628	0.000442743	-0.0313905	-0.0012811	3.23171	-6.60042e-05	-0.00166543
0.91756	0.0347072	0.00740027	0.000431985	3.24678	2.875	2.1875	0	0.000469043	0.0226724	-0.00143264	3.24864	-6.80147e-05	-0.00186243
0.91872	0.0347072	0.0074335	0.000430917	3.26352	2.875	2.1875	0	0.000495576	0.0228733	-0.0015961	3.2656	-6.90831e-05	-0.00207493
0.91988	0.0347072	0.00747271	0.000435623	3.28082	2.875	2.1875	0	0.000522354	0.0230845	-0.00177167	3.28312	-6.4377e-05	-0.00230318
0.92104	0.0347072	0.00750854	0.000437044	3.29782	2.875	2.1875	0	0.00054939	0.0233069	-0.00195955	3.30036	-6.29558e-05	-0.00254741
0.9222	0.0348537	0.00754314	0.000436692	3.31494	2.875	2.1875	0.12628	0.000576699	0.0235422	-0.00215993	3.31774	-6.33084e-05	-0.00280791
0.92336	0.0347072	0.00758346	0.000442116	3.33248	2.875	2.1875	-0.12628	0.000541798	-0.0300871	-0.00237303	3.33557	-5.78838e-05	-0.00308494
0.92452	0.0347072	0.00761835	0.000441239	3.34996	2.875	2.1875	0	0.00056966	0.024019	-0.00257241	3.3533	-5.87614e-05	-0.00334413
0.92568	0.0344143	0.00764933	0.000436173	3.36725	2.875	2.1875	-0.252559	0.000597804	0.0242621	-0.00278495	3.37087	-6.38272e-05	-0.00362044
0.92684	0.0348537	0.00768458	0.000435676	3.38475	2.875	2.1875	0.378839	0.000751232	0.132266	-0.00301088	3.38866	-6.43242e-05	-0.00391415
0.928	0.0348537	0.00771475	0.00042978	3.40198	2.875	2.1875	0	0.000717549	-0.0290371	-0.00330376	3.40628	-7.02205e-05	-0.00429488
0.92916	0.0361721	0.00774349	0.000422106	3.41924	2.875	2.1875	1.13652	0.000684221	-0.028731	-0.0035839	3.4239	-7.78942e-05	-0.00465907
0.93032	0.0341213	0.00777744	0.000419296	3.43706	2.875	2.1875	-1.76791	8.87843e-05	-0.513294	-0.00385159	3.44206	-8.0704e-05	-0.00500707
0.93148	0.0347072	0.00781844	0.000424369	3.45508	2.875	2.1875	0.505119	0.00036831	0.240957	-0.00386717	3.46011	-7.56307e-05	-0.00502732
0.93264	0.0347072	0.00785473	0.000424944	3.47265	2.875	2.1875	0	0.000398041	0.0256302	-0.00400391	3.47785	-7.50561e-05	-0.00520508
0.9338	0.0348537	0.00789478	0.000429176	3.49056	2.875	2.1875	0.12628	0.00042797	0.0258009	-0.00415531	3.49596	-7.08243e-05	-0.00540191
0.93496	0.0347072	0.00792986	0.000427703	3.50838	2.875	2.1875	-0.12628	0.000395616	-0.0278914	-0.00432154	3.51399	-7.22971e-05	-0.005618
0.93612	0.0347072	0.00796149	0.000422941	3.52586	2.875	2.1875	0	0.000425952	0.0261517	-0.00447611	3.53168	-7.70586e-05	-0.00581894
0.93728	0.0347072	0.00799785	0.00042244	3.5439	2.875	2.1875	0	0.000456498	0.0263328	-0.00464583	3.54994	-7.756e-05	-0.00603958
0.93844	0.0347072	0.00804257	0.000429219	3.56305	2.875	2.1875	0	0.000487271	0.0265284	-0.00483088	3.56933	-7.07808e-05	-0.00628015
0.9396	0.0354397	0.00808148	0.000430294	3.5817	2.875	2.1875	0.631398	0.000518285	0.0267362	-0.00503145	3.58824	-6.9706e-05	-0.00654089
0.94076	0.0374904	0.00811793	0.000431404	3.59912	2.875	2.1875	1.76791	0.000237084	-0.242415	-0.00524775	3.60594	-6.85962e-05	-0.00682207
0.94192	0.0345607	0.00815102	0.000428623	3.6165	2.875	2.1875	-2.52559	-0.000918919	-0.996554	-0.00534667	3.62345	-7.13775e-05	-0.00695067
0.94308	0.0345607	0.00817957	0.000421345	3.63351	2.875	2.1875	0	-0.000825492	0.0805405	-0.00495506	3.63995	-7.86553e-05	-0.00644157
0.94424	0.0347072	0.00821023	0.00041591	3.65079	2.875	2.1875	0.12628	-0.000732473	0.0801888	-0.00460575	3.65678	-8.40901e-05	-0.00598748
0.9454	0.0347072	0.00824815	0.000417752	3.66863	2.875	2.1875	0	-0.000702312	0.0260009	-0.00429841	3.67422	-8.22476e-05	-0.00558794
0.94656	0.0348537	0.00828127	0.000415395	3.68586	2.875	2.1875	0.12628	-0.000672497	0.0257026	-0.00400607	3.69106	-8.4605e-05	-0.00520789
0.94772	0.0348537	0.00830931	0.000409139	3.70219	2.875	2.1875	0	-0.00070551	-0.0284595	-0.00372843	3.70704	-9.08613e-05	-0.00484696
0.94888	0.0347072	0.00834224	0.000408042	3.7188	2.875	2.1875	-0.12628	-0.000738872	-0.0287603	-0.00343855	3.72327	-9.19582e-05	-0.00447011
0.95004	0.0347072	0.00837042	0.000402136	3.73506	2.875	2.1875	0	-0.000710106	0.0247983	-0.00313613	3.73913	-9.78638e-05	-0.00407698
0.9512	0.0348537	0.00839597	0.000393533	3.75114	2.875	2.1875	0.12628	-0.00068169	0.0244966	-0.00284755	3.75484	-0.000106467	-0.00370181
0.95236	0.0348537	0.00842706	0.000390686	3.76757	2.875	2.1875	0	-0.000716107	-0.0296698	-0.00257249	3.77091	-0.000109314	-0.00334424
0.95352	0.0347072	0.00846825	0.000397521	3.78496	2.875	2.1875	-0.12628	-0.000750878	-0.029975	-0.00228402	3.78792	-0.000102479	-0.00296923
0.95468	0.0348537	0.00850595	0.000400447	3.80225	2.875	2.1875	0.12628	-0.000723526	0.0235793	-0.00198185	3.80482	-9.9553e-05	-0.00257641
0.95584	0.0347072	0.00854713	0.000406716	3.81987	2.875	2.1875	-0.12628	-0.000759026	-0.0306034	-0.00169233	3.82207	-9.32837e-05	-0.00220004
0.957	0.0347072	0.00858276	0.00040727	3.83712	2.875	2.1875	0	-0.000732408	0.0229466	-0.00138851	3.83892	-9.27299e-05	-0.00180506
0.95816	0.0350002	0.00861586	0.000404827	3.85437	2.875	2.1875	0.252559	-0.000706152	0.0226345	-0.00109672	3.85579	-9.5173e-05	-0.00142574
0.95932	0.0345607	0.00865431	0.000407239	3.87224	2.875	2.1875	-0.378839	-0.000805235	-0.0854164	-0.000816682	3.8733	-9.27608e-05	-0.00106169
0.96048	0.0347072	0.00870116	0.000417831	3.89086	2.875	2.1875	0.12628	-0.000717233	0.0758638	-0.000494774	3.8915	-8.21693e-05	-0.000643207
0.96164	0.0348537	0.00874372	0.000424222	3.90911	2.875	2.1875	0.12628	-0.00069208	0.0216836	-0.000210656	3.90938	-7.57777e-05	-0.000273852
0.9628	0.0347072	0.00878385	0.00042974	3.92652	2.875	2.1875	-0.12628	-0.000729764	-0.0324862	6.2628e-05	3.92644	-7.02602e-05	8.14164e-05
0.96396	0.0336818	0.00881673	0.000428043	3.94335	2.875	2.1875	-0.883957	-0.000705315	0.0210767	0.00035202	3.9429	-7.19571e-05	0.000457625
0.96512	0.0347072	0.00884538	0.000422453	3.95972	2.875	2.1875	0.883957	-0.000243755	0.397897	0.000631155	3.9589	-7.75468e-05	0.000820501
0.96628	0.0347072	0.00887769	0.000421123	3.97611	2.875	2.1875	0	-0.000219776	0.0206716	0.000713688	3.97519	-7.88766e-05	0.000927795
0.96744	0.0345607	0.00891729	0.00042798	3.99272	2.875	2.1875	-0.12628	-0.000195905	0.0205784	0.000786345	3.9917	-7.20202e-05	0.00102225
0.9686	0.0347072	0.00895242	0.000431547	4.00848	2.875	2.1875	0.12628	-0.000109637	0.074369	0.000849207	4.00738	-6.84526e-05	0.00110397
0.96976	0.0347072	0.00898491	0.000432432	4.02406	2.875	2.1875	0	-8.59179e-05	0.0204629	0.000875684	4.02292	-6.75677e-05	0.00113839
0.97092	0.0347072	0.00901025	0.000426104	4.0391	2.875	2.1875	0	-6.2241e-05	0.020431	0.000892469	4.03794	-7.38959e-05	0.00116021
0.97208	0.0345607	0.00902995	0.000414372	4.0536	2.875	2.1875	-0.12628	-3.85948e-05	0.0203448	0.000899584	4.05243	-8.56282e-05	0.00116946
0.97324	0.0348537	0.00905189	0.000405083	4.06819	2.875	2.1875	0.252559	4.75264e-05	0.0742241	0.000897075	4.06702	-9.49168e-05	0.0011662
0.9744	0.0345607	0.00908181	0.000403067	4.0837	2.875	2.1875	-0.252559	8.68272e-06	-0.0334655	0.000858278	4.08258	-9.69334e-05	0.00111576
0.97556	0.0347072	0.00912153	0.000411039	4.0999	2.875	2.1875	0.12628	9.48318e-05	0.0742414	0.000836468	4.09882	-8.89606e-05	0.00108741
0.97672	0.0347072	0.0091572	0.000415111	4.11572	2.875	2.1875	0	0.000118534	0.0204603	0.00077833	4.11471	-8.4889e-05	0.00101183
0.97788	0.0348537	0.00918488	0.000411961	4.1306	2.875	2.1875	0.12628	0.000142294	0.0204828	0.000710452	4.12968	-8.8039e-05	0.000923587
0.97904	0.0347072	0.00920672	0.000402796	4.1451	2.875	2.1875	-0.12628	0.000103631	-0.0333302	0.000632788	4.14427	-9.72042e-05	0.000822625
0.9802	0.0354397	0.00922846	0.000393954	4.15941	2.875	2.1875	0.631398	0.000127513	0.0205879	0.000571933	4.15866	-0.000106046	0.000743513
0.98136	0.0338283	0.00925586	0.000391171	4.17399	2.875	2.1875	-1.38908	-0.000161013	-0.248729	0.000501172	4.17334	-0.000108829	0.000651524
0.98252	0.0347072	0.00929224	0.000398371	4.18888	2.875	2.1875	0.757678	0.000237818	0.34382	0.000553752	4.18816	-0.000101629	0.000719878
0.98368	0.0348537	0.00932464	0.000401664	4.20342	2.875	2.1875	0.12628	0.000261801	0.020675	0.000436454	4.20285	-9.83364e-05	0.00056739
0.98484	0.0348537	0.00935368	0.000401957	4.21754	2.875	2.1875	0	0.00022342	-0.0330871	0.00030914	4.21714	-9.80433e-05	0.000401882
0.986	0.0348537	0.00937605	0.000395324	4.23125	2.875	2.1875	0	0.000185149	-0.0329922	0.000198354	4.23099	-0.000104676	0.00025786
0.98716	0.0347072	0.00939448	0.000385386	4.24439	2.875	2.1875	-0.12628	0.00014697	-0.0329129	0.000103993	4.24425	-0.000114614	0.000135191
0.98832	0.0348537	0.00941744	0.000380294	4.25775	2.875	2.1875	0.12628	0.000171357	0.0210233	2.59715e-05	4.25772	-0.000119706	3.3763e-05
0.98948	0.0345607	0.00944916	0.000384575	4.27155	2.875	2.1875	-0.252559	0.000133336	-0.0327767	-6.2441e-05	4.27163	-0.000115425	-8.11733e-05
0.99064	0.0350002	0.0094791	0.000387662	4.28496	2.875	2.1875	0.378839	0.000220368	0.0750276	-0.000134664	4.28514	-0.000112338	-0.000175063
0.9918	0.0348537	0.00950574	0.000387741	4.29801	2.875	2.1875	-0.12628	0.000120027	-0.0865009	-0.000244083	4.29832	-0.000112259	-0.000317308
0.99296	0.0348537	0.00952399	0.000379679	4.31028	2.875	2.1875	0	8.22403e-05	-0.0326095	-0.000310815	4.31068	-0.000120321	-0.00040406
0.99412	0.0347072	0.00953746	0.000366493	4.32232	2.875	2.1875	-0.12628	4.44937e-05	-0.0325	-0.000361563	4.32279	-0.000133507	-0.000470032
0.99528	0.0348537	0.00955431	0.000357236	4.3344	2.875	2.1875	0.12628	6.92634e-05	0.0213793	-0.000396406	4.33492	-0.000142764	-0.000515328
0.99644	0.0348537	0.0095788	0.000356134	4.34687	2.875	2.1875	0	3.15732e-05	-0.0325	-0.000442026	4.34745	-0.000143866	-0.000574633
0.9976	0.0347072	0.00961394	0.000366207	4.35996	2.875	2.1875	-0.12628	-6.10142e-06	-0.0325	-0.00047178	4.36058	-0.000133793	-0.000613314
0.99876	0.0347072	0.00964587	0.000373564	4.37259	2.875	2.1875	0	1.87152e-05	0.0213793	-0.000485684	4.37323	-0.000126436	-0.000631389
0.99992	0.0348537	0.00966825	0.000371866	4.38427	2.875	2.1875	0.12628	4.3541e-05	0.0213793	-0.000510409	4.38494	-0.000128134	-0.000663532
1.00108	0.0347072	0.00968351	0.000362926	4.39544	2.875	2.1875	-0.12628	5.89419e-06	-0.0324224	-0.000545967	4.39615	-0.000137074	-0.000709757
1.00224	0.0348537	0.00970102	0.000356404	4.40673	2.875	2.1875	0.12628	3.07445e-05	0.0213879	-0.000565749	4.40746	-0.000143596	-0.000735474
1.0034	0.0347072	0.00972593	0.000357431	4.41852	2.875	2.1875	-0.12628	-6.88418e-06	-0.0323966	-0.000596396	4.4193	-0.000142569	-0.000775315
1.00456	0.0347072	0.00976097	0.00036903	4.43094	2.875	2.1875	0	1.79779e-05	0.0214483	-0.000611306	4.43173	-0.00013097	-0.000794697
1.00572	0.0347072	0.00979226	0.00037731	4.44288	2.875	2.1875	0	4.2849e-05	0.0213793	-0.000637132	4.4437	-0.00012269	-0.000828272
1.00688	0.0347072	0.00980894	0.000371101	4.45362	2.875	2.1875	0	6.77412e-05	0.0214655	-0.000673855	4.45449	-0.000128899	-0.000876011
1.00804	0.0347072	0.00981827	0.000357347	4.46386	2.875	2.1875	0	9.26669e-05	0.0215517	-0.000721533	4.4648	-0.000142653	-0.000937993
1.0092	0.0348537	0.0098275	0.000343893	4.47394	2.875	2.1875	0.12628	0.000117639	0.0214991	-0.000780235	4.47495	-0.000156107	-0.00101431
1.01036	0.0347072	0.00984299	0.000336775	4.48447	2.875	2.1875	-0.12628	8.01741e-05	-0.032275	-0.000849962	4.48557	-0.000163225	-0.00110495
1.01152	0.0347072	0.00986866	0.000339916	4.49577	2.875	2.1875	0	0.000105244	0.0215897	-0.000904137	4.49694	-0.000160084	-0.00117538
1.01268	0.0363186	0.00990604	0.000355431	4.50771	2.875	2.1875	1.38908	0.000130365	0.021656	-0.000969445	4.50897	-0.000144569	-0.00126028
1.01384	0.0347072	0.00992887	0.000356144	4.51862	2.875	2.1875	-1.38908	-0.000531885	-0.570905	-0.00104595	4.51998	-0.000143856	-0.00135973
1.015	0.0347072	0.00994349	0.000348699	4.52886	2.875	2.1875	0	-0.000506962	0.0214853	-0.000840437	4.52996	-0.000151301	-0.00109257
1.01616	0.0348537	0.00995688	0.000339739	4.53912	2.875	2.1875	0.12628	-0.00048229	0.021269	-0.000645974	4.53996	-0.000160261	-0.000839767
1.01732	0.0348537	0.00997387	0.000334696	4.54953	2.875	2.1875	0	-0.000520351	-0.0328112	-0.000462357	4.55013	-0.000165304	-0.000601064
1.01848	0.0348537	0.0100008	0.000339911	4.5606	2.875	2.1875	0	-0.000558669	-0.0330328	-0.00026273	4.56094	-0.000160089	-0.000341549
1.01964	0.0350002	0.0100404	0.000358406	4.57241	2.875	2.1875	0.12628	-0.000597264	-0.0332716	-4.68858e-05	4.57247	-0.000141594	-6.09515e-05
1.0208	0.0347072	0.0100649	0.000361194	4.58329	2.875	2.1875	-0.252559	-0.000698649	-0.0874009	0.000185401	4.58305	-0.000138806	0.000241021
1.02196	0.0348537	0.0100792	0.000354317	4.59313	2.875	2.1875	0.12628	-0.000675391	0.02005	0.000461033	4.59253	-0.000145683	0.000599343
1.02312	0.0361721	0.0100923	0.000346532	4.60277	2.875	2.1875	1.13652	-0.000714962	-0.0341129	0.000726971	4.60182	-0.000153468	0.000945062
1.02428	0.0347072	0.0101097	0.000342969	4.61276	2.875	2.1875	-1.2628	-0.00131733	-0.519286	0.00101015	4.61145	-0.000157031	0.0013132
1.02544	0.0347072	0.0101356	0.000348459	4.62319	2.875	2.1875	0	-0.00129542	0.0188948	0.00155082	4.62118	-0.000151541	0.00201606
1.0266	0.0347072	0.0101739	0.000366329	4.63463	2.875	2.1875	0	-0.00127414	0.0183422	0.0020829	4.63192	-0.000133671	0.00270777
1.02776	0.0348537	0.0101981	0.000370609	4.64474	2.875	2.1875	0.12628	-0.00125349	0.0177983	0.00260694	4.64135	-0.000129391	0.00338902
1.02892	0.0347072	0.010207	0.00036251	4.65244	2.875	2.1875	-0.12628	-0.00129596	-0.0366103	0.00312346	4.64838	-0.00013749	0.0040605
1.03008	0.0350002	0.0102123	0.000351393	4.65965	2.875	2.1875	0.252559	-0.00127658	0.0167112	0.00365964	4.65489	-0.000148607	0.00475754
1.03124	0.0347072	0.0102208	0.00034299	4.66727	2.875	2.1875	-0.252559	-0.00138281	-0.0915828	0.00418937	4.66183	-0.00015701	0.00544618
1.0324	0.0341213	0.0102372	0.000342131	4.67569	2.875	2.1875	-0.505119	-0.00136474	0.0155767	0.00476649	4.66949	-0.000157869	0.00619644
1.03356	0.0351467	0.0102641	0.000352439	4.6846	2.875	2.1875	0.883957	-0.00109737	0.230491	0.00533826	4.67766	-0.000147561	0.00693974
1.03472	0.0347072	0.0102813	0.000351567	4.69343	2.875	2.1875	-0.378839	-0.00126801	-0.147097	0.00579861	4.68589	-0.000148433	0.00753819
1.03588	0.0348537	0.0102839	0.000335891	4.70117	2.875	2.1875	0.12628	-0.00125178	0.0139853	0.00633462	4.69293	-0.000164109	0.008235
1.03704	0.0358791	0.0102821	0.000315672	4.70862	2.875	2.1875	0.883957	-0.00129867	-0.0404233	0.00686684	4.69969	-0.000184328	0.0089269
1.0382	0.0347072	0.0102817	0.000297244	4.71599	2.875	2.1875	-1.01024	-0.00178367	-0.418098	0.00742247	4.70634	-0.000202756	0.00964921
1.03936	0.0320705	0.0102889	0.000286035	4.72416	2.875	2.1875	-2.27303	-0.00176959	0.0121362	0.00818869	4.71351	-0.000213965	0.0106453
1.04052	0.0345607	0.0103069	0.000285663	4.73312	2.875	2.1875	2.14675	-0.000631492	0.981119	0.00895295	4.72148	-0.000214337	0.0116388
1.04168	0.0310451	0.0103373	0.000298244	4.74288	2.875	2.1875	-3.03071	-0.000556109	0.0649853	0.00923609	4.73088	-0.000201756	0.0120069
1.04284	0.0347072	0.0103529	0.000296295	4.75131	2.875	2.1875	3.15699	0.00101886	1.35773	0.00949165	4.73897	-0.000203705	0.0123391
1.044	0.0350002	0.0103598	0.000285858	4.75901	2.875	2.1875	0.252559	0.00103198	0.0113086	0.00907998	4.74721	-0.000214142	0.011804
1.04516	0.0347072	0.0103663	0.000275686	4.76639	2.875	2.1875	-0.252559	0.00092062	-0.0959991	0.00866721	4.75512	-0.000224314	0.0112674
1.04632	0.0348537	0.0103778	0.000271514	4.77376	2.875	2.1875	0.12628	0.000934705	0.0121422	0.00830623	4.76296	-0.000228486	0.0107981
1.04748	0.0348537	0.0104001	0.00027787	4.78206	2.875	2.1875	0	0.000886758	-0.0413336	0.00794336	4.77174	-0.00022213	0.0103264
1.04864	0.0347072	0.0104352	0.000297175	4.79135	2.875	2.1875	-0.12628	0.00083925	-0.0409552	0.00760487	4.78147	-0.000202825	0.00988634
1.0498	0.0345607	0.0104549	0.000301346	4.79927	2.875	2.1875	-0.12628	0.000854651	0.0132767	0.00729042	4.78979	-0.000198654	0.00947755
1.05096	0.0347072	0.0104599	0.000292198	4.80552	2.875	2.1875	0.12628	0.00093297	0.0675164	0.006973	4.79646	-0.000207802	0.0090649
1.05212	0.0350002	0.010464	0.000281808	4.8118	2.875	2.1875	0.252559	0.000949256	0.0140397	0.00662562	4.80319	-0.000218192	0.00861331
1.05328	0.0347072	0.0104719	0.000275005	4.81849	2.875	2.1875	-0.252559	0.000841024	-0.0933034	0.00627457	4.81034	-0.000224995	0.00815695
1.05444	0.0347072	0.0104882	0.000276919	4.82571	2.875	2.1875	0	0.000858196	0.0148034	0.00597281	4.81794	-0.000223081	0.00776465
1.0556	0.0348537	0.0105175	0.000291177	4.83417	2.875	2.1875	0.12628	0.000875793	0.0151698	0.00566667	4.8268	-0.000208823	0.00736667
1.05676	0.0347072	0.0105328	0.000292111	4.84128	2.875	2.1875	-0.12628	0.000831329	-0.038331	0.00535583	4.83432	-0.000207889	0.00696257
1.05792	0.0350002	0.0105323	0.000277606	4.84703	2.875	2.1875	0.252559	0.00084977	0.0158974	0.0050666	4.84044	-0.000222394	0.00658658
1.05908	0.0348537	0.0105299	0.000260947	4.85275	2.875	2.1875	-0.12628	0.000743644	-0.0914879	0.00477202	4.84654	-0.000239053	0.00620363
1.06024	0.0345607	0.0105312	0.000247562	4.85887	2.875	2.1875	-0.252559	0.00070038	-0.0372966	0.00452508	4.85299	-0.000252438	0.0058826
1.0614	0.0348537	0.0105403	0.000241974	4.86562	2.875	2.1875	0.252559	0.000782451	0.0707509	0.00429883	4.86003	-0.000258026	0.00558848
1.06256	0.0350002	0.0105607	0.000247807	4.87327	2.875	2.1875	0.12628	0.000739921	-0.0366638	0.0040397	4.86802	-0.000252193	0.00525161
1.06372	0.0347072	0.0105818	0.000254491	4.88085	2.875	2.1875	-0.252559	0.000635263	-0.0902224	0.00380071	4.87591	-0.000245509	0.00494092
1.06488	0.0347072	0.0105874	0.00024602	4.88711	2.875	2.1875	0	0.000655907	0.0177966	0.00360825	4.88241	-0.00025398	0.00469072
1.06604	0.0348537	0.0105882	0.000233264	4.89275	2.875	2.1875	0.12628	0.000676877	0.0180776	0.00340877	4.88832	-0.000266736	0.0044314
1.0672	0.0347072	0.0105908	0.000221956	4.89867	2.875	2.1875	-0.12628	0.000635687	-0.0355086	0.00320203	4.89451	-0.000278044	0.00416264
1.06836	0.0347072	0.0106012	0.000218434	4.90524	2.875	2.1875	0	0.000657305	0.0186362	0.00301445	4.90132	-0.000281566	0.00391878
1.06952	0.0347072	0.0106228	0.000226017	4.9127	2.875	2.1875	0	0.00067925	0.0189181	0.00281913	4.90904	-0.000273983	0.00366487
1.07068	0.0348537	0.0106453	0.000234139	4.92039	2.875	2.1875	0.12628	0.00070153	0.0192069	0.00261585	4.91699	-0.000265861	0.00340061
1.07184	0.0347072	0.0106524	0.0002277	4.92653	2.875	2.1875	-0.12628	0.000661663	-0.0343681	0.00240436	4.9234	-0.0002723	0.00312567
1.073	0.0348537	0.0106547	0.000216364	4.93231	2.875	2.1875	0.12628	0.000684618	0.0197888	0.00221107	4.92944	-0.000283636	0.00287439
1.07416	0.0347072	0.0106579	0.00020556	4.93833	2.875	2.1875	-0.12628	0.000645417	-0.033794	0.00200908	4.93572	-0.00029444	0.0026118
1.07532	0.0348537	0.010668	0.000201326	4.94507	2.875	2.1875	0.12628	0.00066903	0.020356	0.0018248	4.94269	-0.000298674	0.00237224
1.07648	0.0347072	0.0106897	0.000207887	4.95299	2.875	2.1875	-0.12628	0.00063048	-0.0332328	0.00163136	4.95087	-0.000292113	0.00212077
1.07764	0.0348537	0.0107111	0.000214374	4.96081	2.875	2.1875	0.12628	0.000654737	0.0209112	0.00145517	4.95892	-0.000285626	0.00189172
1.0788	0.0350002	0.0107171	0.000205685	4.96735	2.875	2.1875	0.12628	0.000616823	-0.0326845	0.00126935	4.9657	-0.000294315	0.00165015
1.07996	0.0347072	0.0107136	0.000190578	4.97182	2.875	2.1875	-0.252559	0.00051672	-0.0862957	0.00110033	4.97039	-0.000309422	0.00143043
1.08112	0.0347072	0.0107103	0.000175689	4.97636	2.875	2.1875	0	0.000541861	0.0216733	0.000974569	4.9751	-0.000324311	0.00126694
1.08228	0.0348537	0.0107125	0.000166449	4.98127	2.875	2.1875	0.12628	0.00056727	0.0219043	0.000838561	4.98018	-0.000333551	0.00109013
1.08344	0.0347072	0.0107254	0.000167685	4.98707	2.875	2.1875	-0.12628	0.000530466	-0.0317276	0.000692128	4.98617	-0.000332315	0.000899766
1.0846	0.0348537	0.0107395	0.000170336	4.9929	2.875	2.1875	0.12628	0.000556419	0.0223733	0.000561739	4.99217	-0.000329664	0.00073026
1.08576	0.0348537	0.0107395	0.000159301	4.99743	2.875	2.1875	0	0.000520153	-0.0312638	0.000420555	4.99688	-0.000340699	0.000546722
1.08692	0.0345607	0.0107283	0.000137293	5.00103	2.875	2.1875	-0.252559	0.000484144	-0.0310422	0.000295052	5.00065	-0.000362707	0.000383568
1.08808	0.0348537	0.0107163	0.000114269	5.00463	2.875	2.1875	0.252559	0.000573363	0.0769129	0.000185057	5.00439	-0.000385731	0.000240574
1.08924	0.0347072	0.0107083	9.53528e-05	5.00848	2.875	2.1875	-0.12628	0.000537877	-0.0305914	3.70908e-05	5.00844	-0.000404647	4.8218e-05
1.0904	0.0347072	0.0107091	8.53673e-05	5.01298	2.875	2.1875	0	0.000565152	0.0235129	-9.5718e-05	5.0131	-0.000414633	-0.000124433
1.09156	0.0357326	0.0107226	8.461e-05	5.01991	2.875	2.1875	0.883957	0.000592707	0.0237543	-0.00024021	5.02023	-0.00041539	-0.000312274
1.09272	0.0347072	0.0107368	8.46229e-05	5.02685	2.875	2.1875	-0.883957	0.000183095	-0.353114	-0.000396577	5.02737	-0.000415377	-0.000515551
1.09388	0.0345607	0.0107386	7.24176e-05	5.03278	2.875	2.1875	-0.12628	0.000211034	0.0240853	-0.000378389	5.03327	-0.000427582	-0.000491906
1.09504	0.0348537	0.010738	5.82579e-05	5.03835	2.875	2.1875	0.252559	0.000301571	0.0780491	-0.000372308	5.03884	-0.000441742	-0.000484
1.0962	0.0347072	0.0107415	4.72719e-05	5.04457	2.875	2.1875	-0.12628	0.000267269	-0.0295707	-0.000405036	5.0451	-0.000452728	-0.000526547
1.09736	0.0347072	0.0107526	4.42868e-05	5.05123	2.875	2.1875	0	0.000295594	0.0244181	-0.00042333	5.05178	-0.000455713	-0.00055033
1.09852	0.0347072	0.0107746	5.2624e-05	5.05859	2.875	2.1875	0	0.000324065	0.024544	-0.000453919	5.05918	-0.000447376	-0.000590094
1.09968	0.0347072	0.0107966	6.08093e-05	5.06604	2.875	2.1875	0	0.000352696	0.0246819	-0.000496878	5.06669	-0.000439191	-0.000645942
1.10084	0.0348537	0.010804	5.40462e-05	5.07244	2.875	2.1875	0.12628	0.000381501	0.0248319	-0.000552298	5.07316	-0.000445954	-0.000717988
1.102	0.0348537	0.0108021	3.98826e-05	5.07734	2.875	2.1875	0	0.000348002	-0.0288784	-0.000620281	5.07814	-0.000460117	-0.000806365
1.10316	0.0333889	0.0108018	2.73733e-05	5.08233	2.875	2.1875	-1.2628	0.000314674	-0.028731	-0.000674278	5.08321	-0.000472627	-0.000876562
1.10432	0.0348537	0.0108091	2.16469e-05	5.08828	2.875	2.1875	1.2628	0.000906445	0.510147	-0.000714391	5.08921	-0.000478353	-0.000928709
1.10548	0.0348537	0.0108274	2.63253e-05	5.09533	2.875	2.1875	0	0.000873722	-0.0282095	-0.00100732	5.09664	-0.000473675	-0.00130952
1.10664	0.0347072	0.0108451	3.05369e-05	5.10232	2.875	2.1875	-0.12628	0.000841431	-0.0278371	-0.00128679	5.10399	-0.000469463	-0.00167283
1.1078	0.0348537	0.0108504	2.25035e-05	5.10818	2.875	2.1875	0.12628	0.000872051	0.0263966	-0.00155312	5.1102	-0.000477497	-0.00201906
1.10896	0.0348537	0.0108463	4.93965e-06	5.11344	2.875	2.1875	0	0.000840608	-0.027106	-0.00183329	5.11582	-0.00049506	-0.00238327
1.11012	0.0347072	0.0108445	-1.06852e-05	5.11898	2.875	2.1875	-0.12628	0.000809581	-0.0267474	-0.00210094	5.12171	-0.000510685	-0.00273122
1.11128	0.0347072	0.0108533	-1.62233e-05	5.12561	2.875	2.1875	0	0.000841449	0.0274724	-0.0023564	5.12867	-0.000516223	-0.00306332
1.11244	0.0357326	0.0108614	-2.25514e-05	5.13217	2.875	2.1875	0.883957	0.000873734	0.0278319	-0.00262662	5.13559	-0.000522551	-0.00341461
1.1136	0.0347072	0.0108693	-2.93706e-05	5.13885	2.875	2.1875	-0.883957	0.000468991	-0.348916	-0.00291191	5.14264	-0.000529371	-0.00378549
1.11476	0.0347072	0.0108682	-4.54438e-05	5.14496	2.875	2.1875	0	0.00050194	0.0284043	-0.00302597	5.14889	-0.000545444	-0.00393377
1.11592	0.0348537	0.0108691	-5.96029e-05	5.15122	2.875	2.1875	0.12628	0.000535137	0.0286181	-0.00315559	5.15532	-0.000559603	-0.00410226
1.11708	0.0355861	0.0108701	-7.45736e-05	5.15788	2.875	2.1875	0.631398	0.000506105	-0.0250276	-0.00330093	5.16217	-0.000574574	-0.00429121
1.11824	0.0347072	0.01087	-8.97589e-05	5.16409	2.875	2.1875	-0.757678	0.000164853	-0.294183	-0.00343551	5.16856	-0.000589759	-0.00446617
1.1194	0.0348537	0.0108764	-9.82193e-05	5.1707	2.875	2.1875	0.12628	0.000198647	0.0291328	-0.00342621	5.17516	-0.000598219	-0.00445408
1.12056	0.0348537	0.010892	-9.93548e-05	5.17881	2.875	2.1875	0	0.000170046	-0.024656	-0.00343303	5.18327	-0.000599355	-0.00446293
1.12172	0.0348537	0.0109065	-0.000101019	5.1866	2.875	2.1875	0	0.000141528	-0.0245845	-0.00342934	5.19106	-0.000601019	-0.00445814
1.12288	0.0348537	0.010925	-9.89849e-05	5.19487	2.875	2.1875	0	0.000113081	-0.0245233	-0.00341518	5.19931	-0.000598985	-0.00443973
1.12404	0.0347072	0.010935	-0.000105333	5.20236	2.875	2.1875	-0.12628	8.46893e-05	-0.0244664	-0.00339057	5.20677	-0.000605333	-0.00440774
1.1252	0.0348537	0.0109445	-0.000111911	5.20973	2.875	2.1875	0.12628	0.000118834	0.0294259	-0.00335553	5.21409	-0.000611911	-0.0043622
1.12636	0.0347072	0.0109595	-0.000113285	5.2177	2.875	2.1875	-0.12628	9.05432e-05	-0.0244259	-0.00333672	5.22204	-0.000613285	-0.00433774
1.12752	0.0348537	0.0109839	-0.000104925	5.22619	2.875	2.1875	0.12628	0.000124791	0.0295612	-0.00330747	5.23049	-0.000604925	-0.00429971
1.12868	0.0348537	0.0110065	-9.80036e-05	5.23446	2.875	2.1875	0	9.66073e-05	-0.0243026	-0.00329449	5.23875	-0.000598004	-0.00428284
1.12984	0.0350002	0.0110327	-8.76835e-05	5.24306	2.875	2.1875	0.12628	6.84709e-05	-0.0242241	-0.00327111	5.24732	-0.000587684	-0.00425244
1.131	0.0347072	0.0110519	-8.4532e-05	5.25116	2.875	2.1875	-0.252559	-2.21258e-05	-0.0781034	-0.00323736	5.25537	-0.000584532	-0.00420857
1.13216	0.0348537	0.0110731	-7.91837e-05	5.25934	2.875	2.1875	0.12628	1.2255e-05	0.0296552	-0.00316656	5.26346	-0.000579184	-0.00411653
1.13332	0.0348537	0.0111011	-6.68032e-05	5.268	2.875	2.1875	0	-1.58523e-05	-0.0243103	-0.003112	5.27205	-0.000566803	-0.0040456
1.13448	0.0348537	0.011127	-5.67479e-05	5.27654	2.875	2.1875	0	-4.39675e-05	-0.0242241	-0.00304696	5.28051	-0.000556748	-0.00396104
1.13564	0.0348537	0.0111516	-4.78047e-05	5.28493	2.875	2.1875	0	-7.21045e-05	-0.0242241	-0.00297143	5.28879	-0.000547805	-0.00386286
1.1368	0.0350002	0.0111809	-3.3324e-05	5.29338	2.875	2.1875	0.12628	-0.000100277	-0.0242905	-0.00288538	5.29713	-0.000533324	-0.003751
1.13796	0.0345607	0.0112028	-2.62869e-05	5.30118	2.875	2.1875	-0.378839	-0.000190994	-0.0782043	-0.00278874	5.30481	-0.000526287	-0.00362537
1.13912	0.0348537	0.0112255	-1.79305e-05	5.30888	2.875	2.1875	0.252559	-9.4322e-05	0.0833569	-0.00265478	5.31233	-0.00051793	-0.00345122
1.14028	0.0348537	0.0112536	-4.32372e-06	5.31708	2.875	2.1875	0	-0.000122685	-0.0244698	-0.00256339	5.32041	-0.000504324	-0.0033324
1.14144	0.0345607	0.0112787	6.38453e-06	5.32499	2.875	2.1875	-0.252559	-0.00015111	-0.0245043	-0.00246115	5.32819	-0.000493615	-0.0031995
1.1426	0.0360256	0.0113024	1.60119e-05	5.33262	2.875	2.1875	1.2628	-5.46202e-05	0.0831983	-0.00234801	5.33568	-0.000483988	-0.00305241
1.14376	0.0347072	0.01133	2.96982e-05	5.34053	2.875	2.1875	-1.13652	-0.0005831	-0.455603	-0.0022772	5.34349	-0.000470302	-0.00296036
1.14492	0.0347072	0.0113485	3.50658e-05	5.34743	2.875	2.1875	0	-0.00054942	0.0290345	-0.00198204	5.35001	-0.000464934	-0.00257666
1.14608	0.0347072	0.0113614	3.48359e-05	5.35386	2.875	2.1875	0	-0.000516013	0.0287991	-0.00170224	5.35607	-0.000465164	-0.00221291
1.14724	0.0355861	0.0113792	3.95803e-05	5.36063	2.875	2.1875	0.757678	-0.00048286	0.0285802	-0.00143753	5.3625	-0.00046042	-0.00186879
1.1484	0.0348537	0.011405	4.44685e-05	5.37124	2.875	2.1875	-0.631398	-0.000824912	-0.294872	-0.00118767	5.37278	-0.000455531	-0.00154398
1.14956	0.0347072	0.0114287	4.76907e-05	5.38153	2.875	2.1875	-0.12628	-0.000854901	-0.0258526	-0.000792479	5.38256	-0.000452309	-0.00103022
1.15072	0.0347072	0.0114546	5.37791e-05	5.39173	2.875	2.1875	0	-0.000822819	0.0276569	-0.000384882	5.39223	-0.000446221	-0.000500346
1.15188	0.0348537	0.0114736	5.42793e-05	5.40088	2.875	2.1875	0.12628	-0.000791144	0.027306	8.83843e-06	5.40087	-0.000445721	1.149e-05
1.15304	0.0336818	0.0114859	4.82853e-05	5.40935	2.875	2.1875	-1.01024	-0.000822355	-0.026906	0.000389049	5.40885	-0.000451715	0.000505764
1.1542	0.0347072	0.0115012	4.5762e-05	5.41794	2.875	2.1875	0.883957	-0.000354019	0.403738	0.000782768	5.41692	-0.000454238	0.0010176
1.15536	0.0347072	0.0115243	4.73124e-05	5.42862	2.875	2.1875	0	-0.000323318	0.0264664	0.00097707	5.42735	-0.000452688	0.00127019
1.15652	0.0348537	0.0115439	4.62918e-05	5.43865	2.875	2.1875	0.12628	-0.000292777	0.0263284	0.00115876	5.43714	-0.000453708	0.00150638
1.15768	0.0347072	0.0115624	4.51163e-05	5.44822	2.875	2.1875	-0.12628	-0.000324875	-0.0276707	0.00132799	5.44649	-0.000454884	0.00172638
1.15884	0.0348537	0.011588	5.07325e-05	5.45849	2.875	2.1875	0.12628	-0.000294639	0.0260655	0.00151157	5.45652	-0.000449267	0.00196504
1.16	0.0347072	0.0116069	5.01549e-05	5.46798	2.875	2.1875	-0.12628	-0.000327044	-0.0279353	0.001683	5.46579	-0.000449845	0.0021879
1.16116	0.0350002	0.0116272	5.15387e-05	5.47735	2.875	2.1875	0.252559	-0.000297116	0.0258	0.00186909	5.47492	-0.000448461	0.00242982
1.16232	0.0347072	0.0116546	5.94153e-05	5.48755	2.875	2.1875	-0.252559	-0.000392323	-0.082075	0.00204333	5.48489	-0.000440585	0.00265633
1.16348	0.0348537	0.0116792	6.41229e-05	5.49767	2.875	2.1875	0.12628	-0.000362737	0.0255052	0.00225921	5.49473	-0.000435877	0.00293697
1.16464	0.0332424	0.0117055	7.11009e-05	5.50771	2.875	2.1875	-1.38908	-0.000395824	-0.0285233	0.00246358	5.5045	-0.000428899	0.00320265
1.1658	0.0348537	0.0117381	8.54876e-05	5.51777	2.875	2.1875	1.38908	0.00025833	0.563926	0.00268328	5.51428	-0.000414512	0.00348827
1.16696	0.0344143	0.0117646	9.39997e-05	5.52726	2.875	2.1875	-0.378839	0.000225175	-0.0285819	0.00262524	5.52385	-0.000406	0.00341281
1.16812	0.0344143	0.0117916	0.000104193	5.53634	2.875	2.1875	0	0.000379613	0.133136	0.00258263	5.53299	-0.000395807	0.00335742
1.16928	0.0348537	0.0118238	0.000119999	5.54562	2.875	2.1875	0.378839	0.00053424	0.133299	0.00247542	5.5424	-0.000380001	0.00321805
1.17044	0.0347072	0.0118526	0.000132665	5.55455	2.875	2.1875	-0.12628	0.000501649	-0.0280957	0.00230347	5.55155	-0.000367335	0.00299451
1.1716	0.0348537	0.01188	0.000144012	5.56328	2.875	2.1875	0.12628	0.0005318	0.0259922	0.00214656	5.56049	-0.000355988	0.00279052
1.17276	0.0348537	0.0119131	0.000161293	5.5724	2.875	2.1875	0	0.00049972	-0.0276552	0.00197784	5.56982	-0.000338707	0.0025712
1.17392	0.0348537	0.0119395	0.000172133	5.58092	2.875	2.1875	0	0.000467887	-0.0274422	0.0018238	5.57855	-0.000327867	0.00237094
1.17508	0.0347072	0.0119621	0.000178953	5.5892	2.875	2.1875	-0.12628	0.000436286	-0.0272422	0.00168423	5.58701	-0.000321047	0.0021895
1.17624	0.0348537	0.0119893	0.000190517	5.59777	2.875	2.1875	0.12628	0.000467395	0.0268181	0.00155899	5.59575	-0.000309483	0.00202668
1.1774	0.0339748	0.0120112	0.000197164	5.60574	2.875	2.1875	-0.757678	0.000436241	-0.0268569	0.00142124	5.60389	-0.000302836	0.00184761
1.17856	0.0358791	0.0120312	0.000202221	5.61351	2.875	2.1875	1.64164	0.000780269	0.296576	0.00129748	5.61183	-0.000297779	0.00168673
1.17972	0.0347072	0.0120578	0.00021294	5.62211	2.875	2.1875	-1.01024	0.000312257	-0.403459	0.0010276	5.62078	-0.00028706	0.00133588
1.18088	0.0348537	0.0120923	0.000221773	5.63539	2.875	2.1875	0.12628	0.000344354	0.0276698	0.000957892	5.63415	-0.000278227	0.00124526
1.18204	0.0347072	0.0121217	0.000225705	5.64824	2.875	2.1875	-0.12628	0.000314127	-0.0260578	0.000874964	5.6471	-0.000274295	0.00113745
1.1832	0.0354397	0.0121553	0.000233801	5.66135	2.875	2.1875	0.631398	0.00034655	0.0279509	0.000805365	5.66031	-0.000266199	0.00104697
1.18436	0.0345607	0.0121823	0.000236094	5.67368	2.875	2.1875	-0.757678	6.66731e-05	-0.24125	0.000722332	5.67274	-0.000263906	0.000939032
1.18552	0.0348537	0.0122053	0.000235005	5.68541	2.875	2.1875	0.252559	0.000161795	0.0819784	0.000759048	5.68442	-0.000264995	0.000986762
1.18668	0.0348537	0.012233	0.000238988	5.69735	2.875	2.1875	0	0.000132008	-0.0256784	0.00075557	5.69637	-0.000261012	0.00098224
1.18784	0.0348537	0.0122687	0.000251068	5.70991	2.875	2.1875	0	0.000102286	-0.0256224	0.000765173	5.70892	-0.000248932	0.000994725
1.189	0.0347072	0.0122986	0.000257959	5.72175	2.875	2.1875	-0.12628	7.26151e-05	-0.0255914	0.000787835	5.72072	-0.000242041	0.00102419
1.19016	0.0350002	0.0123306	0.000266914	5.73373	2.875	2.1875	0.252559	0.000105474	0.0283397	0.000823552	5.73266	-0.000233086	0.00107062
1.19132	0.0348537	0.012357	0.000270085	5.7454	2.875	2.1875	-0.12628	1.33973e-05	-0.0793741	0.000845652	5.7443	-0.000229915	0.00109935
1.19248	0.0348537	0.0123798	0.000268982	5.75703	2.875	2.1875	0	-1.61789e-05	-0.0255172	0.000907451	5.75585	-0.000231018	0.00117969
1.19364	0.0348537	0.0124053	0.000271157	5.76862	2.875	2.1875	0	-4.57631e-05	-0.0255172	0.000982328	5.76734	-0.000228843	0.00127703
1.1948	0.0347072	0.0124383	0.00028084	5.78081	2.875	2.1875	-0.12628	-7.53699e-05	-0.0255172	0.00107032	5.77942	-0.00021916	0.00139141
1.19596	0.0348537	0.0124664	0.00028535	5.79276	2.875	2.1875	0.12628	-4.25198e-05	0.0283621	0.00117147	5.79124	-0.00021465	0.00152291
1.19712	0.0347072	0.01249	0.000285896	5.80412	2.875	2.1875	-0.12628	-7.2185e-05	-0.0256034	0.00125916	5.80249	-0.000214104	0.00163691
1.19828	0.0348537	0.0125182	0.000284593	5.81848	2.875	2.1875	0.12628	-3.93917e-05	0.0282759	0.00136015	5.81671	-0.000215407	0.00176819
1.19944	0.0347072	0.0125415	0.000278722	5.83236	2.875	2.1875	-0.12628	-6.91121e-05	-0.0256034	0.00144781	5.83048	-0.000221278	0.00188216
1.2006	0.0347072	0.0125665	0.000274624	5.84627	2.875	2.1875	0	-3.63725e-05	0.0281897	0.00154887	5.84426	-0.000225376	0.00201353
1.20176	0.0347072	0.0125972	0.000277129	5.86031	2.875	2.1875	0	-3.65084e-06	0.0282328	0.00163674	5.85818	-0.000222871	0.00212776
1.20292	0.0348537	0.0126376	0.000279895	5.87901	2.875	2.1875	0.12628	2.9069e-05	0.0282328	0.00171144	5.87679	-0.000220105	0.00222488
1.20408	0.0344143	0.0126739	0.000278696	5.89732	2.875	2.1875	-0.378839	-6.91049e-07	-0.0256819	0.00177303	5.89502	-0.000221304	0.00230493
1.20524	0.0347072	0.0127131	0.000281383	5.91542	2.875	2.1875	0.252559	0.000157031	0.135967	0.0018482	5.91301	-0.000218617	0.00240265
1.2064	0.0348537	0.0127466	0.000278292	5.93314	2.875	2.1875	0.12628	0.000189843	0.0282862	0.00185699	5.93072	-0.000221708	0.00241409
1.20756	0.0348537	0.0127769	0.000273953	5.94981	2.875	2.1875	0	0.000160254	-0.0255078	0.00185271	5.9474	-0.000226047	0.00240852
1.20872	0.0350002	0.0128126	0.000275311	5.96674	2.875	2.1875	0.12628	0.000130745	-0.0254388	0.00186196	5.96432	-0.000224689	0.00242055
1.20988	0.0348537	0.0128568	0.000285689	5.98419	2.875	2.1875	-0.12628	3.88058e-05	-0.0792629	0.00188473	5.98174	-0.000214311	0.00245015
1.21104	0.0347072	0.0128968	0.000292406	6.00102	2.875	2.1875	-0.12628	9.38034e-06	-0.0253621	0.00194766	5.99848	-0.000207594	0.00253195
1.2122	0.0350002	0.0129394	0.000301506	6.01816	2.875	2.1875	0.252559	4.24537e-05	0.0285517	0.0020241	6.01553	-0.000198494	0.00263133
1.21336	0.0351467	0.0129749	0.000303933	6.03461	2.875	2.1875	0.12628	-4.94403e-05	-0.0792241	0.00208741	6.03189	-0.000196067	0.00271363
1.21452	0.0342678	0.0130062	0.000302405	6.05059	2.875	2.1875	-0.757678	-0.000203853	-0.133149	0.00219096	6.04774	-0.000197595	0.00284825
1.21568	0.0347072	0.0130423	0.000305682	6.06695	2.875	2.1875	0.378839	1.65986e-05	0.190046	0.0023615	6.06388	-0.000194318	0.00306994
1.21684	0.0347072	0.0130866	0.000317389	6.08384	2.875	2.1875	0	4.95759e-05	0.0284483	0.00243914	6.08066	-0.000182611	0.00317089
1.218	0.0348537	0.013126	0.000324546	6.10023	2.875	2.1875	0.12628	8.25777e-05	0.0284483	0.00250392	6.09697	-0.000175454	0.0032551
1.21916	0.0345607	0.0131624	0.000328966	6.11628	2.875	2.1875	-0.252559	5.31261e-05	-0.025431	0.00255586	6.11296	-0.000171034	0.00332262
1.22032	0.0347072	0.013191	0.00032582	6.13162	2.875	2.1875	0.12628	0.000148689	0.0824043	0.00262165	6.12821	-0.00017418	0.00340814
1.22148	0.0347072	0.0132137	0.000317221	6.14627	2.875	2.1875	0	0.000181832	0.0285716	0.00264795	6.14283	-0.000182779	0.00344234
1.22264	0.0348537	0.0132385	0.000311923	6.16064	2.875	2.1875	0.12628	0.000215064	0.0286483	0.00266143	6.15718	-0.000188077	0.00345986
1.2238	0.0347072	0.0132713	0.000314455	6.17568	2.875	2.1875	-0.12628	0.000185909	-0.0251336	0.00266204	6.17222	-0.000185545	0.00346066
1.22496	0.0347072	0.0133144	0.000327537	6.19145	2.875	2.1875	0	0.00021934	0.0288198	0.00267641	6.18797	-0.000172463	0.00347934
1.22612	0.0347072	0.0133538	0.000336978	6.20687	2.875	2.1875	0	0.000252879	0.0289129	0.00267785	6.20339	-0.000163022	0.0034812
1.22728	0.0347072	0.0133848	0.000337951	6.22169	2.875	2.1875	0	0.000286544	0.0290216	0.00266629	6.21822	-0.000162049	0.00346618
1.22844	0.0348537	0.0134103	0.000333174	6.23614	2.875	2.1875	0.12628	0.000320351	0.029144	0.0026417	6.23271	-0.000166826	0.00343421
1.2296	0.0357326	0.0134368	0.000329592	6.25063	2.875	2.1875	0.757678	0.000291821	-0.0245948	0.00260399	6.24724	-0.000170408	0.00338519
1.23076	0.0347072	0.0134701	0.000332641	6.26574	2.875	2.1875	-0.883957	-0.000111529	-0.347716	0.00257974	6.26238	-0.000167359	0.00335367
1.23192	0.0347072	0.0135137	0.000345947	6.28161	2.875	2.1875	0	-7.74745e-05	0.0293353	0.00272885	6.27806	-0.000154053	0.00354751
1.23308	0.0345607	0.0135514	0.000355923	6.29599	2.875	2.1875	-0.12628	-4.34587e-05	0.0293103	0.00286479	6.29227	-0.000144077	0.00372423
1.23424	0.0347072	0.0135781	0.000355628	6.30925	2.875	2.1875	0.12628	5.30299e-05	0.0831897	0.00298764	6.30536	-0.000144372	0.00388394
1.2354	0.0348537	0.0135982	0.000348987	6.32183	2.875	2.1875	0.12628	8.70505e-05	0.0293966	0.00307081	6.31784	-0.000151013	0.00399205
1.23656	0.0339748	0.0136191	0.000343248	6.33447	2.875	2.1875	-0.757678	5.862e-05	-0.024569	0.00314094	6.33038	-0.000156752	0.00408322
1.23772	0.0342678	0.0136452	0.00034324	6.34725	2.875	2.1875	0.252559	0.000405184	0.298779	0.00322479	6.34306	-0.00015676	0.00419222
1.23888	0.0348537	0.01368	0.000352889	6.36034	2.875	2.1875	0.505119	0.00062696	0.191186	0.00316237	6.35623	-0.000147111	0.00411108
1.24004	0.0347072	0.013712	0.000360119	6.3731	2.875	2.1875	-0.12628	0.000599069	-0.024044	0.0030069	6.36919	-0.000139881	0.00390897
1.2412	0.0350002	0.0137411	0.000359496	6.38762	2.875	2.1875	0.252559	0.000633969	0.0300862	0.00286481	6.3839	-0.000140504	0.00372426
1.24236	0.0345607	0.0137621	0.000350718	6.40152	2.875	2.1875	-0.378839	0.000544194	-0.0773922	0.00270926	6.398	-0.000149282	0.00352204
1.24352	0.0347072	0.0137776	0.000338914	6.41401	2.875	2.1875	0.12628	0.000642171	0.0844629	0.00259335	6.41064	-0.000161086	0.00337135
1.24468	0.0347072	0.0137981	0.000331631	6.42704	2.875	2.1875	0	0.000677972	0.0308629	0.00243692	6.42387	-0.000168369	0.00316799
1.24584	0.0348537	0.013827	0.000333094	6.44064	2.875	2.1875	0.12628	0.000714109	0.0311526	0.00226642	6.4377	-0.000166906	0.00294635
1.247	0.0350002	0.0138672	0.000346325	6.45492	2.875	2.1875	0.12628	0.000688104	-0.0224181	0.00208163	6.45221	-0.000153675	0.00270612
1.24816	0.0348537	0.0139051	0.00035683	6.46918	2.875	2.1875	-0.12628	0.000599946	-0.0759983	0.00190896	6.4667	-0.00014317	0.00248165
1.24932	0.0354397	0.0139347	0.000358574	6.48296	2.875	2.1875	0.505119	0.000574579	-0.0218681	0.00177485	6.48065	-0.000141426	0.0023073
1.25048	0.0350002	0.0139577	0.000353975	6.49615	2.875	2.1875	-0.378839	0.000299519	-0.237121	0.00165243	6.494	-0.000146025	0.00214816
1.25164	0.0338283	0.0139836	0.000352394	6.5095	2.875	2.1875	-1.01024	0.000212091	-0.075369	0.00164819	6.50735	-0.000147606	0.00214265
1.2528	0.0348537	0.0140165	0.000358663	6.5231	2.875	2.1875	0.883957	0.000624721	0.355716	0.00168206	6.52091	-0.000141337	0.00218667
1.25396	0.0347072	0.0140606	0.000376711	6.53726	2.875	2.1875	-0.12628	0.0006002	-0.0211388	0.00154072	6.53526	-0.000123289	0.00200293
1.25512	0.0348537	0.0141009	0.000391748	6.55083	2.875	2.1875	0.12628	0.000638471	0.0329922	0.0014106	6.549	-0.000108252	0.00183379
1.25628	0.0348537	0.0141263	0.000392	6.56319	2.875	2.1875	0	0.000614564	-0.0206095	0.00126486	6.56155	-0.000108	0.00164432
1.25744	0.0347072	0.0141446	0.000385019	6.57508	2.875	2.1875	-0.12628	0.000590961	-0.0203474	0.00112994	6.57361	-0.000114981	0.00146893
1.2586	0.0348537	0.0141638	0.000378956	6.587	2.875	2.1875	0.12628	0.000630144	0.0337784	0.00100565	6.58569	-0.000121044	0.00130735
1.25976	0.0348537	0.0141893	0.000379549	6.59926	2.875	2.1875	0	0.000607146	-0.0198259	0.000865146	6.59814	-0.000120451	0.00112469
1.26092	0.0348537	0.0142256	0.000391025	6.61235	2.875	2.1875	0	0.000584447	-0.0195681	0.000734877	6.6114	-0.000108975	0.00095534
1.26208	0.0344143	0.0142607	0.000401913	6.62508	2.875	2.1875	-0.378839	0.000562038	-0.0193181	0.000614656	6.62428	-9.80868e-05	0.000799053
1.26324	0.0360256	0.0142801	0.00039772	6.6363	2.875	2.1875	1.38908	0.00072739	0.142545	0.0005043	6.63565	-0.00010228	0.00065559
1.2644	0.0352932	0.0142916	0.000385691	6.6469	2.875	2.1875	-0.631398	0.000205665	-0.449763	0.000323649	6.64648	-0.000114309	0.000420744
1.26556	0.0348537	0.0143028	0.000373072	6.6576	2.875	2.1875	-0.378839	-3.48698e-06	-0.180306	0.000365741	6.65712	-0.000126928	0.000475464
1.26672	0.0348537	0.0143182	0.000365293	6.66838	2.875	2.1875	0	-2.5158e-05	-0.0187155	0.000497245	6.66773	-0.000134707	0.000646419
1.26788	0.0348537	0.0143427	0.000367182	6.67963	2.875	2.1875	-1.43563e-13	-4.68414e-05	-0.0186207	0.000638258	6.6788	-0.000132818	0.000829735
1.26904	0.0339748	0.0143797	0.000381761	6.69174	2.875	2.1875	-0.757678	-6.8548e-05	-0.0187069	0.000788801	6.69071	-0.000118239	0.00102544
1.2702	0.0347072	0.0144015	0.000381249	6.70268	2.875	2.1875	0.631398	0.000284677	0.304463	0.000948992	6.70145	-0.000118751	0.00123369
1.27136	0.0347072	0.0144138	0.000371383	6.71276	2.875	2.1875	0	0.000325571	0.0352534	0.000958978	6.71152	-0.000128617	0.00124667
1.27252	0.0350002	0.0144243	0.000360618	6.72236	2.875	2.1875	0.252559	0.000366627	0.0353931	0.000951992	6.72112	-0.000139382	0.00123759
1.27368	0.0347072	0.0144388	0.00035378	6.7323	2.875	2.1875	-0.252559	0.000282876	-0.0721991	0.000927962	6.73109	-0.00014622	0.00120635
1.27484	0.0339748	0.0144622	0.000356604	6.74259	2.875	2.1875	-0.631398	0.000324253	0.0356698	0.000940122	6.74136	-0.000143396	0.00122216
1.276	0.0347072	0.0144974	0.000371812	6.7536	2.875	2.1875	0.631398	0.000678261	0.305179	0.000935094	6.75238	-0.000128188	0.00121562
1.27716	0.0348537	0.0145182	0.000373131	6.76327	2.875	2.1875	0.12628	0.000720135	0.0360983	0.000779499	6.76225	-0.000126869	0.00101335
1.27832	0.0348537	0.0145231	0.000362375	6.77012	2.875	2.1875	0	0.00069987	-0.0174698	0.000606426	6.76933	-0.000137625	0.000788354
1.27948	0.0347072	0.0145249	0.000348902	6.77651	2.875	2.1875	-0.12628	0.000679952	-0.0171707	0.000442298	6.77594	-0.000151098	0.000574988
1.28064	0.0347072	0.01453	0.000338747	6.78323	2.875	2.1875	0	0.000722864	0.0369931	0.000286887	6.78286	-0.000161253	0.000372953
1.2818	0.0350002	0.0145435	0.000337038	6.79052	2.875	2.1875	0.252559	0.000766135	0.0373026	0.00011331	6.79038	-0.000162962	0.000147303
1.28296	0.0376369	0.0145682	0.000346797	6.79864	2.875	2.1875	2.27303	0.000684796	-0.0701198	-7.86709e-05	6.79875	-0.000153203	-0.000102272
1.28412	0.0347072	0.0145919	0.000352623	6.80786	2.875	2.1875	-2.52559	-0.0005211	-1.03957	-0.00023599	6.80816	-0.000147377	-0.000306786
1.28528	0.0338283	0.0146009	0.000343645	6.81598	2.875	2.1875	-0.757678	-0.00047737	0.0376983	0.000121043	6.81583	-0.000156355	0.000157356
1.28644	0.0341213	0.014604	0.000329222	6.82347	2.875	2.1875	0.252559	-5.89106e-05	0.36075	0.000459479	6.82287	-0.000170778	0.000597323
1.2876	0.0348537	0.0146082	0.000315992	6.83098	2.875	2.1875	0.631398	0.000234531	0.252958	0.000619612	6.83017	-0.000184008	0.000805495
1.28876	0.0348537	0.0146195	0.00030999	6.839	2.875	2.1875	0	0.000215618	-0.0163043	0.000654866	6.83815	-0.00019001	0.000851325
1.28992	0.0348537	0.0146419	0.00031514	6.84784	2.875	2.1875	0	0.000196812	-0.0162121	0.000698512	6.84693	-0.00018486	0.000908066
1.29108	0.0348537	0.0146768	0.000333256	6.8575	2.875	2.1875	0	0.000178103	-0.0161284	0.000750528	6.85653	-0.000166744	0.000975686
1.29224	0.0347072	0.0146962	0.000336256	6.86578	2.875	2.1875	-0.12628	0.000159482	-0.0160526	0.000810896	6.86473	-0.000163744	0.00105417
1.2934	0.0347072	0.014707	0.000331392	6.8731	2.875	2.1875	0	0.000203434	0.0378897	0.000879611	6.87196	-0.000168608	0.00114349
1.29456	0.0345607	0.0147181	0.000326514	6.88053	2.875	2.1875	-0.12628	0.000247487	0.0379767	0.000930009	6.87933	-0.000173486	0.00120901
1.29572	0.0347072	0.0147339	0.000327358	6.88793	2.875	2.1875	0.12628	0.000354156	0.091956	0.000962073	6.88668	-0.000172642	0.0012507
1.29688	0.0350002	0.0147599	0.000338759	6.89598	2.875	2.1875	0.252559	0.000398507	0.0382336	0.000949106	6.89475	-0.000161241	0.00123384
1.29804	0.0348537	0.0147981	0.000363138	6.90473	2.875	2.1875	-0.12628	0.000318066	-0.0693457	0.000917687	6.90354	-0.000136862	0.00119299
1.2992	0.0348537	0.0148207	0.000372416	6.91197	2.875	2.1875	0	0.000300278	-0.0153345	0.000921041	6.91077	-0.000127584	0.00119735
1.30036	0.0347072	0.0148281	0.000369316	6.91688	2.875	2.1875	-0.12628	0.000282637	-0.0152078	0.000932439	6.91566	-0.000130684	0.00121217
1.30152	0.0350002	0.0148349	0.000365315	6.92184	2.875	2.1875	0.252559	0.000327631	0.0387879	0.000951824	6.9206	-0.000134685	0.00123737
1.30268	0.0348537	0.0148461	0.000365243	6.9274	2.875	2.1875	-0.12628	0.000247798	-0.0688216	0.000952486	6.92616	-0.000134757	0.00123823
1.30384	0.0345607	0.0148664	0.000374236	6.93365	2.875	2.1875	-0.252559	0.000230583	-0.0148405	0.000987677	6.93237	-0.000125764	0.00128398
1.305	0.0350002	0.0148988	0.000395621	6.94072	2.875	2.1875	0.378839	0.00033847	0.093006	0.0010307	6.93938	-0.000104379	0.00133991
1.30616	0.0348537	0.0149167	0.000402827	6.94652	2.875	2.1875	-0.12628	0.000259041	-0.0684733	0.00102821	6.94519	-9.71727e-05	0.00133667
1.30732	0.0348537	0.0149191	0.00039465	6.95111	2.875	2.1875	0	0.000242235	-0.0144879	0.00106011	6.94973	-0.00010535	0.00137814
1.30848	0.0350002	0.0149198	0.000384376	6.95567	2.875	2.1875	0.12628	0.000225549	-0.0143845	0.00109971	6.95424	-0.000115624	0.00142962
1.30964	0.0348537	0.0149241	0.000377437	6.96065	2.875	2.1875	-0.12628	0.000146481	-0.0681621	0.00114697	6.95915	-0.000122563	0.00149106
1.3108	0.0348537	0.0149366	0.000378662	6.96626	2.875	2.1875	0	0.000129979	-0.0142259	0.00122853	6.96467	-0.000121338	0.00159709
1.31196	0.0348537	0.0149606	0.000391677	6.97267	2.875	2.1875	0	0.000113541	-0.0141707	0.00131774	6.97095	-0.000108323	0.00171306
1.31312	0.0345607	0.0149849	0.00040501	6.9791	2.875	2.1875	-0.252559	9.716e-05	-0.0140871	0.00141461	6.97726	-9.49902e-05	0.00183899
1.31428	0.0347072	0.0149935	0.000402356	6.98444	2.875	2.1875	0.12628	0.000205815	0.0936336	0.00151916	6.98246	-9.76436e-05	0.0019749
1.31544	0.0348537	0.014998	0.000395798	6.98933	2.875	2.1875	0.12628	0.000252078	0.0398819	0.00157811	6.98728	-0.000104202	0.00205155
1.3166	0.0348537	0.015004	0.000390767	6.99437	2.875	2.1875	0	0.000235971	-0.0138853	0.00161812	6.99226	-0.000109233	0.00210355
1.31776	0.0348537	0.0150174	0.000393001	6.99999	2.875	2.1875	0	0.000219981	-0.0137845	0.00166579	6.99782	-0.000106999	0.00216553
1.31892	0.0348537	0.0150419	0.00040673	7.00638	2.875	2.1875	0	0.0002041	-0.0136905	0.00172111	7.00415	-9.32695e-05	0.00223745
1.32008	0.0348537	0.0150672	0.000421087	7.01285	2.875	2.1875	0	0.00018832	-0.0136034	0.00178406	7.01053	-7.89129e-05	0.00231928
1.32124	0.0348537	0.015078	0.000420674	7.01834	2.875	2.1875	0	0.000172633	-0.0135233	0.00185462	7.01593	-7.93264e-05	0.00241101
1.3224	0.0348537	0.0150784	0.000412437	7.0219	2.875	2.1875	0	0.000157032	-0.0134491	0.0019328	7.01939	-8.75631e-05	0.00251264
1.32356	0.0348537	0.0150785	0.000403924	7.02548	2.875	2.1875	0	0.000141508	-0.0133828	0.00201858	7.02285	-9.60755e-05	0.00262416
1.32472	0.0348537	0.0150839	0.000400871	7.02937	2.875	2.1875	0	0.000126055	-0.0133216	0.00211199	7.02662	-9.91289e-05	0.00274559
1.32588	0.0351467	0.0151002	0.00040841	7.03427	2.875	2.1875	0.252559	0.000110663	-0.013269	0.00221304	7.03139	-9.15898e-05	0.00287695
1.32704	0.0348537	0.0151172	0.000417182	7.03901	2.875	2.1875	-0.252559	-2.96615e-05	-0.121003	0.00232175	7.036	-8.28183e-05	0.00301827
1.3282	0.0348537	0.0151196	0.000411181	7.04264	2.875	2.1875	0	-4.50127e-05	-0.0131897	0.00249149	7.0394	-8.88188e-05	0.00323893
1.32936	0.0348537	0.0151109	0.000394332	7.0453	2.875	2.1875	0	-6.03861e-05	-0.0132759	0.00266899	7.04183	-0.000105668	0.00346968
1.33052	0.0347072	0.0151013	0.000376595	7.04793	2.875	2.1875	-0.12628	-7.57895e-05	-0.0132759	0.00285438	7.04422	-0.000123405	0.00371069
1.33168	0.0333889	0.0150955	0.000363396	7.05053	2.875	2.1875	-1.13652	-2.87361e-05	0.0406034	0.00304775	7.04656	-0.000136604	0.00396207
1.33284	0.0347072	0.0150989	0.000359563	7.05376	2.875	2.1875	1.13652	0.000580751	0.525389	0.00322254	7.04957	-0.000140437	0.0041893
1.334	0.0350002	0.0151153	0.000368417	7.05818	2.875	2.1875	0.252559	0.000628078	0.0407991	0.00313891	7.0541	-0.000131583	0.00408058
1.33516	0.0347072	0.0151316	0.000377275	7.06251	2.875	2.1875	-0.252559	0.000550726	-0.0666828	0.00303665	7.05856	-0.000122725	0.00394764
1.33632	0.0344143	0.0151323	0.00037104	7.0654	2.875	2.1875	-0.252559	0.000598636	0.0413017	0.00296889	7.06154	-0.00012896	0.00385955
1.33748	0.0348537	0.0151309	0.000362997	7.06806	2.875	2.1875	0.378839	0.000771831	0.149306	0.00288216	7.06432	-0.000137003	0.0037468
1.33864	0.0350002	0.015134	0.000359186	7.07111	2.875	2.1875	0.12628	0.000757925	-0.0119879	0.00272296	7.06757	-0.000140814	0.00353985
1.3398	0.0348537	0.0151455	0.000363831	7.07489	2.875	2.1875	-0.12628	0.0006819	-0.0655388	0.00257105	7.07154	-0.000136169	0.00334236
1.34096	0.0347072	0.0151696	0.000374822	7.08218	2.875	2.1875	-0.12628	0.000668706	-0.0113741	0.00245284	7.07899	-0.000125178	0.00318869
1.34212	0.0352932	0.0151942	0.000386123	7.08956	2.875	2.1875	0.505119	0.000718338	0.0427862	0.00234148	7.08652	-0.000113877	0.00304392
1.34328	0.0348537	0.0152065	0.000386261	7.09554	2.875	2.1875	-0.378839	0.000518348	-0.172405	0.0022101	7.09267	-0.000113739	0.00287312
1.34444	0.0347072	0.0152156	0.000383996	7.10095	2.875	2.1875	-0.12628	0.000506098	-0.0105603	0.00216513	7.09814	-0.000116004	0.00281467
1.3456	0.0347072	0.0152285	0.000384764	7.10697	2.875	2.1875	0	0.000556592	0.0435293	0.00212646	7.10421	-0.000115236	0.0027644
1.34676	0.0348537	0.0152498	0.000393699	7.11371	2.875	2.1875	0.12628	0.000607361	0.0437664	0.00206731	7.11102	-0.000106301	0.0026875
1.34792	0.0348537	0.0152823	0.00041413	7.12127	2.875	2.1875	0	0.000595937	-0.00984828	0.00198751	7.11869	-8.58698e-05	0.00258377
1.34908	0.0348537	0.0153148	0.000434286	7.1289	2.875	2.1875	0	0.000584808	-0.00959397	0.00191358	7.12641	-6.5714e-05	0.00248765
1.35024	0.0348537	0.015333	0.000439678	7.1356	2.875	2.1875	0	0.000573968	-0.00934483	0.00184533	7.1332	-6.03218e-05	0.00239894
1.3514	0.0348537	0.015342	0.000435746	7.14165	2.875	2.1875	0	0.000563413	-0.00909914	0.00178263	7.13933	-6.42537e-05	0.00231742
1.35256	0.0350002	0.0153522	0.000433061	7.14774	2.875	2.1875	0.12628	0.000553136	-0.00885948	0.00172531	7.1455	-6.69395e-05	0.00224291
1.35372	0.0348537	0.0153701	0.000438265	7.1544	2.875	2.1875	-0.12628	0.000480638	-0.0624983	0.00167323	7.15222	-6.17354e-05	0.0021752
1.35488	0.0350002	0.0153992	0.000454684	7.16188	2.875	2.1875	0.12628	0.000470873	-0.0084181	0.00165291	7.15974	-4.53162e-05	0.00214878
1.35604	0.0347072	0.0154275	0.000470546	7.16928	2.875	2.1875	-0.252559	0.000398847	-0.0620914	0.00163757	7.16715	-2.94539e-05	0.00212885
1.3572	0.0348537	0.0154417	0.000472267	7.17551	2.875	2.1875	0.12628	0.000452006	0.0458267	0.00165377	7.17336	-2.77332e-05	0.00214991
1.35836	0.0348537	0.0154471	0.00046468	7.18127	2.875	2.1875	0	0.000442895	-0.00785431	0.00164811	7.17912	-3.53204e-05	0.00214255
1.35952	0.0348537	0.015453	0.000457447	7.18716	2.875	2.1875	0	0.000434003	-0.00766552	0.00164716	7.18502	-4.25534e-05	0.0021413
1.36068	0.0348537	0.0154643	0.000456001	7.19332	2.875	2.1875	-1.43563e-13	0.000425326	-0.00748017	0.00165081	7.19117	-4.39989e-05	0.00214605
1.36184	0.0339748	0.0154862	0.000464873	7.20041	2.875	2.1875	-0.757678	0.000416859	-0.00729914	0.00165898	7.19825	-3.51266e-05	0.00215667
1.363	0.0348537	0.0155072	0.000473194	7.20727	2.875	2.1875	0.757678	0.000783564	0.316125	0.00167158	7.2051	-2.68062e-05	0.00217305
1.36416	0.0347072	0.0155276	0.000481268	7.21394	2.875	2.1875	-0.12628	0.000775691	-0.00678707	0.00152856	7.21196	-1.87316e-05	0.00198713
1.36532	0.0347072	0.0155383	0.000479738	7.21983	2.875	2.1875	0	0.000830697	0.047419	0.00138966	7.21803	-2.02624e-05	0.00180656
1.36648	0.0347072	0.0155481	0.00047736	7.22564	2.875	2.1875	0	0.000886113	0.0477724	0.00122798	7.22404	-2.26398e-05	0.00159638
1.36764	0.0348537	0.0155625	0.000478968	7.23203	2.875	2.1875	0.12628	0.000941968	0.0481509	0.00104327	7.23067	-2.1032e-05	0.00135625
1.3688	0.0357326	0.015586	0.000489092	7.23937	2.875	2.1875	0.757678	0.000935796	-0.00532069	0.000835244	7.23829	-1.09076e-05	0.00108582
1.36996	0.0350002	0.0156095	0.000498677	7.24696	2.875	2.1875	-0.631398	0.00055512	-0.328169	0.000630263	7.24614	-1.32307e-06	0.000819342
1.37112	0.0348537	0.0156328	0.00050833	7.25439	2.875	2.1875	-0.12628	0.000487191	-0.0585595	0.000588001	7.25363	8.3304e-06	0.000764402
1.37228	0.0366115	0.0156452	0.000507788	7.26072	2.875	2.1875	1.51536	0.000481997	-0.00447759	0.000575011	7.25998	7.7877e-06	0.000747514
1.37344	0.0347072	0.0156508	0.000499767	7.26676	2.875	2.1875	-1.64164	-0.000272889	-0.650764	0.000564521	7.26603	-2.32931e-07	0.000733877
1.3746	0.0347072	0.0156597	0.000494534	7.27331	2.875	2.1875	0	-0.000215485	0.0494862	0.000876365	7.27218	-5.46559e-06	0.00113927
1.37576	0.0347072	0.0156766	0.00049692	7.28062	2.875	2.1875	0	-0.000158188	0.049394	0.00116415	7.27911	-3.07997e-06	0.0015134
1.37692	0.0347072	0.0156924	0.000498468	7.28772	2.875	2.1875	0	-0.000100969	0.0493267	0.00142807	7.28586	-1.53245e-06	0.00185649
1.37808	0.0348537	0.0157083	0.000500084	7.29483	2.875	2.1875	0.12628	-4.38007e-05	0.0492836	0.00166829	7.29266	8.39036e-08	0.00216877
1.37924	0.0352932	0.0157146	0.000493312	7.30071	2.875	2.1875	0.378839	-4.91478e-05	-0.00456897	0.00188494	7.29826	-6.68766e-06	0.00245042
1.3804	0.0348537	0.0157125	0.000478452	7.30582	2.875	2.1875	-0.378839	-0.000242002	-0.166295	0.00210478	7.30309	-2.15484e-05	0.00273622
1.38156	0.0348537	0.0157124	0.000465462	7.3111	2.875	2.1875	0	-0.000247493	-0.00473362	0.00240797	7.30797	-3.45379e-05	0.00313036
1.38272	0.0348537	0.015719	0.00045917	7.31693	2.875	2.1875	0	-0.000253107	-0.00483966	0.00271468	7.3134	-4.08297e-05	0.00352909
1.38388	0.0348537	0.0157359	0.000456553	7.32634	2.875	2.1875	0	-0.000258846	-0.00494741	0.00302514	7.32241	-4.34475e-05	0.00393268
1.38504	0.0348537	0.0157518	0.000453077	7.33556	2.875	2.1875	0	-0.000264713	-0.00505776	0.00333954	7.33122	-4.69233e-05	0.00434141
1.3862	0.0348537	0.0157711	0.00045297	7.34509	2.875	2.1875	0	-0.000270711	-0.00517069	0.0036581	7.34033	-4.70301e-05	0.00475553
1.38736	0.0348537	0.0157821	0.000444452	7.35399	2.875	2.1875	0	-0.000276843	-0.00528621	0.00398103	7.34882	-5.55482e-05	0.00517534
1.38852	0.0348537	0.0157927	0.000435674	7.36278	2.875	2.1875	0	-0.000283112	-0.00540431	0.00430854	7.35717	-6.43262e-05	0.0056011
1.38968	0.0348537	0.0158088	0.000432069	7.37216	2.875	2.1875	0	-0.000289521	-0.005525	0.00464086	7.36613	-6.79315e-05	0.00603312
1.39084	0.0348537	0.0158347	0.000438165	7.38237	2.875	2.1875	0	-0.000296073	-0.00564828	0.00497821	7.3759	-6.18351e-05	0.00647167
1.392	0.0348537	0.0158596	0.000443092	7.39255	2.875	2.1875	0	-0.000302772	-0.005775	0.00532082	7.38563	-5.69079e-05	0.00691707
1.39316	0.0344143	0.015884	0.000447759	7.40262	2.875	2.1875	-0.378839	-0.000309621	-0.00590431	0.00566892	7.39525	-5.22413e-05	0.0073696
1.39432	0.0323635	0.0158996	0.000444011	7.4118	2.875	2.1875	-1.76791	-0.00012914	0.155587	0.00602275	7.40398	-5.59885e-05	0.00782958
1.39548	0.0357326	0.0159084	0.000433661	7.4204	2.875	2.1875	2.90443	0.000926196	0.909772	0.00630256	7.4122	-6.63391e-05	0.00819333
1.39664	0.0348537	0.0159205	0.000427274	7.42894	2.875	2.1875	-0.757678	0.000544623	-0.328942	0.00613526	7.42096	-7.27261e-05	0.00797583
1.3978	0.0348537	0.0159402	0.000428774	7.43803	2.875	2.1875	0	0.000538285	-0.00546379	0.00613378	7.43006	-7.12262e-05	0.00797391
1.39896	0.0348537	0.0159581	0.000428496	7.44693	2.875	2.1875	0	0.000532213	-0.00523448	0.00613804	7.43895	-7.15042e-05	0.00797945
1.40012	0.0355861	0.0159757	0.00042795	7.45574	2.875	2.1875	0.631398	0.000526405	-0.0050069	0.00614793	7.44775	-7.20501e-05	0.0079923
1.40128	0.0350002	0.0159988	0.000424417	7.46857	2.875	2.1875	-0.505119	0.000208386	-0.274154	0.00616333	7.46056	-7.55826e-05	0.00801233
1.40244	0.0348537	0.016015	0.00041397	7.48082	2.875	2.1875	-0.12628	0.000140447	-0.0585681	0.00631747	7.4726	-8.60301e-05	0.00821271
1.4036	0.0350002	0.0160339	0.000405966	7.49336	2.875	2.1875	0.12628	0.000135072	-0.00463362	0.00650371	7.48491	-9.40343e-05	0.00845483
1.40476	0.0348537	0.0160593	0.000404328	7.50652	2.875	2.1875	-0.12628	6.72699e-05	-0.0584241	0.00669547	7.49782	-9.56722e-05	0.00870411
1.40592	0.0348537	0.0160823	0.000400296	7.51947	2.875	2.1875	0	6.1995e-05	-0.00456897	0.00691946	7.51048	-9.97042e-05	0.00899529
1.40708	0.0348537	0.0161047	0.000395378	7.53248	2.875	2.1875	0	5.67508e-05	-0.00448276	0.00714912	7.52319	-0.000104622	0.00929386
1.40824	0.0350002	0.0161322	0.000395915	7.54576	2.875	2.1875	0.12628	5.15346e-05	-0.00456897	0.00738455	7.53616	-0.000104085	0.00959992
1.4094	0.0350002	0.0161519	0.000388918	7.55829	2.875	2.1875	0	-1.61503e-05	-0.0583621	0.00762589	7.54838	-0.000111082	0.00991366
1.41056	0.0348537	0.0161722	0.00038254	7.57087	2.875	2.1875	-0.12628	-8.38432e-05	-0.0582759	0.00789989	7.5606	-0.00011746	0.0102699
1.41172	0.0347072	0.0161988	0.000381913	7.58421	2.875	2.1875	-0.12628	-8.90833e-05	-0.00456897	0.00820664	7.57354	-0.000118087	0.0106686
1.41288	0.0348537	0.0162219	0.000377974	7.59716	2.875	2.1875	0.12628	-3.18734e-05	0.0493103	0.00851971	7.58608	-0.000122026	0.0110756
1.41404	0.0339748	0.0162435	0.000372837	7.60988	2.875	2.1875	-0.757678	-3.71734e-05	-0.00456897	0.00881259	7.59842	-0.000127163	0.0114564
1.4152	0.0351467	0.0162685	0.000372841	7.62214	2.875	2.1875	1.01024	0.000332474	0.318684	0.0091121	7.6103	-0.000127159	0.0118457
1.41636	0.0350002	0.0162858	0.000365602	7.63358	2.875	2.1875	-0.12628	0.000202331	-0.112192	0.0092584	7.62154	-0.000134398	0.0120359
1.41752	0.0348537	0.016297	0.000352929	7.64433	2.875	2.1875	-0.12628	0.000134783	-0.058231	0.00946481	7.63202	-0.000147071	0.0123042
1.41868	0.0348537	0.0163126	0.000345086	7.6552	2.875	2.1875	0	0.000129796	-0.00429914	0.00970472	7.64259	-0.000154914	0.0126161
1.41984	0.0348537	0.0163265	0.000335424	7.66599	2.875	2.1875	0	0.000124873	-0.00424397	0.00995155	7.65305	-0.000164576	0.012937
1.421	0.0348537	0.016338	0.000323333	7.67664	2.875	2.1875	0	0.000120012	-0.00419052	0.0102054	7.66337	-0.000176667	0.013267
1.42216	0.0348537	0.0163533	0.000314849	7.68764	2.875	2.1875	0	0.000115211	-0.00413879	0.0104664	7.67403	-0.000185151	0.0136063
1.42332	0.0350002	0.0163766	0.000307249	7.70218	2.875	2.1875	0.12628	0.000110466	-0.00409052	0.0107346	7.68823	-0.000192751	0.013955
1.42448	0.0342678	0.0163939	0.000293583	7.71632	2.875	2.1875	-0.631398	4.3282e-05	-0.0579017	0.0110102	7.70201	-0.000206417	0.0143132
1.42564	0.0350002	0.0164135	0.000282602	7.73046	2.875	2.1875	0.631398	0.00028859	0.211457	0.0113198	7.71575	-0.000217398	0.0147158
1.4268	0.0347072	0.0164405	0.000278833	7.74526	2.875	2.1875	-0.252559	0.00022157	-0.0577759	0.0115304	7.73027	-0.000221167	0.0149896
1.42796	0.0330959	0.016465	0.000272909	7.75969	2.875	2.1875	-1.38908	0.000279649	0.0500681	0.0117754	7.74438	-0.000227091	0.015308
1.42912	0.0344143	0.0164878	0.000265734	7.77383	2.875	2.1875	1.13652	0.0010253	0.642804	0.0120013	7.75823	-0.000234266	0.0156017
1.43028	0.0350002	0.0165171	0.000265159	7.78846	2.875	2.1875	0.505119	0.00120901	0.158372	0.0119151	7.77297	-0.000234841	0.0154896
1.43144	0.0348537	0.0165403	0.000258797	7.80245	2.875	2.1875	-0.12628	0.00114335	-0.0566086	0.0117564	7.78717	-0.000241203	0.0152833
1.4326	0.0348537	0.0165634	0.000252386	7.81642	2.875	2.1875	0	0.00114074	-0.00224655	0.0116315	7.8013	-0.000247614	0.015121
1.43376	0.0350002	0.0165921	0.000251057	7.83107	2.875	2.1875	0.12628	0.0011387	-0.00176034	0.0115135	7.8161	-0.000248943	0.0149676
1.43492	0.0348537	0.0166172	0.000245747	7.84555	2.875	2.1875	-0.12628	0.00107473	-0.0551483	0.0114021	7.83072	-0.000254253	0.0148227
1.43608	0.0350002	0.0166413	0.000238871	7.8602	2.875	2.1875	0.12628	0.00107378	-0.000815517	0.0113236	7.84548	-0.000261129	0.0147207
1.43724	0.0348537	0.016671	0.000237373	7.87543	2.875	2.1875	-0.12628	0.00101087	-0.0542319	0.0112511	7.86081	-0.000262627	0.0146265
1.4384	0.0348537	0.0166951	0.000229772	7.89035	2.875	2.1875	0	0.00101096	7.32759e-05	0.0112111	7.87577	-0.000270228	0.0145744
1.43956	0.0348537	0.0167148	0.000217879	7.90495	2.875	2.1875	0	0.00101154	0.000505172	0.0111765	7.89042	-0.000282121	0.0145294
1.44072	0.0350002	0.0167391	0.000210447	7.91994	2.875	2.1875	0.12628	0.00101263	0.000937069	0.0111472	7.90544	-0.000289553	0.0144914
1.44188	0.0348537	0.016758	0.000198108	7.93428	2.875	2.1875	-0.12628	0.000951724	-0.052506	0.011123	7.91982	-0.000301892	0.0144599
1.44304	0.0348537	0.0167742	0.000183273	7.94832	2.875	2.1875	0	0.000953783	0.001775	0.0111302	7.93385	-0.000316727	0.0144693
1.4442	0.0348537	0.0167955	0.000173486	7.96282	2.875	2.1875	0	0.000956313	0.00218103	0.0111421	7.94833	-0.000326514	0.0144848
1.44536	0.0348537	0.0168247	0.00017146	7.97798	2.875	2.1875	0	0.000959317	0.00258966	0.0111584	7.96348	-0.00032854	0.014506
1.44652	0.0348537	0.0168485	0.000164508	7.99254	2.875	2.1875	0	0.000962796	0.00299914	0.011179	7.978	-0.000335492	0.0145327
1.44768	0.0330959	0.0168763	0.000161387	8.00747	2.875	2.1875	-1.51536	0.000966751	0.00340948	0.0112036	7.9929	-0.000338613	0.0145647
1.44884	0.0348537	0.0168982	0.00015273	8.02175	2.875	2.1875	1.51536	0.00172111	0.650314	0.0112321	8.00715	-0.00034727	0.0146017
1.45	0.0348537	0.0169162	0.000140649	8.03556	2.875	2.1875	0	0.0017264	0.00455603	0.0109443	8.02133	-0.000359351	0.0142276
1.45116	0.0348537	0.0169385	0.00013299	8.04966	2.875	2.1875	0	0.00173254	0.0052931	0.0106596	8.03581	-0.00036701	0.0138575
1.45232	0.0348537	0.0169688	0.000133375	8.06436	2.875	2.1875	0	0.00173954	0.0060319	0.0103777	8.05087	-0.000366625	0.013491
1.45348	0.0348537	0.0169938	0.000128211	8.07874	2.875	2.1875	0	0.00174739	0.00677414	0.0100978	8.06561	-0.000371789	0.0131272
1.45464	0.0348537	0.0170185	0.000123838	8.0927	2.875	2.1875	0	0.00175612	0.00751983	0.00981962	8.07994	-0.000376162	0.0127655
1.4558	0.0350002	0.0170383	0.000113913	8.10651	2.875	2.1875	0.12628	0.00176571	0.0082681	0.00954257	8.0941	-0.000386087	0.0124053
1.45696	0.0348537	0.0170541	9.96363e-05	8.12011	2.875	2.1875	-0.12628	0.00171368	-0.0448517	0.00926615	8.10806	-0.000400364	0.012046
1.45812	0.0354397	0.0170721	8.79501e-05	8.13375	2.875	2.1875	0.505119	0.00172499	0.00975259	0.0090165	8.12203	-0.00041205	0.0117215
1.45928	0.0348537	0.0170978	8.33789e-05	8.14826	2.875	2.1875	-0.505119	0.00148718	-0.205008	0.0087665	8.13686	-0.000416621	0.0113964
1.46044	0.0348537	0.0171192	7.41403e-05	8.16255	2.875	2.1875	0	0.00150009	0.0111233	0.00862229	8.15134	-0.00042586	0.011209
1.4616	0.0348537	0.0171365	6.11358e-05	8.17642	2.875	2.1875	0	0.00151373	0.0117638	0.00847684	8.1654	-0.000438864	0.0110199
1.46276	0.0351467	0.017158	4.76817e-05	8.1925	2.875	2.1875	0.252559	0.00152813	0.0124095	0.00832976	8.18167	-0.000452318	0.0108287
1.46392	0.0348537	0.0171745	2.92405e-05	8.20822	2.875	2.1875	-0.252559	0.00141829	-0.0946871	0.00818067	8.19758	-0.000470759	0.0106349
1.46508	0.0348537	0.0171883	1.09379e-05	8.2225	2.875	2.1875	0	0.00143414	0.0136664	0.00808248	8.21199	-0.000489062	0.0105072
1.46624	0.0350002	0.0172074	-1.49595e-06	8.237	2.875	2.1875	0.12628	0.00145071	0.0142776	0.00798153	8.22663	-0.000501496	0.010376
1.4674	0.0348537	0.0172358	-4.44267e-06	8.25216	2.875	2.1875	-0.12628	0.00140549	-0.0389767	0.00787746	8.24192	-0.000504443	0.0102407
1.46856	0.0348537	0.0172603	-1.11941e-05	8.26693	2.875	2.1875	0	0.00142347	0.0154966	0.00779659	8.25679	-0.000511194	0.0101356
1.46972	0.0348537	0.0172883	-1.45042e-05	8.28204	2.875	2.1875	0	0.00144215	0.0161043	0.0077119	8.27201	-0.000514504	0.0100255
1.47088	0.0348537	0.0173099	-2.43426e-05	8.29672	2.875	2.1875	0	0.00146155	0.016719	0.00762305	8.28681	-0.000524343	0.00990997
1.47204	0.0355861	0.0173283	-3.73914e-05	8.31108	2.875	2.1875	0.631398	0.00148166	0.0173431	0.00752971	8.30129	-0.000537391	0.00978862
1.4732	0.0348537	0.0173517	-4.48975e-05	8.32568	2.875	2.1875	-0.631398	0.00119004	-0.251397	0.00743151	8.31602	-0.000544897	0.00966096
1.47436	0.0348537	0.0173836	-4.3542e-05	8.34078	2.875	2.1875	0	0.00121148	0.0184828	0.0074614	8.33108	-0.000543542	0.00969982
1.47552	0.0348537	0.017411	-4.66147e-05	8.35549	2.875	2.1875	0	0.00123352	0.0189991	0.00748584	8.34576	-0.000546615	0.00973159
1.47668	0.0363186	0.0174382	-4.868e-05	8.36966	2.875	2.1875	1.2628	0.00125617	0.0195259	0.00750457	8.3599	-0.00054868	0.00975595
1.47784	0.0348537	0.017459	-5.75926e-05	8.38355	2.875	2.1875	-1.2628	0.000654501	-0.518682	0.00751736	8.37378	-0.000557593	0.00977257
1.479	0.0348537	0.0174751	-7.09402e-05	8.39694	2.875	2.1875	0	0.000678097	0.0203414	0.00779056	8.38681	-0.00057094	0.0101277
1.48016	0.0348537	0.0174955	-7.9668e-05	8.41053	2.875	2.1875	0	0.000702028	0.0206302	0.00805755	8.40005	-0.000579668	0.0104748
1.48132	0.0348537	0.0175244	-7.98534e-05	8.42479	2.875	2.1875	0	0.000726306	0.0209293	0.00831831	8.41397	-0.000579853	0.0108138
1.48248	0.0348537	0.0175485	-8.4787e-05	8.43868	2.875	2.1875	0	0.000750944	0.0212397	0.00857284	8.42753	-0.000584787	0.0111447
1.48364	0.0348537	0.0175692	-9.29609e-05	8.45217	2.875	2.1875	0	0.000775954	0.0215603	0.00882109	8.44071	-0.000592961	0.0114674
1.4848	0.0348537	0.0175824	-0.000108608	8.4651	2.875	2.1875	0	0.000801347	0.0218905	0.00906304	8.45332	-0.000608608	0.011782
1.48596	0.0360256	0.0175903	-0.00012932	8.4775	2.875	2.1875	1.01024	0.000827138	0.0222336	0.00929865	8.46542	-0.00062932	0.0120882
1.48712	0.0348537	0.0176013	-0.000146649	8.49006	2.875	2.1875	-1.01024	0.000353383	-0.408409	0.00952785	8.47767	-0.000646649	0.0123862
1.48828	0.0348537	0.0176203	-0.00015577	8.50315	2.875	2.1875	0	0.000379758	0.0227371	0.00996388	8.4902	-0.00065577	0.012953
1.48944	0.0348537	0.0176498	-0.000154273	8.51697	2.875	2.1875	0	0.00040632	0.0228983	0.0103936	8.50346	-0.000654273	0.0135117
1.4906	0.0348537	0.0176754	-0.000156654	8.53054	2.875	2.1875	0	0.000433083	0.0230716	0.0108171	8.51648	-0.000656654	0.0140623
1.49176	0.0348537	0.0176925	-0.000167749	8.54349	2.875	2.1875	0	0.000460061	0.0232569	0.0112346	8.52888	-0.000667749	0.014605
1.49292	0.0350002	0.0177037	-0.000184541	8.5559	2.875	2.1875	0.12628	0.000487266	0.0234526	0.0116461	8.54076	-0.000684541	0.0151399
1.49408	0.0348537	0.0177166	-0.000199488	8.56838	2.875	2.1875	-0.12628	0.000452219	-0.0302129	0.0120518	8.55272	-0.000699488	0.0156673
1.49524	0.0339748	0.017736	-0.000208067	8.58145	2.875	2.1875	-0.757678	0.000479889	0.0238534	0.0124783	8.56523	-0.000708067	0.0162218
1.4964	0.0336818	0.0177659	-0.000206354	8.59541	2.875	2.1875	-0.252559	0.000882762	0.347304	0.0128993	8.57864	-0.000706354	0.0167691
1.49756	0.0350002	0.0177918	-0.000207942	8.60875	2.875	2.1875	1.13652	0.00141106	0.45543	0.0131548	8.59165	-0.000707942	0.0171012
1.49872	0.0358791	0.0178079	-0.000219476	8.62142	2.875	2.1875	0.757678	0.00137761	-0.0288379	0.0131913	8.60427	-0.000719476	0.0171487
1.49988	0.0336818	0.0178188	-0.000237942	8.63439	2.875	2.1875	-1.89419	0.000969875	-0.351495	0.0132487	8.61717	-0.000737942	0.0172233
1.50104	0.0350002	0.0178309	-0.000255496	8.64754	2.875	2.1875	1.13652	0.00150003	0.457033	0.0134866	8.63001	-0.000755496	0.0175326
1.5022	0.0348537	0.0178486	-0.000267312	8.66112	2.875	2.1875	-0.12628	0.00146849	-0.0271957	0.013505	8.64356	-0.000767312	0.0175565
1.50336	0.0348537	0.0178757	-0.000269773	8.67541	2.875	2.1875	0	0.00150016	0.0273052	0.0135435	8.65781	-0.000769773	0.0176066
1.50452	0.0348537	0.0178997	-0.000275264	8.68945	2.875	2.1875	0	0.00153258	0.0279448	0.0135752	8.67181	-0.000775264	0.0176478
1.50568	0.0348537	0.0179095	-0.00029436	8.70212	2.875	2.1875	0	0.00156575	0.0285991	0.0135998	8.68444	-0.00079436	0.0176798
1.50684	0.0348537	0.0179111	-0.00032133	8.71403	2.875	2.1875	0	0.0015997	0.0292664	0.013617	8.69633	-0.00082133	0.0177021
1.508	0.0350002	0.0179112	-0.000349845	8.72582	2.875	2.1875	0.12628	0.00163444	0.02995	0.0136265	8.7081	-0.000849845	0.0177144
1.50916	0.0350002	0.0179158	-0.000373879	8.73798	2.875	2.1875	0	0.0016075	-0.0232284	0.0136278	8.72026	-0.000873879	0.0177162
1.51032	0.0350002	0.0179291	-0.000389213	8.75084	2.875	2.1875	0	0.00158135	-0.0225414	0.0136474	8.7331	-0.000889213	0.0177417
1.51148	0.0350002	0.0179539	-0.000393138	8.76463	2.875	2.1875	0	0.00155598	-0.0218672	0.0136849	8.74684	-0.000893138	0.0177904
1.51264	0.0350002	0.0179754	-0.000399852	8.77794	2.875	2.1875	0	0.00153139	-0.0212034	0.01374	8.76008	-0.000899852	0.017862
1.5138	0.0350002	0.0179882	-0.000415399	8.7906	2.875	2.1875	0	0.00150755	-0.02055	0.0138124	8.77264	-0.000915399	0.0179562
1.51496	0.0347072	0.0179946	-0.000435257	8.80193	2.875	2.1875	-0.252559	0.00148446	-0.0199069	0.0139018	8.78386	-0.000935257	0.0180724
1.51612	0.0350002	0.018005	-0.00045158	8.81374	2.875	2.1875	0.252559	0.00158709	0.088475	0.014008	8.79553	-0.00095158	0.0182104
1.51728	0.0350002	0.0180244	-0.000458942	8.82632	2.875	2.1875	0	0.00156552	-0.0185966	0.0140772	8.80802	-0.000958942	0.0183004
1.51844	0.0332424	0.0180554	-0.000454928	8.83987	2.875	2.1875	-1.51536	0.00154472	-0.0179284	0.0141627	8.82146	-0.000954928	0.0184115
1.5196	0.036465	0.0180831	-0.00045615	8.85397	2.875	2.1875	2.77815	0.00227462	0.629222	0.014264	8.83542	-0.00095615	0.0185432
1.52076	0.0348537	0.0181021	-0.000466535	8.86757	2.875	2.1875	-1.38908	0.00163077	-0.555042	0.014061	8.84929	-0.000966535	0.0182793
1.52192	0.0350002	0.0181146	-0.000481558	8.87987	2.875	2.1875	0.12628	0.00167516	0.0382707	0.0141397	8.86149	-0.000981558	0.0183816
1.52308	0.0347072	0.0181292	-0.000494279	8.89229	2.875	2.1875	-0.252559	0.00165789	-0.0148888	0.0142064	8.87383	-0.000994279	0.0184683
1.52424	0.0350002	0.0181515	-0.000498964	8.90516	2.875	2.1875	0.252559	0.00176643	0.0935672	0.0142875	8.88658	-0.000998964	0.0185737
1.5254	0.0351467	0.0181854	-0.000492294	8.91902	2.875	2.1875	0.12628	0.00175085	-0.0134276	0.0143293	8.90039	-0.000992294	0.0186281
1.52656	0.0328029	0.0182154	-0.000488764	8.93231	2.875	2.1875	-2.02047	0.00167365	-0.0665552	0.0143849	8.91361	-0.000988764	0.0187004
1.52772	0.0350002	0.0182287	-0.000500455	8.94364	2.875	2.1875	1.89419	0.00259718	0.796147	0.0144806	8.92482	-0.00100045	0.0188247
1.52888	0.0350002	0.0182539	-0.000500488	8.95601	2.875	2.1875	0	0.00258458	-0.0108586	0.0141894	8.93757	-0.00100049	0.0184462
1.53004	0.0350002	0.0182862	-0.000493094	8.96881	2.875	2.1875	0	0.00257327	-0.00975603	0.0139106	8.95072	-0.000993094	0.0180838
1.5312	0.0351467	0.0183286	-0.000474946	8.98214	2.875	2.1875	0.12628	0.00256322	-0.00865862	0.0136435	8.96441	-0.000974946	0.0177366
1.53236	0.0345607	0.0183821	-0.000446337	8.9966	2.875	2.1875	-0.505119	0.00249195	-0.0614388	0.0133875	8.9792	-0.000946337	0.0174037
1.53352	0.0350002	0.0184355	-0.000417522	9.01093	2.875	2.1875	0.378839	0.00267189	0.155121	0.0131685	8.99381	-0.000917522	0.017119
1.53468	0.0350002	0.018474	-0.00040359	9.02409	2.875	2.1875	0	0.00266567	-0.00536121	0.0128792	9.00735	-0.00090359	0.016743
1.53584	0.0350002	0.0185013	-0.00040091	9.03639	2.875	2.1875	0	0.00266077	-0.004225	0.012599	9.02001	-0.00090091	0.0163787
1.537	0.0350002	0.018528	-0.00039921	9.04878	2.875	2.1875	0	0.00265719	-0.00308966	0.0123271	9.03276	-0.00089921	0.0160252
1.53816	0.0350002	0.0185589	-0.000393355	9.06153	2.875	2.1875	0	0.00265492	-0.00195517	0.0120628	9.04585	-0.000893355	0.0156817
1.53932	0.0350002	0.0185989	-0.000378509	9.07502	2.875	2.1875	0	0.00265397	-0.000823276	0.0118055	9.05968	-0.000878509	0.0153471
1.54048	0.0350002	0.0186512	-0.000351039	9.0894	2.875	2.1875	0	0.00265432	0.000309483	0.0115544	9.07438	-0.000851039	0.0150207
1.54164	0.0357326	0.0187031	-0.000323921	9.10364	2.875	2.1875	0.631398	0.002656	0.00144138	0.0113089	9.08894	-0.000823921	0.0147015
1.5428	0.0350002	0.0187383	-0.000310734	9.11551	2.875	2.1875	-0.631398	0.00234651	-0.266797	0.0110682	9.10112	-0.000810734	0.0143887
1.54396	0.0350002	0.0187707	-0.000299993	9.12695	2.875	2.1875	0	0.00235066	0.00357586	0.0109651	9.1127	-0.000799993	0.0142546
1.54512	0.0350002	0.0188064	-0.000286255	9.13884	2.875	2.1875	0	0.00235597	0.00457845	0.0108656	9.12471	-0.000786255	0.0141253
1.54628	0.0355861	0.0188502	-0.000264681	9.15141	2.875	2.1875	0.505119	0.00236245	0.00558362	0.0107693	9.13741	-0.000764681	0.0140001
1.54744	0.0350002	0.0189052	-0.000231637	9.16481	2.875	2.1875	-0.505119	0.00212012	-0.208905	0.0106755	9.15093	-0.000731637	0.0138781
1.5486	0.0350002	0.0189602	-0.000198582	9.17814	2.875	2.1875	0	0.00212881	0.00749569	0.0106904	9.16424	-0.000698582	0.0138975
1.54976	0.0348537	0.0189999	-0.000180604	9.19022	2.875	2.1875	-0.12628	0.00213856	0.00840431	0.0107068	9.1763	-0.000680604	0.0139189
1.55092	0.0332424	0.0190295	-0.00017256	9.20147	2.875	2.1875	-1.38908	0.00221186	0.0631914	0.0107244	9.18752	-0.00067256	0.0139417
1.55208	0.0350002	0.0190604	-0.000162966	9.21263	2.875	2.1875	1.51536	0.0029737	0.656752	0.010716	9.1987	-0.000662966	0.0139309
1.55324	0.0352932	0.0190987	-0.000146079	9.22447	2.875	2.1875	0.252559	0.00298707	0.0115293	0.010388	9.21096	-0.000646079	0.0135043
1.5544	0.0350002	0.0191487	-0.000118267	9.23757	2.875	2.1875	-0.252559	0.00287693	-0.0949448	0.0100593	9.22449	-0.000618267	0.0130771
1.55556	0.0350002	0.0191985	-9.09929e-05	9.25073	2.875	2.1875	0	0.00289321	0.0140302	0.00978262	9.23802	-0.000590993	0.0127174
1.55672	0.0350002	0.019234	-7.84403e-05	9.26301	2.875	2.1875	0	0.00291092	0.0152655	0.00950383	9.25065	-0.00057844	0.012355
1.55788	0.0351467	0.0192603	-7.51661e-05	9.27453	2.875	2.1875	0.12628	0.00293006	0.0165069	0.0092222	9.26254	-0.000575166	0.0119889
1.55904	0.0347072	0.0192868	-7.15028e-05	9.28606	2.875	2.1875	-0.378839	0.00288817	-0.0361172	0.00893695	9.27444	-0.000571503	0.011618
1.5602	0.0350002	0.0193189	-6.23137e-05	9.29801	2.875	2.1875	0.252559	0.00303518	0.126737	0.00867401	9.28673	-0.000562314	0.0112762
1.56136	0.0371975	0.0193616	-4.27614e-05	9.31091	2.875	2.1875	1.89419	0.00305871	0.0202845	0.00835263	9.30005	-0.000542761	0.0108584
1.56252	0.0339748	0.0194038	-2.37101e-05	9.32377	2.875	2.1875	-2.77815	0.00214634	-0.786526	0.00802536	9.31334	-0.00052371	0.010433
1.56368	0.0352932	0.0194455	-4.84846e-06	9.33647	2.875	2.1875	1.13652	0.00260991	0.399625	0.00809129	9.32595	-0.000504848	0.0105187
1.56484	0.0350002	0.0194771	4.77131e-06	9.348	2.875	2.1875	-0.252559	0.00251232	-0.084131	0.00796346	9.33765	-0.000495229	0.0103525
1.566	0.0350002	0.019508	1.39135e-05	9.35937	2.875	2.1875	0	0.00254096	0.0246905	0.0078812	9.34912	-0.000486086	0.0102456
1.56716	0.0350002	0.0195429	2.74156e-05	9.37094	2.875	2.1875	0	0.00257086	0.0257733	0.00779063	9.36081	-0.000472584	0.0101278
1.56832	0.0350002	0.0195868	5.01172e-05	9.38311	2.875	2.1875	0	0.00260203	0.0268716	0.00769116	9.37312	-0.000449883	0.00999851
1.56948	0.0352932	0.0196306	7.23636e-05	9.39543	2.875	2.1875	0.252559	0.00263448	0.0279802	0.0075822	9.38557	-0.000427636	0.00985685
1.57064	0.0351467	0.0196746	9.477e-05	9.40779	2.875	2.1875	-0.12628	0.00254326	-0.078644	0.00746314	9.39809	-0.00040523	0.00970208
1.5718	0.0351467	0.0197083	0.000107078	9.41924	2.875	2.1875	0	0.00251578	-0.0236845	0.00738669	9.40964	-0.000392922	0.0096027
1.57296	0.0351467	0.0197347	0.00011473	9.42905	2.875	2.1875	0	0.00248955	-0.0226112	0.00732562	9.41952	-0.00038527	0.00952331
1.57412	0.0347072	0.0197644	0.000125281	9.43927	2.875	2.1875	-0.378839	0.00246456	-0.0215483	0.00727937	9.42981	-0.000374719	0.00946318
1.57528	0.0350002	0.0198013	0.000142966	9.45011	2.875	2.1875	0.252559	0.00262826	0.141125	0.00724738	9.44069	-0.000357034	0.00942159
1.57644	0.0350002	0.0198377	0.00015994	9.46095	2.875	2.1875	0	0.00266828	0.0344983	0.00714914	9.45166	-0.00034006	0.00929388
1.5776	0.0348537	0.019874	0.000177117	9.47172	2.875	2.1875	-0.12628	0.00270962	0.0356362	0.00703736	9.46258	-0.000322883	0.00914857
1.57876	0.0350002	0.0199008	0.000184236	9.48192	2.875	2.1875	0.12628	0.00281479	0.0906664	0.00691143	9.47294	-0.000315764	0.00898486
1.57992	0.0351467	0.0199192	0.000183113	9.49139	2.875	2.1875	0.12628	0.00285886	0.0379931	0.00674405	9.48263	-0.000316887	0.00876727
1.58108	0.0350002	0.0199391	0.000183715	9.50093	2.875	2.1875	-0.12628	0.00284186	-0.0146612	0.00656121	9.4924	-0.000316285	0.00852957
1.58224	0.0351467	0.0199655	0.000190875	9.51092	2.875	2.1875	0.12628	0.00288875	0.040425	0.00638887	9.50261	-0.000309125	0.00830553
1.5834	0.0350002	0.0199913	0.00019765	9.52081	2.875	2.1875	-0.12628	0.00287458	-0.0122164	0.00619968	9.51275	-0.00030235	0.00805959
1.58456	0.0345607	0.0200082	0.000195887	9.52983	2.875	2.1875	-0.378839	0.00292432	0.0428836	0.00601961	9.522	-0.000304113	0.0078255
1.58572	0.0369045	0.0200171	0.000185888	9.53829	2.875	2.1875	2.02047	0.003163	0.205755	0.0058213	9.53072	-0.000314112	0.00756769
1.58688	0.0355861	0.0200285	0.00017822	9.54704	2.875	2.1875	-1.13652	0.00240333	-0.654885	0.00552404	9.53986	-0.00032178	0.00718125
1.58804	0.0348537	0.0200472	0.000178013	9.55633	2.875	2.1875	-0.631398	0.0022073	-0.168991	0.00555361	9.54911	-0.000321987	0.00721969
1.5892	0.0350002	0.0200637	0.000176508	9.56503	2.875	2.1875	0.12628	0.00232484	0.101322	0.00566956	9.55766	-0.000323492	0.00737042
1.59036	0.0357326	0.0200791	0.000174308	9.5735	2.875	2.1875	0.631398	0.00238103	0.0484397	0.00573817	9.56604	-0.000325692	0.00745962
1.59152	0.0351467	0.0200995	0.00017685	9.58246	2.875	2.1875	-0.505119	0.00212592	-0.219916	0.00578565	9.57494	-0.00032315	0.00752134
1.59268	0.0354397	0.0201122	0.000171751	9.59079	2.875	2.1875	0.252559	0.00212185	-0.00351207	0.00594482	9.58306	-0.000328249	0.00772827
1.59384	0.0350002	0.0201266	0.000168672	9.59911	2.875	2.1875	-0.378839	0.00199384	-0.110354	0.00610868	9.59117	-0.000331328	0.00794128
1.595	0.0352932	0.0201475	0.000171843	9.60805	2.875	2.1875	0.252559	0.0020543	0.0521181	0.00633017	9.59982	-0.000328157	0.00822922
1.59616	0.0350002	0.0201667	0.000174014	9.61661	2.875	2.1875	-0.252559	0.00199078	-0.0547534	0.006529	9.60812	-0.000325986	0.0084877
1.59732	0.0351467	0.0201856	0.00017549	9.62524	2.875	2.1875	0.12628	0.00205324	0.053844	0.00675816	9.61646	-0.00032451	0.00878561
1.59848	0.0351467	0.0202082	0.000181405	9.63393	2.875	2.1875	0	0.00205422	0.000846552	0.00696402	9.62488	-0.000318595	0.00905322
1.59964	0.0352932	0.0202227	0.000179379	9.64184	2.875	2.1875	0.12628	0.00205622	0.00172241	0.0071729	9.63252	-0.000320621	0.00932478
1.6008	0.0351467	0.0202367	0.00017666	9.64985	2.875	2.1875	-0.12628	0.00199674	-0.051275	0.00738449	9.64025	-0.00032334	0.00959983
1.60196	0.0350002	0.0202558	0.000178683	9.65839	2.875	2.1875	-0.12628	0.00200075	0.00345172	0.0076251	9.64848	-0.000321317	0.00991263
1.60312	0.0350002	0.0202842	0.000189679	9.66779	2.875	2.1875	0	0.00206823	0.0581793	0.00786778	9.65757	-0.000310321	0.0102281
1.60428	0.0350002	0.020312	0.000199382	9.67741	2.875	2.1875	0	0.00213675	0.0590612	0.00808556	9.6669	-0.000300618	0.0105112
1.60544	0.0351467	0.0203397	0.000210215	9.68654	2.875	2.1875	0.12628	0.00220632	0.0599741	0.00827811	9.67578	-0.000289785	0.0107615
1.6066	0.0355861	0.0203592	0.000212516	9.69517	2.875	2.1875	0.378839	0.00221448	0.00703966	0.00844508	9.68419	-0.000287484	0.0109786
1.60776	0.0352932	0.0203727	0.000208401	9.70347	2.875	2.1875	-0.252559	0.00203626	-0.153638	0.00861274	9.69227	-0.000291599	0.0111966
1.60892	0.0350002	0.0203903	0.000207836	9.71238	2.875	2.1875	-0.252559	0.00198404	-0.0450207	0.0088607	9.70086	-0.000292164	0.0115189
1.61008	0.0355861	0.0204153	0.000214445	9.72189	2.875	2.1875	0.505119	0.00205778	0.063575	0.00913532	9.71002	-0.000285555	0.0118759
1.61124	0.0379299	0.0204372	0.000218869	9.73083	2.875	2.1875	2.02047	0.00188257	-0.151045	0.00938301	9.71863	-0.000281131	0.0121979
1.6124	0.0348537	0.0204598	0.00022292	9.74023	2.875	2.1875	-2.65187	0.000708385	-1.01223	0.00971008	9.72761	-0.00027708	0.0126231
1.61356	0.0354397	0.0204887	0.000233248	9.75017	2.875	2.1875	0.505119	0.000846926	0.119432	0.0105429	9.73647	-0.000266752	0.0137058
1.61472	0.0350002	0.0205104	0.000236565	9.75947	2.875	2.1875	-0.378839	0.00073591	-0.0957034	0.0113218	9.74475	-0.000263435	0.0147184
1.61588	0.0350002	0.0205343	0.000241937	9.76899	2.875	2.1875	0	0.00081274	0.0662328	0.0121537	9.75319	-0.000258063	0.0157999
1.61704	0.0351467	0.0205653	0.000253593	9.77936	2.875	2.1875	0.12628	0.000889973	0.0665802	0.0129589	9.76251	-0.000246407	0.0168465
1.6182	0.0350002	0.020593	0.000261572	9.78966	2.875	2.1875	-0.12628	0.000905152	0.0130853	0.0137375	9.7718	-0.000238428	0.0178587
1.61936	0.0352932	0.0206196	0.000268295	9.79993	2.875	2.1875	0.252559	0.000983273	0.0673457	0.0145164	9.78106	-0.000231705	0.0188713
1.62052	0.0350002	0.0206523	0.000280711	9.81088	2.875	2.1875	-0.252559	0.000936892	-0.0399836	0.0152692	9.79103	-0.000219289	0.0198499
1.62168	0.0352932	0.0206776	0.000286142	9.82107	2.875	2.1875	0.252559	0.00101596	0.0681647	0.0160493	9.8002	-0.000213858	0.0208641
1.62284	0.0351467	0.0207022	0.000290932	9.83114	2.875	2.1875	-0.12628	0.000970549	-0.03915	0.0168036	9.8093	-0.000209068	0.0218447
1.624	0.0351467	0.0207323	0.000301125	9.84173	2.875	2.1875	0	0.000988109	0.0151379	0.0175857	9.81887	-0.000198875	0.0228614
1.62516	0.0350002	0.0207581	0.000307363	9.85181	2.875	2.1875	-0.12628	0.00100616	0.0155595	0.0183689	9.82794	-0.000192637	0.0238796
1.62632	0.0342678	0.0207823	0.000311763	9.86185	2.875	2.1875	-0.631398	0.0010872	0.0698638	0.0191535	9.83695	-0.000188237	0.0248996
1.62748	0.0347072	0.0208115	0.000321274	9.87225	2.875	2.1875	0.378839	0.00148125	0.339698	0.019913	9.84637	-0.000178726	0.025887
1.62864	0.0350002	0.0208342	0.000324422	9.88212	2.875	2.1875	0.252559	0.00168855	0.178708	0.0205143	9.85545	-0.000175578	0.0266686
1.6298	0.0350002	0.020852	0.000322419	9.89169	2.875	2.1875	0	0.0017717	0.0716793	0.0210373	9.86434	-0.000177581	0.0273485
1.63096	0.0361721	0.020874	0.000324928	9.90145	2.875	2.1875	1.01024	0.00185572	0.0724353	0.0215352	9.87345	-0.000175072	0.0279958
1.63212	0.0351467	0.0208917	0.000323192	9.91084	2.875	2.1875	-0.883957	0.00144071	-0.357768	0.022008	9.88223	-0.000176808	0.0286103
1.63328	0.0352932	0.0209072	0.000318417	9.92043	2.875	2.1875	0.12628	0.00146388	0.0199672	0.0226686	9.89096	-0.000181583	0.0294692
1.63444	0.0351467	0.0209273	0.00031785	9.93048	2.875	2.1875	-0.12628	0.00142527	-0.0332828	0.0233306	9.90015	-0.00018215	0.0303298
1.6356	0.0351467	0.0209551	0.000322398	9.94227	2.875	2.1875	0	0.00144986	0.0212	0.0240207	9.91104	-0.000177602	0.0312269
1.63676	0.0350002	0.0209778	0.000321793	9.95364	2.875	2.1875	-0.12628	0.00147517	0.0218181	0.0247121	9.92151	-0.000178207	0.0321257
1.63792	0.0351467	0.0210038	0.000324492	9.96528	2.875	2.1875	0.12628	0.0015637	0.0763224	0.025405	9.93225	-0.000175508	0.0330264
1.63908	0.0351467	0.0210255	0.000323246	9.97647	2.875	2.1875	0	0.00159052	0.0231147	0.0260726	9.94257	-0.000176754	0.0338944
1.64024	0.0335354	0.0210443	0.000318962	9.98743	2.875	2.1875	-1.38908	0.00161812	0.023794	0.0267417	9.95267	-0.000181038	0.0347643
1.6414	0.0380764	0.0210664	0.000317679	9.9988	2.875	2.1875	3.91467	0.00233395	0.617101	0.0274123	9.96317	-0.000182321	0.035636
1.64256	0.0351467	0.021096	0.000323625	10.0109	2.875	2.1875	-2.52559	0.00111362	-1.05201	0.0277911	9.97479	-0.000176375	0.0361284
1.64372	0.0350002	0.0211197	0.000323813	10.0225	2.875	2.1875	-0.12628	0.00114373	0.0259543	0.0287042	9.98514	-0.000176187	0.0373155
1.64488	0.0351467	0.0211432	0.000324287	10.0338	2.875	2.1875	0.12628	0.0012369	0.0803172	0.0296187	9.99526	-0.000175713	0.0385043
1.64604	0.0358791	0.0211724	0.000330482	10.0456	2.875	2.1875	0.631398	0.00126819	0.0269698	0.0305081	10.0059	-0.000169518	0.0396606
1.6472	0.0361721	0.0211972	0.000332433	10.0569	2.875	2.1875	0.252559	0.000987627	-0.24186	0.0313993	10.0161	-0.000167567	0.0408191
1.64836	0.0351467	0.0212203	0.00033256	10.0682	2.875	2.1875	-0.883957	0.000582569	-0.349188	0.0324257	10.0261	-0.00016744	0.0421534
1.64952	0.0351467	0.0212502	0.000339016	10.0802	2.875	2.1875	0	0.000615259	0.028181	0.0336409	10.0365	-0.000160984	0.0437332
1.65068	0.0351467	0.0212747	0.000340025	10.0918	2.875	2.1875	0	0.000648254	0.028444	0.0348588	10.0465	-0.000159975	0.0453165
1.65184	0.0351467	0.0212952	0.000336795	10.1032	2.875	2.1875	0	0.000681569	0.0287198	0.03608	10.0563	-0.000163205	0.046904
1.653	0.0351467	0.0213212	0.000338387	10.1153	2.875	2.1875	0	0.000715222	0.0290112	0.0373047	10.0668	-0.000161613	0.0484961
1.65416	0.0352932	0.0213419	0.000335137	10.1268	2.875	2.1875	0.12628	0.000749229	0.0293164	0.0385336	10.0767	-0.000164863	0.0500937
1.65532	0.0350002	0.0213598	0.000329155	10.1381	2.875	2.1875	-0.252559	0.000721112	-0.0242388	0.039767	10.0864	-0.000170845	0.0516971
1.65648	0.0351467	0.0213834	0.000328596	10.1498	2.875	2.1875	0.12628	0.00081834	0.0838172	0.0410321	10.0965	-0.000171404	0.0533418
1.65764	0.0351467	0.0214161	0.000337083	10.1624	2.875	2.1875	0	0.00085348	0.0302931	0.0422761	10.1074	-0.000162917	0.0549589
1.6588	0.0351467	0.0214443	0.00034133	10.1745	2.875	2.1875	0	0.000889041	0.030656	0.0435259	10.1179	-0.00015867	0.0565837
1.65996	0.0350002	0.0214762	0.000349193	10.1869	2.875	2.1875	-0.12628	0.000925043	0.0310362	0.0447821	10.1287	-0.000150807	0.0582168
1.66112	0.0351467	0.021503	0.000351312	10.1992	2.875	2.1875	0.12628	0.001024	0.0853052	0.0460452	10.1393	-0.000148688	0.0598587
1.66228	0.0350002	0.0215264	0.000350406	10.211	2.875	2.1875	-0.12628	0.00106096	0.0318672	0.0472888	10.1496	-0.000149594	0.0614754
1.66344	0.0351467	0.021554	0.000354027	10.2231	2.875	2.1875	0.12628	0.00116095	0.086194	0.04854	10.16	-0.000145973	0.063102
1.6646	0.0366115	0.0215897	0.000366102	10.2356	2.875	2.1875	1.2628	0.00119901	0.0328155	0.0497726	10.1709	-0.000133898	0.0647044
1.66576	0.0366115	0.0216206	0.000373348	10.2478	2.875	2.1875	0	0.000612731	-0.505416	0.0510136	10.1815	-0.000126652	0.0663177
1.66692	0.0350002	0.0216485	0.000380904	10.2584	2.875	2.1875	-1.38908	2.67515e-05	-0.505113	0.05253	10.1901	-0.000119096	0.068289
1.66808	0.0351467	0.0216694	0.000382126	10.2681	2.875	2.1875	0.12628	0.000128221	0.0874319	0.0543223	10.1975	-0.000117874	0.070619
1.66924	0.0351467	0.0216864	0.000379433	10.2776	2.875	2.1875	0	0.00016726	0.0336543	0.0560983	10.2047	-0.000120567	0.0729277
1.6704	0.0351467	0.0217071	0.000380677	10.2872	2.875	2.1875	0	0.000206382	0.0337259	0.0578853	10.212	-0.000119323	0.0752509
1.67156	0.0351467	0.0217348	0.000389482	10.2972	2.875	2.1875	0	0.000245606	0.0338138	0.0596843	10.2196	-0.000110518	0.0775896
1.67272	0.0350002	0.0217584	0.000394376	10.3067	2.875	2.1875	-0.12628	0.000284952	0.033919	0.0614961	10.2268	-0.000105624	0.079945
1.67388	0.0350002	0.0217789	0.000396267	10.316	2.875	2.1875	0	0.000386933	0.0879147	0.0633216	10.2337	-0.000103733	0.0823181
1.67504	0.0369045	0.021793	0.000391228	10.325	2.875	2.1875	1.64164	0.000489105	0.0880793	0.0651349	10.2403	-0.000108772	0.0846753
1.6762	0.0350002	0.0218022	0.000381071	10.3337	2.875	2.1875	-1.64164	-0.000220905	-0.612078	0.0669368	10.2467	-0.000118929	0.0870179
1.67736	0.0350002	0.0218128	0.000373038	10.3422	2.875	2.1875	0	-0.0001186	0.088194	0.0690748	10.2524	-0.000126962	0.0897972
1.67852	0.0350002	0.0218298	0.00037196	10.351	2.875	2.1875	0	-1.63541e-05	0.0881034	0.0712033	10.2585	-0.00012804	0.0925643
1.67968	0.0351467	0.021856	0.000380553	10.3603	2.875	2.1875	0.12628	8.58841e-05	0.0881897	0.0733234	10.265	-0.000119447	0.0953205
1.68084	0.0344143	0.0218781	0.000385533	10.3691	2.875	2.1875	-0.631398	0.000125671	0.0342853	0.0754362	10.271	-0.000114467	0.0980671
1.682	0.0348537	0.0219034	0.000386598	10.3811	2.875	2.1875	0.378839	0.00047799	0.303723	0.0775694	10.2802	-0.000113402	0.10084
1.68316	0.0351467	0.0219218	0.000381032	10.3924	2.875	2.1875	0.252559	0.000643064	0.142305	0.0795906	10.2889	-0.000118968	0.103468
1.68432	0.0350002	0.0219377	0.000374571	10.4028	2.875	2.1875	-0.12628	0.000683468	0.034831	0.0815808	10.2968	-0.000125429	0.106055
1.68548	0.0350002	0.0219588	0.000373856	10.4135	2.875	2.1875	0	0.000786704	0.0889966	0.0835942	10.3049	-0.000126144	0.108672
1.68664	0.0350002	0.0219889	0.000382813	10.4246	2.875	2.1875	0	0.000890329	0.0893319	0.0856048	10.3133	-0.000117187	0.111286
1.6878	0.0350002	0.0220147	0.000387856	10.4352	2.875	2.1875	0	0.000994395	0.0897121	0.0876136	10.3213	-0.000112144	0.113898
1.68896	0.0350002	0.0220373	0.000389893	10.4454	2.875	2.1875	0	0.00109895	0.0901362	0.0896214	10.3289	-0.000110107	0.116508
1.69012	0.0351467	0.0220529	0.000384997	10.4551	2.875	2.1875	0.12628	0.00120405	0.0906052	0.0916289	10.336	-0.000115003	0.119118
1.69128	0.0351467	0.0220636	0.000375583	10.4642	2.875	2.1875	-2.39272e-14	0.00124726	0.037244	0.093637	10.3425	-0.000124417	0.121728
1.69244	0.0350002	0.0220794	0.000371614	10.4736	2.875	2.1875	-0.12628	0.00129108	0.0377767	0.0956729	10.3492	-0.000128386	0.124375
1.6936	0.0354397	0.0221041	0.000377317	10.4834	2.875	2.1875	0.378839	0.00139803	0.0922017	0.0977375	10.3563	-0.000122683	0.127059
1.69476	0.0352932	0.0221251	0.000379404	10.4928	2.875	2.1875	-0.12628	0.0013182	-0.068825	0.0998048	10.3631	-0.000120596	0.129746
1.69592	0.0348537	0.0221428	0.000378178	10.502	2.875	2.1875	-0.378839	0.00130151	-0.0143879	0.101956	10.3695	-0.000121822	0.132542
1.69708	0.0350002	0.0221526	0.000369108	10.5105	2.875	2.1875	0.12628	0.00147294	0.14779	0.104164	10.3751	-0.000130892	0.135413
1.69824	0.0339748	0.0221575	0.00035521	10.5187	2.875	2.1875	-0.883957	0.00158261	0.094544	0.106351	10.3804	-0.00014479	0.138256
1.6994	0.0351467	0.022166	0.000345237	10.527	2.875	2.1875	1.01024	0.00213053	0.47234	0.108543	10.3859	-0.000154763	0.141106
1.70056	0.0351467	0.0221827	0.000343715	10.5358	2.875	2.1875	0	0.00217954	0.0422543	0.110556	10.392	-0.000156285	0.143723
1.70172	0.0351467	0.0222099	0.000353662	10.545	2.875	2.1875	0	0.00222964	0.0431836	0.112602	10.3986	-0.000146338	0.146383
1.70288	0.0316311	0.0222337	0.000360587	10.5539	2.875	2.1875	-3.03071	0.00228083	0.0441353	0.114683	10.4048	-0.000139413	0.149088
1.70404	0.0351467	0.0222476	0.000358752	10.5614	2.875	2.1875	3.03071	0.00383302	1.33809	0.116799	10.4096	-0.000141248	0.151838
1.7052	0.0352932	0.0222552	0.000350876	10.5684	2.875	2.1875	0.12628	0.00388724	0.046744	0.11831	10.4146	-0.000149124	0.153803
1.70636	0.0351467	0.0222655	0.000345714	10.5756	2.875	2.1875	-0.12628	0.00388089	-0.00547328	0.119857	10.4198	-0.000154286	0.155813
1.70752	0.0351467	0.0222831	0.000348097	10.5832	2.875	2.1875	0	0.00393896	0.0500578	0.121465	10.4253	-0.000151903	0.157905
1.70868	0.0344143	0.022311	0.00036165	10.5913	2.875	2.1875	-0.631398	0.00399897	0.0517379	0.123109	10.4313	-0.00013835	0.160042
1.70984	0.0351467	0.0223356	0.000371882	10.5992	2.875	2.1875	0.631398	0.00437344	0.322816	0.124789	10.437	-0.000128118	0.162225
1.711	0.0351467	0.0223446	0.000368226	10.6051	2.875	2.1875	0	0.0044376	0.0553095	0.12637	10.4408	-0.000131774	0.164281
1.71216	0.0350002	0.0223457	0.000357324	10.6102	2.875	2.1875	-0.12628	0.00450396	0.0572034	0.127986	10.4438	-0.000142676	0.166382
1.71332	0.0357326	0.0223476	0.000347328	10.6152	2.875	2.1875	0.631398	0.00463503	0.112999	0.129638	10.4466	-0.000152672	0.168529
1.71448	0.0350002	0.0223561	0.000344273	10.6206	2.875	2.1875	-0.631398	0.00445594	-0.154396	0.131298	10.4499	-0.000155727	0.170687
1.71564	0.0338283	0.0223744	0.000351178	10.6267	2.875	2.1875	-1.01024	0.00459151	0.116878	0.133099	10.4537	-0.000148822	0.173029
1.7168	0.0350002	0.0223894	0.000356871	10.6318	2.875	2.1875	1.01024	0.00522932	0.54983	0.134908	10.4564	-0.000143129	0.17538
1.71796	0.0347072	0.0223897	0.000348367	10.6354	2.875	2.1875	-0.252559	0.00536976	0.121067	0.136512	10.458	-0.000151633	0.177465
1.71912	0.0350002	0.0223813	0.000331701	10.6382	2.875	2.1875	0.252559	0.00563784	0.231107	0.138123	10.4586	-0.000168299	0.17956
1.72028	0.0351467	0.0223715	0.000313511	10.6409	2.875	2.1875	0.12628	0.00578372	0.125763	0.139689	10.4593	-0.000186489	0.181596
1.72144	0.0350002	0.0223657	0.00029983	10.6437	2.875	2.1875	-0.12628	0.00586998	0.0743569	0.141261	10.46	-0.00020017	0.18364
1.7226	0.0351467	0.0223691	0.000295784	10.647	2.875	2.1875	0.12628	0.00602163	0.130735	0.142867	10.4612	-0.000204216	0.185727
1.72376	0.0355861	0.022384	0.00030379	10.651	2.875	2.1875	0.378839	0.00611377	0.0794293	0.144478	10.4632	-0.00019621	0.187822
1.72492	0.0351467	0.0223953	0.000306331	10.6555	2.875	2.1875	-0.378839	0.00602145	-0.0795853	0.146122	10.4655	-0.000193669	0.189958
1.72608	0.0351467	0.0223965	0.000299482	10.6589	2.875	2.1875	0	0.00611959	0.0846078	0.147877	10.4666	-0.000200518	0.19224
1.72724	0.0351467	0.0223911	0.000288374	10.6608	2.875	2.1875	0	0.00622077	0.0872172	0.149664	10.4663	-0.000211626	0.194563
1.7284	0.0351467	0.0223885	0.000280252	10.6629	2.875	2.1875	0	0.00632502	0.0898716	0.151481	10.466	-0.000219748	0.196926
1.72956	0.0360256	0.0223947	0.000280851	10.6657	2.875	2.1875	0.757678	0.0064324	0.0925707	0.15333	10.4664	-0.000219149	0.199328
1.73072	0.0352932	0.0224129	0.000293493	10.6694	2.875	2.1875	-0.631398	0.006168	-0.227932	0.155208	10.4676	-0.000206507	0.20177
1.73188	0.0354397	0.022428	0.000303383	10.6728	2.875	2.1875	0.12628	0.00621912	0.0440716	0.157275	10.4683	-0.000196617	0.204458
1.73304	0.0345607	0.0224273	0.000298446	10.6744	2.875	2.1875	-0.757678	0.00621083	-0.00715	0.159399	10.4672	-0.000201554	0.207219
1.7342	0.0351467	0.0224192	0.000286228	10.6755	2.875	2.1875	0.505119	0.00658057	0.318747	0.161605	10.4654	-0.000213772	0.210087
1.73536	0.0351467	0.0224126	0.000276089	10.6764	2.875	2.1875	0	0.0067036	0.106056	0.163734	10.4636	-0.000223911	0.212854
1.73652	0.0333889	0.0224128	0.000272857	10.6779	2.875	2.1875	-1.51536	0.00682994	0.108916	0.165891	10.4622	-0.000227143	0.215658
1.73768	0.0342678	0.022423	0.000280757	10.6796	2.875	2.1875	0.757678	0.00770959	0.758322	0.168076	10.4611	-0.000219243	0.218499
1.73884	0.0351467	0.0224322	0.00028892	10.6808	2.875	2.1875	0.757678	0.0082181	0.438365	0.169969	10.4598	-0.00021108	0.22096
1.74	0.0350002	0.0224254	0.000281644	10.6804	2.875	2.1875	-0.12628	0.0083557	0.118625	0.171729	10.4572	-0.000218356	0.223248
1.74116	0.0352932	0.0224097	0.000265872	10.6792	2.875	2.1875	0.252559	0.00855994	0.176065	0.173516	10.4536	-0.000234128	0.225571
1.74232	0.0350002	0.0223941	0.000250355	10.6779	2.875	2.1875	-0.252559	0.00864342	0.0719672	0.175301	10.45	-0.000249645	0.227891
1.74348	0.0348537	0.0223839	0.000240524	10.677	2.875	2.1875	-0.12628	0.00885617	0.183403	0.177137	10.4467	-0.000259476	0.230279
1.74464	0.032217	0.0223842	0.000240904	10.677	2.875	2.1875	-2.27303	0.00913579	0.241057	0.178971	10.4443	-0.000259096	0.232662
1.7458	0.0357326	0.0223966	0.000254213	10.6776	2.875	2.1875	3.03071	0.0105448	1.21469	0.180773	10.4426	-0.000245787	0.235005
1.74696	0.0351467	0.022394	0.000252972	10.6768	2.875	2.1875	-0.505119	0.0104592	-0.0737931	0.182064	10.4401	-0.000247028	0.236684
1.74812	0.0348537	0.0223809	0.000242012	10.6749	2.875	2.1875	-0.252559	0.0106288	0.146166	0.183482	10.4364	-0.000257988	0.238526
1.74928	0.0344143	0.0223654	0.000229484	10.6725	2.875	2.1875	-0.378839	0.0109286	0.25845	0.184918	10.4321	-0.000270516	0.240393
1.75044	0.0351467	0.0223534	0.000220818	10.6702	2.875	2.1875	0.631398	0.0114213	0.424734	0.186317	10.428	-0.000279182	0.242213
1.7516	0.0351467	0.0223499	0.000221448	10.6682	2.875	2.1875	0	0.0116072	0.160235	0.187599	10.4243	-0.000278552	0.243879
1.75276	0.0342678	0.0223579	0.000234393	10.6668	2.875	2.1875	-0.757678	0.0117988	0.165188	0.188894	10.4212	-0.000265607	0.245562
1.75392	0.0345607	0.0223506	0.000232778	10.6639	2.875	2.1875	0.252559	0.0123712	0.493467	0.190201	10.4166	-0.000267222	0.247261
1.75508	0.0350002	0.0223267	0.000215998	10.6591	2.875	2.1875	0.378839	0.0128248	0.390997	0.191358	10.4103	-0.000284002	0.248765
1.75624	0.0352932	0.022299	0.000196126	10.6536	2.875	2.1875	0.252559	0.0130972	0.234845	0.192416	10.4035	-0.000303874	0.250141
1.7574	0.0350002	0.0222725	0.000178288	10.648	2.875	2.1875	-0.252559	0.0132511	0.132684	0.193453	10.3965	-0.000321712	0.251489
1.75856	0.0351467	0.0222533	0.000168213	10.6427	2.875	2.1875	0.12628	0.0135365	0.246086	0.19452	10.3899	-0.000331787	0.252876
1.75972	0.0351467	0.0222453	0.000169522	10.6383	2.875	2.1875	0	0.0137662	0.197986	0.195561	10.384	-0.000330478	0.25423
1.76088	0.0352932	0.0222427	0.000174966	10.6348	2.875	2.1875	0.12628	0.0140027	0.203859	0.196602	10.3792	-0.000325034	0.255582
1.76204	0.0351467	0.0222248	0.000165216	10.63	2.875	2.1875	-0.12628	0.0141836	0.155959	0.197639	10.373	-0.000334784	0.25693
1.7632	0.0350002	0.0222014	0.000151443	10.6241	2.875	2.1875	-0.12628	0.014434	0.215884	0.198696	10.3658	-0.000348557	0.258305
1.76436	0.0351467	0.0221789	0.000139077	10.6182	2.875	2.1875	0.12628	0.0147541	0.275916	0.199745	10.3585	-0.000360923	0.259668
1.76552	0.0355861	0.0221627	0.000133248	10.6127	2.875	2.1875	0.378839	0.015019	0.228337	0.200756	10.3517	-0.000366752	0.260983
1.76668	0.0350002	0.0221573	0.000138785	10.6078	2.875	2.1875	-0.505119	0.0151038	0.0731216	0.201754	10.3455	-0.000361215	0.26228
1.76784	0.0350002	0.0221647	0.000157503	10.6036	2.875	2.1875	0	0.0154461	0.295063	0.202815	10.34	-0.000342497	0.263659
1.769	0.0351467	0.0221563	0.000161622	10.5978	2.875	2.1875	0.12628	0.015796	0.301652	0.20383	10.3328	-0.000338378	0.264979
1.77016	0.0351467	0.0221372	0.00015779	10.5901	2.875	2.1875	0	0.0160912	0.254517	0.204797	10.3238	-0.00034221	0.266237
1.77132	0.0354397	0.0221176	0.000154161	10.5819	2.875	2.1875	0.252559	0.0163944	0.261382	0.20574	10.3145	-0.000345839	0.267462
1.77248	0.0348537	0.0221021	0.000155867	10.5736	2.875	2.1875	-0.505119	0.0165807	0.160628	0.206655	10.305	-0.000344133	0.268651
1.77364	0.0350002	0.022095	0.000167137	10.5655	2.875	2.1875	0.12628	0.0170252	0.383198	0.207593	10.2956	-0.000332863	0.269871
1.7748	0.0352932	0.0220993	0.000191	10.5578	2.875	2.1875	0.252559	0.0174157	0.336588	0.208444	10.2868	-0.000309	0.270977
1.77596	0.0352932	0.0220885	0.00020028	10.5487	2.875	2.1875	0	0.0176898	0.236269	0.209231	10.2767	-0.00029972	0.272
1.77712	0.0352932	0.0220616	0.000194378	10.5379	2.875	2.1875	0	0.0179726	0.243816	0.210005	10.2649	-0.000305622	0.273007
1.77828	0.0350002	0.0220325	0.000186885	10.5267	2.875	2.1875	-0.252559	0.0182643	0.251484	0.210762	10.2527	-0.000313115	0.273991
1.77944	0.0352932	0.022006	0.000182931	10.5153	2.875	2.1875	0.252559	0.0186901	0.367024	0.2115	10.2404	-0.000317069	0.274949
1.7806	0.0354397	0.0219882	0.000187649	10.5046	2.875	2.1875	0.12628	0.0190001	0.267249	0.21216	10.2288	-0.000312351	0.275808
1.78176	0.0351467	0.0219817	0.000204667	10.4945	2.875	2.1875	-0.252559	0.019257	0.221481	0.212793	10.2178	-0.000295333	0.276631
1.78292	0.0351467	0.0219746	0.000221608	10.484	2.875	2.1875	0	0.0196484	0.337445	0.213421	10.2065	-0.000278392	0.277448
1.78408	0.0361721	0.0219519	0.000224284	10.4717	2.875	2.1875	0.883957	0.0200496	0.345828	0.213989	10.1935	-0.000275716	0.278185
1.78524	0.0350002	0.0219263	0.000223873	10.4594	2.875	2.1875	-1.01024	0.0200232	-0.0227388	0.214491	10.1805	-0.000276127	0.278838
1.7864	0.0350002	0.0219021	0.000225509	10.4468	2.875	2.1875	0	0.0205067	0.416798	0.21511	10.1672	-0.000274491	0.279643
1.78756	0.0352932	0.0218844	0.000234631	10.4344	2.875	2.1875	0.252559	0.0210003	0.425547	0.21563	10.154	-0.000265369	0.280319
1.78872	0.0351467	0.0218771	0.000255168	10.4223	2.875	2.1875	-0.12628	0.0213794	0.326757	0.216045	10.1415	-0.000244832	0.280859
1.78988	0.0352932	0.0218684	0.000275352	10.4097	2.875	2.1875	0.12628	0.0218315	0.389753	0.216406	10.1284	-0.000224648	0.281328
1.79104	0.0354397	0.0218439	0.000280694	10.3955	2.875	2.1875	0.12628	0.0222319	0.345192	0.216682	10.1138	-0.000219306	0.281686
1.7922	0.0352932	0.0218088	0.00027905	10.379	2.875	2.1875	-0.12628	0.0225808	0.300803	0.216893	10.097	-0.00022095	0.281961
1.79336	0.0352932	0.0217736	0.00027797	10.3622	2.875	2.1875	0	0.0230034	0.364311	0.217063	10.08	-0.00022203	0.282182
1.79452	0.0351467	0.0217436	0.00028289	10.3454	2.875	2.1875	-0.12628	0.0234374	0.374124	0.21716	10.0631	-0.00021711	0.282308
1.79568	0.0407131	0.0217233	0.000298043	10.3292	2.875	2.1875	4.79863	0.0239455	0.437998	0.21718	10.0469	-0.000201957	0.282334
1.79684	0.0360256	0.0217034	0.000314676	10.3126	2.875	2.1875	-4.04095	0.0220906	-1.59901	0.21709	10.0304	-0.000185324	0.282217
1.798	0.0358791	0.0216685	0.00031709	10.2944	2.875	2.1875	-0.12628	0.0222465	0.134392	0.217899	10.0112	-0.00018291	0.283269
1.79916	0.0354397	0.0216223	0.000308911	10.2752	2.875	2.1875	-0.378839	0.0224759	0.197758	0.218749	9.99082	-0.000191089	0.284374
1.80032	0.0352932	0.0215753	0.000300405	10.2556	2.875	2.1875	-0.12628	0.0229039	0.36897	0.21961	9.97013	-0.000199595	0.285493
1.80148	0.0352932	0.0215325	0.000297005	10.236	2.875	2.1875	0	0.0234058	0.432615	0.220397	9.94951	-0.000202995	0.286516
1.80264	0.0354397	0.0214987	0.000303239	10.2169	2.875	2.1875	0.12628	0.0239192	0.442601	0.221078	9.92948	-0.000196761	0.287402
1.8038	0.0352932	0.02147	0.000313071	10.1987	2.875	2.1875	-0.12628	0.024382	0.398931	0.221651	9.9106	-0.000186929	0.288146
1.80496	0.0354397	0.0214404	0.00032288	10.1801	2.875	2.1875	0.12628	0.0249193	0.463208	0.222135	9.89137	-0.00017712	0.288775
1.80612	0.0347072	0.0213979	0.000321192	10.16	2.875	2.1875	-0.631398	0.0254064	0.419964	0.2225	9.87076	-0.000178808	0.28925
1.80728	0.0352932	0.0213517	0.000317069	10.1391	2.875	2.1875	0.505119	0.0262186	0.700175	0.222767	9.84946	-0.000182931	0.289598
1.80844	0.0355861	0.0213075	0.00031655	10.1176	2.875	2.1875	0.252559	0.0267938	0.495864	0.222798	9.82795	-0.00018345	0.289638
1.8096	0.0354397	0.0212707	0.000324468	10.0963	2.875	2.1875	-0.12628	0.0272573	0.399546	0.222694	9.80677	-0.000175532	0.289503
1.81076	0.0355861	0.0212447	0.00034445	10.0752	2.875	2.1875	0.12628	0.0277968	0.465048	0.222503	9.78599	-0.00015555	0.289254
1.81192	0.0355861	0.0212175	0.000364425	10.0537	2.875	2.1875	0	0.0282875	0.423033	0.222191	9.76484	-0.000135575	0.288849
1.81308	0.0355861	0.0211741	0.000369299	10.0304	2.875	2.1875	0	0.0287922	0.435102	0.22178	9.74208	-0.000130701	0.288314
1.81424	0.0348537	0.0211212	0.000367533	10.0051	2.875	2.1875	-0.631398	0.0293112	0.447385	0.221264	9.7175	-0.000132467	0.287643
1.8154	0.0357326	0.0210692	0.000367584	9.97961	2.875	2.1875	0.757678	0.0301571	0.729261	0.220635	9.69279	-0.000132416	0.286826
1.81656	0.0355861	0.0210242	0.000374888	9.95452	2.875	2.1875	-0.12628	0.030643	0.418881	0.219755	9.66884	-0.000125112	0.285682
1.81772	0.0357326	0.0209897	0.000392772	9.93027	2.875	2.1875	0.12628	0.0312066	0.485829	0.218776	9.64586	-0.000107228	0.284409
1.81888	0.0358791	0.0209535	0.00041037	9.90524	2.875	2.1875	0.12628	0.0317231	0.445268	0.217665	9.62227	-8.96302e-05	0.282965
1.82004	0.036465	0.0209021	0.000414401	9.87837	2.875	2.1875	0.505119	0.0321928	0.404928	0.216442	9.597	-8.55993e-05	0.281374
1.8212	0.0358791	0.0208401	0.000409095	9.85015	2.875	2.1875	-0.505119	0.0324285	0.203165	0.215125	9.57049	-9.0905e-05	0.279663
1.82236	0.0358791	0.0207775	0.000404116	9.82145	2.875	2.1875	0	0.0329302	0.432497	0.213814	9.54349	-9.58839e-05	0.277958
1.82352	0.0358791	0.0207195	0.000404596	9.79282	2.875	2.1875	0	0.0334482	0.446546	0.212395	9.51671	-9.54038e-05	0.276114
1.82468	0.0360256	0.0206714	0.000415067	9.7649	2.875	2.1875	0.12628	0.0339827	0.460816	0.21086	9.49079	-8.49334e-05	0.274118
1.82584	0.0361721	0.0206216	0.00042496	9.7364	2.875	2.1875	0.12628	0.0344716	0.42144	0.209201	9.46444	-7.50396e-05	0.271962
1.827	0.0360256	0.0205707	0.000434887	9.70734	2.875	2.1875	-0.12628	0.034915	0.382272	0.207438	9.43768	-6.51133e-05	0.269669
1.82816	0.0363186	0.0205091	0.000434882	9.67709	2.875	2.1875	0.252559	0.0354382	0.451041	0.205587	9.40983	-6.51175e-05	0.267264
1.82932	0.0360256	0.020445	0.000433405	9.64629	2.875	2.1875	-0.252559	0.035854	0.358412	0.203616	9.38159	-6.65946e-05	0.2647
1.83048	0.0363186	0.0203844	0.000435892	9.61549	2.875	2.1875	0.252559	0.0364125	0.481457	0.201567	9.35346	-6.41083e-05	0.262038
1.83164	0.0361721	0.0203318	0.000446873	9.5852	2.875	2.1875	-0.12628	0.036864	0.389242	0.199381	9.32601	-5.31266e-05	0.259195
1.8328	0.0357326	0.0202784	0.000457294	9.55468	2.875	2.1875	-0.378839	0.0373962	0.458844	0.1971	9.29845	-4.27058e-05	0.25623
1.83396	0.036465	0.0202237	0.000467462	9.52365	2.875	2.1875	0.631398	0.0381345	0.636422	0.194689	9.27055	-3.25385e-05	0.253096
1.83512	0.0374904	0.0201577	0.000467412	9.4913	2.875	2.1875	0.883957	0.0385791	0.383319	0.19206	9.24162	-3.25876e-05	0.249679
1.83628	0.0361721	0.0200834	0.000460772	9.4576	2.875	2.1875	-1.13652	0.0386054	0.0226578	0.189337	9.21147	-3.92285e-05	0.246138
1.83744	0.0366115	0.0200112	0.000455993	9.42411	2.875	2.1875	0.378839	0.0392133	0.523997	0.186696	9.1814	-4.40068e-05	0.242704
1.8386	0.036758	0.0199459	0.000458814	9.39095	2.875	2.1875	0.12628	0.039653	0.379103	0.183888	9.15189	-4.1186e-05	0.239054
1.83976	0.0366115	0.0198793	0.000461684	9.35706	2.875	2.1875	-0.12628	0.0400499	0.342146	0.180983	9.12178	-3.83159e-05	0.235278
1.84092	0.036465	0.0198115	0.000464605	9.32259	2.875	2.1875	-0.12628	0.0405291	0.413107	0.177999	9.09119	-3.53952e-05	0.231398
1.84208	0.0379299	0.0197325	0.000458818	9.28623	2.875	2.1875	1.2628	0.0410909	0.484272	0.174898	9.05886	-4.11821e-05	0.227367
1.84324	0.037051	0.0196448	0.000444623	9.24902	2.875	2.1875	-0.757678	0.041048	-0.0369405	0.171644	9.02589	-5.53772e-05	0.223137
1.8444	0.0371975	0.0195578	0.00043198	9.21159	2.875	2.1875	0.12628	0.0414005	0.303816	0.168493	8.99255	-6.80199e-05	0.219041
1.84556	0.0371975	0.0194769	0.000425716	9.17444	2.875	2.1875	0	0.0417109	0.267605	0.165276	8.95958	-7.42836e-05	0.214859
1.84672	0.037051	0.0194057	0.000429756	9.13786	2.875	2.1875	-0.12628	0.0420419	0.285401	0.162008	8.92725	-7.02445e-05	0.21061
1.84788	0.0374904	0.0193338	0.000433225	9.10113	2.875	2.1875	0.378839	0.0424563	0.35721	0.158678	8.89485	-6.67746e-05	0.206282
1.84904	0.0374904	0.0192619	0.000438242	9.06381	2.875	2.1875	0	0.0427042	0.213701	0.155251	8.86198	-6.1758e-05	0.201826
1.8502	0.0374904	0.019181	0.000434538	9.02565	2.875	2.1875	0	0.0429732	0.23192	0.151794	8.82831	-6.54619e-05	0.197333
1.85136	0.0376369	0.0190989	0.000429965	8.98726	2.875	2.1875	0.12628	0.0432635	0.250253	0.148298	8.79447	-7.00348e-05	0.192788
1.85252	0.0366115	0.0190216	0.00043026	8.94922	2.875	2.1875	-0.883957	0.0435127	0.214836	0.144752	8.76104	-6.97399e-05	0.188177
1.85368	0.0377834	0.0189533	0.00043935	8.91196	2.875	2.1875	1.01024	0.0442209	0.61052	0.14117	8.72844	-6.06503e-05	0.183521
1.85484	0.0363186	0.0188834	0.000447573	8.87427	2.875	2.1875	-1.2628	0.0444511	0.198392	0.137357	8.69571	-5.24273e-05	0.178564
1.856	0.036758	0.018813	0.000455537	8.83647	2.875	2.1875	0.378839	0.0453281	0.756098	0.133513	8.6629	-4.44627e-05	0.173567
1.85716	0.0374904	0.0187331	0.000454488	8.7977	2.875	2.1875	0.631398	0.0460402	0.613814	0.129361	8.62953	-4.55121e-05	0.168169
1.85832	0.0380764	0.0186458	0.000446236	8.75824	2.875	2.1875	0.505119	0.0464625	0.364084	0.124969	8.59578	-5.37639e-05	0.16246
1.85948	0.0382229	0.0185615	0.000441652	8.71876	2.875	2.1875	0.12628	0.0466579	0.168409	0.12046	8.56217	-5.83479e-05	0.156597
1.86064	0.0382229	0.0184853	0.000444962	8.68004	2.875	2.1875	0	0.0468138	0.134441	0.115926	8.52934	-5.50379e-05	0.150704
1.8618	0.0383693	0.0184073	0.000446502	8.64114	2.875	2.1875	0.12628	0.0469929	0.154413	0.111383	8.49634	-5.34977e-05	0.144798
1.86296	0.0385158	0.018329	0.000447783	8.60216	2.875	2.1875	0.12628	0.0471328	0.120586	0.106819	8.4633	-5.22166e-05	0.138865
1.86412	0.0386623	0.0182565	0.000450015	8.5657	2.875	2.1875	0.12628	0.0472335	0.0868207	0.102248	8.43278	-4.99855e-05	0.132922
1.86528	0.0386623	0.018177	0.000444739	8.52885	2.875	2.1875	0	0.0472951	0.0530966	0.0976846	8.40186	-5.52609e-05	0.12699
1.86644	0.0388088	0.0181	0.000441318	8.49248	2.875	2.1875	0.12628	0.0473801	0.073275	0.0931433	8.37139	-5.86818e-05	0.121086
1.8676	0.0388088	0.0180297	0.000443979	8.4569	2.875	2.1875	0	0.0474261	0.0396138	0.0886119	8.3417	-5.6021e-05	0.115195
1.86876	0.0380764	0.0179564	0.000443963	8.42096	2.875	2.1875	-0.631398	0.0474955	0.0598474	0.0841047	8.31162	-5.60368e-05	0.109336
1.86992	0.0386623	0.0178832	0.000443083	8.38538	2.875	2.1875	0.505119	0.0479009	0.349481	0.0796096	8.28188	-5.69169e-05	0.103492
1.87108	0.0393947	0.0178153	0.000447681	8.35019	2.875	2.1875	0.631398	0.04808	0.154421	0.0749808	8.25271	-5.23186e-05	0.0974751
1.87224	0.0391018	0.0177404	0.000444772	8.31465	2.875	2.1875	-0.252559	0.0479705	-0.0944397	0.0703128	8.22325	-5.5228e-05	0.0914067
1.8734	0.0391018	0.0176664	0.000442207	8.27937	2.875	2.1875	0	0.0480096	0.033775	0.0657263	8.19392	-5.77931e-05	0.0854442
1.87456	0.0398342	0.0175979	0.00044512	8.24458	2.875	2.1875	0.631398	0.0480726	0.0542578	0.0611556	8.16507	-5.48801e-05	0.0795023
1.87572	0.0393947	0.0175265	0.000444451	8.20984	2.875	2.1875	-0.378839	0.0478468	-0.194606	0.0565883	8.13627	-5.55495e-05	0.0735648
1.87688	0.0392482	0.0174538	0.000442313	8.17501	2.875	2.1875	-0.12628	0.0478323	-0.0125698	0.0521454	8.10722	-5.76869e-05	0.067789
1.87804	0.0395412	0.0173856	0.00044505	8.14043	2.875	2.1875	0.252559	0.0479038	0.0617112	0.0477344	8.07838	-5.49505e-05	0.0620548
1.8792	0.0396877	0.0173104	0.000440277	8.10554	2.875	2.1875	0.12628	0.0478741	-0.0256	0.0433166	8.04923	-5.9723e-05	0.0563116
1.88036	0.0395412	0.0172302	0.000429805	8.07048	2.875	2.1875	-0.12628	0.0478056	-0.05905	0.0389328	8.01987	-7.01946e-05	0.0506127
1.88152	0.0398342	0.017155	0.000423597	8.03615	2.875	2.1875	0.252559	0.0478233	0.015219	0.0345976	7.99118	-7.64025e-05	0.0449769
1.88268	0.0398342	0.0170885	0.000418025	8.00582	2.875	2.1875	0	0.0477396	-0.0721267	0.0302719	7.96646	-8.19745e-05	0.0393535
1.88384	0.0398342	0.0170204	0.000410066	7.97566	2.875	2.1875	0	0.0476796	-0.0517595	0.0259969	7.94187	-8.9934e-05	0.033796
1.885	0.0405666	0.0169554	0.00040485	7.94593	2.875	2.1875	0.631398	0.0476431	-0.031419	0.0217604	7.91764	-9.51498e-05	0.0282885
1.88616	0.0401272	0.0168987	0.000406604	7.91738	2.875	2.1875	-0.378839	0.0473178	-0.280464	0.0175502	7.89457	-9.33959e-05	0.0228153
1.88732	0.0401272	0.0168363	0.00040234	7.88854	2.875	2.1875	0	0.0472034	-0.0986543	0.0134875	7.87101	-9.76597e-05	0.0175338
1.88848	0.0404201	0.0167773	0.000400816	7.86023	2.875	2.1875	0.252559	0.0471123	-0.0785155	0.0094803	7.84791	-9.91838e-05	0.0123244
1.88964	0.0399807	0.0167256	0.000406562	7.83249	2.875	2.1875	-0.378839	0.0469195	-0.166165	0.00551664	7.82532	-9.3438e-05	0.00717163
1.8908	0.0379299	0.0166693	0.000409311	7.80376	2.875	2.1875	-1.76791	0.0469375	0.015475	0.00163794	7.80163	-9.06894e-05	0.00212932
1.89196	0.0404201	0.0166125	0.000411178	7.77509	2.875	2.1875	2.14675	0.0478536	0.789741	-0.00224761	7.77801	-8.88223e-05	-0.00292189
1.89312	0.0405666	0.0165625	0.000419414	7.74717	2.875	2.1875	0.12628	0.047731	-0.105708	-0.0065251	7.75565	-8.05864e-05	-0.00848263
1.89428	0.0405666	0.016507	0.000421638	7.71902	2.875	2.1875	0	0.0475695	-0.139218	-0.0107535	7.733	-7.83618e-05	-0.0139796
1.89544	0.0405666	0.0164505	0.000423289	7.69061	2.875	2.1875	0	0.0474315	-0.118924	-0.0149183	7.71	-7.67106e-05	-0.0193938
1.8966	0.0405666	0.0164001	0.000430409	7.66299	2.875	2.1875	0	0.047317	-0.0986888	-0.0190317	7.68773	-6.95908e-05	-0.0247412
1.89776	0.0408596	0.0163463	0.000433638	7.63526	2.875	2.1875	0.252559	0.047226	-0.0785017	-0.0231056	7.6653	-6.63625e-05	-0.0300373
1.89892	0.0405666	0.0162917	0.000435392	7.60775	2.875	2.1875	-0.252559	0.0470333	-0.166103	-0.0271522	7.64305	-6.46077e-05	-0.0352978
1.90008	0.0405666	0.0162433	0.000442924	7.58087	2.875	2.1875	0	0.0469889	-0.0382879	-0.0311299	7.62134	-5.70762e-05	-0.0404689
1.90124	0.0410061	0.0161894	0.000444153	7.55395	2.875	2.1875	0.378839	0.0469677	-0.0182414	-0.0351042	7.59959	-5.58466e-05	-0.0456354
1.9024	0.0407131	0.0161314	0.000440894	7.52682	2.875	2.1875	-0.252559	0.0467823	-0.159827	-0.0390867	7.57763	-5.91059e-05	-0.0508127
1.90356	0.0411525	0.0160791	0.000442206	7.50063	2.875	2.1875	0.378839	0.0467451	-0.032119	-0.0430095	7.55654	-5.77939e-05	-0.0559124
1.90472	0.0410061	0.0160223	0.000439028	7.47405	2.875	2.1875	-0.12628	0.0465435	-0.1738	-0.0469377	7.53507	-6.09718e-05	-0.0610191
1.90588	0.0411525	0.0159636	0.000433473	7.44754	2.875	2.1875	0.12628	0.0464274	-0.100068	-0.0508032	7.51359	-6.65268e-05	-0.0660441
1.90704	0.0411525	0.0159109	0.00043309	7.42183	2.875	2.1875	0	0.0462718	-0.134136	-0.0546442	7.49287	-6.69101e-05	-0.0710374
1.9082	0.0401272	0.0158665	0.000440899	7.39684	2.875	2.1875	-0.883957	0.0461391	-0.114395	-0.0584459	7.47282	-5.91014e-05	-0.0759797
1.90936	0.0440822	0.0158178	0.000443613	7.37182	2.875	2.1875	3.40955	0.0464667	0.282409	-0.0622199	7.4527	-5.63874e-05	-0.0808859
1.91052	0.0414455	0.015774	0.000449993	7.34773	2.875	2.1875	-2.27303	0.0451299	-1.15237	-0.0661645	7.43374	-5.0007e-05	-0.0860138
1.91168	0.0414455	0.0157253	0.000450981	7.32341	2.875	2.1875	0	0.0449404	-0.163382	-0.0695715	7.41385	-4.90187e-05	-0.0904429
1.91284	0.041592	0.0156733	0.000448692	7.29886	2.875	2.1875	0.12628	0.0447731	-0.144209	-0.0729321	7.39367	-5.13077e-05	-0.0948117
1.914	0.041592	0.015626	0.000450676	7.27481	2.875	2.1875	0	0.0445655	-0.178982	-0.0762574	7.37395	-4.93238e-05	-0.0991346
1.91516	0.0417385	0.0155871	0.000460257	7.25181	2.875	2.1875	0.12628	0.0443799	-0.159969	-0.0795318	7.3552	-3.97432e-05	-0.103391
1.91632	0.0417385	0.0155435	0.00046445	7.22868	2.875	2.1875	0	0.0441538	-0.19491	-0.0827665	7.33628	-3.55498e-05	-0.107596
1.91748	0.041592	0.0154975	0.000468998	7.20423	2.875	2.1875	-0.12628	0.0439496	-0.176072	-0.0859457	7.31596	-3.10023e-05	-0.111729
1.91864	0.0405666	0.0154466	0.000468465	7.1795	2.875	2.1875	-0.883957	0.0438296	-0.103447	-0.0890803	7.29531	-3.15355e-05	-0.115804
1.9198	0.0398342	0.0153909	0.000463757	7.1541	2.875	2.1875	-0.631398	0.0441688	0.292371	-0.0922077	7.27397	-3.62434e-05	-0.11987
1.92096	0.0420315	0.0153382	0.000461215	7.12927	2.875	2.1875	1.89419	0.0448422	0.580586	-0.0955255	7.25345	-3.87853e-05	-0.124183
1.92212	0.0420315	0.0152932	0.00046567	7.10536	2.875	2.1875	0	0.0446005	-0.208397	-0.0991779	7.23429	-3.43296e-05	-0.128931
1.92328	0.0420315	0.0152442	0.00046595	7.0812	2.875	2.1875	0	0.0443808	-0.18937	-0.102776	7.2148	-3.405e-05	-0.133609
1.92444	0.0434963	0.0151917	0.000462658	7.05681	2.875	2.1875	1.2628	0.0441831	-0.170436	-0.106332	7.19504	-3.73423e-05	-0.138231
1.9256	0.0423244	0.0151448	0.000463947	7.03327	2.875	2.1875	-1.01024	0.0433823	-0.690328	-0.109855	7.17609	-3.60527e-05	-0.142812
1.92676	0.0421779	0.0150935	0.000460154	7.00967	2.875	2.1875	-0.12628	0.043103	-0.240827	-0.113092	7.15669	-3.98463e-05	-0.147019
1.92792	0.0423244	0.0150402	0.000454598	6.9858	2.875	2.1875	0.12628	0.0429074	-0.168564	-0.116265	7.13695	-4.54024e-05	-0.151145
1.92908	0.0424709	0.0149933	0.000454828	6.9627	2.875	2.1875	0.12628	0.0426706	-0.204132	-0.119413	7.11793	-4.51722e-05	-0.155236
1.93024	0.0427639	0.0149564	0.000464469	6.94063	2.875	2.1875	0.252559	0.0423925	-0.239803	-0.122518	7.0999	-3.55312e-05	-0.159273
1.9314	0.0423244	0.0149162	0.000469933	6.91867	2.875	2.1875	-0.378839	0.0420103	-0.329465	-0.125565	7.0819	-3.00668e-05	-0.163235
1.93256	0.0448147	0.0148803	0.000478473	6.89752	2.875	2.1875	2.14675	0.0418364	-0.149919	-0.128512	7.06458	-2.15272e-05	-0.167065
1.93372	0.0426174	0.0148389	0.000480728	6.87629	2.875	2.1875	-1.89419	0.0406208	-1.04793	-0.131448	7.04717	-1.92719e-05	-0.170882
1.93488	0.0440822	0.0147945	0.000479419	6.85503	2.875	2.1875	1.2628	0.0403627	-0.22249	-0.13393	7.02914	-2.05811e-05	-0.174109
1.93604	0.0426174	0.0147558	0.000483002	6.83454	2.875	2.1875	-1.2628	0.0394996	-0.744013	-0.136369	7.01182	-1.69981e-05	-0.177279
1.9372	0.0427639	0.014726	0.000494802	6.81509	2.875	2.1875	0.12628	0.0392811	-0.188417	-0.138507	6.99515	-5.19833e-06	-0.180058
1.93836	0.0429104	0.0146922	0.000502138	6.7955	2.875	2.1875	0.12628	0.0390195	-0.225534	-0.14062	6.97831	2.13759e-06	-0.182806
1.93952	0.0427639	0.0146563	0.000506222	6.77617	2.875	2.1875	-0.12628	0.0387147	-0.262761	-0.142691	6.96167	6.22155e-06	-0.185498
1.94068	0.0429104	0.0146135	0.000502827	6.7566	2.875	2.1875	0.12628	0.0384915	-0.192371	-0.144702	6.94471	2.8268e-06	-0.188113
1.94184	0.0427639	0.0145673	0.000494972	6.73717	2.875	2.1875	-0.12628	0.0382249	-0.229823	-0.14669	6.92786	-5.02778e-06	-0.190698
1.943	0.0417385	0.0145258	0.000491414	6.71826	2.875	2.1875	-0.883957	0.0380397	-0.159641	-0.148637	6.91148	-8.58649e-06	-0.193229
1.94416	0.0432033	0.0144928	0.000496076	6.70017	2.875	2.1875	1.2628	0.0383108	0.233708	-0.150579	6.89592	-3.92436e-06	-0.195753
1.94532	0.0432033	0.0144561	0.000497785	6.68142	2.875	2.1875	0	0.037976	-0.288691	-0.152711	6.87994	-2.21513e-06	-0.198524
1.94648	0.0432033	0.0144166	0.00049624	6.66272	2.875	2.1875	0	0.0376599	-0.272489	-0.154775	6.86392	-3.76001e-06	-0.201207
1.94764	0.0432033	0.01437	0.000486909	6.6437	2.875	2.1875	0	0.0373624	-0.256422	-0.156781	6.84751	-1.30906e-05	-0.203815
1.9488	0.0430568	0.014319	0.000472205	6.62469	2.875	2.1875	-0.12628	0.0370835	-0.240483	-0.158738	6.83105	-2.77951e-05	-0.206359
1.94996	0.0433498	0.0142712	0.000460275	6.60618	2.875	2.1875	0.252559	0.0368853	-0.170788	-0.160654	6.81503	-3.97252e-05	-0.20885
1.95112	0.0452541	0.0142316	0.000455644	6.58866	2.875	2.1875	1.64164	0.0365805	-0.2628	-0.162566	6.79999	-4.43561e-05	-0.211335
1.95228	0.0433498	0.0142032	0.000461633	6.57223	2.875	2.1875	-1.64164	0.0354813	-0.947559	-0.164427	6.78599	-3.83674e-05	-0.213755
1.95344	0.0432033	0.0141722	0.000463745	6.5562	2.875	2.1875	-0.12628	0.0352121	-0.232057	-0.165901	6.77187	-3.62548e-05	-0.215672
1.9546	0.0437893	0.0141331	0.000457452	6.53959	2.875	2.1875	0.505119	0.0350229	-0.163159	-0.167343	6.75714	-4.25481e-05	-0.217546
1.95576	0.0434963	0.0140888	0.000444562	6.52315	2.875	2.1875	-0.252559	0.034601	-0.363716	-0.168786	6.74258	-5.54381e-05	-0.219422
1.95692	0.0440822	0.0140453	0.000432318	6.50685	2.875	2.1875	0.505119	0.0343212	-0.241205	-0.170133	6.72802	-6.76818e-05	-0.221173
1.95808	0.0429104	0.0140083	0.000426152	6.49123	2.875	2.1875	-1.01024	0.0338084	-0.442059	-0.171445	6.71411	-7.38483e-05	-0.222879
1.95924	0.0439357	0.0139814	0.000429986	6.47647	2.875	2.1875	0.883957	0.0338123	0.00335862	-0.172623	6.70088	-7.00139e-05	-0.22441
1.9604	0.0437893	0.0139505	0.000430533	6.46107	2.875	2.1875	-0.12628	0.0333954	-0.359337	-0.173888	6.68712	-6.94672e-05	-0.226055
1.96156	0.0436428	0.0139172	0.000422355	6.44814	2.875	2.1875	-0.12628	0.0330576	-0.291215	-0.175062	6.67572	-7.76449e-05	-0.22758
1.96272	0.0434963	0.0138769	0.000406959	6.43468	2.875	2.1875	-0.12628	0.0327987	-0.223238	-0.176177	6.66371	-9.30408e-05	-0.22903
1.96388	0.0439357	0.0138327	0.000389775	6.42009	2.875	2.1875	0.378839	0.0326184	-0.15537	-0.17727	6.65054	-0.000110225	-0.230451
1.96504	0.0439357	0.0137937	0.000377438	6.40605	2.875	2.1875	0	0.0322669	-0.303078	-0.178373	6.63794	-0.000122562	-0.231885
1.9662	0.0439357	0.0137642	0.000374172	6.3929	2.875	2.1875	0	0.0319313	-0.289311	-0.179415	6.62614	-0.000125828	-0.233239
1.96736	0.0440822	0.0137465	0.000378766	6.38232	2.875	2.1875	0.12628	0.0316115	-0.275689	-0.180402	6.61684	-0.000121234	-0.234522
1.96852	0.0455471	0.0137267	0.00038035	6.37195	2.875	2.1875	1.2628	0.0312448	-0.316077	-0.181342	6.60769	-0.00011965	-0.235745
1.96968	0.0440822	0.0136994	0.000373487	6.36137	2.875	2.1875	-1.2628	0.0302687	-0.84149	-0.182215	6.59825	-0.000126513	-0.23688
1.97084	0.0439357	0.0136669	0.000360589	6.35076	2.875	2.1875	-0.12628	0.0299325	-0.289834	-0.182762	6.58836	-0.000139411	-0.237591
1.972	0.0440822	0.0136378	0.000351015	6.34042	2.875	2.1875	0.12628	0.0296736	-0.223189	-0.183257	6.57865	-0.000148985	-0.238234
1.97316	0.0442287	0.0136171	0.00034929	6.33098	2.875	2.1875	0.12628	0.0293669	-0.264403	-0.183731	6.56983	-0.00015071	-0.23885
1.97432	0.0442287	0.0136081	0.000359038	6.32257	2.875	2.1875	0	0.0290122	-0.30575	-0.184165	6.56199	-0.000140962	-0.239415
1.97548	0.0440822	0.0135965	0.000365765	6.31407	2.875	2.1875	-0.12628	0.0286719	-0.293372	-0.18454	6.55397	-0.000134235	-0.239902
1.97664	0.0432033	0.0135754	0.000363132	6.3048	2.875	2.1875	-0.757678	0.0284083	-0.227266	-0.18486	6.54512	-0.000136868	-0.240318
1.9778	0.0443752	0.0135479	0.000353855	6.29514	2.875	2.1875	1.01024	0.0285337	0.1081	-0.18516	6.53584	-0.000146145	-0.240707
1.97896	0.0443752	0.013523	0.000346992	6.28578	2.875	2.1875	0	0.0281732	-0.310721	-0.185604	6.52707	-0.000153008	-0.241285
1.98012	0.0442287	0.0135066	0.000347675	6.27743	2.875	2.1875	-0.12628	0.0278267	-0.298702	-0.185987	6.51921	-0.000152325	-0.241783
1.98128	0.0442287	0.0135015	0.000359225	6.27019	2.875	2.1875	0	0.0275565	-0.232955	-0.186314	6.5124	-0.000140775	-0.242208
1.98244	0.0465725	0.0134943	0.000367151	6.26336	2.875	2.1875	2.02047	0.0272999	-0.2212	-0.186617	6.50597	-0.000132849	-0.242603
1.9836	0.0442287	0.0134733	0.00036028	6.25592	2.875	2.1875	-2.02047	0.0260569	-1.07154	-0.186904	6.4989	-0.00013972	-0.242975
1.98476	0.0445217	0.013445	0.000345858	6.24798	2.875	2.1875	0.252559	0.0258267	-0.198435	-0.186753	6.49076	-0.000154142	-0.242779
1.98592	0.0445217	0.0134182	0.000331731	6.24061	2.875	2.1875	0	0.0254844	-0.295166	-0.186596	6.48318	-0.000168269	-0.242575
1.98708	0.0445217	0.0133978	0.000323632	6.23395	2.875	2.1875	0	0.0251546	-0.284294	-0.186385	6.47625	-0.000176368	-0.242301
1.98824	0.0445217	0.0133881	0.000326087	6.22821	2.875	2.1875	0	0.0248372	-0.273562	-0.186126	6.47017	-0.000173913	-0.241964
1.9894	0.0445217	0.013392	0.000341212	6.22385	2.875	2.1875	0	0.0245322	-0.262966	-0.185824	6.46542	-0.000158788	-0.241571
1.99056	0.0445217	0.0133814	0.000341829	6.21843	2.875	2.1875	0	0.0242393	-0.2525	-0.185483	6.45956	-0.000158171	-0.241128
1.99172	0.0424709	0.0133626	0.000333981	6.21243	2.875	2.1875	-1.76791	0.0239584	-0.242159	-0.18511	6.45307	-0.000166019	-0.240642
1.99288	0.0426174	0.0133427	0.000324911	6.20641	2.875	2.1875	0.12628	0.0245643	0.522303	-0.184708	6.44653	-0.000175089	-0.24012
1.99404	0.0448147	0.0133272	0.000320053	6.2008	2.875	2.1875	1.89419	0.0251198	0.478909	-0.184656	6.44085	-0.000179947	-0.240052
1.9952	0.0446682	0.0133212	0.000324237	6.19611	2.875	2.1875	-0.12628	0.0247504	-0.31849	-0.184932	6.43653	-0.000175763	-0.240411
1.99636	0.0448147	0.0133274	0.000340788	6.19233	2.875	2.1875	0.12628	0.0244557	-0.254056	-0.185142	6.43301	-0.000159212	-0.240685
1.99752	0.0448147	0.0133213	0.000344946	6.18764	2.875	2.1875	0	0.0241106	-0.297497	-0.185318	6.42855	-0.000155054	-0.240914
1.99868	0.0448147	0.013303	0.00033792	6.18154	2.875	2.1875	0	0.0237774	-0.28721	-0.185439	6.42261	-0.00016208	-0.241071
1.99984	0.0446682	0.0132817	0.000327561	6.17539	2.875	2.1875	-0.12628	0.023456	-0.277066	-0.185509	6.41655	-0.000172439	-0.241162
2.001	0.0449611	0.0132636	0.000319905	6.16966	2.875	2.1875	0.252559	0.0232087	-0.213185	-0.185534	6.41085	-0.000180095	-0.241194
2.00216	0.0430568	0.0132541	0.000320083	6.1649	2.875	2.1875	-1.64164	0.0228479	-0.311033	-0.185545	6.40611	-0.000179917	-0.241209
2.00332	0.0449611	0.0132564	0.000332021	6.16112	2.875	2.1875	1.64164	0.0233108	0.399082	-0.185494	6.40226	-0.000167979	-0.241143
2.00448	0.0434963	0.0132576	0.00034153	6.1578	2.875	2.1875	-1.2628	0.0229729	-0.29134	-0.185733	6.39925	-0.00015847	-0.241453
2.00564	0.0449611	0.0132441	0.000336229	6.15336	2.875	2.1875	1.2628	0.0232712	0.257204	-0.185919	6.39506	-0.000163771	-0.241695
2.0068	0.0451076	0.0132225	0.000322761	6.14833	2.875	2.1875	0.12628	0.0229562	-0.271611	-0.186325	6.39055	-0.000177239	-0.242222
2.00796	0.0449611	0.0132026	0.000310181	6.14371	2.875	2.1875	-0.12628	0.02259	-0.315691	-0.186688	6.38641	-0.000189819	-0.242694
2.00912	0.0449611	0.0131902	0.000304524	6.13998	2.875	2.1875	0	0.0222974	-0.252179	-0.186987	6.38307	-0.000195476	-0.243083
2.01028	0.0449611	0.0131891	0.000309714	6.1373	2.875	2.1875	0	0.0220159	-0.242667	-0.187254	6.38073	-0.000190286	-0.243431
2.01144	0.0470119	0.0132007	0.000327868	6.13552	2.875	2.1875	1.76791	0.0217453	-0.233274	-0.187494	6.37927	-0.000172132	-0.243742
2.0126	0.0449611	0.013197	0.000330903	6.13245	2.875	2.1875	-1.76791	0.0206106	-0.978238	-0.187711	6.37648	-0.000169097	-0.244025
2.01376	0.0452541	0.0131849	0.000325165	6.12888	2.875	2.1875	0.252559	0.020361	-0.215203	-0.187537	6.37268	-0.000174835	-0.243798
2.01492	0.0451076	0.0131729	0.000319712	6.12522	2.875	2.1875	-0.12628	0.0199964	-0.314266	-0.187349	6.36877	-0.000180288	-0.243554
2.01608	0.0451076	0.0131666	0.000319676	6.12217	2.875	2.1875	0	0.0197042	-0.251861	-0.187099	6.3654	-0.000180324	-0.243228
2.01724	0.0451076	0.0131707	0.00032989	6.11996	2.875	2.1875	0	0.0194218	-0.243454	-0.186816	6.36282	-0.00017011	-0.242861
2.0184	0.0452541	0.0131878	0.000353078	6.1188	2.875	2.1875	0.12628	0.019149	-0.235169	-0.186505	6.36126	-0.000146922	-0.242457
2.01956	0.0451076	0.0131908	0.000361463	6.11681	2.875	2.1875	-0.12628	0.0188232	-0.280873	-0.186171	6.35883	-0.000138537	-0.242022
2.02072	0.0452541	0.013179	0.000358068	6.11244	2.875	2.1875	0.12628	0.0185692	-0.218968	-0.185789	6.35396	-0.000141932	-0.241526
2.02188	0.0451076	0.0131661	0.000353162	6.10812	2.875	2.1875	-0.12628	0.0182619	-0.264921	-0.185391	6.34913	-0.000146838	-0.241008
2.02304	0.0454006	0.0131575	0.000351878	6.10441	2.875	2.1875	0.252559	0.0180261	-0.203256	-0.184953	6.34485	-0.000148122	-0.240439
2.0242	0.0452541	0.0131586	0.000359652	6.10174	2.875	2.1875	-0.12628	0.0176743	-0.303313	-0.184507	6.3416	-0.000140348	-0.239859
2.02536	0.0451076	0.0131724	0.000379508	6.10033	2.875	2.1875	-0.12628	0.0173937	-0.241899	-0.184002	6.33954	-0.000120492	-0.239202
2.02652	0.0451076	0.0131726	0.000385479	6.09801	2.875	2.1875	0	0.0171842	-0.180604	-0.183468	6.33651	-0.000114521	-0.238508
2.02768	0.0451076	0.0131582	0.000376361	6.09466	2.875	2.1875	0	0.0169832	-0.173272	-0.182935	6.33247	-0.000123639	-0.237816
2.02884	0.0452541	0.013141	0.000363929	6.09137	2.875	2.1875	0.12628	0.0167906	-0.166028	-0.182407	6.3285	-0.000136071	-0.23713
2.03	0.0452541	0.0131275	0.000354217	6.08875	2.875	2.1875	0	0.0165438	-0.212738	-0.181888	6.3252	-0.000145783	-0.236454
2.03116	0.0474514	0.0131222	0.00035296	6.08667	2.875	2.1875	1.89419	0.0163052	-0.205681	-0.181353	6.32242	-0.00014704	-0.235759
2.03232	0.0452541	0.0131293	0.000363481	6.08582	2.875	2.1875	-1.89419	0.0151373	-1.00684	-0.180806	6.32087	-0.000136519	-0.235048
2.03348	0.0456936	0.0131377	0.000375211	6.08508	2.875	2.1875	0.378839	0.0149143	-0.192266	-0.17985	6.31889	-0.000124789	-0.233805
2.03464	0.0455471	0.0131313	0.000372753	6.08295	2.875	2.1875	-0.12628	0.0145112	-0.347526	-0.178888	6.3155	-0.000127247	-0.232555
2.0358	0.0452541	0.013121	0.000366072	6.08064	2.875	2.1875	-0.252559	0.0141777	-0.287461	-0.177843	6.31184	-0.000133928	-0.231196
2.03696	0.0454006	0.0131125	0.000360604	6.07874	2.875	2.1875	0.12628	0.0139762	-0.173664	-0.176743	6.30851	-0.000139396	-0.229766
2.03812	0.0454006	0.0131113	0.000362083	6.07755	2.875	2.1875	0	0.0137192	-0.221575	-0.175645	6.30589	-0.000137917	-0.228339
2.03928	0.0470119	0.0131219	0.000374135	6.07778	2.875	2.1875	1.38908	0.013469	-0.215722	-0.174525	6.30467	-0.000125865	-0.226882
2.04044	0.0455471	0.0131371	0.000389215	6.07901	2.875	2.1875	-1.2628	0.012538	-0.802594	-0.173383	6.30441	-0.000110785	-0.225398
2.0416	0.0455471	0.0131378	0.000389207	6.07936	2.875	2.1875	0	0.0122381	-0.258502	-0.171931	6.30287	-0.000110793	-0.22351
2.04276	0.0452541	0.0131273	0.00037985	6.07809	2.875	2.1875	-0.252559	0.0119443	-0.25328	-0.170435	6.29966	-0.00012015	-0.221566
2.04392	0.0452541	0.0131172	0.000370202	6.07711	2.875	2.1875	0	0.0117814	-0.140436	-0.168899	6.29668	-0.000129798	-0.219569
2.04508	0.0454006	0.0131132	0.000365995	6.07686	2.875	2.1875	0.12628	0.0116243	-0.135409	-0.167377	6.29445	-0.000134005	-0.21759
2.04624	0.0454006	0.01312	0.000372062	6.07773	2.875	2.1875	0	0.0114105	-0.184324	-0.16587	6.29336	-0.000127938	-0.215631
2.0474	0.0454006	0.0131402	0.000390821	6.0799	2.875	2.1875	0	0.0112023	-0.179457	-0.164354	6.29356	-0.000109179	-0.213661
2.04856	0.0454006	0.0131465	0.000395098	6.08124	2.875	2.1875	0	0.0109997	-0.174678	-0.162831	6.29292	-0.000104902	-0.211681
2.04972	0.0449611	0.0131378	0.000386101	6.08066	2.875	2.1875	-0.378839	0.0108025	-0.169984	-0.161302	6.29035	-0.000113899	-0.209693
2.05088	0.0455471	0.0131282	0.00037591	6.08014	2.875	2.1875	0.505119	0.0107982	-0.00375345	-0.159769	6.28784	-0.00012409	-0.2077
2.05204	0.0456936	0.0131228	0.000369653	6.08009	2.875	2.1875	0.12628	0.0105492	-0.214643	-0.158313	6.2859	-0.000130347	-0.205807
2.0532	0.0454006	0.0131269	0.000373068	6.08067	2.875	2.1875	-0.252559	0.0102429	-0.264018	-0.156829	6.28454	-0.000126932	-0.203878
2.05436	0.0455471	0.0131433	0.000388873	6.08223	2.875	2.1875	0.12628	0.0100667	-0.151898	-0.155292	6.28411	-0.000111127	-0.20188
2.05552	0.0455471	0.0131601	0.000404693	6.08395	2.875	2.1875	0	0.00983301	-0.201478	-0.153757	6.28383	-9.53071e-05	-0.199884
2.05668	0.0455471	0.0131622	0.000405433	6.08465	2.875	2.1875	0	0.00960416	-0.197284	-0.152198	6.2825	-9.45675e-05	-0.197857
2.05784	0.0455471	0.0131618	0.000403174	6.08542	2.875	2.1875	0	0.00938007	-0.193185	-0.150617	6.28122	-9.68256e-05	-0.195802
2.059	0.0455471	0.0131646	0.000403354	6.08669	2.875	2.1875	0	0.00916062	-0.189184	-0.149014	6.2804	-9.66456e-05	-0.193719
2.06016	0.0459865	0.0131761	0.00041141	6.08903	2.875	2.1875	0.378839	0.0089457	-0.185276	-0.147392	6.28064	-8.85905e-05	-0.19161
2.06132	0.0455471	0.0131998	0.000430969	6.0926	2.875	2.1875	-0.378839	0.00854772	-0.343083	-0.145751	6.28207	-6.90314e-05	-0.189477
2.06248	0.0455471	0.0132239	0.000450261	6.09645	2.875	2.1875	0	0.00834146	-0.177812	-0.144013	6.28367	-4.9739e-05	-0.187216
2.06364	0.0455471	0.0132335	0.000454798	6.09931	2.875	2.1875	0	0.00813932	-0.174254	-0.142257	6.28424	-4.52024e-05	-0.184935
2.0648	0.0448147	0.0132339	0.000450924	6.10108	2.875	2.1875	-0.631398	0.00794122	-0.170782	-0.140486	6.28371	-4.9076e-05	-0.182632
2.06596	0.0451076	0.0132358	0.0004477	6.10336	2.875	2.1875	0.252559	0.00805951	0.101978	-0.1387	6.28367	-5.23003e-05	-0.18031
2.06712	0.0456936	0.0132436	0.000450862	6.10587	2.875	2.1875	0.505119	0.0080568	-0.00233276	-0.137033	6.28402	-4.91376e-05	-0.178143
2.06828	0.0455471	0.0132626	0.000464642	6.10954	2.875	2.1875	-0.12628	0.00780811	-0.214392	-0.135433	6.2856	-3.53578e-05	-0.176062
2.06944	0.0456936	0.0132814	0.000478172	6.1132	2.875	2.1875	0.12628	0.00762577	-0.157187	-0.133793	6.28713	-2.18279e-05	-0.173931
2.0706	0.0456936	0.0132868	0.000479074	6.11545	2.875	2.1875	0	0.00738472	-0.207808	-0.132142	6.28724	-2.09255e-05	-0.171785
2.07176	0.0454006	0.0132823	0.000470068	6.11695	2.875	2.1875	-0.252559	0.00714731	-0.204657	-0.130454	6.28654	-2.99318e-05	-0.16959
2.07292	0.0454006	0.0132779	0.000460513	6.11872	2.875	2.1875	0	0.00703844	-0.0938595	-0.128729	6.28607	-3.94873e-05	-0.167347
2.07408	0.0455471	0.0132781	0.000455538	6.12089	2.875	2.1875	0.12628	0.00693304	-0.0908569	-0.127021	6.28601	-4.4462e-05	-0.165127
2.07524	0.0448147	0.0132881	0.000460277	6.12384	2.875	2.1875	-0.631398	0.00676858	-0.141773	-0.125331	6.28677	-3.97233e-05	-0.16293
2.0764	0.0455471	0.0132988	0.000465971	6.12675	2.875	2.1875	0.631398	0.00691995	0.130486	-0.123632	6.28748	-3.40286e-05	-0.160722
2.07756	0.0456936	0.01331	0.000471719	6.12985	2.875	2.1875	0.12628	0.00676227	-0.135934	-0.12206	6.28853	-2.8281e-05	-0.158678
2.07872	0.0455471	0.0133097	0.000466346	6.13195	2.875	2.1875	-0.12628	0.00654544	-0.186922	-0.120481	6.28858	-3.36539e-05	-0.156625
2.07988	0.0451076	0.0133078	0.000458912	6.13408	2.875	2.1875	-0.378839	0.00639434	-0.130256	-0.118869	6.28861	-4.10883e-05	-0.154529
2.08104	0.0455471	0.01331	0.000455151	6.13667	2.875	2.1875	0.378839	0.00643389	0.0340957	-0.117251	6.2891	-4.48488e-05	-0.152426
2.0822	0.0455471	0.0133213	0.000459896	6.14027	2.875	2.1875	0	0.00628914	-0.124784	-0.115708	6.29069	-4.01043e-05	-0.15042
2.08336	0.0454006	0.0133451	0.000468919	6.14824	2.875	2.1875	-0.12628	0.00614751	-0.122099	-0.11416	6.29665	-3.10812e-05	-0.148409
2.08452	0.0430568	0.0133688	0.000477996	6.15611	2.875	2.1875	-2.02047	0.00607141	-0.0656034	-0.112609	6.30251	-2.2004e-05	-0.146392
2.08568	0.0455471	0.0133802	0.000475654	6.16269	2.875	2.1875	2.14675	0.00699822	0.798977	-0.111081	6.30709	-2.43461e-05	-0.144405
2.08684	0.0455471	0.0133836	0.000464912	6.1688	2.875	2.1875	0	0.00686609	-0.113901	-0.110003	6.3118	-3.50883e-05	-0.143004
2.088	0.0456936	0.0133893	0.000456034	6.17525	2.875	2.1875	0.12628	0.00673737	-0.110972	-0.108924	6.31685	-4.39659e-05	-0.141601
2.08916	0.0456936	0.0134024	0.000454454	6.18233	2.875	2.1875	0	0.00654948	-0.161972	-0.107843	6.32253	-4.55463e-05	-0.140196
2.09032	0.0455471	0.0134269	0.000464398	6.19024	2.875	2.1875	-0.12628	0.00636483	-0.159178	-0.106736	6.32899	-3.56016e-05	-0.138756
2.09148	0.0455471	0.0134512	0.000474093	6.19818	2.875	2.1875	3.40963e-13	0.00624583	-0.102588	-0.105602	6.33546	-2.5907e-05	-0.137283
2.09264	0.0465725	0.013464	0.000472064	6.20527	2.875	2.1875	0.883957	0.00612992	-0.0999233	-0.10447	6.34108	-2.79357e-05	-0.135812
2.0938	0.04584	0.0134678	0.00046103	6.21172	2.875	2.1875	-0.631398	0.00557958	-0.474428	-0.103341	6.34606	-3.89704e-05	-0.134343
2.09496	0.0456936	0.0134725	0.000450347	6.21841	2.875	2.1875	-0.12628	0.00534448	-0.202677	-0.102028	6.35105	-4.96527e-05	-0.132636
2.09612	0.0454006	0.0134831	0.000445147	6.22577	2.875	2.1875	-0.252559	0.00517451	-0.146522	-0.100665	6.35663	-5.48529e-05	-0.130864
2.09728	0.0455471	0.0135039	0.000449655	6.23411	2.875	2.1875	0.12628	0.0051321	-0.0365664	-0.0992787	6.36318	-5.0345e-05	-0.129062
2.09844	0.0456936	0.013524	0.000453604	6.24235	2.875	2.1875	0.12628	0.00502972	-0.0882509	-0.097924	6.36965	-4.63964e-05	-0.127301
2.0996	0.0451076	0.0135444	0.000457297	6.25081	2.875	2.1875	-0.505119	0.00486735	-0.139979	-0.096574	6.37635	-4.27033e-05	-0.125546
2.10076	0.0445217	0.013555	0.000451675	6.25833	2.875	2.1875	-0.505119	0.00495736	0.0775948	-0.0952026	6.38209	-4.83255e-05	-0.123763
2.10192	0.0454006	0.013564	0.000444588	6.26568	2.875	2.1875	0.757678	0.0052998	0.295207	-0.0939167	6.38777	-5.54122e-05	-0.122092
2.10308	0.0455471	0.0135775	0.000441772	6.27347	2.875	2.1875	0.12628	0.0052699	-0.0257776	-0.0928233	6.39414	-5.82281e-05	-0.12067
2.10424	0.04584	0.0136001	0.000447454	6.28217	2.875	2.1875	0.252559	0.00518011	-0.0774043	-0.0917632	6.40147	-5.25455e-05	-0.119292
2.1054	0.0455471	0.0136216	0.000451972	6.2909	2.875	2.1875	-0.252559	0.00496789	-0.182942	-0.0907101	6.40882	-4.80276e-05	-0.117923
2.10656	0.0456936	0.0136432	0.000456234	6.29972	2.875	2.1875	0.12628	0.00488313	-0.073075	-0.0896114	6.41621	-4.3766e-05	-0.116495
2.10772	0.0455471	0.0136557	0.000450878	6.30805	2.875	2.1875	-0.12628	0.00473828	-0.124866	-0.0885209	6.42312	-4.91222e-05	-0.115077
2.10888	0.0455471	0.0136606	0.000438016	6.31576	2.875	2.1875	0	0.00465828	-0.0689698	-0.0874124	6.42939	-6.19844e-05	-0.113636
2.11004	0.0456936	0.0136685	0.000427911	6.32381	2.875	2.1875	0.12628	0.00458058	-0.0669828	-0.086313	6.43601	-7.20893e-05	-0.112207
2.1112	0.0455471	0.013684	0.000425391	6.33244	2.875	2.1875	-0.12628	0.00444265	-0.118903	-0.0852232	6.44323	-7.46088e-05	-0.11079
2.11236	0.0455471	0.0136982	0.000421092	6.34121	2.875	2.1875	0	0.00436942	-0.0631328	-0.0841167	6.45056	-7.89081e-05	-0.109352
2.11352	0.0456936	0.0137122	0.000416219	6.35008	2.875	2.1875	0.12628	0.00429834	-0.061269	-0.0830206	6.458	-8.37809e-05	-0.107927
2.11468	0.0455471	0.0137311	0.000416207	6.35932	2.875	2.1875	-0.12628	0.00416691	-0.113309	-0.0819353	6.46584	-8.37926e-05	-0.106516
2.11584	0.0456936	0.0137421	0.00040837	6.36795	2.875	2.1875	0.12628	0.00410002	-0.0576578	-0.0808345	6.47303	-9.16297e-05	-0.105085
2.117	0.0455471	0.0137552	0.00040237	6.37687	2.875	2.1875	-0.12628	0.00397268	-0.109782	-0.0797451	6.48054	-9.76302e-05	-0.103669
2.11816	0.046426	0.0137747	0.000402734	6.38631	2.875	2.1875	0.757678	0.00390979	-0.0542138	-0.0786408	6.48854	-9.72663e-05	-0.102233
2.11932	0.0448147	0.0137928	0.000402213	6.39539	2.875	2.1875	-1.38908	0.00347387	-0.375791	-0.0775487	6.4962	-9.7787e-05	-0.100813
2.12048	0.0455471	0.01381	0.000400807	6.40442	2.875	2.1875	0.631398	0.00372711	0.218309	-0.0763089	6.50362	-9.91928e-05	-0.0992016
2.12164	0.0456936	0.0138313	0.000403651	6.41366	2.875	2.1875	0.12628	0.00366972	-0.0494733	-0.0752149	6.51144	-9.63492e-05	-0.0977794
2.1228	0.0455471	0.0138444	0.000398361	6.42228	2.875	2.1875	-0.12628	0.00355165	-0.101782	-0.0741337	6.51866	-0.000101639	-0.0963738
2.12396	0.0454006	0.0138573	0.000392486	6.43104	2.875	2.1875	-0.12628	0.00349784	-0.0463922	-0.0730388	6.52599	-0.000107514	-0.0949505
2.12512	0.04584	0.0138758	0.00039146	6.44052	2.875	2.1875	0.378839	0.00350825	0.00897414	-0.0719571	6.53406	-0.00010854	-0.0935442
2.12628	0.0455471	0.0139037	0.000399512	6.45089	2.875	2.1875	-0.252559	0.00333291	-0.151152	-0.0709154	6.54308	-0.000100488	-0.0921901
2.12744	0.0455471	0.0139305	0.000406074	6.46135	2.875	2.1875	0	0.00328421	-0.0419819	-0.0698341	6.55213	-9.39262e-05	-0.0907843
2.1286	0.0455471	0.0139577	0.000413565	6.47163	2.875	2.1875	0	0.00323714	-0.0405802	-0.0687665	6.56102	-8.64354e-05	-0.0893964
2.12976	0.0473049	0.013977	0.000412625	6.48145	2.875	2.1875	1.51536	0.00319167	-0.0391991	-0.0677129	6.56947	-8.73753e-05	-0.0880267
2.13092	0.0456936	0.0139906	0.000405368	6.49113	2.875	2.1875	-1.38908	0.00239785	-0.684329	-0.0666733	6.5778	-9.4632e-05	-0.0866753
2.13208	0.0456936	0.014008	0.000401759	6.50116	2.875	2.1875	0	0.00229265	-0.0906897	-0.0653281	6.58609	-9.82413e-05	-0.0849266
2.13324	0.0468654	0.0140332	0.000406024	6.51174	2.875	2.1875	1.01024	0.00218858	-0.0897103	-0.0639704	6.5949	-9.39762e-05	-0.0831615
2.1344	0.0448147	0.0140558	0.000408198	6.52193	2.875	2.1875	-1.76791	0.00158565	-0.519772	-0.0625999	6.60331	-9.18024e-05	-0.0813799
2.13556	0.046133	0.0140776	0.000409791	6.532	2.875	2.1875	1.13652	0.00185842	0.235145	-0.0610032	6.61131	-9.02085e-05	-0.0793041
2.13672	0.0456936	0.0141048	0.000417753	6.54207	2.875	2.1875	-0.378839	0.00156966	-0.248931	-0.059553	6.61949	-8.22466e-05	-0.0774189
2.13788	0.0455471	0.0141253	0.000419099	6.55156	2.875	2.1875	-0.12628	0.00146916	-0.0866379	-0.0580091	6.62697	-8.09009e-05	-0.0754118
2.13904	0.0455471	0.0141481	0.000422589	6.56131	2.875	2.1875	0	0.00143188	-0.0321371	-0.056451	6.6347	-7.74113e-05	-0.0733863
2.1402	0.0455471	0.0141778	0.000432453	6.57182	2.875	2.1875	0	0.00139531	-0.0315259	-0.054905	6.64319	-6.75473e-05	-0.0713765
2.14136	0.0456936	0.0142044	0.000439332	6.58204	2.875	2.1875	0.12628	0.00135943	-0.030931	-0.0533705	6.65142	-6.06676e-05	-0.0693817
2.14252	0.0455471	0.0142307	0.000445345	6.59245	2.875	2.1875	-0.12628	0.00126172	-0.084225	-0.0518472	6.65986	-5.46546e-05	-0.0674013
2.14368	0.04584	0.0142627	0.000456838	6.60341	2.875	2.1875	0.252559	0.00122714	-0.0298129	-0.0503078	6.66881	-4.3162e-05	-0.0654002
2.14484	0.0429104	0.0142877	0.00046113	6.61392	2.875	2.1875	-2.52559	0.00106818	-0.137038	-0.0487786	6.67734	-3.88705e-05	-0.0634122
2.146	0.0455471	0.0143082	0.000463055	6.62319	2.875	2.1875	2.27303	0.00215963	0.940904	-0.0472057	6.68455	-3.6945e-05	-0.0613674
2.14716	0.0455471	0.0143342	0.000470167	6.63299	2.875	2.1875	0	0.00212725	-0.0279112	-0.0461218	6.69294	-2.98334e-05	-0.0599583
2.14832	0.0455471	0.0143565	0.000473406	6.64261	2.875	2.1875	0	0.00209592	-0.0270052	-0.0450469	6.70117	-2.65936e-05	-0.0585609
2.14948	0.0455471	0.0143771	0.00047489	6.65209	2.875	2.1875	0	0.00206564	-0.0261103	-0.0439809	6.70927	-2.51097e-05	-0.0571752
2.15064	0.0455471	0.0144028	0.000481264	6.6621	2.875	2.1875	0	0.00203637	-0.0252284	-0.0429238	6.7179	-1.87358e-05	-0.0558009
2.1518	0.0455471	0.014422	0.000480751	6.67171	2.875	2.1875	0	0.00200811	-0.0243603	-0.0418754	6.72615	-1.92488e-05	-0.054438
2.15296	0.0443752	0.0144361	0.000475163	6.68092	2.875	2.1875	-1.01024	0.00198085	-0.0235034	-0.0408357	6.73401	-2.48367e-05	-0.0530864
2.15412	0.04584	0.0144545	0.000473862	6.69049	2.875	2.1875	1.2628	0.00245452	0.408335	-0.0398046	6.74223	-2.61385e-05	-0.0517459
2.15528	0.0455471	0.0144693	0.000468992	6.69978	2.875	2.1875	-0.252559	0.00230446	-0.129359	-0.0389952	6.75047	-3.10083e-05	-0.0506938
2.15644	0.0455471	0.0144818	0.00046176	6.70891	2.875	2.1875	0	0.00228053	-0.0206284	-0.0381412	6.75849	-3.82403e-05	-0.0495835
2.1576	0.0456936	0.0144984	0.000458807	6.71824	2.875	2.1875	0.12628	0.00225773	-0.0196552	-0.0372958	6.76673	-4.11929e-05	-0.0484845
2.15876	0.0455471	0.0145226	0.000463153	6.72833	2.875	2.1875	-0.12628	0.00217356	-0.0725664	-0.0364591	6.77573	-3.68469e-05	-0.0473968
2.15992	0.0455471	0.0145412	0.000461811	6.738	2.875	2.1875	0	0.00215295	-0.0177647	-0.0356046	6.78429	-3.81887e-05	-0.0462859
2.16108	0.0455471	0.0145632	0.000463239	6.74822	2.875	2.1875	0	0.00213341	-0.0168466	-0.0347588	6.79341	-3.67612e-05	-0.0451865
2.16224	0.0456936	0.0145923	0.000466228	6.76128	2.875	2.1875	0.12628	0.00211492	-0.0159353	-0.033922	6.80538	-3.3772e-05	-0.0440986
2.1634	0.0455471	0.0146189	0.000465947	6.77442	2.875	2.1875	-0.12628	0.00203499	-0.0689086	-0.0330941	6.81744	-3.40526e-05	-0.0430223
2.16456	0.0454006	0.0146468	0.000467532	6.78747	2.875	2.1875	-0.12628	0.00201856	-0.0141655	-0.0322484	6.82939	-3.24681e-05	-0.0419229
2.16572	0.0456936	0.0146813	0.000476117	6.80083	2.875	2.1875	0.252559	0.00206562	0.0405698	-0.0314117	6.84167	-2.38829e-05	-0.0408352
2.16688	0.0456936	0.0147096	0.000478719	6.81364	2.875	2.1875	0	0.00198871	-0.0662974	-0.0306106	6.85344	-2.12809e-05	-0.0397938
2.16804	0.0430568	0.0147338	0.000478964	6.82546	2.875	2.1875	-2.27303	0.00191279	-0.0654491	-0.0297918	6.86419	-2.10363e-05	-0.0387294
2.1692	0.04584	0.0147635	0.000485006	6.83751	2.875	2.1875	2.39931	0.00296271	0.905105	-0.0289554	6.87515	-1.49935e-05	-0.0376421
2.17036	0.0456936	0.0147894	0.000487185	6.84934	2.875	2.1875	-0.12628	0.00282671	-0.117244	-0.0285813	6.8865	-1.28153e-05	-0.0371557
2.17152	0.0455471	0.0148135	0.000487614	6.86098	2.875	2.1875	-0.12628	0.0027546	-0.0621629	-0.0281633	6.89759	-1.23861e-05	-0.0366122
2.17268	0.0455471	0.0148436	0.00049445	6.87292	2.875	2.1875	0	0.00274635	-0.00711293	-0.0277284	6.90897	-5.55027e-06	-0.0360469
2.17384	0.0471584	0.0148685	0.00049652	6.88429	2.875	2.1875	1.38908	0.00273946	-0.00594224	-0.0273038	6.91979	-3.4805e-06	-0.0354949
2.175	0.0456936	0.0148892	0.000494126	6.89543	2.875	2.1875	-1.2628	0.00204648	-0.597391	-0.0268897	6.93038	-5.87369e-06	-0.0349566
2.17616	0.0455471	0.0149147	0.000496029	6.90716	2.875	2.1875	-0.12628	0.00197946	-0.057775	-0.0261933	6.94121	-3.97141e-06	-0.0340512
2.17732	0.0455471	0.0149351	0.000492864	6.91846	2.875	2.1875	0	0.00197592	-0.00305517	-0.0254812	6.95159	-7.13645e-06	-0.0331256
2.17848	0.0455471	0.0149528	0.000487348	6.92941	2.875	2.1875	0	0.00197335	-0.00221293	-0.0247803	6.96162	-1.26519e-05	-0.0322144
2.17964	0.0455471	0.0149759	0.000487031	6.9409	2.875	2.1875	0	0.00197176	-0.00137069	-0.0240905	6.97221	-1.2969e-05	-0.0313177
2.1808	0.0455471	0.0150078	0.000495235	6.95319	2.875	2.1875	0	0.00197115	-0.00052931	-0.023412	6.98362	-4.76545e-06	-0.0304356
2.18196	0.0456936	0.015035	0.000498672	6.9651	2.875	2.1875	0.12628	0.00197151	0.000311207	-0.0227448	6.99467	-1.32752e-06	-0.0295682
2.18312	0.0446682	0.015065	0.000504898	6.97723	2.875	2.1875	-0.883957	0.00191035	-0.0527216	-0.022089	7.00595	4.89784e-06	-0.0287157
2.18428	0.0455471	0.0150884	0.000505154	6.98861	2.875	2.1875	0.757678	0.0022876	0.325213	-0.021418	7.01645	5.15411e-06	-0.0278434
2.18544	0.0454006	0.0151085	0.00050216	6.99973	2.875	2.1875	-0.12628	0.00229101	0.00294397	-0.0209186	7.02693	2.15992e-06	-0.0271942
2.1866	0.0430568	0.015133	0.000503767	7.01109	2.875	2.1875	-2.02047	0.00235806	0.0577948	-0.020431	7.03765	3.76722e-06	-0.0265603
2.18776	0.0459865	0.0151655	0.000513601	7.02297	2.875	2.1875	2.52559	0.00342617	0.920791	-0.0199821	7.04895	1.36015e-05	-0.0259768
2.18892	0.0456936	0.0151936	0.000519283	7.0344	2.875	2.1875	-0.252559	0.0032461	-0.155234	-0.0199988	7.0604	1.92833e-05	-0.0259984
2.19008	0.0455471	0.0152185	0.000521722	7.04561	2.875	2.1875	-0.12628	0.00319263	-0.0461009	-0.0199486	7.07155	2.17216e-05	-0.0259331
2.19124	0.0455471	0.0152375	0.000517595	7.05664	2.875	2.1875	0	0.00320322	0.00913621	-0.0198854	7.0825	1.75951e-05	-0.025851
2.1924	0.0455471	0.0152524	0.000509318	7.06739	2.875	2.1875	0	0.0032154	0.0105017	-0.0198366	7.09318	9.31804e-06	-0.0257875
2.19356	0.0455471	0.0152709	0.000504136	7.07858	2.875	2.1875	0	0.00322918	0.0118741	-0.0198028	7.10433	4.13579e-06	-0.0257436
2.19472	0.0456936	0.0152971	0.000506577	7.09043	2.875	2.1875	0.12628	0.00324455	0.0132509	-0.0197846	7.11615	6.57655e-06	-0.02572
2.19588	0.0455471	0.0153208	0.000506674	7.102	2.875	2.1875	-0.12628	0.00319903	-0.0392379	-0.0197829	7.12772	6.67372e-06	-0.0257177
2.19704	0.046426	0.015341	0.000503219	7.11336	2.875	2.1875	0.757678	0.00321759	0.016	-0.0197714	7.13907	3.21912e-06	-0.0257029
2.1982	0.0477443	0.015357	0.000494701	7.1247	2.875	2.1875	1.13652	0.00286278	-0.305872	-0.0197777	7.15041	-5.29923e-06	-0.0257111
2.19936	0.046426	0.015368	0.000480812	7.13583	2.875	2.1875	-1.13652	0.00194694	-0.78952	-0.0196424	7.16137	-1.91876e-05	-0.0255352
2.20052	0.0456936	0.0153808	0.000468796	7.14706	2.875	2.1875	-0.631398	0.00159451	-0.303821	-0.0191262	7.17192	-3.12036e-05	-0.024864
2.20168	0.0455471	0.0154002	0.00046348	7.15875	2.875	2.1875	-0.12628	0.00155533	-0.033769	-0.018469	7.18276	-3.65201e-05	-0.0240097
2.20284	0.0456936	0.0154291	0.000467881	7.17115	2.875	2.1875	0.12628	0.00157943	0.020769	-0.0178042	7.1943	-3.21194e-05	-0.0231455
2.204	0.0452541	0.0154532	0.00046871	7.18264	2.875	2.1875	-0.378839	0.00154181	-0.0324319	-0.0171586	7.20495	-3.12897e-05	-0.0223061
2.20516	0.0456936	0.0154797	0.000472313	7.19416	2.875	2.1875	0.378839	0.00169243	0.129849	-0.0165053	7.21561	-2.76873e-05	-0.0214569
2.20632	0.0455471	0.0154999	0.000469628	7.20514	2.875	2.1875	-0.12628	0.00165641	-0.0310509	-0.0159245	7.22585	-3.03722e-05	-0.0207019
2.20748	0.0455471	0.0155167	0.000463373	7.21597	2.875	2.1875	0	0.00168371	0.0235293	-0.0153362	7.23591	-3.66273e-05	-0.0199371
2.20864	0.0454006	0.015539	0.000462606	7.22721	2.875	2.1875	-0.12628	0.00171183	0.0242474	-0.0147672	7.2464	-3.73938e-05	-0.0191974
2.2098	0.04584	0.0155703	0.000470952	7.23914	2.875	2.1875	0.378839	0.0018033	0.0788526	-0.0142175	7.25762	-2.90476e-05	-0.0184827
2.21096	0.0455471	0.0155977	0.000475729	7.25064	2.875	2.1875	-0.252559	0.00170818	-0.0820017	-0.0137138	7.26846	-2.42709e-05	-0.0178279
2.21212	0.0455471	0.0156222	0.000477543	7.26189	2.875	2.1875	0	0.00173889	0.0264759	-0.0131763	7.27902	-2.24571e-05	-0.0171292
2.21328	0.0456936	0.0156395	0.000472166	7.27258	2.875	2.1875	0.12628	0.00177047	0.0272181	-0.0126584	7.28904	-2.78342e-05	-0.016456
2.21444	0.0455471	0.015652	0.000462012	7.2829	2.875	2.1875	-0.12628	0.00174042	-0.0259009	-0.0121603	7.29871	-3.79883e-05	-0.0158084
2.2156	0.0456936	0.0156682	0.000455835	7.29339	2.875	2.1875	0.12628	0.00177373	0.0287155	-0.0116554	7.30855	-4.4165e-05	-0.015152
2.21676	0.0454006	0.0156923	0.000457862	7.3044	2.875	2.1875	-0.252559	0.00174542	-0.0244017	-0.0111705	7.31892	-4.21384e-05	-0.0145216
2.21792	0.0448147	0.0157271	0.000462958	7.31937	2.875	2.1875	-0.505119	0.00184297	0.0840914	-0.010679	7.33326	-3.70425e-05	-0.0138827
2.21908	0.0459865	0.0157581	0.000465084	7.3337	2.875	2.1875	1.01024	0.00219141	0.300375	-0.0102344	7.347	-3.49159e-05	-0.0133047
2.22024	0.0455471	0.0157801	0.000459108	7.34698	2.875	2.1875	-0.378839	0.00204097	-0.129684	-0.00994353	7.3599	-4.08924e-05	-0.0129266
2.2214	0.0456936	0.0157966	0.000447743	7.35972	2.875	2.1875	0.12628	0.00207903	0.0328086	-0.0095934	7.37219	-5.22566e-05	-0.0124714
2.22256	0.0454006	0.0158159	0.000439141	7.37274	2.875	2.1875	-0.252559	0.00205562	-0.0201784	-0.00926426	7.38478	-6.08586e-05	-0.0120435
2.22372	0.0455471	0.0158426	0.00043813	7.38626	2.875	2.1875	0.12628	0.00215822	0.0884474	-0.00892971	7.39786	-6.18698e-05	-0.0116086
2.22488	0.0456936	0.0158797	0.000448334	7.40027	2.875	2.1875	0.12628	0.00219939	0.035494	-0.00864336	7.41151	-5.16659e-05	-0.0112364
2.22604	0.0455471	0.0159134	0.000455562	7.41383	2.875	2.1875	-0.12628	0.00217916	-0.0174422	-0.00837885	7.42472	-4.44385e-05	-0.0108925
2.2272	0.0456936	0.0159374	0.000454077	7.42619	2.875	2.1875	0.12628	0.0022225	0.0373621	-0.00810985	7.43673	-4.59231e-05	-0.0105428
2.22836	0.0455471	0.0159549	0.000445994	7.4381	2.875	2.1875	-0.12628	0.00220445	-0.0155647	-0.00786336	7.44832	-5.40061e-05	-0.0102224
2.22952	0.0470119	0.0159732	0.000439464	7.44979	2.875	2.1875	1.2628	0.00224998	0.0392509	-0.00761306	7.45968	-6.0536e-05	-0.00989697
2.23068	0.0454006	0.0159981	0.000439619	7.46194	2.875	2.1875	-1.38908	0.00167168	-0.498534	-0.00738594	7.47154	-6.0381e-05	-0.00960173
2.23184	0.0456936	0.0160332	0.000450084	7.47485	2.875	2.1875	0.252559	0.00178164	0.0947983	-0.00691577	7.48385	-4.99163e-05	-0.0089905
2.233	0.0456936	0.016065	0.000457271	7.48747	2.875	2.1875	0	0.0017675	-0.0121905	-0.00649593	7.49592	-4.27295e-05	-0.00844471
2.23416	0.0455471	0.0160825	0.000450611	7.49881	2.875	2.1875	-0.12628	0.00175424	-0.0114371	-0.00607327	7.50671	-4.93887e-05	-0.00789526
2.23532	0.0455471	0.0160921	0.000436446	7.50939	2.875	2.1875	0	0.00180433	0.0431862	-0.00564796	7.51673	-6.35541e-05	-0.00734235
2.23648	0.0455471	0.0161009	0.000422017	7.51962	2.875	2.1875	0	0.00185532	0.043956	-0.00524682	7.52644	-7.79835e-05	-0.00682087
2.23764	0.0456936	0.0161138	0.000413055	7.52967	2.875	2.1875	0.12628	0.00190723	0.0447474	-0.00487003	7.536	-8.69448e-05	-0.00633104
2.2388	0.0455471	0.0161362	0.000413786	7.54032	2.875	2.1875	-0.12628	0.00189758	-0.00831379	-0.00451779	7.54619	-8.62139e-05	-0.00587313
2.23996	0.0456936	0.0161703	0.000420585	7.55425	2.875	2.1875	0.12628	0.00195137	0.0463707	-0.00416367	7.55967	-7.94149e-05	-0.00541277
2.24112	0.0456936	0.0162011	0.000424696	7.56768	2.875	2.1875	0	0.00194364	-0.00667069	-0.00383456	7.57266	-7.53041e-05	-0.00498493
2.24228	0.0455471	0.0162232	0.000420382	7.5803	2.875	2.1875	-0.12628	0.00193686	-0.00584224	-0.00350405	7.58485	-7.96185e-05	-0.00455527
2.24344	0.0455471	0.0162396	0.000412473	7.59161	2.875	2.1875	0	0.00199353	0.0488586	-0.00317238	7.59573	-8.75274e-05	-0.0041241
2.2446	0.0456936	0.0162594	0.000408215	7.60307	2.875	2.1875	0.12628	0.0020512	0.0497086	-0.00286647	7.6068	-9.17853e-05	-0.00372641
2.24576	0.046133	0.0162877	0.000412136	7.61535	2.875	2.1875	0.378839	0.00204738	-0.00328966	-0.00258657	7.61871	-8.78636e-05	-0.00336253
2.24692	0.0456936	0.0163276	0.000427562	7.62856	2.875	2.1875	-0.378839	0.0018571	-0.16404	-0.00230632	7.63156	-7.24377e-05	-0.00299821
2.24808	0.0454006	0.0163645	0.000440303	7.64145	2.875	2.1875	-0.252559	0.00185521	-0.00162414	-0.00194603	7.64398	-5.96965e-05	-0.00252984
2.24924	0.0456936	0.0163892	0.000442211	7.65278	2.875	2.1875	0.252559	0.00197923	0.106916	-0.0015859	7.65485	-5.77893e-05	-0.00206167
2.2504	0.0455471	0.0164065	0.000436305	7.6637	2.875	2.1875	-0.12628	0.00197925	1.2069e-05	-0.00127947	7.66536	-6.36945e-05	-0.00166331
2.25156	0.0456936	0.0164258	0.000431949	7.67494	2.875	2.1875	0.12628	0.00204273	0.0547302	-0.000973673	7.6762	-6.80514e-05	-0.00126578
2.25272	0.0462795	0.0164518	0.000435179	7.68638	2.875	2.1875	0.505119	0.00204474	0.00172672	-0.000695447	7.68729	-6.48209e-05	-0.000904081
2.25388	0.0455471	0.0164883	0.000449019	7.69858	2.875	2.1875	-0.631398	0.00179778	-0.212897	-0.000418419	7.69912	-5.09811e-05	-0.000543945
2.25504	0.0452541	0.0165225	0.000460789	7.71053	2.875	2.1875	-0.252559	0.00186418	0.0572414	-3.6238e-05	7.71058	-3.92112e-05	-4.71094e-05
2.2562	0.0484768	0.0165413	0.000457506	7.72108	2.875	2.1875	2.77815	0.00205649	0.165785	0.000317597	7.72066	-4.24939e-05	0.000412876
2.25736	0.0456936	0.016553	0.000447325	7.73101	2.875	2.1875	-2.39931	0.000874942	-1.01857	0.000589544	7.73025	-5.26753e-05	0.000766407
2.25852	0.0456936	0.016567	0.000439301	7.7412	2.875	2.1875	0	0.000881221	0.00541293	0.00136586	7.73943	-6.06989e-05	0.00177562
2.25968	0.0456936	0.0165882	0.000439171	7.75166	2.875	2.1875	0	0.000887936	0.00578879	0.00214018	7.74887	-6.08294e-05	0.00278223
2.26084	0.0446682	0.0166202	0.000450256	7.76279	2.875	2.1875	-0.883957	0.00089509	0.00616724	0.00291269	7.759	-4.97444e-05	0.00378649
2.262	0.0448147	0.0166504	0.000460479	7.77337	2.875	2.1875	0.12628	0.00134015	0.38367	0.00368359	7.76858	-3.95205e-05	0.00478866
2.26316	0.0456936	0.0166651	0.000455953	7.78244	2.875	2.1875	0.757678	0.00172337	0.330367	0.00426643	7.7769	-4.40474e-05	0.00554637
2.26432	0.0455471	0.0166716	0.000443922	7.79059	2.875	2.1875	-0.12628	0.00173249	0.00785603	0.0046879	7.7845	-5.60778e-05	0.00609427
2.26548	0.0456936	0.0166784	0.000432538	7.79861	2.875	2.1875	0.12628	0.00180495	0.0624698	0.0051078	7.79197	-6.74623e-05	0.00664014
2.26664	0.0455471	0.0166909	0.000427231	7.80693	2.875	2.1875	-0.12628	0.00181581	0.00936552	0.00549931	7.79978	-7.27695e-05	0.0071491
2.2678	0.0456936	0.0167133	0.000432529	7.81576	2.875	2.1875	0.12628	0.00189007	0.0640147	0.0058889	7.80811	-6.74712e-05	0.00765557
2.26896	0.04584	0.0167484	0.000450852	7.82545	2.875	2.1875	0.12628	0.00190277	0.0109457	0.00624973	7.81732	-4.91482e-05	0.00812465
2.27012	0.0455471	0.0167682	0.000454117	7.83379	2.875	2.1875	-0.252559	0.00185391	-0.0421155	0.00660824	7.82519	-4.58828e-05	0.00859071
2.27128	0.04584	0.0167789	0.00044867	7.84128	2.875	2.1875	0.252559	0.00193097	0.0664233	0.00699086	7.83219	-5.13301e-05	0.00908812
2.27244	0.0455471	0.016789	0.000442663	7.84871	2.875	2.1875	-0.252559	0.00188398	-0.0405009	0.00734407	7.83917	-5.73373e-05	0.00954729
2.2736	0.0456936	0.0168043	0.000441832	7.85655	2.875	2.1875	0.12628	0.00196292	0.0680509	0.00772095	7.84652	-5.81683e-05	0.0100372
2.27476	0.0459865	0.0168295	0.000450707	7.8653	2.875	2.1875	0.252559	0.00198034	0.0150138	0.00806798	7.85481	-4.92928e-05	0.0104884
2.27592	0.0456936	0.0168676	0.000472616	7.87493	2.875	2.1875	-0.252559	0.00187375	-0.0918888	0.00841157	7.86399	-2.73837e-05	0.010935
2.27708	0.0459865	0.0168909	0.000479781	7.88341	2.875	2.1875	0.252559	0.00189307	0.0166578	0.0088048	7.87196	-2.02193e-05	0.0114462
2.27824	0.0475979	0.0168991	0.000473714	7.88996	2.875	2.1875	1.38908	0.00178834	-0.0902819	0.00919414	7.87801	-2.62857e-05	0.0119524
2.2794	0.0456936	0.0169057	0.00046559	7.89652	2.875	2.1875	-1.64164	0.000997066	-0.682137	0.00963271	7.884	-3.44099e-05	0.0125225
2.28056	0.0456936	0.0169156	0.000460841	7.90336	2.875	2.1875	0	0.0010187	0.0186543	0.0104136	7.88982	-3.91589e-05	0.0135377
2.28172	0.0470119	0.0169338	0.000464902	7.91062	2.875	2.1875	1.13652	0.00104085	0.0190888	0.0111905	7.89607	-3.50982e-05	0.0145476
2.28288	0.0455471	0.0169639	0.000481097	7.9187	2.875	2.1875	-1.2628	0.000501058	-0.465336	0.0119634	7.90315	-1.89029e-05	0.0155524
2.28404	0.0456936	0.0169808	0.000484968	7.9254	2.875	2.1875	0.12628	0.000586459	0.0736216	0.0129725	7.90854	-1.50317e-05	0.0168643
2.2852	0.0456936	0.0169827	0.000473799	7.93096	2.875	2.1875	0	0.000609656	0.0199974	0.0139517	7.91282	-2.62012e-05	0.0181372
2.28636	0.0456936	0.01698	0.000458457	7.93592	2.875	2.1875	0	0.000633154	0.0202569	0.0149278	7.91651	-4.15427e-05	0.0194062
2.28752	0.0456936	0.0169788	0.000444977	7.94091	2.875	2.1875	0	0.000656966	0.0205276	0.0159013	7.92024	-5.5023e-05	0.0206717
2.28868	0.0454006	0.0169848	0.000438789	7.94637	2.875	2.1875	-0.252559	0.000681102	0.0208069	0.0168725	7.92444	-6.12115e-05	0.0219343
2.28984	0.0456936	0.017002	0.000443815	7.95276	2.875	2.1875	0.252559	0.000830565	0.128847	0.0178418	7.92956	-5.61846e-05	0.0231943
2.291	0.04584	0.0170251	0.000453113	7.96027	2.875	2.1875	0.12628	0.000855449	0.0214517	0.0187561	7.93588	-4.68872e-05	0.0243829
2.29216	0.0455471	0.017033	0.000447958	7.96624	2.875	2.1875	-0.252559	0.000818263	-0.0320569	0.0196691	7.94067	-5.20421e-05	0.0255698
2.29332	0.0456936	0.0170355	0.000437712	7.97173	2.875	2.1875	0.12628	0.000906471	0.0760414	0.0206077	7.94494	-6.22881e-05	0.02679
2.29448	0.0451076	0.0170386	0.000428411	7.97704	2.875	2.1875	-0.505119	0.000932633	0.0225534	0.0215189	7.94907	-7.15891e-05	0.0279745
2.29564	0.0456936	0.0170481	0.000425487	7.98292	2.875	2.1875	0.505119	0.00120923	0.238448	0.0224295	7.95376	-7.45128e-05	0.0291583
2.2968	0.0456936	0.0170683	0.000432866	7.98981	2.875	2.1875	0	0.00123645	0.0234672	0.0232332	7.95961	-6.7134e-05	0.0302032
2.29796	0.0456936	0.0171011	0.00045327	7.9975	2.875	2.1875	1.43563e-13	0.00126429	0.023994	0.0240369	7.96625	-4.67303e-05	0.0312479
2.29912	0.046133	0.0171184	0.000458919	8.00365	2.875	2.1875	0.378839	0.00129275	0.0245345	0.0248405	7.97136	-4.10809e-05	0.0322927
2.30028	0.0465725	0.0171202	0.000449515	8.0084	2.875	2.1875	0.378839	0.00113436	-0.136538	0.0256443	7.97506	-5.0485e-05	0.0333376
2.30144	0.0456936	0.0171213	0.000439249	8.01314	2.875	2.1875	-0.757678	0.000789059	-0.297677	0.0265284	7.97866	-6.07507e-05	0.0344869
2.3026	0.0455471	0.0171301	0.000437179	8.01832	2.875	2.1875	-0.12628	0.00081911	0.025906	0.0275729	7.98247	-6.28214e-05	0.0358447
2.30376	0.0456936	0.0171508	0.000447229	8.02437	2.875	2.1875	0.12628	0.000912061	0.0801302	0.0286182	7.98717	-5.27713e-05	0.0372037
2.30492	0.04584	0.0171715	0.000457624	8.03024	2.875	2.1875	0.12628	0.000942968	0.026644	0.029638	7.99171	-4.23757e-05	0.0385295
2.30608	0.0456936	0.0171764	0.000453268	8.03444	2.875	2.1875	-0.12628	0.000911849	-0.0268267	0.0306594	7.99458	-4.67322e-05	0.0398572
2.30724	0.0456936	0.0171767	0.000444729	8.0381	2.875	2.1875	0	0.000943674	0.0274353	0.0317091	7.99688	-5.5271e-05	0.0412219
2.3084	0.0456936	0.0171781	0.000437743	8.04168	2.875	2.1875	0	0.000975967	0.0278388	0.032761	7.99909	-6.22572e-05	0.0425893
2.30956	0.0456936	0.0171858	0.000437743	8.04545	2.875	2.1875	0	0.00100874	0.0282552	0.0338153	8.00149	-6.22575e-05	0.0439599
2.31072	0.0456936	0.0172043	0.000448957	8.04989	2.875	2.1875	0	0.00104202	0.0286845	0.0348724	8.00456	-5.10429e-05	0.0453341
2.31188	0.04584	0.0172236	0.000461424	8.05424	2.875	2.1875	0.12628	0.00107581	0.0291302	0.0359325	8.00753	-3.85757e-05	0.0467123
2.31304	0.0456936	0.0172281	0.000459141	8.05737	2.875	2.1875	-0.12628	0.00104764	-0.0242853	0.036996	8.00927	-4.08587e-05	0.0480948
2.3142	0.0456936	0.0172207	0.000445732	8.05928	2.875	2.1875	0	0.00108248	0.0300353	0.0380899	8.00976	-5.42685e-05	0.0495168
2.31536	0.0456936	0.017213	0.00043176	8.06124	2.875	2.1875	0	0.00111786	0.0304974	0.0391877	8.0103	-6.82395e-05	0.050944
2.31652	0.0456936	0.0172103	0.000422658	8.06369	2.875	2.1875	0	0.00115379	0.030975	0.0402898	8.01131	-7.73419e-05	0.0523767
2.31768	0.0456936	0.0172173	0.000423253	8.06685	2.875	2.1875	0	0.00119029	0.0314664	0.0413965	8.01304	-7.67472e-05	0.0538155
[truncated: 10,070 more rows]
