# Supplementary material for: Effects of friction models on simulation of pneumatic cylinder
Source: Copernicus journal article supplement (doi:10.5194/ms-10-517-2019), 2019-10-30
Supplement: Supplementary file 2 [file Figure 8.xls]

## Sheet: output
tt	x	p1c	p2c	Fr1	u1	u2	v	vc	a	ac	Frs
0	0.0299997	4.16274e-05	0.000201354	-0.0624596	2.99	2.09167	0	0.00250354	0	1.09195e-05	-0.0624738	1.41954e-05
0.00116	0.0314646	4.16274e-05	0.000201354	-0.0624596	2.99	2.09167	1.2628	0.00250354	0	1.13156e-05	-0.0624743	1.47102e-05
0.00232	0.0313181	4.16274e-05	0.000201354	-0.0624596	2.99	2.09167	-0.12628	0.00250354	0	1.1726e-05	-0.0624748	1.52438e-05
0.00348	0.0310251	4.16274e-05	0.000201354	-0.0624596	2.99	2.09167	-0.252559	0.00250354	0	1.21513e-05	-0.0624754	1.57966e-05
0.00464	0.032197	4.16274e-05	0.000201354	-0.0624596	2.99	2.09167	1.01024	0.00250354	0	1.2592e-05	-0.062476	1.63696e-05
0.0058	0.0304392	4.16274e-05	0.000201354	-0.0624596	2.99	2.09167	-1.51536	0.00250354	0	1.30487e-05	-0.0624765	1.69633e-05
0.00696	0.0317576	4.16274e-05	0.000201354	-0.0624596	2.99	2.09167	1.13652	0.00250354	0	1.3522e-05	-0.0624772	1.75785e-05
0.00812	0.0314646	4.16274e-05	0.000201354	-0.0624596	2.99	2.09167	-0.252559	0.00250354	0	1.40124e-05	-0.0624778	1.82161e-05
0.00928	0.0308787	4.16274e-05	0.000201354	-0.0624596	2.99	2.09167	-0.505119	0.00250354	0	1.45206e-05	-0.0624785	1.88768e-05
0.01044	0.0316111	4.16274e-05	0.000201354	-0.0624596	2.99	2.09167	0.631398	0.00250354	0	1.50473e-05	-0.0624791	1.95614e-05
0.0116	0.0275095	4.16274e-05	0.000201354	-0.0624596	2.99	2.09167	-3.53583	0.00250354	0	1.5593e-05	-0.0624799	2.02709e-05
0.01276	0.0313181	4.16274e-05	0.000201354	-0.0624596	2.99	2.09167	3.28327	0.00250354	0	1.61586e-05	-0.0624806	2.10061e-05
0.01392	0.0310251	4.16274e-05	0.000201354	-0.0624596	2.99	2.09167	-0.252559	0.00250354	0	1.67446e-05	-0.0624814	2.1768e-05
0.01508	0.0285349	4.16274e-05	0.000201354	-0.0624596	2.99	2.09167	-2.14675	0.00250354	0	1.73519e-05	-0.0624821	2.25575e-05
0.01624	0.0310251	4.16274e-05	0.000201354	-0.0624596	2.99	2.09167	2.14675	0.00250354	0	1.79813e-05	-0.062483	2.33757e-05
0.0174	0.0314646	4.16274e-05	0.000201354	-0.0624596	2.99	2.09167	0.378839	0.00250354	0	1.86335e-05	-0.0624838	2.42235e-05
0.01856	0.0314646	4.16274e-05	0.000201354	-0.0624596	2.99	2.09167	0	0.00250354	0	1.93093e-05	-0.0624847	2.51021e-05
0.01972	0.0333689	4.16274e-05	0.000201354	-0.0624596	2.99	2.09167	1.64164	0.00250354	0	2.00096e-05	-0.0624856	2.60125e-05
0.02088	0.0316111	4.16274e-05	0.000201354	-0.0624596	2.99	2.09167	-1.51536	0.00250354	0	2.07354e-05	-0.0624865	2.6956e-05
0.02204	0.0314646	4.16274e-05	0.000201354	-0.0624596	2.99	2.09167	-0.12628	0.00250354	0	2.14874e-05	-0.0624875	2.79337e-05
0.0232	0.0313181	4.16274e-05	0.000201354	-0.0624596	2.99	2.09167	-0.12628	0.00250354	0	2.22668e-05	-0.0624885	2.89468e-05
0.02436	0.0313181	4.16274e-05	0.000201354	-0.0624596	2.99	2.09167	0	0.00250354	0	2.30744e-05	-0.0624896	2.99967e-05
0.02552	0.0313181	4.16274e-05	0.000201354	-0.0624596	2.99	2.09167	0	0.00250354	0	2.39113e-05	-0.0624907	3.10846e-05
0.02668	0.0313181	4.16274e-05	0.000201354	-0.0624596	2.99	2.09167	0	0.00250354	0	2.47785e-05	-0.0624918	3.22121e-05
0.02784	0.0313181	4.16274e-05	0.000201354	-0.0624596	2.99	2.09167	0	0.00250354	0	2.56772e-05	-0.062493	3.33804e-05
0.029	0.0313181	4.16274e-05	0.000201354	-0.0624596	2.99	2.09167	0	0.00250354	0	2.66085e-05	-0.0624942	3.45911e-05
0.03016	0.0314646	4.16274e-05	0.000201354	-0.0624596	2.99	2.09167	0.12628	0.00250354	0	2.75736e-05	-0.0624954	3.58457e-05
0.03132	0.0314646	4.16274e-05	0.000201354	-0.0624596	2.99	2.09167	0	0.00250354	0	2.85737e-05	-0.0624967	3.71458e-05
0.03248	0.0313181	4.16274e-05	0.000201354	-0.0624596	2.99	2.09167	-0.12628	0.00250354	0	2.961e-05	-0.0624981	3.8493e-05
0.03364	0.0316111	4.16274e-05	0.000201354	-0.0624596	2.99	2.09167	0.252559	0.00250354	0	3.06839e-05	-0.0624995	3.98891e-05
0.0348	0.0310251	4.16274e-05	0.000201354	-0.0624596	2.99	2.09167	-0.505119	0.00250354	0	3.17968e-05	-0.0625009	4.13359e-05
0.03596	0.0314646	4.16274e-05	0.000201354	-0.0624596	2.99	2.09167	0.378839	0.00250354	0	3.29501e-05	-0.0625024	4.28351e-05
0.03712	0.0308787	4.16274e-05	0.000201354	-0.0624596	2.99	2.09167	-0.505119	0.00250354	0	3.41452e-05	-0.062504	4.43887e-05
0.03828	0.0314646	4.16274e-05	0.000201354	-0.0624596	2.99	2.09167	0.505119	0.00250354	0	3.53836e-05	-0.0625056	4.59987e-05
0.03944	0.0333689	4.16274e-05	0.000201354	-0.0624596	2.99	2.09167	1.64164	0.00250354	0	3.66669e-05	-0.0625073	4.7667e-05
0.0406	0.0313181	4.16274e-05	0.000201354	-0.0624596	2.99	2.09167	-1.76791	0.00250354	0	3.79968e-05	-0.062509	4.93959e-05
0.04176	0.0314646	4.16274e-05	0.000201354	-0.0624596	2.99	2.09167	0.12628	0.00250354	0	3.9375e-05	-0.0625108	5.11874e-05
0.04292	0.0316111	4.16274e-05	0.000201354	-0.0624596	2.99	2.09167	0.12628	0.00250354	0	4.08031e-05	-0.0625126	5.3044e-05
0.04408	0.0311716	4.16274e-05	0.000201354	-0.0624596	2.99	2.09167	-0.378839	0.00250354	0	4.2283e-05	-0.0625146	5.49679e-05
0.04524	0.0360056	4.16274e-05	0.000201354	-0.0624596	2.99	2.09167	4.16723	0.00250354	0	4.38165e-05	-0.0625165	5.69615e-05
0.0464	0.0313181	4.16274e-05	0.000201354	-0.0624596	2.99	2.09167	-4.04095	0.00250354	0	4.54057e-05	-0.0625186	5.90275e-05
0.04756	0.0316111	4.16274e-05	0.000201354	-0.0624596	2.99	2.09167	0.252559	0.00250354	0	4.70526e-05	-0.0625208	6.11684e-05
0.04872	0.0311716	4.16274e-05	0.000201354	-0.0624596	2.99	2.09167	-0.378839	0.00250354	0	4.87592e-05	-0.062523	6.33869e-05
0.04988	0.0311716	4.16274e-05	0.000201354	-0.0624596	2.99	2.09167	0	0.00250354	0	5.05276e-05	-0.0625253	6.56859e-05
0.05104	0.0305857	4.16274e-05	0.000201354	-0.0624596	2.99	2.09167	-0.505119	0.00250354	0	5.23602e-05	-0.0625277	6.80683e-05
0.0522	0.0316111	4.16274e-05	0.000201354	-0.0624596	2.99	2.09167	0.883957	0.00250354	0	5.42593e-05	-0.0625301	7.05371e-05
0.05336	0.0302927	4.16274e-05	0.000201354	-0.0624596	2.99	2.09167	-1.13652	0.00250354	0	5.62273e-05	-0.0625327	7.30954e-05
0.05452	0.0292673	4.16274e-05	0.000201354	-0.0624596	2.99	2.09167	-0.883957	0.00250354	0	5.82666e-05	-0.0625353	7.57466e-05
0.05568	0.0310251	4.16274e-05	0.000201354	-0.0624596	2.99	2.09167	1.51536	0.00250354	0	6.03799e-05	-0.0625381	7.84938e-05
0.05684	0.031904	4.16274e-05	0.000201354	-0.0624596	2.99	2.09167	0.757678	0.00250354	0	6.25698e-05	-0.0625409	8.13408e-05
0.058	0.031904	4.16274e-05	0.000201354	-0.0624596	2.99	2.09167	0	0.00250354	0	6.48392e-05	-0.0625439	8.4291e-05
0.05916	0.0314646	4.16274e-05	0.000201354	-0.0624596	2.99	2.09167	-0.378839	0.00250354	0	6.71909e-05	-0.0625469	8.73481e-05
0.06032	0.0310251	4.16274e-05	0.000201354	-0.0624596	2.99	2.09167	-0.378839	0.00250354	0	6.96279e-05	-0.0625501	9.05162e-05
0.06148	0.0314646	4.16274e-05	0.000201354	-0.0624596	2.99	2.09167	0.378839	0.00250354	0	7.21532e-05	-0.0625534	9.37992e-05
0.06264	0.0329294	4.16274e-05	0.000201354	-0.0624596	2.99	2.09167	1.2628	0.00250354	0	7.47702e-05	-0.0625568	9.72012e-05
0.0638	0.0304392	4.16274e-05	0.000201354	-0.0624596	2.99	2.09167	-2.14675	0.00250354	0	7.7482e-05	-0.0625603	0.000100727
0.06496	0.0298533	4.16274e-05	0.000201354	-0.0624596	2.99	2.09167	-0.505119	0.00250354	0	8.02923e-05	-0.062564	0.00010438
0.06612	0.0314646	4.16274e-05	0.000201354	-0.0624596	2.99	2.09167	1.38908	0.00250354	0	8.32044e-05	-0.0625677	0.000108166
0.06728	0.0282419	4.16274e-05	0.000201354	-0.0624596	2.99	2.09167	-2.77815	0.00250354	0	8.62222e-05	-0.0625717	0.000112089
0.06844	0.0313181	4.16274e-05	0.000201354	-0.0624596	2.99	2.09167	2.65187	0.00250354	0	8.93494e-05	-0.0625757	0.000116154
0.0696	0.0314646	4.16274e-05	0.000201354	-0.0624596	2.99	2.09167	0.12628	0.00250354	0	9.25901e-05	-0.06258	0.000120367
0.07076	0.0314646	4.16274e-05	0.000201354	-0.0624596	2.99	2.09167	0	0.00250354	0	9.59483e-05	-0.0625843	0.000124733
0.07192	0.0314646	4.16274e-05	0.000201354	-0.0624596	2.99	2.09167	0	0.00250354	0	9.94283e-05	-0.0625888	0.000129257
0.07308	0.0314646	4.16274e-05	0.000201354	-0.0624596	2.99	2.09167	0	0.00250354	0	0.000103034	-0.0625935	0.000133945
0.07424	0.0316111	4.16274e-05	0.000201354	-0.0624596	2.99	2.09167	0.12628	0.00250354	0	0.000106771	-0.0625984	0.000138803
0.0754	0.0317576	4.16274e-05	0.000201354	-0.0624596	2.99	2.09167	0.12628	0.00250354	0	0.000110644	-0.0626034	0.000143837
0.07656	0.031904	4.16274e-05	0.000201354	-0.0624596	2.99	2.09167	0.12628	0.00250354	0	0.000114657	-0.0626086	0.000149054
0.07772	0.0313181	4.16274e-05	0.000201354	-0.0624596	2.99	2.09167	-0.505119	0.00250354	0	0.000118816	-0.062614	0.00015446
0.07888	0.0314646	4.16274e-05	0.000201354	-0.0624596	2.99	2.09167	0.12628	0.00250354	0	0.000123125	-0.0626196	0.000160062
0.08004	0.0311716	4.16274e-05	0.000201354	-0.0624596	2.99	2.09167	-0.252559	0.00250354	0	0.000127591	-0.0626255	0.000165868
0.0812	0.0304392	4.16274e-05	0.000201354	-0.0624596	2.99	2.09167	-0.631398	0.00250354	0	0.000132218	-0.0626315	0.000171884
0.08236	0.0316111	4.16274e-05	0.000201354	-0.0624596	2.99	2.09167	1.01024	0.00250354	0	0.000137014	-0.0626377	0.000178118
0.08352	0.0313181	4.16274e-05	0.000201354	-0.0624596	2.99	2.09167	-0.252559	0.00250354	0	0.000141983	-0.0626442	0.000184578
0.08468	0.0292673	4.16274e-05	0.000201354	-0.0624596	2.99	2.09167	-1.76791	0.00250354	0	0.000147133	-0.0626509	0.000191273
0.08584	0.0288279	4.16274e-05	0.000201354	-0.0624596	2.99	2.09167	-0.378839	0.00250354	0	0.000152469	-0.0626578	0.00019821
0.087	0.0314646	4.16274e-05	0.000201354	-0.0624596	2.99	2.09167	2.27303	0.00250354	0	0.000157999	-0.062665	0.000205399
0.08816	0.0310251	4.16274e-05	0.000201354	-0.0624596	2.99	2.09167	-0.378839	0.00250354	0	0.00016373	-0.0626724	0.000212849
0.08932	0.0313181	4.16274e-05	0.000201354	-0.0624596	2.99	2.09167	0.252559	0.00250354	0	0.000169668	-0.0626802	0.000220569
0.09048	0.0310251	4.16274e-05	0.000201354	-0.0624596	2.99	2.09167	-0.252559	0.00250354	0	0.000175822	-0.0626882	0.000228568
0.09164	0.0323435	4.16274e-05	0.000201354	-0.0624596	2.99	2.09167	1.13652	0.00250354	0	0.000182199	-0.0626964	0.000236858
0.0928	0.0323435	4.16274e-05	0.000201354	-0.0624596	2.99	2.09167	0	0.00250354	0	0.000188807	-0.062705	0.000245449
0.09396	0.0338083	4.16274e-05	0.000201354	-0.0624596	2.99	2.09167	1.2628	0.00250354	0	0.000195655	-0.0627139	0.000254351
0.09512	0.0314646	4.16274e-05	0.000201354	-0.0624596	2.99	2.09167	-2.02047	0.00250354	0	0.000202751	-0.0627232	0.000263577
0.09628	0.0314646	4.16274e-05	0.000201354	-0.0624596	2.99	2.09167	0	0.00250354	0	0.000210105	-0.0627327	0.000273136
0.09744	0.032783	4.16274e-05	0.000201354	-0.0624596	2.99	2.09167	1.13652	0.00250354	0	0.000217725	-0.0627426	0.000283043
0.0986	0.0314646	4.16274e-05	0.000201354	-0.0624596	2.99	2.09167	-1.13652	0.00250354	0	0.000225622	-0.0627529	0.000293309
0.09976	0.0314646	4.16274e-05	0.000201354	-0.0624596	2.99	2.09167	0	0.00250354	0	0.000233805	-0.0627635	0.000303947
0.10092	0.0314646	4.16274e-05	0.000201354	-0.0624596	2.99	2.09167	0	0.00250354	0	0.000242285	-0.0627746	0.000314971
0.10208	0.0308787	4.16274e-05	0.000201354	-0.0624596	2.99	2.09167	-0.505119	0.00250354	0	0.000251073	-0.062786	0.000326395
0.10324	0.0314646	4.16274e-05	0.000201354	-0.0624596	2.99	2.09167	0.505119	0.00250354	0	0.000260179	-0.0627978	0.000338233
0.1044	0.0343943	4.16274e-05	0.000201354	-0.0624596	2.99	2.09167	2.52559	0.00250354	0	0.000269616	-0.0628101	0.0003505
0.10556	0.0316111	4.16274e-05	0.000201354	-0.0624596	2.99	2.09167	-2.39931	0.00250354	0	0.000279394	-0.0628228	0.000363213
0.10672	0.0313181	4.16274e-05	0.000201354	-0.0624596	2.99	2.09167	-0.252559	0.00250354	0	0.000289528	-0.062836	0.000376386
0.10788	0.0310251	4.16274e-05	0.000201354	-0.0624596	2.99	2.09167	-0.252559	0.00250354	0	0.000300029	-0.0628496	0.000390038
0.10904	0.0314646	4.16274e-05	0.000201354	-0.0624596	2.99	2.09167	0.378839	0.00250354	0	0.000310911	-0.0628638	0.000404184
0.1102	0.0313181	4.16274e-05	0.000201354	-0.0624596	2.99	2.09167	-0.12628	0.00250354	0	0.000322187	-0.0628784	0.000418844
0.11136	0.0313181	4.16274e-05	0.000201354	-0.0624596	2.99	2.09167	0	0.00250354	0	0.000333873	-0.0628936	0.000434035
0.11252	0.0316111	4.16274e-05	0.000201354	-0.0624596	2.99	2.09167	0.252559	0.00250354	0	0.000345982	-0.0629094	0.000449777
0.11368	0.0298533	4.16274e-05	0.000201354	-0.0624596	2.99	2.09167	-1.51536	0.00250354	0	0.000358531	-0.0629257	0.00046609
0.11484	0.0320505	4.16274e-05	0.000201354	-0.0624596	2.99	2.09167	1.89419	0.00250354	0	0.000371535	-0.0629426	0.000482995
0.116	0.031904	4.16274e-05	0.000201354	-0.0624596	2.99	2.09167	-0.12628	0.00250354	0	0.00038501	-0.0629601	0.000500513
0.11716	0.0330759	4.16274e-05	0.000201354	-0.0624596	2.99	2.09167	1.01024	0.00250354	0	0.000398974	-0.0629783	0.000518666
0.11832	0.0311716	4.16274e-05	0.000201354	-0.0624596	2.99	2.09167	-1.64164	0.00250354	0	0.000413445	-0.0629971	0.000537478
0.11948	0.0316111	4.16274e-05	0.000201354	-0.0624596	2.99	2.09167	0.378839	0.00250354	0	0.00042844	-0.0630166	0.000556972
0.12064	0.0310251	4.16274e-05	0.000201354	-0.0624596	2.99	2.09167	-0.505119	0.00250354	0	0.000443979	-0.0630368	0.000577173
0.1218	0.0307322	4.16274e-05	0.000201354	-0.0624596	2.99	2.09167	-0.252559	0.00250354	0	0.000460082	-0.0630577	0.000598107
0.12296	0.0330759	4.16274e-05	0.000201354	-0.0624596	2.99	2.09167	2.02047	0.00250354	0	0.000476769	-0.0630794	0.0006198
0.12412	0.0313181	4.16274e-05	0.000201354	-0.0624596	2.99	2.09167	-1.51536	0.00250354	0	0.000494061	-0.0631019	0.00064228
0.12528	0.0314646	4.16274e-05	0.000201354	-0.0624596	2.99	2.09167	0.12628	0.00250354	0	0.000511981	-0.0631252	0.000665575
0.12644	0.0313181	4.16274e-05	0.000201354	-0.0624596	2.99	2.09167	-0.12628	0.00250354	0	0.00053055	-0.0631493	0.000689715
0.1276	0.0314646	4.16274e-05	0.000201354	-0.0624596	2.99	2.09167	0.12628	0.00250354	0	0.000549793	-0.0631743	0.00071473
0.12876	0.0317576	4.16274e-05	0.000201354	-0.0624596	2.99	2.09167	0.252559	0.00250354	0	0.000569733	-0.0632002	0.000740653
0.12992	0.0314646	4.16274e-05	0.000201354	-0.0624596	2.99	2.09167	-0.252559	0.00250354	0	0.000590397	-0.0632271	0.000767516
0.13108	0.0314646	4.16274e-05	0.000201354	-0.0624596	2.99	2.09167	0	0.00250354	0	0.00061181	-0.0632549	0.000795354
0.13224	0.0314646	4.16274e-05	0.000201354	-0.0624596	2.99	2.09167	0	0.00250354	0	0.000634	-0.0632838	0.000824201
0.1334	0.0313181	4.16274e-05	0.000201354	-0.0624596	2.99	2.09167	-0.12628	0.00250354	0	0.000656995	-0.0633137	0.000854094
0.13456	0.032197	4.16274e-05	0.000201354	-0.0624596	2.99	2.09167	0.757678	0.00250354	0	0.000680824	-0.0633447	0.000885071
0.13572	0.0317576	4.16274e-05	0.000201354	-0.0624596	2.99	2.09167	-0.378839	0.00250354	0	0.000705517	-0.0633768	0.000917172
0.13688	0.0313181	4.16274e-05	0.000201354	-0.0624596	2.99	2.09167	-0.378839	0.00250354	0	0.000731106	-0.06341	0.000950438
0.13804	0.0305857	4.16274e-05	0.000201354	-0.0624596	2.99	2.09167	-0.631398	0.00250354	0	0.000757623	-0.0634445	0.00098491
0.1392	0.0313181	4.16274e-05	0.000201354	-0.0624596	2.99	2.09167	0.631398	0.00250354	0	0.000785101	-0.0634802	0.00102063
0.14036	0.0299997	4.16274e-05	0.000201354	-0.0624596	2.99	2.09167	-1.13652	0.00250354	0	0.000813576	-0.0635172	0.00105765
0.14152	0.0316111	4.16274e-05	0.000201354	-0.0624596	2.99	2.09167	1.38908	0.00250354	0	0.000843084	-0.0635556	0.00109601
0.14268	0.0314646	4.16274e-05	0.000201354	-0.0624596	2.99	2.09167	-0.12628	0.00250354	0	0.000873663	-0.0635953	0.00113576
0.14384	0.0314646	4.16274e-05	0.000201354	-0.0624596	2.99	2.09167	0	0.00250354	0	0.00090535	-0.0636365	0.00117695
0.145	0.0314646	4.16274e-05	0.000201354	-0.0624596	2.99	2.09167	0	0.00250354	0	0.000938186	-0.0636792	0.00121964
0.14616	0.0313181	4.16274e-05	0.000201354	-0.0624596	2.99	2.09167	-0.12628	0.00250354	0	0.000972214	-0.0637235	0.00126388
0.14732	0.0311716	4.16274e-05	0.000201354	-0.0624596	2.99	2.09167	-0.12628	0.00250354	0	0.00100748	-0.0637693	0.00130972
0.14848	0.0317576	4.16274e-05	0.000201354	-0.0624596	2.99	2.09167	0.505119	0.00250354	0	0.00104402	-0.0638168	0.00135722
0.14964	0.0314646	4.16274e-05	0.000201354	-0.0624596	2.99	2.09167	-0.252559	0.00250354	0	0.00108188	-0.063866	0.00140645
0.1508	0.0313181	4.16274e-05	0.000201354	-0.0624596	2.99	2.09167	-0.12628	0.00250354	0	0.00112112	-0.063917	0.00145746
0.15196	0.0313181	4.16274e-05	0.000201354	-0.0624596	2.99	2.09167	0	0.00250354	0	0.00116178	-0.0639699	0.00151032
0.15312	0.0314646	4.16274e-05	0.000201354	-0.0624596	2.99	2.09167	0.12628	0.00250354	0	0.00120392	-0.0640247	0.0015651
0.15428	0.0316111	4.16274e-05	0.000201354	-0.0624596	2.99	2.09167	0.12628	0.00250354	0	0.00124759	-0.0640814	0.00162186
0.15544	0.0314646	4.16274e-05	0.000201354	-0.0624596	2.99	2.09167	-0.12628	0.00250354	0	0.00129284	-0.0641403	0.00168069
0.1566	0.0335154	4.16274e-05	0.000201354	-0.0624596	2.99	2.09167	1.76791	0.00250354	0	0.00133973	-0.0642012	0.00174164
0.15776	0.0313181	4.16274e-05	0.000201354	-0.0624596	2.99	2.09167	-1.89419	0.00250354	0	0.00138832	-0.0642644	0.00180481
0.15892	0.0310251	4.16274e-05	0.000201354	-0.0624596	2.99	2.09167	-0.252559	0.00250354	0	0.00143867	-0.0643299	0.00187027
0.16008	0.0310251	4.16274e-05	0.000201354	-0.0624596	2.99	2.09167	0	0.00250354	0	0.00149085	-0.0643977	0.00193811
0.16124	0.0314646	4.16274e-05	0.000201354	-0.0624596	2.99	2.09167	0.378839	0.00250354	0	0.00154492	-0.064468	0.0020084
0.1624	0.0323435	4.16274e-05	0.000201354	-0.0624596	2.99	2.09167	0.757678	0.00250354	0	0.00160096	-0.0645408	0.00208124
0.16356	0.0316111	4.16274e-05	0.000201354	-0.0624596	2.99	2.09167	-0.631398	0.00250354	0	0.00165902	-0.0646163	0.00215673
0.16472	0.0316111	4.16274e-05	0.000201354	-0.0624596	2.99	2.09167	0	0.00250354	0	0.00171919	-0.0646945	0.00223495
0.16588	0.0305857	4.16274e-05	0.000201354	-0.0624596	2.99	2.09167	-0.883957	0.00250354	0	0.00178155	-0.0647756	0.00231601
0.16704	0.0343943	4.16274e-05	0.000201354	-0.0624596	2.99	2.09167	3.28327	0.00250354	0	0.00184616	-0.0648596	0.00240001
0.1682	0.0365915	4.16274e-05	0.000201354	-0.0624596	2.99	2.09167	1.89419	0.00250354	0	0.00191312	-0.0649466	0.00248706
0.16936	0.031904	4.16274e-05	0.000201354	-0.0624596	2.99	2.09167	-4.04095	0.00250354	0	0.00198251	-0.0650368	0.00257726
0.17052	0.0298533	4.16274e-05	0.000201354	-0.0624596	2.99	2.09167	-1.76791	0.00250354	0	0.00205442	-0.0651303	0.00267074
0.17168	0.032783	4.16274e-05	0.000201354	-0.0624596	2.99	2.09167	2.52559	0.00250354	0	0.00212893	-0.0652272	0.00276761
0.17284	0.0336619	4.16274e-05	0.000201354	-0.0624596	2.99	2.09167	0.757678	0.00250354	0	0.00220614	-0.0653276	0.00286799
0.174	0.0311716	4.16274e-05	0.000201354	-0.0624596	2.99	2.09167	-2.14675	0.00250354	0	0.00228616	-0.0654316	0.00297201
0.17516	0.0316111	4.16274e-05	0.000201354	-0.0624596	2.99	2.09167	0.378839	0.00250354	0	0.00236908	-0.0655394	0.0030798
0.17632	0.0311716	4.16274e-05	0.000201354	-0.0624596	2.99	2.09167	-0.378839	0.00250354	0	0.002455	-0.0656511	0.0031915
0.17748	0.0313181	4.16274e-05	0.000201354	-0.0624596	2.99	2.09167	0.12628	0.00250354	0	0.00254404	-0.0657668	0.00330726
0.17864	0.0313181	4.16274e-05	0.000201354	-0.0624596	2.99	2.09167	0	0.00250354	0	0.00263631	-0.0658868	0.00342721
0.1798	0.0314646	4.16274e-05	0.000201354	-0.0624596	2.99	2.09167	0.12628	0.00250354	0	0.00273193	-0.0660111	0.00355151
0.18096	0.0313181	4.16274e-05	0.000201354	-0.0624596	2.99	2.09167	-0.12628	0.00250354	0	0.00283102	-0.0661399	0.00368032
0.18212	0.0314646	4.16274e-05	0.000201354	-0.0624596	2.99	2.09167	0.12628	0.00250354	0	0.0029337	-0.0662734	0.0038138
0.18328	0.0320505	4.16274e-05	0.000201354	-0.0624596	2.99	2.09167	0.505119	0.00250354	0	0.0030401	-0.0664117	0.00395213
0.18444	0.0314646	4.16274e-05	0.000201354	-0.0624596	2.99	2.09167	-0.505119	0.00250354	0	0.00315036	-0.0665551	0.00409547
0.1856	0.0326365	4.16274e-05	0.000201354	-0.0624596	2.99	2.09167	1.01024	0.00250354	0	0.00326462	-0.0667036	0.00424401
0.18676	0.0323435	4.16274e-05	0.000201354	-0.0624596	2.99	2.09167	-0.252559	0.00250354	0	0.00338303	-0.0668575	0.00439794
0.18792	0.0308787	4.16274e-05	0.000201354	-0.0624596	2.99	2.09167	-1.2628	0.00250354	0	0.00350573	-0.067017	0.00455745
0.18908	0.0313181	4.16274e-05	0.000201354	-0.0624596	2.99	2.09167	0.378839	0.00250354	0	0.00363288	-0.0671823	0.00472275
0.19024	0.0332224	4.16274e-05	0.000201354	-0.0624596	2.99	2.09167	1.64164	0.00250354	0	0.00376464	-0.0673536	0.00489404
0.1914	0.031904	4.16274e-05	0.000201354	-0.0624596	2.99	2.09167	-1.13652	0.00250354	0	0.00390119	-0.0675311	0.00507154
0.19256	0.0313181	4.16274e-05	0.000201354	-0.0624596	2.99	2.09167	-0.505119	0.00250354	0	0.00404268	-0.0677151	0.00525548
0.19372	0.0317576	4.16274e-05	0.000201354	-0.0624596	2.99	2.09167	0.378839	0.00250354	0	0.0041893	-0.0679057	0.0054461
0.19488	0.0307322	4.16274e-05	0.000201354	-0.0624596	2.99	2.09167	-0.883957	0.00250354	0	0.00434125	-0.0681032	0.00564362
0.19604	0.0343943	4.16274e-05	0.000201354	-0.0624596	2.99	2.09167	3.15699	0.00250354	0	0.0044987	-0.0683079	0.00584831
0.1972	0.0264841	4.16274e-05	0.000201354	-0.0624596	2.99	2.09167	-6.8191	0.00250354	0	0.00466187	-0.06852	0.00606043
0.19836	0.0314646	4.16274e-05	0.000201354	-0.0624596	2.99	2.09167	4.29351	0.00250354	0	0.00483095	-0.0687398	0.00628024
0.19952	0.032783	4.16274e-05	0.000201354	-0.0624596	2.99	2.09167	1.13652	0.00250354	0	0.00500617	-0.0689676	0.00650802
0.20068	0.0317576	4.16274e-05	0.000201354	-0.0624596	2.99	2.09167	-0.883957	0.00250354	0	0.00518774	-0.0692036	0.00674406
0.20184	0.0308787	4.16274e-05	0.000201354	-0.0624596	2.99	2.09167	-0.757678	0.00237153	-0.113803	0.0053759	-0.0694482	0.00698866
0.203	0.0308787	4.16274e-05	0.000201354	-0.0624596	2.99	2.09167	0	0.00258189	0.181346	0.00571534	-0.0698895	0.00742994
0.20416	0.0316111	4.16274e-05	0.000201354	-0.0624596	2.99	2.09167	0.631398	0.00279342	0.182348	0.00583183	-0.070041	0.00758139
0.20532	0.0314646	4.16274e-05	0.000201354	-0.0624596	2.99	2.09167	-0.12628	0.00272178	-0.061756	0.00572425	-0.0699011	0.00744153
0.20648	0.0314646	4.16274e-05	0.000201354	-0.0624596	2.99	2.09167	0	0.00270825	-0.0116612	0.00570233	-0.0698726	0.00741304
0.20764	0.0330759	4.16274e-05	0.000201354	-0.0624596	2.99	2.09167	1.38908	0.00269595	-0.0106103	0.00570246	-0.0698728	0.00741319
0.2088	0.0316111	4.16274e-05	0.000201354	-0.0624596	2.99	2.09167	-1.2628	0.00205913	-0.548978	0.00572329	-0.0698999	0.00744027
0.20996	0.0314646	4.16274e-05	0.000201354	-0.0624596	2.99	2.09167	-0.12628	0.00199208	-0.0578009	0.00644827	-0.0708423	0.00838276
0.21112	0.0316111	4.16274e-05	0.000201354	-0.0624596	2.99	2.09167	0.12628	0.00198281	-0.00798966	0.00725482	-0.0718908	0.00943127
0.21228	0.0314646	4.16274e-05	0.000201354	-0.0624596	2.99	2.09167	-0.12628	0.00191755	-0.0562578	0.00808072	-0.0729645	0.0105049
0.21344	0.0313181	4.16274e-05	0.000201354	-0.0624596	2.99	2.09167	-0.12628	0.00191004	-0.006475	0.00898829	-0.0741444	0.0116848
0.2146	0.0314646	4.16274e-05	0.000201354	-0.0624596	2.99	2.09167	0.12628	0.00196028	0.0433043	0.00991549	-0.0753497	0.0128901
0.21576	0.0317576	4.16274e-05	0.000201354	-0.0624596	2.99	2.09167	0.252559	0.00195451	-0.00497155	0.0108003	-0.0765	0.0140404
0.21692	0.0308787	7.09845e-05	0.000201354	-0.0480746	2.99	2.09167	-0.757678	0.00183585	-0.102289	0.0117051	-0.0632913	0.0152167
0.21808	0.0317576	7.09845e-05	0.000201354	-0.0480746	2.99	2.09167	0.757678	0.00205933	0.192651	0.0127547	-0.0646557	0.0165811
0.21924	0.0283884	7.09845e-05	0.000201354	-0.0480746	2.99	2.09167	-2.90443	0.00194243	-0.100776	0.0135759	-0.0657232	0.0176486
0.2204	0.0314646	7.09845e-05	0.000201354	-0.0480746	2.99	2.09167	2.65187	0.00313473	1.02785	0.0145422	-0.0669795	0.0189049
0.22156	0.0316111	7.09845e-05	0.000201354	-0.0480746	2.99	2.09167	0.12628	0.00313389	-0.00072931	0.0142222	-0.0665635	0.0184889
0.22272	0.0308787	7.09845e-05	0.000201354	-0.0480746	2.99	2.09167	-0.631398	0.00307757	-0.0485491	0.0139212	-0.0661722	0.0180976
0.22388	0.0326365	7.09845e-05	0.000201354	-0.0480746	2.99	2.09167	1.51536	0.00330706	0.197834	0.0136995	-0.065884	0.0178094
0.22504	0.0313181	7.09845e-05	0.000201354	-0.0480746	2.99	2.09167	-1.13652	0.00285543	-0.389335	0.0132441	-0.0652919	0.0172173
0.2262	0.0317576	7.09845e-05	0.000201354	-0.0480746	2.99	2.09167	0.378839	0.00291704	0.0531138	0.0132997	-0.0653642	0.0172896
0.22736	0.0311716	7.09845e-05	0.000201354	-0.0480746	2.99	2.09167	-0.505119	0.00280932	-0.0928664	0.0133047	-0.0653708	0.0172961
0.22852	0.0313181	7.09845e-05	0.000201354	-0.0480746	2.99	2.09167	0.12628	0.00293039	0.104376	0.0134446	-0.0655525	0.0174779
0.22968	0.0314646	7.09845e-05	0.000201354	-0.0480746	2.99	2.09167	0.12628	0.0029959	0.0564759	0.013469	-0.0655843	0.0175097
0.23084	0.0313181	7.09845e-05	0.000201354	-0.0480746	2.99	2.09167	-0.12628	0.00300588	0.00860086	0.0134388	-0.065545	0.0174704
0.232	0.0314646	7.09845e-05	0.000201354	-0.0480746	2.99	2.09167	0.12628	0.0030741	0.0588069	0.0134147	-0.0655138	0.0174392
0.23316	0.0314646	7.09845e-05	0.000201354	-0.0480746	2.99	2.09167	0	0.00308681	0.0109621	0.0133331	-0.0654076	0.017333
0.23432	0.0314646	7.09845e-05	0.000201354	-0.0480746	2.99	2.09167	0	0.00310092	0.0121612	0.0132544	-0.0653053	0.0172307
0.23548	0.0313181	7.09845e-05	0.000201354	-0.0480746	2.99	2.09167	-0.12628	0.00311642	0.0133655	0.0131771	-0.0652049	0.0171303
0.23664	0.0314646	7.09845e-05	0.000201354	-0.0480746	2.99	2.09167	0.12628	0.00319021	0.0636129	0.0130996	-0.0651041	0.0170295
0.2378	0.0313181	7.09845e-05	0.000201354	-0.0480746	2.99	2.09167	-0.12628	0.00320856	0.0158138	0.012958	-0.06492	0.0168454
0.23896	0.0314646	7.09845e-05	0.000201354	-0.0480746	2.99	2.09167	0.12628	0.00328523	0.0660983	0.0128127	-0.0647312	0.0166565
0.24012	0.0329294	7.09845e-05	0.000201354	-0.0480746	2.99	2.09167	1.2628	0.0033065	0.0183362	0.0125998	-0.0644544	0.0163798
0.24128	0.0314646	7.09845e-05	0.000201354	-0.0480746	2.99	2.09167	-1.2628	0.00276042	-0.470759	0.0123796	-0.0641681	0.0160935
0.24244	0.0314646	7.09845e-05	0.000201354	-0.0480746	2.99	2.09167	0	0.00278443	0.0206922	0.0127728	-0.0646792	0.0166046
0.2436	0.0313181	0.000168978	0.000201354	-5.79867e-05	2.99	2.09167	-0.12628	0.00280968	0.0217733	0.0131558	-0.0171606	0.0171026
0.24476	0.0314646	0.000168978	0.000201354	-5.79867e-05	2.99	2.09167	0.12628	0.00289309	0.0719017	0.013528	-0.0176443	0.0175864
0.24592	0.0314646	0.000168978	0.000201354	-5.79867e-05	2.99	2.09167	0	0.00292092	0.0239879	0.013826	-0.0180318	0.0179738
0.24708	0.0311716	0.000168978	0.000201354	-5.79867e-05	2.99	2.09167	-0.252559	0.00295006	0.0251224	0.0141111	-0.0184025	0.0183445
0.24824	0.0335154	0.000168978	0.000201354	-5.79867e-05	2.99	2.09167	2.02047	0.00309429	0.124343	0.0143823	-0.018755	0.018697
0.2494	0.0311716	0.000168978	0.000201354	-5.79867e-05	2.99	2.09167	-2.02047	0.00232978	-0.65906	0.0145139	-0.018926	0.018868
0.25056	0.0311716	0.000168978	0.000201354	-5.79867e-05	2.99	2.09167	0	0.00247647	0.126449	0.0155005	-0.0202086	0.0201506
0.25172	0.0323435	0.000168978	0.000201354	-5.79867e-05	2.99	2.09167	1.01024	0.00262426	0.127411	0.0163463	-0.0213081	0.0212501
0.25288	0.0314646	0.000168978	0.000201354	-5.79867e-05	2.99	2.09167	-0.757678	0.00231817	-0.263872	0.017051	-0.0222243	0.0221664
0.25404	0.032783	0.000168978	0.000201354	-5.79867e-05	2.99	2.09167	1.13652	0.00235443	0.0312552	0.0181124	-0.0236042	0.0235462
0.2552	0.031904	0.000168978	0.000201354	-5.79867e-05	2.99	2.09167	-0.757678	0.00187979	-0.409172	0.0191572	-0.0249623	0.0249043
0.25636	0.0314646	0.000168978	0.000201354	-5.79867e-05	2.99	2.09167	-0.378839	0.0017473	-0.114214	0.0207456	-0.0270273	0.0269693
0.25752	0.0314646	0.000168978	0.000201354	-5.79867e-05	2.99	2.09167	0	0.00178625	0.0335776	0.0225054	-0.029315	0.029257
0.25868	0.0313181	0.000168978	0.000201354	-5.79867e-05	2.99	2.09167	-0.12628	0.001826	0.0342716	0.0242511	-0.0315844	0.0315265
0.25984	0.0314646	0.000168978	0.000201354	-5.79867e-05	2.99	2.09167	0.12628	0.00192347	0.0840181	0.0259841	-0.0338373	0.0337794
0.261	0.0314646	0.000168978	0.000201354	-5.79867e-05	2.99	2.09167	0	0.00196491	0.0357267	0.0276434	-0.0359945	0.0359365
0.26216	0.0314646	0.000168978	0.000201354	-5.79867e-05	2.99	2.09167	0	0.00200724	0.0364905	0.0292925	-0.0381383	0.0380803
0.26332	0.0313181	0.000168978	0.000201354	-5.79867e-05	2.99	2.09167	-0.12628	0.00205047	0.0372698	0.0309324	-0.0402702	0.0402122
0.26448	0.0314646	0.000168978	0.000201354	-5.79867e-05	2.99	2.09167	0.12628	0.00215151	0.0871043	0.0325643	-0.0423916	0.0423336
0.26564	0.0311716	0.000168978	0.000201354	-5.79867e-05	2.99	2.09167	-0.252559	0.00219664	0.0389017	0.034127	-0.0444231	0.0443651
0.2668	0.0311716	0.000168978	0.000201354	-5.79867e-05	2.99	2.09167	0	0.00235652	0.13783	0.0356836	-0.0464466	0.0463886
0.26796	0.0313181	0.000168978	0.000201354	-5.79867e-05	2.99	2.09167	0.12628	0.00251747	0.138745	0.0371105	-0.0483016	0.0482436
0.26912	0.0313181	0.000168978	0.000201354	-5.79867e-05	2.99	2.09167	0	0.00262266	0.0906853	0.0384084	-0.0499889	0.0499309
0.27028	0.0310251	0.000168978	0.000201354	-5.79867e-05	2.99	2.09167	-0.252559	0.00272904	0.0917034	0.0396399	-0.0515899	0.0515319
0.27144	0.0317576	0.000168978	0.000201354	-5.79867e-05	2.99	2.09167	0.631398	0.00295041	0.190839	0.0408054	-0.053105	0.053047
0.2726	0.0316111	0.000168978	0.000201354	-5.79867e-05	2.99	2.09167	-0.12628	0.00288869	-0.0532043	0.0417804	-0.0543725	0.0543145
0.27376	0.0317576	0.000168978	0.000201354	-5.79867e-05	2.99	2.09167	0.12628	0.00288516	-0.00304483	0.042876	-0.0557967	0.0557387
0.27492	0.0314646	0.000168978	0.000201354	-5.79867e-05	2.99	2.09167	-0.252559	0.00282604	-0.0509621	0.0440298	-0.0572968	0.0572388
0.27608	0.0314646	0.000168978	0.000201354	-5.79867e-05	2.99	2.09167	0	0.00288197	0.0482112	0.0453043	-0.0589535	0.0588956
0.27724	0.0323435	0.000168978	0.000201354	-5.79867e-05	2.99	2.09167	0.757678	0.00293919	0.0493293	0.046575	-0.0606055	0.0605475
0.2784	0.0317576	0.000168978	0.000201354	-5.79867e-05	2.99	2.09167	-0.505119	0.00265643	-0.243755	0.0478423	-0.062253	0.062195
0.27956	0.0345408	0.000168978	0.000201354	-5.79867e-05	2.99	2.09167	2.39931	0.00260241	-0.0465733	0.0494797	-0.0643816	0.0643236
0.28072	0.0317576	0.000168978	0.000201354	-5.79867e-05	2.99	2.09167	-2.39931	0.00146876	-0.977281	0.0512391	-0.0666688	0.0666108
0.28188	0.0313181	0.000168978	0.000201354	-5.79867e-05	2.99	2.09167	-0.378839	0.00141657	-0.0449914	0.0543041	-0.0706533	0.0705953
0.28304	0.0316111	0.000168978	0.000201354	-5.79867e-05	2.99	2.09167	0.252559	0.00153567	0.102672	0.0574951	-0.0748016	0.0747436
0.2842	0.0316111	0.000168978	0.000201354	-5.79867e-05	2.99	2.09167	0	0.0015417	0.00519224	0.0606288	-0.0788754	0.0788174
0.28536	0.0314646	0.000168978	0.000201354	-5.79867e-05	2.99	2.09167	-0.12628	0.00154841	0.00579138	0.0638329	-0.0830407	0.0829827
0.28652	0.0314646	0.000168978	0.000201354	-5.79867e-05	2.99	2.09167	0	0.00161271	0.0554302	0.0671106	-0.0873018	0.0872438
0.28768	0.0317576	0.000168978	0.000201354	-5.79867e-05	2.99	2.09167	0.252559	0.00167774	0.0560569	0.0704032	-0.0915821	0.0915241
0.28884	0.0307322	0.000168978	0.000201354	-5.79867e-05	2.99	2.09167	-0.883957	0.00162975	-0.0413681	0.073714	-0.0958861	0.0958282
0.29	0.0291208	0.000168978	0.000201354	-5.79867e-05	2.99	2.09167	-1.38908	0.00198069	0.30253	0.0771708	-0.10038	0.100322
0.29116	0.0311716	0.000168978	0.000201354	-5.79867e-05	2.99	2.09167	1.76791	0.00295824	0.842716	0.0803416	-0.104502	0.104444
0.29232	0.0313181	0.000168978	0.000201354	-5.79867e-05	2.99	2.09167	0.12628	0.00314074	0.157334	0.0825447	-0.107366	0.107308
0.29348	0.0314646	0.000168978	0.000201354	-5.79867e-05	2.99	2.09167	0.12628	0.00326778	0.109516	0.0846527	-0.110107	0.110049
0.29464	0.0317576	0.000168978	0.000201354	-5.79867e-05	2.99	2.09167	0.252559	0.00333941	0.0617474	0.0867292	-0.112806	0.112748
0.2958	0.0323435	0.000168978	0.000201354	-5.79867e-05	2.99	2.09167	0.505119	0.00329877	-0.0350319	0.0888375	-0.115547	0.115489
0.29696	0.0310251	0.000168978	0.000201354	-5.79867e-05	2.99	2.09167	-1.13652	0.00303209	-0.229902	0.0911029	-0.118492	0.118434
0.29812	0.032783	0.000191787	0.000201354	0.0111185	2.99	2.09167	1.51536	0.00327872	0.212616	0.0937759	-0.11079	0.121909
0.29928	0.0314646	0.000224978	0.000201354	0.0273823	2.99	2.09167	-1.13652	0.00284423	-0.374565	0.096298	-0.0978051	0.125187
0.30044	0.0313181	0.000259769	0.000201354	0.0444296	2.99	2.09167	-0.12628	0.00292297	0.0678802	0.0994178	-0.0848135	0.129243
0.3016	0.0314646	0.000297549	0.000201354	0.0629418	2.99	2.09167	0.12628	0.00305991	0.118053	0.102578	-0.0704091	0.133351
0.30276	0.0313181	0.000328712	0.000201354	0.078212	2.99	2.09167	-0.12628	0.00314135	0.0702034	0.105718	-0.0592212	0.137433
0.30392	0.0314646	0.000359872	0.000201354	0.0934804	2.99	2.09167	0.12628	0.00328108	0.120461	0.108903	-0.0480938	0.141574
0.30508	0.0314646	0.000395441	0.000201354	0.110909	2.99	2.09167	0	0.00336541	0.0726983	0.112074	-0.0347867	0.145696
0.30624	0.0313181	0.00044011	0.000201354	0.132797	2.99	2.09167	-0.12628	0.00345126	0.0740043	0.115294	-0.017086	0.149883
0.3074	0.0323435	0.000486474	0.000201354	0.155515	2.99	2.09167	0.883957	0.00359554	0.124383	0.118567	0.00137761	0.154138
0.30856	0.0310251	0.00053538	0.000201354	0.179479	2.99	2.09167	-1.13652	0.00334326	-0.217486	0.121833	0.0210963	0.158383
0.30972	0.0314646	0.000577777	0.000201354	0.200254	2.99	2.09167	0.378839	0.00360443	0.225153	0.12553	0.0370655	0.163188
0.31088	0.0310251	0.000615884	0.000201354	0.218926	2.99	2.09167	-0.378839	0.00369658	0.0794397	0.129099	0.0510967	0.167829
0.31204	0.0314646	0.000657965	0.000201354	0.239546	2.99	2.09167	0.378839	0.00396105	0.227988	0.132732	0.0669935	0.172552
0.3132	0.0307322	0.000707889	0.000201354	0.264008	2.99	2.09167	-0.631398	0.00405665	0.0824121	0.136244	0.0868906	0.177118
0.31436	0.0314646	0.000759079	0.000201354	0.289092	2.99	2.09167	0.631398	0.00443849	0.329178	0.139825	0.10732	0.181772
0.31552	0.0317576	0.000812934	0.000201354	0.315481	2.99	2.09167	0.252559	0.00453792	0.0857112	0.143165	0.129367	0.186114
0.31668	0.0314646	0.000872778	0.000201354	0.344804	2.99	2.09167	-0.252559	0.00452562	-0.0106017	0.146578	0.154253	0.190551
0.31784	0.0280955	0.000927088	0.000201354	0.371416	2.99	2.09167	-2.90443	0.00462913	0.089231	0.15019	0.176169	0.195247
0.319	0.0313181	0.000986614	0.000201354	0.400584	2.99	2.09167	2.77815	0.00604305	1.2189	0.15388	0.20054	0.200044
0.32016	0.0313181	0.00105358	0.000201354	0.433397	2.99	2.09167	0	0.00620825	0.142413	0.156218	0.230314	0.203083
0.32132	0.0317576	0.00112059	0.000201354	0.466234	2.99	2.09167	0.378839	0.00637625	0.144824	0.158573	0.260089	0.206145
0.32248	0.0307322	0.00119044	0.000201354	0.500457	2.99	2.09167	-0.883957	0.00637646	0.000187069	0.160946	0.291227	0.20923
0.32364	0.0308787	0.00126589	0.000201354	0.537427	2.99	2.09167	0.12628	0.00677774	0.345928	0.163523	0.324847	0.21258
0.3248	0.0313181	0.00133626	0.000201354	0.571908	2.99	2.09167	0.378839	0.00712519	0.299522	0.165869	0.356279	0.215629
0.32596	0.0313181	0.0014079	0.000201354	0.607014	2.99	2.09167	0	0.00730519	0.155176	0.168044	0.388556	0.218458
0.32712	0.0307322	0.00148635	0.000201354	0.645455	2.99	2.09167	-0.505119	0.00748848	0.158011	0.170236	0.424147	0.221307
0.32828	0.0313181	0.00156669	0.000201354	0.684822	2.99	2.09167	0.505119	0.00790269	0.357072	0.172444	0.460645	0.224177
0.32944	0.0314646	0.00164869	0.000201354	0.725001	2.99	2.09167	0.12628	0.00809291	0.163989	0.174417	0.498258	0.226742
0.3306	0.0313181	0.00173375	0.000201354	0.766681	2.99	2.09167	-0.12628	0.0082299	0.118094	0.176404	0.537356	0.229325
0.33176	0.0313181	0.00181422	0.000201354	0.80611	2.99	2.09167	0	0.00842748	0.170328	0.178464	0.574106	0.232003
0.33292	0.0348337	0.00189123	0.000201354	0.843844	2.99	2.09167	3.03071	0.00862886	0.1736	0.180535	0.609148	0.234695
0.33408	0.0313181	0.00197333	0.000201354	0.884076	2.99	2.09167	-3.03071	0.00746891	-0.999957	0.182614	0.646677	0.237399
0.33524	0.0314646	0.00206498	0.000201354	0.928981	2.99	2.09167	0.12628	0.00767753	0.179851	0.186195	0.686927	0.242054
0.3364	0.0314646	0.00215767	0.000201354	0.974402	2.99	2.09167	0	0.00783274	0.133795	0.189784	0.727682	0.246719
0.33756	0.0314646	0.00225284	0.000201354	1.02103	2.99	2.09167	0	0.00799147	0.136837	0.193444	0.769556	0.251477
0.33872	0.0314646	0.00235601	0.000201354	1.07159	2.99	2.09167	0	0.0081538	0.13994	0.197176	0.815261	0.256329
0.33988	0.0314646	0.0024557	0.000201354	1.12044	2.99	2.09167	0	0.0083198	0.143106	0.20098	0.859162	0.261274
0.34104	0.0308787	0.00255964	0.000201354	1.17137	2.99	2.09167	-0.505119	0.00848955	0.146337	0.204858	0.905051	0.266316
0.3422	0.0314646	0.00267201	0.000201354	1.22643	2.99	2.09167	0.505119	0.00889066	0.345785	0.20881	0.954972	0.271453
0.34336	0.0314646	0.0027846	0.000201354	1.2816	2.99	2.09167	0	0.00906824	0.153086	0.212589	1.00523	0.276365
0.34452	0.0313181	0.00289967	0.000201354	1.33798	2.99	2.09167	-0.12628	0.00924991	0.156607	0.216442	1.0566	0.281375
0.34568	0.0314646	0.00302249	0.000201354	1.39816	2.99	2.09167	0.12628	0.00949262	0.209238	0.220372	1.11168	0.286484
0.34684	0.031904	0.0031413	0.000201354	1.45638	2.99	2.09167	0.378839	0.00968273	0.163885	0.224316	1.16477	0.291611
0.348	0.0311716	0.00325972	0.000201354	1.51441	2.99	2.09167	-0.631398	0.00970655	0.0205328	0.228337	1.21757	0.296838
0.34916	0.0313181	0.00338523	0.000201354	1.57591	2.99	2.09167	0.12628	0.0100192	0.269491	0.232621	1.2735	0.302408
0.35032	0.0341013	0.00350937	0.000201354	1.63673	2.99	2.09167	2.39931	0.0102794	0.224343	0.236859	1.32882	0.307917
0.35148	0.0316111	0.00363438	0.000201354	1.69799	2.99	2.09167	-2.14675	0.00946347	-0.703383	0.241112	1.38454	0.313446
0.35264	0.0330759	0.00376611	0.000201354	1.76253	2.99	2.09167	1.2628	0.00961884	0.133934	0.246565	1.442	0.320534
0.3538	0.031904	0.0038936	0.000201354	1.82501	2.99	2.09167	-1.01024	0.00920969	-0.352708	0.25216	1.4972	0.327809
0.35496	0.0320505	0.00401885	0.000201354	1.88638	2.99	2.09167	0.12628	0.00925977	0.0431707	0.258524	1.5503	0.336081
0.35612	0.0298533	0.0041507	0.000201354	1.95099	2.99	2.09167	-1.89419	0.00925714	-0.00227155	0.26516	1.60628	0.344709
0.35728	0.0314646	0.00428125	0.000201354	2.01496	2.99	2.09167	1.38908	0.0101119	0.736891	0.272137	1.66118	0.353778
0.35844	0.0313181	0.0044122	0.000201354	2.07912	2.99	2.09167	-0.12628	0.0103456	0.201402	0.278523	1.71704	0.36208
0.3596	0.0316111	0.00454856	0.000201354	2.14594	2.99	2.09167	0.252559	0.0106407	0.254457	0.285007	1.77543	0.370509
0.36076	0.0298533	0.00469397	0.000201354	2.21719	2.99	2.09167	-1.51536	0.0108269	0.160513	0.29153	1.8382	0.378989
0.36192	0.0314646	0.00483611	0.000201354	2.28684	2.99	2.09167	1.38908	0.0117006	0.753172	0.298219	1.89915	0.387685
0.36308	0.0314646	0.00498358	0.000201354	2.3591	2.99	2.09167	0	0.0119538	0.2183	0.304331	1.96347	0.39563
0.36424	0.0314646	0.0051304	0.000201354	2.43104	2.99	2.09167	0	0.0122124	0.222941	0.310552	2.02732	0.403717
0.3654	0.0316111	0.00527662	0.000201354	2.50269	2.99	2.09167	0.12628	0.0124766	0.227684	0.316884	2.09074	0.411949
0.36656	0.0313181	0.00542754	0.000201354	2.57664	2.99	2.09167	-0.252559	0.0126894	0.183491	0.323329	2.15631	0.420328
0.36772	0.0314646	0.00558708	0.000201354	2.65481	2.99	2.09167	0.12628	0.0130217	0.286494	0.329952	2.22588	0.428937
0.36888	0.0313181	0.00574376	0.000201354	2.73159	2.99	2.09167	-0.12628	0.0133031	0.242513	0.33663	2.29397	0.437619
0.37004	0.0308787	0.00590343	0.000201354	2.80982	2.99	2.09167	-0.378839	0.0136472	0.296716	0.343427	2.36337	0.446455
0.3712	0.0305857	0.00606506	0.000201354	2.88902	2.99	2.09167	-0.252559	0.0141682	0.44913	0.350284	2.43365	0.455369
0.37236	0.0297068	0.00622541	0.000201354	2.96759	2.99	2.09167	-0.757678	0.0148094	0.552708	0.357015	2.50347	0.46412
0.37352	0.0313181	0.00638732	0.000201354	3.04693	2.99	2.09167	1.38908	0.0157985	0.852685	0.363498	2.57438	0.472548
0.37468	0.0304392	0.00655745	0.000201354	3.13029	2.99	2.09167	-0.757678	0.016169	0.319403	0.36936	2.65013	0.480168
0.37584	0.0314646	0.00672516	0.000201354	3.21247	2.99	2.09167	0.883957	0.0168881	0.61991	0.375285	2.7246	0.487871
0.377	0.0314646	0.00689162	0.000201354	3.29404	2.99	2.09167	0	0.0172166	0.283203	0.3809	2.79887	0.49517
0.37816	0.0314646	0.00706434	0.000201354	3.37867	2.99	2.09167	0	0.0175529	0.289889	0.386639	2.87604	0.502631
0.37932	0.0311716	0.00723514	0.000201354	3.46236	2.99	2.09167	-0.252559	0.0178971	0.296705	0.392501	2.95211	0.510251
0.38048	0.0314646	0.00740547	0.000201354	3.54582	2.99	2.09167	0.252559	0.0183631	0.401731	0.398484	3.02779	0.518029
0.38164	0.0314646	0.00758228	0.000201354	3.63246	2.99	2.09167	0	0.0187236	0.310785	0.404463	3.10666	0.525802
0.3828	0.031904	0.00776923	0.000201354	3.72406	2.99	2.09167	0.378839	0.0190925	0.318057	0.410561	3.19034	0.533729
0.38396	0.0316111	0.00795403	0.000201354	3.81462	2.99	2.09167	-0.252559	0.0192994	0.178358	0.416776	3.27281	0.541809
0.38512	0.0314646	0.00814446	0.000201354	3.90793	2.99	2.09167	-0.12628	0.0196288	0.283928	0.423294	3.35764	0.550283
0.38628	0.0297068	0.00833208	0.000201354	3.99986	2.99	2.09167	-1.51536	0.0200239	0.340588	0.429989	3.44088	0.558986
0.38744	0.0308787	0.00851753	0.000201354	4.09073	2.99	2.09167	1.01024	0.0211106	0.936818	0.436798	3.5229	0.567837
0.3886	0.0314646	0.00870997	0.000201354	4.18503	2.99	2.09167	0.505119	0.0217517	0.552713	0.442972	3.60916	0.575863
0.38976	0.0316111	0.00891167	0.000201354	4.28386	2.99	2.09167	0.12628	0.0221751	0.365008	0.449006	3.70015	0.583708
0.39092	0.0314646	0.00911092	0.000201354	4.38149	2.99	2.09167	-0.12628	0.0225516	0.324582	0.455147	3.7898	0.591691
0.39208	0.0313181	0.00931384	0.000201354	4.48092	2.99	2.09167	-0.12628	0.0229952	0.382377	0.461454	3.88103	0.59989
0.39324	0.0313181	0.00951421	0.000201354	4.5791	2.99	2.09167	0	0.023506	0.440345	0.467861	3.97088	0.60822
0.3944	0.0316111	0.00971156	0.000201354	4.67581	2.99	2.09167	0.252559	0.0240274	0.449472	0.474303	4.05921	0.616594
0.39556	0.0313181	0.00991341	0.000201354	4.77471	2.99	2.09167	-0.252559	0.0244458	0.360727	0.480777	4.1497	0.62501
0.39672	0.0314646	0.0101237	0.000201354	4.87775	2.99	2.09167	0.12628	0.024989	0.468297	0.487403	4.24413	0.633624
0.39788	0.0313181	0.0103332	0.000201354	4.9804	2.99	2.09167	-0.12628	0.0254866	0.428962	0.494053	4.33813	0.642269
0.39904	0.0314646	0.0105419	0.000201354	5.08268	2.99	2.09167	0.12628	0.0260526	0.487897	0.500786	4.43166	0.651022
0.4002	0.031904	0.0107473	0.000201354	5.18332	2.99	2.09167	0.378839	0.0265734	0.448976	0.507536	4.52352	0.659796
0.40136	0.0314646	0.0109499	0.000201354	5.28261	2.99	2.09167	-0.378839	0.0269355	0.312182	0.514359	4.61395	0.668667
0.40252	0.0314646	0.0111532	0.000201354	5.38223	2.99	2.09167	0	0.0274805	0.469755	0.52144	4.70436	0.677871
0.40368	0.0323435	0.0113633	0.000201354	5.48517	2.99	2.09167	0.757678	0.0280378	0.480427	0.528585	4.79801	0.687161
0.40484	0.0316111	0.0115839	0.000201354	5.59325	2.99	2.09167	-0.631398	0.0282664	0.197087	0.535793	4.89672	0.69653
0.406	0.0316111	0.0118029	0.000201354	5.70057	2.99	2.09167	0	0.0287922	0.453253	0.54343	4.99411	0.706458
0.40716	0.0336619	0.0120189	0.000201354	5.80639	2.99	2.09167	1.76791	0.0293309	0.464434	0.551181	5.08985	0.716535
0.40832	0.031904	0.0122318	0.000201354	5.91074	2.99	2.09167	-1.51536	0.0290865	-0.210705	0.559043	5.18398	0.726755
0.40948	0.0311716	0.0124411	0.000201354	6.01327	2.99	2.09167	-0.631398	0.0295378	0.389043	0.567881	5.27502	0.738246
0.41064	0.031904	0.0126558	0.000201354	6.11847	2.99	2.09167	0.631398	0.0302868	0.645703	0.576947	5.36844	0.750031
0.4118	0.0307322	0.012879	0.000201354	6.22787	2.99	2.09167	-1.01024	0.030765	0.412275	0.585926	5.46617	0.761703
0.41296	0.0292673	0.0131005	0.000201354	6.3364	2.99	2.09167	-1.2628	0.0317122	0.816524	0.595124	5.56274	0.773662
0.41412	0.0313181	0.0133231	0.000201354	6.44546	2.99	2.09167	1.76791	0.0332425	1.31922	0.604042	5.66021	0.785255
0.41528	0.0323435	0.0135419	0.000201354	6.55267	2.99	2.09167	0.883957	0.0339914	0.645597	0.612052	5.757	0.795668
0.41644	0.0317576	0.0137556	0.000201354	6.65741	2.99	2.09167	-0.505119	0.0343574	0.315532	0.62002	5.85138	0.806026
0.4176	0.0316111	0.0139721	0.000201354	6.76349	2.99	2.09167	-0.12628	0.0349664	0.525025	0.628374	5.94661	0.816886
0.41876	0.0314646	0.0141956	0.000201354	6.87299	2.99	2.09167	-0.12628	0.0356481	0.587641	0.636859	6.04507	0.827916
0.41992	0.0314646	0.0144245	0.000201354	6.98514	2.99	2.09167	0	0.0364027	0.650522	0.645406	6.14611	0.839028
0.42108	0.0320505	0.0146526	0.000201354	7.09689	2.99	2.09167	0.505119	0.0371737	0.664659	0.653947	6.24676	0.850132
0.42224	0.0314646	0.0148755	0.000201354	7.20615	2.99	2.09167	-0.505119	0.0377339	0.482942	0.662475	6.34494	0.861217
0.4234	0.0316111	0.0150941	0.000201354	7.31323	2.99	2.09167	0.12628	0.0385387	0.693747	0.67123	6.44063	0.8726
0.42456	0.0316111	0.0153129	0.000201354	7.42047	2.99	2.09167	0	0.0393039	0.659675	0.679957	6.53653	0.883944
0.42572	0.0316111	0.0155377	0.000201354	7.53061	2.99	2.09167	0	0.0400868	0.674937	0.68871	6.63529	0.895323
0.42688	0.0316111	0.0157726	0.000201354	7.64572	2.99	2.09167	0	0.0408878	0.690504	0.69748	6.739	0.906724
0.42804	0.0316111	0.0160054	0.000201354	7.75979	2.99	2.09167	0	0.0417072	0.706383	0.706259	6.84166	0.918136
0.4292	0.0292673	0.0162323	0.000201354	7.87099	2.99	2.09167	-2.02047	0.0425454	0.722578	0.715038	6.94144	0.929549
0.43036	0.0316111	0.0164549	0.000201354	7.98004	2.99	2.09167	2.02047	0.0443129	1.52371	0.723807	7.03909	0.940949
0.43152	0.0311716	0.0166751	0.000201354	8.08793	2.99	2.09167	-0.378839	0.0451902	0.756308	0.731561	7.1369	0.951029
0.43268	0.0316111	0.0169001	0.000201354	8.19822	2.99	2.09167	0.378839	0.0462585	0.920969	0.739283	7.23715	0.961068
0.43384	0.032197	0.0171338	0.000201354	8.3127	2.99	2.09167	0.505119	0.047177	0.79182	0.746775	7.34189	0.970807
0.435	0.031904	0.017364	0.000201354	8.42549	2.99	2.09167	-0.252559	0.0478893	0.613989	0.754209	7.44502	0.980472
0.43616	0.031904	0.0175821	0.000201354	8.53235	2.99	2.09167	0	0.0487368	0.73066	0.761822	7.54198	0.990368
0.43732	0.0314646	0.0177961	0.000201354	8.63722	2.99	2.09167	-0.378839	0.0496063	0.749587	0.769474	7.63691	1.00032
0.43848	0.0317576	0.0180072	0.000201354	8.74069	2.99	2.09167	0.252559	0.0506689	0.915964	0.777151	7.7304	1.0103
0.43964	0.0316111	0.0182211	0.000201354	8.8455	2.99	2.09167	-0.12628	0.0516404	0.837564	0.784652	7.82545	1.02005
0.4408	0.0320505	0.018442	0.000201354	8.95372	2.99	2.09167	0.378839	0.0526922	0.906655	0.792086	7.92401	1.02971
0.44196	0.031904	0.0186611	0.000201354	9.06109	2.99	2.09167	-0.12628	0.053597	0.780003	0.799375	8.0219	1.03919
0.44312	0.0311716	0.0188684	0.000201354	9.16266	2.99	2.09167	-0.631398	0.0545828	0.849854	0.806688	8.11397	1.04869
0.44428	0.0316111	0.0190698	0.000201354	9.26132	2.99	2.09167	0.378839	0.0558776	1.11624	0.813946	8.20319	1.05813
0.44544	0.03249	0.0192694	0.000201354	9.35913	2.99	2.09167	0.757678	0.057027	0.990825	0.820821	8.29206	1.06707
0.4466	0.032197	0.0194693	0.000201354	9.45708	2.99	2.09167	-0.252559	0.0578607	0.718744	0.82748	8.38136	1.07572
0.44776	0.032783	0.0196742	0.000201354	9.5575	2.99	2.09167	0.505119	0.0588343	0.839287	0.834276	8.47294	1.08456
0.44892	0.032197	0.0198887	0.000201354	9.66259	2.99	2.09167	-0.505119	0.0596068	0.665984	0.841067	8.5692	1.09339
0.45008	0.0317576	0.0200916	0.000201354	9.76203	2.99	2.09167	-0.378839	0.0606338	0.885282	0.84808	8.65952	1.1025
0.45124	0.031904	0.0202867	0.000188687	9.86282	2.99	2.09167	0.12628	0.0618587	1.05594	0.855045	8.75126	1.11156
0.4524	0.031904	0.0204772	0.000173379	9.9625	2.99	2.09167	0	0.0630545	1.03092	0.861756	8.84222	1.12028
0.45356	0.031904	0.0206653	0.000161471	10.0596	2.99	2.09167	0	0.0642788	1.05541	0.868251	8.93084	1.12873
0.45472	0.0323435	0.0208582	0.000157357	10.1558	2.99	2.09167	0.378839	0.065532	1.08037	0.874509	9.0189	1.13686
0.45588	0.0320505	0.0210587	0.000163784	10.2513	2.99	2.09167	-0.252559	0.0666441	0.958705	0.880506	9.10668	1.14466
0.45704	0.032197	0.0212552	0.000167283	10.3462	2.99	2.09167	0.12628	0.0679	1.08266	0.886404	9.19391	1.15232
0.4582	0.03249	0.0214387	0.000159057	10.4395	2.99	2.09167	0.252559	0.0691296	1.05999	0.892052	9.27985	1.15967
0.45936	0.0320505	0.0216163	0.000145702	10.532	2.99	2.09167	-0.378839	0.0702766	0.98876	0.897487	9.36529	1.16673
0.46052	0.032783	0.0217916	0.000134635	10.6225	2.99	2.09167	0.631398	0.0716258	1.16316	0.902807	9.44885	1.17365
0.46168	0.0320505	0.02197	0.00013135	10.7113	2.99	2.09167	-0.631398	0.072723	0.945789	0.907795	9.53113	1.18013
0.46284	0.0364451	0.0221554	0.000138319	10.7992	2.99	2.09167	3.78839	0.0741373	1.21922	0.912736	9.61269	1.18656
0.464	0.0323435	0.0223377	0.000143448	10.8865	2.99	2.09167	-3.53583	0.0738784	-0.223127	0.917288	9.69399	1.19247
0.46516	0.0316111	0.0225069	0.000135468	10.9726	2.99	2.09167	-0.631398	0.0752456	1.17862	0.923287	9.77235	1.20027
0.46632	0.0329294	0.0226684	0.000120697	11.0578	2.99	2.09167	1.13652	0.0769311	1.45303	0.928962	9.85019	1.20765
0.46748	0.0329294	0.0228281	0.000106829	11.1418	2.99	2.09167	0	0.0781394	1.04156	0.933972	9.92766	1.21416
0.46864	0.0320505	0.0229878	9.8805e-05	11.2234	2.99	2.09167	-0.757678	0.0793828	1.07191	0.938845	10.0029	1.2205
0.4698	0.0329294	0.0231536	0.000100196	11.304	2.99	2.09167	0.757678	0.0810033	1.39696	0.943549	10.0774	1.22661
0.47096	0.032783	0.0233289	0.000113477	11.3844	2.99	2.09167	-0.12628	0.0823189	1.13419	0.947678	10.1525	1.23198
0.47212	0.0339548	0.0234892	0.000113361	11.463	2.99	2.09167	1.01024	0.0837285	1.21519	0.95157	10.226	1.23704
0.47328	0.0332224	0.0236409	0.000105619	11.5406	2.99	2.09167	-0.631398	0.0847208	0.855406	0.955127	10.2989	1.24167
0.47444	0.0393748	0.0237914	9.71229e-05	11.6178	2.99	2.09167	5.30374	0.0860357	1.13349	0.958811	10.3713	1.24645
0.4756	0.0333689	0.0239403	9.28172e-05	11.6925	2.99	2.09167	-5.17746	0.0850001	-0.892684	0.962273	10.4416	1.25096
0.47676	0.0338083	0.0240943	9.70992e-05	11.7663	2.99	2.09167	0.378839	0.0863352	1.15088	0.96809	10.5077	1.25852
0.47792	0.032783	0.0242563	0.00011272	11.8392	2.99	2.09167	-0.883957	0.0875384	1.03729	0.973675	10.5734	1.26578
0.47908	0.0335154	0.024404	0.000115217	11.9106	2.99	2.09167	0.631398	0.0891793	1.41455	0.979179	10.6376	1.27293
0.48024	0.0335154	0.0245373	0.000104592	11.9803	2.99	2.09167	0	0.0905759	1.20399	0.984131	10.7009	1.27937
0.4814	0.0336619	0.0246681	9.18366e-05	12.0496	2.99	2.09167	0.12628	0.0920133	1.23916	0.988803	10.7641	1.28544
0.48256	0.0338083	0.0247979	8.21699e-05	12.1172	2.99	2.09167	0.12628	0.0934353	1.22585	0.993158	10.8261	1.29111
0.48372	0.0338083	0.0249303	8.02611e-05	12.1828	2.99	2.09167	0	0.0948425	1.2131	0.997217	10.8864	1.29638
0.48488	0.0341013	0.0250699	8.91336e-05	12.2476	2.99	2.09167	0.252559	0.0962925	1.24993	1.001	10.9463	1.3013
0.48604	0.0341013	0.0252093	9.00958e-05	12.3155	2.99	2.09167	0	0.097672	1.18925	1.00447	11.0097	1.30581
0.4872	0.0342478	0.025335	7.76492e-05	12.3822	2.99	2.09167	0.12628	0.0990955	1.22718	1.00771	11.0722	1.31002
0.48836	0.0342478	0.0254556	6.11361e-05	12.4481	2.99	2.09167	0	0.100507	1.21662	1.01066	11.1342	1.31386
0.48952	0.0345408	0.0255758	4.6048e-05	12.5132	2.99	2.09167	0.252559	0.101963	1.25565	1.01336	11.1958	1.31736
0.49068	0.0345408	0.0256977	3.76017e-05	12.5764	2.99	2.09167	0	0.103352	1.19717	1.01574	11.2559	1.32047
0.49184	0.0351267	0.0258261	3.90928e-05	12.6387	2.99	2.09167	0.505119	0.104787	1.2373	1.0179	11.3154	1.32327
0.493	0.0355662	0.0259635	4.69478e-05	12.7028	2.99	2.09167	0.378839	0.106042	1.08184	1.01978	11.3771	1.32571
0.49416	0.0368845	0.0260869	4.10996e-05	12.7657	2.99	2.09167	1.13652	0.107174	0.975909	1.02158	11.4376	1.32805
0.49532	0.0364451	0.026202	3.00687e-05	12.8266	2.99	2.09167	-0.378839	0.107843	0.576187	1.02343	11.4962	1.33046
0.49648	0.0351267	0.0263168	1.87991e-05	12.8875	2.99	2.09167	-1.13652	0.10873	0.765179	1.02586	11.5539	1.33362
0.49764	0.0354197	0.0264308	1.25095e-05	12.946	2.99	2.09167	0.252559	0.110179	1.24874	1.02862	11.6088	1.3372
0.4988	0.0352732	0.0265514	1.58711e-05	13.0037	2.99	2.09167	-0.12628	0.111563	1.19345	1.03109	11.6632	1.34042
0.49996	0.0355662	0.0266808	3.10848e-05	13.0608	2.99	2.09167	0.252559	0.113055	1.28581	1.03336	11.7174	1.34337
0.50112	0.0355662	0.0267962	3.31381e-05	13.1165	2.99	2.09167	0	0.114483	1.23164	1.03531	11.7706	1.34591
0.50228	0.0358591	0.0268977	2.17569e-05	13.1709	2.99	2.09167	0.252559	0.115964	1.2761	1.03701	11.8228	1.34812
0.50344	0.0357126	0.0269979	9.30851e-06	13.2251	2.99	2.09167	-0.12628	0.117383	1.22305	1.03841	11.8752	1.34993
0.5046	0.036738	0.0270981	1.56087e-06	13.2774	2.99	2.09167	0.883957	0.118911	1.31767	1.03957	11.926	1.35144
0.50576	0.0352732	0.027202	2.63462e-06	13.3279	2.99	2.09167	-1.2628	0.120095	1.02059	1.04038	11.9754	1.3525
0.50692	0.0364451	0.0273145	1.50047e-05	13.3779	2.99	2.09167	1.01024	0.121902	1.5576	1.04122	12.0243	1.35358
0.50808	0.0374705	0.0274254	2.24553e-05	13.4292	2.99	2.09167	0.883957	0.123308	1.21263	1.0414	12.0754	1.35382
0.50924	0.037031	0.0275224	1.64666e-05	13.4792	2.99	2.09167	-0.378839	0.124372	0.917254	1.04136	12.1254	1.35377
0.5104	0.037031	0.0276165	8.3085e-06	13.5286	2.99	2.09167	0	0.125663	1.11266	1.04148	12.1747	1.35392
0.51156	0.0371775	0.0277113	2.37629e-06	13.5776	2.99	2.09167	0.12628	0.12701	1.16146	1.04151	12.2236	1.35396
0.51272	0.0374705	0.0278075	3.6162e-06	13.6242	2.99	2.09167	0.252559	0.128358	1.16175	1.04138	12.2704	1.3538
0.51388	0.0371775	0.0279111	1.5603e-05	13.67	2.99	2.09167	-0.252559	0.12965	1.11352	1.04111	12.3166	1.35344
0.51504	0.0376169	0.0280136	2.87192e-05	13.7149	2.99	2.09167	0.378839	0.131114	1.26194	1.04074	12.3619	1.35296
0.5162	0.0377634	0.0281025	2.83991e-05	13.7585	2.99	2.09167	0.12628	0.132466	1.16574	1.04009	12.4064	1.35212
0.51736	0.0379099	0.028186	2.42652e-05	13.8012	2.99	2.09167	0.12628	0.133821	1.16814	1.03928	12.4501	1.35107
0.51852	0.0380564	0.0282706	2.12646e-05	13.8438	2.99	2.09167	0.12628	0.135179	1.17107	1.03831	12.494	1.34981
0.51968	0.0382029	0.0283559	2.43449e-05	13.8844	2.99	2.09167	0.12628	0.136542	1.17453	1.03717	12.536	1.34832
0.52084	0.0383494	0.028448	3.73567e-05	13.9241	2.99	2.09167	0.12628	0.137909	1.17851	1.03586	12.5775	1.34662
0.522	0.0387888	0.0285382	5.12327e-05	13.9626	2.99	2.09167	0.378839	0.139281	1.18303	1.03436	12.618	1.34467
0.52316	0.0382029	0.0286161	5.27822e-05	14.0002	2.99	2.09167	-0.505119	0.140545	1.09	1.03268	12.6577	1.34248
0.52432	0.0389353	0.0286842	4.44803e-05	14.037	2.99	2.09167	0.631398	0.142101	1.34073	1.03092	12.6968	1.3402
0.52548	0.0396677	0.0287519	3.62211e-05	14.0735	2.99	2.09167	0.631398	0.143436	1.15072	1.02877	12.7361	1.3374
0.52664	0.0392283	0.0288211	3.26749e-05	14.1089	2.99	2.09167	-0.378839	0.144551	0.961233	1.02647	12.7745	1.33441
0.5278	0.0396677	0.0288938	3.82389e-05	14.1422	2.99	2.09167	0.378839	0.145901	1.16448	1.02424	12.8107	1.33152
0.52896	0.0398142	0.0289686	4.63173e-05	14.1756	2.99	2.09167	0.12628	0.147147	1.07402	1.02184	12.8472	1.3284
0.53012	0.0405466	0.0290429	5.52641e-05	14.2083	2.99	2.09167	0.631398	0.148403	1.08213	1.01938	12.8831	1.32519
0.53128	0.0398142	0.0291067	5.43605e-05	14.2399	2.99	2.09167	-0.631398	0.14944	0.894566	1.01683	12.918	1.32188
0.53244	0.0406931	0.0291689	5.21294e-05	14.2713	2.99	2.09167	0.757678	0.15083	1.19779	1.01444	12.9525	1.31877
0.5336	0.0408396	0.0292328	5.35187e-05	14.3021	2.99	2.09167	0.12628	0.151946	0.962132	1.01182	12.9867	1.31536
0.53476	0.0404001	0.0292982	6.32028e-05	14.3301	2.99	2.09167	-0.378839	0.153073	0.972098	1.00925	13.0181	1.31203
0.53592	0.0405466	0.0293717	7.98116e-05	14.3593	2.99	2.09167	0.12628	0.154441	1.17865	1.00674	13.0505	1.30876
0.53708	0.0396677	0.029444	9.64789e-05	14.3878	2.99	2.09167	-0.757678	0.155821	1.18959	1.00401	13.0826	1.30521
0.53824	0.0424509	0.0295032	0.00010029	14.4153	2.99	2.09167	2.39931	0.157612	1.54433	1.00104	13.1139	1.30135
0.5394	0.0411326	0.0295586	0.000101695	14.4418	2.99	2.09167	-1.13652	0.158394	0.673813	0.997385	13.1452	1.2966
0.54056	0.0399607	0.0296163	0.000105368	14.4687	2.99	2.09167	-1.01024	0.159759	1.17666	0.994138	13.1763	1.29238
0.54172	0.0417185	0.029675	0.000115709	14.4931	2.99	2.09167	1.51536	0.16165	1.631	0.99066	13.2053	1.28786
0.54288	0.0420115	0.0297405	0.000136573	14.5166	2.99	2.09167	0.252559	0.162933	1.10532	0.98637	13.2343	1.28228
0.54404	0.0420115	0.0298033	0.00015807	14.5385	2.99	2.09167	0	0.164174	1.07052	0.981928	13.262	1.27651
0.5452	0.041572	0.0298527	0.000166465	14.5593	2.99	2.09167	-0.378839	0.16549	1.13427	0.977373	13.2887	1.27059
0.54636	0.0430369	0.029895	0.000166159	14.5802	2.99	2.09167	1.2628	0.167051	1.34565	0.97262	13.3158	1.26441
0.54752	0.0425974	0.0299394	0.000172	14.5995	2.99	2.09167	-0.378839	0.168119	0.920141	0.967393	13.3419	1.25761
0.54868	0.0433298	0.0299889	0.000187288	14.6175	2.99	2.09167	0.631398	0.169432	1.13254	0.962226	13.3666	1.25089
0.54984	0.0434763	0.030036	0.000203233	14.634	2.99	2.09167	0.12628	0.170538	0.953146	0.956842	13.3901	1.2439
0.551	0.0437693	0.0300721	0.000209395	14.6492	2.99	2.09167	0.252559	0.171663	0.970333	0.951464	13.4123	1.2369
0.55216	0.0439158	0.0301059	0.000213749	14.6639	2.99	2.09167	0.12628	0.172753	0.938918	0.946061	13.4341	1.22988
0.55332	0.0439158	0.0301432	0.000221521	14.679	2.99	2.09167	0	0.173863	0.956966	0.940668	13.4562	1.22287
0.55448	0.0446482	0.0301827	0.000237114	14.6919	2.99	2.09167	0.631398	0.175051	1.02448	0.935254	13.4761	1.21583
0.55564	0.0411326	0.0302191	0.000252287	14.7035	2.99	2.09167	-3.03071	0.176034	0.847269	0.929726	13.4949	1.20864
0.5568	0.0446482	0.0302536	0.000268145	14.7139	2.99	2.09167	3.03071	0.178461	2.09254	0.924304	13.5123	1.20159
0.55796	0.0450876	0.0302787	0.000274799	14.7235	2.99	2.09167	0.378839	0.179604	0.984929	0.917398	13.5309	1.19262
0.55912	0.0453806	0.030297	0.000273902	14.7328	2.99	2.09167	0.252559	0.180657	0.90756	0.910406	13.5493	1.18353
0.56028	0.0453806	0.0303183	0.000275075	14.7428	2.99	2.09167	0	0.181677	0.879639	0.903419	13.5683	1.17444
0.56144	0.0456736	0.0303427	0.000282718	14.7516	2.99	2.09167	0.252559	0.182779	0.950189	0.896461	13.5862	1.1654
0.5626	0.0462595	0.0303674	0.000291611	14.76	2.99	2.09167	0.505119	0.18385	0.923091	0.889435	13.6037	1.15627
0.56376	0.0437693	0.0303894	0.000300933	14.767	2.99	2.09167	-2.14675	0.184776	0.798334	0.882366	13.6199	1.14708
0.56492	0.0468455	0.0304037	0.00030024	14.7743	2.99	2.09167	2.65187	0.186752	1.70373	0.875405	13.6363	1.13803
0.56608	0.0446482	0.0304119	0.000291182	14.782	2.99	2.09167	-1.89419	0.187618	0.746457	0.867391	13.6544	1.12761
0.56724	0.046406	0.0304234	0.000282278	14.7913	2.99	2.09167	1.51536	0.189422	1.55488	0.859531	13.6739	1.11739
0.5684	0.0465525	0.0304393	0.000279572	14.8002	2.99	2.09167	0.12628	0.190628	1.03999	0.850789	13.6942	1.10603
0.56956	0.0477244	0.0304557	0.00027729	14.8092	2.99	2.09167	1.01024	0.191864	1.06497	0.841806	13.7148	1.09435
0.57072	0.0472849	0.0304699	0.00027543	14.8169	2.99	2.09167	-0.378839	0.19273	0.747178	0.83254	13.7346	1.0823
0.57188	0.0478708	0.0304787	0.000266019	14.8251	2.99	2.09167	0.505119	0.193855	0.969134	0.823382	13.7547	1.0704
0.57304	0.0481638	0.0304814	0.000249327	14.8333	2.99	2.09167	0.252559	0.194839	0.848261	0.814039	13.775	1.05825
0.5742	0.0518259	0.0304877	0.000235245	14.8421	2.99	2.09167	3.15699	0.195797	0.825847	0.804653	13.7961	1.04605
0.57536	0.0486033	0.0304982	0.000227889	14.8503	2.99	2.09167	-2.77815	0.195421	-0.324066	0.79524	13.8165	1.03381
0.57652	0.0490427	0.0305036	0.000219284	14.8565	2.99	2.09167	0.378839	0.196384	0.830653	0.787248	13.8331	1.02342
0.57768	0.0491892	0.0305072	0.00021135	14.8616	2.99	2.09167	0.12628	0.197266	0.759801	0.779201	13.8486	1.01296
0.57884	0.0493357	0.0305151	0.000208209	14.8667	2.99	2.09167	0.12628	0.198179	0.787367	0.771178	13.8642	1.00253
0.58	0.0497751	0.0305167	0.00019776	14.8718	2.99	2.09167	0.378839	0.199125	0.815288	0.763135	13.8797	0.992075
0.58116	0.0497751	0.0305204	0.000188523	14.8774	2.99	2.09167	0	0.199989	0.745499	0.755025	13.8959	0.981533
0.58232	0.0500681	0.03053	0.000184892	14.8836	2.99	2.09167	0.252559	0.200944	0.823161	0.746928	13.9126	0.971006
0.58348	0.05124	0.0305359	0.000180267	14.8884	2.99	2.09167	1.01024	0.201876	0.803117	0.738734	13.9281	0.960354
0.58464	0.0508005	0.0305386	0.000176296	14.8914	2.99	2.09167	-0.378839	0.202443	0.489209	0.730458	13.9418	0.949595
0.5858	0.0505076	0.030545	0.000177101	14.8942	2.99	2.09167	-0.252559	0.203273	0.714936	0.722488	13.955	0.939235
0.58696	0.05124	0.0305458	0.00017031	14.8974	2.99	2.09167	0.631398	0.204307	0.891948	0.714528	13.9685	0.928887
0.58812	0.0510935	0.0305492	0.000164719	14.9013	2.99	2.09167	-0.12628	0.20515	0.726098	0.706343	13.9831	0.918246
0.58928	0.0532908	0.0305588	0.000164723	14.906	2.99	2.09167	1.89419	0.206141	0.8548	0.698133	13.9985	0.907573
0.59044	0.0519724	0.0305608	0.000162624	14.9079	2.99	2.09167	-1.13652	0.206372	0.199284	0.689724	14.0112	0.896641
0.5916	0.0525583	0.03056	0.000160071	14.9085	2.99	2.09167	0.505119	0.207208	0.720764	0.681937	14.022	0.886518
0.59276	0.0524119	0.0305634	0.000162837	14.909	2.99	2.09167	-0.12628	0.20791	0.605078	0.674101	14.0327	0.876332
0.59392	0.0524119	0.0305614	0.00015855	14.9098	2.99	2.09167	0	0.208763	0.734853	0.666353	14.0436	0.866259
0.59508	0.0529978	0.0305613	0.000154358	14.9115	2.99	2.09167	0.505119	0.209709	0.815921	0.658518	14.0554	0.856073
0.59624	0.0532908	0.0305676	0.000155481	14.9141	2.99	2.09167	0.252559	0.210523	0.701205	0.650483	14.0685	0.845628
0.5974	0.0540232	0.030566	0.000154223	14.9139	2.99	2.09167	0.631398	0.211317	0.684881	0.642383	14.0788	0.835098
0.59856	0.0540232	0.0305616	0.000152782	14.9123	2.99	2.09167	0	0.211922	0.521753	0.63423	14.0878	0.824499
0.59972	0.0565134	0.0305615	0.000156382	14.9108	2.99	2.09167	2.14675	0.212623	0.604047	0.626219	14.0967	0.814085
0.60088	0.0546091	0.030556	0.000152926	14.9095	2.99	2.09167	-1.64164	0.212452	-0.147028	0.618237	14.1058	0.803708
0.60204	0.0546091	0.0305518	0.000149561	14.9088	2.99	2.09167	0	0.213117	0.572965	0.611226	14.1142	0.794594
0.6032	0.0547556	0.030554	0.000150411	14.9096	2.99	2.09167	0.12628	0.213878	0.655724	0.604264	14.124	0.785543
0.60436	0.0556345	0.0305484	0.000148326	14.9077	2.99	2.09167	0.757678	0.214678	0.689741	0.597236	14.1313	0.776407
0.60552	0.0551951	0.0305401	0.000146057	14.9046	2.99	2.09167	-0.378839	0.215233	0.478879	0.590091	14.1375	0.767118
0.60668	0.0568064	0.0305348	0.000148274	14.901	2.99	2.09167	1.38908	0.216056	0.709573	0.583087	14.143	0.758013
0.60784	0.056074	0.0305252	0.000143983	14.8981	2.99	2.09167	-0.631398	0.216351	0.254058	0.575922	14.1494	0.748699
0.609	0.0563669	0.0305121	0.00013428	14.8957	2.99	2.09167	0.252559	0.217028	0.583262	0.569166	14.1558	0.739916
0.61016	0.0566599	0.0305047	0.00012796	14.8946	2.99	2.09167	0.252559	0.217688	0.569465	0.562392	14.1635	0.73111
0.61132	0.056074	0.0304943	0.000118696	14.8934	2.99	2.09167	-0.505119	0.218333	0.555922	0.555609	14.1711	0.722292
0.61248	0.0598826	0.0304778	0.000107858	14.8897	2.99	2.09167	3.28327	0.219304	0.836859	0.548826	14.1762	0.713474
0.61364	0.056074	0.0304627	0.000100665	14.8853	2.99	2.09167	-3.28327	0.218895	-0.352963	0.541677	14.1811	0.70418
0.6148	0.0566599	0.030454	0.00010014	14.8813	2.99	2.09167	0.505119	0.220063	1.00702	0.535664	14.1849	0.696363
0.61596	0.0581248	0.0304419	9.39077e-05	14.8779	2.99	2.09167	1.2628	0.221102	0.896328	0.529053	14.1901	0.687768
0.61712	0.0576853	0.0304339	8.99403e-05	14.8756	2.99	2.09167	-0.378839	0.221673	0.49181	0.521975	14.1971	0.678567
0.61828	0.0587107	0.0304332	8.98852e-05	14.8753	2.99	2.09167	0.883957	0.222514	0.725006	0.514935	14.2059	0.669416
0.61944	0.0588572	0.0304244	8.74189e-05	14.872	2.99	2.09167	0.12628	0.223057	0.468148	0.507629	14.2121	0.659918
0.6206	0.0590037	0.0304131	8.44646e-05	14.8677	2.99	2.09167	0.12628	0.223644	0.505731	0.500373	14.2172	0.650485
0.62176	0.0594431	0.0304077	8.78947e-05	14.8636	2.99	2.09167	0.378839	0.224274	0.543539	0.49311	14.2226	0.641043
0.62292	0.0597361	0.0303983	8.53383e-05	14.86	2.99	2.09167	0.252559	0.224835	0.483518	0.485783	14.2285	0.631518
0.62408	0.0614939	0.0303867	8.09185e-05	14.8562	2.99	2.09167	1.51536	0.225383	0.472751	0.478459	14.2342	0.621997
0.62524	0.0590037	0.030381	8.20565e-05	14.8529	2.99	2.09167	-2.14675	0.225351	-0.0281793	0.471143	14.2404	0.612485
0.6264	0.0604685	0.0303692	7.99548e-05	14.848	2.99	2.09167	1.2628	0.226387	0.892972	0.46446	14.2442	0.603798
0.62756	0.0617869	0.0303537	7.68121e-05	14.8417	2.99	2.09167	1.13652	0.226956	0.490507	0.457233	14.2473	0.594403
0.62872	0.0595896	0.0303418	7.92254e-05	14.8349	2.99	2.09167	-1.89419	0.227115	0.1373	0.449964	14.2499	0.584953
0.62988	0.0614939	0.0303387	8.00474e-05	14.833	2.99	2.09167	1.64164	0.22823	0.961061	0.443092	14.257	0.576019
0.63104	0.0617869	0.0303333	7.62541e-05	14.8319	2.99	2.09167	0.252559	0.228708	0.412197	0.435562	14.2657	0.56623
0.6322	0.0620798	0.0303333	7.6367e-05	14.8319	2.99	2.09167	0.252559	0.229175	0.402936	0.428062	14.2754	0.55648
0.63336	0.0620798	0.0303282	7.1863e-05	14.8312	2.99	2.09167	0	0.229632	0.393854	0.420594	14.2845	0.546772
0.63452	0.0631052	0.0303157	6.52145e-05	14.8278	2.99	2.09167	0.883957	0.230192	0.483028	0.413159	14.2907	0.537107
0.63568	0.0629587	0.0303056	6.38418e-05	14.8235	2.99	2.09167	-0.12628	0.230458	0.229153	0.405636	14.2962	0.527327
0.63684	0.0629587	0.0303033	7.10437e-05	14.8194	2.99	2.09167	0	0.230885	0.367684	0.398338	14.3016	0.517839
0.638	0.0638376	0.0302978	7.33512e-05	14.8157	2.99	2.09167	0.757678	0.231415	0.457342	0.391078	14.3073	0.508401
0.63916	0.0636912	0.0302964	7.7914e-05	14.8132	2.99	2.09167	-0.12628	0.231709	0.25298	0.383733	14.3143	0.498854
0.64032	0.0639841	0.0302911	7.67609e-05	14.8111	2.99	2.09167	0.252559	0.232163	0.391997	0.376555	14.3215	0.489522
0.64148	0.0642771	0.0302766	7.26406e-05	14.8056	2.99	2.09167	0.252559	0.232609	0.384077	0.369358	14.3255	0.480165
0.64264	0.0644236	0.0302628	7.21499e-05	14.7991	2.99	2.09167	0.12628	0.233045	0.376329	0.362141	14.3283	0.470784
0.6438	0.064863	0.0302546	7.83128e-05	14.7925	2.99	2.09167	0.378839	0.23353	0.41779	0.354907	14.3312	0.461379
0.64496	0.0650095	0.0302434	7.90349e-05	14.7867	2.99	2.09167	0.12628	0.233949	0.361362	0.347593	14.3349	0.45187
0.64612	0.0685251	0.0302305	7.62411e-05	14.7816	2.99	2.09167	3.03071	0.234417	0.403173	0.340261	14.3392	0.442339
0.64728	0.0655955	0.030216	6.80055e-05	14.7778	2.99	2.09167	-2.52559	0.233625	-0.682704	0.332849	14.3451	0.432704
0.64844	0.0660349	0.0301942	5.54241e-05	14.7724	2.99	2.09167	0.378839	0.234076	0.388775	0.326727	14.3476	0.424745
0.6496	0.0664744	0.0301698	4.454e-05	14.7649	2.99	2.09167	0.378839	0.234462	0.33256	0.320526	14.3482	0.416684
0.65076	0.0667673	0.0301494	3.97472e-05	14.7568	2.99	2.09167	0.252559	0.234783	0.276495	0.314309	14.3482	0.408602
0.65192	0.0672068	0.0301383	4.35181e-05	14.7499	2.99	2.09167	0.378839	0.235095	0.269591	0.308141	14.3493	0.400583
0.65308	0.0677927	0.0301261	4.34821e-05	14.7439	2.99	2.09167	0.505119	0.235343	0.213772	0.302021	14.3513	0.392628
0.65424	0.0717478	0.0301193	4.67876e-05	14.7392	2.99	2.09167	3.40955	0.23547	0.10901	0.296014	14.3544	0.384818
0.6554	0.0710154	0.0301078	4.4913e-05	14.7343	2.99	2.09167	-0.631398	0.234166	-1.12357	0.290244	14.357	0.377317
0.65656	0.0680857	0.0300891	4.06068e-05	14.7269	2.99	2.09167	-2.52559	0.233253	-0.787449	0.286269	14.3548	0.372149
0.65772	0.0683787	0.0300736	4.15654e-05	14.7189	2.99	2.09167	0.252559	0.233582	0.283886	0.283656	14.3502	0.368753
0.65888	0.0691111	0.0300662	5.05386e-05	14.7117	2.99	2.09167	0.631398	0.233903	0.276516	0.281044	14.3463	0.365357
0.66004	0.0691111	0.0300569	5.51582e-05	14.7052	2.99	2.09167	0	0.234045	0.122158	0.278437	14.3432	0.361968
0.6612	0.0692576	0.03005	6.11999e-05	14.6993	2.99	2.09167	0.12628	0.234292	0.213045	0.276028	14.3405	0.358837
0.66236	0.0692576	0.0300394	6.12432e-05	14.6941	2.99	2.09167	0	0.234588	0.254988	0.2737	14.3383	0.35581
0.66352	0.0701365	0.0300196	5.80375e-05	14.6857	2.99	2.09167	0.757678	0.234989	0.346085	0.271395	14.3329	0.352813
0.66468	0.0701365	0.0300014	5.90047e-05	14.6764	2.99	2.09167	0	0.235155	0.14311	0.268995	14.3267	0.349694
0.66584	0.0705759	0.0299894	6.77193e-05	14.6669	2.99	2.09167	0.378839	0.235427	0.234428	0.266756	14.3201	0.346782
0.667	0.0667673	0.0299778	7.31879e-05	14.659	2.99	2.09167	-3.28327	0.235634	0.178737	0.264557	14.3151	0.343924
0.66816	0.0711619	0.0299667	7.54128e-05	14.6526	2.99	2.09167	3.78839	0.237427	1.54522	0.262467	14.3114	0.341207
0.66932	0.0711619	0.0299513	7.08209e-05	14.647	2.99	2.09167	0	0.23762	0.166288	0.258749	14.3106	0.336373
0.67048	0.0716013	0.0299292	6.18844e-05	14.6398	2.99	2.09167	0.378839	0.23792	0.258563	0.255148	14.3081	0.331692
0.67164	0.0717478	0.0299064	5.62978e-05	14.6309	2.99	2.09167	0.12628	0.238156	0.20384	0.251543	14.3039	0.327006
0.6728	0.0721873	0.0298889	5.76327e-05	14.6218	2.99	2.09167	0.378839	0.238443	0.247284	0.247998	14.2994	0.322398
0.67396	0.0726267	0.029882	6.8639e-05	14.6139	2.99	2.09167	0.378839	0.238667	0.192765	0.244454	14.2961	0.317791
0.67512	0.0733591	0.0298752	7.61246e-05	14.6075	2.99	2.09167	0.631398	0.238827	0.138332	0.240976	14.2943	0.313269
0.67628	0.0733591	0.0298633	7.59689e-05	14.6018	2.99	2.09167	0	0.238811	-0.0141138	0.237629	14.2928	0.308917
0.67744	0.0733591	0.0298466	7.06463e-05	14.5957	2.99	2.09167	0	0.238902	0.0786233	0.2346	14.2908	0.304981
0.6786	0.0733591	0.0298261	6.73027e-05	14.5871	2.99	2.09167	0	0.239101	0.171395	0.23177	14.2858	0.301301
0.67976	0.074238	0.0298103	6.97858e-05	14.5783	2.99	2.09167	0.757678	0.239407	0.264244	0.229017	14.2806	0.297722
0.68092	0.0743845	0.0298034	8.13959e-05	14.5702	2.99	2.09167	0.12628	0.23948	0.0629853	0.226218	14.2761	0.294084
0.68208	0.074824	0.0297956	8.94911e-05	14.563	2.99	2.09167	0.378839	0.239604	0.106944	0.223627	14.2723	0.290716
0.68324	0.074238	0.0297798	8.85763e-05	14.5556	2.99	2.09167	-0.505119	0.239666	0.0528759	0.221184	14.2681	0.28754
0.6844	0.0752634	0.0297607	8.19504e-05	14.549	2.99	2.09167	0.883957	0.240062	0.342096	0.218955	14.2644	0.284642
0.68556	0.0727732	0.0297357	7.56589e-05	14.5394	2.99	2.09167	-2.14675	0.240169	0.0920543	0.216569	14.2578	0.28154
0.68672	0.0710154	0.0297135	7.43731e-05	14.529	2.99	2.09167	-1.51536	0.241351	1.01896	0.214342	14.2504	0.278645
0.68788	0.074531	0.0296982	8.16665e-05	14.5185	2.99	2.09167	3.03071	0.243325	1.70114	0.211093	14.2441	0.274421
0.68904	0.0767283	0.0296854	8.73698e-05	14.5099	2.99	2.09167	1.89419	0.244042	0.61872	0.205953	14.2422	0.267738
0.6902	0.0768748	0.0296663	8.15876e-05	14.5029	2.99	2.09167	0.12628	0.244017	-0.0220793	0.200288	14.2425	0.260375
0.69136	0.0767283	0.0296425	6.92662e-05	14.4963	2.99	2.09167	-0.12628	0.244044	0.0236414	0.194906	14.243	0.253378
0.69252	0.0773142	0.0296133	5.47992e-05	14.4879	2.99	2.09167	0.505119	0.244238	0.167448	0.189741	14.2413	0.246664
0.69368	0.0776072	0.0295829	4.39538e-05	14.4775	2.99	2.09167	0.252559	0.244315	0.0661414	0.184605	14.2375	0.239986
0.69484	0.0781931	0.0295583	4.08491e-05	14.4667	2.99	2.09167	0.505119	0.244388	0.0629397	0.179619	14.2332	0.233504
0.696	0.0799509	0.0295446	4.8508e-05	14.4569	2.99	2.09167	1.51536	0.244344	-0.0383086	0.174781	14.2297	0.227215
0.69716	0.074824	0.0295306	4.74134e-05	14.4505	2.99	2.09167	-4.41979	0.243727	-0.531878	0.170213	14.2292	0.221277
0.69832	0.0737986	0.029512	3.92144e-05	14.4447	2.99	2.09167	-0.883957	0.24521	1.27909	0.166537	14.2282	0.216498
0.69948	0.0792185	0.0294896	2.91311e-05	14.4379	2.99	2.09167	4.67235	0.247203	1.71758	0.161449	14.228	0.209883
0.70064	0.079365	0.029465	2.23828e-05	14.4287	2.99	2.09167	0.12628	0.247202	-0.000825862	0.154385	14.228	0.2007
0.7018	0.0799509	0.0294459	2.30907e-05	14.419	2.99	2.09167	0.505119	0.247255	0.0461328	0.147518	14.2272	0.191773
0.70296	0.0808298	0.0294368	3.42792e-05	14.4099	2.99	2.09167	0.757678	0.247193	-0.0540034	0.14078	14.2269	0.183013
0.70412	0.0800974	0.0294271	4.22066e-05	14.4019	2.99	2.09167	-0.631398	0.2469	-0.252239	0.134289	14.2273	0.174575
0.70528	0.0806833	0.029411	4.22024e-05	14.394	2.99	2.09167	0.505119	0.247003	0.0888284	0.128288	14.2272	0.166775
0.70644	0.0809763	0.0293906	3.78408e-05	14.3858	2.99	2.09167	0.252559	0.24699	-0.0114043	0.122338	14.2268	0.15904
0.7076	0.0817087	0.0293668	3.59934e-05	14.3749	2.99	2.09167	0.631398	0.246974	-0.0135672	0.116558	14.2234	0.151525
0.70876	0.0815623	0.0293482	4.16082e-05	14.3635	2.99	2.09167	-0.12628	0.246785	-0.16285	0.110943	14.2193	0.144226
0.70992	0.0817087	0.0293385	5.74371e-05	14.3522	2.99	2.09167	0.12628	0.246764	-0.0179784	0.105675	14.2148	0.137378
0.71108	0.0820017	0.0293278	7.02902e-05	14.3417	2.99	2.09167	0.252559	0.246798	0.0288095	0.100564	14.211	0.130734
0.71224	0.0825876	0.0293054	6.97256e-05	14.331	2.99	2.09167	0.505119	0.246829	0.0265716	0.0955449	14.2068	0.124208
0.7134	0.0821482	0.0292785	6.26166e-05	14.3207	2.99	2.09167	-0.378839	0.246743	-0.0737293	0.0906129	14.2029	0.117797
0.71456	0.0815623	0.0292487	5.66581e-05	14.3086	2.99	2.09167	-0.505119	0.246939	0.169201	0.0858895	14.1969	0.111656
0.71572	0.0831736	0.0292215	5.62466e-05	14.2954	2.99	2.09167	1.38908	0.247474	0.461247	0.0810603	14.19	0.105378
0.71688	0.083613	0.0292015	6.5231e-05	14.2819	2.99	2.09167	0.378839	0.247495	0.017931	0.0757486	14.1834	0.0984731
0.71804	0.083906	0.0291937	8.5265e-05	14.2698	2.99	2.09167	0.252559	0.247457	-0.0330741	0.0705102	14.1781	0.0916632
0.7192	0.084199	0.0291749	9.16131e-05	14.258	2.99	2.09167	0.252559	0.247416	-0.0350543	0.0654033	14.173	0.0850243
0.72036	0.0844919	0.0291507	9.08767e-05	14.2465	2.99	2.09167	0.252559	0.247373	-0.0370526	0.0604239	14.1679	0.0785511
0.72152	0.0849314	0.0291261	8.9654e-05	14.2349	2.99	2.09167	0.378839	0.247328	-0.0390655	0.0555683	14.1626	0.0722388
0.72268	0.0852244	0.0291003	9.26184e-05	14.2211	2.99	2.09167	0.252559	0.247223	-0.0901353	0.0508328	14.155	0.0660827
0.72384	0.0874216	0.0290812	0.000104445	14.2068	2.99	2.09167	1.89419	0.247116	-0.0922069	0.0462763	14.1467	0.0601592
0.725	0.0856638	0.0290726	0.000127339	14.1932	2.99	2.09167	-1.51536	0.246267	-0.731813	0.0418955	14.1387	0.0544642
0.72616	0.0856638	0.029053	0.000136566	14.1798	2.99	2.09167	0	0.246212	-0.0477267	0.038497	14.1297	0.0500461
0.72732	0.0877146	0.0290266	0.000136805	14.1667	2.99	2.09167	1.76791	0.246268	0.0478845	0.0352078	14.121	0.0457702
0.72848	0.0861033	0.0289999	0.000135753	14.1541	2.99	2.09167	-1.38908	0.245638	-0.543012	0.0319026	14.1126	0.0414734
0.72964	0.0868357	0.0289718	0.000137259	14.1397	2.99	2.09167	0.631398	0.245744	0.0917914	0.0293272	14.1016	0.0381254
0.7308	0.0874216	0.0289494	0.000146273	14.125	2.99	2.09167	0.505119	0.245677	-0.057969	0.0266725	14.0903	0.0346743
0.73196	0.0877146	0.0289366	0.000166098	14.1106	2.99	2.09167	0.252559	0.245493	-0.158716	0.0241253	14.0792	0.0313629
0.73312	0.0877146	0.0289156	0.000173923	14.0971	2.99	2.09167	0	0.245306	-0.161461	0.0218102	14.0687	0.0283532
0.73428	0.088154	0.0288832	0.000168377	14.0835	2.99	2.09167	0.378839	0.245229	-0.0662017	0.0197277	14.0578	0.025646
0.73544	0.0875681	0.0288491	0.000159631	14.0704	2.99	2.09167	-0.505119	0.245092	-0.118087	0.0177543	14.0473	0.0230805
0.7366	0.0853708	0.0288149	0.000151804	14.0568	2.99	2.09167	-1.89419	0.245293	0.173241	0.0159533	14.0361	0.0207393
0.73776	0.0888865	0.0287829	0.000150116	14.0418	2.99	2.09167	3.03071	0.246458	1.00406	0.0139527	14.0237	0.0181384
0.73892	0.089033	0.0287592	0.000158142	14.0269	2.99	2.09167	0.12628	0.246368	-0.0771397	0.0106951	14.013	0.0139037
0.74008	0.0894724	0.0287481	0.00017396	14.015	2.99	2.09167	0.378839	0.246333	-0.0305069	0.00754913	14.0052	0.00981388
0.74124	0.08874	0.0287267	0.000176407	14.0035	2.99	2.09167	-0.631398	0.246238	-0.0819612	0.00445143	13.9977	0.00578687
0.7424	0.0900583	0.0287015	0.000174282	13.992	2.99	2.09167	1.13652	0.246538	0.258847	0.00146343	13.9901	0.00190246
0.74356	0.0906443	0.0286776	0.000172533	13.981	2.99	2.09167	0.505119	0.246437	-0.0867552	-0.00185131	13.9835	-0.0024067
0.74472	0.0896189	0.0286544	0.000176383	13.9681	2.99	2.09167	-0.883957	0.24622	-0.187208	-0.00505826	13.9747	-0.00657574
0.74588	0.0909372	0.028639	0.000189683	13.955	2.99	2.09167	1.13652	0.246512	0.251671	-0.00803399	13.9655	-0.0104442
0.74704	0.0909372	0.0286349	0.000214364	13.9429	2.99	2.09167	0	0.246403	-0.0939422	-0.0113394	13.9576	-0.0147412
0.7482	0.0915232	0.0286197	0.000225417	13.9309	2.99	2.09167	0.505119	0.246405	0.00174224	-0.0145399	13.9498	-0.0189019
0.74936	0.0918162	0.0285966	0.000227521	13.9187	2.99	2.09167	0.252559	0.24629	-0.0987233	-0.0177612	13.9418	-0.0230895
0.75052	0.0915232	0.028575	0.000228926	13.9075	2.99	2.09167	-0.252559	0.246173	-0.101157	-0.0208796	13.9347	-0.0271435
0.75168	0.0926951	0.0285534	0.000233481	13.8951	2.99	2.09167	1.01024	0.24628	0.0925138	-0.0238961	13.9262	-0.031065
0.75284	0.0925486	0.0285382	0.000246961	13.8821	2.99	2.09167	-0.12628	0.246044	-0.204151	-0.0270605	13.9173	-0.0351786
0.754	0.0937205	0.0285327	0.000271573	13.8693	2.99	2.09167	1.01024	0.245975	-0.0595681	-0.03	13.9083	-0.039
0.75516	0.093574	0.0285174	0.000283408	13.8569	2.99	2.09167	-0.12628	0.245561	-0.356352	-0.0329019	13.8997	-0.0427725
0.75632	0.0937205	0.0284905	0.000281097	13.8447	2.99	2.09167	0.12628	0.245315	-0.211956	-0.0353933	13.8907	-0.0460113
0.75748	0.093574	0.028464	0.000276735	13.8335	2.99	2.09167	-0.12628	0.245123	-0.165731	-0.0376605	13.8824	-0.0489587
0.75864	0.0954783	0.0284394	0.00027417	13.8225	2.99	2.09167	1.64164	0.245098	-0.0215052	-0.0397652	13.8742	-0.0516948
0.7598	0.0941599	0.0284184	0.000279449	13.81	2.99	2.09167	-1.13652	0.244444	-0.563819	-0.0418931	13.8645	-0.054461
0.76096	0.0948923	0.028407	0.000295325	13.7979	2.99	2.09167	0.631398	0.244412	-0.0275543	-0.0433584	13.8543	-0.0563659
0.76212	0.0951853	0.028397	0.000311356	13.7864	2.99	2.09167	0.252559	0.244206	-0.177831	-0.0448437	13.8447	-0.0582968
0.76328	0.0956248	0.0283762	0.000313804	13.7752	2.99	2.09167	0.378839	0.243996	-0.181075	-0.0461603	13.8352	-0.0600083
0.76444	0.0956248	0.0283547	0.000313666	13.7647	2.99	2.09167	0	0.243725	-0.233438	-0.0473055	13.8262	-0.0614972
0.7656	0.0945994	0.0283361	0.000314791	13.7551	2.99	2.09167	-0.883957	0.243564	-0.138794	-0.0482145	13.8178	-0.0626789
0.76676	0.0960642	0.0283188	0.000322405	13.7436	2.99	2.09167	1.2628	0.243911	0.299054	-0.0490085	13.8073	-0.0637111
0.76792	0.0966501	0.0283104	0.000340359	13.732	2.99	2.09167	0.505119	0.243799	-0.0966069	-0.0502444	13.7973	-0.0653177
0.76908	0.0967966	0.0283021	0.00035849	13.7205	2.99	2.09167	0.12628	0.243569	-0.198084	-0.0514214	13.7874	-0.0668478
0.77024	0.0970896	0.0282828	0.000363332	13.7091	2.99	2.09167	0.252559	0.243392	-0.152538	-0.0524122	13.7772	-0.0681358
0.7714	0.0973826	0.0282587	0.000362587	13.6976	2.99	2.09167	0.252559	0.243211	-0.156097	-0.0532759	13.7668	-0.0692587
0.77256	0.0973826	0.0282374	0.000361753	13.6875	2.99	2.09167	0	0.243026	-0.159728	-0.0540091	13.7577	-0.0702118
0.77372	0.0967966	0.0282176	0.000365779	13.6761	2.99	2.09167	-0.505119	0.24295	-0.0653543	-0.0546081	13.7471	-0.0709905
0.77488	0.098115	0.0282054	0.00037879	13.6648	2.99	2.09167	1.13652	0.243211	0.225141	-0.0551934	13.7365	-0.0717515
0.77604	0.098408	0.0281934	0.000392269	13.6534	2.99	2.09167	0.252559	0.24307	-0.121754	-0.0561346	13.7263	-0.072975
0.7772	0.0985544	0.0281709	0.000392751	13.6421	2.99	2.09167	0.12628	0.242924	-0.125439	-0.0569925	13.7162	-0.0740903
0.77836	0.0998728	0.0281411	0.000383809	13.6312	2.99	2.09167	1.13652	0.242831	-0.0801422	-0.0577636	13.7063	-0.0750926
0.77952	0.0994333	0.0281131	0.000374788	13.6212	2.99	2.09167	-0.378839	0.242336	-0.427184	-0.0585062	13.6972	-0.076058
0.78068	0.0989939	0.028088	0.000369807	13.6109	2.99	2.09167	-0.378839	0.24212	-0.185966	-0.0587808	13.6873	-0.076415
0.78184	0.0997263	0.0280688	0.000373264	13.6001	2.99	2.09167	0.631398	0.242184	0.0551698	-0.0588939	13.6767	-0.0765621
0.783	0.100166	0.0280535	0.000378836	13.5903	2.99	2.09167	0.378839	0.242073	-0.0959733	-0.0591519	13.6672	-0.0768975
0.78416	0.100166	0.0280398	0.000384877	13.5811	2.99	2.09167	0	0.2419	-0.149083	-0.0593631	13.6583	-0.077172
0.78532	0.100752	0.0280176	0.000380391	13.5721	2.99	2.09167	0.505119	0.241836	-0.0551466	-0.0594604	13.6494	-0.0772985
0.78648	0.100898	0.0279961	0.000374174	13.5641	2.99	2.09167	0.12628	0.241653	-0.157386	-0.0595632	13.6415	-0.0774321
0.78764	0.101484	0.027979	0.000370073	13.5574	2.99	2.09167	0.505119	0.241523	-0.112584	-0.0595418	13.6348	-0.0774043
0.7888	0.0991404	0.0279651	0.000373585	13.5492	2.99	2.09167	-2.02047	0.241273	-0.214945	-0.0594531	13.6265	-0.077289
0.78996	0.101338	0.027962	0.000387735	13.5418	2.99	2.09167	1.89419	0.242043	0.663353	-0.059167	13.6187	-0.076917
0.79112	0.100459	0.0279597	0.000402633	13.5346	2.99	2.09167	-0.757678	0.242068	0.0217776	-0.059798	13.6123	-0.0777375
0.79228	0.102363	0.0279468	0.000403987	13.5277	2.99	2.09167	1.64164	0.242544	0.410006	-0.0605327	13.6064	-0.0786925
0.79344	0.102656	0.027934	0.000403072	13.5218	2.99	2.09167	0.252559	0.242389	-0.133299	-0.0618646	13.6022	-0.080424
0.7946	0.103095	0.0279259	0.000404286	13.5173	2.99	2.09167	0.378839	0.24223	-0.137248	-0.0631059	13.5994	-0.0820377
0.79576	0.102802	0.0279201	0.000412852	13.5109	2.99	2.09167	-0.252559	0.242009	-0.190297	-0.064253	13.5945	-0.083529
0.79692	0.102949	0.0279234	0.000429601	13.5057	2.99	2.09167	0.12628	0.242011	0.0017569	-0.0652402	13.5905	-0.0848122
0.79808	0.103828	0.0279259	0.000447116	13.4997	2.99	2.09167	0.757678	0.242065	0.0466991	-0.0663124	13.5859	-0.0862061
0.79924	0.102949	0.0279174	0.000453307	13.493	2.99	2.09167	-0.757678	0.241887	-0.153528	-0.067528	13.5808	-0.0877864
0.8004	0.104121	0.0279047	0.000452576	13.4871	2.99	2.09167	1.01024	0.242159	0.234631	-0.0686345	13.5763	-0.0892249
0.80156	0.10456	0.0278963	0.000453722	13.4825	2.99	2.09167	0.378839	0.242086	-0.0636353	-0.070126	13.5737	-0.0911638
0.80272	0.104707	0.0278905	0.000460594	13.4768	2.99	2.09167	0.12628	0.24195	-0.11674	-0.0716257	13.5699	-0.0931134
0.80388	0.105146	0.027893	0.000477319	13.4712	2.99	2.09167	0.378839	0.241867	-0.0718216	-0.0730681	13.5661	-0.0949885
0.80504	0.106025	0.0278941	0.000494281	13.4647	2.99	2.09167	0.757678	0.241722	-0.125011	-0.0745121	13.5616	-0.0968657
0.8062	0.105732	0.0278904	0.000501041	13.4601	2.99	2.09167	-0.252559	0.241344	-0.325372	-0.075892	13.5588	-0.0986596
0.80736	0.105879	0.0278809	0.000498976	13.4563	2.99	2.09167	0.12628	0.24119	-0.133575	-0.0769552	13.5563	-0.100042
0.80852	0.106318	0.0278742	0.000496884	13.4539	2.99	2.09167	0.378839	0.241086	-0.0889526	-0.0779465	13.5552	-0.101331
0.80968	0.107051	0.0278724	0.000499162	13.4521	2.99	2.09167	0.631398	0.240921	-0.142445	-0.0789239	13.5547	-0.102601
0.81084	0.106611	0.0278757	0.000510761	13.4489	2.99	2.09167	-0.378839	0.24058	-0.294078	-0.0798206	13.5527	-0.103767
0.812	0.106904	0.0278776	0.000522063	13.4452	2.99	2.09167	0.252559	0.240518	-0.0535414	-0.0804454	13.5498	-0.104579
0.81316	0.107197	0.0278806	0.000533897	13.4418	2.99	2.09167	0.252559	0.24045	-0.0582172	-0.0811043	13.5472	-0.105436
0.81432	0.107636	0.0278776	0.000537196	13.439	2.99	2.09167	0.378839	0.240377	-0.062919	-0.0817922	13.5453	-0.10633
0.81548	0.108515	0.0278761	0.000539111	13.4374	2.99	2.09167	0.757678	0.240242	-0.116688	-0.0825041	13.5447	-0.107255
0.81664	0.107929	0.02788	0.00054459	13.4371	2.99	2.09167	-0.505119	0.239874	-0.317622	-0.0831726	13.5452	-0.108124
0.8178	0.108662	0.027887	0.000557761	13.4351	2.99	2.09167	0.631398	0.239841	-0.0283216	-0.0835435	13.5437	-0.108607
0.81896	0.107783	0.0278919	0.000570655	13.4322	2.99	2.09167	-0.757678	0.239631	-0.180374	-0.0839845	13.5414	-0.10918
0.82012	0.108808	0.0278968	0.00058383	13.4292	2.99	2.09167	0.883958	0.239871	0.206909	-0.0843032	13.5388	-0.109594
0.82128	0.109101	0.0278949	0.000588217	13.4264	2.99	2.09167	0.252559	0.239821	-0.0432069	-0.0849915	13.5369	-0.110489
0.82244	0.109394	0.0278883	0.000585193	13.4245	2.99	2.09167	0.252559	0.239766	-0.0481543	-0.0857328	13.5359	-0.111453
0.8236	0.109394	0.0278867	0.00058438	13.424	2.99	2.09167	0	0.239704	-0.0531224	-0.0865219	13.5365	-0.112478
0.82476	0.110127	0.0278896	0.000589902	13.4232	2.99	2.09167	0.631398	0.23975	0.0399612	-0.0873533	13.5367	-0.113559
0.82592	0.112617	0.0278897	0.000594612	13.4213	2.99	2.09167	2.14675	0.23962	-0.112126	-0.0883464	13.5361	-0.11485
0.82708	0.113056	0.0278905	0.000600162	13.4194	2.99	2.09167	0.378839	0.238631	-0.852718	-0.0893093	13.5355	-0.116102
0.82824	0.111006	0.0278855	0.000597208	13.4181	2.99	2.09167	-1.76791	0.237579	-0.907165	-0.0893031	13.5342	-0.116094
0.8294	0.110566	0.0278794	0.000591521	13.4175	2.99	2.09167	-0.378839	0.23743	-0.128377	-0.0882586	13.5322	-0.114736
0.83056	0.112617	0.0278795	0.000588597	13.4187	2.99	2.09167	1.76791	0.237558	0.110937	-0.0871633	13.532	-0.113312
0.83172	0.112617	0.0278828	0.000592835	13.4186	2.99	2.09167	0	0.236998	-0.483342	-0.0863194	13.5308	-0.112215
0.83288	0.112031	0.0278826	0.000595988	13.4172	2.99	2.09167	-0.505119	0.236544	-0.391309	-0.0849715	13.5277	-0.110463
0.83404	0.112324	0.0278817	0.000599707	13.4152	2.99	2.09167	0.252559	0.236424	-0.103302	-0.0832348	13.5234	-0.108205
0.8352	0.11247	0.0278769	0.00059602	13.4144	2.99	2.09167	0.12628	0.236297	-0.109567	-0.0814726	13.5203	-0.105914
0.83636	0.112763	0.027868	0.000585201	13.4145	2.99	2.09167	0.252559	0.236219	-0.066844	-0.0796747	13.5181	-0.103577
0.83752	0.11291	0.0278641	0.000576318	13.4163	2.99	2.09167	0.12628	0.236135	-0.0731905	-0.0778931	13.5175	-0.101261
0.83868	0.113349	0.0278663	0.000573491	13.4185	2.99	2.09167	0.378839	0.236099	-0.0305302	-0.0761174	13.5174	-0.0989527
0.83984	0.113642	0.0278633	0.000568745	13.419	2.99	2.09167	0.252559	0.235999	-0.0859595	-0.0743997	13.5157	-0.0967196
0.841	0.113789	0.0278592	0.000564278	13.4188	2.99	2.09167	0.12628	0.235892	-0.0923905	-0.0726672	13.5133	-0.0944674
0.84216	0.114228	0.0278606	0.000564762	13.4193	2.99	2.09167	0.378839	0.235834	-0.049825	-0.0709098	13.5115	-0.0921827
0.84332	0.114375	0.0278582	0.000558375	13.4208	2.99	2.09167	0.12628	0.235712	-0.105358	-0.0691791	13.5107	-0.0899328
0.84448	0.114521	0.0278592	0.000552812	13.4235	2.99	2.09167	0.12628	0.235639	-0.0628621	-0.0674024	13.5111	-0.0876232
0.84564	0.115693	0.027867	0.000552469	13.4275	2.99	2.09167	1.01024	0.235616	-0.020394	-0.0656316	13.5128	-0.085321
0.8468	0.114961	0.0278677	0.000549923	13.4289	2.99	2.09167	-0.631398	0.235243	-0.321202	-0.0639181	13.512	-0.0830936
0.84796	0.115254	0.0278668	0.000547098	13.4296	2.99	2.09167	0.252559	0.235261	0.0153397	-0.0618781	13.5101	-0.0804415
0.84912	0.11584	0.0278706	0.000549216	13.4306	2.99	2.09167	0.505119	0.235271	0.00862155	-0.0599361	13.5085	-0.0779169
0.85028	0.115986	0.0278701	0.000543906	13.4325	2.99	2.09167	0.12628	0.235159	-0.0961672	-0.0580811	13.508	-0.0755054
0.85144	0.116133	0.0278712	0.000538588	13.4353	2.99	2.09167	0.12628	0.235097	-0.0538862	-0.0561777	13.5083	-0.073031
0.8526	0.116426	0.0278795	0.00053766	13.4397	2.99	2.09167	0.252559	0.235083	-0.0116302	-0.0542773	13.5103	-0.0705605
0.85376	0.116719	0.0278823	0.000534247	13.4425	2.99	2.09167	0.252559	0.235062	-0.0184164	-0.052431	13.5106	-0.0681603
0.85492	0.117011	0.027883	0.000529998	13.4446	2.99	2.09167	0.252559	0.235033	-0.0252103	-0.0506279	13.5104	-0.0658162
0.85608	0.116865	0.0278856	0.000529859	13.4459	2.99	2.09167	-0.12628	0.234996	-0.0320172	-0.048857	13.5094	-0.0635141
0.85724	0.117597	0.0278841	0.000522283	13.4483	2.99	2.09167	0.631398	0.235121	0.108276	-0.0471076	13.5095	-0.0612398
0.8584	0.11789	0.0278797	0.000508642	13.4517	2.99	2.09167	0.252559	0.235068	-0.0456086	-0.0455553	13.511	-0.0592219
0.85956	0.11789	0.0278813	0.000498276	13.4568	2.99	2.09167	0	0.235007	-0.0524017	-0.044003	13.514	-0.0572039
0.86072	0.118476	0.0278887	0.000494757	13.4619	2.99	2.09167	0.505119	0.235053	0.0388586	-0.0424401	13.5171	-0.0551721
0.86188	0.11833	0.0278916	0.000489833	13.4653	2.99	2.09167	-0.12628	0.234976	-0.0660155	-0.0409803	13.5186	-0.0532744
0.86304	0.118623	0.0278933	0.000485977	13.4677	2.99	2.09167	0.252559	0.235062	0.0742698	-0.0394888	13.5191	-0.0513354
0.8642	0.118916	0.0279025	0.000488137	13.4714	2.99	2.09167	0.252559	0.23514	0.067475	-0.0381417	13.5209	-0.0495842
0.86536	0.119502	0.027909	0.00048394	13.4763	2.99	2.09167	0.505119	0.235211	0.0607103	-0.0369286	13.5243	-0.0480072
0.86652	0.119355	0.0279202	0.000481634	13.4827	2.99	2.09167	-0.12628	0.23516	-0.0441009	-0.0358395	13.5293	-0.0465914
0.86768	0.120674	0.0279392	0.000484791	13.4907	2.99	2.09167	1.13652	0.235271	0.0962552	-0.0347399	13.5359	-0.0451619
0.86884	0.121113	0.0279503	0.000486265	13.4955	2.99	2.09167	0.378839	0.234977	-0.253723	-0.0338066	13.5395	-0.0439486
0.87	0.116279	0.0279584	0.000487431	13.499	2.99	2.09167	-4.16723	0.234618	-0.309589	-0.0325942	13.5414	-0.0423724
0.87116	0.121845	0.0279718	0.000494337	13.5028	2.99	2.09167	4.79863	0.236242	1.39977	-0.0310301	13.5431	-0.0403391
0.87232	0.122871	0.0279817	0.000494616	13.5075	2.99	2.09167	0.883958	0.23581	-0.37193	-0.0312823	13.5482	-0.0406669
0.87348	0.12126	0.0279922	0.00049459	13.5127	2.99	2.09167	-1.38908	0.235087	-0.623623	-0.031102	13.5531	-0.0404326
0.87464	0.121845	0.0280103	0.000499483	13.5195	2.99	2.09167	0.505119	0.235095	0.00708362	-0.0301696	13.5587	-0.0392205
0.8758	0.121845	0.0280204	0.000501325	13.5237	2.99	2.09167	0	0.234982	-0.097775	-0.0292845	13.5618	-0.0380699
0.87696	0.121113	0.0280274	0.00050204	13.5268	2.99	2.09167	-0.631398	0.234974	-0.00652414	-0.0283125	13.5636	-0.0368062
0.87812	0.122431	0.0280378	0.000507679	13.5296	2.99	2.09167	1.13652	0.235357	0.329911	-0.0273681	13.5652	-0.0355785
0.87928	0.122431	0.028048	0.000508344	13.5343	2.99	2.09167	0	0.235333	-0.0200336	-0.0268773	13.5693	-0.0349404
0.88044	0.123017	0.0280566	0.000504313	13.5402	2.99	2.09167	0.505119	0.235416	0.0713526	-0.0263951	13.5745	-0.0343136
0.8816	0.123017	0.0280723	0.00050438	13.5479	2.99	2.09167	0	0.235377	-0.0333793	-0.026037	13.5817	-0.0338481
0.88276	0.123164	0.0280814	0.000500299	13.554	2.99	2.09167	0.12628	0.235445	0.0580233	-0.0256696	13.5874	-0.0333705
0.88392	0.123603	0.0280849	0.000494815	13.558	2.99	2.09167	0.378839	0.235561	0.100416	-0.0254085	13.591	-0.033031
0.88508	0.12331	0.0280913	0.000493977	13.5615	2.99	2.09167	-0.252559	0.235613	0.0447767	-0.0253071	13.5944	-0.0328992
0.88624	0.124336	0.0281056	0.000500257	13.5659	2.99	2.09167	0.883957	0.235885	0.234347	-0.0252946	13.5988	-0.032883
0.8874	0.124336	0.028118	0.000501561	13.5714	2.99	2.09167	0	0.235865	-0.0173164	-0.0256117	13.6047	-0.0332953
0.88856	0.124629	0.0281358	0.000505588	13.5785	2.99	2.09167	0.252559	0.235951	0.0742759	-0.0259394	13.6122	-0.0337212
0.88972	0.124922	0.0281499	0.000504641	13.5858	2.99	2.09167	0.252559	0.23603	0.0678267	-0.0263943	13.6201	-0.0343126
0.89088	0.126093	0.0281551	0.00050147	13.5896	2.99	2.09167	1.01024	0.236101	0.0614078	-0.0269688	13.6247	-0.0350594
0.89204	0.126679	0.0281612	0.000502947	13.592	2.99	2.09167	0.505119	0.235824	-0.23921	-0.0276555	13.628	-0.0359521
0.8932	0.125801	0.0281728	0.000512371	13.5938	2.99	2.09167	-0.757678	0.235425	-0.343785	-0.0280736	13.6303	-0.0364957
0.89436	0.126679	0.0281812	0.000516	13.5965	2.99	2.09167	0.757678	0.235473	0.0418638	-0.0280909	13.633	-0.0365182
0.89552	0.127265	0.0281884	0.00051906	13.5987	2.99	2.09167	0.505119	0.235287	-0.160922	-0.0281971	13.6354	-0.0366562
0.89668	0.125947	0.0281955	0.000517976	13.6027	2.99	2.09167	-1.13652	0.234978	-0.265705	-0.0281347	13.6392	-0.0365752
0.89784	0.12873	0.0281935	0.000513575	13.6035	2.99	2.09167	2.39931	0.235288	0.266883	-0.0277708	13.6396	-0.0361021
0.899	0.127558	0.0281894	0.000511352	13.6024	2.99	2.09167	-1.01024	0.234623	-0.573466	-0.027781	13.6385	-0.0361153
0.90016	0.127119	0.0281893	0.000515156	13.6008	2.99	2.09167	-0.378839	0.234518	-0.0900534	-0.0270984	13.636	-0.0352279
0.90132	0.128291	0.0281903	0.00051509	13.6013	2.99	2.09167	1.01024	0.23469	0.14813	-0.0263359	13.6355	-0.0342367
0.90248	0.127998	0.0281886	0.00051143	13.602	2.99	2.09167	-0.252559	0.234513	-0.153036	-0.0257949	13.6355	-0.0335333
0.90364	0.128437	0.0281932	0.000511597	13.6042	2.99	2.09167	0.378839	0.234555	0.0361069	-0.0250923	13.6368	-0.03262
0.9048	0.128877	0.0281914	0.000507618	13.6049	2.99	2.09167	0.378839	0.234531	-0.0199224	-0.0244675	13.6367	-0.0318077
0.90596	0.128877	0.0281823	0.000502241	13.6027	2.99	2.09167	0	0.234443	-0.0759603	-0.0238484	13.6337	-0.0310029
0.90712	0.129023	0.0281762	0.000502337	13.5996	2.99	2.09167	0.12628	0.234461	0.0150793	-0.0231631	13.6297	-0.0301121
0.90828	0.129316	0.0281787	0.000510654	13.5974	2.99	2.09167	0.252559	0.234527	0.0570897	-0.0225264	13.6267	-0.0292843
0.90944	0.129609	0.0281797	0.000514826	13.5962	2.99	2.09167	0.252559	0.234585	0.0500871	-0.0219908	13.6248	-0.028588
0.9106	0.13415	0.0281854	0.000521451	13.5962	2.99	2.09167	3.91467	0.234635	0.0431069	-0.0215467	13.6243	-0.0280107
0.91176	0.134004	0.028187	0.00052256	13.5966	2.99	2.09167	-0.12628	0.233027	-1.38595	-0.0211846	13.6241	-0.02754
0.91292	0.130342	0.0281803	0.000520628	13.5941	2.99	2.09167	-3.15699	0.231582	-1.24642	-0.0190901	13.6189	-0.0248171
0.91408	0.129609	0.028176	0.000522803	13.5911	2.99	2.09167	-0.631398	0.231662	0.0694534	-0.0154375	13.6112	-0.0200688
0.91524	0.130927	0.0281793	0.000531834	13.589	2.99	2.09167	1.13652	0.232131	0.404603	-0.0118927	13.6045	-0.0154606
0.9164	0.13122	0.0281805	0.000536453	13.5877	2.99	2.09167	0.252559	0.232193	0.053406	-0.00887667	13.5993	-0.0115397
0.91756	0.13122	0.0281809	0.000540512	13.5862	2.99	2.09167	0	0.232246	0.0454983	-0.00593967	13.5939	-0.00772157
0.91872	0.131513	0.0281772	0.000538238	13.5854	2.99	2.09167	0.252559	0.232404	0.135684	-0.00306796	13.5893	-0.00398834
0.91988	0.132099	0.0281655	0.000532656	13.5819	2.99	2.09167	0.505119	0.232552	0.127858	-0.000372386	13.5824	-0.000484101
0.92104	0.132832	0.028155	0.000530635	13.5776	2.99	2.09167	0.631398	0.232577	0.0220129	0.00216041	13.5748	0.00280853
0.9222	0.133271	0.0281503	0.000536299	13.5729	2.99	2.09167	0.378839	0.232423	-0.132859	0.004668	13.5669	0.0060684
0.92336	0.132685	0.0281511	0.000542227	13.5709	2.99	2.09167	-0.505119	0.232203	-0.189717	0.00735017	13.5614	0.00955522
0.92452	0.132978	0.028151	0.000544299	13.57	2.99	2.09167	0.252559	0.232315	0.0966043	0.0102825	13.5567	0.0133673
0.92568	0.132832	0.0281467	0.000539489	13.5699	2.99	2.09167	-0.12628	0.232418	0.088744	0.0131053	13.5528	0.0170368
0.92684	0.133271	0.028137	0.000529722	13.5692	2.99	2.09167	0.378839	0.232683	0.228036	0.015832	13.5486	0.0205816
0.928	0.132392	0.0281253	0.000522415	13.5664	2.99	2.09167	-0.757678	0.232881	0.171279	0.0182894	13.5427	0.0237762
0.92916	0.13459	0.028119	0.00052169	13.5636	2.99	2.09167	1.89419	0.233526	0.555941	0.0205525	13.5369	0.0267183
0.93032	0.132978	0.0281221	0.00053002	13.5617	2.99	2.09167	-1.38908	0.233423	-0.0889422	0.022136	13.533	0.0287768
0.93148	0.135176	0.0281246	0.000534763	13.561	2.99	2.09167	1.89419	0.234051	0.541119	0.0238605	13.53	0.0310187
0.93264	0.13415	0.0281203	0.000531796	13.5601	2.99	2.09167	-0.883957	0.233931	-0.10356	0.0249284	13.5277	0.032407
0.9338	0.134443	0.0281126	0.000523042	13.5599	2.99	2.09167	0.252559	0.234314	0.330546	0.0261594	13.5259	0.0340073
0.93496	0.137226	0.0280993	0.000515097	13.5567	2.99	2.09167	2.39931	0.234689	0.323461	0.0270041	13.5216	0.0351053
0.93612	0.135761	0.0280894	0.00051263	13.5528	2.99	2.09167	-1.2628	0.23409	-0.517122	0.0274723	13.5171	0.035714
0.93728	0.135908	0.0280876	0.00051894	13.5494	2.99	2.09167	0.12628	0.234164	0.0641595	0.0286319	13.5121	0.0372215
0.93844	0.136201	0.0280845	0.000521657	13.5467	2.99	2.09167	0.252559	0.234287	0.106055	0.0297464	13.5081	0.0386703
0.9396	0.13415	0.0280783	0.000514185	13.5468	2.99	2.09167	-1.76791	0.234402	0.0989586	0.0307641	13.5068	0.0399933
0.94076	0.136933	0.0280678	0.000500367	13.5473	2.99	2.09167	2.39931	0.235419	0.876513	0.0316951	13.5061	0.0412036
0.94192	0.137666	0.02805	0.000484599	13.5451	2.99	2.09167	0.631398	0.235461	0.0362138	0.0315537	13.5041	0.0410199
0.94308	0.137226	0.0280331	0.00047292	13.5416	2.99	2.09167	-0.378839	0.235324	-0.117539	0.0314064	13.5008	0.0408284
0.94424	0.139424	0.0280233	0.000468901	13.5384	2.99	2.09167	1.89419	0.235465	0.120956	0.0314482	13.4976	0.0408827
0.9454	0.137226	0.0280239	0.000477212	13.5353	2.99	2.09167	-1.89419	0.234858	-0.523173	0.0313764	13.4946	0.0407893
0.94656	0.138105	0.0280247	0.000482462	13.5336	2.99	2.09167	0.757678	0.23521	0.303596	0.0320085	13.4919	0.0416111
0.94772	0.138398	0.0280198	0.000480529	13.5319	2.99	2.09167	0.252559	0.235327	0.100708	0.0322959	13.49	0.0419846
0.94888	0.138691	0.02801	0.000473611	13.53	2.99	2.09167	0.252559	0.235436	0.0940147	0.0324964	13.4878	0.0422453
0.95004	0.13957	0.027997	0.000469678	13.5253	2.99	2.09167	0.757678	0.235537	0.0873655	0.0326188	13.4829	0.0424045
0.9512	0.139131	0.0279891	0.000472853	13.5201	2.99	2.09167	-0.378839	0.235403	-0.115396	0.0326717	13.4776	0.0424733
0.95236	0.13957	0.0279917	0.000486162	13.5159	2.99	2.09167	0.378839	0.235546	0.123131	0.0329126	13.4731	0.0427864
0.95352	0.14001	0.0279938	0.000496687	13.5126	2.99	2.09167	0.378839	0.235624	0.0674871	0.033039	13.4696	0.0429507
0.95468	0.14001	0.0279897	0.000499761	13.5093	2.99	2.09167	0	0.235638	0.0118724	0.0331216	13.4663	0.0430581
0.95584	0.140449	0.0279816	0.000497309	13.5063	2.99	2.09167	0.378839	0.235758	0.103377	0.0332312	13.4631	0.0432006
0.957	0.140595	0.0279694	0.000496753	13.5006	2.99	2.09167	0.12628	0.235813	0.0478147	0.0332518	13.4574	0.0432273
0.95816	0.140156	0.0279609	0.000502767	13.4939	2.99	2.09167	-0.378839	0.235918	0.09035	0.0332539	13.4507	0.04323
0.95932	0.141767	0.0279609	0.000518104	13.4876	2.99	2.09167	1.38908	0.2363	0.329077	0.0331835	13.4445	0.0431385
0.96048	0.140742	0.0279599	0.000530397	13.4821	2.99	2.09167	-0.883957	0.236162	-0.118578	0.0327375	13.4396	0.0425587
0.96164	0.141767	0.0279475	0.000529205	13.4765	2.99	2.09167	0.883957	0.236529	0.316396	0.0324835	13.4343	0.0422286
0.9628	0.141914	0.0279304	0.000521675	13.4712	2.99	2.09167	0.12628	0.236605	0.064981	0.0318692	13.4298	0.0414299
0.96396	0.141767	0.0279096	0.000515227	13.4637	2.99	2.09167	-0.12628	0.23673	0.107824	0.0312128	13.4231	0.0405766
0.96512	0.142646	0.0278896	0.000513984	13.4544	2.99	2.09167	0.757678	0.237018	0.248791	0.0304592	13.4148	0.0395969
0.96628	0.142793	0.0278763	0.000521792	13.4447	2.99	2.09167	0.12628	0.237073	0.0466043	0.0294284	13.4064	0.0382569
0.96744	0.143086	0.0278745	0.000540856	13.4359	2.99	2.09167	0.252559	0.237177	0.0896276	0.0283758	13.3991	0.0368885
0.9686	0.142939	0.0278621	0.000546439	13.4276	2.99	2.09167	-0.12628	0.237274	0.0836543	0.0272455	13.3921	0.0354191
0.96976	0.144111	0.0278441	0.000544867	13.4194	2.99	2.09167	1.01024	0.237534	0.224833	0.0260435	13.3856	0.0338566
0.97092	0.143818	0.0278249	0.000542464	13.411	2.99	2.09167	-0.252559	0.237447	-0.0752302	0.0245892	13.379	0.031966
0.97208	0.143965	0.0278034	0.000543627	13.4	2.99	2.09167	0.12628	0.237581	0.115053	0.0232616	13.3697	0.0302401
0.97324	0.150263	0.027788	0.000553306	13.3884	2.99	2.09167	5.43002	0.237764	0.158275	0.0218175	13.3601	0.0283628
0.9744	0.145283	0.0277827	0.000573705	13.3775	2.99	2.09167	-4.29351	0.235609	-1.85802	0.0202002	13.3512	0.0262602
0.97556	0.14499	0.0277687	0.000581737	13.3673	2.99	2.09167	-0.252559	0.235494	-0.0992422	0.0209671	13.34	0.0272573
0.97672	0.145283	0.0277455	0.000580706	13.3563	2.99	2.09167	0.252559	0.235598	0.0902819	0.0218867	13.3279	0.0284527
0.97788	0.145576	0.0277204	0.000576935	13.3456	2.99	2.09167	0.252559	0.235696	0.0836957	0.0227194	13.3161	0.0295352
0.97904	0.145722	0.027692	0.000575646	13.3322	2.99	2.09167	0.12628	0.235785	0.0771474	0.0234747	13.3017	0.0305171
0.9802	0.146015	0.0276673	0.000580962	13.3179	2.99	2.09167	0.252559	0.235924	0.119671	0.0241619	13.2865	0.0314104
0.98136	0.146308	0.0276512	0.000596461	13.3036	2.99	2.09167	0.252559	0.236055	0.113211	0.0247278	13.2715	0.0321461
0.98252	0.146601	0.0276369	0.000610601	13.2908	2.99	2.09167	0.252559	0.236179	0.106802	0.0251814	13.2581	0.0327358
0.98368	0.14748	0.0276109	0.000611568	13.2777	2.99	2.09167	0.757678	0.236296	0.100441	0.0255314	13.2445	0.0331908
0.98484	0.147187	0.0275849	0.000611182	13.2651	2.99	2.09167	-0.252559	0.236177	-0.102026	0.0257863	13.2316	0.0335222
0.986	0.147773	0.0275571	0.000614669	13.2501	2.99	2.09167	0.505119	0.236279	0.0877638	0.0262035	13.216	0.0340645
0.98716	0.146601	0.0275358	0.000626978	13.2346	2.99	2.09167	-1.01024	0.23626	-0.0166336	0.0265425	13.2001	0.0345052
0.98832	0.148213	0.0275246	0.00065059	13.2193	2.99	2.09167	1.38908	0.236802	0.467415	0.0269363	13.1843	0.0350172
0.98948	0.148506	0.0275017	0.000661046	13.2038	2.99	2.09167	0.252559	0.236825	0.019956	0.0267709	13.169	0.0348022
0.99064	0.149385	0.0274668	0.000660275	13.187	2.99	2.09167	0.757678	0.236841	0.0138457	0.0266142	13.1524	0.0345985
0.9918	0.149238	0.027431	0.000658174	13.1703	2.99	2.09167	-0.12628	0.236623	-0.188409	0.0264738	13.1359	0.0344159
0.99296	0.148799	0.0273939	0.000658042	13.1522	2.99	2.09167	-0.378839	0.236568	-0.0474853	0.0266061	13.1176	0.0345879
0.99412	0.149677	0.0273618	0.000664827	13.1337	2.99	2.09167	0.757678	0.23679	0.191495	0.0268324	13.0988	0.0348821
0.99528	0.149385	0.0273383	0.000682107	13.1151	2.99	2.09167	-0.252559	0.236777	-0.010781	0.0268497	13.0802	0.0349047
0.99644	0.150117	0.0273133	0.000690645	13.0993	2.99	2.09167	0.631398	0.236985	0.179242	0.0269148	13.0643	0.0349893
0.9976	0.15041	0.027277	0.000685769	13.0835	2.99	2.09167	0.252559	0.237015	0.0260802	0.0267866	13.0487	0.0348225
0.99876	0.149824	0.0272389	0.00067765	13.0682	2.99	2.09167	-0.505119	0.237039	0.0200448	0.0266592	13.0335	0.0346569
0.99992	0.152021	0.0272013	0.000670684	13.0526	2.99	2.09167	1.89419	0.237396	0.308244	0.0265402	13.0181	0.0345023
1.00108	0.150263	0.0271651	0.000669817	13.0353	2.99	2.09167	-1.51536	0.237007	-0.335135	0.0260636	13.0014	0.0338827
1.00224	0.150996	0.0271379	0.000678897	13.0182	2.99	2.09167	0.631398	0.237408	0.345354	0.0260456	12.9844	0.0338592
1.0034	0.151435	0.0271226	0.000691879	13.0053	2.99	2.09167	0.378839	0.237631	0.192358	0.0256221	12.972	0.0333088
1.00456	0.152168	0.0270959	0.000691449	12.9925	2.99	2.09167	0.631398	0.237791	0.137522	0.0249871	12.96	0.0324832
1.00572	0.152314	0.0270626	0.00068448	12.979	2.99	2.09167	0.12628	0.237773	-0.0153259	0.0242092	12.9475	0.0314719
1.00688	0.152607	0.0270306	0.000677567	12.9662	2.99	2.09167	0.252559	0.237805	0.0279698	0.0234814	12.9357	0.0305258
1.00804	0.1529	0.0269983	0.00067483	12.9515	2.99	2.09167	0.252559	0.237831	0.0222405	0.022748	12.9219	0.0295724
1.0092	0.154219	0.0269733	0.000681218	12.9366	2.99	2.09167	1.13652	0.23785	0.0165216	0.0220152	12.908	0.0286198
1.01036	0.153486	0.0269592	0.000699484	12.9222	2.99	2.09167	-0.631398	0.237465	-0.332455	0.0212894	12.8945	0.0276762
1.01152	0.153633	0.0269335	0.000704615	12.9075	2.99	2.09167	0.12628	0.23747	0.00494741	0.0210126	12.8801	0.0273164
1.01268	0.153926	0.0268961	0.000696339	12.8925	2.99	2.09167	0.252559	0.237526	0.0481259	0.0207563	12.8655	0.0269831
1.01384	0.154219	0.0268591	0.000686749	12.8783	2.99	2.09167	0.252559	0.237575	0.0422888	0.0204651	12.8517	0.0266047
1.015	0.154365	0.026823	0.000680241	12.8634	2.99	2.09167	0.12628	0.237618	0.0364698	0.0201463	12.8372	0.0261902
1.01616	0.154951	0.0267929	0.000682036	12.8478	2.99	2.09167	0.505119	0.23771	0.0797052	0.0198068	12.8221	0.0257488
1.01732	0.155244	0.0267724	0.000695158	12.8324	2.99	2.09167	0.252559	0.237682	-0.0241371	0.0193912	12.8072	0.0252086
1.01848	0.156269	0.0267488	0.000698718	12.8194	2.99	2.09167	0.883957	0.237647	-0.0299138	0.0190309	12.7946	0.0247402
1.01964	0.154511	0.0267136	0.000688868	12.8062	2.99	2.09167	-1.51536	0.237321	-0.280894	0.0187327	12.7819	0.0243525
1.0208	0.156416	0.0266786	0.000677152	12.7938	2.99	2.09167	1.64164	0.237785	0.399718	0.0188149	12.7694	0.0244594
1.02196	0.156269	0.0266457	0.000667962	12.7815	2.99	2.09167	-0.12628	0.237616	-0.145434	0.0184135	12.7576	0.0239376
1.02312	0.156855	0.0266168	0.000666795	12.7678	2.99	2.09167	0.505119	0.237612	-0.00412414	0.0182202	12.7442	0.0236862
1.02428	0.155537	0.0265964	0.000676674	12.7538	2.99	2.09167	-1.13652	0.237486	-0.108004	0.0180552	12.7303	0.0234717
1.02544	0.15539	0.0265771	0.000686055	12.7405	2.99	2.09167	-0.12628	0.23798	0.425559	0.0180502	12.717	0.0234652
1.0266	0.157441	0.0265468	0.00068202	12.7273	2.99	2.09167	1.76791	0.238638	0.56701	0.0175279	12.7045	0.0227863
1.02776	0.157588	0.0265148	0.000675017	12.7145	2.99	2.09167	0.12628	0.238607	-0.02685	0.0163081	12.6933	0.0212005
1.02892	0.157734	0.0264858	0.000669164	12.7027	2.99	2.09167	0.12628	0.238626	0.0167707	0.0151431	12.683	0.019686
1.03008	0.158467	0.026459	0.00066941	12.6894	2.99	2.09167	0.631398	0.238696	0.0603974	0.013976	12.6713	0.0181688
1.03124	0.158467	0.0264409	0.000679603	12.6764	2.99	2.09167	0	0.238589	-0.0921	0.01275	12.6598	0.0165749
1.0324	0.15876	0.0264228	0.000689849	12.6633	2.99	2.09167	0.252559	0.23859	0.000550862	0.011657	12.6481	0.0151541
1.03356	0.15876	0.0263933	0.000686957	12.65	2.99	2.09167	0	0.238584	-0.00487328	0.0105782	12.6363	0.0137517
1.03472	0.159492	0.0263593	0.000679174	12.6366	2.99	2.09167	0.631398	0.238686	0.087775	0.009519	12.6242	0.0123747
1.03588	0.159345	0.0263283	0.000671718	12.6244	2.99	2.09167	-0.12628	0.238611	-0.064725	0.00836045	12.6136	0.0108686
1.03704	0.160078	0.0263004	0.000668712	12.612	2.99	2.09167	0.631398	0.2387	0.0769707	0.00729468	12.6025	0.00948309
1.0382	0.160664	0.0262815	0.000675103	12.6001	2.99	2.09167	0.505119	0.238613	-0.0755233	0.00614046	12.5921	0.0079826
1.03936	0.160371	0.0262622	0.000682096	12.5878	2.99	2.09167	-0.252559	0.238405	-0.179016	0.00508991	12.5812	0.00661688
1.04052	0.159785	0.0262331	0.000676771	12.5757	2.99	2.09167	-0.505119	0.238419	0.0116397	0.00427307	12.5702	0.00555499
1.04168	0.160957	0.0261967	0.000661877	12.564	2.99	2.09167	1.01024	0.238767	0.300375	0.00344687	12.5595	0.00448093
1.04284	0.159492	0.026162	0.000646478	12.5534	2.99	2.09167	-1.2628	0.238768	0.000792241	0.00224375	12.5505	0.00291687
1.044	0.161836	0.0261316	0.000634417	12.5434	2.99	2.09167	2.02047	0.239445	0.583891	0.00104246	12.5421	0.0013552
1.04516	0.161982	0.0261067	0.000630913	12.5327	2.99	2.09167	0.12628	0.23932	-0.107731	-0.000898704	12.5338	-0.00116832
1.04632	0.161836	0.0260838	0.000628265	12.5226	2.99	2.09167	-0.12628	0.239246	-0.0638353	-0.00270426	12.5261	-0.00351553
1.04748	0.162275	0.0260621	0.000625923	12.5129	2.99	2.09167	0.378839	0.239337	0.0781095	-0.00443221	12.5186	-0.00576187
1.04864	0.162715	0.0260322	0.000612889	12.5036	2.99	2.09167	0.378839	0.239365	0.0239362	-0.00626494	12.5117	-0.00814442
1.0498	0.162275	0.0260014	0.000597953	12.4946	2.99	2.09167	-0.378839	0.239329	-0.030225	-0.008136	12.5052	-0.0105768
1.05096	0.163154	0.0259757	0.000585509	12.4871	2.99	2.09167	0.757678	0.239573	0.209826	-0.00997903	12.5001	-0.0129727
1.05212	0.163594	0.0259537	0.000580225	12.4786	2.99	2.09167	0.378839	0.239583	0.00863276	-0.0121011	12.4943	-0.0157314
1.05328	0.164472	0.025942	0.000585673	12.4706	2.99	2.09167	0.757678	0.23953	-0.0454448	-0.0142495	12.4891	-0.0185243
1.05444	0.164619	0.0259299	0.000591682	12.4622	2.99	2.09167	0.12628	0.239244	-0.246656	-0.0163582	12.4835	-0.0212657
1.0556	0.164179	0.0259066	0.000586432	12.4529	2.99	2.09167	-0.378839	0.239009	-0.202788	-0.0181747	12.4765	-0.0236271
1.05676	0.164619	0.0258794	0.000576521	12.4437	2.99	2.09167	0.378839	0.239052	0.0371379	-0.0197567	12.4693	-0.0256838
1.05792	0.164912	0.0258562	0.000567992	12.4358	2.99	2.09167	0.252559	0.239032	-0.017144	-0.021411	12.4637	-0.0278344
1.05908	0.165058	0.0258374	0.000566064	12.4274	2.99	2.09167	0.12628	0.239006	-0.0223974	-0.0230708	12.4574	-0.029992
1.06024	0.165351	0.0258274	0.000574313	12.4191	2.99	2.09167	0.252559	0.239031	0.0213776	-0.0247313	12.4512	-0.0321507
1.0614	0.165498	0.025817	0.000582842	12.4105	2.99	2.09167	0.12628	0.23905	0.0161233	-0.0264504	12.4449	-0.0343856
1.06256	0.166963	0.0258002	0.000580384	12.4033	2.99	2.09167	1.2628	0.239119	0.0599155	-0.0282236	12.44	-0.0366906
1.06372	0.167842	0.0257779	0.000569413	12.3968	2.99	2.09167	0.757678	0.238727	-0.337606	-0.0301086	12.436	-0.0391412
1.06488	0.16667	0.0257568	0.00055872	12.3909	2.99	2.09167	-1.01024	0.238102	-0.539128	-0.0316033	12.432	-0.0410843
1.06604	0.165937	0.0257408	0.000552701	12.3856	2.99	2.09167	-0.631398	0.238039	-0.0543655	-0.0324537	12.4278	-0.0421898
1.0672	0.167549	0.0257311	0.000555202	12.3798	2.99	2.09167	1.38908	0.238368	0.283262	-0.0332763	12.423	-0.0432592
1.06836	0.168135	0.0257155	0.000548902	12.3747	2.99	2.09167	0.505119	0.238178	-0.163591	-0.0345007	12.4196	-0.044851
1.06952	0.168135	0.0257006	0.000541773	12.3704	2.99	2.09167	0	0.237868	-0.26725	-0.0355613	12.4166	-0.0462297
1.07068	0.168281	0.0256914	0.000537934	12.3674	2.99	2.09167	0.12628	0.237665	-0.17488	-0.0363277	12.4146	-0.0472261
1.07184	0.168427	0.0256858	0.000541784	12.3631	2.99	2.09167	0.12628	0.237512	-0.131626	-0.0369183	12.4111	-0.0479938
1.073	0.167549	0.0256788	0.000545076	12.3583	2.99	2.09167	-0.757678	0.23741	-0.088431	-0.0373886	12.4069	-0.0486052
1.07416	0.16872	0.0256719	0.000548636	12.3535	2.99	2.09167	1.01024	0.237755	0.297988	-0.0377942	12.4026	-0.0491324
1.07532	0.169599	0.0256577	0.000543392	12.3487	2.99	2.09167	0.757678	0.237753	-0.00198707	-0.038626	12.3989	-0.0502138
1.07648	0.169453	0.0256396	0.000530718	12.345	2.99	2.09167	-0.12628	0.237517	-0.203889	-0.0395043	12.3964	-0.0513556
1.07764	0.170039	0.025626	0.000519955	12.3428	2.99	2.09167	0.505119	0.237444	-0.0626164	-0.0401739	12.395	-0.0522261
1.0788	0.170039	0.0256171	0.000515498	12.3403	2.99	2.09167	0	0.237251	-0.166561	-0.040815	12.3933	-0.0530596
1.07996	0.170478	0.0256056	0.000509921	12.3369	2.99	2.09167	0.378839	0.237164	-0.074431	-0.0412966	12.3906	-0.0536855
1.08112	0.171504	0.0255932	0.000504596	12.333	2.99	2.09167	0.883957	0.237014	-0.129447	-0.041736	12.3873	-0.0542568
1.08228	0.170918	0.0255855	0.00050337	12.3297	2.99	2.09167	-0.505119	0.236573	-0.380672	-0.0420641	12.3844	-0.0546834
1.08344	0.171357	0.0255727	0.000493871	12.3274	2.99	2.09167	0.378839	0.236465	-0.0926534	-0.0419624	12.3819	-0.0545511
1.0846	0.171357	0.025563	0.000485167	12.3262	2.99	2.09167	0	0.236293	-0.147942	-0.0417963	12.3805	-0.0543352
1.08576	0.170185	0.0255597	0.000481652	12.3261	2.99	2.09167	-1.01024	0.236228	-0.0561819	-0.0414955	12.38	-0.0539441
1.08692	0.171797	0.0255612	0.000480577	12.3272	2.99	2.09167	1.38908	0.236725	0.427854	-0.041176	12.3808	-0.0535288
1.08808	0.172676	0.0255614	0.000479191	12.3279	2.99	2.09167	0.757678	0.236702	-0.0196353	-0.0414519	12.3818	-0.0538875
1.08924	0.172529	0.0255622	0.000480243	12.3279	2.99	2.09167	-0.12628	0.236444	-0.221944	-0.0417556	12.3822	-0.0542822
1.0904	0.172822	0.0255582	0.000473561	12.3287	2.99	2.09167	0.252559	0.23635	-0.0810888	-0.0418305	12.383	-0.0543796
1.09156	0.171943	0.0255557	0.00046629	12.3304	2.99	2.09167	-0.757678	0.236249	-0.0873836	-0.0418555	12.3848	-0.0544122
1.09272	0.173115	0.0255598	0.000463101	12.3337	2.99	2.09167	1.01024	0.236595	0.298586	-0.0418228	12.3881	-0.0543696
1.09388	0.173408	0.025561	0.000458493	12.3362	2.99	2.09167	0.252559	0.236593	-0.00184052	-0.0422222	12.3911	-0.0548888
1.09504	0.173847	0.0255609	0.00045439	12.3379	2.99	2.09167	0.378839	0.236584	-0.00804052	-0.0426728	12.3933	-0.0554747
1.0962	0.173994	0.0255675	0.000450789	12.3426	2.99	2.09167	0.12628	0.23651	-0.0632819	-0.0431674	12.3987	-0.0561177
1.09736	0.174287	0.0255706	0.000439715	12.3487	2.99	2.09167	0.252559	0.236487	-0.0204759	-0.0436365	12.4054	-0.0567275
1.09852	0.174433	0.0255777	0.000430237	12.356	2.99	2.09167	0.12628	0.236456	-0.0267181	-0.044135	12.4134	-0.0573755
1.09968	0.174873	0.0255917	0.000426198	12.3646	2.99	2.09167	0.378839	0.236474	0.0160664	-0.0446556	12.4226	-0.0580522
1.10084	0.175312	0.0256009	0.000420176	12.3715	2.99	2.09167	0.378839	0.236429	-0.0392172	-0.0452532	12.4304	-0.0588292
1.102	0.175459	0.0256094	0.000413815	12.3783	2.99	2.09167	0.12628	0.236319	-0.094519	-0.0458586	12.4379	-0.0596161
1.10316	0.175605	0.0256226	0.000411787	12.3856	2.99	2.09167	0.12628	0.236259	-0.0517879	-0.0464021	12.446	-0.0603228
1.10432	0.175898	0.0256321	0.000403094	12.3939	2.99	2.09167	0.252559	0.236249	-0.00907931	-0.0469389	12.4549	-0.0610205
1.10548	0.176191	0.0256467	0.000397354	12.4034	2.99	2.09167	0.252559	0.236231	-0.0154138	-0.0475236	12.4652	-0.0617807
1.10664	0.175898	0.0256675	0.00039814	12.4132	2.99	2.09167	-0.252559	0.236206	-0.0217543	-0.0481492	12.4758	-0.0625939
1.1078	0.176631	0.0256859	0.000398028	12.4223	2.99	2.09167	0.631398	0.2364	0.168047	-0.0488082	12.4858	-0.0634507
1.10896	0.178095	0.025707	0.000401417	12.4312	2.99	2.09167	1.2628	0.236417	0.0146578	-0.0497426	12.4959	-0.0646653
1.11012	0.17751	0.025723	0.000397037	12.4409	2.99	2.09167	-0.505119	0.235972	-0.383913	-0.0507587	12.5069	-0.0659863
1.11128	0.178828	0.0257361	0.000387634	12.4512	2.99	2.09167	1.13652	0.235861	-0.0961276	-0.0513518	12.5179	-0.0667574
1.11244	0.179267	0.0257566	0.000382002	12.4635	2.99	2.09167	0.378839	0.235343	-0.445876	-0.0518882	12.531	-0.0674546
1.1136	0.17956	0.0257744	0.000373541	12.4758	2.99	2.09167	0.252559	0.234762	-0.5016	-0.0519244	12.5433	-0.0675017
1.11476	0.178388	0.0257878	0.000363622	12.4864	2.99	2.09167	-1.01024	0.234172	-0.508511	-0.0513897	12.5532	-0.0668066
1.11592	0.178535	0.0258036	0.000357188	12.4968	2.99	2.09167	0.12628	0.234142	-0.0252733	-0.0502748	12.5621	-0.0653572
1.11708	0.178828	0.0258275	0.000352862	12.5103	2.99	2.09167	0.252559	0.234162	0.0166121	-0.0491916	12.5742	-0.0639491
1.11824	0.179121	0.0258523	0.000347892	12.5244	2.99	2.09167	0.252559	0.234173	0.00946897	-0.0481919	12.5871	-0.0626495
1.1194	0.179414	0.0258849	0.000347502	12.5406	2.99	2.09167	0.252559	0.234175	0.00232845	-0.0472655	12.602	-0.0614451
1.12056	0.18	0.0259109	0.000344816	12.5544	2.99	2.09167	0.505119	0.23417	-0.00481121	-0.046402	12.6148	-0.0603226
1.12172	0.18	0.0259368	0.000344507	12.5673	2.99	2.09167	0	0.234042	-0.110028	-0.0455913	12.6266	-0.0592687
1.12288	0.17707	0.0259702	0.0003507	12.5811	2.99	2.09167	-2.52559	0.23402	-0.0191422	-0.0446988	12.6392	-0.0581084
1.12404	0.180732	0.0260011	0.00035075	12.5962	2.99	2.09167	3.15699	0.235241	1.05249	-0.0438387	12.6532	-0.0569903
1.1252	0.180732	0.0260367	0.00035318	12.6126	2.99	2.09167	0	0.235146	-0.0821052	-0.0443704	12.6703	-0.0576815
1.12636	0.181465	0.02608	0.000361015	12.6306	2.99	2.09167	0.631398	0.235156	0.00920862	-0.0448541	12.6889	-0.0583104
1.12752	0.181904	0.0261283	0.000374535	12.6487	2.99	2.09167	0.378839	0.234988	-0.144664	-0.0454065	12.7078	-0.0590284
1.12868	0.182197	0.0261734	0.000382472	12.6676	2.99	2.09167	0.252559	0.234756	-0.200524	-0.0458329	12.7271	-0.0595827
1.12984	0.178242	0.0262169	0.000386206	12.6874	2.99	2.09167	-3.40955	0.234515	-0.207438	-0.0460629	12.7472	-0.0598818
1.131	0.182636	0.0262671	0.00039371	12.7089	2.99	2.09167	3.78839	0.235916	1.20765	-0.046088	12.7688	-0.0599145
1.13216	0.181025	0.0263098	0.000397565	12.7282	2.99	2.09167	-1.38908	0.235717	-0.17187	-0.0477047	12.7902	-0.0620162
1.13332	0.182929	0.0263474	0.000399972	12.7456	2.99	2.09167	1.64164	0.236249	0.459081	-0.0491638	12.8095	-0.063913
1.13448	0.183076	0.0263882	0.000407255	12.7626	2.99	2.09167	0.12628	0.236149	-0.086669	-0.0512681	12.8293	-0.0666485
1.13564	0.183369	0.0264374	0.000421894	12.7807	2.99	2.09167	0.252559	0.236098	-0.0440034	-0.0533274	12.85	-0.0693256
1.1368	0.183515	0.0264852	0.000432071	12.7999	2.99	2.09167	0.12628	0.236039	-0.0503957	-0.0553985	12.872	-0.0720181
1.13796	0.183955	0.0265384	0.000445214	12.8206	2.99	2.09167	0.378839	0.23603	-0.00777328	-0.057476	12.8953	-0.0747188
1.13912	0.184541	0.0265867	0.000453357	12.8409	2.99	2.09167	0.505119	0.235957	-0.0632293	-0.0596166	12.9184	-0.0775016
1.14028	0.18498	0.0266437	0.000462277	12.8652	2.99	2.09167	0.378839	0.235762	-0.167753	-0.0617526	12.9455	-0.0802784
1.14144	0.185713	0.0266995	0.000466754	12.8907	2.99	2.09167	0.631398	0.235503	-0.223314	-0.0637541	12.9735	-0.0828803
1.1426	0.186152	0.0267484	0.00046679	12.9146	2.99	2.09167	0.378839	0.235066	-0.37705	-0.065553	12.9998	-0.0852189
1.14376	0.185713	0.0267905	0.000465134	12.9359	2.99	2.09167	-0.378839	0.234564	-0.432881	-0.0669565	13.023	-0.0870434
1.14492	0.186299	0.0268357	0.000469209	12.9564	2.99	2.09167	0.505119	0.234338	-0.19468	-0.0678954	13.0447	-0.0882641
1.14608	0.186299	0.0268893	0.000481491	12.9776	2.99	2.09167	0	0.23399	-0.299831	-0.0686734	13.0669	-0.0892755
1.14724	0.188642	0.0269413	0.000489064	13	2.99	2.09167	2.02047	0.233748	-0.208967	-0.069158	13.0899	-0.0899054
1.1484	0.185127	0.0269985	0.000499904	13.0236	2.99	2.09167	-3.03071	0.2327	-0.902802	-0.0694651	13.1139	-0.0903047
1.14956	0.187177	0.0270523	0.000505493	13.0476	2.99	2.09167	1.76791	0.233123	0.36447	-0.0687144	13.1369	-0.0893287
1.15072	0.187324	0.0270967	0.000508583	13.0681	2.99	2.09167	0.12628	0.232855	-0.231531	-0.0685135	13.1572	-0.0890675
1.15188	0.187324	0.0271429	0.000516049	13.0877	2.99	2.09167	0	0.232634	-0.190146	-0.0681057	13.1762	-0.0885374
1.15304	0.187763	0.0271963	0.000531193	13.1076	2.99	2.09167	0.378839	0.232518	-0.0998069	-0.067543	13.1954	-0.0878059
1.1542	0.188935	0.0272475	0.000541651	13.1284	2.99	2.09167	1.01024	0.232337	-0.156628	-0.0669393	13.2154	-0.0870211
1.15536	0.188056	0.0272971	0.00055155	13.1486	2.99	2.09167	-0.757678	0.231804	-0.458708	-0.0662218	13.2347	-0.0860883
1.15652	0.188789	0.0273429	0.000555397	13.1695	2.99	2.09167	0.631398	0.231718	-0.0744647	-0.065006	13.254	-0.0845078
1.15768	0.188789	0.0273793	0.000555942	13.1871	2.99	2.09167	0	0.231452	-0.229672	-0.0637782	13.27	-0.0829117
1.15884	0.189082	0.0274154	0.00056006	13.2031	2.99	2.09167	0.252559	0.231289	-0.139793	-0.0623398	13.2841	-0.0810418
1.16	0.189228	0.0274567	0.000571326	13.2187	2.99	2.09167	0.12628	0.231118	-0.148052	-0.0608032	13.2977	-0.0790441
1.16116	0.189814	0.0274968	0.000578473	13.2354	2.99	2.09167	0.505119	0.230993	-0.107341	-0.0591557	13.3123	-0.0769024
1.16232	0.189082	0.0275356	0.000582604	13.2527	2.99	2.09167	-0.631398	0.230745	-0.213791	-0.0574471	13.3274	-0.0746812
1.16348	0.190107	0.0275703	0.000580696	13.2705	2.99	2.09167	0.883957	0.230886	0.121003	-0.05554	13.3427	-0.072202
1.16464	0.190547	0.0275954	0.000576599	13.2845	2.99	2.09167	0.378839	0.230732	-0.132603	-0.0538571	13.3545	-0.0700142
1.1658	0.190547	0.0276232	0.000577457	13.2978	2.99	2.09167	0	0.230511	-0.190117	-0.0520741	13.3654	-0.0676964
1.16696	0.19084	0.0276578	0.000586297	13.3111	2.99	2.09167	0.252559	0.230395	-0.100603	-0.050116	13.3762	-0.0651507
1.16812	0.191279	0.0276907	0.000591025	13.3252	2.99	2.09167	0.378839	0.230268	-0.10921	-0.0480937	13.3878	-0.0625218
1.16928	0.191279	0.0277227	0.000592742	13.3402	2.99	2.09167	0	0.230074	-0.166904	-0.0459939	13.4	-0.059792
1.17044	0.191719	0.0277506	0.0005876	13.356	2.99	2.09167	0.378839	0.229984	-0.0775603	-0.0437405	13.4128	-0.0568627
1.1716	0.191865	0.0277696	0.000578896	13.3689	2.99	2.09167	0.12628	0.229827	-0.135365	-0.0414443	13.4228	-0.0538776
1.17276	0.192304	0.0277881	0.0005746	13.3797	2.99	2.09167	0.378839	0.229717	-0.0951543	-0.0390288	13.4304	-0.0507374
1.17392	0.192451	0.0278126	0.000578284	13.3902	2.99	2.09167	0.12628	0.229539	-0.153062	-0.0365421	13.4377	-0.0475047
1.17508	0.192451	0.0278357	0.000578402	13.4015	2.99	2.09167	0	0.229408	-0.112964	-0.0339074	13.4456	-0.0440796
1.17624	0.193037	0.027858	0.000575504	13.4136	2.99	2.09167	0.505119	0.229381	-0.0238784	-0.0311724	13.4541	-0.0405241
1.1774	0.19289	0.027876	0.000566289	13.4262	2.99	2.09167	-0.12628	0.229229	-0.130955	-0.0284467	13.4632	-0.0369807
1.17856	0.192744	0.0278863	0.000553227	13.4366	2.99	2.09167	-0.12628	0.229237	0.00709828	-0.0255908	13.4699	-0.033268
1.17972	0.192304	0.0278952	0.000544012	13.4448	2.99	2.09167	-0.378839	0.229405	0.145156	-0.0227764	13.4744	-0.0296093
1.18088	0.193623	0.0279097	0.000542488	13.4525	2.99	2.09167	1.13652	0.229848	0.381353	-0.0201752	13.4787	-0.0262278
1.18204	0.194062	0.0279344	0.000550854	13.4612	2.99	2.09167	0.378839	0.229882	0.029269	-0.0180837	13.4847	-0.0235089
1.1832	0.194355	0.0279584	0.000555641	13.4709	2.99	2.09167	0.252559	0.229848	-0.028575	-0.0160524	13.4918	-0.0208681
1.18436	0.19582	0.0279766	0.000553278	13.4809	2.99	2.09167	1.2628	0.229805	-0.0373948	-0.0140051	13.4991	-0.0182066
1.18552	0.19333	0.0279891	0.000546513	13.4898	2.99	2.09167	-2.14675	0.229296	-0.438533	-0.0119281	13.5053	-0.0155066
1.18668	0.195088	0.0279971	0.000541941	13.4956	2.99	2.09167	1.51536	0.229858	0.484152	-0.00930963	13.5077	-0.0121025
1.18784	0.195234	0.028009	0.000543685	13.5007	2.99	2.09167	0.12628	0.229841	-0.0150422	-0.00731754	13.5102	-0.0095128
1.189	0.19582	0.0280295	0.000555319	13.5059	2.99	2.09167	0.505119	0.22987	0.0251741	-0.00531564	13.5129	-0.00691033
1.19016	0.19582	0.0280485	0.000563926	13.5117	2.99	2.09167	0	0.229775	-0.0817138	-0.00335244	13.516	-0.00435818
1.19132	0.19626	0.0280552	0.000562363	13.5156	2.99	2.09167	0.378839	0.229784	0.00751552	-0.00128978	13.5173	-0.00167671
1.19248	0.196406	0.0280573	0.000555027	13.5197	2.99	2.09167	0.12628	0.229725	-0.0503672	0.000761712	13.5187	0.000990225
1.19364	0.196699	0.0280543	0.000548513	13.5209	2.99	2.09167	0.252559	0.229713	-0.0101974	0.00287811	13.5172	0.00374154
1.1948	0.197431	0.028055	0.000548593	13.5212	2.99	2.09167	0.631398	0.229691	-0.0190681	0.0050111	13.5147	0.00651443
1.19596	0.19626	0.0280647	0.000559115	13.5216	2.99	2.09167	-1.01024	0.229488	-0.175062	0.00717466	13.5123	0.00932705
1.19712	0.194502	0.0280739	0.000567163	13.5228	2.99	2.09167	-1.51536	0.229844	0.306358	0.00956955	13.5104	0.0124404
1.19828	0.197871	0.0280744	0.000566415	13.5234	2.99	2.09167	2.90443	0.230985	0.984066	0.0115877	13.5083	0.015064
1.19944	0.198017	0.0280706	0.000559897	13.5242	2.99	2.09167	0.12628	0.230922	-0.0541069	0.0123713	13.5081	0.0160828
1.2006	0.198457	0.0280618	0.000555028	13.5219	2.99	2.09167	0.378839	0.230907	-0.0134707	0.0132394	13.5047	0.0172112
1.20176	0.198457	0.0280558	0.000556206	13.5185	2.99	2.09167	0	0.230824	-0.0709172	0.0141413	13.5001	0.0183837
1.20292	0.198896	0.0280568	0.000566729	13.5146	2.99	2.09167	0.378839	0.230846	0.0187181	0.0151513	13.4949	0.0196966
1.20408	0.199189	0.0280587	0.000575332	13.512	2.99	2.09167	0.252559	0.230801	-0.0387509	0.0161567	13.491	0.0210037
1.20524	0.199336	0.0280492	0.000570744	13.5092	2.99	2.09167	0.12628	0.230746	-0.0472009	0.0172318	13.4868	0.0224013
1.2064	0.199336	0.0280346	0.000559562	13.5067	2.99	2.09167	0	0.230739	-0.00663276	0.0183886	13.4828	0.0239052
1.20756	0.199775	0.0280171	0.000548655	13.5026	2.99	2.09167	0.378839	0.230835	0.082969	0.0195773	13.4771	0.0254505
1.20872	0.200068	0.0279988	0.000542417	13.4962	2.99	2.09167	0.252559	0.230865	0.0254948	0.0206855	13.4693	0.0268911
1.20988	0.200361	0.0279867	0.000544968	13.4892	2.99	2.09167	0.252559	0.230884	0.0170707	0.0217876	13.4609	0.0283238
1.21104	0.200654	0.0279848	0.000558236	13.4828	2.99	2.09167	0.252559	0.230894	0.00865345	0.0228956	13.4531	0.0297643
1.2122	0.200801	0.0279728	0.000558581	13.4768	2.99	2.09167	0.12628	0.230895	0.000240517	0.0240218	13.4456	0.0312283
1.21336	0.201094	0.0279546	0.000551777	13.4707	2.99	2.09167	0.252559	0.230942	0.0408655	0.0251781	13.438	0.0327315
1.21452	0.201386	0.0279349	0.000543594	13.4644	2.99	2.09167	0.252559	0.23098	0.0324707	0.0263145	13.4302	0.0342089
1.21568	0.202119	0.0279115	0.000538703	13.455	2.99	2.09167	0.631398	0.231008	0.0240905	0.0274431	13.4193	0.0356761
1.21684	0.203877	0.0278938	0.000541776	13.445	2.99	2.09167	1.51536	0.230855	-0.131391	0.028576	13.4079	0.0371488
1.218	0.201386	0.0278846	0.000557212	13.4342	2.99	2.09167	-2.14675	0.230124	-0.630198	0.0299119	13.3953	0.0388855
1.21916	0.203584	0.0278744	0.000563025	13.4267	2.99	2.09167	1.89419	0.230464	0.292809	0.0320858	13.385	0.0417115
1.22032	0.202851	0.0278518	0.000556741	13.4183	2.99	2.09167	-0.631398	0.230054	-0.353264	0.0339287	13.3742	0.0441073
1.22148	0.203291	0.0278245	0.000546882	13.409	2.99	2.09167	0.378839	0.230032	-0.0187379	0.0362631	13.3618	0.0471421
1.22264	0.203437	0.0277945	0.000539491	13.3973	2.99	2.09167	0.12628	0.229944	-0.0765233	0.0386674	13.347	0.0502676
1.2238	0.201386	0.0277676	0.00053814	13.3847	2.99	2.09167	-1.76791	0.229902	-0.0362681	0.0412179	13.3311	0.0535832
1.22496	0.20417	0.0277486	0.000546952	13.3717	2.99	2.09167	2.39931	0.230759	0.739538	0.0438667	13.3147	0.0570267
1.22612	0.206953	0.0277416	0.000557682	13.3639	2.99	2.09167	2.39931	0.23064	-0.10257	0.0456325	13.3046	0.0593222
1.22728	0.202998	0.0277237	0.000554939	13.3562	2.99	2.09167	-3.40955	0.229545	-0.944725	0.0475863	13.2944	0.0618622
1.22844	0.20417	0.0277002	0.00054532	13.3487	2.99	2.09167	1.01024	0.230088	0.468435	0.0507999	13.2826	0.0660398
1.2296	0.202265	0.0276772	0.000536245	13.3412	2.99	2.09167	-1.64164	0.23028	0.165482	0.0534833	13.2716	0.0695282
1.23076	0.204902	0.027655	0.000532658	13.3317	2.99	2.09167	2.27303	0.231315	0.892397	0.0560245	13.2589	0.0728318
1.23192	0.202265	0.0276401	0.000538406	13.3221	2.99	2.09167	-2.27303	0.231431	0.0995431	0.057504	13.2473	0.0747551
1.23308	0.205488	0.027637	0.000555692	13.3134	2.99	2.09167	2.77815	0.232674	1.07209	0.0589301	13.2368	0.0766091
1.23424	0.205781	0.0276225	0.000559503	13.3048	2.99	2.09167	0.252559	0.232771	0.0836155	0.0590701	13.228	0.0767911
1.2354	0.20622	0.0276014	0.000555342	13.2961	2.99	2.09167	0.378839	0.232859	0.0759319	0.0591789	13.2192	0.0769326
1.23656	0.206367	0.0275807	0.000550628	13.2879	2.99	2.09167	0.12628	0.232882	0.019244	0.0592664	13.2109	0.0770464
1.23772	0.206367	0.0275602	0.000550584	13.2779	2.99	2.09167	0	0.232952	0.0606405	0.0594048	13.2007	0.0772263
1.23888	0.206953	0.027547	0.000559059	13.268	2.99	2.09167	0.505119	0.233127	0.151102	0.0595416	13.1906	0.0774041
1.24004	0.207246	0.0275441	0.000578806	13.2584	2.99	2.09167	0.252559	0.23318	0.0454802	0.0595622	13.181	0.0774308
1.2412	0.207539	0.0275299	0.00058509	13.2489	2.99	2.09167	0.252559	0.233224	0.0379543	0.0596006	13.1714	0.0774808
1.24236	0.207832	0.0275037	0.000578737	13.2386	2.99	2.09167	0.252559	0.233259	0.0304466	0.0596665	13.1611	0.0775665
1.24352	0.207978	0.0274773	0.000570743	13.229	2.99	2.09167	0.12628	0.233286	0.0229517	0.0597695	13.1513	0.0777004
1.24468	0.207978	0.0274511	0.000565229	13.2185	2.99	2.09167	0	0.233361	0.0645052	0.0599193	13.1406	0.0778951
1.24584	0.208857	0.0274305	0.00056714	13.2076	2.99	2.09167	0.757678	0.233541	0.155125	0.0600632	13.1295	0.0780822
1.247	0.208418	0.0274191	0.000580327	13.1966	2.99	2.09167	-0.378839	0.233485	-0.0484112	0.0600865	13.1185	0.0781124
1.24816	0.209297	0.0274092	0.000587199	13.1889	2.99	2.09167	0.757678	0.233704	0.189371	0.0602475	13.1105	0.0783217
1.24932	0.208857	0.0273884	0.000580887	13.1813	2.99	2.09167	-0.378839	0.233688	-0.0141026	0.0602445	13.1029	0.0783179
1.25048	0.209736	0.027366	0.000571284	13.1742	2.99	2.09167	0.757678	0.233947	0.223758	0.060336	13.0958	0.0784368
1.25164	0.209883	0.0273453	0.000563337	13.1674	2.99	2.09167	0.12628	0.233971	0.0203802	0.06022	13.0891	0.078286
1.2528	0.209004	0.0273266	0.000561714	13.1589	2.99	2.09167	-0.757678	0.234043	0.0621983	0.0601546	13.0807	0.0782009
1.25396	0.210469	0.0273171	0.00057054	13.1506	2.99	2.09167	1.2628	0.234562	0.447311	0.0600865	13.0725	0.0781125
1.25512	0.21164	0.0273112	0.00058102	13.1434	2.99	2.09167	1.01024	0.234618	0.0480207	0.059527	13.066	0.0773851
1.25628	0.208564	0.0272932	0.000578037	13.1358	2.99	2.09167	-2.65187	0.234324	-0.253175	0.058982	13.0591	0.0766766
1.25744	0.21208	0.0272706	0.000570114	13.128	2.99	2.09167	3.03071	0.235331	0.867615	0.0588333	13.0515	0.0764833
1.2586	0.212666	0.0272506	0.00056192	13.1215	2.99	2.09167	0.505119	0.235078	-0.217908	0.0576579	13.0466	0.0749553
1.25976	0.211933	0.0272308	0.000559226	13.113	2.99	2.09167	-0.631398	0.234703	-0.322772	0.0568323	13.0391	0.073882
1.26092	0.211933	0.0272187	0.00056588	13.1043	2.99	2.09167	0	0.234719	0.0135595	0.0564886	13.0309	0.0734352
1.26208	0.212959	0.0272174	0.000584908	13.0958	2.99	2.09167	0.883957	0.234841	0.104706	0.0561994	13.0228	0.0730592
1.26324	0.212666	0.0272051	0.000591026	13.0873	2.99	2.09167	-0.252559	0.23467	-0.147363	0.0558486	13.0147	0.0726032
1.2644	0.212959	0.0271813	0.00058341	13.0787	2.99	2.09167	0.252559	0.234718	0.0418405	0.0557558	13.0063	0.0724825
1.26556	0.213398	0.0271585	0.00057498	13.0711	2.99	2.09167	0.378839	0.234759	0.0349129	0.0556806	12.9987	0.0723848
1.26672	0.212666	0.0271377	0.000570406	13.0627	2.99	2.09167	-0.631398	0.234734	-0.0210371	0.0556318	12.9904	0.0723214
1.26788	0.213838	0.0271228	0.000573535	13.0542	2.99	2.09167	1.01024	0.2351	0.315305	0.0556803	12.9818	0.0723844
1.26904	0.213984	0.0271179	0.000588217	13.0457	2.99	2.09167	0.12628	0.235117	0.0142983	0.0553993	12.9737	0.0720191
1.2702	0.214424	0.0271146	0.000596589	13.0406	2.99	2.09167	0.378839	0.235182	0.0565629	0.0551704	12.9689	0.0717215
1.27136	0.214424	0.0270999	0.000591504	13.0355	2.99	2.09167	0	0.235183	0.000777586	0.0549398	12.9641	0.0714217
1.27252	0.21501	0.0270844	0.000584235	13.0309	2.99	2.09167	0.505119	0.23529	0.0921052	0.0547779	12.9597	0.0712113
1.27368	0.215742	0.0270719	0.000579176	13.0269	2.99	2.09167	0.631398	0.235275	-0.0126767	0.0545686	12.9559	0.0709392
1.27484	0.215449	0.0270628	0.000581549	13.0215	2.99	2.09167	-0.252559	0.235082	-0.166503	0.0544447	12.9507	0.0707781
1.276	0.215449	0.0270634	0.000594654	13.0164	2.99	2.09167	0	0.235109	0.0228629	0.0546013	12.9454	0.0709817
1.27716	0.21501	0.0270644	0.000608325	13.0112	2.99	2.09167	-0.378839	0.235241	0.114161	0.0547982	12.94	0.0712376
1.27832	0.216035	0.0270544	0.000607995	13.0065	2.99	2.09167	0.883958	0.23565	0.352625	0.0549197	12.9351	0.0713956
1.27948	0.216621	0.0270416	0.000604113	13.0018	2.99	2.09167	0.505119	0.235767	0.100871	0.0546632	12.9307	0.0710622
1.28064	0.216914	0.0270314	0.00060135	12.9979	2.99	2.09167	0.252559	0.235763	-0.00372672	0.0543482	12.9273	0.0706526
1.2818	0.215449	0.0270234	0.00060438	12.9928	2.99	2.09167	-1.2628	0.235751	-0.0102491	0.0541068	12.9224	0.0703389
1.28296	0.218086	0.0270247	0.000617328	12.9881	2.99	2.09167	2.27303	0.236414	0.571678	0.0539472	12.9179	0.0701313
1.28412	0.215742	0.0270245	0.000630576	12.9825	2.99	2.09167	-2.02047	0.23616	-0.219197	0.0531303	12.9134	0.0690694
1.28528	0.218232	0.0270126	0.000630934	12.9766	2.99	2.09167	2.14675	0.236922	0.657116	0.0526591	12.9081	0.0684569
1.28644	0.218672	0.0269933	0.000621976	12.9708	2.99	2.09167	0.378839	0.236824	-0.084525	0.0514206	12.9039	0.0668468
1.2876	0.218965	0.0269755	0.00061332	12.9656	2.99	2.09167	0.252559	0.236662	-0.139672	0.0503547	12.9002	0.0654611
1.28876	0.218672	0.026961	0.000608813	12.9604	2.99	2.09167	-0.252559	0.236493	-0.145846	0.04953	12.896	0.064389
1.28992	0.219111	0.0269529	0.000612851	12.9547	2.99	2.09167	0.378839	0.236544	0.0440664	0.0489534	12.8911	0.0636394
1.29108	0.219111	0.0269453	0.000617462	12.9491	2.99	2.09167	0	0.236531	-0.0111914	0.0483829	12.8862	0.0628977
1.29224	0.219551	0.0269389	0.000622649	12.9438	2.99	2.09167	0.378839	0.236624	0.0806612	0.047888	12.8816	0.0622544
1.2934	0.220429	0.0269242	0.000617692	12.9387	2.99	2.09167	0.757678	0.236654	0.0254345	0.0473516	12.8771	0.0615571
1.29456	0.220283	0.0269096	0.000610836	12.9344	2.99	2.09167	-0.12628	0.236449	-0.176892	0.046843	12.8735	0.0608959
1.29572	0.21999	0.0268996	0.000606752	12.9311	2.99	2.09167	-0.252559	0.236407	-0.0360362	0.0466184	12.8705	0.0606039
1.29688	0.220869	0.0268927	0.000610113	12.9264	2.99	2.09167	0.757678	0.236585	0.153844	0.0464987	12.8659	0.0604483
1.29804	0.222627	0.0268954	0.00061707	12.9248	2.99	2.09167	1.51536	0.236529	-0.0485112	0.0462427	12.8647	0.0601155
1.2992	0.221308	0.0268981	0.000625428	12.9227	2.99	2.09167	-1.13652	0.235897	-0.545114	0.046107	12.8628	0.0599392
1.30036	0.221601	0.026892	0.000623918	12.9203	2.99	2.09167	0.252559	0.235883	-0.012169	0.0467219	12.8596	0.0607385
1.30152	0.221748	0.0268837	0.000619411	12.9181	2.99	2.09167	0.12628	0.235861	-0.018644	0.0474115	12.8565	0.0616349
1.30268	0.221894	0.0268798	0.000616856	12.9173	2.99	2.09167	0.12628	0.235889	0.0239086	0.0481849	12.8546	0.0626404
1.30384	0.222334	0.0268798	0.000620926	12.9156	2.99	2.09167	0.378839	0.235966	0.0664733	0.0489892	12.8519	0.063686
1.305	0.22248	0.0268888	0.000630521	12.916	2.99	2.09167	0.12628	0.235979	0.0109914	0.0497713	12.8513	0.0647027
1.30616	0.223945	0.0268973	0.000640423	12.9161	2.99	2.09167	1.2628	0.236041	0.0535914	0.0506026	12.8504	0.0657834
1.30732	0.22292	0.0268964	0.000638539	12.9165	2.99	2.09167	-0.883957	0.235641	-0.345127	0.0514301	12.8496	0.0668591
1.30848	0.223506	0.0268898	0.000628167	12.9175	2.99	2.09167	0.505119	0.235744	0.089644	0.052761	12.8489	0.0685893
1.30964	0.223799	0.0268864	0.000618101	12.92	2.99	2.09167	0.252559	0.235727	-0.0149603	0.0540451	12.8497	0.0702586
1.3108	0.224092	0.0268878	0.00061301	12.9228	2.99	2.09167	0.252559	0.235702	-0.0214983	0.0554168	12.8507	0.0720418
1.31196	0.223652	0.0268943	0.00061729	12.9242	2.99	2.09167	-0.378839	0.23567	-0.0280431	0.0568861	12.8502	0.073952
1.31312	0.223799	0.0268992	0.000621322	12.925	2.99	2.09167	0.12628	0.235914	0.210587	0.0584633	12.849	0.0760022
1.31428	0.224092	0.026906	0.000625931	12.9264	2.99	2.09167	0.252559	0.236208	0.25316	0.0598473	12.8486	0.0778015
1.31544	0.224824	0.0269074	0.000622321	12.9286	2.99	2.09167	0.631398	0.236494	0.246811	0.0609859	12.8493	0.0792817
1.3166	0.226289	0.0269101	0.000617915	12.9317	2.99	2.09167	1.2628	0.236602	0.0934595	0.0618887	12.8512	0.0804553
1.31776	0.226728	0.0269181	0.000617108	12.9359	2.99	2.09167	0.378839	0.236248	-0.305041	0.0627513	12.8544	0.0815767
1.31892	0.225703	0.0269299	0.000624301	12.9387	2.99	2.09167	-0.883957	0.23583	-0.360412	0.0640809	12.8554	0.0833051
1.32008	0.226728	0.0269402	0.000630973	12.941	2.99	2.09167	0.883957	0.235917	0.0744328	0.0659493	12.8553	0.0857341
1.32124	0.226435	0.0269498	0.000639051	12.9424	2.99	2.09167	-0.252559	0.235711	-0.17722	0.0678069	12.8543	0.088149
1.3224	0.226435	0.0269532	0.000638642	12.9443	2.99	2.09167	0	0.235726	0.0123888	0.0699756	12.8533	0.0909683
1.32356	0.227021	0.0269568	0.000636069	12.9471	2.99	2.09167	0.505119	0.235846	0.103928	0.0722174	12.8532	0.0938826
1.32472	0.228486	0.0269661	0.000636554	12.9515	2.99	2.09167	1.2628	0.235845	-0.000638793	0.0744189	12.8547	0.0967446
1.32588	0.227314	0.0269786	0.000644223	12.9544	2.99	2.09167	-1.01024	0.235382	-0.399431	0.0767158	12.8547	0.0997305
1.32704	0.2279	0.0269888	0.000650829	12.9567	2.99	2.09167	0.505119	0.23548	0.0842767	0.079617	12.8532	0.103502
1.3282	0.228047	0.026998	0.000657751	12.9584	2.99	2.09167	0.12628	0.235456	-0.020431	0.0825123	12.8511	0.107266
1.32936	0.228193	0.0270017	0.000656194	12.9608	2.99	2.09167	0.12628	0.235482	0.0219647	0.0855384	12.8496	0.1112
1.33052	0.228633	0.0270006	0.000647257	12.964	2.99	2.09167	0.378839	0.235556	0.0643716	0.0886451	12.8487	0.115239
1.33168	0.228926	0.027005	0.000640284	12.969	2.99	2.09167	0.252559	0.235566	0.00873017	0.0917826	12.8496	0.119317
1.33284	0.229218	0.0270142	0.000639396	12.9738	2.99	2.09167	0.252559	0.235569	0.0021319	0.0950256	12.8503	0.123533
1.334	0.229511	0.0270181	0.000636618	12.9769	2.99	2.09167	0.252559	0.235564	-0.00446638	0.0983865	12.849	0.127902
1.33516	0.229511	0.0270205	0.000633876	12.9792	2.99	2.09167	0	0.235551	-0.0110664	0.101878	12.8468	0.132441
1.33632	0.23083	0.0270284	0.000636115	12.9821	2.99	2.09167	1.13652	0.235644	0.0804043	0.105513	12.845	0.137167
1.33748	0.229658	0.0270315	0.000630691	12.9859	2.99	2.09167	-1.01024	0.235332	-0.269428	0.109179	12.844	0.141933
1.33864	0.228486	0.0270387	0.000626397	12.9912	2.99	2.09167	-1.01024	0.23558	0.214259	0.113327	12.8439	0.147325
1.3398	0.226289	0.0270523	0.000627633	12.9974	2.99	2.09167	-1.89419	0.23639	0.698045	0.117346	12.8448	0.15255
1.34096	0.228047	0.0270599	0.000626975	13.0014	2.99	2.09167	1.51536	0.238159	1.52541	0.120628	12.8445	0.156816
1.34212	0.231123	0.0270655	0.000626071	13.0045	2.99	2.09167	2.65187	0.239353	1.02944	0.122127	12.8457	0.158765
1.34328	0.231269	0.0270746	0.000629322	13.0076	2.99	2.09167	0.12628	0.239461	0.0925905	0.122474	12.8484	0.159216
1.34444	0.232148	0.027079	0.00062463	13.0117	2.99	2.09167	0.757678	0.239619	0.136543	0.122859	12.852	0.159716
1.3456	0.232002	0.0270834	0.000618593	13.0163	2.99	2.09167	-0.12628	0.239544	-0.0646336	0.123226	12.8561	0.160194
1.34676	0.232295	0.0270942	0.000616706	13.0224	2.99	2.09167	0.252559	0.239634	0.0774259	0.123832	12.8614	0.160982
1.34792	0.23332	0.0271084	0.000620894	13.0276	2.99	2.09167	0.883957	0.239718	0.072406	0.124497	12.8658	0.161846
1.34908	0.232588	0.0271192	0.000624558	13.0314	2.99	2.09167	-0.631398	0.239512	-0.177769	0.125228	12.8686	0.162797
1.35024	0.234345	0.0271283	0.000629627	13.0338	2.99	2.09167	1.51536	0.239698	0.160429	0.126344	12.8695	0.164247
1.3514	0.23083	0.027133	0.000627304	13.037	2.99	2.09167	-3.03071	0.239309	-0.334944	0.127416	12.8714	0.165641
1.35256	0.232148	0.0271363	0.000618687	13.0422	2.99	2.09167	1.13652	0.240394	0.934895	0.129076	12.8744	0.167798
1.35372	0.235224	0.0271448	0.000612846	13.0488	2.99	2.09167	2.65187	0.241075	0.586905	0.129712	12.8801	0.168626
1.35488	0.234785	0.0271582	0.000613628	13.055	2.99	2.09167	-0.378839	0.24067	-0.349272	0.129768	12.8863	0.168699
1.35604	0.234492	0.0271664	0.000613059	13.0593	2.99	2.09167	-0.252559	0.240543	-0.108701	0.130432	12.8897	0.169562
1.3572	0.234638	0.0271732	0.000612513	13.0628	2.99	2.09167	0.12628	0.240639	0.0827845	0.1314	12.892	0.17082
1.35836	0.235078	0.027186	0.00061749	13.067	2.99	2.09167	0.378839	0.240787	0.127193	0.132429	12.8949	0.172158
1.35952	0.235371	0.0271958	0.000615895	13.0725	2.99	2.09167	0.252559	0.240872	0.0735836	0.133466	12.899	0.173505
1.36068	0.235224	0.0272103	0.000616249	13.0795	2.99	2.09167	-0.12628	0.240952	0.0690466	0.134578	12.9045	0.174951
1.36184	0.234052	0.0272319	0.000621577	13.0879	2.99	2.09167	-1.01024	0.241198	0.211652	0.135773	12.9114	0.176505
1.363	0.236103	0.0272467	0.000624459	13.0939	2.99	2.09167	1.76791	0.242007	0.697618	0.136872	12.916	0.177934
1.36416	0.23625	0.0272599	0.00062737	13.0992	2.99	2.09167	0.12628	0.242129	0.105067	0.137259	12.9207	0.178437
1.36532	0.236396	0.0272783	0.000635809	13.1047	2.99	2.09167	0.12628	0.242303	0.150054	0.137687	12.9257	0.178993
1.36648	0.237275	0.0272926	0.00063686	13.1113	2.99	2.09167	0.757678	0.24253	0.195109	0.138099	12.9318	0.179529
1.36764	0.236689	0.0273072	0.000637395	13.1183	2.99	2.09167	-0.505119	0.242524	-0.00493707	0.138439	12.9383	0.179971
1.3688	0.237422	0.0273302	0.000642639	13.1273	2.99	2.09167	0.631398	0.242855	0.285393	0.138961	12.9467	0.18065
1.36996	0.237861	0.027346	0.000644896	13.1342	2.99	2.09167	0.378839	0.243011	0.134512	0.139297	12.9531	0.181087
1.37112	0.237715	0.0273592	0.000646641	13.1399	2.99	2.09167	-0.12628	0.243106	0.0817655	0.139639	12.9584	0.181531
1.37228	0.239033	0.0273769	0.000653649	13.1457	2.99	2.09167	1.13652	0.243367	0.225208	0.140055	12.9636	0.182072
1.37344	0.238008	0.0273902	0.00065465	13.1518	2.99	2.09167	-0.883957	0.243226	-0.121627	0.140363	12.9693	0.182471
1.3746	0.240351	0.0274014	0.000649921	13.1593	2.99	2.09167	2.02047	0.243593	0.31609	0.141003	12.976	0.183303
1.37576	0.23874	0.0274188	0.000648806	13.1682	2.99	2.09167	-1.38908	0.243159	-0.373922	0.14142	12.9844	0.183847
1.37692	0.239472	0.0274305	0.000643882	13.176	2.99	2.09167	0.631398	0.24346	0.25992	0.142492	12.9907	0.18524
1.37808	0.239472	0.0274373	0.000637621	13.1819	2.99	2.09167	0	0.243587	0.109272	0.143415	12.9955	0.18644
1.37924	0.239619	0.0274471	0.000635794	13.1874	2.99	2.09167	0.12628	0.243824	0.203864	0.144382	12.9997	0.187696
1.3804	0.242988	0.0274654	0.000641149	13.1942	2.99	2.09167	2.90443	0.244113	0.249509	0.145272	13.0054	0.188854
1.38156	0.240205	0.0274817	0.000641042	13.2022	2.99	2.09167	-2.39931	0.243204	-0.783565	0.146031	13.0124	0.18984
1.38272	0.240498	0.0275025	0.000643446	13.2114	2.99	2.09167	0.252559	0.243485	0.242597	0.147969	13.0191	0.19236
1.38388	0.240791	0.0275215	0.000641489	13.2216	2.99	2.09167	0.252559	0.243763	0.239073	0.149788	13.0268	0.194724
1.38504	0.241523	0.0275332	0.000637644	13.2289	2.99	2.09167	0.631398	0.244036	0.235657	0.151493	13.032	0.196941
1.3862	0.241523	0.027546	0.000637133	13.2353	2.99	2.09167	0	0.244135	0.0852336	0.153091	13.0363	0.199018
1.38736	0.24167	0.0275652	0.00064298	13.2423	2.99	2.09167	0.12628	0.244344	0.180038	0.154775	13.0411	0.201208
1.38852	0.241963	0.0275821	0.000643365	13.2505	2.99	2.09167	0.252559	0.244606	0.225885	0.156428	13.0471	0.203356
1.38968	0.242109	0.0275997	0.000643789	13.2589	2.99	2.09167	0.12628	0.244864	0.222797	0.157992	13.0535	0.205389
1.39084	0.242695	0.0276244	0.0006448	13.2706	2.99	2.09167	0.505119	0.245176	0.268847	0.159474	13.0633	0.207316
1.392	0.242988	0.027641	0.000642824	13.2796	2.99	2.09167	0.252559	0.245371	0.167904	0.160817	13.0705	0.209062
1.39316	0.242842	0.0276548	0.000641436	13.2869	2.99	2.09167	-0.12628	0.245562	0.165112	0.162151	13.0761	0.210796
1.39432	0.243574	0.0276732	0.000646133	13.294	2.99	2.09167	0.631398	0.245921	0.309509	0.163481	13.0815	0.212525
1.39548	0.24372	0.0276902	0.00064647	13.3022	2.99	2.09167	0.12628	0.246107	0.159817	0.164626	13.0882	0.214014
1.39664	0.24372	0.027706	0.000642997	13.3114	2.99	2.09167	0	0.246346	0.206351	0.165777	13.0958	0.21551
1.3978	0.24372	0.0277284	0.000643135	13.3223	2.99	2.09167	0	0.246697	0.302013	0.166876	13.1053	0.216939
1.39896	0.244306	0.0277453	0.000638637	13.3324	2.99	2.09167	0.505119	0.247158	0.397812	0.167804	13.1142	0.218145
1.40012	0.245625	0.0277563	0.00063225	13.3404	2.99	2.09167	1.13652	0.247503	0.297639	0.16844	13.1214	0.218972
