# Supplementary material for: Effects of friction models on simulation of pneumatic cylinder
Source: Copernicus journal article supplement (doi:10.5194/ms-10-517-2019), 2019-10-30
Supplement: Supplementary file 3 [file Figure 9.xls]

## Sheet: output
tt	x	p1c	p2c	Fr1	u1	u2	v	vc	a	ac	Frs
0	0.119092	0.0005	0.0005	1.8814	2.5	2.5	0	0.108396	0	0.640161	0	0.5	0.83221
0.00116	0.119092	0.0005	0.0005	1.86777	2.5007	2.49942	0	0.106183	-1.90775	0.605621	0	0.5	0.787308
0.00232	0.120557	0.0005	0.0005	1.85414	2.5014	2.49885	1.2628	0.104018	-1.86652	0.572213	0	0.5	0.743877
0.00348	0.120264	0.0005	0.0005	1.84	2.5021	2.49827	-0.252559	0.10133	-2.3165	0.539904	0	0.5	0.701875
0.00464	0.119238	0.0005	0.0005	1.8258	2.5028	2.4977	-0.883957	0.0988027	-2.17907	0.508881	0	0.5	0.661545
0.0058	0.119092	0.0005	0.0005	1.812	2.5035	2.49712	-0.12628	0.0967177	-1.79744	0.479069	0	0.5	0.622789
0.00696	0.119092	0.0005	0.0005	1.79816	2.5042	2.49655	0	0.0947331	-1.71085	0.450282	0	0.5	0.585367
0.00812	0.118652	0.0005	0.0005	1.78439	2.5049	2.49597	-0.378839	0.0927912	-1.67406	0.422469	0	0.5	0.54921
0.00928	0.119238	0.0005	0.0005	1.77078	2.50559	2.4954	0.505119	0.0910617	-1.49091	0.395601	0	0.5	0.514281
0.01044	0.119238	0.0005	0.0005	1.75714	2.50629	2.49482	0	0.0891458	-1.6517	0.369582	0	0.5	0.480456
0.0116	0.118945	0.0005	0.0005	1.74365	2.50699	2.49424	-0.252559	0.0872699	-1.61708	0.344474	0	0.5	0.447816
0.01276	0.118652	0.0005	0.0005	1.72996	2.50769	2.49367	-0.252559	0.0855472	-1.48512	0.320249	0	0.5	0.416324
0.01392	0.121729	0.0005	0.0005	1.71609	2.50839	2.49309	2.65187	0.0839768	-1.35382	0.296837	0	0.5	0.385889
0.01508	0.122168	0.0005	0.0005	1.70173	2.50909	2.49252	0.378839	0.0812496	-2.35101	0.274169	0	0.5	0.35642
0.01624	0.119531	0.0005	0.0005	1.68728	2.50979	2.49194	-2.27303	0.0783884	-2.46657	0.252684	0	0.5	0.328489
0.0174	0.119092	0.0005	0.0005	1.67258	2.51049	2.49137	-0.378839	0.0765864	-1.55345	0.232424	0	0.5	0.302151
0.01856	0.118213	0.0005	0.0005	1.65766	2.51119	2.49079	-0.757678	0.0749895	-1.37659	0.212968	0	0.5	0.276858
0.01972	0.119385	0.0005	0.0005	1.64342	2.51189	2.49022	1.01024	0.0737678	-1.05325	0.194228	0	0.5	0.252496
0.02088	0.117188	0.0005	0.0005	1.62918	2.51259	2.48964	-1.89419	0.0721241	-1.4169	0.17605	0	0.5	0.228865
0.02204	0.119092	0.0005	0.0005	1.61643	2.51329	2.48907	1.64164	0.0713663	-0.653328	0.158589	0	0.5	0.206166
0.0232	0.117041	0.0005	0.0005	1.60356	2.51398	2.48849	-1.76791	0.0699011	-1.26311	0.141495	0	0.5	0.183943
0.02436	0.119238	0.0005	0.0005	1.59056	2.51468	2.48791	1.89419	0.0692637	-0.549433	0.125033	0	0.5	0.162542
0.02552	0.119385	0.0005	0.0005	1.57725	2.51538	2.48734	0.12628	0.0678043	-1.2581	0.108874	0	0.5	0.141537
0.02668	0.120117	0.0005	0.0005	1.56422	2.51608	2.48676	0.631398	0.0663186	-1.28081	0.0933319	0	0.5	0.121331
0.02784	0.119385	0.0005	0.0005	1.55172	2.51678	2.48619	-0.631398	0.0645783	-1.50025	0.0784085	0	0.5	0.101931
0.029	0.119238	0.0005	0.0005	1.5397	2.51748	2.48561	-0.12628	0.0631515	-1.22998	0.0641962	0	0.5	0.083455
0.03016	0.119238	0.0005	0.0005	1.52739	2.51818	2.48504	0	0.0618101	-1.15642	0.0505669	0	0.5	0.0657369
0.03132	0.119092	0.0005	0.0005	1.51505	2.51888	2.48446	-0.12628	0.0604965	-1.13242	0.0374812	0	0.5	0.0487256
0.03248	0.119824	0.0005	0.0005	1.50252	2.51958	2.48389	0.631398	0.059267	-1.05989	0.0249226	0	0.5	0.0323994
0.03364	0.119238	0.0005	0.0005	1.49004	2.52027	2.48331	-0.505119	0.0577798	-1.28206	0.0128526	0	0.5	0.0167084
0.0348	0.119971	0.0005	0.0005	1.47788	2.52097	2.48274	0.631398	0.0565462	-1.06347	0.00136594	0	0.5	0.00177572
0.03596	0.119385	0.0005	0.0005	1.46616	2.52167	2.48216	-0.505119	0.0550536	-1.2867	-0.00964107	0	0.5	-0.0125334
0.03712	0.119238	0.0005	0.0005	1.45411	2.52237	2.48159	-0.12628	0.0538134	-1.06917	-0.0200728	0	0.5	-0.0260947
0.03828	0.118945	0.0005	0.0005	1.44185	2.52307	2.48101	-0.252559	0.0526543	-0.999236	-0.030032	0	0.5	-0.0390416
0.03944	0.119238	0.0005	0.0005	1.42939	2.52377	2.48044	0.252559	0.0516327	-0.880714	-0.0395545	0	0.5	-0.0514209
0.0406	0.119238	0.0005	0.0005	1.41724	2.52447	2.47986	0	0.0505205	-0.958739	-0.0486982	0	0.5	-0.0633077
0.04176	0.119385	0.0005	0.0005	1.40551	2.52516	2.47929	0.12628	0.0494311	-0.939121	-0.0574319	0	0.5	-0.0746615
0.04292	0.119531	0.0005	0.0005	1.39446	2.52586	2.47871	0.12628	0.0483071	-0.968963	-0.0657685	0	0.5	-0.0854991
0.04408	0.119385	0.0005	0.0005	1.38354	2.52656	2.47814	-0.12628	0.047148	-0.999241	-0.0736982	0	0.5	-0.0958077
0.04524	0.119092	0.0005	0.0005	1.37199	2.52726	2.47756	-0.252559	0.046067	-0.931896	-0.081211	0	0.5	-0.105574
0.0464	0.119092	0.0005	0.0005	1.36019	2.52796	2.47699	0	0.0451205	-0.81593	-0.0883406	0	0.5	-0.114843
0.04756	0.119238	0.0005	0.0005	1.34802	2.52866	2.47641	0.12628	0.0441944	-0.798409	-0.0951425	0	0.5	-0.123685
0.04872	0.119092	0.0005	0.0005	1.33609	2.52935	2.47584	-0.12628	0.0432313	-0.830284	-0.101628	0	0.5	-0.132116
0.04988	0.119238	0.0005	0.0005	1.32471	2.53005	2.47527	0.12628	0.0423445	-0.764459	-0.107784	0	0.5	-0.14012
0.05104	0.119238	0.0005	0.0005	1.31377	2.53075	2.47469	0	0.0414199	-0.797053	-0.113645	0	0.5	-0.147739
0.0522	0.119238	0.0005	0.0005	1.30269	2.53145	2.47412	0	0.040514	-0.780969	-0.119199	0	0.5	-0.154958
0.05336	0.119385	0.0005	0.0005	1.29131	2.53215	2.47354	0.12628	0.0396263	-0.765236	-0.124454	0	0.5	-0.16179
0.05452	0.119238	0.0005	0.0005	1.27971	2.53284	2.47297	-0.12628	0.0386996	-0.798885	-0.12942	0	0.5	-0.168246
0.05568	0.118945	0.0005	0.0005	1.26839	2.53354	2.47239	-0.252559	0.0378472	-0.734821	-0.134085	0	0.5	-0.17431
0.05684	0.119092	0.0005	0.0005	1.25744	2.53424	2.47182	0.12628	0.0371256	-0.622047	-0.138479	0	0.5	-0.180023
0.058	0.119238	0.0005	0.0005	1.24729	2.53494	2.47125	0.12628	0.0363639	-0.656668	-0.142656	0	0.5	-0.185452
0.05916	0.119238	0.0005	0.0005	1.23702	2.53563	2.47067	0	0.0355617	-0.691584	-0.1466	0	0.5	-0.190581
0.06032	0.119238	0.0005	0.0005	1.22647	2.53633	2.4701	0	0.0347754	-0.677776	-0.1503	0	0.5	-0.19539
0.06148	0.120264	0.0005	0.0005	1.21562	2.53703	2.46952	0.883957	0.0340049	-0.664272	-0.153762	0	0.5	-0.19989
0.06264	0.118359	0.0005	0.0005	1.20475	2.53773	2.46895	-1.64164	0.0328515	-0.994331	-0.156993	0	0.5	-0.204091
0.0638	0.120264	0.0005	0.0005	1.19463	2.53842	2.46838	1.64164	0.0324523	-0.344082	-0.159848	0	0.5	-0.207802
0.06496	0.119092	0.0005	0.0005	1.18448	2.53912	2.4678	-1.01024	0.0313283	-0.968972	-0.16262	0	0.5	-0.211406
0.06612	0.119238	0.0005	0.0005	1.17449	2.53982	2.46723	0.12628	0.0306735	-0.564503	-0.165028	0	0.5	-0.214536
0.06728	0.119092	0.0005	0.0005	1.16418	2.54051	2.46666	-0.12628	0.0299756	-0.60163	-0.167256	0	0.5	-0.217433
0.06844	0.118506	0.0005	0.0005	1.15334	2.54121	2.46608	-0.505119	0.0293481	-0.540952	-0.169289	0	0.5	-0.220076
0.0696	0.119092	0.0005	0.0005	1.14231	2.54191	2.46551	0.505119	0.0289613	-0.333403	-0.171155	0	0.5	-0.222501
0.07076	0.119238	0.0005	0.0005	1.13166	2.5426	2.46494	0.12628	0.0283601	-0.518309	-0.172947	0	0.5	-0.224831
0.07192	0.118945	0.0005	0.0005	1.12164	2.5433	2.46436	-0.252559	0.0277148	-0.556334	-0.174584	0	0.5	-0.226959
0.07308	0.120264	0.0005	0.0005	1.11183	2.544	2.46379	1.13652	0.0271957	-0.447496	-0.176048	0	0.5	-0.228863
0.07424	0.120117	0.0005	0.0005	1.10123	2.54469	2.46322	-0.12628	0.0261769	-0.878275	-0.177391	0	0.5	-0.230608
0.0754	0.116602	0.0005	0.0005	1.09005	2.54539	2.46264	-3.03071	0.0252267	-0.819072	-0.178418	0	0.5	-0.231943
0.07656	0.119092	0.0005	0.0005	1.07881	2.54609	2.46207	2.14675	0.0256532	0.367632	-0.179156	0	0.5	-0.232903
0.07772	0.119385	0.0005	0.0005	1.06772	2.54678	2.4615	0.252559	0.0251242	-0.456049	-0.18014	0	0.5	-0.234182
0.07888	0.118945	0.0005	0.0005	1.05696	2.54748	2.46092	-0.378839	0.0244927	-0.544368	-0.181	0	0.5	-0.235301
0.08004	0.118799	0.0005	0.0005	1.04624	2.54817	2.46035	-0.12628	0.0240429	-0.387744	-0.181697	0	0.5	-0.236206
0.0812	0.119971	0.0005	0.0005	1.03602	2.54887	2.45978	1.01024	0.0236609	-0.329369	-0.182301	0	0.5	-0.236991
0.08236	0.119092	0.0005	0.0005	1.02538	2.54956	2.45921	-0.757678	0.0228344	-0.712484	-0.182838	0	0.5	-0.23769
0.08352	0.120557	0.0005	0.0005	1.01451	2.55026	2.45863	1.2628	0.0223595	-0.40939	-0.183137	0	0.5	-0.238078
0.08468	0.118945	0.0005	0.0005	1.00311	2.55096	2.45806	-1.38908	0.0213258	-0.891084	-0.183334	0	0.5	-0.238334
0.08584	0.116895	0.0005	0.0005	0.991652	2.55165	2.45749	-1.76791	0.0209275	-0.343388	-0.183212	0	0.5	-0.238176
0.087	0.118652	0.0005	0.0005	0.980586	2.55235	2.45692	1.51536	0.021335	0.351269	-0.183018	0	0.5	-0.237923
0.08816	0.118506	0.0005	0.0005	0.969726	2.55304	2.45634	-0.12628	0.0210694	-0.228901	-0.183065	0	0.5	-0.237984
0.08932	0.119092	0.0005	0.0005	0.958574	2.55374	2.45577	0.505119	0.0208703	-0.17168	-0.183091	0	0.5	-0.238018
0.09048	0.118945	0.0005	0.0005	0.946959	2.55443	2.4552	-0.12628	0.020453	-0.359728	-0.183122	0	0.5	-0.238058
0.09164	0.118799	0.0005	0.0005	0.935183	2.55513	2.45463	-0.12628	0.0201018	-0.302747	-0.183073	0	0.5	-0.237995
0.0928	0.119092	0.0005	0.0005	0.923808	2.55582	2.45406	0.252559	0.0198166	-0.245903	-0.182971	0	0.5	-0.237862
0.09396	0.117627	0.0005	0.0005	0.914993	2.55652	2.45349	-1.2628	0.0194265	-0.336284	-0.18284	0	0.5	-0.237692
0.09512	0.121582	0.0005	0.0005	0.905971	2.55721	2.45291	3.40955	0.019614	0.161639	-0.182641	0	0.5	-0.237433
0.09628	0.118799	0.0005	0.0005	0.896628	2.5579	2.45234	-2.39931	0.0182745	-1.15477	-0.182596	0	0.5	-0.237375
0.09744	0.119678	0.0005	0.0005	0.886886	2.5586	2.45177	0.757678	0.018024	-0.215951	-0.182113	0	0.5	-0.236747
0.0986	0.119238	0.0005	0.0005	0.877162	2.55929	2.4512	-0.378839	0.0174403	-0.503178	-0.181615	0	0.5	-0.2361
0.09976	0.119092	0.0005	0.0005	0.867612	2.55999	2.45063	-0.12628	0.0170351	-0.349293	-0.180973	0	0.5	-0.235264
0.10092	0.119092	0.0005	0.0005	0.858763	2.56068	2.45006	0	0.0166945	-0.29364	-0.180254	0	0.5	-0.23433
0.10208	0.119531	0.0005	0.0005	0.849907	2.56137	2.44949	0.378839	0.0163614	-0.287157	-0.179484	0	0.5	-0.23333
0.10324	0.119092	0.0005	0.0005	0.841194	2.56207	2.44892	-0.378839	0.015865	-0.427916	-0.178666	0	0.5	-0.232266
0.1044	0.119385	0.0005	0.0005	0.832169	2.56276	2.44835	0.252559	0.0155464	-0.274642	-0.177736	0	0.5	-0.231057
0.10556	0.123193	0.0005	0.0005	0.822775	2.56345	2.44777	3.28327	0.0151211	-0.366681	-0.176762	0	0.5	-0.22979
0.10672	0.118066	0.0005	0.0005	0.813353	2.56415	2.4472	-4.41979	0.0132235	-1.63579	-0.175702	0	0.5	-0.228413
0.10788	0.11748	0.0005	0.0005	0.804543	2.56484	2.44663	-0.505119	0.0133229	0.0856664	-0.173985	0	0.5	-0.22618
0.10904	0.119531	0.0005	0.0005	0.795907	2.56553	2.44606	1.76791	0.0136558	0.286991	-0.172385	0	0.5	-0.2241
0.1102	0.118066	0.0005	0.0005	0.787167	2.56623	2.44549	-1.2628	0.0131985	-0.394235	-0.170991	0	0.5	-0.222288
0.11136	0.119238	0.0005	0.0005	0.777843	2.56692	2.44492	1.01024	0.013316	0.101268	-0.169497	0	0.5	-0.220346
0.11252	0.116455	0.0005	0.0005	0.768396	2.56761	2.44435	-2.39931	0.0129844	-0.285863	-0.168125	0	0.5	-0.218563
0.11368	0.119238	0.0005	0.0005	0.758497	2.5683	2.44378	2.39931	0.0137394	0.650897	-0.1667	0	0.5	-0.21671
0.11484	0.118066	0.0005	0.0005	0.749028	2.56899	2.44321	-1.01024	0.0134199	-0.275485	-0.165643	0	0.5	-0.215336
0.116	0.117041	0.0005	0.0005	0.740275	2.56969	2.44264	-0.883957	0.0135614	0.122028	-0.164537	0	0.5	-0.213898
0.11716	0.119385	0.0005	0.0005	0.731776	2.57038	2.44208	2.02047	0.0141073	0.470559	-0.16356	0	0.5	-0.212628
0.11832	0.119385	0.0005	0.0005	0.723013	2.57107	2.44151	0	0.0137493	-0.308567	-0.162868	0	0.5	-0.211729
0.11948	0.119385	0.0005	0.0005	0.714058	2.57176	2.44094	0	0.0133976	-0.303228	-0.162111	0	0.5	-0.210745
0.12064	0.119531	0.0005	0.0005	0.704946	2.57245	2.44037	0.12628	0.0130519	-0.298026	-0.161291	0	0.5	-0.209678
0.1218	0.118945	0.0005	0.0005	0.696196	2.57314	2.4398	-0.505119	0.0126551	-0.341996	-0.160408	0	0.5	-0.208531
0.12296	0.121582	0.0005	0.0005	0.687599	2.57384	2.43923	2.27303	0.0124917	-0.140929	-0.159444	0	0.5	-0.207277
0.12412	0.119678	0.0005	0.0005	0.678358	2.57453	2.43866	-1.64164	0.0113099	-1.01876	-0.158488	0	0.5	-0.206035
0.12528	0.120264	0.0005	0.0005	0.668911	2.57522	2.43809	0.505119	0.0108727	-0.376876	-0.157145	0	0.5	-0.204289
0.12644	0.119238	0.0005	0.0005	0.658708	2.57591	2.43752	-0.883957	0.0102129	-0.568805	-0.155703	0	0.5	-0.202414
0.1276	0.117627	0.0005	0.0005	0.648167	2.5766	2.43696	-1.38908	0.00995589	-0.221575	-0.154075	0	0.5	-0.200297
0.12876	0.119092	0.0005	0.0005	0.638054	2.57729	2.43639	1.2628	0.0103291	0.321709	-0.152416	0	0.5	-0.198141
0.12992	0.11792	0.0005	0.0005	0.630371	2.57798	2.43582	-1.01024	0.0101381	-0.164659	-0.150971	0	0.5	-0.196262
0.13108	0.118799	0.0005	0.0005	0.622515	2.57867	2.43525	0.757678	0.0104067	0.23158	-0.149519	0	0.5	-0.194375
0.13224	0.117773	0.0005	0.0005	0.614995	2.57936	2.43468	-0.883957	0.0103387	-0.058606	-0.14824	0	0.5	-0.192712
0.1334	0.118213	0.0005	0.0005	0.607191	2.58005	2.43412	0.378839	0.0106736	0.288674	-0.147	0	0.5	-0.1911
0.13456	0.118066	0.0005	0.0005	0.599705	2.58074	2.43355	-0.12628	0.0108426	0.145706	-0.145957	0	0.5	-0.189744
0.13572	0.120264	0.0005	0.0005	0.591961	2.58143	2.43298	1.89419	0.0110734	0.198953	-0.145046	0	0.5	-0.188559
0.13688	0.122168	0.0005	0.0005	0.584205	2.58212	2.43241	1.64164	0.0104559	-0.532314	-0.144289	0	0.5	-0.187576
0.13804	0.119238	0.0005	0.0005	0.576233	2.58281	2.43185	-2.52559	0.00910363	-1.16574	-0.143357	0	0.5	-0.186365
0.1392	0.118213	0.0005	0.0005	0.56815	2.58349	2.43128	-0.883958	0.00889315	-0.181453	-0.141965	0	0.5	-0.184555
0.14036	0.119238	0.0005	0.0005	0.560432	2.58418	2.43071	0.883957	0.00908486	0.165265	-0.140556	0	0.5	-0.182722
0.14152	0.119238	0.0005	0.0005	0.552671	2.58487	2.43015	0	0.00888247	-0.174472	-0.139284	0	0.5	-0.181069
0.14268	0.119238	0.0005	0.0005	0.544744	2.58556	2.42958	0	0.00868408	-0.171023	-0.137996	0	0.5	-0.179394
0.14384	0.119385	0.0005	0.0005	0.537124	2.58625	2.42901	0.12628	0.00848961	-0.16765	-0.136693	0	0.5	-0.177701
0.145	0.119092	0.0005	0.0005	0.529402	2.58694	2.42845	-0.252559	0.00824207	-0.213391	-0.135376	0	0.5	-0.175989
0.14616	0.119385	0.0005	0.0005	0.521703	2.58762	2.42788	0.252559	0.00811202	-0.112116	-0.134024	0	0.5	-0.174231
0.14732	0.119092	0.0005	0.0005	0.514258	2.58831	2.42732	-0.252559	0.00787185	-0.207041	-0.132682	0	0.5	-0.172487
0.14848	0.119092	0.0005	0.0005	0.506478	2.589	2.42675	0	0.007749	-0.105909	-0.131307	0	0.5	-0.170699
0.14964	0.119238	0.0005	0.0005	0.49876	2.58968	2.42619	0.12628	0.00762964	-0.102899	-0.129943	0	0.5	-0.168925
0.1508	0.119238	0.0005	0.0005	0.491242	2.59037	2.42562	0	0.00745683	-0.148974	-0.128591	0	0.5	-0.167168
0.15196	0.119092	0.0005	0.0005	0.483536	2.59106	2.42505	-0.12628	0.00728738	-0.146078	-0.12723	0	0.5	-0.165399
0.15312	0.119092	0.0005	0.0005	0.475812	2.59174	2.42449	0	0.00717809	-0.0942103	-0.12586	0	0.5	-0.163618
0.15428	0.119092	0.0005	0.0005	0.468276	2.59243	2.42392	0	0.00707204	-0.0914233	-0.124505	0	0.5	-0.161856
0.15544	0.119385	0.0005	0.0005	0.460364	2.59312	2.42336	0.252559	0.00696917	-0.0886767	-0.123164	0	0.5	-0.160114
0.1566	0.118945	0.0005	0.0005	0.452224	2.5938	2.4228	-0.378839	0.00675568	-0.184047	-0.12184	0	0.5	-0.158391
0.15776	0.119238	0.0005	0.0005	0.444154	2.59449	2.42223	0.252559	0.00671588	-0.0343095	-0.120487	0	0.5	-0.156633
0.15892	0.119092	0.0005	0.0005	0.435675	2.59517	2.42167	-0.12628	0.00656534	-0.129778	-0.119173	0	0.5	-0.154924
0.16008	0.119238	0.0005	0.0005	0.426956	2.59586	2.4211	0.12628	0.00647464	-0.0781897	-0.117854	0	0.5	-0.15321
0.16124	0.119238	0.0005	0.0005	0.418027	2.59655	2.42054	0	0.00632997	-0.124713	-0.116553	0	0.5	-0.151519
0.1624	0.119238	0.0005	0.0005	0.410496	2.59723	2.41998	0	0.00618816	-0.122255	-0.115248	0	0.5	-0.149823
0.16356	0.119238	0.0005	0.0005	0.402785	2.59791	2.41941	0	0.00604913	-0.119853	-0.11394	0	0.5	-0.148123
0.16472	0.118652	0.0005	0.0005	0.39504	2.5986	2.41885	-0.505119	0.00591282	-0.117503	-0.11263	0	0.5	-0.146419
0.16588	0.119092	0.0005	0.0005	0.38729	2.59928	2.41828	0.378839	0.00600672	0.0809448	-0.111317	0	0.5	-0.144712
0.16704	0.119238	0.0005	0.0005	0.379349	2.59997	2.41772	0.12628	0.00593267	-0.0638371	-0.110091	0	0.5	-0.143119
0.1682	0.12085	0.0005	0.0005	0.371251	2.60065	2.41716	1.38908	0.00580441	-0.110571	-0.108886	0	0.5	-0.141552
0.16936	0.119238	0.0005	0.0005	0.362993	2.60134	2.4166	-1.38908	0.00505304	-0.647733	-0.10768	0	0.5	-0.139984
0.17052	0.119238	0.0005	0.0005	0.35442	2.60202	2.41603	0	0.00492967	-0.106354	-0.106231	0	0.5	-0.1381
0.17168	0.12041	0.0005	0.0005	0.345635	2.6027	2.41547	1.01024	0.00480852	-0.104441	-0.104781	0	0.5	-0.136216
0.17284	0.118066	0.0005	0.0005	0.338836	2.60339	2.41491	-2.02047	0.00423446	-0.494875	-0.103332	0	0.5	-0.134332
0.174	0.118945	0.0005	0.0005	0.331802	2.60407	2.41435	0.757678	0.00457245	0.291374	-0.101707	0	0.5	-0.132219
0.17516	0.118359	0.0005	0.0005	0.324525	2.60475	2.41379	-0.505119	0.0045712	-0.00107759	-0.100258	0	0.5	-0.130336
0.17632	0.118652	0.0005	0.0005	0.317655	2.60543	2.41322	0.252559	0.00479955	0.196849	-0.0988545	0	0.5	-0.128511
0.17748	0.119092	0.0005	0.0005	0.310988	2.60612	2.41266	0.378839	0.00491629	0.100638	-0.097584	0	0.5	-0.126859
0.17864	0.119238	0.0005	0.0005	0.304247	2.6068	2.4121	0.12628	0.00486459	-0.0445672	-0.0964027	0	0.5	-0.125323
0.1798	0.119238	0.0005	0.0005	0.298616	2.60748	2.41154	0	0.0047582	-0.0917164	-0.0952447	0	0.5	-0.123818
0.18096	0.119238	0.0005	0.0005	0.292553	2.60816	2.41098	0	0.00465395	-0.0898672	-0.0940884	0	0.5	-0.122315
0.18212	0.119385	0.0005	0.0005	0.286252	2.60884	2.41042	0.12628	0.0045518	-0.0880612	-0.0929339	0	0.5	-0.120814
0.18328	0.119238	0.0005	0.0005	0.280005	2.60952	2.40986	-0.12628	0.00439482	-0.135331	-0.0917817	0	0.5	-0.119316
0.18444	0.119385	0.0005	0.0005	0.274227	2.6102	2.4093	0.12628	0.0042967	-0.0845862	-0.0906098	0	0.5	-0.117793
0.1856	0.119238	0.0005	0.0005	0.268357	2.61088	2.40874	-0.12628	0.00414363	-0.131956	-0.0894406	0	0.5	-0.116273
0.18676	0.119092	0.0005	0.0005	0.262594	2.61156	2.40818	-0.12628	0.00404931	-0.0813095	-0.0882523	0	0.5	-0.114728
0.18792	0.119092	0.0005	0.0005	0.256183	2.61224	2.40762	0	0.0040137	-0.0306983	-0.0870671	0	0.5	-0.113187
0.18908	0.119092	0.0005	0.0005	0.249566	2.61292	2.40706	0	0.0039799	-0.0291397	-0.0859074	0	0.5	-0.11168
0.19024	0.119238	0.0005	0.0005	0.243078	2.6136	2.4065	0.12628	0.00394789	-0.0275948	-0.0847731	0	0.5	-0.110205
0.1914	0.119092	0.0005	0.0005	0.236978	2.61428	2.40594	-0.12628	0.00386077	-0.0750991	-0.0836647	0	0.5	-0.108764
0.19256	0.119092	0.0005	0.0005	0.230726	2.61496	2.40538	0	0.00383228	-0.0245621	-0.0825601	0	0.5	-0.107328
0.19372	0.119092	0.0005	0.0005	0.224564	2.61564	2.40482	0	0.00380552	-0.0230741	-0.0814816	0	0.5	-0.105926
0.19488	0.119385	0.0005	0.0005	0.217829	2.61632	2.40426	0.252559	0.00378046	-0.0215966	-0.0804294	0	0.5	-0.104558
0.19604	0.119092	0.0005	0.0005	0.210782	2.617	2.40371	-0.252559	0.00364335	-0.118203	-0.0794038	0	0.5	-0.103225
0.1972	0.119238	0.0005	0.0005	0.203741	2.61768	2.40315	0.12628	0.00362164	-0.0187138	-0.0783606	0	0.5	-0.101869
0.19836	0.119238	0.0005	0.0005	0.197161	2.61835	2.40259	0	0.00354468	-0.0663448	-0.0773443	0	0.5	-0.100548
0.19952	0.119238	0.0005	0.0005	0.191463	2.61903	2.40203	0	0.00346932	-0.0649681	-0.076333	0	0.5	-0.0992329
0.20068	0.118945	0.0005	0.0005	0.185546	2.61971	2.40147	-0.252559	0.00339552	-0.0636216	-0.0753268	0	0.5	-0.0979249
0.20184	0.119092	0.0005	0.0005	0.178526	2.62039	2.40092	0.12628	0.00343701	0.0357733	-0.0743259	0	0.5	-0.0966237
0.203	0.119238	0.0005	0.0005	0.171134	2.62106	2.40036	0.12628	0.00342317	-0.0119302	-0.0733746	0	0.5	-0.0953869
0.20416	0.119971	0.0005	0.0005	0.163173	2.62174	2.3998	0.631398	0.00335399	-0.0596379	-0.0724509	0	0.5	-0.0941862
0.20532	0.118652	0.0005	0.0005	0.155568	2.62242	2.39925	-1.13652	0.0030019	-0.303526	-0.071533	0	0.5	-0.0929929
0.20648	0.119385	0.0005	0.0005	0.148958	2.62309	2.39869	0.631398	0.00316312	0.138981	-0.0705106	0	0.5	-0.0916638
0.20764	0.118945	0.0005	0.0005	0.142357	2.62377	2.39813	-0.378839	0.00304135	-0.104979	-0.0695826	0	0.5	-0.0904574
0.2088	0.119092	0.0005	0.0005	0.136635	2.62444	2.39758	0.12628	0.00309159	0.0433147	-0.0686387	0	0.5	-0.0892303
0.20996	0.119092	0.0005	0.0005	0.130501	2.62512	2.39702	0	0.00308634	-0.00452328	-0.0677451	0	0.5	-0.0880687
0.21112	0.119092	0.0005	0.0005	0.12365	2.62579	2.39647	0	0.00308249	-0.00332414	-0.0668801	0	0.5	-0.0869441
0.21228	0.119238	0.0005	0.0005	0.116959	2.62647	2.39591	0.12628	0.00308002	-0.00212672	-0.0660436	0	0.5	-0.0858567
0.21344	0.119238	0.0005	0.0005	0.110862	2.62714	2.39536	0	0.00302206	-0.049969	-0.065236	0	0.5	-0.0848068
0.2146	0.119238	0.0005	0.0005	0.104801	2.62782	2.3948	0	0.00296545	-0.0487957	-0.0644353	0	0.5	-0.0837658
0.21576	0.119092	0.0005	0.0005	0.0996085	2.62849	2.39425	-0.12628	0.00291019	-0.0476431	-0.0636415	0	0.5	-0.082734
0.21692	0.119238	0.0005	0.0005	0.0938085	2.62916	2.39369	0.12628	0.00291312	0.00252414	-0.062855	0	0.5	-0.0817116
0.21808	0.118945	0.0005	0.0005	0.0878197	2.62984	2.39314	-0.252559	0.00286047	-0.0453828	-0.062098	0	0.5	-0.0807274
0.21924	0.119092	0.0005	0.0005	0.0819101	2.63051	2.39258	0.12628	0.00292288	0.0538043	-0.0613485	0	0.5	-0.079753
0.2204	0.119385	0.0005	0.0005	0.076358	2.63118	2.39203	0.252559	0.00292973	0.00590086	-0.0606508	0	0.5	-0.0788461
0.22156	0.119092	0.0005	0.0005	0.0741389	2.63186	2.39148	-0.252559	0.00282413	-0.0910362	-0.0599831	0	0.5	-0.0779781
0.22272	0.119238	0.0005	0.0005	0.0718683	2.63253	2.39092	0.12628	0.00283357	0.00813534	-0.0593015	0	0.5	-0.0770919
0.22388	0.119092	0.0005	0.0005	0.0678391	2.6332	2.39037	-0.12628	0.00278739	-0.0398017	-0.0586502	0	0.5	-0.0762453
0.22504	0.119238	0.0005	0.0005	0.0633881	2.63387	2.38982	0.12628	0.00279936	0.0103181	-0.0580074	0	0.5	-0.0754096
0.2262	0.121436	0.0005	0.0005	0.0589404	2.63454	2.38926	1.89419	0.00275571	-0.0376319	-0.0573954	0	0.5	-0.074614
0.22736	0.12085	0.0005	0.0005	0.0549098	2.63522	2.38871	-0.505119	0.00186004	-0.77213	-0.0567923	0	0.5	-0.07383
0.22852	0.117627	0.0005	0.0005	0.0514192	2.63589	2.38816	-2.77815	0.00119274	-0.575256	-0.0558669	0	0.5	-0.072627
0.22968	0.119092	0.0005	0.0005	0.0478453	2.63656	2.38761	1.2628	0.00177743	0.50404	-0.0547076	0	0.5	-0.0711199
0.23084	0.119092	0.0005	0.0005	0.0434513	2.63723	2.38706	0	0.00179408	0.0143509	-0.0538	0	0.5	-0.06994
0.232	0.119238	0.0005	0.0005	0.0384681	2.6379	2.3865	0.12628	0.00181153	0.0150483	-0.0529231	0	0.5	-0.0688
0.23316	0.119238	0.0005	0.0005	0.0331907	2.63857	2.38595	0	0.00177292	-0.0332862	-0.0520768	0	0.5	-0.0676998
0.23432	0.118945	0.0005	0.0005	0.0281192	2.63924	2.3854	-0.252559	0.00173511	-0.0325983	-0.051239	0	0.5	-0.0666107
0.23548	0.11792	0.0005	0.0005	0.0235322	2.63991	2.38485	-0.883957	0.00181184	0.0661517	-0.0504095	0	0.5	-0.0655324
0.23664	0.118506	0.0005	0.0005	0.0199501	2.64057	2.3843	0.505119	0.00228758	0.41012	-0.0496326	0	0.5	-0.0645224
0.2378	0.119238	0.0005	0.0005	0.0155571	2.64124	2.38375	0.631398	0.00253682	0.214857	-0.0490628	0	0.5	-0.0637816
0.23896	0.119238	0.0005	0.0005	0.0103841	2.64191	2.3832	0	0.00250277	-0.0293466	-0.0486118	0	0.5	-0.0631954
0.24012	0.119092	0.0005	0.0005	0.00483943	2.64258	2.38265	-0.12628	0.00246986	-0.0283759	-0.0481696	0	0.5	-0.0626204
0.24128	0.119092	0.0005	0.0005	-0.000620221	2.64325	2.3821	0	0.00249494	0.0216224	-0.0477362	0	0.5	-0.0620571
0.24244	0.118066	0.0005	0.0005	-0.00576472	2.64391	2.38155	-0.883957	0.00252114	0.0225905	-0.0473341	0	0.5	-0.0615343
0.2436	0.119824	0.0005	0.0005	-0.0100188	2.64458	2.381	1.51536	0.00294667	0.366834	-0.0469635	0	0.5	-0.0610525
0.24476	0.119531	0.0005	0.0005	-0.0143579	2.64525	2.38045	-0.252559	0.00269092	-0.220476	-0.0467793	0	0.5	-0.0608131
0.24592	0.118506	0.0005	0.0005	-0.0201166	2.64591	2.37991	-0.883957	0.00255015	-0.121354	-0.0465168	0	0.5	-0.0604719
0.24708	0.119824	0.0005	0.0005	-0.0258344	2.64658	2.37936	1.13652	0.00280871	0.222901	-0.0462207	0	0.5	-0.0600869
0.24824	0.118945	0.0005	0.0005	-0.0316643	2.64725	2.37881	-0.757678	0.00255659	-0.217349	-0.0460457	0	0.5	-0.0598595
0.2494	0.119238	0.0005	0.0005	-0.037711	2.64791	2.37826	0.252559	0.00264692	0.0778698	-0.0457936	0	0.5	-0.0595317
0.25056	0.121729	0.0005	0.0005	-0.0429516	2.64858	2.37771	2.14675	0.00262467	-0.0191767	-0.0455972	0	0.5	-0.0592764
0.25172	0.119238	0.0005	0.0005	-0.0486052	2.64924	2.37717	-2.14675	0.00163658	-0.851802	-0.0454127	0	0.5	-0.0590366
0.25288	0.119678	0.0005	0.0005	-0.055392	2.64991	2.37662	0.378839	0.00161626	-0.0175224	-0.044865	0	0.5	-0.0583245
0.25404	0.119385	0.0005	0.0005	-0.0626882	2.65057	2.37607	-0.252559	0.00142601	-0.164009	-0.0443296	0	0.5	-0.0576285
0.2552	0.118799	0.0005	0.0005	-0.0699729	2.65123	2.37553	-0.505119	0.00135017	-0.0653784	-0.0437403	0	0.5	-0.0568623
0.25636	0.120996	0.0005	0.0005	-0.0769254	2.6519	2.37498	1.89419	0.00150247	0.131297	-0.0431412	0	0.5	-0.0560835
0.25752	0.11748	0.0005	0.0005	-0.0843952	2.65256	2.37444	-3.03071	0.000802195	-0.603687	-0.0426207	0	0.5	-0.0554069
0.25868	0.118652	0.0005	0.0005	-0.0886649	2.65322	2.37389	1.01024	0.00146749	0.573532	-0.0418474	0	0.5	-0.0544017
0.25984	0.118945	0.0005	0.0005	-0.0937027	2.65389	2.37334	0.252559	0.00167838	0.181799	-0.0413514	0	0.5	-0.0537568
0.261	0.119092	0.0005	0.0005	-0.0997583	2.65455	2.3728	0.12628	0.00177625	0.0843759	-0.0409559	0	0.5	-0.0532426
0.26216	0.119385	0.0005	0.0005	-0.105771	2.65521	2.37225	0.252559	0.00181805	0.0360267	-0.0406168	0	0.5	-0.0528019
0.26332	0.119238	0.0005	0.0005	-0.111354	2.65587	2.37171	-0.12628	0.00174689	-0.0613422	-0.0403123	0	0.5	-0.052406
0.26448	0.119092	0.0005	0.0005	-0.116251	2.65653	2.37117	-0.12628	0.0017334	-0.0116259	-0.0399983	0	0.5	-0.0519977
0.26564	0.122021	0.0005	0.0005	-0.117253	2.65719	2.37062	2.52559	0.00177758	0.0380845	-0.039697	0	0.5	-0.0516062
0.2668	0.119678	0.0005	0.0005	-0.118994	2.65785	2.37008	-2.02047	0.000684883	-0.941981	-0.0394309	0	0.5	-0.0512601
0.26796	0.119385	0.0005	0.0005	-0.121753	2.65852	2.36953	-0.252559	0.000502635	-0.15711	-0.0387581	0	0.5	-0.0503855
0.26912	0.119824	0.0005	0.0005	-0.124814	2.65918	2.36899	0.378839	0.000434381	-0.0588397	-0.038032	0	0.5	-0.0494416
0.27028	0.118945	0.0005	0.0005	-0.12808	2.65983	2.36845	-0.757678	0.000195672	-0.205784	-0.0372966	0	0.5	-0.0484856
0.27144	0.118799	0.0005	0.0005	-0.131093	2.66049	2.36791	-0.12628	0.000298353	0.0885181	-0.0364853	0	0.5	-0.0474308
0.2726	0.120117	0.0005	0.0005	-0.132873	2.66115	2.36736	1.13652	0.000458053	0.137672	-0.0357302	0	0.5	-0.0464493
0.27376	0.119238	0.0005	0.0005	-0.135576	2.66181	2.36682	-0.757678	0.000106005	-0.30349	-0.0350533	0	0.5	-0.0455693
0.27492	0.119092	0.0005	0.0005	-0.139068	2.66247	2.36628	-0.12628	9.53074e-05	-0.00922845	-0.0342555	0	0.5	-0.0445321
0.27608	0.119385	0.0005	0.0005	-0.142843	2.66313	2.36574	0.252559	0.000141537	0.0398595	-0.0334689	0	0.5	-0.0435096
0.27724	0.119971	0.0005	0.0005	-0.146556	2.66379	2.3652	0.505119	7.4062e-05	-0.0581353	-0.0327154	0	0.5	-0.04253
0.2784	0.119092	0.0005	0.0005	-0.149955	2.66444	2.36466	-0.757678	-0.000220915	-0.254323	-0.0319504	0	0.5	-0.0415355
0.27956	0.119092	0.0005	0.0005	-0.152555	2.6651	2.36412	0	-0.000174688	0.0398509	-0.0310853	0	0.5	-0.0404108
0.28072	0.118066	0.0005	0.0005	-0.155817	2.66576	2.36358	-0.883957	-0.00012854	0.0397828	-0.0302521	0	0.5	-0.0393277
0.28188	0.119092	0.0005	0.0005	-0.159742	2.66641	2.36304	0.883957	0.000315738	0.382998	-0.0294504	0	0.5	-0.0382855
0.28304	0.118799	0.0005	0.0005	-0.163803	2.66707	2.3625	-0.252559	0.00036197	0.0398552	-0.0288346	0	0.5	-0.0374849
0.2842	0.119092	0.0005	0.0005	-0.167542	2.66772	2.36196	0.252559	0.000522134	0.138072	-0.0282496	0	0.5	-0.0367245
0.28536	0.119092	0.0005	0.0005	-0.170927	2.66838	2.36142	0	0.000568764	0.0401983	-0.0277396	0	0.5	-0.0360615
0.28652	0.118652	0.0005	0.0005	-0.173184	2.66903	2.36088	-0.378839	0.000615651	0.0404198	-0.0272603	0	0.5	-0.0354383
0.28768	0.116895	0.0005	0.0005	-0.173473	2.66969	2.36034	-1.51536	0.000833467	0.187772	-0.0268113	0	0.5	-0.0348548
0.28884	0.12041	0.0005	0.0005	-0.174141	2.67034	2.3598	3.03071	0.00173427	0.77655	-0.0264591	0	0.5	-0.0343968
0.29	0.119092	0.0005	0.0005	-0.175465	2.67099	2.35926	-1.13652	0.00127063	-0.399684	-0.0264686	0	0.5	-0.0344092
0.29116	0.119092	0.0005	0.0005	-0.176806	2.67165	2.35873	0	0.00131952	0.04215	-0.0263099	0	0.5	-0.0342029
0.29232	0.119238	0.0005	0.0005	-0.177976	2.6723	2.35819	0.12628	0.00136901	0.0426612	-0.0261821	0	0.5	-0.0340368
0.29348	0.119092	0.0005	0.0005	-0.178717	2.67295	2.35765	-0.12628	0.00136223	-0.00584397	-0.0260854	0	0.5	-0.033911
0.29464	0.119092	0.0005	0.0005	-0.179066	2.67361	2.35711	0	0.00141295	0.0437224	-0.0259977	0	0.5	-0.033797
0.2958	0.120264	0.0005	0.0005	-0.180317	2.67426	2.35658	1.01024	0.00146431	0.0442716	-0.0259414	0	0.5	-0.0337239
0.29696	0.118066	0.0005	0.0005	-0.183018	2.67491	2.35604	-1.89419	0.00106125	-0.347463	-0.0259168	0	0.5	-0.0336918
0.29812	0.120703	0.0005	0.0005	-0.186006	2.67556	2.35551	2.27303	0.00151193	0.388516	-0.0257473	0	0.5	-0.0334715
0.29928	0.121143	0.0005	0.0005	-0.188821	2.67621	2.35497	0.378839	0.000939379	-0.493577	-0.0257644	0	0.5	-0.0334938
0.30044	0.120264	0.0005	0.0005	-0.191098	2.67686	2.35444	-0.757678	0.000196601	-0.640326	-0.0255708	0	0.5	-0.0332421
0.3016	0.119678	0.0005	0.0005	-0.193103	2.67751	2.3539	-0.505119	-0.000204785	-0.346022	-0.0251003	0	0.5	-0.0326304
0.30276	0.119238	0.0005	0.0005	-0.195902	2.67816	2.35337	-0.378839	-0.000378728	-0.149951	-0.0244852	0	0.5	-0.0318308
0.30392	0.119238	0.0005	0.0005	-0.199642	2.67881	2.35283	0	-0.00038219	-0.00298448	-0.0238136	0	0.5	-0.0309577
0.30508	0.119092	0.0005	0.0005	-0.203582	2.67946	2.3523	-0.12628	-0.000385824	-0.00313276	-0.0231514	0	0.5	-0.0300968
0.30624	0.119824	0.0005	0.0005	-0.20765	2.68011	2.35176	0.631398	-0.000332748	0.0457552	-0.0224982	0	0.5	-0.0292477
0.3074	0.118652	0.0005	0.0005	-0.211728	2.68076	2.35123	-1.01024	-0.000564241	-0.199563	-0.0218757	0	0.5	-0.0284385
0.30856	0.119678	0.0005	0.0005	-0.21524	2.6814	2.3507	0.883957	-0.000340917	0.192521	-0.0211732	0	0.5	-0.0275252
0.30972	0.118066	0.0005	0.0005	-0.216631	2.68205	2.35016	-1.38908	-0.000515934	-0.150877	-0.020567	0	0.5	-0.0267371
0.31088	0.118652	0.0005	0.0005	-0.218329	2.6827	2.34963	0.505119	-6.54607e-05	0.388305	-0.0199021	0	0.5	-0.0258727
0.31204	0.119238	0.0005	0.0005	-0.220707	2.68334	2.3491	0.505119	0.000157448	0.192197	-0.019421	0	0.5	-0.0252473
0.3132	0.119238	0.0005	0.0005	-0.223171	2.68399	2.34857	0	0.000152891	-0.00392845	-0.0190353	0	0.5	-0.0247459
0.31436	0.119238	0.0005	0.0005	-0.225286	2.68464	2.34804	0	0.000148404	-0.0038681	-0.0186564	0	0.5	-0.0242533
0.31552	0.119238	0.0005	0.0005	-0.226749	2.68528	2.34751	0	0.000143983	-0.00381121	-0.0182841	0	0.5	-0.0237693
0.31668	0.117773	0.0005	0.0005	-0.228226	2.68593	2.34697	-1.2628	0.000139627	-0.00375517	-0.0179183	0	0.5	-0.0232938
0.31784	0.118945	0.0005	0.0005	-0.231371	2.68657	2.34644	1.01024	0.000704173	0.486678	-0.017559	0	0.5	-0.0228267
0.319	0.119385	0.0005	0.0005	-0.235309	2.68721	2.34591	0.378839	0.000813966	0.0946491	-0.0174268	0	0.5	-0.0226548
0.32016	0.119385	0.0005	0.0005	-0.239227	2.68786	2.34538	0	0.000753473	-0.0521491	-0.017345	0	0.5	-0.0225485
0.32132	0.119092	0.0005	0.0005	-0.242667	2.6885	2.34485	-0.252559	0.000693319	-0.0518569	-0.0172476	0	0.5	-0.0224219
0.32248	0.119238	0.0005	0.0005	-0.245372	2.68914	2.34433	0.12628	0.000747246	0.0464888	-0.0171346	0	0.5	-0.022275
0.32364	0.119092	0.0005	0.0005	-0.248078	2.68979	2.3438	-0.12628	0.000744625	-0.00225948	-0.0170502	0	0.5	-0.0221653
0.3248	0.119238	0.0005	0.0005	-0.251738	2.69043	2.34327	0.12628	0.000799224	0.0470681	-0.0169725	0	0.5	-0.0220643
0.32596	0.119238	0.0005	0.0005	-0.256119	2.69107	2.34274	0	0.000797299	-0.00165948	-0.0169237	0	0.5	-0.0220008
0.32712	0.121143	0.0005	0.0005	-0.260464	2.69171	2.34221	1.64164	0.000795733	-0.00135	-0.0168817	0	0.5	-0.0219463
0.32828	0.119238	0.0005	0.0005	-0.264583	2.69235	2.34168	-1.64164	5.50346e-05	-0.638563	-0.0168468	0	0.5	-0.0219008
0.32944	0.119385	0.0005	0.0005	-0.267907	2.69299	2.34116	0.12628	5.38517e-05	-0.000948276	-0.0165318	0	0.5	-0.0214913
0.3306	0.119092	0.0005	0.0005	-0.27142	2.69363	2.34063	-0.252559	-4.19068e-06	-0.0500776	-0.0162237	0	0.5	-0.0210909
0.33176	0.119092	0.0005	0.0005	-0.273479	2.69427	2.3401	0	5.15327e-05	0.0480086	-0.0159005	0	0.5	-0.0206706
0.33292	0.119092	0.0005	0.0005	-0.276291	2.69491	2.33958	0	0.000107279	0.0480853	-0.015606	0	0.5	-0.0202878
0.33408	0.119092	0.0005	0.0005	-0.27934	2.69555	2.33905	0	0.000163074	0.0480991	-0.0153402	0	0.5	-0.0199423
0.33524	0.119238	0.0005	0.0005	-0.282259	2.69619	2.33853	0.12628	0.000218943	0.0481629	-0.0151031	0	0.5	-0.019634
0.3364	0.119385	0.0005	0.0005	-0.28459	2.69683	2.338	0.12628	0.000218026	-0.000790517	-0.0148943	0	0.5	-0.0193627
0.33756	0.119238	0.0005	0.0005	-0.286892	2.69747	2.33748	-0.12628	0.000160323	-0.049744	-0.014692	0	0.5	-0.0190996
0.33872	0.119092	0.0005	0.0005	-0.289234	2.6981	2.33695	-0.12628	0.000159577	-0.000643103	-0.0144739	0	0.5	-0.018816
0.33988	0.119238	0.0005	0.0005	-0.292359	2.69874	2.33643	0.12628	0.000215786	0.048456	-0.014262	0	0.5	-0.0185405
0.34104	0.119238	0.0005	0.0005	-0.296548	2.69938	2.3359	0	0.000215209	-0.000497414	-0.0140783	0	0.5	-0.0183018
0.3422	0.119238	0.0005	0.0005	-0.300723	2.70001	2.33538	0	0.000214729	-0.000413793	-0.0139008	0	0.5	-0.018071
0.34336	0.119238	0.0005	0.0005	-0.30454	2.70065	2.33486	0	0.000214345	-0.000331034	-0.0137293	0	0.5	-0.0178481
0.34452	0.119238	0.0005	0.0005	-0.307305	2.70128	2.33434	0	0.000214058	-0.000247414	-0.0135639	0	0.5	-0.017633
0.34568	0.120117	0.0005	0.0005	-0.310256	2.70192	2.33381	0.757678	0.000213867	-0.000164655	-0.0134045	0	0.5	-0.0174258
0.34684	0.119238	0.0005	0.0005	-0.313928	2.70255	2.33329	-0.757678	-0.00012753	-0.294308	-0.013251	0	0.5	-0.0172263
0.348	0.119385	0.0005	0.0005	-0.318264	2.70319	2.33277	0.12628	-0.000127682	-0.000131034	-0.0129709	0	0.5	-0.0168622
0.34916	0.119531	0.0005	0.0005	-0.322774	2.70382	2.33225	0.12628	-0.000184775	-0.0492181	-0.0126966	0	0.5	-0.0165056
0.35032	0.119238	0.0005	0.0005	-0.327632	2.70445	2.33173	-0.252559	-0.000298836	-0.0983284	-0.0124059	0	0.5	-0.0161277
0.35148	0.120557	0.0005	0.0005	-0.330127	2.70508	2.33121	1.13652	-0.000299263	-0.000368103	-0.0120765	0	0.5	-0.0156994
0.35264	0.119238	0.0005	0.0005	-0.332682	2.70572	2.33069	-1.13652	-0.00081178	-0.441825	-0.0117523	0	0.5	-0.015278
0.3538	0.119238	0.0005	0.0005	-0.333201	2.70635	2.33017	0	-0.000812707	-0.000799138	-0.0112344	0	0.5	-0.0146047
0.35496	0.119238	0.0005	0.0005	-0.334435	2.70698	2.32965	0	-0.000814001	-0.00111552	-0.0107212	0	0.5	-0.0139376
0.35612	0.119238	0.0005	0.0005	-0.335802	2.70761	2.32913	0	-0.000815661	-0.00143103	-0.0102123	0	0.5	-0.013276
0.35728	0.119238	0.0005	0.0005	-0.336978	2.70824	2.32861	0	-0.000817689	-0.00174828	-0.00970741	0	0.5	-0.0126196
0.35844	0.118652	0.0005	0.0005	-0.337591	2.70887	2.32809	-0.505119	-0.000820085	-0.00206552	-0.00920609	0	0.5	-0.0119679
0.3596	0.119238	0.0005	0.0005	-0.338198	2.7095	2.32757	0.505119	-0.000595315	0.193767	-0.00870797	0	0.5	-0.0113204
0.36076	0.119092	0.0005	0.0005	-0.338691	2.71013	2.32705	-0.12628	-0.000598349	-0.00261552	-0.00830107	0	0.5	-0.0107914
0.36192	0.119238	0.0005	0.0005	-0.339789	2.71076	2.32654	0.12628	-0.000544768	0.0461905	-0.00789673	0	0.5	-0.0102657
0.36308	0.119092	0.0005	0.0005	-0.341794	2.71139	2.32602	-0.12628	-0.000548317	-0.00305948	-0.00751675	0	0.5	-0.00977177
0.36424	0.119238	0.0005	0.0005	-0.343428	2.71201	2.3255	0.12628	-0.000495229	0.0457655	-0.00713877	0	0.5	-0.00928041
0.3654	0.119092	0.0005	0.0005	-0.344523	2.71264	2.32499	-0.12628	-0.000499248	-0.00346466	-0.00678463	0	0.5	-0.00882002
0.36656	0.119238	0.0005	0.0005	-0.345794	2.71327	2.32447	0.12628	-0.000446607	0.0453802	-0.00643199	0	0.5	-0.00836158
0.36772	0.119238	0.0005	0.0005	-0.34711	2.71389	2.32396	0	-0.000451052	-0.0038319	-0.00610268	0	0.5	-0.00793349
0.36888	0.118945	0.0005	0.0005	-0.348879	2.71452	2.32344	-0.252559	-0.0004557	-0.0040069	-0.0057744	0	0.5	-0.00750672
0.37004	0.119385	0.0005	0.0005	-0.351219	2.71514	2.32293	0.378839	-0.000346786	0.0938914	-0.00544691	0	0.5	-0.00708099
0.3712	0.119092	0.0005	0.0005	-0.353527	2.71577	2.32241	-0.252559	-0.000408679	-0.053356	-0.00516417	0	0.5	-0.00671342
0.37236	0.119092	0.0005	0.0005	-0.3555	2.71639	2.3219	0	-0.000356989	0.0445603	-0.00485973	0	0.5	-0.00631764
0.37352	0.119238	0.0005	0.0005	-0.357675	2.71702	2.32138	0.12628	-0.000305459	0.0444224	-0.00457754	0	0.5	-0.0059508
0.37468	0.119238	0.0005	0.0005	-0.359945	2.71764	2.32087	0	-0.000310951	-0.00473448	-0.00431743	0	0.5	-0.00561265
0.37584	0.119092	0.0005	0.0005	-0.359591	2.71826	2.32036	-0.12628	-0.000316583	-0.00485517	-0.00405713	0	0.5	-0.00527426
0.377	0.119092	0.0005	0.0005	-0.3597	2.71889	2.31985	0	-0.000265474	0.0440595	-0.00379647	0	0.5	-0.0049354
0.37816	0.119238	0.0005	0.0005	-0.359753	2.71951	2.31933	0.12628	-0.000214484	0.0439569	-0.00355736	0	0.5	-0.00462457
0.37932	0.119092	0.0005	0.0005	-0.359583	2.72013	2.31882	-0.12628	-0.000220475	-0.00516466	-0.00333966	0	0.5	-0.00434156
0.38048	0.118945	0.0005	0.0005	-0.359547	2.72075	2.31831	-0.12628	-0.000169681	0.0437879	-0.00312114	0	0.5	-0.00405748
0.38164	0.118213	0.0005	0.0005	-0.359649	2.72137	2.3178	-0.631398	-6.20801e-05	0.0927422	-0.00292375	0	0.5	-0.00380087
0.3828	0.119385	0.0005	0.0005	-0.359458	2.72199	2.31729	1.01024	0.000329913	0.337942	-0.00276945	0	0.5	-0.00360028
0.38396	0.119238	0.0005	0.0005	-0.35966	2.72261	2.31678	-0.12628	0.000266983	-0.05425	-0.00276863	0	0.5	-0.00359922
0.38512	0.119238	0.0005	0.0005	-0.360902	2.72323	2.31627	0	0.000261057	-0.00510862	-0.00274462	0	0.5	-0.003568
0.38628	0.119092	0.0005	0.0005	-0.361829	2.72385	2.31576	-0.12628	0.000255249	-0.0050069	-0.00271954	0	0.5	-0.0035354
0.38744	0.119238	0.0005	0.0005	-0.363069	2.72447	2.31525	0.12628	0.00030644	0.0441302	-0.00269343	0	0.5	-0.00350147
0.3886	0.119092	0.0005	0.0005	-0.364336	2.72509	2.31474	-0.12628	0.000300885	-0.00478879	-0.00268842	0	0.5	-0.00349495
0.38976	0.119385	0.0005	0.0005	-0.365468	2.7257	2.31423	0.252559	0.000352349	0.0443655	-0.00268246	0	0.5	-0.0034872
0.39092	0.119092	0.0005	0.0005	-0.366996	2.72632	2.31373	-0.252559	0.000290204	-0.0535733	-0.00269769	0	0.5	-0.003507
0.39208	0.119238	0.0005	0.0005	-0.369017	2.72694	2.31322	0.12628	0.000341958	0.0446155	-0.00269001	0	0.5	-0.00349701
0.39324	0.119238	0.0005	0.0005	-0.370792	2.72755	2.31271	0	0.000336982	-0.00428966	-0.00270363	0	0.5	-0.00351472
0.3944	0.119238	0.0005	0.0005	-0.369953	2.72817	2.31221	0	0.000332158	-0.00415862	-0.00271654	0	0.5	-0.00353151
0.39556	0.119238	0.0005	0.0005	-0.369479	2.72879	2.3117	0	0.000327483	-0.00403017	-0.0027288	0	0.5	-0.00354744
0.39672	0.119238	0.0005	0.0005	-0.369229	2.7294	2.31119	0	0.000322956	-0.00390259	-0.00274048	0	0.5	-0.00356262
0.39788	0.119238	0.0005	0.0005	-0.366689	2.73001	2.31069	0	0.000318574	-0.00377759	-0.00275163	0	0.5	-0.00357712
0.39904	0.119238	0.0005	0.0005	-0.364415	2.73063	2.31018	0	0.000314336	-0.00365345	-0.00276232	0	0.5	-0.00359101
0.4002	0.119678	0.0005	0.0005	-0.361958	2.73124	2.30968	0.378839	0.00031024	-0.00353103	-0.0027726	0	0.5	-0.00360439
0.40136	0.119238	0.0005	0.0005	-0.359419	2.73185	2.30917	-0.378839	0.000135631	-0.150525	-0.00278255	0	0.5	-0.00361731
0.40252	0.119238	0.0005	0.0005	-0.357374	2.73247	2.30867	0	0.000131736	-0.00335776	-0.00272594	0	0.5	-0.00354373
0.40368	0.119238	0.0005	0.0005	-0.356261	2.73308	2.30817	0	0.000127899	-0.00330776	-0.00266905	0	0.5	-0.00346977
0.40484	0.119092	0.0005	0.0005	-0.354836	2.73369	2.30766	-0.12628	0.000124121	-0.0032569	-0.00261187	0	0.5	-0.00339544
0.406	0.119092	0.0005	0.0005	-0.353828	2.7343	2.30716	0	0.000177282	0.0458284	-0.0025544	0	0.5	-0.00332073
0.40716	0.119092	0.0005	0.0005	-0.353793	2.73491	2.30666	0	0.000230523	0.0458974	-0.00251873	0	0.5	-0.00327435
0.40832	0.119238	0.0005	0.0005	-0.353419	2.73552	2.30616	0.12628	0.000283867	0.0459862	-0.00250486	0	0.5	-0.00325632
0.40948	0.119238	0.0005	0.0005	-0.353218	2.73613	2.30566	0	0.000280456	-0.00294052	-0.00251284	0	0.5	-0.00326669
0.41064	0.119238	0.0005	0.0005	-0.35331	2.73674	2.30516	0	0.000277171	-0.0028319	-0.00252063	0	0.5	-0.00327682
0.4118	0.119385	0.0005	0.0005	-0.353289	2.73734	2.30466	0.12628	0.000274011	-0.00272414	-0.00252827	0	0.5	-0.00328675
0.41296	0.119238	0.0005	0.0005	-0.353551	2.73795	2.30416	-0.12628	0.000214091	-0.0516552	-0.00253583	0	0.5	-0.00329658
0.41412	0.119238	0.0005	0.0005	-0.353851	2.73856	2.30366	0	0.00021115	-0.00253534	-0.00252126	0	0.5	-0.00327764
0.41528	0.119238	0.0005	0.0005	-0.353877	2.73917	2.30316	0	0.000208305	-0.00245259	-0.00250668	0	0.5	-0.00325869
0.41644	0.119238	0.0005	0.0005	-0.354412	2.73977	2.30266	0	0.000205554	-0.00237155	-0.00249213	0	0.5	-0.00323977
0.4176	0.119238	0.0005	0.0005	-0.355148	2.74038	2.30216	0	0.000202895	-0.00229224	-0.00247764	0	0.5	-0.00322093
0.41876	0.121289	0.0005	0.0005	-0.355567	2.74098	2.30166	1.76791	0.000200328	-0.00221293	-0.00246322	0	0.5	-0.00320219
0.41992	0.119238	0.0005	0.0005	-0.354207	2.74159	2.30116	-1.76791	-0.000598523	-0.688665	-0.00244892	0	0.5	-0.0031836
0.42108	0.118945	0.0005	0.0005	-0.353134	2.74219	2.30067	-0.252559	-0.00060127	-0.0023681	-0.00212551	0	0.5	-0.00276316
0.42224	0.118945	0.0005	0.0005	-0.35183	2.74279	2.30017	0	-0.000490519	0.095475	-0.00180199	0	0.5	-0.00234258
0.4234	0.119092	0.0005	0.0005	-0.350942	2.7434	2.29967	0.12628	-0.00037999	0.0952836	-0.00152228	0	0.5	-0.00197897
0.42456	0.119238	0.0005	0.0005	-0.350433	2.744	2.29918	0.12628	-0.000326516	0.0460983	-0.00128619	0	0.5	-0.00167204
0.42572	0.119238	0.0005	0.0005	-0.349625	2.7446	2.29868	0	-0.000330073	-0.00306638	-0.00107143	0	0.5	-0.00139287
0.42688	0.118945	0.0005	0.0005	-0.348282	2.7452	2.29819	-0.252559	-0.000333778	-0.00319397	-0.000855785	0	0.5	-0.00111252
0.42804	0.119092	0.0005	0.0005	-0.347132	2.7458	2.29769	0.12628	-0.000223866	0.0947517	-0.000639082	0	0.5	-0.000830807
0.4292	0.119385	0.0005	0.0005	-0.34626	2.7464	2.2972	0.252559	-0.000170939	0.0456267	-0.000465348	0	0.5	-0.000604953
0.43036	0.119092	0.0005	0.0005	-0.345959	2.747	2.2967	-0.252559	-0.000231856	-0.0525147	-0.000312378	0	0.5	-0.000406091
0.43152	0.119238	0.0005	0.0005	-0.345829	2.7476	2.29621	0.12628	-0.00017911	0.0454707	-0.000135892	0	0.5	-0.000176659
0.43268	0.119238	0.0005	0.0005	-0.345598	2.7482	2.29572	0	-0.000183329	-0.00363707	2.00501e-05	0	0.5	2.60652e-05
0.43384	0.119238	0.0005	0.0005	-0.344717	2.7488	2.29523	0	-0.00018763	-0.00370776	0.000177639	0	0.5	0.000230931
0.435	0.119238	0.0005	0.0005	-0.344276	2.7494	2.29473	0	-0.000192016	-0.00378103	0.000336979	0	0.5	0.000438073
0.43616	0.119238	0.0005	0.0005	-0.344188	2.75	2.29424	0	-0.000196488	-0.00385517	0.000498174	0	0.5	0.000647626
0.43732	0.119092	0.0005	0.0005	-0.343703	2.75059	2.29375	-0.12628	-0.000201049	-0.0039319	0.000661329	0	0.5	0.000859728
0.43848	0.119238	0.0005	0.0005	-0.343453	2.75119	2.29326	0.12628	-0.000148816	0.0450284	0.000826554	0	0.5	0.00107452
0.43964	0.119092	0.0005	0.0005	-0.343345	2.75178	2.29277	-0.12628	-0.000153535	-0.0040681	0.000971867	0	0.5	0.00126343
0.4408	0.119092	0.0005	0.0005	-0.342785	2.75238	2.29228	0	-0.000101438	0.0449112	0.00111945	0	0.5	0.00145529
0.44196	0.119092	0.0005	0.0005	-0.341513	2.75297	2.29179	0	-4.93879e-05	0.0448603	0.00124731	0	0.5	0.0016215
0.44312	0.119092	0.0005	0.0005	-0.340344	2.75357	2.2913	0	2.64053e-06	0.0448621	0.00135552	0	0.5	0.00176218
0.44428	0.119238	0.0005	0.0005	-0.339074	2.75416	2.29081	0.12628	5.46701e-05	0.0448793	0.00144413	0	0.5	0.00187737
0.44544	0.119238	0.0005	0.0005	-0.338235	2.75475	2.29033	0	4.98404e-05	-0.00422414	0.00151318	0	0.5	0.00196713
0.4466	0.119238	0.0005	0.0005	-0.338427	2.75535	2.28984	0	4.50332e-05	-0.00413793	0.00158481	0	0.5	0.00206026
0.44776	0.119238	0.0005	0.0005	-0.338364	2.75594	2.28935	0	4.02462e-05	-0.00413793	0.00165902	0	0.5	0.00215673
0.44892	0.119092	0.0005	0.0005	-0.337652	2.75653	2.28886	-0.12628	3.54774e-05	-0.00405172	0.00173584	0	0.5	0.0022566
0.45008	0.119385	0.0005	0.0005	-0.337291	2.75712	2.28838	0.252559	8.76085e-05	0.0449138	0.00181527	0	0.5	0.00235985
0.45124	0.119092	0.0005	0.0005	-0.337894	2.75771	2.28789	-0.252559	2.60112e-05	-0.0531034	0.00187529	0	0.5	0.00243787
0.4524	0.119092	0.0005	0.0005	-0.338994	2.7583	2.28741	0	7.81935e-05	0.045	0.00196007	0	0.5	0.00254809
0.45356	0.119238	0.0005	0.0005	-0.340531	2.75889	2.28692	0.12628	0.000130411	0.0450095	0.00202546	0	0.5	0.0026331
0.45472	0.119238	0.0005	0.0005	-0.341744	2.75948	2.28644	0	0.000125803	-0.00397241	0.00207149	0	0.5	0.00269293
0.45588	0.119092	0.0005	0.0005	-0.342467	2.76007	2.28595	-0.12628	0.000121252	-0.00392328	0.00212024	0	0.5	0.00275631
0.45704	0.119092	0.0005	0.0005	-0.343294	2.76065	2.28547	0	0.00017364	0.0451621	0.00217171	0	0.5	0.00282323
0.4582	0.119092	0.0005	0.0005	-0.344408	2.76124	2.28499	0	0.000226105	0.0452284	0.00220382	0	0.5	0.00286497
0.45936	0.119092	0.0005	0.0005	-0.346066	2.76183	2.2845	0	0.000278673	0.0453172	0.00221655	0	0.5	0.00288152
0.46052	0.118799	0.0005	0.0005	-0.348207	2.76241	2.28402	-0.252559	0.000331366	0.045425	0.00220986	0	0.5	0.00287282
0.46168	0.118506	0.0005	0.0005	-0.350093	2.763	2.28354	-0.252559	0.000497976	0.143629	0.00218371	0	0.5	0.00283882
0.46284	0.118506	0.0005	0.0005	-0.350882	2.76358	2.28306	-3.58908e-14	0.000778578	0.241898	0.00209384	0	0.5	0.00272199
0.464	0.11748	0.0005	0.0005	-0.34947	2.76417	2.28258	-0.883957	0.00105953	0.242201	0.00189595	0	0.5	0.00246474
0.46516	0.119092	0.0005	0.0005	-0.34837	2.76475	2.2821	1.38908	0.00173915	0.585878	0.00158981	0	0.5	0.00206675
0.46632	0.119092	0.0005	0.0005	-0.347927	2.76533	2.28162	0	0.00179383	0.0471362	0.00102047	0	0.5	0.00132662
0.46748	0.118652	0.0005	0.0005	-0.348013	2.76592	2.28114	-0.378839	0.00184931	0.0478328	0.000430364	0	0.5	0.000559473
0.46864	0.119385	0.0005	0.0005	-0.348043	2.7665	2.28066	0.631398	0.00207628	0.195665	-0.000181099	0	0.5	-0.000235429
0.4698	0.120117	0.0005	0.0005	-0.347784	2.76708	2.28018	0.631398	0.00201977	-0.048719	-0.000880783	0	0.5	-0.00114502
0.47096	0.119385	0.0005	0.0005	-0.346907	2.76766	2.2797	-0.631398	0.00167975	-0.293123	-0.00155892	0	0.5	-0.00202659
0.47212	0.12041	0.0005	0.0005	-0.346229	2.76824	2.27922	0.883958	0.0016249	-0.047281	-0.00210571	0	0.5	-0.00273743
0.47328	0.120996	0.0005	0.0005	-0.34645	2.76882	2.27875	0.505119	0.0011726	-0.389916	-0.00263216	0	0.5	-0.00342181
0.47444	0.118945	0.0005	0.0005	-0.346859	2.7694	2.27827	-1.76791	0.000493289	-0.585612	-0.00298415	0	0.5	-0.0038794
0.4756	0.119238	0.0005	0.0005	-0.347432	2.76998	2.2778	0.252559	0.000610576	0.101109	-0.00307369	0	0.5	-0.0039958
0.47676	0.119531	0.0005	0.0005	-0.34769	2.77056	2.27732	0.252559	0.000614371	0.00327155	-0.00321017	0	0.5	-0.00417322
0.47792	0.119238	0.0005	0.0005	-0.347352	2.77113	2.27684	-0.252559	0.000504674	-0.0945664	-0.00334956	0	0.5	-0.00435442
0.47908	0.120117	0.0005	0.0005	-0.347077	2.77171	2.27637	0.757678	0.000508973	0.00370603	-0.00344786	0	0.5	-0.00448222
0.48024	0.12041	0.0005	0.0005	-0.347779	2.77229	2.2759	0.252559	0.000172197	-0.290324	-0.00354938	0	0.5	-0.0046142
0.4814	0.118652	0.0005	0.0005	-0.348754	2.77286	2.27542	-1.51536	-0.000278268	-0.388332	-0.00352173	0	0.5	-0.00457825
0.48256	0.117188	0.0005	0.0005	-0.349734	2.77344	2.27495	-1.2628	-4.62526e-05	0.199972	-0.00332073	0	0.5	-0.00431695
0.48372	0.118945	0.0005	0.0005	-0.349947	2.77401	2.27448	1.51536	0.000754581	0.690415	-0.00321131	0	0.5	-0.0041747
0.48488	0.118799	0.0005	0.0005	-0.349494	2.77459	2.274	-0.12628	0.000873148	0.102213	-0.00341434	0	0.5	-0.00443864
0.48604	0.119238	0.0005	0.0005	-0.345144	2.77516	2.27353	0.378839	0.00104899	0.15159	-0.00366494	0	0.5	-0.00476443
0.4872	0.119092	0.0005	0.0005	-0.337982	2.77573	2.27306	-0.12628	0.00105466	0.00488362	-0.00398549	0	0.5	-0.00518114
0.48836	0.119971	0.0005	0.0005	-0.33138	2.7763	2.27259	0.757678	0.00111768	0.054331	-0.00431003	0	0.5	-0.00560304
0.48952	0.119385	0.0005	0.0005	-0.32538	2.77688	2.27212	-0.505119	0.000839905	-0.239462	-0.00466099	0	0.5	-0.00605928
0.49068	0.118066	0.0005	0.0005	-0.319702	2.77745	2.27165	-1.13652	0.000790043	-0.0429845	-0.00490617	0	0.5	-0.00637802
0.49184	0.122461	0.0005	0.0005	-0.313161	2.77802	2.27118	3.78839	0.00125249	0.398663	-0.00513421	0	0.5	-0.00667447
0.493	0.121436	0.0005	0.0005	-0.306575	2.77859	2.27071	-0.883957	8.9882e-06	-1.07198	-0.00554414	0	0.5	-0.00720738
0.49416	0.118066	0.0005	0.0005	-0.300148	2.77916	2.27024	-2.90443	-0.000836324	-0.728719	-0.00547368	0	0.5	-0.00711578
0.49532	0.119678	0.0005	0.0005	-0.29462	2.77973	2.26977	1.38908	-0.000373684	0.398828	-0.00507742	0	0.5	-0.00660065
0.49648	0.119385	0.0005	0.0005	-0.290568	2.78029	2.26931	-0.252559	-0.000536934	-0.140733	-0.00486311	0	0.5	-0.00632205
0.49764	0.11792	0.0005	0.0005	-0.286321	2.78086	2.26884	-1.2628	-0.000586659	-0.0428664	-0.0045876	0	0.5	-0.00596388
0.4988	0.118213	0.0005	0.0005	-0.281871	2.78143	2.26837	0.252559	-6.78096e-05	0.447292	-0.00429484	0	0.5	-0.0055833
0.49996	0.120557	0.0005	0.0005	-0.27673	2.78199	2.26791	2.02047	0.000337242	0.349174	-0.00420551	0	0.5	-0.00546716
0.50112	0.119531	0.0005	0.0005	-0.272117	2.78256	2.26744	-0.883957	-0.000167697	-0.435292	-0.00427536	0	0.5	-0.00555797
0.50228	0.118506	0.0005	0.0005	-0.268894	2.78312	2.26698	-0.883957	-0.000274524	-0.0920922	-0.00415105	0	0.5	-0.00539637
0.50344	0.120117	0.0005	0.0005	-0.265662	2.78369	2.26651	1.38908	1.67123e-05	0.251055	-0.00398713	0	0.5	-0.00518327
0.5046	0.119238	0.0005	0.0005	-0.262807	2.78425	2.26605	-0.757678	-0.000317766	-0.288333	-0.0039381	0	0.5	-0.00511952
0.50576	0.119238	0.0005	0.0005	-0.259959	2.78482	2.26558	0	-0.000311085	0.00575948	-0.00376095	0	0.5	-0.00488924
0.50692	0.119092	0.0005	0.0005	-0.256589	2.78538	2.26512	-0.12628	-0.000304544	0.00563879	-0.0035881	0	0.5	-0.00466453
0.50808	0.118799	0.0005	0.0005	-0.251028	2.78594	2.26466	-0.252559	-0.000241256	0.0545586	-0.0034194	0	0.5	-0.00444522
0.50924	0.119385	0.0005	0.0005	-0.246329	2.7865	2.2642	0.505119	-6.4309e-05	0.152548	-0.00327682	0	0.5	-0.00425986
0.5104	0.119238	0.0005	0.0005	-0.242307	2.78706	2.26373	-0.12628	-0.000114926	-0.0436431	-0.00320443	0	0.5	-0.00416576
0.51156	0.120264	0.0005	0.0005	-0.238242	2.78762	2.26327	0.883957	-0.000108712	0.0053569	-0.00311383	0	0.5	-0.00404797
0.51272	0.118213	0.0005	0.0005	-0.234508	2.78818	2.26281	-1.76791	-0.000500733	-0.337949	-0.00302704	0	0.5	-0.00393515
0.51388	0.119971	0.0005	0.0005	-0.229673	2.78874	2.26235	1.51536	-9.66062e-05	0.348391	-0.00278938	0	0.5	-0.00362619
0.51504	0.118945	0.0005	0.0005	-0.224286	2.7893	2.26189	-0.883957	-0.000375129	-0.240111	-0.00270991	0	0.5	-0.00352289
0.5162	0.119238	0.0005	0.0005	-0.219685	2.78986	2.26143	0.252559	-0.000255634	0.103013	-0.00252351	0	0.5	-0.00328056
0.51736	0.119385	0.0005	0.0005	-0.217449	2.79041	2.26098	0.12628	-0.000250021	0.00483879	-0.00238464	0	0.5	-0.00310004
0.51852	0.119238	0.0005	0.0005	-0.215422	2.79097	2.26052	-0.12628	-0.000301405	-0.0442966	-0.00224903	0	0.5	-0.00292374
0.51968	0.119238	0.0005	0.0005	-0.213328	2.79153	2.26006	0	-0.000296041	0.00462414	-0.00209448	0	0.5	-0.00272283
0.52084	0.118945	0.0005	0.0005	-0.210707	2.79208	2.2596	-0.252559	-0.000290811	0.00450862	-0.00194296	0	0.5	-0.00252584
0.522	0.120703	0.0005	0.0005	-0.207207	2.79264	2.25915	1.51536	-0.000171943	0.102472	-0.00179434	0	0.5	-0.00233264
0.52316	0.119238	0.0005	0.0005	-0.204377	2.79319	2.25869	-1.2628	-0.00073576	-0.486049	-0.00169269	0	0.5	-0.00220049
0.52432	0.119385	0.0005	0.0005	-0.202615	2.79374	2.25823	0.12628	-0.000731069	0.00404397	-0.00137285	0	0.5	-0.00178471
0.52548	0.119531	0.0005	0.0005	-0.201391	2.7943	2.25778	0.12628	-0.000783591	-0.0452776	-0.00105546	0	0.5	-0.00137209
0.52664	0.118652	0.0005	0.0005	-0.200201	2.79485	2.25733	-0.757678	-0.000893351	-0.0946207	-0.000718143	0	0.5	-0.000933586
0.5278	0.118799	0.0005	0.0005	-0.198274	2.7954	2.25687	0.12628	-0.000662209	0.19926	-0.000338529	0	0.5	-0.000440088
0.52896	0.119678	0.0005	0.0005	-0.195213	2.79595	2.25642	0.757678	-0.000488249	0.149966	-4.88265e-05	0	0.5	-6.34745e-05
0.53012	0.119238	0.0005	0.0005	-0.19001	2.7965	2.25597	-0.378839	-0.000655813	-0.144452	0.000173301	0	0.5	0.000225291
0.53128	0.119531	0.0005	0.0005	-0.185869	2.79705	2.25551	0.252559	-0.000653021	0.0024069	0.000460576	0	0.5	0.000598748
0.53244	0.119824	0.0005	0.0005	-0.182883	2.7976	2.25506	0.252559	-0.00076429	-0.0959216	0.000746974	0	0.5	0.000971066
0.5336	0.118359	0.0005	0.0005	-0.180281	2.79815	2.25461	-1.2628	-0.000989672	-0.194295	0.00107692	0	0.5	0.00139999
0.53476	0.118799	0.0005	0.0005	-0.176926	2.7987	2.25416	0.378839	-0.00064666	0.2957	0.00149487	0	0.5	0.00194333
0.53592	0.119092	0.0005	0.0005	-0.172606	2.79924	2.25371	0.252559	-0.000474592	0.148334	0.00178029	0	0.5	0.00231438
0.53708	0.119092	0.0005	0.0005	-0.167034	2.79979	2.25326	0	-0.000416505	0.050075	0.0019997	0	0.5	0.00259961
0.53824	0.118945	0.0005	0.0005	-0.162513	2.80034	2.25281	-0.12628	-0.000358605	0.0499138	0.00219745	0	0.5	0.00285668
0.5394	0.119238	0.0005	0.0005	-0.159835	2.80088	2.25236	0.252559	-0.000243984	0.0988112	0.0023737	0	0.5	0.00308581
0.54056	0.119238	0.0005	0.0005	-0.157254	2.80143	2.25191	0	-0.00024324	0.000641379	0.00250652	0	0.5	0.00325847
0.54172	0.119092	0.0005	0.0005	-0.154402	2.80197	2.25147	-0.12628	-0.000242605	0.000547414	0.00264017	0	0.5	0.00343222
0.54288	0.123779	0.0005	0.0005	-0.150931	2.80251	2.25102	4.04095	-0.000185196	0.0494905	0.00277477	0	0.5	0.0036072
0.54404	0.118945	0.0005	0.0005	-0.146333	2.80306	2.25057	-4.16723	-0.00194815	-1.51979	0.00288832	0	0.5	0.00375482
0.5452	0.119238	0.0005	0.0005	-0.141611	2.8036	2.25013	0.252559	-0.00183482	0.0977	0.00368778	0	0.5	0.00479412
0.54636	0.119385	0.0005	0.0005	-0.137951	2.80414	2.24968	0.12628	-0.00183609	-0.00108793	0.0044449	0	0.5	0.00577837
0.54752	0.119385	0.0005	0.0005	-0.134599	2.80468	2.24923	0	-0.00189506	-0.0508388	0.0052045	0	0.5	0.00676585
0.54868	0.119238	0.0005	0.0005	-0.131053	2.80522	2.24879	-0.12628	-0.00195489	-0.051575	0.00598935	0	0.5	0.00778615
0.54984	0.119092	0.0005	0.0005	-0.126829	2.80576	2.24835	-0.12628	-0.00195871	-0.00329655	0.00680013	0	0.5	0.00884017
0.551	0.119092	0.0005	0.0005	-0.121801	2.8063	2.2479	0	-0.00190653	0.044981	0.00761546	0	0.5	0.00990009
0.55216	0.119678	0.0005	0.0005	-0.116497	2.80684	2.24746	0.505119	-0.00185521	0.0442405	0.00841395	0	0.5	0.0109381
0.55332	0.119092	0.0005	0.0005	-0.112335	2.80737	2.24702	-0.505119	-0.00203226	-0.152631	0.00919631	0	0.5	0.0119552
0.55448	0.118945	0.0005	0.0005	-0.10887	2.80791	2.24658	-0.12628	-0.0019827	0.042731	0.0100516	0	0.5	0.013067
0.55564	0.119531	0.0005	0.0005	-0.105193	2.80845	2.24613	0.505119	-0.00187714	0.0909991	0.0108921	0	0.5	0.0141597
0.5568	0.119385	0.0005	0.0005	-0.101183	2.80898	2.24569	-0.12628	-0.00199996	-0.105882	0.0116965	0	0.5	0.0152055
0.55796	0.119238	0.0005	0.0005	-0.0962663	2.80952	2.24525	-0.12628	-0.0020668	-0.0576198	0.012554	0	0.5	0.0163201
0.55912	0.119385	0.0005	0.0005	-0.0912181	2.81005	2.24481	0.12628	-0.00207769	-0.00938534	0.013443	0	0.5	0.0174759
0.56028	0.119385	0.0005	0.0005	-0.0871658	2.81059	2.24437	0	-0.00214639	-0.0592293	0.0143423	0	0.5	0.018645
0.56144	0.119238	0.0005	0.0005	-0.0841335	2.81112	2.24394	-0.12628	-0.00221606	-0.0600629	0.0152747	0	0.5	0.0198572
0.5626	0.116895	0.0005	0.0005	-0.0811479	2.81165	2.2435	-2.02047	-0.00222985	-0.0118862	0.0162411	0	0.5	0.0211135
0.56376	0.11543	0.0005	0.0005	-0.0774139	2.81218	2.24306	-1.2628	-0.0013345	0.771853	0.0172202	0	0.5	0.0223862
0.56492	0.114404	0.0005	0.0005	-0.0722657	2.81271	2.24262	-0.883957	0.000129085	1.26171	0.0178593	0	0.5	0.0232171
0.56608	0.119531	0.0005	0.0005	-0.0668407	2.81324	2.24219	4.41979	0.00199092	1.60503	0.0179381	0	0.5	0.0233195
0.56724	0.119385	0.0005	0.0005	-0.0617694	2.81377	2.24175	-0.12628	0.00186271	-0.110522	0.017302	0	0.5	0.0224926
0.5684	0.119824	0.0005	0.0005	-0.0576262	2.8143	2.24132	0.378839	0.00179223	-0.0607612	0.0167235	0	0.5	0.0217405
0.56956	0.118799	0.0005	0.0005	-0.0538524	2.81483	2.24088	-0.883958	0.0015519	-0.207178	0.0161799	0	0.5	0.0210338
0.57072	0.119092	0.0005	0.0005	-0.049739	2.81536	2.24045	0.252559	0.00171046	0.136689	0.0157369	0	0.5	0.0204579
0.57188	0.119531	0.0005	0.0005	-0.0446521	2.81588	2.24001	0.378839	0.00175602	0.0392776	0.0152394	0	0.5	0.0198112
0.57304	0.119092	0.0005	0.0005	-0.0395241	2.81641	2.23958	-0.378839	0.00163172	-0.107154	0.014731	0	0.5	0.0191504
0.5742	0.119971	0.0005	0.0005	-0.0352658	2.81694	2.23915	0.757678	0.00167881	0.0405922	0.0142776	0	0.5	0.0185609
0.57536	0.119092	0.0005	0.0005	-0.0314749	2.81746	2.23872	-0.757678	0.00138535	-0.252982	0.0138124	0	0.5	0.0179561
0.57652	0.119238	0.0005	0.0005	-0.0274424	2.81798	2.23828	0.12628	0.00143382	0.0417828	0.0134673	0	0.5	0.0175075
0.57768	0.119385	0.0005	0.0005	-0.0229339	2.81851	2.23785	0.12628	0.00142605	-0.00669828	0.0131094	0	0.5	0.0170423
0.57884	0.119531	0.0005	0.0005	-0.017688	2.81903	2.23742	0.12628	0.00136204	-0.0551819	0.0127605	0	0.5	0.0165887
0.58	0.119385	0.0005	0.0005	-0.0125237	2.81955	2.23699	-0.12628	0.00124176	-0.103691	0.0124422	0	0.5	0.0161749
0.58116	0.119238	0.0005	0.0005	-0.00834146	2.82007	2.23656	-0.12628	0.00117892	-0.0541716	0.0121762	0	0.5	0.0158291
0.58232	0.119385	0.0005	0.0005	-0.00470703	2.8206	2.23614	0.12628	0.00117349	-0.004675	0.0119401	0	0.5	0.0155221
0.58348	0.119092	0.0005	0.0005	-0.00104031	2.82112	2.23571	-0.252559	0.00111172	-0.0532578	0.0117115	0	0.5	0.0152249
0.58464	0.119385	0.0005	0.0005	0.00350255	2.82164	2.23528	0.252559	0.00116421	0.0452491	0.0115121	0	0.5	0.0149657
0.5858	0.118652	0.0005	0.0005	0.00882158	2.82215	2.23485	-0.631398	0.00110345	-0.0523733	0.0112975	0	0.5	0.0146868
0.58696	0.119238	0.0005	0.0005	0.0143891	2.82267	2.23443	0.505119	0.00132761	0.193243	0.0111116	0	0.5	0.0144451
0.58812	0.119385	0.0005	0.0005	0.0194346	2.82319	2.234	0.12628	0.00132484	-0.00239224	0.0108437	0	0.5	0.0140968
0.58928	0.118652	0.0005	0.0005	0.02381	2.82371	2.23358	-0.631398	0.00126578	-0.0509147	0.0105818	0	0.5	0.0137563
0.59044	0.119531	0.000613284	0.000661959	0.0281656	2.82422	2.23315	0.757678	0.00149171	0.194765	0.0103475	0.471254	0.971254	0.0134518
0.5916	0.119238	0.000617139	0.000655783	0.0326011	2.82474	2.23273	-0.252559	0.001377	-0.0988819	0.0100302	0.477435	0.977435	0.0130392
0.59276	0.120557	0.00063047	0.000658977	0.0378259	2.82525	2.2323	1.13652	0.00137669	-0.000272414	0.0097619	0.484135	0.984135	0.0126905
0.59392	0.119385	0.000643936	0.000660818	0.0436738	2.82577	2.23188	-1.01024	0.000865036	-0.441078	0.00949815	0.491434	0.991434	0.0123476
0.59508	0.118359	0.000657816	0.000662958	0.0496025	2.82628	2.23146	-0.883957	0.000808846	-0.0484397	0.00943737	0.497697	0.997697	0.0122686
0.59624	0.119238	0.000664145	0.000656873	0.0552145	2.82679	2.23104	0.757678	0.00115121	0.29514	0.00940265	0.5035	1.0035	0.0122234
0.5974	0.119385	0.000670348	0.00065081	0.060756	2.8273	2.23061	0.12628	0.00115279	0.00135948	0.00923923	0.50994	1.00994	0.012011
0.59856	0.119238	0.000681102	0.000649164	0.0667104	2.82782	2.23019	-0.12628	0.001098	-0.0472302	0.00907935	0.516774	1.01677	0.0118032
0.59972	0.119238	0.000700262	0.000656059	0.0732696	2.82833	2.22977	0	0.00110059	0.00223362	0.00894484	0.524073	1.02407	0.0116283
0.60088	0.119531	0.000719037	0.000662151	0.0799715	2.82884	2.22935	0.252559	0.00110368	0.00266121	0.00881335	0.531498	1.0315	0.0114574
0.60204	0.119385	0.000737987	0.000668266	0.086749	2.82934	2.22893	-0.12628	0.000993492	-0.0949862	0.00868463	0.538984	1.03898	0.01129
0.6032	0.119824	0.000748871	0.00066616	0.0929567	2.82985	2.22852	0.378839	0.00094064	-0.0455621	0.00860261	0.545642	1.04564	0.0111834
0.60436	0.121143	0.000754169	0.000661055	0.0976592	2.83036	2.2281	1.13652	0.00071756	-0.19231	0.00854499	0.550662	1.05066	0.0111085
0.60552	0.119385	0.000762406	0.000658173	0.102888	2.83087	2.22768	-1.51536	-1.71524e-05	-0.633414	0.00857785	0.55571	1.05571	0.0111512
0.60668	0.119531	0.00077716	0.000662461	0.10836	2.83137	2.22726	0.12628	-6.92655e-05	-0.0449138	0.0088999	0.559411	1.05941	0.0115699
0.60784	0.119678	0.000791565	0.000665399	0.114217	2.83188	2.22685	0.12628	-0.000178294	-0.0939603	0.00924619	0.563363	1.06336	0.0120201
0.609	0.117773	0.000805901	0.000668636	0.119917	2.83238	2.22643	-1.64164	-0.000344286	-0.143097	0.00963897	0.566903	1.0669	0.0125307
0.61016	0.119092	0.000815227	0.000664477	0.126206	2.83289	2.22602	1.13652	0.000229057	0.494261	0.0101006	0.570653	1.07065	0.0131307
0.61132	0.12041	0.000818447	0.000653469	0.132321	2.83339	2.2256	1.13652	0.000290548	0.0530095	0.010344	0.575429	1.07543	0.0134473
0.61248	0.11792	0.00082381	0.000644406	0.138686	2.83389	2.22519	-2.14675	-0.000159785	-0.388218	0.0105683	0.580561	1.08056	0.0137388
0.61364	0.116748	0.000835168	0.000640033	0.146061	2.8344	2.22478	-1.01024	0.000356836	0.445363	0.0109722	0.585714	1.08571	0.0142639
0.6148	0.119092	0.000849777	0.000634573	0.155478	2.8349	2.22436	2.02047	0.00132869	0.837804	0.0111804	0.593985	1.09399	0.0145346
0.61596	0.119971	0.000864619	0.000629125	0.165004	2.8354	2.22395	0.757678	0.001391	0.0537155	0.0110163	0.604414	1.10441	0.0143212
0.61712	0.119385	0.000883275	0.000628085	0.174586	2.8359	2.22354	-0.505119	0.00111263	-0.239972	0.010833	0.615005	1.115	0.0140828
0.61828	0.119092	0.000894756	0.000619905	0.183589	2.8364	2.22313	-0.252559	0.0010623	-0.0433879	0.0107626	0.624395	1.12439	0.0139913
0.61944	0.119092	0.000906489	0.000612279	0.192487	2.8369	2.22272	0	0.00112622	0.0551	0.0107166	0.633546	1.13355	0.0139315
0.6206	0.119238	0.000923156	0.000609604	0.201767	2.83739	2.22231	0.12628	0.00119064	0.0555371	0.0106506	0.643188	1.14319	0.0138458
0.62176	0.119238	0.000948336	0.000615177	0.211825	2.83789	2.2219	0	0.00119872	0.00696121	0.0105644	0.653721	1.15372	0.0137337
0.62292	0.119971	0.00097242	0.000619927	0.221683	2.83839	2.22149	0.631398	0.00120733	0.00742672	0.0104798	0.664044	1.16404	0.0136237
0.62408	0.119385	0.000997066	0.000626333	0.231137	2.83888	2.22108	-0.505119	0.00093207	-0.237293	0.0103966	0.673955	1.17396	0.0135156
0.62524	0.118066	0.00101486	0.000625872	0.240058	2.83938	2.22068	-1.13652	0.000884766	-0.0407793	0.0104249	0.682721	1.18272	0.0135524
0.6264	0.119092	0.00102802	0.000619645	0.249078	2.83987	2.22027	0.883957	0.00134981	0.400903	0.0104764	0.691458	1.19146	0.0136193
0.62756	0.119238	0.00104534	0.000617271	0.258553	2.84037	2.21986	0.12628	0.00141728	0.0581638	0.0103519	0.701617	1.20162	0.0134575
0.62872	0.118799	0.00107095	0.000622325	0.269037	2.84086	2.21946	-0.378839	0.00142851	0.00967586	0.010206	0.712904	1.2129	0.0132677
0.62988	0.119531	0.00109552	0.00062601	0.279574	2.84135	2.21905	0.631398	0.00161103	0.157344	0.0100602	0.724242	1.22424	0.0130783
0.63104	0.119531	0.00112016	0.000629977	0.290028	2.84184	2.21865	0	0.00150985	-0.087219	0.00984813	0.735863	1.23586	0.0128026
0.6322	0.119092	0.00114103	0.00062818	0.301008	2.84233	2.21824	-0.378839	0.00140936	-0.0866328	0.00967977	0.747769	1.24777	0.0125837
0.63336	0.120703	0.00115704	0.000621167	0.311752	2.84282	2.21784	1.38908	0.00148015	0.0610276	0.0095548	0.7592	1.2592	0.0124212
0.63452	0.119531	0.00117452	0.000616635	0.322196	2.84331	2.21744	-1.01024	0.000925887	-0.477814	0.00940664	0.77046	1.27046	0.0122286
0.63568	0.119385	0.00119871	0.000618704	0.333209	2.8438	2.21704	-0.12628	0.000827112	-0.0851509	0.00947795	0.78108	1.28108	0.0123213
0.63684	0.119385	0.00122081	0.000618852	0.343991	2.84429	2.21664	0	0.000785593	-0.0357922	0.00959189	0.791235	1.29124	0.0124695
0.638	0.119238	0.00124276	0.00061873	0.35481	2.84477	2.21623	-0.12628	0.000744427	-0.0354879	0.00972627	0.801316	1.30132	0.0126441
0.63916	0.119092	0.00127089	0.000624386	0.366284	2.84526	2.21583	-0.12628	0.000760481	0.0138397	0.00988102	0.811938	1.31194	0.0128453
0.64032	0.119092	0.0012934	0.000624275	0.377372	2.84575	2.21544	0	0.000833762	0.0631733	0.010034	0.822185	1.32219	0.0130442
0.64148	0.118945	0.00131799	0.00062582	0.3888	2.84623	2.21504	-0.12628	0.000907418	0.0634966	0.010163	0.832904	1.3329	0.0132119
0.64264	0.119678	0.00134797	0.000632597	0.400719	2.84672	2.21464	0.631398	0.00103837	0.112886	0.010268	0.844245	1.34424	0.0133484
0.6438	0.118652	0.00137566	0.000636634	0.412642	2.8472	2.21424	-0.883957	0.000885363	-0.131899	0.0103268	0.855844	1.35584	0.0134248
0.64496	0.118066	0.00140328	0.000639035	0.4252	2.84768	2.21384	-0.505119	0.00113095	0.211709	0.0104496	0.867727	1.36773	0.0135845
0.64612	0.118945	0.00143659	0.000646397	0.438513	2.84816	2.21345	0.757678	0.00160457	0.4083	0.0104818	0.880863	1.38086	0.0136264
0.64728	0.118359	0.00146408	0.000647728	0.451452	2.84864	2.21305	-0.505119	0.00173762	0.114696	0.0103348	0.894611	1.39461	0.0134353
0.64844	0.119238	0.00148769	0.000646326	0.46361	2.84912	2.21266	0.757678	0.00209899	0.311522	0.0101408	0.907835	1.40784	0.013183
0.6496	0.119238	0.00151593	0.000649065	0.476339	2.8496	2.21226	0	0.00212	0.0181103	0.009811	0.922379	1.42238	0.0127543
0.65076	0.118506	0.00154361	0.000650447	0.48935	2.85008	2.21187	-0.631398	0.00214196	0.0189336	0.00947748	0.937224	1.43722	0.0123207
0.65192	0.119385	0.00157706	0.000656247	0.503372	2.85056	2.21147	0.757678	0.00244931	0.264954	0.00913969	0.953103	1.4531	0.0118816
0.65308	0.12085	0.00160612	0.000656569	0.517497	2.85104	2.21108	1.2628	0.00241645	-0.0283216	0.00868668	0.96972	1.46972	0.0112927
0.65424	0.119385	0.00163053	0.000653339	0.530805	2.85151	2.21069	-1.2628	0.00181585	-0.517761	0.00825033	0.985428	1.48543	0.0107254
0.6554	0.119238	0.00165883	0.000653702	0.544537	2.85199	2.2103	-0.12628	0.0017849	-0.0266776	0.00805093	1.00026	1.50026	0.0104662
0.65656	0.119092	0.00168387	0.000649961	0.558365	2.85247	2.2099	-0.12628	0.00181164	0.0230526	0.00786717	1.0151	1.5151	0.0102273
0.65772	0.119824	0.00170732	0.000644039	0.572311	2.85294	2.20951	0.631398	0.00189609	0.0727948	0.00767658	1.03009	1.53009	0.00997955
0.65888	0.119385	0.00173469	0.000641982	0.586587	2.85341	2.20912	-0.378839	0.00169696	-0.171659	0.00745665	1.04558	1.54558	0.00969364
0.66004	0.119238	0.00176957	0.000646812	0.601708	2.85389	2.20874	-0.12628	0.00166925	-0.0238862	0.0073174	1.06146	1.56146	0.00951262
0.6612	0.120264	0.00180014	0.000646986	0.616637	2.85436	2.20835	0.883957	0.00169918	0.0258	0.00719221	1.07708	1.57708	0.00934988
0.66236	0.119238	0.00183385	0.000651026	0.631511	2.85483	2.20796	-0.883957	0.00133169	-0.316804	0.00705864	1.09269	1.59269	0.00917623
0.66352	0.118945	0.00186521	0.000650685	0.647038	2.8553	2.20757	-0.252559	0.00136298	0.0269767	0.00707096	1.10815	1.60815	0.00919224
0.66468	0.119238	0.00189534	0.000648439	0.662745	2.85577	2.20719	0.252559	0.00150866	0.125582	0.00707431	1.12384	1.62384	0.0091966
0.66584	0.119531	0.00192342	0.000641811	0.679254	2.85624	2.2068	0.252559	0.00154124	0.0280922	0.00702427	1.14062	1.64062	0.00913155
0.667	0.119385	0.00194865	0.000632449	0.695487	2.85671	2.20641	-0.12628	0.00146076	-0.0693853	0.00696475	1.15718	1.65718	0.00905417
0.66816	0.119678	0.00197625	0.000625571	0.711863	2.85718	2.20603	0.252559	0.00143781	-0.0197793	0.00693962	1.17369	1.67369	0.0090215
0.66932	0.119385	0.00201009	0.000624749	0.728805	2.85764	2.20564	-0.252559	0.00130175	-0.117297	0.00692652	1.19071	1.69071	0.00900448
0.67048	0.119092	0.00203947	0.00061926	0.745477	2.85811	2.20526	-0.252559	0.00128004	-0.0187164	0.00696938	1.20715	1.70715	0.0090602
0.67164	0.119238	0.00206603	0.000610476	0.762131	2.85857	2.20488	0.12628	0.00137267	0.0798569	0.00702381	1.2235	1.7235	0.00913096
0.6728	0.119092	0.00209778	0.000606367	0.779401	2.85904	2.2045	-0.12628	0.00140904	0.0313517	0.00704544	1.24065	1.74065	0.00915907
0.67396	0.119238	0.00212565	0.000598133	0.796466	2.8595	2.20411	0.12628	0.00150293	0.0809371	0.00705611	1.25766	1.75766	0.00917295
0.67512	0.119238	0.00215185	0.000589068	0.813056	2.85996	2.20373	0	0.00154061	0.0324828	0.00703351	1.27437	1.77437	0.00914356
0.67628	0.119385	0.0021841	0.000585768	0.830237	2.86043	2.20335	0.12628	0.00157898	0.033081	0.00699944	1.29174	1.79174	0.00909927
0.67744	0.118506	0.00222488	0.000587406	0.849568	2.86089	2.20297	-0.757678	0.00156118	-0.015344	0.00695362	1.31132	1.81132	0.00903971
0.6786	0.119385	0.00226266	0.000585186	0.86902	2.86135	2.20259	0.757678	0.00188539	0.27949	0.00691785	1.33097	1.83097	0.0089932
0.67976	0.119238	0.00230461	0.000586803	0.888935	2.86181	2.20221	-0.12628	0.00186914	-0.0140052	0.00675929	1.35176	1.85176	0.00878708
0.68092	0.119238	0.00234195	0.000583736	0.908518	2.86227	2.20184	0	0.00191062	0.0357586	0.00661009	1.37216	1.87216	0.00859311
0.68208	0.119238	0.00238074	0.000582583	0.928027	2.86273	2.20146	0	0.00195296	0.0365	0.00644776	1.39256	1.89256	0.00838208
0.68324	0.119238	0.00242596	0.000588016	0.947973	2.86318	2.20108	0	0.00199618	0.0372586	0.00627189	1.41348	1.91348	0.00815345
0.6844	0.119531	0.00248036	0.000602512	0.968694	2.86364	2.20071	0.252559	0.0020403	0.0380336	0.00608206	1.43524	1.93524	0.00790667
0.68556	0.119092	0.00253161	0.000614256	0.989	2.8641	2.20033	-0.378839	0.00197157	-0.0592491	0.00587783	1.45667	1.95667	0.00764119
0.68672	0.119385	0.00257836	0.000619678	1.0097	2.86455	2.19996	0.252559	0.00207438	0.0886293	0.00570295	1.47833	1.97833	0.00741384
0.68788	0.119092	0.00261924	0.000619606	1.02979	2.86501	2.19958	-0.252559	0.00206436	-0.00864052	0.00549071	1.49959	1.99959	0.00713792
0.68904	0.119385	0.00265977	0.000619814	1.04959	2.86546	2.19921	0.252559	0.00216903	0.0902371	0.00528484	1.52052	2.02052	0.00687029
0.6902	0.118799	0.00270603	0.000624975	1.07016	2.86591	2.19884	-0.505119	0.00216092	-0.00699655	0.0050407	1.54243	2.04243	0.0065529
0.69136	0.120996	0.00274951	0.000627119	1.09061	2.86637	2.19846	1.89419	0.00238131	0.189994	0.00480198	1.56419	2.06419	0.00624257
0.69252	0.118066	0.00277978	0.000617174	1.10955	2.86682	2.19809	-2.52559	0.00174952	-0.544649	0.00447984	1.58491	2.08491	0.00582379
0.69368	0.120703	0.00280373	0.000600634	1.12812	2.86727	2.19772	2.27303	0.00225619	0.436787	0.00440506	1.60389	2.10389	0.00572657
0.69484	0.120117	0.00282659	0.00058464	1.14593	2.86772	2.19735	-0.505119	0.00173997	-0.445017	0.0041355	1.62318	2.12318	0.00537616
0.696	0.119092	0.00285388	0.000574408	1.16353	2.86817	2.19698	-0.883957	0.00145207	-0.248191	0.00406828	1.64115	2.14115	0.00528876
0.69716	0.119092	0.00289	0.000572958	1.18185	2.86862	2.19661	0	0.00156301	0.0956379	0.00411469	1.65922	2.15922	0.00534909
0.69832	0.119092	0.00292919	0.000570668	1.20202	2.86906	2.19624	0	0.00167466	0.0962448	0.00411987	1.67936	2.17936	0.00535582
0.69948	0.118799	0.00295636	0.000555987	1.2214	2.86951	2.19588	-0.252559	0.00178705	0.0968957	0.00408355	1.69894	2.19894	0.00530861
0.70064	0.118945	0.00297564	0.00053386	1.23997	2.86996	2.19551	0.12628	0.00201403	0.195665	0.00400542	1.71794	2.21794	0.00520704
0.7018	0.119971	0.00299308	0.000510873	1.258	2.8704	2.19514	0.883957	0.00218502	0.147409	0.00384096	1.73688	2.23688	0.00499324
0.70296	0.123193	0.0030142	0.000491966	1.27615	2.87085	2.19478	2.77815	0.00195881	-0.195007	0.00361182	1.75629	2.25629	0.00469537
0.70412	0.118945	0.00304422	0.000481254	1.2953	2.87129	2.19441	-3.66211	0.00048204	-1.27308	0.00347216	1.7762	2.2762	0.0045138
0.70528	0.121582	0.00308619	0.000481758	1.31568	2.87173	2.19405	2.27303	0.000655119	0.149206	0.00390753	1.79419	2.29419	0.00507979
0.70644	0.118799	0.00312583	0.000476704	1.33721	2.87217	2.19368	-2.39931	-0.000195417	-0.733221	0.00427745	1.81368	2.31368	0.00556068
0.7076	0.119678	0.00315709	0.000463618	1.35794	2.87262	2.19332	0.757678	3.4752e-05	0.198463	0.00497958	1.83055	2.33055	0.00647345
0.70876	0.120557	0.00318386	0.000447717	1.37762	2.87306	2.19296	0.757678	-7.63662e-05	-0.0958621	0.00559456	1.84685	2.34685	0.00727292
0.70992	0.117334	0.00321274	0.000434493	1.39724	2.8735	2.1926	-2.77815	-0.000528822	-0.390019	0.00625523	1.86284	2.36284	0.00813181
0.71108	0.118945	0.00324896	0.000428613	1.41743	2.87393	2.19224	1.38908	0.000269929	0.688578	0.00709442	1.87841	2.37841	0.00922274
0.71224	0.119385	0.00329612	0.000432824	1.43884	2.87437	2.19187	0.378839	0.000443079	0.149267	0.00762662	1.89689	2.39689	0.00991461
0.7134	0.117627	0.00334132	0.000434481	1.46033	2.87481	2.19151	-1.51536	0.000445777	0.00232586	0.00809502	1.9158	2.4158	0.0105235
0.71456	0.118506	0.00337412	0.000422313	1.48144	2.87525	2.19116	0.757678	0.00113128	0.590953	0.00856602	1.93432	2.43432	0.0111358
0.71572	0.119092	0.00340032	0.000403187	1.50217	2.87568	2.1908	0.505119	0.00147599	0.297166	0.00877468	1.95391	2.45391	0.0114071
0.71688	0.119385	0.00342763	0.000385343	1.52292	2.87612	2.19044	0.252559	0.00159384	0.101587	0.00885342	1.97423	2.47423	0.0115094
0.71804	0.119092	0.00346045	0.000373721	1.54381	2.87655	2.19008	-0.252559	0.00159863	0.00413017	0.0088904	1.99492	2.49492	0.0115575
0.7192	0.119824	0.00350294	0.000371616	1.56552	2.87698	2.18973	0.631398	0.00171791	0.102827	0.00892952	2.01641	2.51641	0.0116084
0.72036	0.119238	0.00355675	0.000376552	1.58989	2.87742	2.18937	-0.505119	0.00155354	-0.141695	0.00892634	2.04079	2.54079	0.0116042
0.72152	0.119092	0.00359771	0.000368462	1.61332	2.87785	2.18901	-0.12628	0.00161741	0.0550595	0.00899101	2.06387	2.56387	0.0116883
0.72268	0.119385	0.00363135	0.000352839	1.63626	2.87828	2.18866	0.252559	0.00173889	0.104726	0.00903493	2.08657	2.58657	0.0117454
0.72384	0.119238	0.00366455	0.000337101	1.65903	2.87871	2.18831	-0.12628	0.00174739	0.007325	0.00903574	2.10934	2.60934	0.0117465
0.725	0.119092	0.003702	0.000326464	1.68179	2.87914	2.18795	-0.12628	0.00181356	0.0570414	0.00903733	2.13208	2.63208	0.0117485
0.72616	0.119238	0.00374811	0.000324773	1.70511	2.87957	2.1876	0.12628	0.00193742	0.106783	0.00901729	2.15552	2.65552	0.0117225
0.72732	0.119238	0.00380594	0.000334501	1.72947	2.87999	2.18725	0	0.00200528	0.0584983	0.00895321	2.18023	2.68023	0.0116392
0.72848	0.119238	0.00385076	0.000331183	1.75283	2.88042	2.1869	0	0.00207404	0.0592767	0.00886681	2.20406	2.70406	0.0115269
0.72964	0.119238	0.00388699	0.000319491	1.77542	2.88085	2.18655	0	0.00214374	0.0600819	0.00875771	2.22726	2.72726	0.011385
0.7308	0.118066	0.00392207	0.000306845	1.79785	2.88127	2.1862	-1.01024	0.0022144	0.0609147	0.00862549	2.25041	2.75041	0.0112131
0.73196	0.122607	0.00396152	0.00029846	1.82066	2.8817	2.18585	3.91467	0.00274113	0.454078	0.00846971	2.27407	2.77407	0.0110106
0.73312	0.119824	0.00400865	0.000298184	1.84389	2.88212	2.1855	-2.39931	0.00150569	-1.06503	0.0081132	2.29927	2.79927	0.0105472
0.73428	0.119385	0.00406624	0.000310415	1.86711	2.88254	2.18515	-0.378839	0.00135173	-0.132728	0.0082401	2.32179	2.82179	0.0107121
0.73544	0.119238	0.00411066	0.000310139	1.88902	2.88297	2.1848	-0.12628	0.00136902	0.0149112	0.00843051	2.34265	2.84265	0.0109597
0.7366	0.119238	0.00414194	0.000296806	1.90986	2.88339	2.18446	0	0.00144382	0.0644802	0.00861799	2.36246	2.86246	0.0112034
0.73776	0.119385	0.00417136	0.000281683	1.93052	2.88381	2.18411	0.12628	0.00151927	0.0650405	0.00878031	2.38223	2.88223	0.0114144
0.73892	0.119971	0.00420306	0.000269437	1.95112	2.88423	2.18376	0.505119	0.00153852	0.0165931	0.00891729	2.40207	2.90207	0.0115925
0.74008	0.119385	0.004242	0.000265285	1.97193	2.88465	2.18342	-0.505119	0.00133092	-0.17896	0.00905081	2.42215	2.92215	0.011766
0.74124	0.119238	0.00429177	0.000271701	1.99371	2.88506	2.18308	-0.12628	0.00135146	0.0177069	0.00926902	2.44273	2.94273	0.0120497
0.7424	0.119678	0.00434058	0.000269167	2.0187	2.88548	2.18273	0.378839	0.0014295	0.0672698	0.00948343	2.46654	2.96654	0.0123285
0.74356	0.121582	0.00437635	0.000253557	2.04268	2.8859	2.18239	1.64164	0.00133752	-0.0792879	0.0096718	2.48949	2.98949	0.0125733
0.74472	0.119385	0.00440816	0.000236413	2.06535	2.88631	2.18205	-1.89419	0.000506659	-0.716261	0.00990026	2.5109	3.0109	0.0128703
0.74588	0.120117	0.00444181	0.000221025	2.0882	2.88673	2.18171	0.631398	0.000529283	0.0195034	0.0104558	2.5307	3.0307	0.0135926
0.74704	0.118945	0.00448172	0.000212061	2.11147	2.88714	2.18137	-1.01024	0.000267726	-0.22548	0.0110073	2.55093	3.05093	0.0143095
0.7482	0.119385	0.00453173	0.00021309	2.13559	2.88755	2.18103	0.378839	0.000461361	0.166927	0.0116653	2.57143	3.07143	0.0151649
0.74936	0.119238	0.00458722	0.000216691	2.16133	2.88797	2.18069	-0.12628	0.000484551	0.0199914	0.0122534	2.59393	3.09393	0.0159294
0.75052	0.119092	0.00462977	0.000207192	2.18612	2.88838	2.18035	-0.12628	0.000564844	0.0692181	0.012838	2.61551	3.11551	0.0166894
0.75168	0.118506	0.00466821	0.000193663	2.21055	2.88879	2.18001	-0.505119	0.000702275	0.118475	0.0133972	2.63687	3.13687	0.0174163
0.75284	0.119531	0.00470778	0.000181596	2.23494	2.8892	2.17967	0.883957	0.00106756	0.314899	0.013909	2.65844	3.15844	0.0180817
0.754	0.119092	0.00475262	0.000175386	2.2595	2.88961	2.17934	-0.378839	0.00103514	-0.0279509	0.0142853	2.68093	3.18093	0.0185709
0.75516	0.119238	0.00480715	0.000178877	2.28481	2.89001	2.179	0.12628	0.00117383	0.119565	0.0146806	2.70407	3.20407	0.0190848
0.75632	0.119092	0.00487332	0.000190148	2.31263	2.89042	2.17866	-0.12628	0.00125617	0.0709828	0.0150286	2.72997	3.22997	0.0195372
0.75748	0.119092	0.00492696	0.000188308	2.33971	2.89083	2.17833	0	0.00139596	0.120508	0.0153515	2.75527	3.25527	0.0199569
0.75864	0.118799	0.00496837	0.000175281	2.36539	2.89123	2.178	-0.252559	0.00153638	0.12105	0.015627	2.77944	3.27944	0.020315
0.7598	0.119531	0.00500967	0.000161234	2.39144	2.89164	2.17766	0.631398	0.00179126	0.219722	0.0158549	2.80424	3.30424	0.0206114
0.76096	0.121875	0.00505501	0.000151383	2.41774	2.89204	2.17733	2.02047	0.00176252	-0.0247707	0.0159911	2.82979	3.32979	0.0207884
0.76212	0.119092	0.00510907	0.000150124	2.44479	2.89245	2.177	-2.39931	0.000824438	-0.808692	0.0161456	2.85598	3.35598	0.0209893
0.76328	0.125684	0.00517463	0.000159931	2.47291	2.89285	2.17667	5.68258	0.000967521	0.123347	0.0166717	2.88122	3.38122	0.0216732
0.76444	0.118213	0.00523632	0.000159913	2.50319	2.89325	2.17634	-6.44026	-0.00144874	-2.08298	0.0171497	2.90886	3.40886	0.0222946
0.7656	0.119092	0.0052851	0.00014677	2.53253	2.89365	2.17601	0.757678	-0.000964567	0.417387	0.0185738	2.93038	3.43038	0.0241459
0.76676	0.118799	0.00533253	0.000132044	2.56187	2.89405	2.17568	-0.252559	-0.000822136	0.122785	0.0198181	2.95287	3.45287	0.0257636
0.76792	0.119238	0.00538332	0.000120952	2.59136	2.89445	2.17535	0.378839	-0.000566307	0.220542	0.0210162	2.97577	3.47577	0.027321
0.76908	0.119385	0.00544161	0.000117888	2.62122	2.89485	2.17502	0.12628	-0.000481385	0.0732086	0.0221243	2.99954	3.49954	0.0287616
0.77024	0.119238	0.005511	0.000125326	2.6522	2.89524	2.1747	-0.12628	-0.000453564	0.0239836	0.0232094	3.02455	3.52455	0.0301722
0.7714	0.119385	0.00558106	0.00013282	2.68349	2.89564	2.17437	0.12628	-0.000369063	0.0728457	0.0242942	3.04987	3.54987	0.0315824
0.77256	0.120557	0.0056381	0.000127452	2.71368	2.89604	2.17404	1.01024	-0.000341613	0.0236638	0.0253571	3.07422	3.57422	0.0329642
0.77372	0.118945	0.00569176	0.000120218	2.74299	2.89643	2.17372	-1.38908	-0.000769387	-0.368771	0.0264208	3.09767	3.59767	0.034347
0.77488	0.119824	0.00574755	0.000115238	2.77241	2.89682	2.1734	0.757678	-0.000571785	0.170347	0.0276624	3.12027	3.62027	0.0359612
0.77604	0.118652	0.00581018	0.000116084	2.80279	2.89722	2.17307	-1.01024	-0.000715744	-0.124103	0.0288398	3.14417	3.64417	0.0374918
0.7772	0.119092	0.00588325	0.00012688	2.83419	2.89761	2.17275	0.378839	-0.000404955	0.267922	0.0300862	3.16872	3.66872	0.039112
0.77836	0.119092	0.0059569	0.000137734	2.86586	2.898	2.17243	0	-0.000264999	0.120652	0.0312253	3.19412	3.69412	0.0405929
0.77952	0.119678	0.00601796	0.000135454	2.89675	2.89839	2.17211	0.505119	-0.000125163	0.120548	0.0323242	3.21897	3.71897	0.0420215
0.78068	0.119238	0.00607085	0.000124437	2.92724	2.89878	2.17178	-0.378839	-0.000212919	-0.0756517	0.0333833	3.24364	3.74364	0.0433984
0.78184	0.119385	0.00612469	0.000114026	2.95795	2.89917	2.17146	0.12628	-0.000130119	0.0713793	0.0344916	3.26824	3.76824	0.0448391
0.783	0.119092	0.0061836	0.000108891	2.98897	2.89956	2.17115	-0.252559	-0.000104261	0.0222914	0.0355833	3.29326	3.79326	0.0462582
0.78416	0.122607	0.00625175	0.000112878	3.02076	2.89995	2.17083	3.03071	3.53169e-05	0.120311	0.0366809	3.31902	3.81902	0.0476851
0.78532	0.119531	0.00632065	0.000117192	3.05278	2.90033	2.17051	-2.65187	-0.0011903	-1.05655	0.0377408	3.34521	3.84521	0.0490631
0.78648	0.118359	0.00639031	0.000115235	3.08777	2.90072	2.17019	-1.01024	-0.0012219	-0.0272362	0.0392937	3.37165	3.87165	0.0510819
0.78764	0.118652	0.00645143	0.000104258	3.12228	2.9011	2.16988	0.252559	-0.000798969	0.364592	0.0408766	3.39746	3.89746	0.0531396
0.7888	0.119092	0.00651256	9.22279e-05	3.15723	2.90149	2.16956	0.378839	-0.000490169	0.266207	0.0423136	3.4245	3.9245	0.0550077
0.78996	0.121436	0.00657785	8.38143e-05	3.19273	2.90187	2.16924	2.02047	-0.000352243	0.118902	0.0436498	3.45265	3.95265	0.0567448
0.79112	0.119531	0.0066509	8.34122e-05	3.22873	2.90225	2.16893	-1.64164	-0.00112462	-0.66584	0.0449521	3.48149	3.98149	0.0584378
0.79228	0.117334	0.00672927	8.46977e-05	3.26665	2.90263	2.16862	-1.89419	-0.00115801	-0.0287845	0.0465746	3.51049	4.01049	0.060547
0.79344	0.12041	0.00680832	8.60218e-05	3.30489	2.90301	2.1683	2.65187	-0.00033866	0.706334	0.048231	3.53962	4.03962	0.0627003
0.7946	0.119531	0.00687627	7.74872e-05	3.34174	2.90339	2.16799	-0.757678	-0.000714028	-0.323593	0.049591	3.56899	4.06899	0.0644683
0.79576	0.118213	0.00694139	6.62387e-05	3.37833	2.90377	2.16768	-1.13652	-0.000748413	-0.0296422	0.0511191	3.59717	4.09717	0.0664548
0.79692	0.119385	0.00701031	5.77698e-05	3.41563	2.90415	2.16737	1.01024	-0.000271181	0.411407	0.0526835	3.62587	4.12587	0.0684886
0.79808	0.119385	0.00708554	5.62008e-05	3.45319	2.90452	2.16706	0	-0.000249143	0.0189983	0.0540864	3.65571	4.15571	0.0703123
0.79924	0.119385	0.00717069	6.48303e-05	3.49141	2.9049	2.16675	0	-0.000227216	0.0189026	0.055505	3.68613	4.18613	0.0721566
0.8004	0.119238	0.00725616	7.34895e-05	3.52978	2.90528	2.16644	-0.12628	-0.000205392	0.0188138	0.0569402	3.71661	4.21661	0.0740223
0.80156	0.118945	0.00733019	7.11847e-05	3.56704	2.90565	2.16613	-0.252559	-0.000126777	0.0677716	0.0583925	3.74589	4.24589	0.0759103
0.80272	0.12085	0.00739774	6.1489e-05	3.60418	2.90602	2.16582	1.64164	6.55496e-05	0.165756	0.0598406	3.77506	4.27506	0.0777928
0.80388	0.118945	0.00746792	5.34711e-05	3.64192	2.9064	2.16552	-1.64164	-0.000481585	-0.471625	0.061241	3.80509	4.30509	0.0796134
0.80504	0.116895	0.00754462	5.12514e-05	3.68047	2.90677	2.16521	-1.76791	-0.000289446	0.165637	0.0628815	3.83462	4.33462	0.0817459
0.8062	0.120117	0.00763089	5.84032e-05	3.71985	2.90714	2.16491	2.77815	0.000698936	0.852053	0.0644756	3.86523	4.36523	0.0838183
0.80736	0.119092	0.00771743	6.53068e-05	3.75946	2.90751	2.1646	-0.883957	0.000436188	-0.226507	0.065715	3.89802	4.39802	0.0854295
0.80852	0.119385	0.00780482	6.75663e-05	3.8014	2.90788	2.1643	0.252559	0.000571824	0.116928	0.067086	3.93243	4.43243	0.0872118
0.80968	0.120117	0.00788512	6.18834e-05	3.84314	2.90825	2.164	0.631398	0.00059395	0.0190741	0.0684346	3.96675	4.46675	0.0889649
0.81084	0.119824	0.00796608	5.62289e-05	3.88519	2.90861	2.16369	-0.252559	0.000331924	-0.225884	0.0698053	4.00126	4.50126	0.0907469
0.812	0.120557	0.00805185	5.49991e-05	3.92778	2.90898	2.16339	0.631398	0.000183815	-0.12768	0.0713093	4.03558	4.53558	0.0927021
0.81316	0.118799	0.0081455	6.20427e-05	3.97082	2.90935	2.16309	-1.51536	-0.000248631	-0.372798	0.0729029	4.06986	4.56986	0.0947738
0.81432	0.119531	0.00823909	6.85649e-05	4.01405	2.90971	2.16279	0.631398	1.41825e-06	0.215561	0.0746973	4.10322	4.60322	0.0971065
0.81548	0.119385	0.00833349	7.56682e-05	4.05745	2.91007	2.16249	-0.12628	-3.29515e-05	-0.0296724	0.0764283	4.13709	4.63709	0.0993568
0.81664	0.119531	0.00841996	7.4008e-05	4.10055	2.91044	2.16219	0.12628	-1.04522e-05	0.0193966	0.078207	4.17041	4.67041	0.101669
0.8178	0.119385	0.00850456	7.0732e-05	4.14341	2.9108	2.16189	-0.12628	-4.48414e-05	-0.029569	0.0800122	4.20334	4.70334	0.104016
0.81896	0.119971	0.00859312	7.10625e-05	4.18672	2.91116	2.1616	0.505119	-2.2367e-05	0.0193103	0.0818668	4.23646	4.73646	0.106427
0.82012	0.119531	0.00868926	7.91237e-05	4.23057	2.91152	2.1613	-0.378839	-0.000227438	-0.176757	0.0837496	4.26994	4.76994	0.108874
0.82128	0.119238	0.00878448	8.61212e-05	4.2744	2.91188	2.161	-0.252559	-0.00026196	-0.0297603	0.0857497	4.30278	4.80278	0.111475
0.82244	0.118945	0.00888048	9.2883e-05	4.31872	2.91224	2.16071	-0.252559	-0.000182832	0.0682138	0.0878019	4.33581	4.83581	0.114142
0.8236	0.119824	0.00897044	9.1439e-05	4.36345	2.9126	2.16041	0.757678	9.98066e-06	0.166217	0.0898628	4.3692	4.8692	0.116822
0.82476	0.118799	0.00905467	8.3713e-05	4.40796	2.91295	2.16012	-0.883957	-0.000138505	-0.128004	0.0918894	4.40256	4.90256	0.119456
0.82592	0.118945	0.009142	7.76747e-05	4.45329	2.91331	2.15983	0.12628	0.000111134	0.215206	0.094015	4.43621	4.93621	0.12222
0.82708	0.118945	0.0092366	7.71707e-05	4.49991	2.91367	2.15953	0	0.000303939	0.166211	0.0960861	4.47144	4.97144	0.124912
0.82824	0.118506	0.00933053	7.50522e-05	4.54687	2.91402	2.15924	-0.378839	0.000496882	0.16633	0.0981255	4.50718	5.00718	0.127563
0.8294	0.119971	0.00942522	7.26931e-05	4.5943	2.91437	2.15895	1.2628	0.000860699	0.313635	0.100134	4.54356	5.04356	0.130175
0.83056	0.119238	0.00952455	7.50411e-05	4.64207	2.91473	2.15866	-0.631398	0.000656066	-0.176408	0.102047	4.58081	5.08081	0.132661
0.83172	0.119531	0.00961786	7.02749e-05	4.68981	2.91508	2.15837	0.252559	0.000736148	0.0690362	0.104085	4.61734	5.11734	0.13531
0.83288	0.119678	0.00971342	6.69155e-05	4.73808	2.91543	2.15808	0.12628	0.000702793	-0.0287543	0.106139	4.65431	5.15431	0.13798
0.83404	0.118359	0.00981513	6.93605e-05	4.78697	2.91578	2.1578	-1.13652	0.000612871	-0.077519	0.108253	4.69158	5.19158	0.140729
0.8352	0.117334	0.00991726	6.88127e-05	4.83731	2.91613	2.15751	-0.883957	0.00103518	0.364059	0.110451	4.72982	5.22982	0.143587
0.83636	0.118799	0.0100196	6.77466e-05	4.88795	2.91647	2.15722	1.2628	0.00185614	0.707727	0.112535	4.769	5.269	0.146296
0.83752	0.118213	0.0101268	7.02856e-05	4.93952	2.91682	2.15694	-0.505119	0.0021091	0.218068	0.114351	4.81059	5.31059	0.148657
0.83868	0.119238	0.0102283	6.48834e-05	4.99153	2.91717	2.15665	0.883958	0.00259055	0.41504	0.11612	4.85287	5.35287	0.150956
0.83984	0.118799	0.0103307	5.97859e-05	5.04385	2.91751	2.15637	-0.378839	0.00267497	0.0727802	0.117755	4.8962	5.3962	0.153081
0.841	0.119531	0.0104386	5.91148e-05	5.0971	2.91786	2.15608	0.631398	0.00293125	0.220933	0.11941	4.94035	5.44035	0.155232
0.84216	0.119385	0.0105506	5.87457e-05	5.15219	2.9182	2.1558	-0.12628	0.00290444	-0.0231181	0.121019	4.98659	5.48659	0.157324
0.84332	0.120117	0.0106617	5.73037e-05	5.20728	2.91855	2.15552	0.631398	0.00293581	0.0270474	0.122693	5.03247	5.53247	0.1595
0.84448	0.118799	0.0107749	5.89123e-05	5.26218	2.91889	2.15524	-1.13652	0.00268409	-0.217002	0.12441	5.07793	5.57793	0.161732
0.84564	0.119238	0.0108822	5.25746e-05	5.3174	2.91923	2.15496	0.378839	0.00294553	0.225381	0.12628	5.12286	5.62286	0.164165
0.8468	0.119971	0.0109853	4.07623e-05	5.37289	2.91957	2.15468	0.631398	0.00303765	0.0794112	0.128107	5.16831	5.66831	0.166539
0.84796	0.120117	0.0110928	3.25431e-05	5.42899	2.91991	2.1544	0.12628	0.00284672	-0.164597	0.129955	5.21424	5.71424	0.168941
0.84912	0.117627	0.0112067	3.12123e-05	5.48544	2.92025	2.15412	-2.14675	0.00260018	-0.212531	0.131936	5.25979	5.75979	0.171516
0.85028	0.119385	0.0113187	2.82465e-05	5.54159	2.92058	2.15384	1.51536	0.00332184	0.622122	0.134071	5.30419	5.80419	0.174293
0.85144	0.121143	0.0114304	2.52938e-05	5.5976	2.92092	2.15356	1.51536	0.0033624	0.0349586	0.135988	5.34967	5.84967	0.176784
0.8526	0.119531	0.011549	2.81267e-05	5.65462	2.92126	2.15329	-1.38908	0.00272185	-0.55219	0.137949	5.3959	5.8959	0.179334
0.85376	0.117334	0.0116624	2.51989e-05	5.71151	2.92159	2.15301	-1.89419	0.00270826	-0.0117172	0.140222	5.44029	5.94029	0.182288
0.85492	0.120703	0.0117797	2.44825e-05	5.76931	2.92192	2.15274	2.90443	0.00354915	0.724903	0.142563	5.48522	5.98522	0.185332
0.85608	0.122754	0.011904	3.0376e-05	5.82786	2.92226	2.15246	1.76791	0.00308331	-0.40159	0.144641	5.53234	6.03234	0.188034
0.85724	0.118945	0.0120236	3.35343e-05	5.88525	2.92259	2.15219	-3.28327	0.00182248	-1.08692	0.146966	5.57693	6.07693	0.191056
0.8584	0.118213	0.0121432	3.58833e-05	5.94298	2.92292	2.15192	-0.631398	0.00204145	0.18877	0.149847	5.61883	6.11883	0.194801
0.85956	0.119238	0.012269	4.31978e-05	6.00169	2.92325	2.15165	0.883958	0.00254576	0.434752	0.15271	5.66179	6.16179	0.198522
0.86072	0.118799	0.01239	4.44836e-05	6.06053	2.92358	2.15137	-0.378839	0.00265303	0.092475	0.155445	5.70558	6.20558	0.202079
0.86188	0.119092	0.0125112	4.524e-05	6.11968	2.92391	2.1511	0.252559	0.00293215	0.240619	0.15821	5.74953	6.24953	0.205673
0.86304	0.119238	0.0126385	5.06911e-05	6.17987	2.92424	2.15083	0.12628	0.00309882	0.143682	0.160937	5.79471	6.29471	0.209218
0.8642	0.119385	0.0127622	5.25913e-05	6.23978	2.92456	2.15057	0.12628	0.00321	0.0958474	0.163672	5.83959	6.33959	0.212773
0.86536	0.118506	0.0128844	5.34159e-05	6.29938	2.92489	2.1503	-0.757678	0.00326575	0.048056	0.166437	5.88398	6.38398	0.216369
0.86652	0.12041	0.0130116	5.81142e-05	6.35989	2.92521	2.15003	1.64164	0.00366427	0.343552	0.169256	5.92898	6.42898	0.220033
0.86768	0.119092	0.013135	5.78901e-05	6.4205	2.92554	2.14976	-1.13652	0.00332495	-0.292518	0.171997	5.97452	6.47452	0.223595
0.86884	0.118652	0.013255	5.32936e-05	6.4813	2.92586	2.1495	-0.378839	0.00349908	0.150115	0.174946	6.01909	6.51909	0.22743
0.87	0.119531	0.0133801	5.20207e-05	6.54317	2.92618	2.14923	0.757678	0.00384544	0.298586	0.177907	6.06469	6.56469	0.231279
0.87116	0.119238	0.0135017	4.66477e-05	6.60504	2.9265	2.14897	-0.252559	0.00385223	0.00585259	0.180813	6.11057	6.61057	0.235057
0.87232	0.119238	0.0136209	3.93715e-05	6.66655	2.92682	2.1487	0	0.00397452	0.105424	0.183798	6.15566	6.65566	0.238938
0.87348	0.117773	0.0137445	3.65126e-05	6.72837	2.92714	2.14844	-1.2628	0.00409861	0.106967	0.186819	6.20086	6.70086	0.242865
0.87464	0.12041	0.0138761	4.08189e-05	6.79114	2.92746	2.14818	2.27303	0.00479337	0.598938	0.189875	6.24683	6.74683	0.246838
0.8758	0.120996	0.0140033	4.102e-05	6.85348	2.92778	2.14792	0.505119	0.00446639	-0.281882	0.192748	6.29337	6.79337	0.250572
0.87696	0.118359	0.0141342	4.53641e-05	6.91591	2.9281	2.14766	-2.27303	0.00391388	-0.476299	0.195834	6.33883	6.83883	0.254584
0.87812	0.119238	0.0142639	4.56049e-05	6.97944	2.92841	2.1474	0.757678	0.00438705	0.407903	0.199222	6.38372	6.88372	0.258989
0.87928	0.119385	0.0143894	4.31174e-05	7.04205	2.92873	2.14714	0.12628	0.00452089	0.115378	0.202517	6.42821	6.92821	0.263272
0.88044	0.119238	0.0145183	4.3949e-05	7.10492	2.92904	2.14688	-0.12628	0.00459988	0.0680966	0.205851	6.47274	6.97274	0.267606
0.8816	0.119092	0.014654	5.16743e-05	7.16835	2.92936	2.14662	-0.12628	0.00473783	0.11892	0.209247	6.51749	7.01749	0.272021
0.88276	0.119092	0.0147858	5.39245e-05	7.23207	2.92967	2.14636	0	0.00493479	0.169798	0.212684	6.56231	7.06231	0.276489
0.88392	0.119238	0.0149172	5.61995e-05	7.29561	2.92998	2.14611	0.12628	0.00513398	0.171715	0.21614	6.60684	7.10684	0.280982
0.88508	0.119238	0.0150547	6.31742e-05	7.36017	2.93029	2.14585	0	0.0052786	0.12467	0.219616	6.65228	7.15228	0.285501
0.88624	0.118652	0.0151883	6.63286e-05	7.42442	2.9306	2.1456	-0.505119	0.0054256	0.12672	0.223135	6.69718	7.19718	0.290075
0.8874	0.117773	0.0153206	6.89635e-05	7.48826	2.93091	2.14534	-0.757678	0.00580257	0.324978	0.226697	6.74143	7.24143	0.294706
0.88856	0.118945	0.0154591	7.63038e-05	7.55321	2.93121	2.14509	1.01024	0.00652346	0.621459	0.230215	6.78702	7.28702	0.29928
0.88972	0.118799	0.0155968	7.95549e-05	7.6194	2.93152	2.14484	-0.12628	0.00679222	0.23169	0.233557	6.83484	7.33484	0.303624
0.89088	0.119092	0.0157323	7.87182e-05	7.68621	2.93183	2.14459	0.252559	0.00712092	0.283364	0.2369	6.88326	7.38326	0.30797
0.89204	0.119238	0.0158733	8.14916e-05	7.75425	2.93213	2.14434	0.12628	0.00733907	0.188054	0.240221	6.93303	7.43303	0.312288
0.8932	0.118066	0.0160103	7.96281e-05	7.82224	2.93244	2.14409	-1.01024	0.00750363	0.141866	0.243567	6.98263	7.48263	0.316637
0.89436	0.119531	0.0161442	7.56015e-05	7.8896	2.93274	2.14384	1.2628	0.00812665	0.537083	0.246958	7.03134	7.53134	0.321045
0.89552	0.119092	0.0162833	7.68332e-05	7.95734	2.93304	2.14359	-0.378839	0.00818449	0.0498603	0.250218	7.08115	7.58115	0.325283
0.89668	0.119678	0.016431	8.57982e-05	8.0261	2.93334	2.14334	0.505119	0.00841666	0.200153	0.253568	7.13147	7.63147	0.329639
0.89784	0.119092	0.016576	9.09532e-05	8.09513	2.93364	2.14309	-0.505119	0.00842509	0.00726897	0.256943	7.18194	7.68194	0.334026
0.899	0.119385	0.0167253	9.8624e-05	8.16522	2.93394	2.14285	0.252559	0.00866486	0.206692	0.26043	7.23286	7.73286	0.338559
0.90016	0.119385	0.0168707	0.000100841	8.23566	2.93424	2.1426	0	0.00879476	0.111981	0.263942	7.28398	7.78398	0.343124
0.90132	0.119385	0.0170112	9.98045e-05	8.30502	2.93454	2.14236	0	0.00892862	0.115397	0.267521	7.33366	7.83366	0.347778
0.90248	0.119238	0.017156	0.000102663	8.37485	2.93483	2.14211	-0.12628	0.0090665	0.118864	0.27117	7.38341	7.88341	0.35252
0.90364	0.119238	0.0173083	0.000112716	8.44543	2.93513	2.14187	0	0.00926535	0.171422	0.274886	7.43355	7.93355	0.357352
0.9048	0.119238	0.0174583	0.000118421	8.51669	2.93543	2.14163	0	0.00946837	0.175021	0.27865	7.48412	7.98412	0.362245
0.90596	0.11499	0.0176073	0.000120881	8.58876	2.93572	2.14138	-3.66211	0.00967566	0.178697	0.28246	7.53523	8.03523	0.367198
0.90712	0.119238	0.0177522	0.000117072	8.66143	2.93601	2.14114	3.66211	0.0115369	1.60455	0.286317	7.58669	8.08669	0.372212
0.90828	0.119092	0.0178926	0.000109467	8.73345	2.9363	2.1409	-0.12628	0.0117538	0.186935	0.28958	7.64076	8.14076	0.376454
0.90944	0.119092	0.0180351	0.000105212	8.80513	2.9366	2.14066	0	0.0120328	0.240536	0.292889	7.69424	8.19424	0.380756
0.9106	0.119385	0.0181842	0.000107877	8.8772	2.93689	2.14042	0.252559	0.0123173	0.245209	0.296222	7.74797	8.24797	0.385089
0.91176	0.119092	0.0183354	0.000108392	8.95113	2.93717	2.14019	-0.252559	0.0124935	0.151917	0.299578	7.80345	8.30345	0.389452
0.91292	0.119092	0.0184853	0.000105382	9.02591	2.93746	2.13995	0	0.0127891	0.254844	0.303001	7.8594	8.3594	0.393901
0.91408	0.119238	0.0186307	9.58217e-05	9.10119	2.93775	2.13971	0.12628	0.0130905	0.25981	0.306445	7.91575	8.41575	0.398378
0.91524	0.119092	0.018772	8.16308e-05	9.17636	2.93804	2.13948	-0.12628	0.0133409	0.215856	0.30991	7.97185	8.47185	0.402883
0.9164	0.119824	0.018913	6.94017e-05	9.25061	2.93832	2.13924	0.631398	0.0136542	0.270075	0.313417	8.02681	8.52681	0.407443
0.91756	0.119238	0.0190597	6.38029e-05	9.32488	2.93861	2.13901	-0.505119	0.0136892	0.0301871	0.316944	8.08169	8.58169	0.412028
0.91872	0.119385	0.0192157	6.73062e-05	9.39995	2.93889	2.13877	0.12628	0.0139579	0.231655	0.320601	8.13665	8.63665	0.416781
0.91988	0.119238	0.0193699	6.7541e-05	9.47555	2.93917	2.13854	-0.12628	0.014176	0.188037	0.324297	8.19192	8.69192	0.421586
0.92104	0.119092	0.0195251	6.28578e-05	9.55361	2.93946	2.13831	-0.12628	0.0144574	0.24258	0.328055	8.24931	8.74931	0.426471
0.9222	0.119238	0.0196763	5.24296e-05	9.63206	2.93974	2.13808	0.12628	0.0148022	0.297232	0.331851	8.30689	8.80689	0.431406
0.92336	0.119092	0.0198224	4.20254e-05	9.70804	2.94002	2.13785	-0.12628	0.0150968	0.253942	0.335662	8.3619	8.8619	0.436361
0.92452	0.119238	0.0199729	3.68645e-05	9.78401	2.94029	2.13762	0.12628	0.015455	0.308842	0.339511	8.4167	8.9167	0.441364
0.92568	0.119385	0.0201311	4.02437e-05	9.86026	2.94057	2.13739	0.12628	0.0157634	0.265807	0.343373	8.47171	8.97171	0.446385
0.92684	0.119385	0.0202873	4.00673e-05	9.93696	2.94085	2.13716	0	0.0160219	0.22289	0.347271	8.52697	9.02697	0.451452
0.928	0.119238	0.0204426	3.68851e-05	10.0144	2.94113	2.13693	-0.12628	0.0162877	0.229112	0.351224	8.58271	9.08271	0.456591
0.92916	0.119238	0.0205932	2.73963e-05	10.0922	2.9414	2.13671	0	0.0166177	0.284474	0.355232	8.63846	9.13846	0.461802
0.93032	0.119385	0.020738	1.37962e-05	10.1689	2.94168	2.13648	0.12628	0.0169551	0.290928	0.359272	8.69291	9.19291	0.467054
0.93148	0.118506	0.0208841	4.05189e-06	10.2446	2.94195	2.13626	-0.757678	0.0172434	0.248473	0.363343	8.7462	9.2462	0.472347
0.93264	0.119238	0.0210367	2.28308e-06	10.3202	2.94222	2.13603	0.631398	0.0178807	0.549397	0.367466	8.79912	9.29912	0.477706
0.9338	0.119238	0.0212	1.04135e-05	10.3969	2.94249	2.13581	0	0.0182416	0.311151	0.371507	8.85365	9.35365	0.482959
0.93496	0.119238	0.0213619	1.57997e-05	10.4742	2.94276	2.13559	0	0.0186108	0.318235	0.375575	8.90852	9.40852	0.488247
0.93612	0.119092	0.021518	1.40451e-05	10.5515	2.94303	2.13536	-0.12628	0.0189883	0.325462	0.379669	8.96329	9.46329	0.493569
0.93728	0.119385	0.0216692	7.34832e-06	10.6284	2.9433	2.13514	0.252559	0.0194313	0.381873	0.383787	9.01762	9.51762	0.498923
0.93844	0.119385	0.0218189	3.12974e-06	10.7036	2.94357	2.13492	0	0.0197692	0.291344	0.387906	9.07011	9.57011	0.504278
0.9396	0.119385	0.0219738	6.06141e-06	10.7784	2.94384	2.1347	0	0.0201161	0.299021	0.392069	9.12201	9.62201	0.509689
0.94076	0.12041	0.0221379	1.88941e-05	10.8536	2.9441	2.13448	0.883957	0.020472	0.306832	0.396273	9.17411	9.67411	0.515155
0.94192	0.118506	0.0223008	2.87113e-05	10.9295	2.94437	2.13427	-1.64164	0.020439	-0.0284828	0.400518	9.22665	9.72665	0.520673
0.94308	0.119385	0.022456	3.02938e-05	11.005	2.94463	2.13405	0.757678	0.0211546	0.616947	0.404956	9.27775	9.77775	0.526443
0.94424	0.119385	0.0226067	2.61166e-05	11.0806	2.94489	2.13383	0	0.0215385	0.330934	0.409298	9.32949	9.82949	0.532088
0.9454	0.119238	0.0227541	2.38763e-05	11.1539	2.94516	2.13362	-0.12628	0.0219321	0.339298	0.413676	9.37868	9.87868	0.537779
0.94656	0.119385	0.0229062	2.76957e-05	11.2269	2.94542	2.1334	0.12628	0.0223925	0.396853	0.418088	9.42744	9.92744	0.543514
0.94772	0.119238	0.0230659	4.08761e-05	11.2999	2.94568	2.13319	-0.12628	0.022806	0.35651	0.422509	9.47608	9.97608	0.549261
0.94888	0.119531	0.0232238	5.10509e-05	11.3732	2.94594	2.13297	0.252559	0.0232867	0.414404	0.426959	9.52488	10.0249	0.555047
0.95004	0.119385	0.0233703	4.80521e-05	11.4463	2.94619	2.13276	-0.12628	0.0236642	0.325372	0.431415	9.57347	10.0735	0.56084
0.9512	0.119385	0.0235115	3.84769e-05	11.5195	2.94645	2.13255	0	0.0241091	0.383599	0.43592	9.62192	10.1219	0.566695
0.95236	0.119385	0.0236508	2.89194e-05	11.5917	2.94671	2.13234	0	0.024565	0.392961	0.440447	9.66928	10.1693	0.572581
0.95352	0.119531	0.0237914	2.45992e-05	11.6625	2.94696	2.13213	0.12628	0.0250319	0.4025	0.444996	9.71507	10.2151	0.578495
0.95468	0.119385	0.0239391	2.90886e-05	11.7332	2.94722	2.13192	-0.12628	0.0254532	0.363184	0.449564	9.76055	10.2605	0.584434
0.95584	0.119531	0.0240972	4.45891e-05	11.8043	2.94747	2.13171	0.12628	0.0259428	0.422105	0.454171	9.80637	10.3064	0.590423
0.957	0.119531	0.0242456	4.80128e-05	11.8757	2.94772	2.1315	0	0.0263872	0.383141	0.458793	9.85235	10.3523	0.596431
0.95816	0.119385	0.0243874	4.40353e-05	11.9469	2.94798	2.1313	-0.12628	0.0268436	0.393388	0.463449	9.89798	10.398	0.602483
0.95932	0.119531	0.0245269	3.84283e-05	12.0177	2.94823	2.13109	0.12628	0.0273689	0.452851	0.468136	9.94295	10.4429	0.608576
0.96048	0.119678	0.0246652	3.69633e-05	12.0861	2.94848	2.13088	0.12628	0.0278496	0.414441	0.47283	9.98559	10.4856	0.614679
0.96164	0.119531	0.0248093	4.34885e-05	12.1541	2.94873	2.13068	-0.12628	0.028286	0.376217	0.47755	10.0276	10.5276	0.620815
0.9628	0.119385	0.0249627	6.04814e-05	12.2224	2.94897	2.13047	-0.12628	0.0287921	0.43624	0.482316	10.0697	10.5697	0.627011
0.96396	0.119531	0.025114	7.42028e-05	12.291	2.94922	2.13027	0.12628	0.029368	0.496459	0.487103	10.1119	10.6119	0.633234
0.96512	0.119385	0.0252558	7.861e-05	12.3588	2.94947	2.13007	-0.12628	0.0299002	0.458825	0.491885	10.1534	10.6534	0.639451
0.96628	0.119531	0.0253927	7.81043e-05	12.4261	2.94971	2.12987	0.12628	0.0305028	0.519473	0.496683	10.1943	10.6943	0.645688
0.96744	0.119238	0.0255273	7.95587e-05	12.4916	2.94995	2.12967	-0.252559	0.0310622	0.482281	0.50147	10.2335	10.7335	0.651911
0.9686	0.118652	0.0256662	8.79229e-05	12.5563	2.9502	2.12947	-0.505119	0.0317494	0.592419	0.506266	10.2718	10.7718	0.658145
0.96976	0.125391	0.0258132	0.0001065	12.6207	2.95044	2.12927	5.80886	0.0326785	0.800899	0.511023	10.3101	10.8101	0.66433
0.97092	0.119531	0.0259604	0.000123476	12.6859	2.95068	2.12907	-5.05119	0.0310056	-1.44215	0.515649	10.3499	10.8499	0.670344
0.97208	0.119531	0.0260952	0.00012676	12.7507	2.95092	2.12887	0	0.031622	0.531403	0.521157	10.3844	10.8844	0.677505
0.97324	0.119824	0.0262238	0.000123229	12.8153	2.95116	2.12867	0.252559	0.0322527	0.543683	0.526661	10.4186	10.9186	0.68466
0.9744	0.12041	0.0263516	0.000120304	12.8792	2.9514	2.12848	0.505119	0.0327841	0.458131	0.532157	10.4523	10.9523	0.691804
0.97556	0.119971	0.0264813	0.000123482	12.9415	2.95164	2.12828	-0.378839	0.0331028	0.274711	0.537687	10.4842	10.9842	0.698993
0.97672	0.119531	0.0266186	0.000136614	13.0035	2.95187	2.12809	-0.378839	0.033607	0.434679	0.543334	10.5151	11.0151	0.706335
0.97788	0.119385	0.0267669	0.000152008	13.0699	2.95211	2.12789	-0.12628	0.034297	0.594843	0.549031	10.5502	11.0502	0.713741
0.97904	0.119385	0.0269032	0.000153723	13.1361	2.95234	2.1277	0	0.0350594	0.657199	0.554707	10.5852	11.0852	0.72112
0.9802	0.119385	0.0270323	0.00014836	13.2016	2.95258	2.12751	0	0.0358375	0.670815	0.560337	10.6197	11.1197	0.728439
0.98136	0.119678	0.027161	0.000143338	13.2668	2.95281	2.12732	0.252559	0.0366318	0.68473	0.565918	10.6542	11.1542	0.735693
0.98252	0.119678	0.0272908	0.000143606	13.3304	2.95304	2.12713	-8.37453e-14	0.0373288	0.60088	0.571444	10.6874	11.1874	0.742878
0.98368	0.118799	0.027428	0.000153012	13.3938	2.95327	2.12694	-0.757678	0.0380427	0.615376	0.576958	10.7206	11.2206	0.750045
0.98484	0.119531	0.0275758	0.00017266	13.4583	2.9535	2.12675	0.631398	0.039115	0.924376	0.582454	10.7548	11.2548	0.75719
0.986	0.119531	0.0277112	0.000179189	13.522	2.95373	2.12656	0	0.0399204	0.694377	0.587796	10.7891	11.2891	0.764135
0.98716	0.119824	0.0278379	0.000177276	13.585	2.95396	2.12637	0.252559	0.0407439	0.709878	0.59309	10.823	11.323	0.771017
0.98832	0.119971	0.0279636	0.000174069	13.6479	2.95418	2.12619	0.12628	0.0414719	0.627625	0.598332	10.8571	11.3571	0.777831
0.98948	0.120264	0.0280889	0.00017479	13.7091	2.95441	2.126	0.252559	0.0421618	0.594691	0.60356	10.8895	11.3895	0.784628
0.99064	0.119531	0.0282192	0.000183838	13.7693	2.95463	2.12582	-0.631398	0.0427568	0.512988	0.608792	10.9209	11.4209	0.79143
0.9918	0.119678	0.0283584	0.000203966	13.8293	2.95486	2.12563	0.12628	0.0436556	0.774782	0.614068	10.952	11.452	0.798288
0.99296	0.119678	0.0284859	0.00021154	13.8887	2.95508	2.12545	0	0.0445171	0.742696	0.619271	10.9827	11.4827	0.805052
0.99412	0.119824	0.0286007	0.000205738	13.9475	2.9553	2.12527	0.12628	0.0453987	0.759984	0.624418	11.0132	11.5132	0.811744
0.99528	0.119824	0.0287134	0.000197555	14.0061	2.95552	2.12508	0	0.0462438	0.728575	0.629505	11.0439	11.5439	0.818356
0.99644	0.119824	0.0288271	0.000191385	14.0645	2.95574	2.1249	0	0.0471098	0.746533	0.634546	11.0744	11.5744	0.82491
0.9976	0.119678	0.0289448	0.000192175	14.1219	2.95596	2.12472	-0.12628	0.047997	0.764827	0.639538	11.1044	11.6044	0.831399
0.99876	0.119971	0.0290713	0.000203226	14.1794	2.95618	2.12454	0.252559	0.0489627	0.832503	0.644472	11.1348	11.6348	0.837814
0.99992	0.119971	0.0291997	0.000215468	14.2373	2.9564	2.12436	0	0.0498367	0.753441	0.649323	11.1661	11.6661	0.844119
1.00108	0.120117	0.0293156	0.00021461	14.2945	2.95661	2.12419	0.12628	0.0507332	0.772794	0.654126	11.1969	11.6969	0.850364
1.00224	0.119971	0.0294275	0.000210001	14.3513	2.95683	2.12401	-0.12628	0.0515956	0.743457	0.658876	11.2275	11.7275	0.856538
1.0034	0.119971	0.0295401	0.000206311	14.4081	2.95704	2.12383	0	0.0525381	0.812531	0.663587	11.2584	11.7584	0.862664
1.00456	0.119971	0.0296548	0.000208488	14.4635	2.95726	2.12366	0	0.0535043	0.832934	0.668232	11.2882	11.7882	0.868702
1.00572	0.120557	0.0297776	0.000220108	14.5189	2.95747	2.12348	0.505119	0.0544946	0.85371	0.672803	11.3185	11.8185	0.874643
1.00688	0.119971	0.0299103	0.000237051	14.5771	2.95768	2.12331	-0.505119	0.0552819	0.678721	0.677291	11.352	11.852	0.880479
1.00804	0.120117	0.0300302	0.000241179	14.6342	2.95789	2.12314	0.12628	0.0563217	0.89634	0.68178	11.3844	11.8844	0.886314
1.0092	0.119971	0.0301391	0.000237168	14.6893	2.9581	2.12296	-0.12628	0.0573299	0.869172	0.686171	11.4153	11.9153	0.892023
1.01036	0.118066	0.0302478	0.000232715	14.7445	2.95831	2.12279	-1.64164	0.0584209	0.940473	0.690481	11.4468	11.9468	0.897625
1.01152	0.119971	0.0303591	0.00023304	14.7989	2.95852	2.12262	1.64164	0.0602776	1.60065	0.694677	11.4782	11.9782	0.90308
1.01268	0.120264	0.0304776	0.000241994	14.8534	2.95872	2.12245	0.252559	0.061422	0.986568	0.698466	11.5118	12.0118	0.908005
1.01384	0.120117	0.030606	0.000262331	14.908	2.95893	2.12228	-0.12628	0.0624804	0.912343	0.702124	11.5463	12.0463	0.912762
1.015	0.12041	0.0307228	0.000269863	14.9622	2.95913	2.12211	0.252559	0.0636237	0.985645	0.705688	11.5809	12.0809	0.917395
1.01616	0.120557	0.0308272	0.000264046	15.0158	2.95933	2.12195	0.12628	0.064682	0.912275	0.709126	11.6156	12.1156	0.921864
1.01732	0.120264	0.0309308	0.000256973	15.0695	2.95954	2.12178	-0.252559	0.0657124	0.888355	0.712473	11.6509	12.1509	0.926215
1.01848	0.120264	0.0310365	0.000253316	15.1229	2.95974	2.12161	0	0.0668863	1.01195	0.71574	11.6864	12.1864	0.930462
1.01964	0.120557	0.0311471	0.000257472	15.1755	2.95994	2.12145	0.252559	0.0680903	1.03792	0.718874	11.7217	12.2217	0.934536
1.0208	0.120703	0.0312666	0.000272466	15.2279	2.96014	2.12128	0.12628	0.0692112	0.966289	0.721864	11.7576	12.2576	0.938423
1.02196	0.120557	0.0313862	0.000287859	15.2803	2.96034	2.12112	-0.12628	0.0703064	0.944127	0.724744	11.7942	12.2942	0.942167
1.02312	0.120703	0.0314935	0.000290185	15.3319	2.96054	2.12096	0.12628	0.0714901	1.02047	0.727525	11.8305	12.3305	0.945782
1.02428	0.121143	0.0315983	0.000289892	15.3835	2.96073	2.1208	0.378839	0.0726492	0.999191	0.730174	11.8675	12.3675	0.949226
1.02544	0.121289	0.0316899	0.000276534	15.4339	2.96093	2.12064	0.12628	0.0736703	0.880289	0.732702	11.9041	12.4041	0.952512
1.0266	0.120996	0.0317836	0.000265225	15.4846	2.96112	2.12048	-0.252559	0.0746678	0.859859	0.735163	11.9412	12.4412	0.955712
1.02776	0.121289	0.0318846	0.000263384	15.5349	2.96132	2.12032	0.252559	0.0758126	0.98693	0.737569	11.9782	12.4782	0.958839
1.02892	0.121436	0.0319855	0.000260287	15.5856	2.96151	2.12016	0.12628	0.0768778	0.918295	0.739862	12.0164	12.5164	0.96182
1.03008	0.121582	0.0320773	0.000247686	15.6359	2.9617	2.12	0.12628	0.0779208	0.89911	0.742074	12.0545	12.5545	0.964697
1.03124	0.117041	0.0321699	0.000235471	15.6863	2.96189	2.11984	-3.91467	0.078942	0.880332	0.744216	12.0931	12.5931	0.967481
1.0324	0.122021	0.0322656	0.000228036	15.7363	2.96208	2.11969	4.29351	0.0817621	2.43116	0.746297	12.1317	12.6317	0.970186
1.03356	0.121875	0.0323666	0.000229778	15.7852	2.96227	2.11953	-0.12628	0.082685	0.795624	0.747618	12.1733	12.6733	0.971904
1.03472	0.122021	0.0324666	0.000232174	15.8333	2.96246	2.11938	0.12628	0.0837021	0.876771	0.748918	12.2142	12.7142	0.973594
1.03588	0.121875	0.0325665	0.000234949	15.8811	2.96264	2.11922	-0.12628	0.0847	0.860236	0.750161	12.2553	12.7553	0.975209
1.03704	0.122021	0.0326573	0.000228483	15.9284	2.96283	2.11907	0.12628	0.0857929	0.942166	0.751353	12.2959	12.7959	0.976759
1.0382	0.121729	0.032747	0.00022102	15.9754	2.96302	2.11892	-0.252559	0.0868676	0.926443	0.75246	12.3369	12.8369	0.978198
1.03936	0.122168	0.0328403	0.000216957	16.0229	2.9632	2.11877	0.378839	0.0880951	1.05825	0.753489	12.3787	12.8787	0.979535
1.04052	0.122461	0.0329373	0.00022069	16.0689	2.96338	2.11862	0.252559	0.0891917	0.945348	0.75438	12.4198	12.9198	0.980694
1.04168	0.12334	0.0330354	0.000225348	16.1152	2.96356	2.11847	0.757678	0.0902147	0.881909	0.755185	12.4616	12.9616	0.981741
1.04284	0.122314	0.0331324	0.000230658	16.1605	2.96374	2.11832	-0.883957	0.0909371	0.622715	0.755933	12.5029	13.0029	0.982713
1.044	0.121289	0.0332182	0.000226174	16.2045	2.96392	2.11817	-0.883957	0.0920986	1.00129	0.756741	12.5424	13.0424	0.983764
1.04516	0.122754	0.0333002	0.000217394	16.2484	2.9641	2.11802	1.2628	0.0936998	1.38032	0.757439	12.5824	13.0824	0.984671
1.04632	0.121729	0.0333861	0.000213386	16.2921	2.96428	2.11788	-0.883958	0.0947743	0.92633	0.757856	12.6239	13.1239	0.985213
1.04748	0.122754	0.0334777	0.000218547	16.335	2.96446	2.11773	0.883957	0.0962897	1.3064	0.758198	12.6649	13.1649	0.985657
1.04864	0.12334	0.0335601	0.00021446	16.3771	2.96463	2.11758	0.505119	0.0974503	1.00052	0.758292	12.7065	13.2065	0.98578
1.0498	0.120264	0.0336459	0.000216793	16.4182	2.96481	2.11744	-2.65187	0.0984273	0.842216	0.758278	12.7477	13.2477	0.985761
1.05096	0.123047	0.0337383	0.000228847	16.4585	2.96498	2.1173	2.39931	0.100643	1.91023	0.758225	12.7883	13.2883	0.985693
1.05212	0.123633	0.0338283	0.000241004	16.4977	2.96516	2.11715	0.505119	0.101824	1.0176	0.757654	12.8306	13.3306	0.98495
1.05328	0.123633	0.033918	0.000249421	16.5383	2.96533	2.11701	0	0.102822	0.860986	0.756966	12.8749	13.3749	0.984055
1.05444	0.123926	0.0340006	0.000249978	16.5785	2.9655	2.11687	0.252559	0.103867	0.900915	0.75623	12.9193	13.4193	0.983099
1.0556	0.124072	0.0340846	0.000251748	16.619	2.96567	2.11673	0.12628	0.104845	0.843173	0.75543	12.9642	13.4642	0.982059
1.05676	0.124219	0.0341725	0.000258856	16.6592	2.96584	2.11659	0.12628	0.105814	0.83485	0.75459	13.009	13.509	0.980967
1.05792	0.123486	0.0342652	0.000275153	16.698	2.96601	2.11645	-0.631398	0.106773	0.826903	0.753714	13.0526	13.5526	0.979828
1.05908	0.124219	0.0343559	0.00029075	16.7361	2.96617	2.11632	0.631398	0.108065	1.11356	0.752805	13.0957	13.5957	0.978646
1.06024	0.124512	0.0344463	0.000306753	16.7738	2.96634	2.11618	0.252559	0.109121	0.91033	0.751733	13.1393	13.6393	0.977253
1.0614	0.124658	0.0345297	0.000315472	16.8112	2.96651	2.11604	0.12628	0.110112	0.854629	0.75059	13.1829	13.6829	0.975767
1.06256	0.124658	0.0346165	0.000326808	16.8491	2.96667	2.11591	0	0.111096	0.848351	0.7494	13.2274	13.7274	0.97422
1.06372	0.123779	0.0347066	0.000345164	16.8857	2.96683	2.11578	-0.757678	0.11213	0.891492	0.748165	13.2708	13.7708	0.972615
1.06488	0.125098	0.0347926	0.000362302	16.9209	2.967	2.11564	1.13652	0.113556	1.22926	0.746866	13.3131	13.8131	0.970926
1.06604	0.124805	0.0348766	0.000379879	16.9548	2.96716	2.11551	-0.252559	0.114521	0.83202	0.74535	13.3554	13.8554	0.968955
1.0672	0.125244	0.034955	0.000389929	16.9891	2.96732	2.11538	0.378839	0.115652	0.974566	0.743795	13.3983	13.8983	0.966933
1.06836	0.125684	0.0350267	0.000393006	17.023	2.96748	2.11525	0.378839	0.116664	0.872365	0.742135	13.4413	13.9413	0.964776
1.06952	0.125391	0.0351005	0.000398186	17.0571	2.96763	2.11512	-0.252559	0.117558	0.770554	0.740417	13.4849	13.9849	0.962542
1.07068	0.12627	0.0351793	0.000409044	17.0913	2.96779	2.11499	0.757678	0.118618	0.914281	0.738686	13.5286	14.0286	0.960291
1.07184	0.126123	0.0352516	0.000412389	17.1254	2.96795	2.11486	-0.12628	0.119391	0.666117	0.736875	13.5726	14.0726	0.957937
1.073	0.125537	0.0353183	0.000409596	17.1593	2.9681	2.11473	-0.505119	0.120274	0.761517	0.735096	13.6163	14.1163	0.955625
1.07416	0.128467	0.0353891	0.000409462	17.1941	2.96826	2.1146	2.52559	0.121439	1.00437	0.733305	13.6609	14.1609	0.953297
1.07532	0.125977	0.0354635	0.000416112	17.2278	2.96841	2.11448	-2.14675	0.121522	0.0707767	0.731392	13.7052	14.2052	0.95081
1.07648	0.128174	0.0355334	0.000421026	17.2601	2.96856	2.11435	1.89419	0.122625	0.951609	0.729777	13.7463	14.2463	0.94871
1.07764	0.126562	0.0356007	0.000425854	17.2911	2.96871	2.11423	-1.38908	0.122931	0.263661	0.728062	13.7868	14.2868	0.946481
1.0788	0.127295	0.0356732	0.000436099	17.3225	2.96886	2.1141	0.631398	0.123918	0.850815	0.726556	13.8264	14.3264	0.944523
1.07996	0.126562	0.0357396	0.000439666	17.3536	2.96901	2.11398	-0.631398	0.124677	0.653746	0.724994	13.8661	14.3661	0.942492
1.08112	0.127295	0.035808	0.000444808	17.385	2.96916	2.11386	0.631398	0.125776	0.947351	0.723464	13.906	14.406	0.940503
1.08228	0.127441	0.0358816	0.000455648	17.4167	2.96931	2.11374	0.12628	0.126647	0.751004	0.721833	13.9466	14.4466	0.938383
1.08344	0.127734	0.0359484	0.00046422	17.4459	2.96946	2.11362	0.252559	0.127518	0.751146	0.72019	13.9849	14.4849	0.936246
1.0846	0.125391	0.0360128	0.000472452	17.4741	2.9696	2.1135	-2.02047	0.128333	0.70259	0.718532	14.0222	14.5222	0.934091
1.08576	0.128174	0.0360809	0.000483646	17.5029	2.96974	2.11338	2.39931	0.130116	1.53703	0.716881	14.0601	14.5601	0.931945
1.08692	0.129053	0.0361434	0.00048846	17.5316	2.96989	2.11326	0.757678	0.130877	0.655839	0.714861	14.0999	14.5999	0.929319
1.08808	0.128174	0.0362058	0.000492945	17.5604	2.97003	2.11314	-0.757678	0.131355	0.412434	0.712868	14.1396	14.6396	0.926728
1.08924	0.127881	0.0362737	0.000501501	17.5901	2.97017	2.11303	-0.252559	0.132234	0.757671	0.711009	14.1796	14.6796	0.924312
1.0904	0.128906	0.036336	0.00050726	17.6183	2.97031	2.11291	0.883957	0.133286	0.907096	0.70913	14.2181	14.7181	0.921869
1.09156	0.127734	0.036395	0.000512147	17.6453	2.97045	2.1128	-1.01024	0.134	0.61559	0.707162	14.2559	14.7559	0.91931
1.09272	0.128906	0.0364554	0.000521115	17.6712	2.97059	2.11268	1.01024	0.13523	1.05993	0.705235	14.2924	14.7924	0.916805
1.09388	0.129053	0.0365112	0.000523445	17.6977	2.97073	2.11257	0.12628	0.136065	0.720139	0.703148	14.3303	14.8303	0.914092
1.09504	0.130078	0.0365629	0.000520237	17.7244	2.97086	2.11246	0.883957	0.136905	0.72394	0.701053	14.3686	14.8686	0.911369
1.0962	0.12876	0.0366186	0.000520838	17.7514	2.971	2.11235	-1.13652	0.137408	0.433839	0.698949	14.4072	14.9072	0.908633
1.09736	0.129053	0.03668	0.000520849	17.7815	2.97113	2.11224	0.252559	0.138485	0.928539	0.696963	14.4482	14.9482	0.906052
1.09852	0.130664	0.0367356	0.000518621	17.8098	2.97127	2.11213	1.38908	0.139511	0.884241	0.694873	14.488	14.988	0.903335
1.09968	0.129932	0.036789	0.000518551	17.836	2.9714	2.11202	-0.631398	0.139974	0.399	0.692698	14.5261	15.0261	0.900508
1.10084	0.130078	0.0368481	0.000524764	17.8624	2.97153	2.11191	0.12628	0.140784	0.698545	0.690656	14.5638	15.0638	0.897852
1.102	0.130078	0.0369028	0.000525166	17.8891	2.97166	2.1118	0	0.141601	0.704178	0.688609	14.6017	15.1017	0.895192
1.10316	0.129492	0.0369602	0.000528004	17.916	2.97179	2.1117	-0.505119	0.142482	0.759166	0.686556	14.64	15.14	0.892523
1.10432	0.128027	0.0370233	0.000536578	17.9435	2.97192	2.11159	-1.2628	0.143654	1.01065	0.68447	14.6789	15.1789	0.889811
1.10548	0.130811	0.0370788	0.000542646	17.9682	2.97204	2.11149	2.39931	0.14546	1.55681	0.682237	14.7159	15.2159	0.886908
1.10664	0.131396	0.0371319	0.000548134	17.992	2.97217	2.11138	0.505119	0.146251	0.681577	0.67961	14.7541	15.2541	0.883493
1.1078	0.130811	0.0371894	0.000559643	18.0155	2.9723	2.11128	-0.505119	0.14688	0.542218	0.676982	14.7921	15.2921	0.880077
1.10896	0.13125	0.0372421	0.00056508	18.0391	2.97242	2.11118	0.378839	0.147802	0.795407	0.674415	14.8298	15.3298	0.87674
1.11012	0.131543	0.0372944	0.000569948	18.0627	2.97254	2.11107	0.252559	0.148621	0.70569	0.671794	14.8679	15.3679	0.873332
1.11128	0.132129	0.0373526	0.000579198	18.0875	2.97267	2.11097	0.505119	0.149393	0.665327	0.669157	14.9071	15.4071	0.869904
1.11244	0.132275	0.037403	0.000585134	18.1098	2.97279	2.11087	0.12628	0.150004	0.527189	0.666522	14.9439	15.4439	0.866478
1.1136	0.133008	0.0374498	0.00058996	18.1307	2.97291	2.11078	0.631398	0.150626	0.536402	0.663949	14.979	15.479	0.863134
1.11476	0.131396	0.0374998	0.0006	18.1511	2.97303	2.11068	-1.38908	0.151032	0.349705	0.661435	15.0132	15.5132	0.859865
1.11592	0.132861	0.037547	0.000603988	18.1727	2.97315	2.11058	1.2628	0.152131	0.947771	0.65906	15.0478	15.5478	0.856778
1.11708	0.133154	0.0375912	0.000604399	18.1942	2.97326	2.11048	0.252559	0.152731	0.51647	0.656556	15.0831	15.5831	0.853522
1.11824	0.132715	0.0376401	0.000609207	18.2162	2.97338	2.11039	-0.378839	0.153285	0.477703	0.654114	15.1186	15.6186	0.850348
1.1194	0.132568	0.0376827	0.000610166	18.2367	2.97349	2.11029	-0.12628	0.154079	0.684341	0.651752	15.1521	15.6521	0.847278
1.12056	0.132422	0.0377215	0.000609476	18.256	2.97361	2.1102	-0.12628	0.154999	0.793212	0.649376	15.1845	15.6845	0.844188
1.12172	0.133008	0.0377637	0.000613459	18.2751	2.97372	2.11011	0.505119	0.156045	0.90244	0.646934	15.2169	15.7169	0.841014
1.12288	0.131543	0.0378035	0.000612496	18.295	2.97383	2.11001	-1.2628	0.156935	0.766885	0.644378	15.2509	15.7509	0.837691
1.12404	0.134326	0.0378412	0.000607684	18.3155	2.97395	2.10992	2.39931	0.158464	1.31821	0.641766	15.2858	15.7858	0.834296
1.1252	0.133887	0.0378843	0.000606722	18.337	2.97406	2.10983	-0.378839	0.158984	0.448023	0.638849	15.3233	15.8233	0.830504
1.12636	0.133447	0.0379214	0.000601358	18.3574	2.97416	2.10974	-0.378839	0.159746	0.656875	0.636019	15.3593	15.8593	0.826825
1.12752	0.136816	0.0379521	0.000594342	18.3754	2.97427	2.10965	2.90443	0.16075	0.866022	0.633179	15.3929	15.8929	0.823133
1.12868	0.134033	0.037986	0.000592268	18.3929	2.97438	2.10956	-2.39931	0.160519	-0.199425	0.630234	15.4266	15.9266	0.819305
1.12984	0.133154	0.0380284	0.000597884	18.4113	2.97449	2.10948	-0.757678	0.161441	0.794628	0.627663	15.4592	15.9592	0.815962
1.131	0.134766	0.0380685	0.000599096	18.4305	2.97459	2.10939	1.38908	0.162777	1.15155	0.625017	15.4929	15.9929	0.812522
1.13216	0.135205	0.0381121	0.000603603	18.4501	2.9747	2.1093	0.378839	0.16356	0.675341	0.622134	15.5283	16.0283	0.808774
1.13332	0.13374	0.038151	0.000603433	18.4692	2.9748	2.10922	-1.2628	0.164247	0.591743	0.619226	15.5635	16.0635	0.804994
1.13448	0.137109	0.0381833	0.000601062	18.486	2.9749	2.10913	2.90443	0.165576	1.1459	0.616331	15.5962	16.0962	0.801231
1.13564	0.135937	0.0382183	0.00060336	18.5023	2.975	2.10905	-1.01024	0.165671	0.0823293	0.613198	15.6297	16.1297	0.797157
1.1368	0.135645	0.0382603	0.000613079	18.5189	2.9751	2.10897	-0.252559	0.166296	0.538968	0.610303	15.6622	16.1622	0.793394
1.13796	0.135352	0.0382992	0.0006184	18.5358	2.9752	2.10889	-0.252559	0.16711	0.70162	0.607441	15.6949	16.1949	0.789673
1.13912	0.136377	0.0383407	0.000624826	18.5535	2.9753	2.10881	0.883957	0.168113	0.864591	0.604536	15.7285	16.2285	0.785897
1.14028	0.135937	0.0383782	0.000625759	18.5715	2.9754	2.10873	-0.378839	0.168794	0.586608	0.601515	15.7631	16.2631	0.781969
1.14144	0.136816	0.0384074	0.000623126	18.5869	2.97549	2.10865	0.757678	0.169721	0.799268	0.598499	15.7952	16.2952	0.778049
1.1426	0.136523	0.0384377	0.000624073	18.6014	2.97559	2.10857	-0.252559	0.170383	0.570949	0.595394	15.8267	16.3267	0.774012
1.14376	0.136963	0.0384729	0.0006319	18.6154	2.97568	2.10849	0.378839	0.171236	0.735189	0.592299	15.8578	16.3578	0.769989
1.14492	0.137256	0.0385053	0.000635064	18.63	2.97578	2.10842	0.252559	0.171995	0.654571	0.58914	15.8898	16.3898	0.765882
1.14608	0.137402	0.0385362	0.000634664	18.6453	2.97587	2.10834	0.12628	0.172718	0.623286	0.585952	15.9226	16.4226	0.761738
1.14724	0.137695	0.0385634	0.000627128	18.6618	2.97596	2.10826	0.252559	0.173462	0.641319	0.582747	15.9567	16.4567	0.757571
1.1484	0.137109	0.038585	0.000615751	18.6771	2.97605	2.10819	-0.505119	0.174171	0.610604	0.579515	15.9898	16.4898	0.75337
1.14956	0.138867	0.0386043	0.000606301	18.6905	2.97614	2.10812	1.51536	0.175185	0.87439	0.57627	16.021	16.521	0.74915
1.15072	0.138428	0.0386277	0.000602898	18.7033	2.97623	2.10804	-0.378839	0.175595	0.353966	0.57289	16.0524	16.5524	0.744757
1.15188	0.138574	0.0386606	0.000608566	18.7171	2.97631	2.10797	0.12628	0.176256	0.569267	0.569608	16.0843	16.5843	0.740491
1.15304	0.138867	0.0386921	0.000610658	18.7317	2.9764	2.1079	0.252559	0.176939	0.588675	0.566327	16.1169	16.6169	0.736225
1.1542	0.138867	0.0387186	0.000606153	18.7466	2.97648	2.10783	2.39272e-13	0.177587	0.559309	0.563036	16.1499	16.6499	0.731947
1.15536	0.140332	0.0387398	0.000596973	18.7608	2.97657	2.10776	1.2628	0.178316	0.628271	0.559747	16.1822	16.6822	0.727671
1.15652	0.139307	0.0387572	0.000590811	18.7718	2.97665	2.1077	-0.883957	0.178557	0.207138	0.556426	16.2115	16.7115	0.723354
1.15768	0.138428	0.0387784	0.000590964	18.7822	2.97673	2.10763	-0.757678	0.179275	0.619741	0.553263	16.2392	16.7392	0.719242
1.15884	0.140039	0.0388078	0.000599633	18.793	2.97681	2.10756	1.38908	0.180416	0.983585	0.55007	16.2677	16.7677	0.715091
1.16	0.140186	0.0388357	0.000604722	18.8046	2.97689	2.1075	0.12628	0.181013	0.51423	0.546682	16.2978	16.7978	0.710686
1.16116	0.140332	0.0388616	0.000603761	18.8177	2.97697	2.10743	0.12628	0.181634	0.535484	0.543308	16.3295	16.8295	0.706301
1.16232	0.140771	0.0388831	0.000597299	18.8309	2.97705	2.10737	0.378839	0.18228	0.55698	0.539938	16.3613	16.8613	0.70192
1.16348	0.14165	0.0388981	0.000590831	18.841	2.97713	2.1073	0.757678	0.182838	0.480651	0.53656	16.3899	16.8899	0.697528
1.16464	0.141797	0.0389164	0.000589579	18.8505	2.9772	2.10724	0.12628	0.183136	0.257425	0.533208	16.4178	16.9178	0.69317
1.1658	0.140332	0.0389409	0.000596565	18.8596	2.97728	2.10718	-1.2628	0.183461	0.279503	0.529979	16.4447	16.9447	0.688973
1.16696	0.140771	0.0389632	0.000598598	18.8697	2.97735	2.10712	0.378839	0.184436	0.841125	0.526864	16.4719	16.9719	0.684923
1.16812	0.141797	0.0389848	0.000597326	18.8808	2.97742	2.10706	0.883957	0.185324	0.765633	0.523607	16.501	17.001	0.680689
1.16928	0.14209	0.0390018	0.000589725	18.8923	2.9775	2.107	0.252559	0.185898	0.494334	0.52024	16.531	17.031	0.676313
1.17044	0.142383	0.0390114	0.000578266	18.9017	2.97757	2.10694	0.252559	0.186441	0.468448	0.516886	16.5589	17.0589	0.671952
1.1716	0.142236	0.0390212	0.000570917	18.9096	2.97764	2.10688	-0.12628	0.186955	0.442772	0.513553	16.585	17.085	0.667619
1.17276	0.142383	0.0390366	0.000571524	18.9168	2.97771	2.10683	0.12628	0.18761	0.56441	0.510253	16.6105	17.1105	0.663328
1.17392	0.143262	0.0390622	0.000582287	18.925	2.97777	2.10677	0.757678	0.188292	0.588227	0.506927	16.6369	17.1369	0.659006
1.17508	0.140625	0.0390864	0.000589738	18.9338	2.97784	2.10672	-2.27303	0.188718	0.367118	0.503566	16.6642	17.1642	0.654635
1.17624	0.147217	0.0391051	0.000590032	18.9429	2.97791	2.10666	5.68258	0.190253	1.32308	0.500265	16.6914	17.1914	0.650345
1.1774	0.142969	0.0391194	0.000585369	18.9518	2.97797	2.10661	-3.66211	0.189313	-0.809739	0.496594	16.7205	17.2205	0.645573
1.17856	0.142383	0.0391296	0.000584818	18.957	2.97803	2.10656	-0.505119	0.190109	0.685873	0.493512	16.7427	17.2427	0.641565
1.17972	0.143848	0.0391447	0.00059113	18.9618	2.9781	2.1065	1.2628	0.191218	0.95585	0.490343	16.765	17.265	0.637445
1.18088	0.144287	0.0391685	0.000607332	18.9668	2.97816	2.10645	0.378839	0.191844	0.539726	0.486964	16.7885	17.2885	0.633053
1.18204	0.144434	0.0391911	0.000620508	18.9725	2.97822	2.1064	0.12628	0.192386	0.467111	0.483561	16.8129	17.3129	0.62863
1.1832	0.14458	0.0392053	0.000624342	18.9779	2.97828	2.10635	0.12628	0.192957	0.492782	0.480166	16.837	17.337	0.624216
1.18436	0.143848	0.0392154	0.000622408	18.9836	2.97834	2.10631	-0.631398	0.193559	0.518674	0.476765	16.8614	17.3614	0.619795
1.18552	0.145166	0.0392215	0.000621855	18.9868	2.9784	2.10626	1.13652	0.194532	0.839028	0.473345	16.8834	17.3834	0.615349
1.18668	0.145605	0.0392311	0.000627357	18.9893	2.97845	2.10621	0.378839	0.195081	0.473229	0.469761	16.9056	17.4056	0.610689
1.18784	0.143848	0.039248	0.000642214	18.9915	2.97851	2.10617	-1.51536	0.195547	0.401871	0.466175	16.9275	17.4275	0.606027
1.189	0.145898	0.0392638	0.000652962	18.9948	2.97856	2.10612	1.76791	0.196784	1.06626	0.462618	16.9504	17.4504	0.601403
1.19016	0.146191	0.0392683	0.000650533	18.998	2.97862	2.10608	0.252559	0.197313	0.456148	0.458789	16.9746	17.4746	0.596425
1.19132	0.146338	0.0392677	0.000641524	19.0014	2.97867	2.10603	0.12628	0.197817	0.434695	0.454961	16.9991	17.4991	0.591449
1.19248	0.145313	0.0392632	0.000632804	19.0028	2.97872	2.10599	-0.883957	0.198354	0.462475	0.451142	17.0215	17.5215	0.586485
1.19364	0.146924	0.0392595	0.000628768	19.0027	2.97877	2.10595	1.38908	0.199378	0.882766	0.447318	17.0424	17.5424	0.581514
1.1948	0.148096	0.0392616	0.000633265	19.0018	2.97882	2.10591	1.01024	0.199866	0.420774	0.443298	17.0637	17.5637	0.576288
1.19596	0.148535	0.039274	0.000649869	19.001	2.97887	2.10587	0.378839	0.199989	0.106084	0.439288	17.085	17.585	0.571075
1.19712	0.148242	0.0392753	0.00065357	19.0002	2.97892	2.10583	-0.252559	0.200032	0.0366328	0.435429	17.1053	17.6053	0.566057
1.19828	0.147656	0.0392708	0.000650417	18.9993	2.97896	2.10579	-0.505119	0.200278	0.212386	0.431749	17.1247	17.6247	0.561273
1.19944	0.148242	0.0392638	0.000646458	18.9975	2.97901	2.10575	0.505119	0.200842	0.48631	0.428167	17.1426	17.6426	0.556618
1.2006	0.148389	0.0392546	0.000646364	18.993	2.97905	2.10572	0.12628	0.201269	0.368152	0.42456	17.1579	17.6579	0.551928
1.20176	0.147949	0.039251	0.000654536	18.9879	2.9791	2.10568	-0.378839	0.20173	0.397272	0.420978	17.1725	17.6725	0.547271
1.20292	0.148828	0.0392578	0.000673175	18.9835	2.97914	2.10565	0.757678	0.202452	0.622722	0.417407	17.1878	17.6878	0.542629
1.20408	0.148975	0.0392561	0.000679746	18.98	2.97918	2.10561	0.12628	0.202925	0.407114	0.413743	17.2044	17.7044	0.537865
1.20524	0.149268	0.0392468	0.0006781	18.9761	2.97922	2.10558	0.252559	0.203431	0.436878	0.410082	17.2206	17.7206	0.533106
1.2064	0.149414	0.039235	0.000673736	18.9721	2.97926	2.10555	0.12628	0.203916	0.417799	0.406409	17.2369	17.7369	0.528332
1.20756	0.149268	0.0392193	0.000671601	18.9653	2.9793	2.10552	-0.12628	0.204436	0.447947	0.402731	17.2503	17.7503	0.52355
1.20872	0.150146	0.0392079	0.000676092	18.9578	2.97934	2.10549	0.757678	0.205104	0.576374	0.399032	17.2632	17.7632	0.518742
1.20988	0.151025	0.0392047	0.000691061	18.9501	2.97937	2.10546	0.757678	0.205524	0.361794	0.395254	17.2762	17.7762	0.51383
1.21104	0.150586	0.0392	0.000703317	18.9428	2.97941	2.10543	-0.378839	0.205695	0.147378	0.391491	17.2896	17.7896	0.508938
1.2122	0.151025	0.0391834	0.000702418	18.935	2.97944	2.1054	0.378839	0.206129	0.374368	0.387838	17.3019	17.8019	0.504189
1.21336	0.151025	0.0391615	0.000695238	18.9272	2.97947	2.10537	0	0.206486	0.3073	0.38419	17.3141	17.8141	0.499447
1.21452	0.151172	0.0391381	0.000689196	18.9182	2.97951	2.10534	0.12628	0.206935	0.387484	0.380578	17.325	17.825	0.494751
1.21568	0.152051	0.039116	0.000688689	18.9076	2.97954	2.10532	0.757678	0.207421	0.418804	0.376962	17.3343	17.8343	0.490051
1.21684	0.153516	0.0391001	0.000697566	18.8961	2.97957	2.10529	1.2628	0.207659	0.205125	0.373327	17.3428	17.8428	0.485326
1.218	0.150732	0.0390953	0.000718579	18.8851	2.9796	2.10527	-2.39931	0.207421	-0.204613	0.369769	17.3513	17.8513	0.480699
1.21916	0.152344	0.0390799	0.000726445	18.8743	2.97962	2.10525	1.38908	0.208358	0.807653	0.366469	17.3587	17.8587	0.476409
1.22032	0.153955	0.0390583	0.000727215	18.8634	2.97965	2.10522	1.38908	0.208763	0.349147	0.36297	17.367	17.867	0.471861
1.22148	0.15293	0.0390369	0.000728313	18.8524	2.97968	2.1052	-0.883957	0.208637	-0.1092	0.359477	17.3753	17.8753	0.467321
1.22264	0.153076	0.039015	0.000734414	18.8392	2.9797	2.10518	0.12628	0.209002	0.315084	0.356196	17.3801	17.8801	0.463055
1.2238	0.153076	0.0389995	0.000749369	18.8254	2.97973	2.10516	0	0.209405	0.347208	0.352933	17.3843	17.8843	0.458813
1.22496	0.153369	0.0389946	0.000775384	18.8123	2.97975	2.10514	0.252559	0.209902	0.428525	0.349673	17.3891	17.8891	0.454575
1.22612	0.154102	0.0389786	0.000788277	18.7991	2.97977	2.10513	0.631398	0.21038	0.41196	0.346377	17.394	17.894	0.45029
1.22728	0.153809	0.0389546	0.000793278	18.7853	2.97979	2.10511	-0.252559	0.210668	0.248467	0.343051	17.3985	17.8985	0.445967
1.22844	0.153662	0.0389307	0.000797262	18.7719	2.97981	2.10509	-0.12628	0.211165	0.428352	0.339769	17.4032	17.9032	0.441699
1.2296	0.154395	0.0389055	0.000804629	18.7565	2.97983	2.10508	0.631398	0.211814	0.559391	0.336446	17.406	17.906	0.43738
1.23076	0.154102	0.0388864	0.000820058	18.7408	2.97985	2.10506	-0.252559	0.212274	0.396454	0.333023	17.4091	17.9091	0.43293
1.23192	0.155566	0.0388767	0.000846029	18.7253	2.97987	2.10505	1.2628	0.212943	0.576961	0.329571	17.4127	17.9127	0.428443
1.23308	0.155273	0.038856	0.00085946	18.7096	2.97988	2.10503	-0.252559	0.213139	0.169275	0.326008	17.4166	17.9166	0.423811
1.23424	0.155713	0.0388238	0.000859807	18.6937	2.9799	2.10502	0.378839	0.213546	0.350119	0.322516	17.4199	17.9199	0.41927
1.2354	0.154248	0.0387908	0.000857791	18.6783	2.97991	2.10501	-1.2628	0.213877	0.28593	0.319011	17.4238	17.9238	0.414714
1.23656	0.155859	0.0387573	0.000857812	18.6619	2.97992	2.105	1.38908	0.214874	0.859364	0.315521	17.4265	17.9265	0.410177
1.23772	0.156592	0.0387259	0.000864544	18.6437	2.97994	2.10499	0.631398	0.215342	0.403389	0.311785	17.4289	17.9289	0.405321
1.23888	0.156299	0.0387025	0.000881563	18.6252	2.97995	2.10498	-0.252559	0.215623	0.241822	0.308009	17.4312	17.9312	0.400412
1.24004	0.158643	0.0386808	0.000898705	18.6075	2.97996	2.10497	2.02047	0.216114	0.42363	0.304263	17.434	17.934	0.395542
1.2412	0.157031	0.0386476	0.00090278	18.5896	2.97997	2.10497	-1.38908	0.215793	-0.277052	0.300462	17.437	17.937	0.390601
1.24236	0.157471	0.0386117	0.000903414	18.5717	2.97997	2.10496	0.378839	0.216194	0.346163	0.296922	17.4386	17.9386	0.385999
1.24352	0.157031	0.0385771	0.000904729	18.5541	2.97998	2.10495	-0.378839	0.216522	0.283003	0.29336	17.4407	17.9407	0.381368
1.24468	0.15791	0.0385429	0.000911402	18.5346	2.97999	2.10495	0.757678	0.217119	0.514198	0.289802	17.4407	17.9407	0.376743
1.24584	0.15791	0.0385164	0.000927558	18.5149	2.97999	2.10495	0	0.217472	0.304284	0.286144	17.4411	17.9411	0.371987
1.247	0.158496	0.0385007	0.000947432	18.499	2.98	2.10494	0.505119	0.217923	0.388735	0.282477	17.4454	17.9454	0.36722
1.24816	0.160254	0.0384733	0.000953986	18.4829	2.98	2.10494	1.51536	0.218244	0.277209	0.278762	17.4497	17.9497	0.362391
1.24932	0.158936	0.038435	0.000952722	18.4647	2.98	2.10494	-1.13652	0.217982	-0.226495	0.275048	17.4519	17.9519	0.357562
1.25048	0.159229	0.038398	0.000951063	18.4472	2.98	2.10494	0.252559	0.218329	0.299493	0.27156	17.4536	17.9536	0.353028
1.25164	0.159521	0.0383614	0.000953407	18.4282	2.98	2.10494	0.252559	0.218661	0.286202	0.268059	17.4539	17.9539	0.348477
1.2528	0.159521	0.0383303	0.000964154	18.4086	2.98	2.10494	0	0.218978	0.273037	0.26455	17.4536	17.9536	0.343915
1.25396	0.160107	0.0383087	0.000986059	18.3889	2.98	2.10494	0.505119	0.219393	0.358073	0.261038	17.4532	17.9532	0.339349
1.25512	0.160107	0.038281	0.00099796	18.3705	2.97999	2.10494	0	0.21968	0.247117	0.257481	17.4543	17.9543	0.334726
1.25628	0.164209	0.0382416	0.00099684	18.3516	2.97999	2.10495	3.53583	0.220065	0.332425	0.25393	17.455	17.955	0.330108
1.25744	0.160693	0.0382012	0.000994244	18.3328	2.97998	2.10495	-3.03071	0.218957	-0.955176	0.250342	17.4559	17.9559	0.325445
1.2586	0.16084	0.0381626	0.000995121	18.3135	2.97998	2.10496	0.12628	0.219313	0.306759	0.247298	17.4534	17.9534	0.321488
1.25976	0.161719	0.0381274	0.00100387	18.2926	2.97997	2.10496	0.757678	0.219711	0.342885	0.244228	17.4494	17.9494	0.317496
1.26092	0.161572	0.0381006	0.00102352	18.2714	2.97996	2.10497	-0.12628	0.219866	0.133979	0.241112	17.4453	17.9453	0.313446
1.26208	0.161865	0.0380744	0.00104006	18.2518	2.97995	2.10498	0.252559	0.220178	0.268397	0.238045	17.4425	17.9425	0.309459
1.26324	0.162158	0.0380371	0.00104331	18.2321	2.97994	2.10499	0.252559	0.220474	0.255822	0.234965	17.4398	17.9398	0.305454
1.2644	0.162451	0.037999	0.00104429	18.213	2.97993	2.105	0.252559	0.220757	0.243363	0.231874	17.4377	17.9377	0.301437
1.26556	0.162305	0.0379638	0.00104739	18.1944	2.97992	2.10501	-0.12628	0.221025	0.231013	0.228779	17.4362	17.9362	0.297413
1.26672	0.163037	0.0379318	0.00105784	18.1744	2.9799	2.10502	0.631398	0.221449	0.365881	0.225683	17.4332	17.9332	0.293388
1.26788	0.163037	0.0379087	0.00107866	18.1546	2.97989	2.10503	7.17817e-14	0.221689	0.206686	0.222523	17.4307	17.9307	0.28928
1.26904	0.163477	0.0378853	0.00109969	18.1344	2.97987	2.10504	0.378839	0.222029	0.292774	0.219371	17.4279	17.9279	0.285182
1.2702	0.16377	0.0378504	0.00110775	18.114	2.97986	2.10506	0.252559	0.222298	0.23188	0.216186	17.425	17.925	0.281042
1.27136	0.164062	0.0378119	0.00111163	18.0935	2.97984	2.10507	0.252559	0.222553	0.220129	0.212993	17.422	17.922	0.276891
1.27252	0.164355	0.0377759	0.00111601	18.074	2.97982	2.10509	0.252559	0.222795	0.208477	0.209798	17.4201	17.9201	0.272737
1.27368	0.164648	0.037742	0.00112695	18.0528	2.9798	2.1051	0.252559	0.223023	0.196919	0.206603	17.4165	17.9165	0.268583
1.27484	0.16582	0.0377169	0.00114801	18.0319	2.97978	2.10512	1.01024	0.223238	0.185448	0.203412	17.4131	17.9131	0.264436
1.276	0.166992	0.037691	0.00117042	18.01	2.97976	2.10514	1.01024	0.223099	-0.120164	0.200229	17.4087	17.9087	0.260298
1.27716	0.164648	0.037654	0.00117988	17.9879	2.97973	2.10516	-2.02047	0.222605	-0.425832	0.197191	17.4033	17.9033	0.256348
1.27832	0.166553	0.0376129	0.0011841	17.966	2.97971	2.10518	1.64164	0.223121	0.445217	0.194433	17.3966	17.8966	0.252764
1.27948	0.165527	0.0375742	0.00118941	17.9448	2.97969	2.1052	-0.883957	0.222999	-0.10563	0.191563	17.3912	17.8912	0.249032
1.28064	0.165527	0.0375381	0.0012002	17.9226	2.97966	2.10522	0	0.223375	0.324231	0.188826	17.3841	17.8841	0.245474
1.2818	0.166406	0.0375099	0.0012206	17.9004	2.97963	2.10524	0.757678	0.223852	0.410973	0.186028	17.3772	17.8772	0.241837
1.28296	0.166699	0.0374806	0.00124156	17.8774	2.9796	2.10526	0.252559	0.224088	0.203674	0.183129	17.3702	17.8702	0.238068
1.28412	0.167285	0.0374432	0.00125125	17.8551	2.97958	2.10529	0.505119	0.224311	0.192618	0.180221	17.3639	17.8639	0.234287
1.28528	0.166113	0.0373987	0.00125216	17.8329	2.97955	2.10531	-1.01024	0.224408	0.0835733	0.177307	17.3577	17.8577	0.230499
1.28644	0.16582	0.0373558	0.00125253	17.8116	2.97951	2.10534	-0.252559	0.225061	0.563019	0.174436	17.3522	17.8522	0.226766
1.2876	0.17373	0.0373171	0.00125704	17.7908	2.97948	2.10536	6.8191	0.22593	0.748493	0.171389	17.3482	17.8482	0.222806
1.28876	0.167432	0.0372833	0.00126982	17.769	2.97945	2.10539	-5.43002	0.223828	-1.81182	0.168082	17.3445	17.8445	0.218507
1.28992	0.168018	0.037248	0.00128262	17.7464	2.97942	2.10542	0.505119	0.224273	0.383729	0.165667	17.3352	17.8352	0.215368
1.29108	0.168604	0.0372139	0.001296	17.7241	2.97938	2.10545	0.505119	0.224592	0.27467	0.163154	17.3268	17.8268	0.212101
1.29224	0.169189	0.0371731	0.00130089	17.7021	2.97934	2.10548	0.505119	0.224784	0.165734	0.160591	17.3188	17.8188	0.208768
1.2934	0.168457	0.0371326	0.00130471	17.6806	2.97931	2.10551	-0.631398	0.22485	0.0568724	0.158026	17.3115	17.8115	0.205433
1.29456	0.169629	0.0370969	0.00131215	17.6601	2.97927	2.10554	1.01024	0.225302	0.389376	0.155506	17.3048	17.8048	0.202157
1.29572	0.170068	0.0370651	0.00132733	17.6382	2.97923	2.10557	0.378839	0.2254	0.0845647	0.15288	17.2974	17.7974	0.198744
1.29688	0.169775	0.0370322	0.00134255	17.6158	2.97919	2.1056	-0.252559	0.225429	0.0249802	0.150286	17.2892	17.7892	0.195371
1.29804	0.169922	0.0369994	0.00135811	17.5933	2.97915	2.10564	0.12628	0.225673	0.210596	0.147747	17.2807	17.7807	0.192072
1.2992	0.169189	0.0369592	0.00136411	17.5711	2.97911	2.10567	-0.631398	0.225962	0.249193	0.145181	17.2726	17.7726	0.188735
1.30036	0.170508	0.0369154	0.00136494	17.5493	2.97906	2.10571	1.13652	0.226637	0.582129	0.142568	17.2652	17.7652	0.185338
1.30152	0.170947	0.036876	0.00136805	17.5287	2.97902	2.10574	0.378839	0.226903	0.228798	0.139756	17.26	17.76	0.181683
1.30268	0.171533	0.0368402	0.00137781	17.5071	2.97897	2.10578	0.505119	0.2271	0.169797	0.136905	17.2541	17.7541	0.177976
1.30384	0.170508	0.0368059	0.0013882	17.486	2.97893	2.10582	-0.883957	0.227171	0.0618345	0.134039	17.2487	17.7487	0.17425
1.305	0.172119	0.0367702	0.00139867	17.4641	2.97888	2.10586	1.38908	0.227744	0.493317	0.131205	17.2425	17.7425	0.170567
1.30616	0.173291	0.0367284	0.00140069	17.4428	2.97883	2.1059	1.01024	0.227793	0.0423397	0.128208	17.2376	17.7376	0.166671
1.30732	0.175049	0.0366807	0.00139592	17.4213	2.97878	2.10594	1.51536	0.227489	-0.261505	0.12525	17.2325	17.7325	0.162825
1.30848	0.173877	0.0366369	0.00139233	17.4014	2.97873	2.10598	-1.01024	0.226606	-0.761618	0.122466	17.2278	17.7278	0.159206
1.30964	0.172852	0.0365978	0.00139459	17.3812	2.97868	2.10602	-0.883957	0.22628	-0.281319	0.12008	17.2208	17.7208	0.156105
1.3108	0.171387	0.0365647	0.00140078	17.3625	2.97863	2.10607	-1.2628	0.226453	0.149817	0.117876	17.2141	17.7141	0.153238
1.31196	0.173584	0.0365307	0.00140705	17.3432	2.97858	2.10611	1.89419	0.227298	0.728133	0.115656	17.2071	17.7071	0.150353
1.31312	0.17373	0.0364973	0.00141478	17.3236	2.97852	2.10615	0.12628	0.227392	0.0808319	0.113161	17.2012	17.7012	0.14711
1.31428	0.17373	0.0364583	0.00141462	17.3045	2.97847	2.1062	2.39272e-14	0.227531	0.120097	0.110681	17.1958	17.6958	0.143885
1.31544	0.173877	0.0364211	0.00141428	17.2864	2.97841	2.10625	0.12628	0.227773	0.208453	0.108196	17.1914	17.6914	0.140654
1.3166	0.174902	0.0363896	0.00141842	17.2692	2.97835	2.10629	0.883957	0.22806	0.247866	0.105666	17.1881	17.6881	0.137365
1.31776	0.174902	0.0363619	0.0014309	17.2505	2.9783	2.10634	0	0.228053	-0.00683793	0.103072	17.1836	17.6836	0.133993
1.31892	0.175342	0.0363328	0.00144265	17.2314	2.97824	2.10639	0.378839	0.228147	0.0817224	0.100527	17.1785	17.6785	0.130685
1.32008	0.174609	0.0363034	0.00145506	17.2119	2.97818	2.10644	-0.631398	0.228174	0.0232043	0.0979911	17.1729	17.6729	0.127388
1.32124	0.176074	0.0362675	0.00145877	17.1927	2.97811	2.10649	1.2628	0.228588	0.356999	0.0954887	17.1675	17.6675	0.124135
1.3224	0.17666	0.0362271	0.00145846	17.173	2.97805	2.10654	0.505119	0.228537	-0.0446112	0.0928685	17.1622	17.6622	0.120729
1.32356	0.175928	0.0361921	0.00146128	17.1547	2.97799	2.10659	-0.631398	0.22836	-0.152016	0.0903103	17.158	17.658	0.117403
1.32472	0.17666	0.0361618	0.00147109	17.1358	2.97792	2.10665	0.631398	0.228571	0.181853	0.0878612	17.1525	17.6525	0.11422
1.32588	0.176807	0.036128	0.00147964	17.1157	2.97786	2.1067	0.12628	0.228601	0.0254224	0.0853698	17.1462	17.6462	0.110981
1.32704	0.176514	0.0360934	0.00148858	17.095	2.97779	2.10676	-0.252559	0.228676	0.0651578	0.0829053	17.139	17.639	0.107777
1.3282	0.175488	0.0360537	0.00149021	17.0749	2.97772	2.10681	-0.883957	0.228969	0.252034	0.0804489	17.1324	17.6324	0.104584
1.32936	0.175781	0.0360097	0.0014851	17.0554	2.97766	2.10687	0.252559	0.229762	0.684214	0.0779152	17.1269	17.6269	0.10129
1.33052	0.178418	0.0359703	0.0014823	17.0372	2.97759	2.10693	2.27303	0.230546	0.675361	0.0751083	17.1241	17.6241	0.0976408
1.33168	0.178125	0.035937	0.00148649	17.0191	2.97752	2.10698	-0.252559	0.230409	-0.117793	0.0720311	17.123	17.623	0.0936404
1.33284	0.178711	0.0358991	0.00148888	16.9996	2.97744	2.10704	0.505119	0.23049	0.0697569	0.0690394	17.1199	17.6199	0.0897512
1.334	0.178857	0.0358596	0.00149167	16.9791	2.97737	2.1071	0.12628	0.230447	-0.0368888	0.0660473	17.1158	17.6158	0.0858615
1.33516	0.179297	0.0358255	0.0014998	16.959	2.9773	2.10716	0.378839	0.230451	0.00356293	0.0631016	17.1119	17.6119	0.0820321
1.33632	0.179297	0.0357872	0.00150092	16.9397	2.97722	2.10722	0	0.230389	-0.0540603	0.0601828	17.1087	17.6087	0.0782376
1.33748	0.179736	0.0357518	0.00150243	16.9217	2.97715	2.10729	0.378839	0.23043	0.0354052	0.0573154	17.1065	17.6065	0.07451
1.33864	0.180176	0.0357229	0.00150874	16.9049	2.97707	2.10735	0.378839	0.230404	-0.022225	0.0544579	17.1054	17.6054	0.0707952
1.3398	0.17915	0.035688	0.00151299	16.8861	2.97699	2.10741	-0.883957	0.230311	-0.0798672	0.0516349	17.1021	17.6021	0.0671254
1.34096	0.180615	0.0356522	0.00151599	16.8673	2.97691	2.10748	1.2628	0.230721	0.352834	0.0488711	17.0985	17.5985	0.0635325
1.34212	0.180322	0.0356205	0.00152435	16.8483	2.97683	2.10754	-0.252559	0.230665	-0.04795	0.0459705	17.0955	17.5955	0.0597616
1.34328	0.181348	0.0355844	0.00152542	16.8301	2.97675	2.10761	0.883957	0.230827	0.139701	0.0431121	17.093	17.593	0.0560457
1.34444	0.181055	0.0355482	0.00152553	16.8123	2.97667	2.10768	-0.252559	0.230695	-0.113928	0.0402102	17.0912	17.5912	0.0522733
1.3456	0.181934	0.035518	0.00152963	16.7958	2.97659	2.10775	0.757678	0.23078	0.0737319	0.0373778	17.0902	17.5902	0.0485911
1.34676	0.18208	0.0354833	0.00153139	16.778	2.97651	2.10781	0.12628	0.230629	-0.130876	0.034529	17.0881	17.5881	0.0448877
1.34792	0.17959	0.0354462	0.00153274	16.7593	2.97642	2.10788	-2.14675	0.230524	-0.0903552	0.0317547	17.0847	17.5847	0.0412811
1.34908	0.181934	0.0354118	0.00153809	16.7402	2.97634	2.10795	2.02047	0.23149	0.832808	0.0290354	17.0805	17.5805	0.037746
1.35024	0.182812	0.035375	0.0015367	16.7228	2.97625	2.10803	0.757678	0.23165	0.138095	0.025954	17.08	17.58	0.0337402
1.3514	0.182227	0.0353345	0.00152968	16.7058	2.97616	2.1081	-0.505119	0.231573	-0.066175	0.0228221	17.0803	17.5803	0.0296688
1.35256	0.183545	0.0352991	0.00152611	16.6899	2.97607	2.10817	1.13652	0.231828	0.219903	0.0197303	17.0813	17.5813	0.0256494
1.35372	0.183252	0.0352695	0.00152487	16.6759	2.97598	2.10825	-0.252559	0.231676	-0.131413	0.0165484	17.0848	17.5848	0.0215129
1.35488	0.184277	0.0352342	0.00152184	16.6598	2.97589	2.10832	0.883957	0.231742	0.0566284	0.0134331	17.0859	17.5859	0.017463
1.35604	0.184131	0.0351973	0.00152087	16.6421	2.9758	2.1084	-0.12628	0.231513	-0.196645	0.0102983	17.0854	17.5854	0.0133878
1.3572	0.184424	0.0351667	0.00152609	16.6249	2.97571	2.10847	0.252559	0.231447	-0.0577034	0.00725675	17.085	17.585	0.00943378
1.35836	0.183838	0.0351329	0.00152512	16.6087	2.97561	2.10855	-0.505119	0.23137	-0.0659017	0.00424447	17.0854	17.5854	0.00551781
1.35952	0.184863	0.0351027	0.00152594	16.5936	2.97552	2.10863	0.883957	0.231625	0.220096	0.00126378	17.0866	17.5866	0.00164291
1.36068	0.18501	0.0350793	0.00153184	16.5797	2.97542	2.10871	0.12628	0.231587	-0.0332216	-0.00181549	17.0896	17.5896	-0.00236013
1.36184	0.186621	0.0350485	0.00153514	16.5632	2.97533	2.10879	1.38908	0.231596	0.00767155	-0.00488061	17.09	17.59	-0.00634479
1.363	0.186035	0.0350162	0.0015383	16.5461	2.97523	2.10887	-0.505119	0.231083	-0.441809	-0.00795138	17.0898	17.5898	-0.0103368
1.36416	0.186035	0.0349897	0.00154766	16.5292	2.97513	2.10895	0	0.230902	-0.155922	-0.0108267	17.0887	17.5887	-0.0140747
1.36532	0.186914	0.0349596	0.00155111	16.513	2.97503	2.10903	0.757678	0.230826	-0.066256	-0.0136367	17.088	17.588	-0.0177277
1.36648	0.186914	0.0349294	0.00155417	16.4969	2.97493	2.10911	0	0.230511	-0.270847	-0.016423	17.0872	17.5872	-0.0213499
1.36764	0.187793	0.0349056	0.00156177	16.4821	2.97483	2.1092	0.757678	0.230301	-0.181334	-0.0190946	17.0872	17.5872	-0.024823
1.3688	0.184863	0.0348739	0.00156678	16.4645	2.97472	2.10928	-2.52559	0.229853	-0.386129	-0.0216932	17.0838	17.5838	-0.0282012
1.36996	0.185889	0.0348401	0.00156947	16.4468	2.97462	2.10937	0.883957	0.230646	0.683886	-0.0241276	17.0795	17.5795	-0.0313659
1.37112	0.187646	0.0348105	0.00157672	16.4293	2.97451	2.10945	1.51536	0.231145	0.430188	-0.026881	17.0771	17.5771	-0.0349453
1.37228	0.186328	0.0347792	0.0015789	16.413	2.97441	2.10954	-1.13652	0.231066	-0.068506	-0.0298402	17.0772	17.5772	-0.0387923
1.37344	0.187793	0.0347463	0.00157657	16.3979	2.9743	2.10963	1.2628	0.231603	0.462564	-0.032782	17.0782	17.5782	-0.0426167
1.3746	0.188379	0.0347191	0.00157716	16.3843	2.97419	2.10972	0.505119	0.231675	0.0621233	-0.035947	17.082	17.582	-0.0467311
1.37576	0.188525	0.0346859	0.00157377	16.3694	2.97408	2.10981	0.12628	0.231623	-0.0440629	-0.0391561	17.0847	17.5847	-0.050903
1.37692	0.188818	0.0346472	0.0015689	16.3524	2.97397	2.1099	0.252559	0.23162	-0.00315517	-0.0423631	17.0854	17.5854	-0.055072
1.37808	0.189404	0.0346114	0.00156859	16.335	2.97386	2.10999	0.505119	0.231607	-0.0112862	-0.0455877	17.0857	17.5857	-0.0592639
1.37924	0.189551	0.0345839	0.00157558	16.3186	2.97375	2.11008	0.12628	0.23147	-0.117498	-0.0488277	17.0871	17.5871	-0.063476
1.3804	0.191895	0.0345547	0.00157778	16.3034	2.97364	2.11017	2.02047	0.231382	-0.07665	-0.0520368	17.0896	17.5896	-0.0676478
1.38156	0.18999	0.03453	0.00158289	16.2891	2.97352	2.11027	-1.64164	0.230487	-0.771403	-0.0552348	17.0929	17.5929	-0.0718053
1.38272	0.190283	0.0345012	0.00158267	16.2751	2.97341	2.11036	0.252559	0.230435	-0.0444078	-0.0581102	17.0947	17.5947	-0.0755433
1.38388	0.189844	0.0344652	0.00158014	16.2585	2.97329	2.11046	-0.378839	0.230374	-0.0529983	-0.0609918	17.0939	17.5939	-0.0792893
1.38504	0.190283	0.0344324	0.00158134	16.2419	2.97318	2.11055	0.378839	0.230587	0.183575	-0.063877	17.0932	17.5932	-0.0830401
1.3862	0.190869	0.0344063	0.00158931	16.2258	2.97306	2.11065	0.505119	0.230733	0.126004	-0.0668736	17.0936	17.5936	-0.0869357
1.38736	0.191309	0.0343776	0.00159194	16.2106	2.97294	2.11075	0.378839	0.230755	0.0194534	-0.0699572	17.0954	17.5954	-0.0909443
1.38852	0.193213	0.0343497	0.00159501	16.1957	2.97282	2.11085	1.64164	0.230711	-0.0380517	-0.073081	17.0976	17.5976	-0.0950053
1.38968	0.193066	0.0343181	0.00159276	16.1811	2.9727	2.11095	-0.12628	0.230032	-0.585952	-0.0762206	17.1003	17.6003	-0.0990868
1.39084	0.194824	0.0342782	0.0015871	16.1639	2.97258	2.11105	1.51536	0.229512	-0.447587	-0.0791306	17.0991	17.5991	-0.10287
1.392	0.193799	0.0342371	0.00158435	16.1448	2.97245	2.11115	-0.883958	0.228414	-0.946915	-0.0818746	17.0951	17.5951	-0.106437
1.39316	0.192773	0.0342009	0.00158809	16.1255	2.97233	2.11125	-0.883957	0.227817	-0.51495	-0.0842289	17.0888	17.5888	-0.109498
1.39432	0.193066	0.0341647	0.00158843	16.1076	2.9722	2.11135	0.252559	0.22772	-0.0832181	-0.0863892	17.0828	17.5828	-0.112306
1.39548	0.193213	0.034127	0.00158508	16.0905	2.97208	2.11146	0.12628	0.227612	-0.0928638	-0.088551	17.0776	17.5776	-0.115116
1.39664	0.193506	0.0340895	0.00157722	16.0753	2.97195	2.11156	0.252559	0.22755	-0.0535138	-0.0907108	17.0742	17.5742	-0.117924
1.3978	0.193652	0.0340462	0.0015654	16.059	2.97182	2.11167	0.12628	0.227477	-0.0632259	-0.0928873	17.0699	17.5699	-0.120754
1.39896	0.196143	0.0339997	0.00155538	16.0403	2.97169	2.11177	2.14675	0.227449	-0.0239276	-0.0950772	17.0632	17.5632	-0.1236
1.40012	0.196436	0.0339574	0.00155129	16.0212	2.97156	2.11188	0.252559	0.226557	-0.769247	-0.0972992	17.0564	17.5564	-0.126489
1.40128	0.193652	0.0339239	0.00155559	16.003	2.97143	2.11199	-2.39931	0.225653	-0.779343	-0.0992185	17.0487	17.5487	-0.128984
1.40244	0.194971	0.033889	0.00155565	15.9859	2.9713	2.1121	1.13652	0.225931	0.240002	-0.100831	17.0404	17.5404	-0.131081
1.4036	0.195264	0.0338585	0.00155889	15.9696	2.97117	2.11221	0.252559	0.225799	-0.113603	-0.102598	17.0339	17.5339	-0.133377
1.40476	0.196582	0.0338239	0.00155732	15.9532	2.97103	2.11232	1.13652	0.225656	-0.123995	-0.104359	17.0272	17.5272	-0.135667
1.40592	0.195557	0.0337818	0.00155344	15.9342	2.9709	2.11243	-0.883957	0.225101	-0.477706	-0.106112	17.0178	17.5178	-0.137946
1.40708	0.195996	0.033743	0.00155438	15.9147	2.97076	2.11254	0.378839	0.225047	-0.0470293	-0.107697	17.0071	17.5071	-0.140006
1.40824	0.196143	0.0337115	0.00156289	15.8958	2.97063	2.11265	0.12628	0.224923	-0.106751	-0.10931	16.997	17.497	-0.142103
1.4094	0.196729	0.0336783	0.00156771	15.8775	2.97049	2.11277	0.505119	0.224844	-0.068444	-0.110924	16.9876	17.4876	-0.144201
1.41056	0.195996	0.0336441	0.00157269	15.8587	2.97035	2.11288	-0.631398	0.224638	-0.177284	-0.112556	16.9778	17.4778	-0.146323
1.41172	0.199951	0.0336058	0.00157177	15.8403	2.97021	2.113	3.40955	0.224818	0.15514	-0.11416	16.9681	17.4681	-0.148408
1.41288	0.19834	0.0335601	0.00156772	15.8195	2.97007	2.11311	-1.38908	0.223563	-1.08158	-0.115885	16.9569	17.4569	-0.150651
1.41404	0.197168	0.0335156	0.00156712	15.798	2.96993	2.11323	-1.01024	0.223035	-0.455347	-0.117175	16.9424	17.4424	-0.152328
1.4152	0.1979	0.0334765	0.00157383	15.776	2.96978	2.11335	0.631398	0.223062	0.0235655	-0.118313	16.9267	17.4267	-0.153807
1.41636	0.198193	0.0334408	0.00157904	15.7563	2.96964	2.11347	0.252559	0.222906	-0.135002	-0.119514	16.9137	17.4137	-0.155369
1.41752	0.198193	0.0334043	0.0015814	15.7374	2.96949	2.11359	1.43563e-13	0.222736	-0.146517	-0.120709	16.9013	17.4013	-0.156922
1.41868	0.199072	0.0333629	0.00157731	15.7188	2.96935	2.11371	0.757678	0.222666	-0.0600224	-0.121892	16.8892	17.3892	-0.15846
1.41984	0.198047	0.033316	0.00156982	15.6989	2.9692	2.11383	-0.883957	0.222356	-0.267783	-0.123103	16.876	17.376	-0.160034
1.421	0.198486	0.033267	0.00156468	15.677	2.96905	2.11395	0.378839	0.222543	0.161829	-0.124249	16.8603	17.3603	-0.161523
1.42216	0.199219	0.0332226	0.00156575	15.6548	2.9689	2.11407	0.631398	0.222661	0.101135	-0.125523	16.8451	17.3451	-0.16318
1.42332	0.199512	0.033187	0.00157604	15.633	2.96875	2.11419	0.252559	0.222594	-0.0575888	-0.1269	16.831	17.331	-0.16497
1.42448	0.199805	0.0331502	0.0015832	15.6121	2.9686	2.11432	0.252559	0.222514	-0.069225	-0.128308	16.8177	17.3177	-0.1668
1.42564	0.200244	0.0331074	0.00158282	15.5912	2.96845	2.11444	0.378839	0.22242	-0.0808922	-0.129742	16.8048	17.3048	-0.168665
1.4268	0.200391	0.0330597	0.00157793	15.5698	2.9683	2.11457	0.12628	0.222255	-0.141634	-0.131199	16.7914	17.2914	-0.170558
1.42796	0.201123	0.0330081	0.00157513	15.5457	2.96814	2.1147	0.631398	0.222134	-0.104364	-0.13265	16.7752	17.2752	-0.172446
1.42912	0.200977	0.0329611	0.00157853	15.5212	2.96799	2.11482	-0.12628	0.221829	-0.263293	-0.134115	16.7588	17.2588	-0.17435
1.43028	0.201123	0.0329219	0.00159145	15.4966	2.96783	2.11495	0.12628	0.22168	-0.128112	-0.135521	16.742	17.242	-0.176178
1.43144	0.200684	0.0328808	0.00160123	15.4725	2.96768	2.11508	-0.378839	0.221575	-0.0910655	-0.136931	16.7256	17.2256	-0.17801
1.4326	0.201563	0.0328317	0.00160239	15.4478	2.96752	2.11521	0.757678	0.22174	0.142091	-0.138361	16.7088	17.2088	-0.17987
1.43376	0.201855	0.0327781	0.00159822	15.4233	2.96736	2.11534	0.252559	0.221663	-0.0660276	-0.139918	16.6929	17.1929	-0.181894
1.43492	0.202295	0.0327203	0.00159505	15.3962	2.9672	2.11547	0.378839	0.221572	-0.0780267	-0.141508	16.6745	17.1745	-0.18396
1.43608	0.202881	0.0326657	0.00159754	15.3684	2.96704	2.11561	0.505119	0.221411	-0.139097	-0.143127	16.6556	17.1556	-0.186065
1.43724	0.203906	0.0326185	0.00160873	15.3407	2.96688	2.11574	0.883957	0.221122	-0.249268	-0.144747	16.6368	17.1368	-0.188171
1.4384	0.202881	0.0325708	0.00161762	15.3136	2.96671	2.11587	-0.883957	0.220534	-0.506666	-0.14632	16.6184	17.1184	-0.190216
1.43956	0.20332	0.0325132	0.00161404	15.2868	2.96655	2.11601	0.378839	0.220444	-0.0777612	-0.147731	16.5993	17.0993	-0.192051
1.44072	0.203467	0.0324502	0.00160404	15.26	2.96638	2.11614	0.12628	0.220282	-0.139271	-0.149174	16.5805	17.0805	-0.193926
1.44188	0.203613	0.0323841	0.00159366	15.2319	2.96622	2.11628	0.12628	0.220163	-0.102766	-0.150621	16.5603	17.0603	-0.195807
1.44304	0.204199	0.0323173	0.0015873	15.2017	2.96605	2.11642	0.505119	0.220086	-0.0663086	-0.152089	16.5382	17.0382	-0.197716
1.4442	0.205078	0.0322561	0.00158881	15.1711	2.96588	2.11656	0.757678	0.219881	-0.176995	-0.153596	16.5159	17.0159	-0.199675
1.44536	0.204492	0.0322052	0.00160065	15.1412	2.96572	2.1167	-0.505119	0.219433	-0.385835	-0.155093	16.4942	16.9942	-0.201621
1.44652	0.20625	0.0321535	0.00160524	15.114	2.96555	2.11684	1.51536	0.219312	-0.104472	-0.156486	16.4746	16.9746	-0.203431
1.44768	0.204932	0.0320947	0.00160231	15.0863	2.96537	2.11698	-1.13652	0.218607	-0.607761	-0.157902	16.4548	16.9548	-0.205272
1.44884	0.206836	0.0320313	0.00159515	15.0582	2.9652	2.11712	1.64164	0.218513	-0.0815302	-0.159115	16.4333	16.9333	-0.20685
1.45	0.204639	0.0319659	0.00159091	15.0278	2.96503	2.11726	-1.89419	0.217777	-0.634167	-0.160364	16.4098	16.9098	-0.208473
1.45116	0.205957	0.0319057	0.00159371	14.9971	2.96486	2.1174	1.13652	0.217993	0.185969	-0.161399	16.3848	16.8848	-0.209818
1.45232	0.207129	0.0318542	0.00160657	14.9665	2.96468	2.11755	1.01024	0.217795	-0.170719	-0.16259	16.3608	16.8608	-0.211367
1.45348	0.209326	0.0318004	0.00161769	14.9356	2.96451	2.11769	1.89419	0.21724	-0.478446	-0.163778	16.3364	16.8364	-0.212911
1.45464	0.206543	0.0317344	0.00161744	14.9033	2.96433	2.11784	-2.39931	0.215929	-1.12965	-0.164824	16.3098	16.8098	-0.214271
1.4558	0.207129	0.0316633	0.00161131	14.8709	2.96415	2.11798	0.505119	0.215797	-0.114084	-0.165435	16.2808	16.7808	-0.215066
1.45696	0.207129	0.0315906	0.00160674	14.8372	2.96397	2.11813	0	0.215534	-0.226434	-0.16607	16.2505	16.7505	-0.215891
1.45812	0.207568	0.0315218	0.00160784	14.803	2.96379	2.11828	0.378839	0.215369	-0.142737	-0.166677	16.2197	16.7197	-0.21668
1.45928	0.208008	0.0314608	0.00161874	14.7685	2.96361	2.11843	0.378839	0.21513	-0.206216	-0.167295	16.1887	16.6887	-0.217484
1.46044	0.206982	0.0314044	0.00162982	14.7363	2.96343	2.11858	-0.883957	0.214817	-0.26979	-0.167896	16.1597	16.6597	-0.218265
1.4616	0.205957	0.0313362	0.00162844	14.7034	2.96325	2.11873	-0.883957	0.214999	0.156895	-0.168451	16.1299	16.6299	-0.218986
1.46276	0.210791	0.0312624	0.00161982	14.6708	2.96306	2.11888	4.16723	0.215676	0.583649	-0.169152	16.1011	16.6011	-0.219898
1.46392	0.20874	0.0311869	0.00161165	14.6371	2.96288	2.11903	-1.76791	0.214573	-0.950847	-0.170192	16.0732	16.5732	-0.22125
1.46508	0.209033	0.0311127	0.00160806	14.6021	2.96269	2.11918	0.252559	0.214363	-0.180992	-0.170881	16.042	16.542	-0.222145
1.46624	0.209619	0.0310463	0.00161371	14.5672	2.96251	2.11934	0.505119	0.214136	-0.195826	-0.171565	16.0108	16.5108	-0.223035
1.4674	0.209473	0.0309909	0.0016311	14.5329	2.96232	2.11949	-0.12628	0.213777	-0.308822	-0.172239	15.9802	16.4802	-0.22391
1.46856	0.209766	0.0309235	0.00163519	14.4982	2.96213	2.11965	0.252559	0.213572	-0.176768	-0.17285	15.9488	16.4488	-0.224705
1.46972	0.210059	0.0308493	0.00163232	14.4629	2.96194	2.1198	0.252559	0.21335	-0.191909	-0.17346	15.9169	16.4169	-0.225498
1.47088	0.212109	0.0307745	0.00162882	14.4277	2.96175	2.11996	1.76791	0.213109	-0.207134	-0.174062	15.885	16.385	-0.22628
1.47204	0.210205	0.0306994	0.00162879	14.3908	2.96156	2.12012	-1.64164	0.212169	-0.810908	-0.174649	15.8514	16.3514	-0.227043
1.4732	0.210645	0.0306312	0.0016372	14.3539	2.96137	2.12027	0.378839	0.212063	-0.091025	-0.174949	15.8161	16.3161	-0.227433
1.47436	0.210498	0.0305729	0.0016557	14.3177	2.96117	2.12043	-0.12628	0.211882	-0.155789	-0.175287	15.7818	16.2818	-0.227873
1.47552	0.208887	0.0305033	0.00166175	14.2811	2.96098	2.12059	-1.38908	0.211854	-0.0244707	-0.175633	15.747	16.247	-0.228323
1.47668	0.211523	0.0304212	0.00165452	14.2437	2.96078	2.12075	2.27303	0.212547	0.597213	-0.176048	15.712	16.212	-0.228863
1.47784	0.209619	0.0303372	0.00164529	14.2064	2.96059	2.12092	-1.64164	0.212311	-0.202929	-0.176811	15.6788	16.1788	-0.229855
1.479	0.21167	0.0302539	0.00163817	14.1684	2.96039	2.12108	1.76791	0.212911	0.517009	-0.177563	15.645	16.145	-0.230832
1.48016	0.211963	0.0301752	0.00163784	14.1299	2.96019	2.12124	0.252559	0.21281	-0.0868414	-0.178627	15.6123	16.1123	-0.232215
1.48132	0.211523	0.0301055	0.00164733	14.0918	2.95999	2.12141	-0.378839	0.212692	-0.102278	-0.179733	15.5803	16.0803	-0.233652
1.48248	0.212988	0.030044	0.00165288	14.0594	2.95979	2.12157	1.2628	0.21284	0.12743	-0.180873	15.5542	16.0542	-0.235135
1.48364	0.213281	0.0299707	0.00164543	14.0264	2.95959	2.12174	0.252559	0.212514	-0.280297	-0.182152	15.5283	16.0283	-0.236798
1.4848	0.212695	0.0298936	0.00163405	13.9933	2.95939	2.1219	-0.505119	0.212171	-0.295847	-0.183388	15.5019	16.0019	-0.238404
1.48596	0.214893	0.0298175	0.00162395	13.9601	2.95919	2.12207	1.89419	0.212151	-0.0173034	-0.184572	15.4753	15.9753	-0.239944
1.48712	0.213867	0.0297444	0.00161981	13.926	2.95898	2.12224	-0.883957	0.211373	-0.670488	-0.185832	15.4481	15.9481	-0.241581
1.48828	0.214014	0.02968	0.0016252	13.8922	2.95878	2.12241	0.12628	0.211089	-0.245141	-0.186873	15.42	15.92	-0.242935
1.48944	0.2146	0.0296268	0.00163847	13.8606	2.95857	2.12258	0.505119	0.210843	-0.212207	-0.187889	15.394	15.894	-0.244255
1.4906	0.2146	0.0295621	0.001639	13.8287	2.95836	2.12275	0	0.210464	-0.326482	-0.188893	15.3676	15.8676	-0.245561
1.49176	0.214746	0.0294903	0.00163313	13.7958	2.95815	2.12292	0.12628	0.21018	-0.244753	-0.189835	15.3399	15.8399	-0.246786
1.49292	0.210791	0.0294189	0.00162716	13.7632	2.95795	2.12309	-3.40955	0.209934	-0.212172	-0.190753	15.3124	15.8124	-0.247979
1.49408	0.214014	0.0293496	0.00162578	13.7298	2.95774	2.12326	2.77815	0.211318	1.19337	-0.191661	15.284	15.784	-0.249159
1.49524	0.214746	0.0292895	0.00163338	13.6972	2.95752	2.12344	0.631398	0.211546	0.196601	-0.193193	15.2598	15.7598	-0.251151
1.4964	0.216064	0.02924	0.00165107	13.6656	2.95731	2.12361	1.13652	0.211585	0.0335603	-0.1949	15.2376	15.7376	-0.25337
1.49756	0.217822	0.0291783	0.00165602	13.6333	2.9571	2.12379	1.51536	0.211208	-0.325615	-0.196711	15.2152	15.7152	-0.255724
1.49872	0.216211	0.0291045	0.00164826	13.6003	2.95689	2.12396	-1.38908	0.210243	-0.832052	-0.198463	15.1918	15.6918	-0.258002
1.49988	0.216797	0.0290302	0.00163931	13.5675	2.95667	2.12414	0.505119	0.209998	-0.210992	-0.19993	15.1671	15.6671	-0.259909
1.50104	0.217236	0.0289575	0.00163357	13.5343	2.95645	2.12432	0.378839	0.20962	-0.325596	-0.201392	15.1419	15.6419	-0.261809
1.5022	0.22002	0.0288914	0.00163654	13.5006	2.95624	2.1245	2.39931	0.209166	-0.391308	-0.202798	15.116	15.616	-0.263637
1.50336	0.211963	0.0288338	0.00165042	13.4666	2.95602	2.12467	-6.94538	0.207726	-1.2418	-0.204119	15.0893	15.5893	-0.265354
1.50452	0.217676	0.0287671	0.00165268	13.4329	2.9558	2.12485	4.92491	0.209507	1.53594	-0.204972	15.0603	15.5603	-0.266464
1.50568	0.217969	0.0286881	0.00164193	13.3986	2.95558	2.12504	0.252559	0.209165	-0.295173	-0.20661	15.035	15.535	-0.268593
1.50684	0.218262	0.0286078	0.00162945	13.3644	2.95536	2.12522	0.252559	0.208803	-0.312025	-0.208208	15.0095	15.5095	-0.27067
1.508	0.218994	0.0285302	0.00161907	13.3306	2.95514	2.1254	0.631398	0.208421	-0.329016	-0.209759	14.9842	15.4842	-0.272687
1.50916	0.218115	0.0284572	0.00161548	13.2963	2.95492	2.12558	-0.757678	0.207849	-0.49327	-0.211257	14.9582	15.4582	-0.274634
1.51032	0.216943	0.0283939	0.00162224	13.2624	2.95469	2.12577	-1.01024	0.207712	-0.11833	-0.212627	14.9319	15.4319	-0.276415
1.51148	0.217236	0.028332	0.00162945	13.2291	2.95447	2.12595	0.252559	0.208123	0.354634	-0.21404	14.9063	15.4063	-0.278252
1.51264	0.219434	0.028258	0.00162365	13.1951	2.95424	2.12614	1.89419	0.208515	0.337378	-0.215709	14.8815	15.3815	-0.280422
1.5138	0.219434	0.0281808	0.00161446	13.1611	2.95402	2.12632	0	0.208147	-0.317218	-0.217627	14.858	15.358	-0.282915
1.51496	0.221777	0.0281058	0.00160627	13.1276	2.95379	2.12651	2.02047	0.207872	-0.236389	-0.2195	14.8349	15.3349	-0.285351
1.51612	0.22002	0.0280339	0.00160375	13.0934	2.95356	2.1267	-1.51536	0.206782	-0.940272	-0.221366	14.8109	15.3109	-0.287776
1.51728	0.219434	0.0279712	0.00161048	13.0598	2.95333	2.12689	-0.505119	0.206467	-0.271518	-0.222908	14.7858	15.2858	-0.289781
1.51844	0.220605	0.0279088	0.00161711	13.0265	2.9531	2.12708	1.01024	0.206472	0.00480948	-0.224428	14.7609	15.2609	-0.291756
1.5196	0.220898	0.0278347	0.00161127	12.9925	2.95287	2.12727	0.252559	0.206116	-0.307315	-0.226051	14.7358	15.2358	-0.293867
1.52076	0.221191	0.0277521	0.00159599	12.9583	2.95264	2.12746	0.252559	0.205738	-0.32535	-0.227638	14.7103	15.2103	-0.295929
1.52192	0.215625	0.0276702	0.00158032	12.9246	2.9524	2.12765	-4.79863	0.20534	-0.343531	-0.229181	14.6851	15.1851	-0.297935
1.52308	0.22207	0.0275925	0.00156895	12.8911	2.95217	2.12784	5.5563	0.207196	1.59964	-0.230672	14.6598	15.1598	-0.299873
1.52424	0.220898	0.0275215	0.00156625	12.8574	2.95194	2.12804	-1.01024	0.206642	-0.477559	-0.232987	14.6389	15.1389	-0.302883
1.5254	0.22207	0.0274548	0.00156481	12.8253	2.9517	2.12823	1.01024	0.206636	-0.00501207	-0.235193	14.6189	15.1189	-0.305751
1.52656	0.224121	0.0273887	0.00155857	12.7955	2.95146	2.12843	1.76791	0.206268	-0.317072	-0.237502	14.6017	15.1017	-0.308752
1.52772	0.222363	0.0273131	0.00154259	12.765	2.95122	2.12862	-1.51536	0.205197	-0.923503	-0.239775	14.5837	15.0837	-0.311708
1.52888	0.222656	0.0272368	0.00152511	12.7347	2.95098	2.12882	0.252559	0.2049	-0.255365	-0.24174	14.5643	15.0643	-0.314263
1.53004	0.222949	0.0271638	0.00151078	12.7048	2.95075	2.12902	0.252559	0.204583	-0.273873	-0.2437	14.5451	15.0451	-0.316809
1.5312	0.223242	0.0270968	0.00150429	12.6746	2.9505	2.12921	0.252559	0.204243	-0.292503	-0.245645	14.5256	15.0256	-0.319339
1.53236	0.223682	0.0270402	0.00150205	12.6478	2.95026	2.12941	0.378839	0.203882	-0.311266	-0.24757	14.5094	15.0094	-0.32184
1.53352	0.223682	0.0269839	0.00150021	12.6209	2.95002	2.12961	0	0.203443	-0.379206	-0.249465	14.4929	14.9929	-0.324305
1.53468	0.226758	0.0269189	0.00148943	12.5934	2.94978	2.12981	2.65187	0.203094	-0.300203	-0.251303	14.4756	14.9756	-0.326693
1.53584	0.224268	0.0268538	0.00147794	12.5662	2.94953	2.13002	-2.14675	0.201643	-1.25113	-0.253118	14.4584	14.9584	-0.329053
1.537	0.223389	0.0267924	0.00146986	12.5394	2.94929	2.13022	-0.757678	0.20125	-0.339184	-0.254484	14.4391	14.9391	-0.330829
1.53816	0.224707	0.0267371	0.00146988	12.5123	2.94904	2.13042	1.13652	0.201288	0.033194	-0.255811	14.4193	14.9193	-0.332554
1.53932	0.227344	0.0266858	0.00147138	12.4865	2.94879	2.13062	2.27303	0.200905	-0.329982	-0.257269	14.4015	14.9015	-0.33445
1.54048	0.225586	0.026635	0.00147326	12.4608	2.94854	2.13083	-1.51536	0.199589	-1.13465	-0.258694	14.3836	14.8836	-0.336302
1.54164	0.224121	0.0265741	0.00146537	12.4342	2.94829	2.13103	-1.2628	0.199045	-0.468685	-0.259724	14.3627	14.8627	-0.337642
1.5428	0.220312	0.0265113	0.00145511	12.4076	2.94804	2.13124	-3.28327	0.19916	0.0989879	-0.260661	14.3413	14.8413	-0.338859
1.54396	0.223535	0.0264521	0.00144688	12.3819	2.94779	2.13145	2.77815	0.200844	1.45131	-0.261759	14.3216	14.8216	-0.340287
1.54512	0.224854	0.0263991	0.0014437	12.3572	2.94754	2.13166	1.13652	0.201366	0.450471	-0.263629	14.3072	14.8072	-0.342717
1.54628	0.228076	0.0263559	0.00145053	12.3332	2.94729	2.13186	2.77815	0.201468	0.0873267	-0.26582	14.2952	14.7952	-0.345567
1.54744	0.226904	0.0263126	0.00145773	12.309	2.94703	2.13207	-1.01024	0.200408	-0.91327	-0.268171	14.284	14.784	-0.348623
1.5486	0.226758	0.0262579	0.00145266	12.2843	2.94678	2.13228	-0.12628	0.199894	-0.443143	-0.270231	14.2706	14.7706	-0.351301
1.54976	0.227051	0.0261962	0.00143945	12.2595	2.94652	2.13249	0.252559	0.199527	-0.316481	-0.272214	14.2566	14.7566	-0.353878
1.55092	0.227783	0.0261366	0.00142689	12.2354	2.94626	2.13271	0.631398	0.199136	-0.337076	-0.274176	14.2433	14.7433	-0.356429
1.55208	0.226318	0.0260827	0.00141993	12.2118	2.946	2.13292	-1.2628	0.19855	-0.504934	-0.27611	14.2304	14.7304	-0.358943
1.55324	0.228369	0.0260367	0.0014213	12.1887	2.94575	2.13313	1.76791	0.198623	0.0625466	-0.277941	14.2173	14.7173	-0.361323
1.5544	0.228223	0.0259904	0.00142276	12.1653	2.94549	2.13334	-0.12628	0.197989	-0.546853	-0.279925	14.2049	14.7049	-0.363902
1.55556	0.228369	0.0259443	0.00142486	12.1419	2.94523	2.13356	0.12628	0.1975	-0.42093	-0.281789	14.1917	14.6917	-0.366326
1.55672	0.228516	0.0258914	0.00141881	12.1184	2.94496	2.13377	0.12628	0.197044	-0.393273	-0.28359	14.1782	14.6782	-0.368667
1.55788	0.229248	0.0258388	0.00141202	12.0954	2.9447	2.13399	0.631398	0.19662	-0.365794	-0.285342	14.1648	14.6648	-0.370945
1.55904	0.228809	0.025791	0.00140945	12.073	2.94444	2.13421	-0.378839	0.196	-0.53463	-0.287058	14.1518	14.6518	-0.373175
1.5602	0.229248	0.02575	0.0014152	12.0505	2.94417	2.13443	0.378839	0.195638	-0.311404	-0.288662	14.1382	14.6382	-0.375261
1.56136	0.229395	0.0257081	0.00142023	12.0279	2.94391	2.13464	0.12628	0.195195	-0.382546	-0.290256	14.1243	14.6243	-0.377333
1.56252	0.229834	0.0256664	0.00142589	12.0051	2.94364	2.13486	0.378839	0.194782	-0.355785	-0.291808	14.11	14.61	-0.379351
1.56368	0.230127	0.0256173	0.00142367	11.982	2.94337	2.13508	0.252559	0.194286	-0.427259	-0.293332	14.0953	14.5953	-0.381331
1.56484	0.229687	0.0255654	0.00141851	11.9586	2.9431	2.13531	-0.378839	0.193764	-0.449888	-0.294795	14.08	14.58	-0.383234
1.566	0.230127	0.0255171	0.00141565	11.9361	2.94283	2.13553	0.378839	0.1935	-0.227531	-0.296188	14.0651	14.5651	-0.385045
1.56716	0.230273	0.0254744	0.00141947	11.9136	2.94256	2.13575	0.12628	0.193153	-0.299503	-0.297613	14.0504	14.5504	-0.386896
1.56832	0.230859	0.0254304	0.00142229	11.8908	2.94229	2.13597	0.505119	0.192836	-0.273534	-0.299036	14.0355	14.5355	-0.388747
1.56948	0.231006	0.0253856	0.00142519	11.8676	2.94202	2.1362	0.12628	0.192378	-0.394802	-0.300471	14.0202	14.5202	-0.390612
1.57064	0.230859	0.0253339	0.00141994	11.8444	2.94175	2.13642	-0.12628	0.19195	-0.369134	-0.301863	14.0047	14.5047	-0.392422
1.5718	0.231738	0.025277	0.00140763	11.8216	2.94147	2.13665	0.757678	0.191665	-0.245557	-0.303225	13.9893	14.4893	-0.394193
1.57296	0.23291	0.0252228	0.00139733	11.7992	2.9412	2.13687	1.01024	0.191125	-0.465355	-0.304614	13.9746	14.4746	-0.395998
1.57412	0.23291	0.0251743	0.00139344	11.7771	2.94092	2.1371	0	0.190216	-0.783439	-0.305929	13.9597	14.4597	-0.397708
1.57528	0.233643	0.0251227	0.00138879	11.7537	2.94065	2.13733	0.631398	0.189393	-0.709573	-0.30703	13.9423	14.4423	-0.399139
1.57644	0.232031	0.0250705	0.00138533	11.7295	2.94037	2.13756	-1.38908	0.188371	-0.881216	-0.307949	13.9232	14.4232	-0.400334
1.5776	0.232617	0.0250223	0.00138633	11.7054	2.94009	2.13779	0.505119	0.188059	-0.26865	-0.30861	13.9027	14.4027	-0.401193
1.57876	0.23291	0.0249681	0.00137999	11.6814	2.93981	2.13802	0.252559	0.187605	-0.391772	-0.309289	13.8825	14.3825	-0.402076
1.57992	0.233057	0.0249159	0.00137455	11.6581	2.93953	2.13825	0.12628	0.187121	-0.416997	-0.309931	13.8627	14.3627	-0.40291
1.58108	0.233203	0.0248694	0.00137385	11.6355	2.93925	2.13848	0.12628	0.186665	-0.39337	-0.310525	13.8434	14.3434	-0.403682
1.58224	0.233057	0.0248248	0.00137321	11.6139	2.93897	2.13871	-0.12628	0.186236	-0.369921	-0.311081	13.8248	14.3248	-0.404405
1.5834	0.233789	0.0247794	0.00137238	11.592	2.93868	2.13894	0.631398	0.185947	-0.248563	-0.311611	13.8058	14.3058	-0.405094
1.58456	0.233496	0.0247351	0.00137491	11.5692	2.9384	2.13918	-0.252559	0.185458	-0.421544	-0.312169	13.7861	14.2861	-0.40582
1.58572	0.233936	0.0246843	0.00136954	11.5465	2.93811	2.13941	0.378839	0.185167	-0.251449	-0.312678	13.7662	14.2662	-0.406481
1.58688	0.234229	0.0246303	0.00136203	11.5231	2.93783	2.13965	0.252559	0.184788	-0.326658	-0.313214	13.7458	14.2458	-0.407179
1.58804	0.234521	0.0245816	0.00135844	11.5007	2.93754	2.13989	0.252559	0.184378	-0.352975	-0.313745	13.7263	14.2263	-0.407868
1.5892	0.234521	0.0245388	0.00136206	11.4782	2.93725	2.14012	0	0.183938	-0.379452	-0.314258	13.7066	14.2066	-0.408535
1.59036	0.234961	0.0244935	0.00136464	11.4549	2.93696	2.14036	0.378839	0.183581	-0.308023	-0.314741	13.6859	14.1859	-0.409163
1.59152	0.235107	0.0244474	0.00136784	11.431	2.93667	2.1406	0.12628	0.183135	-0.383847	-0.315228	13.6647	14.1647	-0.409796
1.59268	0.235254	0.0243975	0.00136451	11.4078	2.93638	2.14084	0.12628	0.182716	-0.361769	-0.315683	13.6441	14.1441	-0.410388
1.59384	0.235986	0.0243424	0.00135492	11.3847	2.93609	2.14108	0.631398	0.182322	-0.339853	-0.316118	13.6234	14.1234	-0.410953
1.595	0.235254	0.0242901	0.00134814	11.3619	2.9358	2.14132	-0.631398	0.181725	-0.514242	-0.316542	13.6029	14.1029	-0.411505
1.59616	0.235986	0.0242445	0.00134801	11.3396	2.9355	2.14156	0.631398	0.181495	-0.198484	-0.316877	13.5824	14.0824	-0.41194
1.59732	0.236572	0.0241954	0.0013463	11.3162	2.93521	2.1418	0.505119	0.181062	-0.373194	-0.317265	13.5611	14.0611	-0.412445
1.59848	0.236279	0.0241449	0.00134491	11.292	2.93491	2.14205	-0.252559	0.180483	-0.499034	-0.317628	13.539	14.039	-0.412917
1.59964	0.237158	0.0241002	0.00134908	11.2684	2.93462	2.14229	0.757678	0.180099	-0.330872	-0.31791	13.5169	14.0169	-0.413283
1.6008	0.236719	0.0240509	0.00134727	11.2449	2.93432	2.14253	-0.378839	0.179455	-0.555161	-0.318186	13.4949	13.9949	-0.413641
1.60196	0.236426	0.0240039	0.0013466	11.2221	2.93402	2.14278	-0.252559	0.179063	-0.33836	-0.318354	13.4731	13.9731	-0.413861
1.60312	0.237451	0.023963	0.00135122	11.2001	2.93372	2.14303	0.883957	0.178865	-0.17075	-0.318514	13.452	13.952	-0.414069
1.60428	0.237891	0.0239173	0.0013537	11.1767	2.93342	2.14327	0.378839	0.178349	-0.444556	-0.318741	13.4298	13.9298	-0.414363
1.60544	0.235254	0.0238706	0.00135596	11.1529	2.93312	2.14352	-2.27303	0.177743	-0.522413	-0.31891	13.4069	13.9069	-0.414584
1.6066	0.238184	0.0238288	0.00136241	11.1297	2.93282	2.14377	2.52559	0.178241	0.429291	-0.318989	13.3842	13.8842	-0.414685
1.60776	0.236572	0.0237822	0.00136288	11.1067	2.93252	2.14402	-1.38908	0.177682	-0.48225	-0.319404	13.3634	13.8634	-0.415225
1.60892	0.237451	0.0237363	0.00136341	11.0839	2.93221	2.14427	0.757678	0.177828	0.126166	-0.319745	13.3425	13.8425	-0.415669
1.61008	0.238184	0.0236965	0.0013684	11.0623	2.93191	2.14452	0.631398	0.177713	-0.0990069	-0.320288	13.3239	13.8239	-0.416375
1.61124	0.238623	0.0236515	0.00136989	11.0396	2.9316	2.14477	0.378839	0.177394	-0.275184	-0.32093	13.3048	13.8048	-0.41721
1.6124	0.239209	0.0236053	0.00137089	11.0165	2.9313	2.14502	0.505119	0.176984	-0.353412	-0.321593	13.2853	13.7853	-0.418071
1.61356	0.240088	0.0235629	0.00137719	10.9931	2.93099	2.14528	0.757678	0.176426	-0.480835	-0.322242	13.2655	13.7655	-0.418915
1.61472	0.242725	0.0235145	0.00137723	10.9694	2.93068	2.14553	2.27303	0.175606	-0.706551	-0.322819	13.2449	13.7449	-0.419665
1.61588	0.236572	0.0234614	0.00137212	10.9454	2.93037	2.14578	-5.30374	0.173842	-1.52104	-0.323223	13.2232	13.7232	-0.420191
1.61704	0.239355	0.023414	0.00137093	10.9227	2.93006	2.14604	2.39931	0.174545	0.606057	-0.323088	13.1997	13.6997	-0.420015
1.6182	0.240088	0.0233628	0.0013654	10.8998	2.92975	2.1463	0.631398	0.174246	-0.257881	-0.323372	13.1784	13.6784	-0.420383
1.61936	0.239502	0.0233074	0.0013583	10.8756	2.92944	2.14655	-0.505119	0.173741	-0.435405	-0.323684	13.1558	13.6558	-0.42079
1.62052	0.239941	0.0232548	0.0013551	10.8511	2.92913	2.14681	0.378839	0.173542	-0.171786	-0.323947	13.1328	13.6328	-0.421131
1.62168	0.240527	0.0232093	0.00135829	10.8275	2.92881	2.14707	0.505119	0.17325	-0.251508	-0.324278	13.111	13.611	-0.421561
1.62284	0.24082	0.0231596	0.00135604	10.804	2.9285	2.14733	0.252559	0.172809	-0.380383	-0.324642	13.0895	13.5895	-0.422034
1.624	0.240967	0.0231127	0.00135633	10.7809	2.92818	2.14759	0.12628	0.172331	-0.411351	-0.32498	13.0682	13.5682	-0.422474
1.62516	0.240381	0.0230722	0.00135558	10.7613	2.92786	2.14785	-0.505119	0.171875	-0.393468	-0.32528	13.0503	13.5503	-0.422864
1.62632	0.242578	0.0230266	0.00135214	10.7403	2.92755	2.14811	1.89419	0.171724	-0.130573	-0.325549	13.0308	13.5308	-0.423214
1.62748	0.241406	0.0229804	0.00135152	10.7179	2.92723	2.14837	-1.01024	0.170796	-0.799456	-0.325906	13.0104	13.5104	-0.423678
1.62864	0.24126	0.0229404	0.00135727	10.6959	2.92691	2.14863	-0.12628	0.170401	-0.340828	-0.326049	12.9892	13.4892	-0.423864
1.6298	0.241699	0.0228956	0.00135731	10.674	2.92659	2.1489	0.378839	0.170139	-0.22562	-0.326186	12.968	13.468	-0.424042
1.63096	0.241846	0.0228479	0.00135549	10.6513	2.92627	2.14916	0.12628	0.169783	-0.306662	-0.326369	12.9463	13.4463	-0.424279
1.63212	0.242285	0.0228059	0.00135841	10.6295	2.92595	2.14943	0.378839	0.169447	-0.28977	-0.32656	12.9255	13.4255	-0.424528
1.63328	0.242285	0.0227588	0.00135809	10.6065	2.92562	2.14969	0	0.169017	-0.371081	-0.326767	12.9037	13.4037	-0.424798
1.63444	0.241992	0.0227087	0.00135673	10.5825	2.9253	2.14996	-0.252559	0.168663	-0.305448	-0.326955	12.8808	13.3808	-0.425042
1.6356	0.242725	0.0226629	0.00136038	10.5585	2.92498	2.15023	0.631398	0.168498	-0.141876	-0.327152	12.8579	13.3579	-0.425298
1.63676	0.242725	0.0226162	0.00135997	10.5358	2.92465	2.15049	0	0.168125	-0.321633	-0.327433	12.8366	13.3366	-0.425663
1.63792	0.243164	0.0225666	0.0013555	10.5133	2.92432	2.15076	0.378839	0.167827	-0.256345	-0.327717	12.8157	13.3157	-0.426032
1.63908	0.243311	0.0225206	0.00135439	10.4912	2.924	2.15103	0.12628	0.167435	-0.338287	-0.328032	12.7954	13.2954	-0.426442
1.64024	0.243604	0.0224698	0.00134894	10.4685	2.92367	2.1513	0.252559	0.167061	-0.322304	-0.328343	12.7744	13.2744	-0.426846
1.6414	0.24375	0.0224153	0.0013419	10.4446	2.92334	2.15157	0.12628	0.166649	-0.355507	-0.328657	12.7523	13.2523	-0.427254
1.64256	0.244043	0.0223646	0.00134014	10.4205	2.92301	2.15184	0.252559	0.166255	-0.339829	-0.328959	12.7298	13.2298	-0.427646
1.64372	0.243896	0.0223211	0.00134613	10.3967	2.92268	2.15212	-0.12628	0.165822	-0.373344	-0.329255	12.7076	13.2076	-0.428032
1.64488	0.24375	0.0222749	0.00134833	10.3731	2.92235	2.15239	-0.12628	0.16552	-0.259914	-0.329532	12.6855	13.1855	-0.428392
1.64604	0.244189	0.022232	0.00135306	10.3501	2.92201	2.15266	0.378839	0.16535	-0.146599	-0.32984	12.6642	13.1642	-0.428793
1.6472	0.244775	0.022184	0.00135208	10.327	2.92168	2.15294	0.505119	0.165084	-0.229503	-0.330231	12.6433	13.1433	-0.429301
1.64836	0.244629	0.0221311	0.00134868	10.3024	2.92134	2.15321	-0.12628	0.164664	-0.361548	-0.330667	12.6211	13.1211	-0.429867
1.64952	0.244922	0.022082	0.00134974	10.2779	2.92101	2.15349	0.252559	0.164376	-0.248566	-0.33109	12.5989	13.0989	-0.430416
1.65068	0.245508	0.0220393	0.00135801	10.2535	2.92067	2.15377	0.505119	0.164048	-0.28281	-0.331549	12.577	13.077	-0.431014
1.65184	0.245361	0.0219924	0.00136167	10.229	2.92034	2.15404	-0.12628	0.163566	-0.415257	-0.33203	12.5552	13.0552	-0.431639
1.653	0.245508	0.0219431	0.00136401	10.2039	2.92	2.15432	0.12628	0.163215	-0.302703	-0.332474	12.5325	13.0325	-0.432216
1.65416	0.245654	0.0218891	0.00136037	10.1788	2.91966	2.1546	0.12628	0.162881	-0.288359	-0.332931	12.51	13.01	-0.432811
1.65532	0.246094	0.0218299	0.00135295	10.1529	2.91932	2.15488	0.378839	0.162563	-0.274147	-0.333409	12.4866	12.9866	-0.433431
1.65648	0.24624	0.0217721	0.00134861	10.1263	2.91898	2.15516	0.12628	0.162147	-0.358132	-0.333913	12.4628	12.9628	-0.434087
1.65764	0.246387	0.0217204	0.0013512	10.0999	2.91864	2.15544	0.12628	0.161748	-0.344203	-0.334406	12.4391	12.9391	-0.434728
1.6588	0.24668	0.0216695	0.0013511	10.0749	2.91829	2.15573	0.252559	0.161365	-0.330431	-0.334895	12.4169	12.9169	-0.435363
1.65996	0.246533	0.0216156	0.00134776	10.0499	2.91795	2.15601	-0.12628	0.16094	-0.365844	-0.335385	12.3945	12.8945	-0.436001
1.66112	0.246826	0.0215589	0.00133953	10.0255	2.91761	2.15629	0.252559	0.160645	-0.254309	-0.335862	12.3727	12.8727	-0.436621
1.66228	0.246973	0.0214978	0.00132696	10.0006	2.91726	2.15658	0.12628	0.160309	-0.290001	-0.336376	12.3507	12.8507	-0.437289
1.66344	0.247266	0.0214357	0.00131581	9.97479	2.91691	2.15686	0.252559	0.159988	-0.276787	-0.336911	12.3278	12.8278	-0.437984
1.6646	0.247119	0.0213791	0.00131047	9.94918	2.91657	2.15715	-0.12628	0.159625	-0.312734	-0.337473	12.3053	12.8053	-0.438714
1.66576	0.247705	0.0213313	0.0013137	9.92443	2.91622	2.15743	0.505119	0.159391	-0.20171	-0.338045	12.2837	12.7837	-0.439459
1.66692	0.247705	0.0212807	0.00131367	9.89959	2.91587	2.15772	0	0.159001	-0.335966	-0.33868	12.2623	12.7623	-0.440284
1.66808	0.247705	0.0212326	0.00131616	9.87496	2.91552	2.15801	0	0.158683	-0.274221	-0.339315	12.2412	12.7412	-0.44111
1.66924	0.247998	0.0211793	0.0013132	9.85006	2.91517	2.1583	0.252559	0.158437	-0.212601	-0.33998	12.22	12.72	-0.441974
1.6704	0.248145	0.0211217	0.00130835	9.82379	2.91482	2.15859	0.12628	0.158148	-0.249151	-0.340702	12.1977	12.6977	-0.442913
1.67156	0.248291	0.021068	0.00130794	9.7976	2.91447	2.15888	0.12628	0.157873	-0.236775	-0.341466	12.1757	12.6757	-0.443905
1.67272	0.248584	0.0210214	0.00131554	9.7716	2.91411	2.15917	0.252559	0.157612	-0.224507	-0.342276	12.1541	12.6541	-0.444959
1.67388	0.24873	0.020972	0.00131989	9.74558	2.91376	2.15946	0.12628	0.157309	-0.261378	-0.34314	12.1329	12.6329	-0.446082
1.67504	0.24873	0.0209203	0.00132153	9.71958	2.9134	2.15975	0	0.15702	-0.249328	-0.34404	12.1118	12.6118	-0.447252
1.6762	0.251221	0.0208631	0.00131744	9.69319	2.91305	2.16004	2.14675	0.156802	-0.188353	-0.344983	12.0906	12.5906	-0.448479
1.67736	0.249609	0.0208036	0.00131313	9.66578	2.91269	2.16034	-1.38908	0.155687	-0.961106	-0.345997	12.0688	12.5688	-0.449796
1.67852	0.249756	0.020749	0.0013138	9.63868	2.91233	2.16063	0.12628	0.155268	-0.361232	-0.346734	12.0457	12.5457	-0.450754
1.67968	0.248877	0.0207021	0.00132249	9.61211	2.91198	2.16093	-0.757678	0.154862	-0.349975	-0.347464	12.0232	12.5232	-0.451703
1.68084	0.249756	0.0206532	0.00132765	9.58596	2.91162	2.16122	0.757678	0.154867	0.00438966	-0.348193	12.001	12.501	-0.452651
1.682	0.249756	0.0206021	0.00133039	9.55978	2.91126	2.16152	0	0.1546	-0.229699	-0.349081	11.9797	12.4797	-0.453805
1.68316	0.251221	0.0205447	0.00132658	9.53322	2.9109	2.16181	1.2628	0.154403	-0.169664	-0.350022	11.9583	12.4583	-0.455029
1.68432	0.250049	0.0204817	0.00131842	9.50563	2.91053	2.16211	-1.01024	0.153707	-0.600083	-0.351045	11.9364	12.4364	-0.456359
1.68548	0.24917	0.0204216	0.00131387	9.47804	2.91017	2.16241	-0.757678	0.153536	-0.148091	-0.351956	11.9138	12.4138	-0.457542
1.68664	0.250049	0.0203695	0.00131624	9.4515	2.90981	2.16271	0.757678	0.153774	0.205758	-0.352958	11.8928	12.3928	-0.458846
1.6878	0.250928	0.0203273	0.00132828	9.42581	2.90944	2.16301	0.757678	0.153741	-0.0287543	-0.354212	11.874	12.374	-0.460476
1.68896	0.250342	0.0202819	0.00133734	9.39983	2.90908	2.16331	-0.505119	0.153436	-0.26328	-0.355613	11.8557	12.3557	-0.462297
1.69012	0.250342	0.0202299	0.00133904	9.37361	2.90871	2.16361	0	0.153427	-0.00754483	-0.357055	11.8374	12.3374	-0.464172
1.69128	0.251221	0.0201728	0.00133583	9.34692	2.90834	2.16391	0.757678	0.153487	0.0520345	-0.358655	11.8195	12.3195	-0.466252
1.69244	0.251514	0.0201161	0.00133488	9.31951	2.90798	2.16422	0.252559	0.153275	-0.182589	-0.36044	11.8019	12.3019	-0.468572
1.6936	0.251367	0.0200656	0.00134086	9.29226	2.90761	2.16452	-0.12628	0.153019	-0.221144	-0.362305	11.7849	12.2849	-0.470996
1.69476	0.2521	0.0200248	0.00135651	9.2658	2.90724	2.16483	0.631398	0.152888	-0.112684	-0.364233	11.7691	12.2691	-0.473503
1.69592	0.252832	0.0199808	0.00136947	9.23886	2.90687	2.16513	0.631398	0.152542	-0.298503	-0.366275	11.7534	12.2534	-0.476157
1.69708	0.251074	0.0199239	0.0013726	9.20966	2.90649	2.16544	-1.51536	0.15198	-0.484456	-0.368347	11.7356	12.2356	-0.478851
1.69824	0.251953	0.0198613	0.00137031	9.17987	2.90612	2.16574	0.757678	0.152169	0.163016	-0.370367	11.7169	12.2169	-0.481477
1.6994	0.252393	0.0197986	0.00136863	9.14983	2.90575	2.16605	0.378839	0.152085	-0.0721198	-0.372628	11.6993	12.1993	-0.484416
1.70056	0.252686	0.0197406	0.00137224	9.11989	2.90538	2.16636	0.252559	0.151899	-0.160175	-0.375023	11.6825	12.1825	-0.48753
1.70172	0.252979	0.0196911	0.00138472	9.09044	2.905	2.16667	0.252559	0.151668	-0.199263	-0.377516	11.6668	12.1668	-0.49077
1.70288	0.252979	0.0196432	0.00139645	9.06208	2.90462	2.16698	0	0.151392	-0.238442	-0.380088	11.6526	12.1526	-0.494115
1.70404	0.253125	0.0195833	0.00139588	9.03294	2.90425	2.16729	0.12628	0.151183	-0.179653	-0.382725	11.6379	12.1379	-0.497542
1.7052	0.252979	0.0195158	0.00138853	9.00289	2.90387	2.1676	-0.12628	0.150986	-0.169981	-0.385453	11.6229	12.1229	-0.501089
1.70636	0.253564	0.0194474	0.00138069	8.97255	2.90349	2.16791	0.505119	0.150914	-0.0623121	-0.388278	11.6081	12.1081	-0.504761
1.70752	0.254883	0.0193821	0.00137706	8.94201	2.90311	2.16822	1.13652	0.150682	-0.199859	-0.39125	11.5939	12.0939	-0.508625
1.70868	0.254883	0.0193043	0.00136057	8.91059	2.90273	2.16853	0	0.150006	-0.582685	-0.394308	11.5793	12.0793	-0.5126
1.70984	0.255029	0.0192195	0.001337	8.87873	2.90235	2.16885	0.12628	0.149398	-0.524434	-0.397281	11.5638	12.0638	-0.516466
1.711	0.252979	0.0191345	0.00131348	8.8467	2.90197	2.16916	-1.76791	0.1488	-0.515456	-0.400197	11.5478	12.0478	-0.520256
1.71216	0.255469	0.0190541	0.00129495	8.81489	2.90159	2.16948	2.14675	0.149065	0.228855	-0.403061	11.5317	12.0317	-0.52398
1.71332	0.255176	0.0189829	0.00128553	8.78386	2.9012	2.16979	-0.252559	0.148431	-0.546901	-0.40621	11.518	12.018	-0.528073
1.71448	0.256201	0.0189031	0.00126817	8.75187	2.90082	2.17011	0.883957	0.147977	-0.391185	-0.409295	11.503	12.003	-0.532084
1.71564	0.256201	0.0188215	0.00124945	8.71954	2.90043	2.17042	0	0.147192	-0.676987	-0.412389	11.4877	11.9877	-0.536105
1.7168	0.256787	0.0187425	0.00123322	8.68745	2.90005	2.17074	0.505119	0.146473	-0.619828	-0.415363	11.4719	11.9719	-0.539972
1.71796	0.25459	0.0186709	0.00122442	8.65596	2.89966	2.17106	-1.89419	0.145592	-0.7591	-0.418245	11.4563	11.9563	-0.543719
1.71912	0.25708	0.0186101	0.00122634	8.62531	2.89927	2.17138	2.14675	0.145631	0.0330043	-0.420974	11.4407	11.9407	-0.547266
1.72028	0.254004	0.0185426	0.00121782	8.59573	2.89888	2.1717	-2.65187	0.144767	-0.744085	-0.423907	11.4272	11.9272	-0.551079
1.72144	0.256787	0.0184622	0.0011961	8.56522	2.8985	2.17202	2.39931	0.145164	0.341925	-0.426696	11.412	11.912	-0.554705
1.7226	0.256934	0.0183776	0.00117108	8.53401	2.89811	2.17234	0.12628	0.144545	-0.533422	-0.429831	11.3981	11.8981	-0.558781
1.72376	0.257373	0.0182945	0.0011474	8.50299	2.89771	2.17266	0.378839	0.143935	-0.526329	-0.43292	11.384	11.884	-0.562796
1.72492	0.25459	0.0182175	0.00112892	8.47286	2.89732	2.17299	-2.39931	0.143218	-0.617548	-0.435966	11.3707	11.8707	-0.566756
1.72608	0.257959	0.0181522	0.00112056	8.44426	2.89693	2.17331	2.90443	0.143647	0.369785	-0.438931	11.3584	11.8584	-0.57061
1.72724	0.257373	0.0180988	0.00112399	8.41664	2.89654	2.17363	-0.505119	0.142833	-0.702302	-0.44226	11.3491	11.8491	-0.574938
1.7284	0.257812	0.0180322	0.001115	8.38767	2.89614	2.17396	0.378839	0.14231	-0.450684	-0.445472	11.3378	11.8378	-0.579113
1.72956	0.254883	0.0179576	0.00109827	8.35798	2.89575	2.17428	-2.52559	0.141681	-0.542536	-0.448681	11.3257	11.8257	-0.583285
1.73072	0.257666	0.0178836	0.00108203	8.32834	2.89535	2.17461	2.39931	0.142253	0.49324	-0.451848	11.3135	11.8135	-0.587403
1.73188	0.258398	0.017815	0.00107012	8.29958	2.89495	2.17494	0.631398	0.141808	-0.383239	-0.455441	11.3045	11.8045	-0.592073
1.73304	0.257959	0.0177553	0.00106722	8.27151	2.89455	2.17526	-0.378839	0.141143	-0.573359	-0.459066	11.2964	11.7964	-0.596786
1.7342	0.258105	0.0177071	0.00107553	8.24443	2.89416	2.17559	0.12628	0.140712	-0.371437	-0.46264	11.2889	11.7889	-0.601432
1.73536	0.259131	0.0176464	0.0010714	8.21633	2.89376	2.17592	0.883957	0.140288	-0.365832	-0.466255	11.2807	11.7807	-0.606132
1.73652	0.25459	0.0175725	0.00105675	8.18614	2.89336	2.17625	-3.91467	0.139528	-0.65462	-0.469916	11.2707	11.7707	-0.61089
1.73768	0.260596	0.0174985	0.00104066	8.15644	2.89295	2.17658	5.17746	0.140595	0.919736	-0.473493	11.2606	11.7606	-0.61554
1.73884	0.259131	0.0174272	0.00102861	8.12644	2.89255	2.17691	-1.2628	0.139393	-1.03622	-0.477697	11.2538	11.7538	-0.621006
1.74	0.258984	0.0173642	0.001025	8.09702	2.89215	2.17724	-0.12628	0.138823	-0.491709	-0.48165	11.2461	11.7461	-0.626145
1.74116	0.259131	0.0173119	0.00103202	8.06846	2.89175	2.17758	0.12628	0.138372	-0.388763	-0.485599	11.2392	11.7392	-0.631278
1.74232	0.259131	0.0172494	0.00102741	8.03967	2.89134	2.17791	0	0.137926	-0.384067	-0.489591	11.2324	11.7324	-0.636468
1.74348	0.258105	0.0171741	0.00100979	8.01001	2.89094	2.17824	-0.883957	0.137543	-0.330506	-0.493631	11.225	11.725	-0.64172
1.74464	0.262646	0.0170968	0.000988777	7.98074	2.89053	2.17858	3.91467	0.13762	0.0661698	-0.497744	11.2183	11.7183	-0.647067
1.7458	0.254736	0.0170202	0.00096986	7.95094	2.89012	2.17891	-6.8191	0.135995	-1.40056	-0.502111	11.2126	11.7126	-0.652744
1.74696	0.258105	0.0169516	0.000958253	7.92209	2.88972	2.17925	2.90443	0.137504	1.30029	-0.506073	11.2055	11.7055	-0.657895
1.74812	0.260889	0.0168944	0.000957527	7.89432	2.88931	2.17958	2.39931	0.137766	0.225819	-0.51085	11.204	11.704	-0.664104
1.74928	0.260596	0.0168372	0.000956957	7.8665	2.8889	2.17992	-0.252559	0.137009	-0.652402	-0.515957	11.2043	11.7043	-0.670745
1.75044	0.259277	0.0167671	0.000943621	7.8376	2.88849	2.18026	-1.13652	0.136427	-0.501122	-0.521004	11.2031	11.7031	-0.677305
1.7516	0.263818	0.0166937	0.000927412	7.80827	2.88808	2.1806	3.91467	0.13642	-0.00680259	-0.526059	11.2016	11.7016	-0.683877
1.75276	0.263232	0.0166293	0.000920694	7.77944	2.88766	2.18094	-0.505119	0.13471	-1.474	-0.531349	11.2019	11.7019	-0.690754
1.75392	0.263086	0.0165704	0.00091604	7.75242	2.88725	2.18128	-0.12628	0.133288	-1.22554	-0.536214	11.2016	11.7016	-0.697078
1.75508	0.262793	0.0165121	0.000912075	7.72548	2.88684	2.18162	-0.252559	0.131983	-1.12474	-0.540768	11.1997	11.6997	-0.702998
1.75624	0.263232	0.0164446	0.000898623	7.69792	2.88642	2.18196	0.378839	0.130852	-0.975412	-0.545059	11.1957	11.6957	-0.708577
1.7574	0.263525	0.0163762	0.000883377	7.67061	2.88601	2.1823	0.252559	0.129609	-1.07171	-0.549156	11.191	11.691	-0.713903
1.75856	0.263672	0.0163106	0.000871004	7.64351	2.88559	2.18264	0.12628	0.12831	-1.11946	-0.553018	11.1851	11.6851	-0.718924
1.75972	0.263672	0.0162527	0.000866172	7.6171	2.88517	2.18298	0	0.127012	-1.11867	-0.556625	11.1785	11.6785	-0.723613
1.76088	0.263672	0.0162058	0.000868604	7.59311	2.88476	2.18333	0	0.125772	-1.06935	-0.559979	11.173	11.673	-0.727972
1.76204	0.263818	0.0161595	0.000870878	7.56945	2.88434	2.18367	0.12628	0.124588	-1.02051	-0.563103	11.1665	11.6665	-0.732034
1.7632	0.263965	0.0161005	0.000861447	7.5444	2.88392	2.18402	0.12628	0.123404	-1.02116	-0.566021	11.1575	11.6575	-0.735827
1.76436	0.264111	0.0160357	0.000847731	7.51826	2.8835	2.18436	0.12628	0.122218	-1.02228	-0.568734	11.1463	11.6463	-0.739354
1.76552	0.264258	0.0159731	0.000835497	7.49256	2.88308	2.18471	0.12628	0.12103	-1.02386	-0.571243	11.1344	11.6344	-0.742616
1.76668	0.264404	0.0159172	0.000829964	7.46741	2.88266	2.18506	0.12628	0.11984	-1.02589	-0.573548	11.1219	11.6219	-0.745612
1.76784	0.264404	0.0158716	0.000834702	7.4431	2.88223	2.1854	0	0.118647	-1.0284	-0.575649	11.1092	11.6092	-0.748344
1.769	0.264551	0.0158267	0.000839817	7.41896	2.88181	2.18575	0.12628	0.117508	-0.982322	-0.577546	11.0955	11.5955	-0.75081
1.77016	0.264551	0.0157695	0.000832113	7.39408	2.88139	2.1861	0	0.116364	-0.985728	-0.579261	11.08	11.58	-0.753039
1.77132	0.264844	0.0157047	0.000816537	7.36871	2.88096	2.18645	0.252559	0.115273	-0.940541	-0.580793	11.0631	11.5631	-0.755031
1.77248	0.263086	0.0156414	0.000801879	7.34367	2.88053	2.1868	-1.51536	0.11412	-0.993852	-0.582162	11.0456	11.5456	-0.756811
1.77364	0.264844	0.0155838	0.000793356	7.31893	2.88011	2.18715	1.51536	0.113702	-0.361083	-0.583347	11.0273	11.5273	-0.758351
1.7748	0.26499	0.0155353	0.000793714	7.29499	2.87968	2.18751	0.12628	0.112651	-0.905383	-0.584631	11.0105	11.5105	-0.76002
1.77596	0.265137	0.0154868	0.00079388	7.27112	2.87925	2.18786	0.12628	0.111595	-0.910676	-0.585771	10.9929	11.4929	-0.761502
1.77712	0.265137	0.0154393	0.000794404	7.24761	2.87882	2.18821	0	0.110532	-0.916378	-0.586765	10.9748	11.4748	-0.762794
1.77828	0.26543	0.0153838	0.000786764	7.22353	2.87839	2.18857	0.252559	0.109519	-0.873455	-0.58761	10.9554	11.4554	-0.763893
1.77944	0.265283	0.0153279	0.000778378	7.19956	2.87796	2.18892	-0.12628	0.108441	-0.929002	-0.588326	10.9354	11.4354	-0.764824
1.7806	0.265576	0.0152769	0.000774193	7.17624	2.87753	2.18927	0.252559	0.107469	-0.837853	-0.588889	10.9151	11.4151	-0.765555
1.78176	0.265723	0.0152342	0.00077833	7.1536	2.8771	2.18963	0.12628	0.106432	-0.894196	-0.589339	10.895	11.395	-0.766141
1.78292	0.265576	0.0151908	0.000781719	7.13093	2.87667	2.18999	-0.12628	0.105386	-0.901903	-0.589653	10.874	11.374	-0.766549
1.78408	0.265723	0.0151484	0.000785734	7.10844	2.87623	2.19034	0.12628	0.104444	-0.811941	-0.589826	10.8525	11.3525	-0.766773
1.78524	0.265869	0.0150986	0.000781857	7.0856	2.8758	2.1907	0.12628	0.103492	-0.820421	-0.589898	10.83	11.33	-0.766868
1.7864	0.266309	0.0150477	0.000776682	7.06278	2.87536	2.19106	0.378839	0.10253	-0.82927	-0.589867	10.8071	11.3071	-0.766827
1.78756	0.266016	0.0150004	0.000775431	7.04012	2.87493	2.19142	-0.252559	0.101444	-0.936568	-0.589728	10.7836	11.2836	-0.766646
1.78872	0.266602	0.0149615	0.000782229	7.01819	2.87449	2.19178	0.505119	0.100517	-0.799099	-0.589433	10.7601	11.2601	-0.766263
1.78988	0.266748	0.0149216	0.000788005	6.99627	2.87405	2.19214	0.12628	0.0994076	-0.956216	-0.589043	10.736	11.236	-0.765756
1.79104	0.266162	0.0148821	0.000793861	6.97444	2.87361	2.1925	-0.505119	0.0982863	-0.966652	-0.588488	10.7111	11.2111	-0.765034
1.7922	0.265869	0.0148347	0.000791827	6.95206	2.87317	2.19286	-0.252559	0.0974368	-0.732334	-0.587762	10.6848	11.1848	-0.764091
1.79336	0.266748	0.0147818	0.000783277	6.92963	2.87273	2.19322	0.757678	0.0967449	-0.596421	-0.586972	10.658	11.158	-0.763063
1.79452	0.266455	0.0147316	0.000777279	6.90746	2.87229	2.19359	-0.252559	0.0957553	-0.853078	-0.586177	10.6314	11.1314	-0.76203
1.79568	0.266895	0.0146879	0.000777406	6.88595	2.87185	2.19395	0.378839	0.0949227	-0.717819	-0.585262	10.6049	11.1049	-0.760841
1.79684	0.267188	0.014644	0.000776509	6.86479	2.87141	2.19432	0.252559	0.0939621	-0.828071	-0.584287	10.5784	11.0784	-0.759573
1.798	0.266748	0.0146	0.000775962	6.84342	2.87096	2.19468	-0.378839	0.0929301	-0.889659	-0.583203	10.551	11.051	-0.758163
1.79916	0.267334	0.0145605	0.000773016	6.82525	2.87052	2.19505	0.505119	0.0921106	-0.706458	-0.58198	10.5261	11.0261	-0.756574
1.80032	0.267041	0.014515	0.000763819	6.80672	2.87007	2.19541	-0.252559	0.0911051	-0.866841	-0.580701	10.5006	11.0006	-0.754912
1.80148	0.267773	0.0144718	0.000756617	6.78848	2.86963	2.19578	0.631398	0.0902543	-0.733386	-0.579294	10.4746	10.9746	-0.753082
1.80264	0.267041	0.0144338	0.00075498	6.77054	2.86918	2.19615	-0.631398	0.0891599	-0.943527	-0.577817	10.4485	10.9485	-0.751162
1.8038	0.266895	0.0143967	0.000751759	6.75366	2.86873	2.19651	-0.12628	0.0883899	-0.663714	-0.576175	10.4226	10.9226	-0.749027
1.80496	0.263379	0.0143596	0.000748327	6.73688	2.86829	2.19688	-3.03071	0.0877167	-0.580353	-0.574494	10.3966	10.8966	-0.746842
1.80612	0.267334	0.0143267	0.000748807	6.72051	2.86784	2.19725	3.40955	0.0884483	0.630618	-0.57281	10.371	10.871	-0.744653
1.80728	0.268799	0.0142865	0.000741927	6.70365	2.86739	2.19762	1.2628	0.0876837	-0.659056	-0.571668	10.3478	10.8478	-0.743169
1.80844	0.266309	0.0142469	0.000735381	6.68691	2.86694	2.19799	-2.14675	0.0863899	-1.11538	-0.570487	10.3246	10.8246	-0.741633
1.8096	0.267627	0.0142125	0.000733565	6.67076	2.86649	2.19837	1.13652	0.086102	-0.248194	-0.569061	10.3006	10.8006	-0.739779
1.81076	0.268066	0.0141859	0.000739504	6.65528	2.86603	2.19874	0.378839	0.0853409	-0.656098	-0.567779	10.2781	10.7781	-0.738112
1.81192	0.267627	0.0141582	0.000744127	6.63977	2.86558	2.19911	-0.378839	0.0844476	-0.770072	-0.566457	10.2553	10.7553	-0.736394
1.81308	0.26792	0.014132	0.000751835	6.62375	2.86513	2.19948	0.252559	0.083763	-0.590165	-0.565043	10.2315	10.7315	-0.734556
1.81424	0.267334	0.0140983	0.000752184	6.60706	2.86467	2.19986	-0.505119	0.0830024	-0.655714	-0.563618	10.207	10.707	-0.732704
1.8154	0.268359	0.0140595	0.000746548	6.59036	2.86422	2.20023	0.883957	0.0825067	-0.427329	-0.562152	10.1822	10.6822	-0.730798
1.81656	0.268213	0.0140247	0.000744823	6.574	2.86376	2.20061	-0.12628	0.08165	-0.738555	-0.560747	10.1581	10.6581	-0.72897
1.81772	0.268359	0.0139977	0.000750583	6.55838	2.86331	2.20098	0.12628	0.0808869	-0.65781	-0.559261	10.1343	10.6343	-0.727039
1.81888	0.268506	0.0139689	0.000754482	6.54265	2.86285	2.20136	0.12628	0.0801034	-0.675437	-0.557731	10.1102	10.6102	-0.72505
1.82004	0.268799	0.0139396	0.000758171	6.52677	2.86239	2.20174	0.252559	0.0792991	-0.693369	-0.556148	10.0856	10.5856	-0.722992
1.8212	0.268945	0.0139075	0.000756153	6.51181	2.86193	2.20211	0.12628	0.0784168	-0.760651	-0.554503	10.0616	10.5616	-0.720854
1.82236	0.269531	0.0138695	0.000748703	6.49628	2.86147	2.20249	0.505119	0.0775128	-0.779237	-0.552765	10.0365	10.5365	-0.718595
1.82352	0.269971	0.0138339	0.00074379	6.48081	2.86101	2.20287	0.378839	0.0764163	-0.945288	-0.550925	10.0109	10.5109	-0.716203
1.82468	0.26748	0.0138046	0.000745261	6.46583	2.86055	2.20325	-2.14675	0.0751836	-1.06273	-0.548908	9.98482	10.4848	-0.71358
1.82584	0.268066	0.0137737	0.000743769	6.45127	2.86009	2.20363	0.505119	0.0749517	-0.199888	-0.546659	9.95789	10.4579	-0.710657
1.827	0.266602	0.0137422	0.000741238	6.43687	2.85962	2.20401	-1.2628	0.074526	-0.366934	-0.544566	9.93198	10.432	-0.707936
1.82816	0.268945	0.0137159	0.00074399	6.42285	2.85916	2.20439	2.02047	0.0747028	0.152385	-0.542554	9.90689	10.4069	-0.70532
1.82932	0.269092	0.0136844	0.000741029	6.40861	2.8587	2.20478	0.12628	0.0740031	-0.603211	-0.540854	9.88331	10.3833	-0.70311
1.83048	0.269385	0.0136537	0.000739227	6.39429	2.85823	2.20516	0.252559	0.0732798	-0.623511	-0.539126	9.85948	10.3595	-0.700864
1.83164	0.27085	0.0136279	0.000742157	6.38042	2.85777	2.20554	1.2628	0.0724758	-0.69313	-0.537361	9.8359	10.3359	-0.698569
1.8328	0.271436	0.0135993	0.000741848	6.3665	2.8573	2.20593	0.505119	0.0711356	-1.15536	-0.535525	9.81189	10.3119	-0.696182
1.83396	0.273779	0.0135689	0.000740774	6.35206	2.85683	2.20631	2.02047	0.0695998	-1.32389	-0.53341	9.78581	10.2858	-0.693432
1.83512	0.264551	0.0135423	0.000744433	6.33751	2.85636	2.2067	-7.95562	0.0671853	-2.08147	-0.530938	9.75767	10.2577	-0.69022
1.83628	0.266602	0.0135093	0.00074183	6.32239	2.85589	2.20708	1.76791	0.0683848	1.034	-0.527769	9.72512	10.2251	-0.686099
1.83744	0.269531	0.0134727	0.000734887	6.30725	2.85543	2.20747	2.52559	0.0688187	0.374029	-0.525303	9.69642	10.1964	-0.682893
1.8386	0.270557	0.0134408	0.000732124	6.29275	2.85495	2.20786	0.883957	0.0681458	-0.580003	-0.523242	9.67058	10.1706	-0.680214
1.83976	0.269385	0.0134055	0.000725293	6.27824	2.85448	2.20824	-1.01024	0.0671056	-0.896805	-0.521155	9.64459	10.1446	-0.677502
1.84092	0.269531	0.0133686	0.000716589	6.26375	2.85401	2.20863	0.12628	0.0665506	-0.478443	-0.518899	9.6177	10.1177	-0.674569
1.84208	0.268652	0.0133363	0.000712058	6.24975	2.85354	2.20902	-0.757678	0.0659687	-0.501637	-0.516662	9.59138	10.0914	-0.67166
1.84324	0.269531	0.0133109	0.000711972	6.23732	2.85307	2.20941	0.757678	0.0657578	-0.181794	-0.514431	9.56669	10.0667	-0.66876
1.8444	0.267334	0.0132809	0.000706984	6.22466	2.85259	2.2098	-1.89419	0.0652352	-0.450484	-0.51235	9.54259	10.0426	-0.666055
1.84556	0.270117	0.013254	0.000705063	6.21225	2.85212	2.21019	2.39931	0.0655953	0.310416	-0.510297	9.51888	10.0189	-0.663386
1.84672	0.27041	0.0132301	0.000702086	6.20178	2.85164	2.21058	0.252559	0.0649041	-0.595831	-0.508614	9.49916	9.99916	-0.661198
1.84788	0.271143	0.013203	0.000696402	6.19083	2.85116	2.21098	0.631398	0.0641284	-0.668703	-0.506891	9.47873	9.97873	-0.658958
1.84904	0.270264	0.0131782	0.000694055	6.17959	2.85069	2.21137	-0.757678	0.0630972	-0.888988	-0.505095	9.45761	9.95761	-0.656624
1.8502	0.270117	0.0131602	0.000698346	6.16899	2.85021	2.21176	-0.12628	0.0624357	-0.570259	-0.503127	9.43619	9.93619	-0.654065
1.85136	0.271582	0.0131372	0.000697453	6.15811	2.84973	2.21216	1.2628	0.0618592	-0.496977	-0.501128	9.41431	9.91431	-0.651466
1.85252	0.271436	0.0131151	0.000698249	6.14693	2.84925	2.21255	-0.12628	0.0607418	-0.963333	-0.499131	9.39215	9.89215	-0.648871
1.85368	0.266162	0.0130979	0.000704309	6.136	2.84877	2.21295	-4.54607	0.0597085	-0.890707	-0.496925	9.36909	9.86909	-0.646003
1.85484	0.274072	0.0130785	0.000706837	6.12544	2.84829	2.21334	6.8191	0.06075	0.897841	-0.494542	9.34542	9.84542	-0.642904
1.856	0.270264	0.0130577	0.000710784	6.1136	2.84781	2.21374	-3.28327	0.0587472	-1.72661	-0.492786	9.32392	9.82392	-0.640621
1.85716	0.268213	0.0130432	0.000720826	6.10233	2.84733	2.21413	-1.76791	0.0582497	-0.428815	-0.490474	9.29994	9.79994	-0.637616
1.85832	0.272168	0.0130245	0.000725969	6.09104	2.84684	2.21453	3.40955	0.0585749	0.280335	-0.48819	9.27608	9.77608	-0.634647
1.85948	0.271289	0.0130021	0.000727315	6.07952	2.84636	2.21493	-0.757678	0.0573906	-1.02094	-0.486252	9.25391	9.75391	-0.632127
1.86064	0.270703	0.0129839	0.000733113	6.06817	2.84588	2.21533	-0.505119	0.0565735	-0.704427	-0.484073	9.23057	9.73057	-0.629295
1.8618	0.27085	0.0129617	0.000734843	6.05656	2.84539	2.21573	0.12628	0.0560094	-0.486306	-0.481795	9.20643	9.70643	-0.626333
1.86296	0.271582	0.0129377	0.00073498	6.04476	2.8449	2.21613	0.631398	0.0554136	-0.513594	-0.479515	9.18209	9.68209	-0.623369
1.86412	0.270703	0.0129192	0.000740122	6.03355	2.84442	2.21653	-0.757678	0.0545584	-0.737264	-0.477219	9.15826	9.65826	-0.620385
1.86528	0.271143	0.0129014	0.000742574	6.0238	2.84393	2.21693	0.378839	0.054069	-0.421851	-0.474807	9.13524	9.63524	-0.617249
1.86644	0.271436	0.0128804	0.000742061	6.01373	2.84344	2.21733	0.252559	0.0534334	-0.547968	-0.472418	9.11203	9.61203	-0.614143
1.8676	0.270557	0.0128624	0.000745183	6.00359	2.84295	2.21773	-0.757678	0.0527081	-0.625294	-0.469995	9.08857	9.58857	-0.610994
1.86876	0.272461	0.0128387	0.000743142	5.99282	2.84246	2.21814	1.64164	0.0523478	-0.310599	-0.467502	9.06408	9.56408	-0.607753
1.86992	0.270996	0.0128127	0.000738961	5.98178	2.84197	2.21854	-1.2628	0.0512716	-0.927763	-0.46508	9.03972	9.53972	-0.604604
1.87108	0.271289	0.0127918	0.000739788	5.97117	2.84148	2.21895	0.252559	0.0507873	-0.417474	-0.46245	9.01464	9.51464	-0.601185
1.87224	0.271582	0.0127784	0.000748097	5.96117	2.84099	2.21935	0.252559	0.0502121	-0.495828	-0.45984	8.99028	9.49028	-0.597791
1.8734	0.272168	0.0127612	0.000752619	5.95089	2.8405	2.21976	0.505119	0.0495458	-0.574405	-0.457213	8.96556	9.46556	-0.594377
1.87456	0.266309	0.0127461	0.000758856	5.9409	2.84	2.22016	-5.05119	0.0486743	-0.751316	-0.454534	8.94084	9.44084	-0.590894
1.87572	0.271875	0.0127253	0.000758836	5.9307	2.83951	2.22057	4.79863	0.0501	1.2291	-0.451721	8.91517	9.41517	-0.587237
1.87688	0.268652	0.0127002	0.000755309	5.91983	2.83902	2.22098	-2.77815	0.0493868	-0.614884	-0.449665	8.89299	9.39299	-0.584565
1.87804	0.272754	0.012679	0.000755972	5.90916	2.83852	2.22138	3.53583	0.0499472	0.483127	-0.447535	8.8706	9.3706	-0.581796
1.8792	0.271582	0.0126653	0.000764125	5.89908	2.83802	2.22179	-1.01024	0.0489374	-0.870537	-0.445824	8.85111	9.35111	-0.579571
1.88036	0.271582	0.0126475	0.000768223	5.88867	2.83753	2.2222	0	0.0484047	-0.45923	-0.443922	8.83024	9.33024	-0.577098
1.88152	0.271729	0.0126273	0.000769643	5.87817	2.83703	2.22261	0.12628	0.0478938	-0.440434	-0.442013	8.80924	9.30924	-0.574616
1.88268	0.272314	0.0126011	0.000764812	5.8673	2.83653	2.22302	0.505119	0.0473476	-0.470872	-0.440104	8.78787	9.28787	-0.572135
1.88384	0.27085	0.0125702	0.000755652	5.85593	2.83603	2.22343	-1.2628	0.0465951	-0.648638	-0.438182	8.76593	9.26593	-0.569636
1.885	0.271875	0.0125418	0.000748207	5.84508	2.83553	2.22384	0.883957	0.0464326	-0.140165	-0.436165	8.74399	9.24399	-0.567014
1.88616	0.272314	0.0125206	0.000747424	5.83499	2.83503	2.22425	0.378839	0.0458927	-0.465399	-0.434281	8.72354	9.22354	-0.564565
1.88732	0.27334	0.012503	0.000746152	5.82685	2.83453	2.22467	0.883957	0.0452029	-0.594691	-0.432383	8.70496	9.20496	-0.562098
1.88848	0.272168	0.0124823	0.000741918	5.81844	2.83403	2.22508	-1.01024	0.0441352	-0.920402	-0.430412	8.68571	9.18571	-0.559536
1.88964	0.272168	0.0124561	0.000731146	5.81002	2.83353	2.22549	0	0.0435425	-0.510961	-0.428221	8.66523	9.16523	-0.556687
1.8908	0.274072	0.0124248	0.000715479	5.80116	2.83302	2.22591	1.64164	0.0429694	-0.494052	-0.425992	8.64412	9.14412	-0.553789
1.89196	0.272461	0.012395	0.000701235	5.79237	2.83252	2.22632	-1.38908	0.0416761	-1.11486	-0.423732	8.62289	9.12289	-0.550852
1.89312	0.272461	0.0123705	0.00069253	5.78396	2.83201	2.22674	0	0.0410274	-0.559258	-0.421161	8.60034	9.10034	-0.54751
1.89428	0.271436	0.0123553	0.000692937	5.77634	2.83151	2.22715	-0.883957	0.0403971	-0.543326	-0.418528	8.57825	9.07825	-0.544086
1.89544	0.272314	0.0123376	0.000690631	5.76859	2.831	2.22757	0.757678	0.0401833	-0.184373	-0.415839	8.55571	9.05571	-0.54059
1.8966	0.272168	0.0123206	0.000686163	5.76209	2.8305	2.22799	-0.12628	0.0396462	-0.462997	-0.413254	8.53499	9.03499	-0.53723
1.89776	0.272168	0.0122974	0.00067568	5.75505	2.82999	2.2284	-4.78544e-14	0.0391839	-0.398562	-0.410646	8.51361	9.01361	-0.53384
1.89892	0.271729	0.0122734	0.000664953	5.74766	2.82948	2.22882	-0.378839	0.0387392	-0.383347	-0.408044	8.4919	8.9919	-0.530457
1.90008	0.272607	0.0122541	0.000658924	5.74069	2.82897	2.22924	0.757678	0.0384826	-0.22119	-0.405453	8.47069	8.97069	-0.527089
1.90124	0.272461	0.012243	0.000660891	5.73442	2.82846	2.22966	-0.12628	0.037902	-0.500472	-0.402945	8.45062	8.95062	-0.523829
1.9024	0.273633	0.0122298	0.000659857	5.72837	2.82795	2.23008	1.01024	0.0373955	-0.436716	-0.400394	8.43054	8.93054	-0.520512
1.90356	0.272168	0.0122145	0.000657471	5.72187	2.82744	2.2305	-1.2628	0.0364506	-0.814497	-0.397825	8.40991	8.90991	-0.517173
1.90472	0.272168	0.0121922	0.000647958	5.71486	2.82693	2.23092	0	0.0360911	-0.309965	-0.39507	8.38774	8.88774	-0.51359
1.90588	0.27334	0.0121651	0.000633239	5.70762	2.82642	2.23135	1.01024	0.0357478	-0.295949	-0.392352	8.36556	8.86556	-0.510058
1.90704	0.270703	0.012142	0.00062293	5.70051	2.8259	2.23177	-2.27303	0.0349655	-0.67437	-0.389678	8.34374	8.84374	-0.506581
1.9082	0.2729	0.0121263	0.000619225	5.69437	2.82539	2.23219	1.89419	0.0352229	0.221889	-0.386876	8.32218	8.82218	-0.502938
1.90936	0.272754	0.0121202	0.000625422	5.68878	2.82487	2.23261	-0.12628	0.0346429	-0.5	-0.384347	8.30269	8.80269	-0.499652
1.91052	0.272607	0.0121121	0.000629152	5.6833	2.82436	2.23304	-0.12628	0.0341354	-0.43751	-0.381767	8.28302	8.78302	-0.496297
1.91168	0.272607	0.0120967	0.000625468	5.67727	2.82384	2.23346	0	0.0337001	-0.375216	-0.379162	8.26266	8.76266	-0.49291
1.91284	0.273047	0.0120754	0.000616292	5.67058	2.82333	2.23389	0.378839	0.0332801	-0.362129	-0.376558	8.24165	8.74165	-0.489526
1.914	0.273047	0.0120558	0.000609319	5.66382	2.82281	2.23431	0	0.0327043	-0.49632	-0.373961	8.2206	8.7206	-0.48615
1.91516	0.272168	0.0120431	0.00060922	5.65763	2.82229	2.23474	-0.757678	0.0321433	-0.483619	-0.371309	8.19983	8.69983	-0.482702
1.91632	0.272021	0.0120403	0.000618743	5.65235	2.82177	2.23517	-0.12628	0.0319381	-0.17691	-0.368606	8.17969	8.67969	-0.479188
1.91748	0.273193	0.0120349	0.000625246	5.647	2.82125	2.23559	1.01024	0.0318042	-0.115471	-0.36599	8.15994	8.65994	-0.475787
1.91864	0.273193	0.0120168	0.000620758	5.63999	2.82073	2.23602	0	0.0312295	-0.495422	-0.363486	8.13916	8.63916	-0.472532
1.9198	0.272754	0.0119919	0.000610227	5.63212	2.82021	2.23645	-0.378839	0.0306689	-0.483296	-0.360923	8.1172	8.6172	-0.4692
1.92096	0.273047	0.0119676	0.000600796	5.62408	2.81969	2.23688	0.252559	0.0302927	-0.324272	-0.358305	8.09475	8.59475	-0.465797
1.92212	0.273779	0.0119488	0.000597135	5.61636	2.81917	2.23731	0.631398	0.0298164	-0.410584	-0.355702	8.07273	8.57273	-0.462413
1.92328	0.273486	0.0119396	0.000602817	5.60953	2.81865	2.23774	-0.252559	0.0290692	-0.644195	-0.353075	8.05144	8.55144	-0.458997
1.92444	0.2729	0.0119288	0.000606296	5.60279	2.81812	2.23817	-0.505119	0.0284488	-0.534831	-0.350316	8.02953	8.52953	-0.455411
1.9256	0.272314	0.0119051	0.000596576	5.59516	2.8176	2.2386	-0.505119	0.0280687	-0.327632	-0.347474	8.00627	8.50627	-0.451717
1.92676	0.273047	0.0118751	0.000579977	5.58725	2.81708	2.23903	0.631398	0.0279288	-0.120581	-0.344642	7.98277	8.48277	-0.448034
1.92792	0.272314	0.011845	0.000563365	5.57933	2.81655	2.23947	-0.631398	0.0275171	-0.354924	-0.34191	7.95983	8.45983	-0.444483
1.92908	0.273193	0.0118195	0.000550857	5.572	2.81602	2.2399	0.757678	0.0274022	-0.09905	-0.339172	7.93744	8.43744	-0.440923
1.93024	0.273047	0.0118023	0.000546845	5.56518	2.8155	2.24033	-0.12628	0.0269584	-0.382635	-0.336542	7.91617	8.41617	-0.437505
1.9314	0.272314	0.0117957	0.000553803	5.55909	2.81497	2.24077	-0.631398	0.0265835	-0.323129	-0.333892	7.89549	8.39549	-0.434059
1.93256	0.273047	0.0117808	0.000548913	5.55379	2.81444	2.2412	0.631398	0.0265051	-0.0676172	-0.331246	7.87565	8.37565	-0.43062
1.93372	0.273486	0.0117578	0.000535747	5.54796	2.81391	2.24164	0.378839	0.0261542	-0.302513	-0.32872	7.85592	8.35592	-0.427335
1.93488	0.273193	0.0117326	0.000521174	5.5416	2.81338	2.24207	-0.252559	0.0256444	-0.439471	-0.326205	7.83572	8.33572	-0.424066
1.93604	0.27334	0.0117106	0.000509861	5.53547	2.81285	2.24251	0.12628	0.0252599	-0.331436	-0.323639	7.81548	8.31548	-0.42073
1.9372	0.273633	0.0116968	0.000505651	5.5304	2.81232	2.24294	0.252559	0.02483	-0.370666	-0.321069	7.79628	8.29628	-0.41739
1.93836	0.273633	0.0116933	0.000512116	5.52602	2.81179	2.24338	0	0.0242974	-0.459098	-0.318477	7.77764	8.27764	-0.414021
1.93952	0.274512	0.0116877	0.000510565	5.52394	2.81126	2.24382	0.757678	0.0237758	-0.449663	-0.315822	7.76096	8.26096	-0.410569
1.94068	0.2729	0.0116711	0.000499347	5.5204	2.81073	2.24426	-1.38908	0.0229236	-0.734658	-0.313107	7.74248	8.24248	-0.407039
1.94184	0.272168	0.0116502	0.000485054	5.51604	2.81019	2.2447	-0.631398	0.0227074	-0.18634	-0.310201	7.72214	8.22214	-0.403262
1.943	0.27334	0.0116317	0.00047318	5.51183	2.80966	2.24514	1.01024	0.0227859	0.0676681	-0.307352	7.70227	8.20227	-0.399557
1.94416	0.272168	0.0116204	0.000468668	5.50817	2.80912	2.24558	-1.01024	0.0224196	-0.315787	-0.304671	7.68386	8.18386	-0.396072
1.94532	0.271289	0.0116189	0.000473991	5.50525	2.80859	2.24602	-0.757678	0.0225185	0.0852224	-0.301986	7.66617	8.16617	-0.392581
1.94648	0.273779	0.011617	0.000477328	5.50294	2.80805	2.24646	2.14675	0.0229688	0.388193	-0.299474	7.65005	8.15005	-0.389317
1.94764	0.274512	0.0116021	0.000469058	5.49901	2.80752	2.2469	0.631398	0.0224624	-0.43653	-0.297273	7.63401	8.13401	-0.386455
1.9488	0.274512	0.0115801	0.000454126	5.49437	2.80698	2.24734	0	0.0216817	-0.672996	-0.295009	7.61692	8.11692	-0.383511
1.94996	0.273193	0.0115585	0.000440499	5.48939	2.80644	2.24778	-1.13652	0.0209108	-0.664577	-0.292574	7.59855	8.09855	-0.380346
1.95112	0.273193	0.0115425	0.000432844	5.4847	2.8059	2.24823	0	0.0206613	-0.215116	-0.289972	7.57954	8.07954	-0.376964
1.95228	0.273633	0.0115359	0.000434733	5.48071	2.80536	2.24867	0.378839	0.0204211	-0.207093	-0.287404	7.56143	8.06143	-0.373625
1.95344	0.272461	0.0115402	0.000447541	5.47753	2.80482	2.24912	-1.01024	0.0200194	-0.346276	-0.284872	7.54433	8.04433	-0.370333
1.9546	0.27334	0.0115314	0.000447079	5.4734	2.80428	2.24956	0.757678	0.0200818	0.0538	-0.282312	7.52611	8.02611	-0.367006
1.95576	0.270117	0.0115147	0.00043857	5.46871	2.80374	2.25001	-2.77815	0.0198119	-0.232628	-0.279904	7.50818	8.00818	-0.363875
1.95692	0.273633	0.0114981	0.000429985	5.4641	2.8032	2.25045	3.03071	0.0208025	0.853897	-0.277516	7.49044	7.99044	-0.360771
1.95808	0.274365	0.0114857	0.000425992	5.45966	2.80266	2.2509	0.631398	0.0204371	-0.314932	-0.275639	7.47568	7.97568	-0.358331
1.95924	0.269092	0.0114805	0.000431266	5.45495	2.80211	2.25135	-4.54607	0.0197966	-0.552185	-0.273744	7.46054	7.96054	-0.355867
1.9604	0.273633	0.0114883	0.000448006	5.45189	2.80157	2.25179	3.91467	0.0212128	1.22086	-0.271723	7.44637	7.94637	-0.35324
1.96156	0.275098	0.011483	0.000451751	5.44774	2.80103	2.25224	1.2628	0.0208752	-0.291071	-0.270375	7.43481	7.93481	-0.351488
1.96272	0.273486	0.011466	0.000445528	5.44194	2.80048	2.25269	-1.38908	0.0199781	-0.773343	-0.269018	7.42154	7.92154	-0.349723
1.96388	0.274805	0.0114476	0.000438131	5.43598	2.79994	2.25314	1.13652	0.0197157	-0.226168	-0.267433	7.40686	7.90686	-0.347663
1.96504	0.274512	0.0114326	0.000434231	5.43023	2.79939	2.25359	-0.252559	0.0189503	-0.659853	-0.265867	7.3925	7.8925	-0.345627
1.9662	0.273779	0.0114248	0.0004385	5.42464	2.79884	2.25404	-0.631398	0.0183072	-0.554418	-0.264123	7.37732	7.87732	-0.34336
1.96736	0.273486	0.0114264	0.00045369	5.41916	2.79829	2.25449	-0.252559	0.0179567	-0.30212	-0.262249	7.36153	7.86153	-0.340924
1.96852	0.276709	0.0114162	0.000456713	5.41292	2.79775	2.25494	2.77815	0.0177281	-0.197072	-0.260357	7.34488	7.84488	-0.338464
1.96968	0.273779	0.0113921	0.000445919	5.40552	2.7972	2.25539	-2.52559	0.0162561	-1.26902	-0.258493	7.32723	7.82723	-0.336041
1.97084	0.274365	0.0113649	0.000432578	5.39769	2.79665	2.25585	0.505119	0.015929	-0.28195	-0.256174	7.30665	7.80665	-0.333026
1.972	0.2729	0.0113397	0.000421632	5.38984	2.7961	2.2563	-1.2628	0.0153816	-0.471916	-0.253843	7.28597	7.78597	-0.329996
1.97316	0.272168	0.0113219	0.000417749	5.38272	2.79555	2.25675	-0.631398	0.0154099	0.0244362	-0.251414	7.26549	7.76549	-0.326839
1.97432	0.2729	0.0113138	0.000423678	5.37628	2.795	2.25721	0.631398	0.0157296	0.275609	-0.24911	7.24638	7.74638	-0.323843
1.97548	0.274072	0.0113103	0.000431448	5.37137	2.79444	2.25766	1.01024	0.015772	0.0365276	-0.247041	7.2301	7.7301	-0.321154
1.97664	0.274072	0.0112939	0.00042649	5.36536	2.79389	2.25811	0	0.0153664	-0.349649	-0.245101	7.21342	7.71342	-0.318631
1.9778	0.273779	0.0112723	0.000417601	5.35841	2.79334	2.25857	-0.252559	0.0149677	-0.343683	-0.243113	7.19553	7.69553	-0.316047
1.97896	0.274072	0.0112509	0.000409175	5.35139	2.79278	2.25903	0.252559	0.0146896	-0.239795	-0.24108	7.17733	7.67733	-0.313405
1.98012	0.272607	0.011235	0.000406708	5.3446	2.79223	2.25948	-1.2628	0.0143043	-0.332166	-0.239048	7.15936	7.65936	-0.310763
1.98128	0.27334	0.0112286	0.000413223	5.33881	2.79167	2.25994	0.631398	0.0144942	0.163767	-0.236974	7.14216	7.64216	-0.308066
1.98244	0.274951	0.0112338	0.000430921	5.33405	2.79112	2.2604	1.38908	0.0144063	-0.0757931	-0.23508	7.12699	7.62699	-0.305604
1.9836	0.273633	0.0112255	0.000436442	5.32769	2.79056	2.26085	-1.13652	0.0136992	-0.609616	-0.233258	7.11061	7.61061	-0.303236
1.98476	0.27334	0.011205	0.000431438	5.31971	2.79001	2.26131	-0.252559	0.0135101	-0.162954	-0.231267	7.09167	7.59167	-0.300647
1.98592	0.273633	0.0111834	0.000425528	5.31153	2.78945	2.26177	0.252559	0.013441	-0.0596328	-0.229306	7.07271	7.57271	-0.298098
1.98708	0.274658	0.0111653	0.000423385	5.30353	2.78889	2.26223	0.883957	0.0132641	-0.15249	-0.227422	7.05435	7.55435	-0.295648
1.98824	0.273486	0.0111556	0.000430506	5.29586	2.78833	2.26269	-1.01024	0.012695	-0.490603	-0.225571	7.0365	7.5365	-0.293242
1.9894	0.2729	0.011158	0.000448544	5.28959	2.78777	2.26315	-0.505119	0.0125867	-0.0933707	-0.223601	7.01939	7.51939	-0.290681
1.99056	0.273779	0.0111509	0.000454962	5.28348	2.78721	2.26361	0.757678	0.0127116	0.107668	-0.22169	7.00277	7.50277	-0.288197
1.99172	0.273486	0.0111306	0.000448388	5.27622	2.78665	2.26407	-0.252559	0.0125009	-0.181622	-0.219927	6.98581	7.48581	-0.285905
1.99288	0.274072	0.0111094	0.000440642	5.26899	2.78609	2.26454	0.505119	0.0124096	-0.0786922	-0.218181	6.96898	7.46898	-0.283635
1.99404	0.274365	0.0110908	0.000435845	5.26185	2.78553	2.265	0.252559	0.0120964	-0.270024	-0.216498	6.95259	7.45259	-0.281448
1.9952	0.275537	0.0110787	0.000438942	5.25464	2.78497	2.26546	1.01024	0.0116748	-0.363403	-0.214791	6.936	7.436	-0.279229
1.99636	0.273047	0.011077	0.00045296	5.24801	2.7844	2.26592	-2.14675	0.0108035	-0.751172	-0.213017	6.91961	7.41961	-0.276923
1.99752	0.275977	0.0110762	0.000466908	5.24189	2.78384	2.26639	2.52559	0.010904	0.0866672	-0.211001	6.9024	7.4024	-0.274301
1.99868	0.27334	0.0110621	0.000468145	5.23448	2.78327	2.26685	-2.27303	0.00987175	-0.889856	-0.209119	6.88464	7.38464	-0.271855
1.99984	0.274072	0.0110444	0.000466568	5.22642	2.78271	2.26732	0.631398	0.00986788	-0.00334138	-0.20693	6.86454	7.36454	-0.269009
2.001	0.273779	0.0110284	0.000467127	5.21837	2.78214	2.26778	-0.252559	0.00958403	-0.244698	-0.204833	6.84495	7.34495	-0.266283
2.00216	0.273486	0.0110184	0.00047422	5.21052	2.78158	2.26825	-0.252559	0.00941826	-0.142902	-0.202718	6.82547	7.32547	-0.263533
2.00332	0.273779	0.0110179	0.00049115	5.20328	2.78101	2.26872	0.252559	0.00937051	-0.0411681	-0.20063	6.80674	7.30674	-0.260818
2.00448	0.27334	0.0110177	0.000508301	5.19615	2.78044	2.26918	-0.378839	0.00921321	-0.135604	-0.198613	6.78852	7.28852	-0.258197
2.00564	0.273779	0.0110051	0.00051276	5.18811	2.77988	2.26965	0.378839	0.00923071	0.0150862	-0.196625	6.76955	7.26955	-0.255613
2.0068	0.273193	0.0109838	0.000508927	5.17924	2.77931	2.27012	-0.505119	0.00908171	-0.128443	-0.194733	6.75027	7.25027	-0.253153
2.00796	0.27334	0.0109632	0.000505599	5.17049	2.77874	2.27059	0.12628	0.00916435	0.0712353	-0.19287	6.73127	7.23127	-0.250731
2.00912	0.27334	0.0109484	0.000507998	5.16227	2.77817	2.27105	0	0.00919422	0.0257569	-0.191126	6.71346	7.21346	-0.248464
2.01028	0.274951	0.0109426	0.000519424	5.1547	2.7776	2.27152	1.38908	0.00922824	0.0293267	-0.18948	6.69684	7.19684	-0.246324
2.01144	0.274951	0.0109363	0.00053026	5.14715	2.77703	2.27199	0	0.0086407	-0.506506	-0.187933	6.68078	7.18078	-0.244312
2.0126	0.275391	0.010918	0.000528963	5.13872	2.77646	2.27246	0.378839	0.00805704	-0.503151	-0.186242	6.66305	7.16305	-0.242114
2.01376	0.273779	0.0108916	0.000519381	5.1297	2.77588	2.27293	-1.38908	0.00730636	-0.647135	-0.184408	6.64395	7.14395	-0.23973
2.01492	0.274658	0.0108644	0.000509484	5.12045	2.77531	2.27341	0.757678	0.0071847	-0.104881	-0.182366	6.62346	7.12346	-0.237075
2.01608	0.273779	0.0108406	0.000504216	5.11094	2.77474	2.27388	-0.757678	0.00672497	-0.396319	-0.180358	6.60291	7.10291	-0.234466
2.01724	0.281689	0.0108254	0.000507424	5.10215	2.77416	2.27435	6.8191	0.00660957	-0.0994802	-0.178254	6.58255	7.08255	-0.23173
2.0184	0.272754	0.0108141	0.00051141	5.09496	2.77359	2.27482	-7.70306	0.00342543	-2.74496	-0.176185	6.56398	7.06398	-0.22904
2.01956	0.274951	0.0108014	0.000514253	5.08759	2.77302	2.2753	1.89419	0.00371274	0.247682	-0.172959	6.53886	7.03886	-0.224846
2.02072	0.274072	0.0107798	0.000508804	5.0792	2.77244	2.27577	-0.757678	0.00314846	-0.486445	-0.169922	6.51377	7.01377	-0.220898
2.02188	0.274219	0.0107562	0.000501936	5.07046	2.77186	2.27624	0.12628	0.00292691	-0.190995	-0.166742	6.48755	6.98755	-0.216765
2.02304	0.273633	0.0107349	0.000498043	5.06159	2.77129	2.27672	-0.505119	0.00264979	-0.238896	-0.163552	6.46113	6.96113	-0.212618
2.0242	0.27334	0.0107201	0.000500974	5.05316	2.77071	2.27719	-0.252559	0.0026014	-0.0417155	-0.160328	6.43496	6.93496	-0.208426
2.02536	0.273926	0.0107158	0.000514029	5.04568	2.77013	2.27767	0.505119	0.00266795	0.0573698	-0.157157	6.41004	6.91004	-0.204304
2.02652	0.274072	0.010711	0.000526491	5.03817	2.76955	2.27814	0.12628	0.00250816	-0.137745	-0.154083	6.38563	6.88563	-0.200308
2.02768	0.273779	0.0106955	0.000529568	5.02927	2.76898	2.27862	-0.252559	0.00229262	-0.185809	-0.151016	6.35987	6.85987	-0.196321
2.02884	0.270557	0.010673	0.000527935	5.01894	2.7684	2.2791	-2.77815	0.00219189	-0.0868431	-0.147934	6.33258	6.83258	-0.192314
2.03	0.275244	0.0106525	0.000528464	5.00866	2.76782	2.27958	4.04095	0.00334358	0.992841	-0.144879	6.30549	6.80549	-0.188343
2.03116	0.274365	0.0106369	0.000535281	4.99819	2.76724	2.28005	-0.757678	0.0026765	-0.575072	-0.142337	6.28105	6.78105	-0.185038
2.03232	0.271875	0.0106309	0.000551962	4.98837	2.76665	2.28053	-2.14675	0.00235192	-0.279805	-0.139599	6.25617	6.75617	-0.181479
2.03348	0.27334	0.0106246	0.000568343	4.97853	2.76607	2.28101	1.2628	0.00299543	0.554751	-0.136799	6.23092	6.73092	-0.177838
2.03464	0.27583	0.0106072	0.000573157	4.96803	2.76549	2.28149	2.14675	0.00307146	0.0655362	-0.13431	6.20673	6.70673	-0.174603
2.0358	0.27334	0.0105824	0.000570532	4.95693	2.76491	2.28197	-2.14675	0.00218184	-0.766915	-0.131911	6.18244	6.68244	-0.171484
2.03696	0.2729	0.0105589	0.000568989	4.94604	2.76432	2.28245	-0.378839	0.00226022	0.0675759	-0.129226	6.15678	6.65678	-0.167994
2.03812	0.274951	0.0105406	0.000572652	4.93553	2.76374	2.28293	1.76791	0.00251028	0.215567	-0.126629	6.13199	6.63199	-0.164618
2.03928	0.271436	0.010529	0.000585371	4.92462	2.76315	2.28341	-3.03071	0.0019651	-0.469988	-0.124187	6.10765	6.60765	-0.161443
2.04044	0.2729	0.0105165	0.00059588	4.91418	2.76257	2.28389	1.2628	0.00278601	0.707684	-0.121589	6.08292	6.58292	-0.158066
2.0416	0.274365	0.010504	0.000606107	4.90381	2.76198	2.28438	1.2628	0.00303934	0.218387	-0.119365	6.06032	6.56032	-0.155174
2.04276	0.273486	0.0104839	0.00060891	4.89282	2.7614	2.28486	-0.757678	0.0027252	-0.270811	-0.117293	6.03792	6.53792	-0.15248
2.04392	0.273633	0.0104627	0.000610888	4.88157	2.76081	2.28534	0.12628	0.00275359	0.0244741	-0.115151	6.0149	6.5149	-0.149697
2.04508	0.27334	0.0104457	0.000616991	4.87073	2.76022	2.28582	-0.252559	0.00272633	-0.023494	-0.113073	5.99263	6.49263	-0.146994
2.04624	0.273633	0.0104366	0.000630795	4.86057	2.75964	2.28631	0.252559	0.00281408	0.0756397	-0.111034	5.97126	6.47126	-0.144345
2.0474	0.273779	0.0104254	0.00064296	4.85008	2.75905	2.28679	0.12628	0.00278932	-0.0213431	-0.10908	5.95002	6.45002	-0.141804
2.04856	0.274072	0.0104133	0.00065459	4.83935	2.75846	2.28728	0.252559	0.00270893	-0.0692974	-0.107166	5.92876	6.42876	-0.139315
2.04972	0.273486	0.0103934	0.000658816	4.82782	2.75787	2.28776	-0.505119	0.002516	-0.166321	-0.105268	5.9068	6.4068	-0.136849
2.05088	0.274512	0.0103678	0.000656742	4.81612	2.75728	2.28825	0.883958	0.00255174	0.0308069	-0.103343	5.88451	6.38451	-0.134346
2.05204	0.273926	0.0103443	0.000657438	4.80429	2.75669	2.28873	-0.505119	0.00219044	-0.311467	-0.101479	5.86242	6.36242	-0.131922
2.0532	0.274072	0.0103269	0.000665304	4.79252	2.7561	2.28922	0.12628	0.00205766	-0.114465	-0.0995194	5.83987	6.33987	-0.129375
2.05436	0.273633	0.0103093	0.000672096	4.78111	2.7555	2.28971	-0.378839	0.00186892	-0.162703	-0.0975535	5.81765	6.31765	-0.12682
2.05552	0.273779	0.0102908	0.000678091	4.76953	2.75491	2.2902	0.12628	0.00185168	-0.0148647	-0.0955583	5.7951	6.2951	-0.124226
2.05668	0.273779	0.010269	0.000677793	4.75897	2.75432	2.29068	0	0.00177838	-0.0631828	-0.0935994	5.77377	6.27377	-0.121679
2.05784	0.273486	0.010241	0.000671203	4.74794	2.75373	2.29117	-0.252559	0.00170589	-0.0624931	-0.0916541	5.75204	6.25204	-0.11915
2.059	0.273779	0.0102141	0.000666015	4.73691	2.75313	2.29166	0.252559	0.00174794	0.0362457	-0.0897221	5.73038	6.23038	-0.116639
2.06016	0.273633	0.0101917	0.000666352	4.72578	2.75254	2.29215	-0.12628	0.001677	-0.0611509	-0.0878467	5.70893	6.20893	-0.114201
2.06132	0.270264	0.0101718	0.000666164	4.7161	2.75194	2.29264	-2.90443	0.00166371	-0.0114629	-0.0859834	5.68901	6.18901	-0.111778
2.06248	0.273926	0.0101514	0.000665452	4.70638	2.75135	2.29313	3.15699	0.00295949	1.11705	-0.0841537	5.66923	6.16923	-0.1094
2.06364	0.273047	0.0101344	0.000668889	4.69659	2.75075	2.29362	-0.757678	0.00283451	-0.107743	-0.082865	5.65234	6.15234	-0.107725
2.0648	0.272754	0.0101104	0.00066548	4.68625	2.75015	2.29411	-0.252559	0.00305211	0.187585	-0.0815652	5.63486	6.13486	-0.106035
2.06596	0.274365	0.0100868	0.000662371	4.67592	2.74956	2.2946	1.38908	0.00338485	0.286846	-0.0803866	5.61805	6.11805	-0.104503
2.06712	0.27334	0.0100678	0.000664509	4.66573	2.74896	2.29509	-0.883957	0.00309339	-0.251256	-0.0793734	5.60228	6.10228	-0.103185
2.06828	0.274365	0.0100562	0.000674371	4.65598	2.74836	2.29559	0.883957	0.00320151	0.0932103	-0.0782828	5.58654	6.08654	-0.101768
2.06944	0.275098	0.010043	0.000683712	4.64564	2.74776	2.29608	0.631398	0.00291289	-0.248811	-0.0772694	5.57062	6.07062	-0.10045
2.0706	0.274072	0.0100305	0.000696661	4.6342	2.74716	2.29657	-0.883957	0.00234116	-0.492869	-0.0761788	5.55318	6.05318	-0.0990324
2.07176	0.273633	0.0100106	0.000702776	4.62191	2.74656	2.29707	-0.378839	0.00216868	-0.148696	-0.0749005	5.53387	6.03387	-0.0973706
2.07292	0.274072	0.00998545	0.000703983	4.60907	2.74596	2.29756	0.378839	0.00216782	-0.000739655	-0.0735889	5.51381	6.01381	-0.0956656
2.07408	0.273486	0.00996382	0.000709083	4.59635	2.74536	2.29806	-0.505119	0.00199729	-0.147011	-0.0723101	5.49406	5.99406	-0.0940032
2.07524	0.274219	0.00994926	0.000721101	4.58426	2.74476	2.29855	0.631398	0.00205519	0.0499155	-0.0709977	5.47475	5.97475	-0.092297
2.0764	0.273633	0.0099319	0.00073097	4.57168	2.74416	2.29905	-0.505119	0.0018296	-0.194476	-0.0697398	5.45525	5.95525	-0.0906617
2.07756	0.273779	0.00991363	0.000740343	4.55885	2.74356	2.29954	0.12628	0.00183237	0.00238707	-0.0684256	5.43519	5.93519	-0.0889533
2.07872	0.273926	0.00989583	0.000745652	4.54793	2.74295	2.30004	0.12628	0.00177908	-0.0459405	-0.0671434	5.41722	5.91722	-0.0872864
2.07988	0.273926	0.00987244	0.000745523	4.53651	2.74235	2.30053	0	0.0016697	-0.0942871	-0.0658707	5.3988	5.8988	-0.0856319
2.08104	0.273779	0.00985087	0.000747655	4.52505	2.74175	2.30103	-0.12628	0.00156108	-0.0936379	-0.0645852	5.38027	5.88027	-0.0839608
2.0822	0.273633	0.00983552	0.000755898	4.51412	2.74114	2.30153	-0.12628	0.00151005	-0.0439948	-0.0632867	5.3622	5.8622	-0.0822727
2.08336	0.273779	0.00981729	0.000761733	4.50278	2.74054	2.30203	0.12628	0.00151658	0.00562931	-0.0619968	5.34376	5.84376	-0.0805958
2.08452	0.273926	0.0097973	0.000766536	4.49099	2.73993	2.30253	0.12628	0.00146691	-0.042819	-0.0607374	5.32504	5.82504	-0.0789586
2.08568	0.273779	0.00978211	0.000776909	4.47926	2.73933	2.30302	-0.12628	0.00136101	-0.0912871	-0.059486	5.30643	5.80643	-0.0773318
2.08684	0.273779	0.00976128	0.000781859	4.467	2.73872	2.30352	0	0.00131262	-0.0417216	-0.0582203	5.28722	5.78722	-0.0756865
2.088	0.272021	0.00973948	0.000786886	4.45424	2.73811	2.30402	-1.51536	0.00126481	-0.0412112	-0.0569621	5.26753	5.76753	-0.0740507
2.08916	0.273486	0.00972246	0.000795843	4.4422	2.73751	2.30452	1.2628	0.00190018	0.547734	-0.055711	5.24861	5.74861	-0.0724243
2.09032	0.274072	0.00970226	0.000801309	4.43003	2.7369	2.30502	0.505119	0.00196757	0.058094	-0.0547316	5.23105	5.73105	-0.0711511
2.09148	0.273779	0.00968049	0.000805487	4.41763	2.73629	2.30552	-0.252559	0.00180831	-0.137294	-0.0538032	5.21355	5.71355	-0.0699441
2.09264	0.273779	0.00966294	0.000813877	4.40556	2.73568	2.30602	0	0.00176363	-0.0385164	-0.0528371	5.19617	5.69617	-0.0686882
2.0938	0.273779	0.00963915	0.000816036	4.393	2.73507	2.30653	0	0.00171975	-0.037831	-0.0518774	5.17832	5.67832	-0.0674406
2.09496	0.271729	0.00961157	0.000814164	4.38024	2.73446	2.30703	-1.76791	0.00167664	-0.0371629	-0.0509241	5.16032	5.66032	-0.0662013
2.09612	0.273633	0.0095879	0.000815959	4.36789	2.73385	2.30753	1.64164	0.00243066	0.650017	-0.0499769	5.14276	5.64276	-0.06497
2.09728	0.273633	0.00956069	0.000813722	4.35546	2.73324	2.30803	0	0.00244628	0.0134698	-0.0493451	5.12686	5.62686	-0.0641487
2.09844	0.273926	0.00953133	0.000809653	4.34273	2.73263	2.30854	0.252559	0.00246301	0.014419	-0.0487416	5.11081	5.61081	-0.0633641
2.0996	0.273193	0.00950583	0.000810073	4.33005	2.73202	2.30904	-0.631398	0.00236708	-0.0826991	-0.0481666	5.09496	5.59496	-0.0626165
2.10076	0.27334	0.00948281	0.00080756	4.31979	2.7314	2.30954	0.12628	0.00255663	0.163409	-0.047576	5.08146	5.58146	-0.0618487
2.10192	0.273633	0.00945567	0.000800736	4.30928	2.73079	2.31005	0.252559	0.00269046	0.115363	-0.0470804	5.06822	5.56822	-0.0612045
2.10308	0.273486	0.00943153	0.000797298	4.29886	2.73018	2.31055	-0.12628	0.00271172	0.0183328	-0.046658	5.05548	5.55548	-0.0606554
2.10424	0.27334	0.0094038	0.000789271	4.28856	2.72956	2.31106	-0.12628	0.00279109	0.0684241	-0.0462649	5.04302	5.54302	-0.0601443
2.1054	0.273047	0.00937273	0.0007783	4.27784	2.72895	2.31157	-0.252559	0.00292861	0.118545	-0.0459234	5.03041	5.53041	-0.0597004
2.10656	0.27334	0.00934491	0.000770705	4.26731	2.72833	2.31207	0.252559	0.0031812	0.217759	-0.045656	5.01842	5.51842	-0.0593528
2.10772	0.274951	0.00932389	0.000769781	4.25739	2.72772	2.31258	1.38908	0.00332147	0.120917	-0.0455073	5.00768	5.50768	-0.0591595
2.10888	0.273633	0.00929813	0.000764805	4.2468	2.7271	2.31308	-1.13652	0.00283751	-0.417208	-0.0454335	4.99668	5.49668	-0.0590636
2.11004	0.274805	0.00927339	0.000761549	4.236	2.72649	2.31359	1.01024	0.00286678	0.0252336	-0.0451923	4.98455	5.48455	-0.05875
2.1112	0.274658	0.00925404	0.000764684	4.22521	2.72587	2.3141	-0.12628	0.00244227	-0.365955	-0.0449828	4.97262	5.47262	-0.0584777
2.11236	0.273633	0.00922992	0.000764591	4.21342	2.72525	2.31461	-0.883957	0.00207575	-0.31597	-0.0446287	4.95887	5.45887	-0.0580174
2.11352	0.273486	0.00920595	0.000766217	4.20099	2.72463	2.31512	-0.12628	0.00210834	0.0281017	-0.0441524	4.94383	5.44383	-0.0573982
2.11468	0.274365	0.00918818	0.000773963	4.18908	2.72402	2.31563	0.757678	0.00219878	0.0779586	-0.0437087	4.92948	5.42948	-0.0568213
2.11584	0.273779	0.00916588	0.000777658	4.17661	2.7234	2.31613	-0.505119	0.00194889	-0.215415	-0.0433197	4.91487	5.41487	-0.0563156
2.117	0.273633	0.00914041	0.000778405	4.16381	2.72278	2.31664	-0.12628	0.00192743	-0.0185069	-0.0428532	4.8995	5.3995	-0.0557092
2.11816	0.274365	0.0091189	0.000783352	4.15122	2.72216	2.31715	0.631398	0.00196371	0.0312793	-0.0423977	4.88441	5.38441	-0.055117
2.11932	0.273926	0.00909256	0.000784254	4.13792	2.72154	2.31766	-0.378839	0.00171646	-0.213147	-0.0419754	4.86879	5.36879	-0.054568
2.12048	0.273779	0.00906301	0.000782485	4.12416	2.72092	2.31818	-0.12628	0.00164063	-0.0653672	-0.041476	4.85227	5.35227	-0.0539188
2.12164	0.273486	0.00903795	0.000786017	4.1104	2.7203	2.31869	-0.252559	0.00162243	-0.0156914	-0.0409658	4.83572	5.33572	-0.0532555
2.1228	0.273486	0.0090212	0.000789629	4.1007	2.71967	2.3192	0	0.00171873	0.0830129	-0.040467	4.82327	5.32327	-0.0526071
2.12396	0.273633	0.0090015	0.000790299	4.09076	2.71905	2.31971	0.12628	0.0018158	0.083681	-0.0400238	4.81089	5.31089	-0.0520309
2.12512	0.273779	0.0089846	0.000794349	4.0808	2.71843	2.32022	0.12628	0.0018568	0.0353483	-0.0396363	4.7988	5.2988	-0.0515272
2.12628	0.273779	0.0089617	0.000792708	4.07024	2.71781	2.32074	0	0.00184176	-0.0129681	-0.0392827	4.78629	5.28629	-0.0510675
2.12744	0.273779	0.00893554	0.000788126	4.05929	2.71718	2.32125	0	0.00182754	-0.0122534	-0.0389408	4.77347	5.27347	-0.0506231
2.1286	0.273486	0.00891353	0.000787748	4.04865	2.71656	2.32176	-0.252559	0.00181415	-0.0115431	-0.038611	4.76101	5.26101	-0.0501943
2.12976	0.274658	0.00889841	0.000794874	4.0383	2.71594	2.32228	1.01024	0.00191535	0.0872362	-0.0382934	4.74891	5.24891	-0.0497814
2.13092	0.274219	0.00887973	0.000799609	4.02718	2.71531	2.32279	-0.378839	0.00156233	-0.304322	-0.0380324	4.73636	5.23636	-0.0494421
2.13208	0.274805	0.00886297	0.00080718	4.01584	2.71469	2.3233	0.505119	0.00138068	-0.156602	-0.0376513	4.72292	5.22292	-0.0489467
2.13324	0.273779	0.00883961	0.000809065	4.0036	2.71406	2.32382	-0.883957	0.000972104	-0.352217	-0.0372167	4.70829	5.20829	-0.0483817
2.1344	0.274072	0.00881155	0.000807192	3.9906	2.71343	2.32433	0.252559	0.000962157	-0.008575	-0.0366402	4.69213	5.19213	-0.0476323
2.13556	0.273779	0.00878731	0.000809806	3.97764	2.71281	2.32485	-0.252559	0.000838875	-0.106278	-0.0360764	4.67606	5.17606	-0.0468993
2.13672	0.274512	0.00876964	0.000819385	3.96502	2.71218	2.32537	0.631398	0.00082974	-0.007875	-0.0354809	4.66016	5.16016	-0.0461252
2.13788	0.273779	0.00874779	0.000825758	3.95167	2.71155	2.32588	-0.631398	0.000536558	-0.252743	-0.0348979	4.64361	5.14361	-0.0453672
2.13904	0.273926	0.00872368	0.000830305	3.93797	2.71092	2.3264	0.12628	0.000528038	-0.00734483	-0.0342167	4.62616	5.12616	-0.0444817
2.1402	0.273633	0.00869373	0.000828627	3.92397	2.7103	2.32692	-0.252559	0.000462872	-0.0561776	-0.0335476	4.60848	5.10848	-0.0436119
2.14136	0.273486	0.00865874	0.0008221	3.90949	2.70967	2.32743	-0.12628	0.000511682	0.0420776	-0.0328684	4.59027	5.09027	-0.0427289
2.14252	0.274072	0.00862559	0.000817867	3.89497	2.70904	2.32795	0.505119	0.000617606	0.0913138	-0.0322229	4.57219	5.07219	-0.0418897
2.14368	0.273633	0.00859864	0.000820602	3.88062	2.70841	2.32847	-0.378839	0.000496273	-0.104597	-0.031633	4.5546	5.0546	-0.0411229
2.14484	0.273779	0.00857789	0.000823158	3.86939	2.70778	2.32899	0.12628	0.000545816	0.0427095	-0.0310103	4.53994	5.03994	-0.0403134
2.146	0.273926	0.00855453	0.00082306	3.85797	2.70715	2.32951	0.12628	0.00053872	-0.00611724	-0.0304208	4.52528	5.02528	-0.039547
2.14716	0.273633	0.00853185	0.000818934	3.84854	2.70652	2.33003	-0.252559	0.000474983	-0.0549457	-0.0298422	4.51267	5.01267	-0.0387949
2.14832	0.274219	0.00850352	0.000809404	3.83857	2.70588	2.33055	0.505119	0.000525228	0.0433147	-0.0292523	4.49945	4.99945	-0.038028
2.14948	0.273779	0.00847474	0.000800789	3.828	2.70525	2.33107	-0.378839	0.000348174	-0.152633	-0.0286951	4.48582	4.98582	-0.0373037
2.15064	0.27627	0.00845046	0.000797484	3.81744	2.70462	2.33159	2.14675	0.000341928	-0.00538448	-0.0280821	4.47189	4.97189	-0.0365068
2.1518	0.273779	0.00843478	0.000802787	3.80757	2.70399	2.33211	-2.14675	-0.00063119	-0.838895	-0.0274793	4.4587	4.9587	-0.0357231
2.15296	0.273779	0.00841643	0.000805428	3.79747	2.70335	2.33263	0	-0.000637566	-0.00549655	-0.026511	4.44328	4.94328	-0.0344644
2.15412	0.273633	0.00839594	0.000808706	3.78607	2.70272	2.33315	-0.12628	-0.000644229	-0.00574397	-0.0255522	4.42661	4.92661	-0.0332179
2.15528	0.273633	0.00836919	0.000805751	3.77417	2.70209	2.33367	0	-0.000594298	0.043044	-0.0246023	4.40948	4.90948	-0.031983
2.15644	0.273779	0.00833837	0.000801235	3.7609	2.70145	2.3342	0.12628	-0.000544636	0.0428121	-0.0236829	4.39116	4.89116	-0.0307877
2.1576	0.273633	0.00831114	0.000800929	3.74767	2.70082	2.33472	-0.12628	-0.000552102	-0.00643621	-0.0227934	4.37304	4.87304	-0.0296314
2.15876	0.273926	0.00829109	0.000808408	3.73475	2.70018	2.33524	0.252559	-0.000502933	0.0423871	-0.0219113	4.35526	4.85526	-0.0284846
2.15992	0.27334	0.00826885	0.000813502	3.72174	2.69955	2.33577	-0.505119	-0.000567759	-0.0558845	-0.0210581	4.33756	4.83756	-0.0273755
2.16108	0.273779	0.00824468	0.000816764	3.70854	2.69891	2.33629	0.378839	-0.000405305	0.140047	-0.0201893	4.31958	4.81958	-0.026246
2.16224	0.273926	0.00821281	0.000812695	3.69458	2.69827	2.33681	0.12628	-0.000413685	-0.00722414	-0.0193926	4.30124	4.80124	-0.0252104
2.1634	0.273486	0.00817596	0.000804044	3.68006	2.69763	2.33734	-0.378839	-0.000479135	-0.0564224	-0.0186014	4.28237	4.78237	-0.0241818
2.16456	0.273633	0.00814182	0.00079878	3.66548	2.697	2.33786	0.12628	-0.000374149	0.0905052	-0.0177932	4.26335	4.76335	-0.0231312
2.16572	0.273486	0.00811395	0.00080075	3.651	2.69636	2.33839	-0.12628	-0.000326216	0.0413216	-0.0170338	4.24468	4.74468	-0.0221439
2.16688	0.273779	0.00809563	0.00080693	3.63946	2.69572	2.33891	0.252559	-0.000221546	0.0902328	-0.0163006	4.22912	4.72912	-0.0211908
2.16804	0.273633	0.00807586	0.000811275	3.62797	2.69508	2.33944	-0.12628	-0.000230743	-0.00792845	-0.0156155	4.21386	4.71386	-0.0203001
2.1692	0.273633	0.00804858	0.000808012	3.61593	2.69444	2.33996	0	-0.000183161	0.041019	-0.0149338	4.19807	4.69807	-0.0194139
2.17036	0.273926	0.00801488	0.00079879	3.6032	2.6938	2.34049	0.252559	-0.000135661	0.0409483	-0.0142773	4.18172	4.68172	-0.0185605
2.17152	0.273926	0.00798326	0.000792128	3.59043	2.69316	2.34102	0	-0.00020199	-0.0571802	-0.0136457	4.16548	4.66548	-0.0177394
2.17268	0.273486	0.00795784	0.000792696	3.57772	2.69252	2.34154	-0.378839	-0.00026841	-0.0572586	-0.0129944	4.14919	4.64919	-0.0168928
2.17384	0.273779	0.00794163	0.000802695	3.56565	2.69188	2.34207	0.252559	-0.000164299	0.0897509	-0.0123233	4.13343	4.63343	-0.0160203
2.175	0.273486	0.00792334	0.000810582	3.55343	2.69124	2.3426	-0.252559	-0.00017403	-0.00838879	-0.0116981	4.11777	4.61777	-0.0152075
2.17616	0.273633	0.00789281	0.000807562	3.53969	2.6906	2.34313	0.12628	-7.00714e-05	0.0895948	-0.0110744	4.1006	4.6006	-0.0143967
2.17732	0.273779	0.00785606	0.000798307	3.52548	2.68996	2.34366	0.12628	-2.30284e-05	0.0406034	-0.0104961	4.0832	4.5832	-0.0136449
2.17848	0.2729	0.00781939	0.000789687	3.51104	2.68932	2.34419	-0.757678	-3.28797e-05	-0.00853448	-0.00994074	4.06571	4.56571	-0.012923
2.17964	0.273633	0.00778803	0.000786648	3.4969	2.68867	2.34471	0.631398	0.000298558	0.28574	-0.00938605	4.04853	4.54853	-0.0122019
2.1808	0.273779	0.00776552	0.000792761	3.48334	2.68803	2.34524	0.12628	0.00034571	0.0406483	-0.0089643	4.03264	4.53264	-0.0116536
2.18196	0.273633	0.00774141	0.000797032	3.46975	2.68739	2.34577	-0.12628	0.000336134	-0.00825517	-0.00856489	4.01686	4.51686	-0.0111344
2.18312	0.273926	0.00770689	0.000789016	3.45612	2.68674	2.3463	0.252559	0.000383593	0.0409129	-0.00816563	4.00103	4.50103	-0.0106153
2.18428	0.273779	0.00766552	0.000774207	3.44192	2.6861	2.34683	-0.12628	0.000317458	-0.0570129	-0.00778848	3.98476	4.48476	-0.010125
2.18544	0.273633	0.00762333	0.000758922	3.42752	2.68545	2.34736	-0.12628	0.000308349	-0.00785259	-0.00738915	3.96816	4.46816	-0.00960589
2.1866	0.273779	0.00758443	0.000747554	3.41312	2.68481	2.3479	0.12628	0.000356263	0.0413052	-0.00698961	3.95156	4.45156	-0.0090865
2.18776	0.273779	0.00755291	0.000744496	3.39891	2.68416	2.34843	0	0.000347454	-0.00759397	-0.00661183	3.93528	4.43528	-0.00859538
2.18892	0.273633	0.00753235	0.000752497	3.38553	2.68352	2.34896	-0.12628	0.000338801	-0.00745948	-0.00623361	3.91981	4.41981	-0.00810369
2.19008	0.273633	0.0075098	0.000758362	3.37205	2.68287	2.34949	0	0.000387185	0.0417103	-0.00585483	3.90425	4.40425	-0.00761128
2.19124	0.273633	0.00747812	0.000755497	3.35769	2.68222	2.35002	0	0.000435743	0.0418603	-0.00549748	3.88792	4.38792	-0.00714672
2.1924	0.273779	0.0074436	0.000750498	3.34281	2.68157	2.35056	0.12628	0.000484498	0.0420302	-0.00516146	3.8712	4.3712	-0.0067099
2.19356	0.273779	0.00741174	0.000748312	3.32808	2.68093	2.35109	0	0.000476587	-0.00681983	-0.0048467	3.85474	4.35474	-0.00630071
2.19472	0.273633	0.00738637	0.000753062	3.31368	2.68028	2.35162	-0.12628	0.00046889	-0.00663534	-0.00453105	3.8386	4.3386	-0.00589037
2.19588	0.27334	0.0073705	0.000767774	3.29983	2.67963	2.35216	-0.252559	0.000518289	0.0425853	-0.00421446	3.82301	4.32301	-0.00547879
2.19704	0.273486	0.00735312	0.000780634	3.286	2.67898	2.35269	0.12628	0.000681689	0.140862	-0.00391894	3.80756	4.30756	-0.00509462
2.1982	0.2729	0.00732269	0.000780098	3.27129	2.67833	2.35322	-0.505119	0.000788512	0.0920888	-0.00368864	3.79158	4.29158	-0.00479524
2.19936	0.273926	0.00728495	0.000772491	3.25591	2.67768	2.35376	0.883957	0.00112323	0.288546	-0.00350149	3.77517	4.27517	-0.00455194
2.20052	0.273779	0.00724815	0.000766607	3.24028	2.67703	2.35429	-0.12628	0.00106026	-0.0542819	-0.00344589	3.75924	4.25924	-0.00447966
2.20168	0.273486	0.00721749	0.000767393	3.22492	2.67638	2.35483	-0.252559	0.00105465	-0.00483276	-0.0033674	3.74344	4.24344	-0.00437762
2.20284	0.273779	0.00719598	0.000777872	3.21004	2.67573	2.35536	0.252559	0.00116329	0.0936526	-0.00328824	3.72813	4.22813	-0.00427471
2.204	0.273486	0.00717344	0.000786778	3.19532	2.67508	2.3559	-0.252559	0.00115868	-0.00397155	-0.00325275	3.71321	4.21321	-0.00422858
2.20516	0.273779	0.00713858	0.000782841	3.17983	2.67443	2.35644	0.252559	0.00126836	0.0945543	-0.00321694	3.69753	4.19753	-0.00418202
2.20632	0.273779	0.00709579	0.000771285	3.1636	2.67378	2.35697	0	0.00126485	-0.00302931	-0.00322517	3.68134	4.18134	-0.00419272
2.20748	0.273633	0.00705274	0.000760076	3.1471	2.67313	2.35751	-0.12628	0.00126191	-0.00253793	-0.00323348	3.66489	4.16489	-0.00420353
2.20864	0.273633	0.00701465	0.000754159	3.13085	2.67247	2.35805	0	0.00131642	0.0469905	-0.00324211	3.64868	4.14868	-0.00421475
2.2098	0.273926	0.00698535	0.00075738	3.11514	2.67182	2.35858	0.252559	0.00137152	0.0475009	-0.00327337	3.63315	4.13315	-0.00425538
2.21096	0.273633	0.00696673	0.000771666	3.10013	2.67117	2.35912	-0.252559	0.00131347	-0.0500414	-0.0033275	3.61843	4.11843	-0.00432575
2.21212	0.273779	0.00693489	0.000772827	3.08402	2.67051	2.35966	0.12628	0.00136978	0.048544	-0.00336059	3.60251	4.10251	-0.00436876
2.21328	0.273633	0.00689419	0.000765539	3.06706	2.66986	2.3602	-0.12628	0.00136982	3.7931e-05	-0.00341706	3.58586	4.08586	-0.00444217
2.21444	0.273779	0.00685233	0.000757222	3.04995	2.66921	2.36074	0.12628	0.00142737	0.0496078	-0.00347508	3.56906	4.06906	-0.00451761
2.2156	0.273633	0.00681341	0.000752545	3.03278	2.66855	2.36127	-0.12628	0.00142867	0.00112414	-0.00355702	3.55234	4.05234	-0.00462412
2.21676	0.273926	0.00678235	0.000756456	3.01593	2.6679	2.36181	0.252559	0.0014875	0.0507164	-0.00364106	3.53596	4.03596	-0.00473338
2.21792	0.273486	0.0067619	0.000771706	2.99961	2.66724	2.36235	-0.378839	0.00143324	-0.046781	-0.00374959	3.52024	4.02024	-0.00487447
2.21908	0.274805	0.00672922	0.000774381	2.98248	2.66659	2.36289	1.13652	0.00155027	0.100889	-0.00383874	3.50359	4.00359	-0.00499036
2.22024	0.273633	0.0066832	0.000763659	2.96432	2.66593	2.36343	-1.01024	0.00115604	-0.339849	-0.00397506	3.48618	3.98618	-0.00516758
2.2214	0.273779	0.00663509	0.000751082	2.9459	2.66527	2.36397	0.12628	0.00121741	0.0529017	-0.00396009	3.46768	3.96768	-0.00514811
2.22256	0.273926	0.00658928	0.000740768	2.92767	2.66462	2.36451	0.12628	0.00122244	0.00433707	-0.00397072	3.44951	3.94951	-0.00516194
2.22372	0.271875	0.00654958	0.000737387	2.90958	2.66396	2.36505	-1.76791	0.00117114	-0.0442259	-0.0039851	3.4315	3.9315	-0.00518064
2.22488	0.27627	0.00651982	0.000744511	2.89205	2.6633	2.36559	3.78839	0.00191674	0.642758	-0.00398136	3.41395	3.91395	-0.00517577
2.22604	0.274805	0.00649424	0.000745373	2.87914	2.66264	2.36614	-1.2628	0.000956685	-0.827632	-0.00426894	3.40262	3.90262	-0.00554962
2.2272	0.273633	0.00645548	0.000733099	2.86518	2.66199	2.36668	-1.01024	0.000565901	-0.336883	-0.00418563	3.3882	3.8882	-0.00544132
2.22836	0.270557	0.0064126	0.000717031	2.85077	2.66133	2.36722	-2.65187	0.000630443	0.0556397	-0.00395246	3.3725	3.8725	-0.0051382
2.22952	0.273047	0.00637054	0.000702386	2.83616	2.66067	2.36776	2.14675	0.00188983	1.08568	-0.00374613	3.35677	3.85677	-0.00486997
2.23068	0.274219	0.00633395	0.000693557	2.82185	2.66001	2.3683	1.01024	0.00218304	0.25277	-0.00403054	3.34402	3.84402	-0.0052397
2.23184	0.273486	0.00630611	0.000694389	2.80785	2.65935	2.36885	-0.631398	0.00202217	-0.138685	-0.00443063	3.33221	3.83221	-0.00575982
2.233	0.275098	0.00628976	0.000707082	2.79459	2.65869	2.36939	1.38908	0.00214662	0.10729	-0.00477024	3.32083	3.82083	-0.00620132
2.23416	0.273779	0.00626152	0.000706896	2.78082	2.65803	2.36993	-1.13652	0.00164632	-0.431293	-0.00516033	3.3092	3.8092	-0.00670844
2.23532	0.272461	0.0062233	0.000699606	2.76507	2.65737	2.37048	-1.13652	0.00165872	0.0106862	-0.00535847	3.29454	3.79454	-0.00696601
2.23648	0.273486	0.00618554	0.000693457	2.74908	2.65671	2.37102	0.883957	0.00218382	0.452672	-0.00556383	3.27968	3.77968	-0.00723298
2.23764	0.274219	0.00615371	0.000693393	2.73349	2.65605	2.37157	0.631398	0.00231172	0.110254	-0.00597561	3.26635	3.76635	-0.0077683
2.2388	0.273926	0.00613028	0.000703266	2.71793	2.65539	2.37211	-0.252559	0.00215623	-0.134037	-0.00643975	3.25334	3.75334	-0.00837168
2.23996	0.272754	0.00611771	0.000724728	2.70292	2.65472	2.37265	-1.01024	0.00211549	-0.0351241	-0.00684641	3.24057	3.74057	-0.00890033
2.24112	0.273926	0.0060929	0.000733045	2.68732	2.65406	2.3732	1.01024	0.00253077	0.358	-0.00724033	3.22714	3.72714	-0.00941243
2.24228	0.2729	0.00605914	0.000735095	2.66991	2.6534	2.37375	-0.883957	0.00249212	-0.0333198	-0.00779878	3.2128	3.7128	-0.0101384
2.24344	0.272314	0.00602521	0.000736651	2.65262	2.65274	2.37429	-0.505119	0.00285278	0.310913	-0.00834573	3.19852	3.69852	-0.0108495
2.2446	0.273047	0.00599604	0.000742113	2.63606	2.65207	2.37484	0.631398	0.00344226	0.508172	-0.0090365	3.18576	3.68576	-0.0117474
2.24576	0.274072	0.00597602	0.000756159	2.62045	2.65141	2.37538	0.883957	0.00374887	0.264319	-0.00996024	3.17523	3.67523	-0.0129483
2.24692	0.273779	0.00596624	0.000781542	2.60519	2.65075	2.37593	-0.252559	0.00365898	-0.0774897	-0.0110075	3.16573	3.66573	-0.0143098
2.24808	0.275391	0.00594333	0.000794082	2.58878	2.65008	2.37648	1.38908	0.00368451	0.0220078	-0.0120249	3.15492	3.65492	-0.0156324
2.24924	0.27334	0.00591057	0.000797357	2.57136	2.64942	2.37702	-1.76791	0.00308597	-0.515978	-0.0130576	3.14318	3.64318	-0.0169748
2.2504	0.2729	0.00587702	0.000800166	2.55375	2.64875	2.37757	-0.378839	0.0032852	0.171749	-0.0138637	3.13	3.63	-0.0180228
2.25156	0.274072	0.00584653	0.000806361	2.53623	2.64809	2.37812	1.01024	0.00365656	0.320139	-0.0147535	3.11738	3.61738	-0.0191795
2.25272	0.27832	0.00582319	0.000820618	2.51891	2.64742	2.37866	3.66211	0.0035745	-0.0707431	-0.0157941	3.10577	3.60577	-0.0205323
2.25388	0.27832	0.00581085	0.000845692	2.50252	2.64676	2.37921	0	0.00184441	-1.49145	-0.0168099	3.09498	3.59498	-0.0218529
2.25504	0.276123	0.00579657	0.00086235	2.48866	2.64609	2.37976	-1.89419	0.00011516	-1.49074	-0.0171615	3.08304	3.58304	-0.0223099
2.2562	0.273779	0.00576854	0.00086565	2.47354	2.64542	2.38031	-2.02047	-0.000760784	-0.755124	-0.0168493	3.06621	3.56621	-0.0219041
2.25736	0.275684	0.00573855	0.00086714	2.45822	2.64476	2.38086	1.64164	-0.000726929	0.0291853	-0.0162045	3.04734	3.54734	-0.0210659
2.25852	0.273193	0.00571128	0.000870946	2.44327	2.64409	2.38141	-2.14675	-0.00143289	-0.608589	-0.0155802	3.02896	3.52896	-0.0202543
2.25968	0.273047	0.00569028	0.000881194	2.42874	2.64342	2.38196	-0.12628	-0.00117247	0.224498	-0.0146887	3.00953	3.50953	-0.0190954
2.26084	0.27334	0.00567856	0.000900912	2.41487	2.64276	2.38251	0.252559	-0.0008557	0.273081	-0.013905	2.99135	3.49135	-0.0180766
2.262	0.272607	0.00566596	0.000920212	2.40073	2.64209	2.38305	-0.631398	-0.00065308	0.174672	-0.0132506	2.97361	3.47361	-0.0172258
2.26316	0.273779	0.00564063	0.000925904	2.38596	2.64142	2.3836	1.01024	-0.000166335	0.419608	-0.0126808	2.95571	3.45571	-0.0164851
2.26432	0.27085	0.00560752	0.000925416	2.36992	2.64075	2.38415	-2.52559	-0.000134735	0.0272414	-0.0123058	2.9376	3.4376	-0.0159975
2.26548	0.274805	0.00557652	0.000926169	2.3544	2.64008	2.38471	3.40955	0.00103448	1.00794	-0.0119486	2.92011	3.42011	-0.0155331
2.26664	0.2729	0.0055509	0.000933389	2.33885	2.63941	2.38526	-1.64164	0.000668299	-0.315674	-0.0120508	2.90513	3.40513	-0.015666
2.2678	0.273926	0.00553395	0.000949553	2.32388	2.63874	2.38581	0.883958	0.00104191	0.322077	-0.0120162	2.88997	3.38997	-0.015621
2.26896	0.273047	0.00551633	0.000965046	2.30885	2.63808	2.38636	-0.757678	0.0010178	-0.0207836	-0.0121321	2.87558	3.37558	-0.0157717
2.27012	0.271875	0.00548646	0.000967776	2.29307	2.63741	2.38691	-1.01024	0.00133545	0.273839	-0.0122441	2.86042	3.36042	-0.0159173
2.27128	0.273486	0.00544848	0.00096242	2.27664	2.63673	2.38746	1.38908	0.00210878	0.66666	-0.012485	2.84531	3.34531	-0.0162305
2.27244	0.276562	0.00541059	0.000957223	2.2602	2.63606	2.38801	2.65187	0.00225733	0.128063	-0.0130318	2.83187	3.33187	-0.0169413
2.2736	0.274072	0.00537719	0.000957131	2.24385	2.63539	2.38856	-2.14675	0.00121234	-0.900855	-0.0136422	2.81888	3.31888	-0.0177348
2.27476	0.274072	0.00535212	0.000965994	2.22789	2.63472	2.38912	0	0.00113492	-0.0667414	-0.0138529	2.80408	3.30408	-0.0180088
2.27592	0.275977	0.00532765	0.000974743	2.21229	2.63405	2.38967	1.64164	0.00105801	-0.0663	-0.0140398	2.7895	3.2895	-0.0182517
2.27708	0.272607	0.00530214	0.000975683	2.19938	2.63338	2.39022	-2.90443	0.000242089	-0.703381	-0.0142031	2.7775	3.2775	-0.0184641
2.27824	0.275391	0.00526869	0.000968265	2.18603	2.63271	2.39078	2.39931	0.000734605	0.424583	-0.014056	2.76333	3.26333	-0.0182728
2.2794	0.273926	0.00523389	0.000959634	2.17251	2.63204	2.39133	-1.2628	0.000146658	-0.506851	-0.0141065	2.7501	3.2501	-0.0183385
2.28056	0.274512	0.00520213	0.00095446	2.15906	2.63136	2.39188	0.505119	0.000127616	-0.0164155	-0.0139351	2.7357	3.2357	-0.0181156
2.28172	0.273047	0.0051775	0.000957415	2.14576	2.63069	2.39244	-1.2628	-0.000118904	-0.212517	-0.0137625	2.72145	3.22145	-0.0178912
2.28288	0.273633	0.00516304	0.000966575	2.13489	2.63002	2.39299	0.505119	0.000203361	0.277815	-0.0135004	2.70914	3.20914	-0.0175505
2.28404	0.275098	0.00514745	0.000974796	2.12385	2.62934	2.39354	1.2628	0.000298182	0.0817422	-0.0133695	2.69738	3.19738	-0.0173803
2.2852	0.274072	0.00512275	0.000974384	2.1119	2.62867	2.3941	-0.883957	-0.000175701	-0.40852	-0.0132814	2.68495	3.18495	-0.0172658
2.28636	0.274512	0.00509224	0.000968913	2.09919	2.628	2.39465	0.378839	-0.000251476	-0.0653233	-0.0130153	2.67077	3.17077	-0.0169199
2.28752	0.27334	0.00506415	0.000966077	2.08657	2.62732	2.39521	-1.01024	-0.000498016	-0.212534	-0.0127257	2.65657	3.15657	-0.0165434
2.28868	0.27334	0.00504231	0.000969452	2.07447	2.62665	2.39576	0	-0.000289709	0.179575	-0.012346	2.64237	3.14237	-0.0160498
2.28984	0.273486	0.00503002	0.000982611	2.06302	2.62597	2.39632	0.12628	-8.15331e-05	0.179491	-0.0120528	2.62931	3.12931	-0.0156687
2.291	0.273486	0.00501627	0.000995113	2.05112	2.6253	2.39687	0	6.97225e-05	0.130345	-0.0118459	2.61628	3.11628	-0.0153997
2.29216	0.273633	0.00499006	0.000997067	2.03746	2.62462	2.39743	0.12628	0.000221009	0.130439	-0.011703	2.60183	3.10183	-0.015214
2.29332	0.273193	0.00495715	0.000992047	2.02338	2.62395	2.39799	-0.378839	0.000315512	0.0814681	-0.0116242	2.58731	3.08731	-0.0151115
2.29448	0.274072	0.0049255	0.000987749	2.00962	2.62327	2.39854	0.757678	0.000580809	0.228704	-0.0115873	2.57335	3.07335	-0.0150635
2.29564	0.273926	0.00489922	0.000989121	1.99616	2.6226	2.3991	-0.12628	0.000505063	-0.0652983	-0.0116586	2.56028	3.06028	-0.0151562
2.2968	0.273779	0.00488076	0.000999186	1.98296	2.62192	2.39966	-0.12628	0.000486429	-0.0160638	-0.0117058	2.54734	3.04734	-0.0152176
2.29796	0.273926	0.00486078	0.00100833	1.96939	2.62124	2.40021	0.12628	0.000524899	0.0331638	-0.011751	2.53402	3.03402	-0.0152763
2.29912	0.273779	0.00484065	0.0010171	1.9559	2.62057	2.40077	-0.12628	0.00050672	-0.0156716	-0.0118165	2.52089	3.02089	-0.0153614
2.30028	0.273779	0.00481319	0.00101863	1.9418	2.61989	2.40133	0	0.000545654	0.0335638	-0.0118802	2.50714	3.00714	-0.0154442
2.30144	0.273633	0.00478445	0.00101925	1.92744	2.61921	2.40188	-0.12628	0.000584834	0.0337759	-0.0119644	2.49325	2.99325	-0.0155537
2.3026	0.273633	0.00475965	0.0010239	1.91336	2.61853	2.40244	0	0.000681161	0.0830405	-0.0120691	2.47974	2.97974	-0.0156899
2.30376	0.27334	0.00474233	0.00103671	1.89958	2.61786	2.403	-0.252559	0.000777794	0.0833043	-0.0122168	2.46678	2.96678	-0.0158818
2.30492	0.273193	0.00472288	0.00104751	1.88559	2.61718	2.40356	-0.12628	0.000988546	0.181683	-0.0124074	2.45383	2.95383	-0.0161296
2.30608	0.271143	0.00470293	0.00105768	1.87161	2.6165	2.40412	-1.76791	0.00125663	0.231104	-0.0126855	2.44138	2.94138	-0.0164912
2.30724	0.273486	0.00467643	0.00106036	1.8575	2.61582	2.40467	2.02047	0.00232165	0.918122	-0.0130734	2.42941	2.92941	-0.0169954
2.3084	0.274072	0.00464474	0.00105775	1.84303	2.61514	2.40523	0.505119	0.00247757	0.134418	-0.0138808	2.41938	2.91938	-0.018045
2.30956	0.274219	0.00461609	0.00105863	1.82861	2.61446	2.40579	0.12628	0.00240708	-0.0607707	-0.0147549	2.40976	2.90976	-0.0191814
2.31072	0.273633	0.00459404	0.00106687	1.8144	2.61378	2.40635	-0.505119	0.00228079	-0.108874	-0.0156084	2.40025	2.90025	-0.0202909
2.31188	0.273779	0.00457006	0.00107311	1.80006	2.6131	2.40691	0.12628	0.00238306	0.0881629	-0.0164198	2.39037	2.89037	-0.0213458
2.31304	0.275244	0.00454469	0.00107846	1.78541	2.61242	2.40747	1.2628	0.00242951	0.0400509	-0.0172784	2.38044	2.88044	-0.0224619
2.3142	0.278613	0.00451242	0.00107687	1.77024	2.61174	2.40803	2.90443	0.00190823	-0.449384	-0.0181627	2.37013	2.87013	-0.0236115
2.31536	0.273926	0.00447571	0.00106973	1.75517	2.61106	2.40859	-4.04095	7.94727e-05	-1.57649	-0.0188528	2.35886	2.85886	-0.0245087
2.31652	0.279199	0.00444115	0.00106498	1.74016	2.61038	2.40915	4.54607	7.10372e-05	-0.00732759	-0.0188413	2.34379	2.84379	-0.0244937
2.31768	0.274072	0.00441255	0.0010665	1.72551	2.6097	2.40971	-4.41979	-0.00198519	-1.77257	-0.018835	2.3291	2.8291	-0.0244854
[truncated: 15,243 more rows]
