# Supplementary material for: Effects of friction models on simulation of pneumatic cylinder
Source: Copernicus journal article supplement (doi:10.5194/ms-10-517-2019), 2019-10-30
Supplement: Supplementary file 4 [file Figure 12.xlsx]

## Sheet: Sheet1
tt	u1	u2	Experimental	Experimental	Experimental	Experimental	Experimental	SS model	SS model	SS model	SS model	SS model	LG model	LG model	LG model	LG model	LG model	RLG model	NMLG model	NMLG model	NMLG model	NMLG model
0	2.5	2.5	0.193652	0	0.0005	0.001	-2.51123	0.193652	0	0.0005	0.001	0	0.194	0	5e-05	5e-05	0	0.194	0	1e-06	1e-06	-8.23961
0.00116	2.50364	2.49691	0.193652	0	0.0005	0.001	-2.03947	0.193648	0.0138396	0.0005	0.001	10.5232	0.194	5.88093e-06	1e-06	1e-06	0.000366047	0.193997	-0.00461746	1e-06	1e-06	-8.11871
0.00232	2.50728	2.49382	0.193652	0	0.0005	0.001	-1.59612	0.193656	-0.00591193	0.0005	0.001	-13.7272	0.194	5.19912e-06	1e-06	1e-06	0.000376492	0.193989	-0.00890794	1e-06	1e-06	-7.99961
0.00348	2.51093	2.49073	0.193359	0	0.0005	0.001	-1.18014	0.193654	0.0172655	0.0005	0.001	9.9337	0.194	4.50177e-06	1e-06	1e-06	0.000379592	0.193977	-0.0128669	1e-06	1e-06	-7.88144
0.00464	2.51457	2.48764	0.193799	0	0.0005	0.001	-0.790448	0.193667	0.00364873	0.0005	0.001	15.5316	0.194	3.80489e-06	1e-06	1e-06	0.000376241	0.19396	-0.016492	1e-06	1e-06	-7.76319
0.0058	2.51821	2.48456	0.193945	0	0.0005	0.001	-0.424319	0.193683	0.00878486	0.0005	0.001	12.1359	0.194	3.1224e-06	1e-06	1e-06	0.000367344	0.193939	-0.0197839	1e-06	1e-06	-7.6438
0.00696	2.52185	2.48147	0.193652	0	0.0005	0.001	-0.0822333	0.193678	0.0118787	0.0005	0.001	11.0156	0.194	2.4661e-06	1e-06	1e-06	0.000353802	0.193914	-0.0227455	1e-06	1e-06	-7.52224
0.00812	2.52549	2.47838	0.193652	0	0.0005	0.001	0.235882	0.193682	0.0245246	0.0005	0.001	9.33101	0.194	1.84576e-06	1e-06	1e-06	0.000336492	0.193886	-0.0253825	1e-06	1e-06	-7.3976
0.00928	2.52912	2.4753	0.193506	0	0.0005	0.001	0.532888	0.193705	0.0145615	0.0005	0.001	10.3739	0.194	1.26913e-06	1e-06	1e-06	0.00031625	0.193855	-0.0277025	1e-06	1e-06	-7.26906
0.01044	2.53276	2.47222	0.193652	0	0.0005	0.001	0.810093	0.193714	-0.00460149	0.0005	0.001	-14.7004	0.194	7.42092e-07	1e-06	1e-06	0.000293865	0.193822	-0.029715	1e-06	1e-06	-7.13597
0.0116	2.53639	2.46913	0.193652	0	0.0005	0.001	1.06918	0.193713	0.0190422	0.0005	0.001	9.7244	0.194	2.68758e-07	1e-06	1e-06	0.000270063	0.193786	-0.0314313	1e-06	1e-06	-6.9978
0.01276	2.54002	2.46605	0.193799	0	0.0005	0.001	1.30978	0.193729	0.00620237	0.0005	0.001	13.5351	0.194	-1.46998e-07	1e-06	1e-06	0.00024118	0.193749	-0.0328635	1e-06	1e-06	-6.85417
0.01392	2.54365	2.46297	0.193799	0	0.0005	0.001	1.53286	0.193751	0.0143499	0.0005	0.001	10.4161	0.194	-4.85935e-07	1e-06	1e-06	0.000207648	0.19371	-0.0340247	1e-06	1e-06	-6.70482
0.01508	2.54728	2.4599	0.193066	0	0.0005	0.001	1.73876	0.193759	-0.00626402	0.0005	0.001	-13.4953	0.194	-7.51527e-07	1e-06	1e-06	0.000177927	0.19367	-0.0349287	1e-06	1e-06	-6.54963
0.01624	2.55091	2.45682	0.193799	0	0.0005	0.001	1.92763	0.193756	0.0154479	0.0005	0.001	10.2105	0.194	-9.52457e-07	1e-06	1e-06	0.000151873	0.193629	-0.0355893	1e-06	1e-06	-6.38854
0.0174	2.55453	2.45375	0.193652	0	0.0005	0.001	2.10571	0.193765	-0.00274465	0.0005	0.001	-16.4321	0.194	-1.09702e-06	1e-06	1e-06	0.000129301	0.193588	-0.0360206	1e-06	1e-06	-6.22162
0.01856	2.55815	2.45068	0.193799	0	0.0005	0.001	2.26892	0.193768	0.0221784	0.0005	0.001	9.46281	0.194	-1.19306e-06	1e-06	1e-06	0.00010999	0.193546	-0.0362365	1e-06	1e-06	-6.04899
0.01972	2.56176	2.44761	0.193506	0	0.0005	0.001	2.41856	0.193787	0.0105146	0.0005	0.001	11.4493	0.194	-1.24784e-06	1e-06	1e-06	9.37018e-05	0.193504	-0.0362505	1e-06	1e-06	-5.87084
0.02088	2.56538	2.44455	0.194531	0	0.0005	0.001	2.55478	0.193787	0.016485	0.0005	0.001	10.0438	0.194	-1.2681e-06	1e-06	1e-06	8.01807e-05	0.193462	-0.0360758	1e-06	1e-06	-5.68739
0.02204	2.56898	2.44149	0.193652	0	0.0005	0.001	2.68003	0.193798	-0.000422542	0.0005	0.001	-19.3556	0.194	-1.25995e-06	1e-06	1e-06	6.91674e-05	0.19342	-0.0357249	1e-06	1e-06	-5.49889
0.0232	2.57259	2.43843	0.193652	0	0.0005	0.001	2.78885	0.193805	0.0269881	0.0005	0.001	9.23281	0.194	-1.22891e-06	1e-06	1e-06	6.04024e-05	0.193379	-0.0352099	1e-06	1e-06	-5.30562
0.02436	2.57619	2.43538	0.194385	0	0.0005	0.001	2.88717	0.19383	0.0163389	0.0005	0.001	10.0658	0.194	-1.17989e-06	1e-06	1e-06	5.36317e-05	0.193338	-0.0345422	1e-06	1e-06	-5.10786
0.02552	2.57979	2.43232	0.193652	0	0.0005	0.001	2.97462	0.193841	-0.00132061	0.0005	0.001	-18.1088	0.194	-1.11724e-06	1e-06	1e-06	4.86104e-05	0.193299	-0.0337325	1e-06	1e-06	-4.9059
0.02668	2.58338	2.42928	0.193506	0	0.0005	0.001	3.04796	0.193845	0.0245193	0.0005	0.001	9.33126	0.194	-1.04474e-06	1e-06	1e-06	4.5106e-05	0.19326	-0.0327909	1e-06	1e-06	-4.70003
0.02784	2.58697	2.42623	0.193652	0	0.0005	0.001	3.11318	0.193867	0.0129887	0.0005	0.001	10.7201	0.194	-9.65657e-07	1e-06	1e-06	4.29003e-05	0.193223	-0.0317268	1e-06	1e-06	-4.49052
0.029	2.59056	2.42319	0.193945	0	0.0005	0.001	3.17222	0.193872	0.0255244	0.0005	0.001	9.28695	0.194	-8.82765e-07	1e-06	1e-06	4.17912e-05	0.193187	-0.0305489	1e-06	1e-06	-4.27765
0.03016	2.59414	2.42016	0.193799	0	0.0005	0.001	3.22355	0.193895	0.0140751	0.0005	0.001	10.4728	0.194	-7.98389e-07	1e-06	1e-06	4.15934e-05	0.193152	-0.0292655	1e-06	1e-06	-4.06169
0.03132	2.59771	2.41712	0.193652	0	0.0005	0.001	3.266	0.193902	0.0303405	0.0005	0.001	9.14421	0.194	-7.14446e-07	1e-06	1e-06	4.21388e-05	0.193119	-0.027884	1e-06	1e-06	-3.84287
0.03248	2.60128	2.4141	0.192773	0	0.0005	0.001	3.29902	0.193931	0.0195501	0.0005	0.001	9.6737	0.194	-6.32481e-07	1e-06	1e-06	4.32767e-05	0.193087	-0.0264114	1e-06	1e-06	-3.62146
0.03364	2.60485	2.41107	0.193799	0	0.0005	0.001	3.32492	0.193946	0.0048973	0.0005	0.001	14.4645	0.194	-5.53711e-07	1e-06	1e-06	4.48732e-05	0.193058	-0.024854	1e-06	1e-06	-3.39767
0.0348	2.6084	2.40805	0.193652	0	0.0005	0.001	3.35008	0.193963	0.00910721	0.0005	0.001	11.9948	0.194	-4.7906e-07	1e-06	1e-06	4.6811e-05	0.19303	-0.0232176	1e-06	1e-06	-3.17174
0.03596	2.61196	2.40504	0.193652	0	0.0005	0.001	3.36837	0.193957	0.00905199	0.0005	0.001	12.0185	0.194	-4.09199e-07	1e-06	1e-06	4.89881e-05	0.193004	-0.0215074	1e-06	1e-06	-2.94389
0.03712	2.6155	2.40203	0.193799	0	0.0005	0.001	3.38141	0.193951	0.00869928	0.0005	0.001	12.1745	0.194	-3.44579e-07	1e-06	1e-06	5.13171e-05	0.19298	-0.0197281	1e-06	1e-06	-2.71432
0.03828	2.61904	2.39903	0.193652	0	0.0005	0.001	3.38994	0.19398	0.0188406	0.0005	0.001	9.74556	0.194	-2.85465e-07	1e-06	1e-06	5.37242e-05	0.192958	-0.017884	1e-06	1e-06	-2.48325
0.03944	2.62258	2.39603	0.193652	0	0.0005	0.001	3.39368	0.193993	0.00286633	0.0005	0.001	16.304	0.194	-2.31965e-07	1e-06	1e-06	5.61481e-05	0.192938	-0.0159786	1e-06	1e-06	-2.25085
0.0406	2.62611	2.39304	0.193652	0	0.0005	0.001	3.39258	0.194006	0.00406913	0.0005	0.001	15.1509	0.194	-1.84057e-07	1e-06	1e-06	5.85386e-05	0.192921	-0.0140153	1e-06	1e-06	-2.01726
0.04176	2.62963	2.39005	0.193652	0	0.0005	0.001	3.38719	0.194021	0.00660391	0.0005	0.001	13.2823	0.194	-1.41615e-07	1e-06	1e-06	6.08555e-05	0.192906	-0.011997	1e-06	1e-06	-1.78259
0.04292	2.63314	2.38707	0.193799	0	0.0005	0.001	3.37966	0.194042	0.0125137	0.0005	0.001	10.8408	0.194	-1.04432e-07	1e-06	1e-06	6.3068e-05	0.192893	-0.00992658	1e-06	1e-06	-1.5468
0.04408	2.63665	2.3841	0.193506	0	0.0005	0.001	3.36735	0.194045	0.0206203	0.0005	0.001	9.57818	0.194	-7.22365e-08	1e-06	1e-06	6.51527e-05	0.192883	-0.00780689	1e-06	1e-06	-1.30974
0.04524	2.64015	2.38113	0.192041	0	0.0005	0.001	3.35052	0.194061	0.0056021	0.0005	0.001	13.9411	0.194	-4.47123e-08	1e-06	1e-06	6.70933e-05	0.192875	-0.00564147	1e-06	1e-06	-1.07106
0.0464	2.64364	2.37817	0.193359	0	0.0005	0.001	3.33171	0.194079	0.0098153	0.0005	0.001	11.7066	0.194	-2.15122e-08	1e-06	1e-06	6.88794e-05	0.19287	-0.00347459	1e-06	1e-06	-0.934164
0.04756	2.64713	2.37521	0.193799	0	0.0005	0.001	3.31952	0.194075	0.0103415	0.0005	0.001	11.5106	0.194	-2.27035e-09	1e-06	1e-06	7.05055e-05	0.192867	-0.00134799	1e-06	1e-06	-0.898821
0.04872	2.65061	2.37226	0.193066	0	0.0005	0.001	3.30576	0.194072	0.0122463	0.0005	0.001	10.9125	0.194	1.38063e-08	1e-06	1e-06	7.15953e-05	0.192867	0.000696801	1e-06	1e-06	-0.867202
0.04988	2.65407	2.36932	0.193213	0	0.0005	0.001	3.28804	0.194074	0.0194041	0.0005	0.001	9.68789	0.194	2.74825e-08	1e-06	1e-06	7.26106e-05	0.192869	0.00267974	1e-06	1e-06	-0.841438
0.05104	2.65754	2.36638	0.193799	0	0.0005	0.001	3.27086	0.194088	0.00341886	0.0005	0.001	15.7496	0.194	3.88277e-08	1e-06	1e-06	7.36019e-05	0.192873	0.00459854	1e-06	1e-06	-0.811949
0.0522	2.66099	2.36345	0.193652	0	0.0005	0.001	3.25406	0.194101	0.00494669	0.0005	0.001	14.4261	0.194	4.79178e-08	1e-06	1e-06	7.45524e-05	0.192879	0.00644455	1e-06	1e-06	-0.778725
0.05336	2.66443	2.36053	0.193652	0	0.0005	0.001	3.2347	0.194118	0.00837436	0.0005	0.001	12.3253	0.194	5.48639e-08	1e-06	1e-06	7.54483e-05	0.192888	0.00820941	1e-06	1e-06	-0.742041
0.05452	2.66787	2.35762	0.191309	0	0.0005	0.001	3.21296	0.194145	0.0172015	0.0005	0.001	9.94227	0.194	5.98059e-08	1e-06	1e-06	7.62788e-05	0.192898	0.00988541	1e-06	1e-06	-0.702166
0.05568	2.67129	2.35471	0.193945	0	0.0005	0.001	3.18906	0.194156	-0.00157323	0.0005	0.001	-17.7859	0.194	6.29053e-08	1e-06	1e-06	7.70358e-05	0.192911	0.0114655	1e-06	1e-06	-0.659413
0.05684	2.67471	2.35181	0.193945	0	0.0005	0.001	3.17856	0.19416	0.0223165	0.0005	0.001	9.45377	0.194	6.43398e-08	1e-06	1e-06	7.77136e-05	0.192925	0.0129434	1e-06	1e-06	-0.614131
0.058	2.67812	2.34892	0.193652	0	0.0005	0.001	3.16392	0.194178	0.0085321	0.0005	0.001	12.2512	0.194	6.42974e-08	1e-06	1e-06	7.83089e-05	0.192941	0.0143137	1e-06	1e-06	-0.566698
0.05916	2.68152	2.34604	0.193652	0	0.0005	0.001	3.14533	0.194205	0.0177569	0.0005	0.001	9.8704	0.194	6.2971e-08	1e-06	1e-06	7.88205e-05	0.192958	0.0155718	1e-06	1e-06	-0.517514
0.06032	2.68491	2.34317	0.193652	0	0.0005	0.001	3.12556	0.194217	-1.44732e-05	0.0005	0.001	-19.9773	0.194	6.05543e-08	1e-06	1e-06	7.92491e-05	0.192977	0.0167141	1e-06	1e-06	-0.466988
0.06148	2.68829	2.3403	0.193652	0	0.0005	0.001	3.10522	0.194224	0.0259953	0.0005	0.001	9.26828	0.194	5.72378e-08	1e-06	1e-06	7.95969e-05	0.192997	0.0177381	1e-06	1e-06	-0.415535
0.06264	2.69166	2.33744	0.193945	0	0.0005	0.001	3.08321	0.194247	0.013646	0.0005	0.001	10.5659	0.194	5.3205e-08	1e-06	1e-06	7.98674e-05	0.193018	0.0186421	1e-06	1e-06	-0.363563
0.0638	2.69501	2.33459	0.193799	0	0.0005	0.001	3.05997	0.194252	0.0258566	0.0005	0.001	9.27365	0.194	4.863e-08	1e-06	1e-06	8.00653e-05	0.19304	0.0194252	1e-06	1e-06	-0.311467
0.06496	2.69836	2.33175	0.193799	0	0.0005	0.001	3.03285	0.194275	0.0135154	0.0005	0.001	10.5954	0.194	4.36751e-08	1e-06	1e-06	8.01959e-05	0.193063	0.0200878	1e-06	1e-06	-0.259621
0.06612	2.7017	2.32892	0.193799	0	0.0005	0.001	3.00345	0.19428	0.0253675	0.0005	0.001	9.29345	0.194	3.84892e-08	1e-06	1e-06	8.02656e-05	0.193086	0.0206306	1e-06	1e-06	-0.208374
0.06728	2.70503	2.3261	0.193652	0	0.0005	0.001	2.97261	0.194303	0.0129399	0.0005	0.001	10.7321	0.194	3.32062e-08	1e-06	1e-06	8.02807e-05	0.193111	0.0210556	1e-06	1e-06	-0.158045
0.06844	2.70835	2.32329	0.193652	0	0.0005	0.001	2.94077	0.194306	0.0229244	0.0005	0.001	9.41602	0.194	2.79449e-08	1e-06	1e-06	8.02481e-05	0.193135	0.0213652	1e-06	1e-06	-0.108922
0.0696	2.71165	2.32048	0.193652	0	0.0005	0.001	2.90865	0.194326	0.00967431	0.0005	0.001	11.7617	0.194	2.28077e-08	1e-06	1e-06	8.01747e-05	0.19316	0.0215625	1e-06	1e-06	-0.0612584
0.07076	2.71495	2.31769	0.193652	0	0.0005	0.001	2.87581	0.194321	0.0104716	0.0005	0.001	11.4644	0.194	1.78818e-08	1e-06	1e-06	8.00672e-05	0.193185	0.0216511	1e-06	1e-06	-0.0152721
0.07192	2.71823	2.3149	0.193652	0	0.0005	0.001	2.84406	0.194319	0.0134007	0.0005	0.001	10.6217	0.194	1.32382e-08	1e-06	1e-06	7.99323e-05	0.19321	0.0216351	1e-06	1e-06	0.0288515
0.07308	2.7215	2.31213	0.193652	0	0.0005	0.001	2.81124	0.194324	0.0252247	0.0005	0.001	9.2995	0.194	8.93352e-09	1e-06	1e-06	7.97762e-05	0.193235	0.0215191	1e-06	1e-06	0.0709598
0.07424	2.72476	2.30936	0.191455	0	0.0005	0.001	2.7783	0.194346	0.0129214	0.0005	0.001	10.7367	0.194	5.00984e-09	1e-06	1e-06	7.96047e-05	0.19326	0.0213078	1e-06	1e-06	0.110932
0.0754	2.72801	2.30661	0.19585	0	0.0005	0.001	2.74444	0.19435	0.0232196	0.0005	0.001	9.39884	0.194	1.49631e-09	1e-06	1e-06	7.94234e-05	0.193285	0.0210064	1e-06	1e-06	0.148674
0.07656	2.73124	2.30387	0.195557	0	0.0005	0.001	2.72618	0.19437	0.0102823	0.0005	0.001	11.532	0.194	-1.56179e-09	1e-06	1e-06	7.9192e-05	0.193309	0.0206201	1e-06	1e-06	0.18412
0.07772	2.73447	2.30113	0.193506	0	0.0005	0.001	2.69347	0.194367	0.012963	0.0005	0.001	10.7264	0.194	-4.03282e-09	1e-06	1e-06	7.8943e-05	0.193333	0.0201543	1e-06	1e-06	0.217226
0.07888	2.73768	2.29841	0.193799	0	0.0005	0.001	2.64866	0.194371	0.0236126	0.0005	0.001	9.37707	0.194	-5.95963e-09	1e-06	1e-06	7.87227e-05	0.193356	0.0196144	1e-06	1e-06	0.247971
0.08004	2.74088	2.2957	0.193652	0	0.0005	0.001	2.60354	0.194392	0.0109327	0.0005	0.001	11.3073	0.194	-7.40749e-09	1e-06	1e-06	7.85299e-05	0.193378	0.0190059	1e-06	1e-06	0.276348
0.0812	2.74406	2.29299	0.193799	0	0.0005	0.001	2.55815	0.194391	0.0155353	0.0005	0.001	10.1955	0.194	-8.43866e-09	1e-06	1e-06	7.83632e-05	0.1934	0.0183343	1e-06	1e-06	0.302369
0.08236	2.74723	2.2903	0.193506	0	0.0005	0.001	2.51357	0.1944	-0.00570339	0.0005	0.001	-13.8702	0.194	-9.11173e-09	1e-06	1e-06	7.82208e-05	0.193421	0.017605	1e-06	1e-06	0.326057
0.08352	2.75039	2.28762	0.194238	0	0.0005	0.001	2.46963	0.194396	0.0146982	0.0005	0.001	10.3474	0.194	-9.48119e-09	1e-06	1e-06	7.81011e-05	0.193441	0.0168235	1e-06	1e-06	0.347444
0.08468	2.75354	2.28495	0.193652	0	0.0005	0.001	2.4275	0.194404	-0.00894205	0.0005	0.001	-12.0663	0.194	-9.59713e-09	1e-06	1e-06	7.8002e-05	0.19346	0.015995	1e-06	1e-06	0.366573
0.08584	2.75667	2.2823	0.193652	0	0.0005	0.001	2.38122	0.194394	0.008887	0.0005	0.001	12.0905	0.194	-9.50512e-09	1e-06	1e-06	7.79215e-05	0.193478	0.0151247	1e-06	1e-06	0.383491
0.087	2.75979	2.27965	0.193652	0	0.0005	0.001	2.33399	0.194388	0.00833749	0.0005	0.001	12.3429	0.194	-9.24615e-09	1e-06	1e-06	7.78577e-05	0.193495	0.0142176	1e-06	1e-06	0.39825
0.08816	2.7629	2.27702	0.193799	0	0.0005	0.001	2.28661	0.194415	0.0181387	0.0005	0.001	9.82419	0.194	-8.85675e-09	1e-06	1e-06	7.78087e-05	0.193511	0.0132788	1e-06	1e-06	0.410906
0.08932	2.76599	2.2744	0.193799	0	0.0005	0.001	2.2395	0.194428	0.00193217	0.0005	0.001	17.3467	0.194	-8.36905e-09	1e-06	1e-06	7.77727e-05	0.193525	0.012313	1e-06	1e-06	0.421516
0.09048	2.76906	2.27179	0.193506	0	0.0005	0.001	2.19008	0.194439	0.00247408	0.0005	0.001	16.725	0.194	-7.81106e-09	1e-06	1e-06	7.77479e-05	0.193539	0.0113248	1e-06	1e-06	0.430139
0.09164	2.77213	2.26919	0.193799	0	0.0005	0.001	2.13903	0.19445	0.00352757	0.0005	0.001	15.6456	0.194	-7.20685e-09	1e-06	1e-06	7.77326e-05	0.193552	0.010319	1e-06	1e-06	0.436832
0.0928	2.77518	2.2666	0.193506	0	0.0005	0.001	2.08932	0.194464	0.00570682	0.0005	0.001	13.8678	0.194	-6.57685e-09	1e-06	1e-06	7.77254e-05	0.193563	0.00929974	1e-06	1e-06	0.441654
0.09396	2.77821	2.26403	0.193506	0	0.0005	0.001	2.03994	0.194483	0.0106094	0.0005	0.001	11.4164	0.194	-5.93814e-09	1e-06	1e-06	7.77249e-05	0.193573	0.00827145	1e-06	1e-06	0.444662
0.09512	2.78123	2.26147	0.193506	0	0.0005	0.001	1.99438	0.194481	0.0138385	0.0005	0.001	10.5234	0.194	-5.30475e-09	1e-06	1e-06	7.77298e-05	0.193582	0.00723822	1e-06	1e-06	0.445913
0.09628	2.78423	2.25892	0.193652	0	0.0005	0.001	1.95249	0.194487	0.0268263	0.0005	0.001	9.23825	0.194	-4.68796e-09	1e-06	1e-06	7.7739e-05	0.19359	0.00620409	1e-06	1e-06	0.445463
0.09744	2.78722	2.25639	0.193652	0	0.0005	0.001	1.91016	0.194511	0.0146052	0.0005	0.001	10.3654	0.194	-4.09659e-09	1e-06	1e-06	7.77516e-05	0.193597	0.00517291	1e-06	1e-06	0.443366
0.0986	2.7902	2.25386	0.193652	0	0.0005	0.001	1.86673	0.194518	0.0300172	0.0005	0.001	9.15103	0.194	-3.53732e-09	1e-06	1e-06	7.77666e-05	0.193602	0.00414846	1e-06	1e-06	0.439678
0.09976	2.79315	2.25135	0.193652	0	0.0005	0.001	1.82295	0.194546	0.0181554	0.0005	0.001	9.82223	0.194	-3.01494e-09	1e-06	1e-06	7.77833e-05	0.193606	0.00313436	1e-06	1e-06	0.434454
0.10092	2.7961	2.24886	0.193652	0	0.0005	0.001	1.78009	0.194558	0.000426759	0.0005	0.001	19.3494	0.194	-2.53262e-09	1e-06	1e-06	7.7801e-05	0.193609	0.00213411	1e-06	1e-06	0.427747
0.10208	2.79902	2.24638	0.193652	0	0.0005	0.001	1.73917	0.194565	-0.00172092	0.0005	0.001	-17.6025	0.194	-2.09216e-09	1e-06	1e-06	7.78193e-05	0.193611	0.00115109	1e-06	1e-06	0.419614
0.10324	2.80193	2.24391	0.194824	0	0.0005	0.001	1.70115	0.194568	0.0214402	0.0005	0.001	9.51428	0.194	-1.6942e-09	1e-06	1e-06	7.78376e-05	0.193612	0.000188535	1e-06	1e-06	0.410111
0.1044	2.80483	2.24145	0.193359	0	0.0005	0.001	1.66161	0.194585	0.00644189	0.0005	0.001	13.3825	0.194	-1.33844e-09	1e-06	1e-06	7.78556e-05	0.193612	-0.000745131	1e-06	1e-06	0.394007
0.10556	2.80771	2.23901	0.193652	0	0.0005	0.001	1.61217	0.194605	0.0112341	0.0005	0.001	11.2101	0.194	-1.02383e-09	1e-06	1e-06	7.7873e-05	0.19361	-0.00163771	1e-06	1e-06	0.375446
0.10672	2.81057	2.23658	0.193359	0	0.0005	0.001	1.56371	0.194604	0.0142987	0.0005	0.001	10.4265	0.194	-7.48697e-10	1e-06	1e-06	7.78896e-05	0.193608	-0.00248601	1e-06	1e-06	0.355843
0.10788	2.81342	2.23417	0.193652	0	0.0005	0.001	1.51595	0.194609	0.0264255	0.0005	0.001	9.25229	0.194	-5.10937e-10	1e-06	1e-06	7.79052e-05	0.193605	-0.00328766	1e-06	1e-06	0.335261
0.10904	2.81625	2.23177	0.193652	0	0.0005	0.001	1.47198	0.194633	0.0131021	0.0005	0.001	10.6924	0.194	-3.08112e-10	1e-06	1e-06	7.79197e-05	0.1936	-0.00404056	1e-06	1e-06	0.313833
0.1102	2.81906	2.22938	0.193652	0	0.0005	0.001	1.4309	0.194636	0.0208161	0.0005	0.001	9.56224	0.194	-1.37564e-10	1e-06	1e-06	7.7933e-05	0.193595	-0.00474289	1e-06	1e-06	0.291682
0.11136	2.82186	2.22701	0.193799	0	0.0005	0.001	1.39109	0.194651	0.00463324	0.0005	0.001	14.6746	0.194	3.48643e-12	1e-06	1e-06	7.7945e-05	0.193589	-0.00539312	1e-06	1e-06	0.268944
0.11252	2.82464	2.22465	0.193652	0	0.0005	0.001	1.34981	0.194667	0.00636046	0.0005	0.001	13.4338	0.194	1.22006e-10	1e-06	1e-06	7.79528e-05	0.193583	-0.00599004	1e-06	1e-06	0.245759
0.11368	2.8274	2.22231	0.195117	0	0.0005	0.001	1.30319	0.194686	0.0102453	0.0005	0.001	11.5454	0.194	2.22655e-10	1e-06	1e-06	7.79604e-05	0.193575	-0.00653281	1e-06	1e-06	0.222276
0.11484	2.83014	2.21998	0.192334	0	0.0005	0.001	1.25677	0.194682	0.00967393	0.0005	0.001	11.7619	0.194	3.05741e-10	1e-06	1e-06	7.79679e-05	0.193568	-0.00702089	1e-06	1e-06	0.198645
0.116	2.83287	2.21767	0.193213	0	0.0005	0.001	1.2012	0.194675	0.00753532	0.0005	0.001	12.7487	0.194	3.71882e-10	1e-06	1e-06	7.7975e-05	0.193559	-0.00745413	1e-06	1e-06	0.175016
0.11716	2.83558	2.21537	0.193652	0	0.0005	0.001	1.15571	0.194698	0.0128468	0.0005	0.001	10.7553	0.194	4.21958e-10	1e-06	1e-06	7.79817e-05	0.19355	-0.00783269	1e-06	1e-06	0.151535
0.11832	2.83827	2.21309	0.193652	0	0.0005	0.001	1.11459	0.1947	0.0184476	0.0005	0.001	9.78861	0.194	4.57056e-10	1e-06	1e-06	7.79879e-05	0.193541	-0.00815708	1e-06	1e-06	0.128345
0.11948	2.84094	2.21082	0.193359	0	0.0005	0.001	1.07131	0.194712	-0.00134126	0.0005	0.001	-18.0819	0.194	4.78419e-10	1e-06	1e-06	7.79936e-05	0.193532	-0.00842814	1e-06	1e-06	0.105577
0.12064	2.8436	2.20857	0.193799	0	0.0005	0.001	1.02621	0.194715	0.0206423	0.0005	0.001	9.57637	0.194	4.87408e-10	1e-06	1e-06	7.79986e-05	0.193522	-0.00864699	1e-06	1e-06	0.0833528
0.1218	2.84623	2.20633	0.193945	0	0.0005	0.001	0.983375	0.19473	0.00320186	0.0005	0.001	15.9621	0.194	4.85453e-10	1e-06	1e-06	7.8003e-05	0.193512	-0.00881502	1e-06	1e-06	0.0617828
0.12296	2.84885	2.20411	0.192334	0	0.0005	0.001	0.940074	0.194741	0.00241423	0.0005	0.001	16.7913	0.194	4.74016e-10	1e-06	1e-06	7.80068e-05	0.193501	-0.00893387	1e-06	1e-06	0.0409643
0.12412	2.85145	2.20191	0.193799	0	0.0005	0.001	0.895765	0.194751	0.000680657	0.0005	0.001	18.9808	0.194	4.54562e-10	1e-06	1e-06	7.80099e-05	0.193491	-0.00900537	1e-06	1e-06	0.0209816
0.12528	2.85403	2.19972	0.193506	0	0.0005	0.001	0.866784	0.194757	-0.00300755	0.0005	0.001	-16.1581	0.194	4.28523e-10	1e-06	1e-06	7.80124e-05	0.193481	-0.00903155	1e-06	1e-06	0.00190571
0.12644	2.8566	2.19754	0.193213	0	0.0005	0.001	0.837428	0.194756	0.0166979	0.0005	0.001	10.0126	0.194	3.97279e-10	1e-06	1e-06	7.80144e-05	0.19347	-0.00901458	1e-06	1e-06	-0.0162053
0.1276	2.85914	2.19539	0.193799	0	0.0005	0.001	0.806953	0.194765	-0.0079983	0.0005	0.001	-12.5088	0.194	3.62133e-10	1e-06	1e-06	7.80158e-05	0.19346	-0.00895677	1e-06	1e-06	-0.0333059
0.12876	2.86167	2.19324	0.192773	0	0.0005	0.001	0.779023	0.194756	0.00717298	0.0005	1e-06	12.9479	0.194	3.24299e-10	1e-06	1e-06	7.80167e-05	0.19345	-0.00886048	1e-06	1e-06	-0.0493623
0.12992	2.86417	2.19112	0.193506	0	0.0005	0.001	0.750287	0.194776	0.0107317	0.0005	1e-06	11.3745	0.194	2.84885e-10	1e-06	1e-06	7.80172e-05	0.19344	-0.00872818	1e-06	1e-06	-0.0643514
0.13108	2.86666	2.18901	0.193066	0	0.0005	0.001	0.727943	0.194772	0.00925595	0.0005	1e-06	11.9318	0.194	2.44887e-10	1e-06	1e-06	7.80172e-05	0.193431	-0.00856236	1e-06	1e-06	-0.0782601
0.13224	2.86912	2.18692	0.193652	0	0.0005	0.001	0.707883	0.194799	0.0160014	0.0005	1e-06	10.1185	0.194	2.05183e-10	1e-06	1e-06	7.80169e-05	0.193421	-0.00836553	1e-06	1e-06	-0.0910842
0.1334	2.87157	2.18484	0.194092	0	0.0005	0.001	0.691542	0.194806	0.0291517	0.0005	1e-06	9.17091	0.194	1.66531e-10	1e-06	1e-06	7.80163e-05	0.193412	-0.0081402	1e-06	1e-06	-0.102827
0.13456	2.874	2.18278	0.193652	0	0.0005	0.001	0.673001	0.194832	0.0144475	0.0005	1e-06	10.3965	0.194	1.2957e-10	1e-06	1e-06	7.80155e-05	0.193403	-0.00788888	1e-06	1e-06	-0.113499
0.13572	2.87641	2.18074	0.193506	0	0.0005	0.001	0.648494	0.194836	0.02191	0.0005	1e-06	9.48089	0.194	9.48197e-11	1e-06	1e-06	7.80144e-05	0.193395	-0.00761402	1e-06	1e-06	-0.123115
0.13688	2.87879	2.17872	0.193799	0	0.0005	0.001	0.623817	0.194852	0.00403677	0.0005	1e-06	15.1794	0.194	6.26905e-11	1e-06	1e-06	7.80132e-05	0.193387	-0.00731806	1e-06	1e-06	-0.131697
0.13804	2.88116	2.17671	0.193652	0	0.0005	0.001	0.600828	0.194864	0.00301215	0.0005	1e-06	16.1534	0.194	3.34852e-11	1e-06	1e-06	7.80119e-05	0.193379	-0.00700337	1e-06	1e-06	-0.13927
0.1392	2.88351	2.17472	0.193506	0	0.0005	0.001	0.57869	0.194875	0.000795083	0.0005	1e-06	18.8189	0.194	7.40904e-12	1e-06	1e-06	7.80105e-05	0.193372	-0.00667225	1e-06	1e-06	-0.14586
0.14036	2.88583	2.17274	0.193652	0	0.0005	0.001	0.557083	0.19488	-0.00385086	0.0005	1e-06	-15.3457	0.194	-1.50329e-11	1e-06	1e-06	7.80087e-05	0.193366	-0.00632696	1e-06	1e-06	-0.151497
0.14152	2.88814	2.17079	0.193506	0	0.0005	0.001	0.534196	0.194878	0.0138675	0.0005	1e-06	10.5171	0.194	-3.30497e-11	1e-06	1e-06	7.80069e-05	0.19336	-0.00596966	1e-06	1e-06	-0.156215
0.14268	2.89043	2.16885	0.193652	0	0.0005	0.001	0.509332	0.19488	0.0186079	0.0005	1e-06	9.77076	0.194	-4.70277e-11	1e-06	1e-06	7.80052e-05	0.193354	-0.00560245	1e-06	1e-06	-0.160046
0.14384	2.89269	2.16693	0.193506	0.000712369	0.0005	0.001	0.485015	0.194891	-0.00408841	0.0005	1e-06	-15.1339	0.194	-5.74577e-11	1e-06	1e-06	7.80038e-05	0.193349	-0.00522735	1e-06	1e-06	-0.163023
0.145	2.89494	2.16502	0.193506	0.000737367	0.0005	0.001	0.461108	0.194888	0.0131563	0.0005	1e-06	10.6794	0.194	-6.48066e-11	1e-06	1e-06	7.80026e-05	0.193345	-0.0048463	1e-06	1e-06	-0.165182
0.14616	2.89716	2.16314	0.193652	0.0007633	0.0005	0.001	0.439404	0.194889	0.0155785	0.0005	1e-06	10.1881	0.194	-6.95129e-11	1e-06	1e-06	7.80015e-05	0.193341	-0.00446115	1e-06	1e-06	-0.166557
0.14732	2.89936	2.16127	0.193799	0.000629899	0.0005	0.001	0.418678	0.194895	0.0246962	0.0005	1e-06	9.32299	0.194	-7.19837e-11	1e-06	1e-06	7.80006e-05	0.193338	-0.00407369	1e-06	1e-06	-0.167184
0.14848	2.90154	2.15942	0.193799	0.000336995	0.0005	0.001	0.401819	0.194914	0.0075499	0.0005	1e-06	12.7409	0.194	-7.25928e-11	1e-06	1e-06	7.79999e-05	0.193335	-0.00368561	1.18892e-06	1e-06	-0.167023
0.14964	2.9037	2.15759	0.193652	4.45184e-05	0.0005	0.001	0.381702	0.194935	0.00996025	0.0005	1e-06	11.6512	0.194	-7.16795e-11	1e-06	1e-06	7.79993e-05	0.193333	-0.00329853	2.84455e-06	1e-06	-0.165605
0.1508	2.90584	2.15578	0.193652	-8.75985e-05	0.0005	0.001	0.359826	0.194962	0.0161901	0.0005	1e-06	10.0887	0.194	-6.95485e-11	1e-06	1e-06	7.79989e-05	0.193331	-0.00291398	6.13399e-06	1e-06	-0.162892
0.15196	2.90796	2.15398	0.193652	-0.000219827	0.0005	0.001	0.338683	0.194969	0.0265682	0.0005	1e-06	9.2472	0.194	-6.64709e-11	1e-06	1e-06	7.79985e-05	0.19333	-0.00253341	1.1041e-05	1e-06	-0.158918
0.15312	2.91005	2.1522	0.193945	-0.000352334	0.0005	0.001	0.318397	0.19499	0.00984023	0.0005	1e-06	11.697	0.194	4.64775e-07	2.13894e-06	1e-06	0.000106292	0.19333	-0.00215819	1.75491e-05	1e-06	-0.153717
0.15428	2.91213	2.15044	0.193359	-0.000805895	0.0005	0.001	0.298301	0.195017	0.0155202	0.0005	1e-06	10.1981	0.194	3.07791e-06	5.13863e-06	1e-06	0.000276722	0.19333	-0.00178963	2.56418e-05	1e-06	-0.147322
0.15544	2.91418	2.1487	0.194092	-0.000619266	0.0005	0.001	0.27592	0.195023	0.0231465	0.0005	1e-06	9.40303	0.194	9.46717e-06	9.97955e-06	1e-06	0.000714851	0.193331	-0.00142892	3.53026e-05	1e-06	-0.139767
0.1566	2.91621	2.14698	0.191748	-0.00123494	0.0005	0.001	0.253722	0.19504	0.00444108	0.0005	1e-06	14.8326	0.194	2.09521e-05	1.66421e-05	1e-06	0.00154138	0.193332	-0.00107719	4.65147e-05	1e-06	-0.131085
0.15776	2.91821	2.14528	0.19248	0.000712671	0.0005	0.001	0.226303	0.195052	0.00244669	0.0005	1e-06	16.7552	0.194	3.85575e-05	2.51066e-05	1e-06	0.00287015	0.193334	-0.000735511	5.92612e-05	1e-06	-0.12131
0.15892	2.9202	2.1436	0.193652	0.00185967	0.0005	0.001	0.20988	0.19506	-0.0017121	0.0005	1e-06	-17.6133	0.194	6.30311e-05	3.53532e-05	1e-06	0.00480657	0.193336	-0.000404834	7.35253e-05	1e-06	-0.110475
0.16008	2.92216	2.14193	0.193652	0.0017266	0.0005	0.001	0.201668	0.195061	0.0167708	0.0005	1e-06	10.0021	0.194	9.48648e-05	4.7362e-05	1e-06	0.00744637	0.193339	-8.60513e-05	8.92899e-05	1e-06	-0.0986142
0.16124	2.9241	2.14029	0.193652	0.00159573	0.0005	0.001	0.194696	0.195068	0.0275838	0.0005	1e-06	9.21381	0.194	0.000134318	6.1113e-05	1e-06	0.0108747	0.193343	0.00022143	0.000106538	1e-06	-0.0878185
0.1624	2.92602	2.13866	0.193652	0.00146688	0.0005	0.001	0.187188	0.195091	0.0105388	0.0005	1e-06	11.4409	0.194001	0.000181441	7.65862e-05	1e-06	0.0151658	0.193347	0.00051987	0.000125252	1e-06	-0.0760556
0.16356	2.92792	2.13705	0.192188	0.0013399	0.0005	0.001	0.178232	0.195083	0.00498843	0.0005	1e-06	14.3939	0.194001	0.000236105	9.37613e-05	1e-06	0.0203823	0.193351	0.000808494	0.000145415	1e-06	-0.0631869
0.16472	2.92979	2.13546	0.192773	0.00281764	0.0005	0.001	0.167098	0.195097	0.00311762	0.0005	1e-06	16.0464	0.194001	0.000298023	0.000112618	1e-06	0.0265757	0.193357	0.00108628	0.000167009	1e-06	-0.0492427
0.16588	2.93164	2.13389	0.193213	0.00365775	0.0005	0.001	0.165137	0.195106	-0.00080025	0.0005	1e-06	-18.8117	0.194001	0.000366781	0.000133136	1e-06	0.0337862	0.193362	0.00135229	0.000190018	1e-06	-0.0342549
0.16704	2.93347	2.13234	0.193652	0.0040216	0.0005	0.001	0.16892	0.195109	0.018207	0.0005	1e-06	9.81619	0.194002	0.00044186	0.000155295	1e-06	0.0420435	0.193369	0.00160564	0.000214422	1e-06	-0.0182517
0.1682	2.93527	2.13081	0.193799	0.00390964	0.0005	0.001	0.176316	0.195118	-0.00869097	0.0005	1e-06	-12.1782	0.194002	0.000522659	0.000179074	1e-06	0.0513669	0.193375	0.00184555	0.000240206	1e-06	-0.00127071
0.16936	2.93705	2.1293	0.193652	0.00364234	0.0005	0.001	0.183587	0.195105	0.00287977	0.0005	1e-06	16.29	0.194003	0.000608523	0.000204452	1e-06	0.0617666	0.193382	0.00207129	0.00026735	1e-06	0.0166531
0.17052	2.93881	2.12781	0.193652	0.00353996	0.0005	0.001	0.19037	0.195114	-0.00157239	0.0005	1e-06	-17.787	0.194004	0.000698758	0.000231409	1e-06	0.0732439	0.19339	0.00228226	0.000295837	1e-06	0.0354839
0.17168	2.94054	2.12634	0.193506	0.00344208	0.0005	0.001	0.195077	0.195114	0.0162751	0.0005	1e-06	10.0756	0.194005	0.000792653	0.000259924	1e-06	0.0857925	0.193398	0.00247789	0.00032565	1e-06	0.0551852
0.17284	2.94225	2.12489	0.193652	0.00350888	0.0005	0.001	0.198764	0.19512	0.0236399	0.0005	1e-06	9.3756	0.194006	0.000889495	0.000289976	1e-06	0.0993992	0.193406	0.00265774	0.00035677	1e-06	0.07572
0.174	2.94394	2.12346	0.193799	0.00341982	0.0005	0.001	0.203719	0.195137	0.00388347	0.0005	1e-06	15.3162	0.194007	0.000988586	0.000321544	1e-06	0.114045	0.193415	0.00282143	0.000389179	1e-06	0.0970511
0.17516	2.9456	2.12205	0.193506	0.0031748	0.0005	0.001	0.209804	0.195148	0.000167011	0.0005	1e-06	19.7407	0.194008	0.00108925	0.000354607	1e-06	0.129706	0.193424	0.00296866	0.000422859	1e-06	0.119141
0.17632	2.94725	2.12066	0.193359	0.00325442	0.0005	0.001	0.215263	0.195151	-0.00746215	0.0005	1e-06	-12.7881	0.194009	0.00119086	0.000389143	1e-06	0.146354	0.193433	0.00309922	0.000457792	1e-06	0.141953
0.17748	2.94886	2.11929	0.193506	0.00349847	0.0005	0.001	0.221663	0.19514	0.00465799	0.0005	1e-06	14.6546	0.194011	0.00129282	0.000425131	1e-06	0.163957	0.193443	0.00321299	0.00049396	1e-06	0.16545
0.17864	2.95045	2.11794	0.193506	0.00358666	0.0005	0.001	0.228051	0.195152	0.0015292	0.0005	1e-06	17.8413	0.194012	0.00139459	0.00046255	1e-06	0.182483	0.193453	0.00330992	0.000531343	1e-06	0.189595
0.1798	2.95202	2.1166	0.193652	0.00367941	0.0005	0.001	0.234305	0.195158	-0.00486012	0.0005	1e-06	-14.4936	0.194014	0.00149568	0.000501379	1e-06	0.201897	0.193464	0.00339003	0.000569926	1e-06	0.214352
0.18096	2.95357	2.11529	0.193652	0.00361652	0.0005	0.001	0.241847	0.195152	0.00928492	0.0005	1e-06	11.9197	0.194016	0.00159567	0.000541595	1e-06	0.222161	0.193474	0.00345342	0.000609687	1e-06	0.239686
0.18212	2.95509	2.114	0.193506	0.00355822	0.0005	0.001	0.250221	0.195176	0.0117011	0.0005	1e-06	11.0674	0.194018	0.0016942	0.000583178	1e-06	0.24324	0.193485	0.00350028	0.00065061	1e-06	0.265562
0.18328	2.95659	2.11273	0.193066	0.00366474	0.0005	0.001	0.258705	0.19517	0.00680967	0.0005	1e-06	13.1582	0.19402	0.00179094	0.000626105	1e-06	0.265099	0.193496	0.00353084	0.000692675	1e-06	0.291947
0.18444	2.95806	2.11149	0.192188	0.00425683	0.0005	0.001	0.268223	0.195187	0.00570558	0.0005	1e-06	13.8686	0.194022	0.00188565	0.000670355	1e-06	0.287702	0.193507	0.00354541	0.000735865	1e-06	0.318807
0.1856	2.95951	2.11026	0.19585	0.00581614	0.0005	0.001	0.28355	0.195201	0.00326316	0.0005	1e-06	15.9014	0.194024	0.00197815	0.000715906	1e-06	0.311016	0.193518	0.00354436	0.00078016	1e-06	0.346113
0.18676	2.96093	2.10905	0.196582	0.00337525	0.0005	0.001	0.307606	0.19521	-0.00178415	0.0005	1e-06	-17.5251	0.194026	0.00206827	0.000762736	1e-06	0.335007	0.19353	0.00352812	0.000825542	1e-06	0.373832
0.18792	2.96233	2.10786	0.193506	0.000137126	0.0005	0.001	0.31761	0.19521	0.0148147	0.0005	1e-06	10.3251	0.194029	0.00215593	0.000810824	1e-06	0.359647	0.193541	0.00349717	0.000871992	1e-06	0.401937
0.18908	2.9637	2.1067	0.193652	0.000265547	0.0005	0.001	0.310329	0.195212	0.0161725	0.0005	1e-06	10.0915	0.194031	0.00224107	0.000860146	1e-06	0.384905	0.193553	0.00345205	0.000919491	1e-06	0.4304
0.19024	2.96505	2.10555	0.193652	0.000234001	0.0005	0.001	0.304235	0.195217	0.0208953	0.0005	1e-06	9.55591	0.194034	0.00232368	0.000910681	1e-06	0.410755	0.193565	0.00339332	0.000968022	1e-06	0.459194
0.1914	2.96638	2.10443	0.193213	0.000202752	0.0005	0.001	0.298342	0.19523	-0.00324753	0.0005	1e-06	-15.9169	0.194037	0.00240379	0.000962408	1e-06	0.437173	0.193576	0.00332162	0.00101756	1e-06	0.488295
0.19256	2.96768	2.10332	0.194238	0.00065267	0.0005	0.001	0.290681	0.195226	0.0116452	0.0005	1e-06	11.084	0.19404	0.00248143	0.0010153	1e-06	0.464137	0.193588	0.00323761	0.0010681	1e-06	0.517679
0.19372	2.96896	2.10224	0.195117	-1.87053e-05	0.0005	0.001	0.284946	0.195221	0.00567303	0.0005	1e-06	13.8913	0.194043	0.0025567	0.00106934	1e-06	0.491625	0.1936	0.00314196	0.00111961	1e-06	0.547325
0.19488	2.97021	2.10118	0.192627	-0.00165192	0.0005	0.001	0.276084	0.195234	0.00262144	0.0005	1e-06	16.564	0.194046	0.00262967	0.00112451	1e-06	0.519621	0.193612	0.00303541	0.00117207	1e-06	0.577211
0.19604	2.97143	2.10014	0.192773	-0.000562085	0.0005	0.001	0.258648	0.195241	-0.0036	0.0005	1e-06	-15.5772	0.194049	0.00270046	0.00118078	1e-06	0.548107	0.193624	0.00291871	0.00122547	1e-06	0.60732
0.1972	2.97263	2.09912	0.193799	0.000366737	0.0005	0.001	0.247861	0.195238	0.0106959	0.0005	1e-06	11.3867	0.194052	0.00276919	0.00123812	1e-06	0.577068	0.193636	0.00279262	0.00127979	1e-06	0.637633
0.19836	2.97381	2.09813	0.193799	0.000173902	0.0005	0.001	0.243805	0.195264	0.0141829	0.0005	1e-06	10.4503	0.194055	0.00283599	0.00129652	1e-06	0.606491	0.193647	0.00265794	0.00133501	1e-06	0.668134
0.19952	2.97496	2.09715	0.193652	-1.87116e-05	0.0005	0.001	0.247342	0.195265	0.0130122	0.0005	1e-06	10.7143	0.194058	0.00290098	0.00135596	1e-06	0.636365	0.193659	0.00251545	0.0013911	1e-06	0.698809
0.20068	2.97609	2.09619	0.193506	-5.10461e-05	0.0005	0.001	0.24876	0.195262	0.0092608	0.0005	1e-06	11.9298	0.194062	0.0029643	0.00141641	1e-06	0.666678	0.193671	0.00236598	0.00144806	1e-06	0.729644
0.20184	2.97719	2.09526	0.193652	7.68577e-05	0.0005	0.001	0.250291	0.195284	0.0102009	0.0005	1e-06	11.5616	0.194065	0.00302607	0.00147784	1e-06	0.697422	0.193682	0.00221034	0.00150585	1e-06	0.760626
0.203	2.97826	2.09435	0.193945	4.45559e-05	0.0005	0.001	0.253691	0.195309	0.012502	0.0005	1e-06	10.8439	0.194069	0.00308641	0.00154025	1e-06	0.728588	0.193694	0.00204935	0.00156447	1e-06	0.791746
0.20416	2.97931	2.09346	0.193799	-0.000308296	0.0005	0.001	0.256859	0.195305	0.00738947	0.0005	1e-06	12.8277	0.194073	0.00314545	0.00160359	1e-06	0.760167	0.193705	0.00188383	0.00162389	1e-06	0.822993
0.20532	2.98034	2.09259	0.193213	-0.000501235	0.0005	0.001	0.258234	0.195322	0.00563441	0.0005	1e-06	13.9184	0.194076	0.00320329	0.00166786	1e-06	0.792152	0.193716	0.0017146	0.00168409	1e-06	0.854359
0.20648	2.98133	2.09174	0.193506	-5.35987e-05	0.0005	0.001	0.259938	0.195336	0.00184928	0.0005	1e-06	17.4462	0.19408	0.00326003	0.00173302	1e-06	0.824537	0.193728	0.00154247	0.00174506	1e-06	0.885837
0.20764	2.98231	2.09092	0.193652	7.33636e-05	0.0005	0.001	0.263013	0.195341	-0.00578629	0.0005	1e-06	-13.8128	0.194084	0.00331575	0.00179906	1e-06	0.857315	0.193739	0.00136836	0.00180677	1e-06	0.917419
0.2088	2.98326	2.09011	0.193359	4.01158e-05	0.0005	0.001	0.266369	0.195332	0.00590504	0.0005	1e-06	13.7319	0.194088	0.00337054	0.00186595	1e-06	0.890479	0.19375	0.00119322	0.00186921	1e-06	0.949102
0.20996	2.98418	2.08933	0.193652	0.000327525	0.0005	0.001	0.270464	0.195346	0.00220276	0.0005	1e-06	17.0302	0.194092	0.00342446	0.00193367	1e-06	0.924022	0.193761	0.00101796	0.00193235	1e-06	0.980881
0.21112	2.98507	2.08857	0.193506	0.000294744	0.0005	0.001	0.27615	0.195352	-0.00526736	0.0005	1e-06	-14.1832	0.194096	0.00347757	0.00200219	1e-06	0.957937	0.193771	0.000843482	0.00199618	1e-06	1.01275
0.21228	2.98594	2.08783	0.193652	0.00042264	0.0005	0.001	0.282313	0.195344	0.00668327	0.0005	1e-06	13.234	0.1941	0.00352991	0.0020715	1e-06	0.992219	0.193782	0.000670643	0.00206068	1e-06	1.04471
0.21344	2.98679	2.08712	0.193506	0.00039077	0.0005	0.001	0.290524	0.19536	0.00362015	0.0005	1e-06	15.5583	0.194104	0.00358153	0.00214156	1e-06	1.02686	0.193793	0.000500275	0.00212582	1e-06	1.07676
0.2146	2.98761	2.08642	0.193506	0.000519699	0.0005	0.001	0.298337	0.195368	-0.00264644	0.0005	1e-06	-16.5371	0.194108	0.00363244	0.00221236	1e-06	1.06185	0.193803	0.000333168	0.00219159	1e-06	1.10889
0.21576	2.9884	2.08575	0.193213	0.000649287	0.0005	0.001	0.30722	0.195366	0.0114902	0.0005	1e-06	11.1307	0.194112	0.00368266	0.00228388	1e-06	1.09719	0.193813	0.000170078	0.00225797	1e-06	1.14111
0.21692	2.98917	2.0851	0.193799	0.00110031	0.0005	0.001	0.318753	0.195358	0.00316973	0.0005	1e-06	15.9942	0.194117	0.0037322	0.00235608	1e-06	1.13286	0.193823	1.17194e-05	0.00232494	1e-06	1.17341
0.21808	2.98991	2.08447	0.193652	0.00091151	0.0005	0.001	0.333167	0.195365	-0.00372404	0.0005	1e-06	-15.4617	0.194121	0.00378107	0.00242895	1e-06	1.16886	0.193834	-0.000140145	0.00239248	1e-06	1.2058
0.21924	2.99062	2.08386	0.193506	0.000884173	0.0005	0.001	0.347374	0.195361	0.00921825	0.0005	1e-06	11.9476	0.194125	0.00382926	0.00250246	1e-06	1.20517	0.193843	-0.000283662	0.00246057	1e-06	1.23828
0.2204	2.99131	2.08328	0.193945	0.00101826	0.0005	0.001	0.363142	0.195382	0.0088417	0.0005	1e-06	12.1105	0.19413	0.00387675	0.0025766	1e-06	1.2418	0.193853	-0.000418396	0.00252918	1e-06	1.27084
0.22156	2.99198	2.08272	0.193213	0.000672734	0.0005	0.001	0.379027	0.195402	0.00788143	0.0005	1e-06	12.5679	0.194134	0.00392353	0.00265133	1e-06	1.27873	0.193863	-0.000544012	0.00259831	1e-06	1.30349
0.22272	2.99261	2.08218	0.193359	0.00112958	0.0005	0.001	0.393303	0.19542	0.00564056	0.0005	1e-06	13.9141	0.194139	0.00396959	0.00272663	1e-06	1.31594	0.193873	-0.000660233	0.00266792	1e-06	1.33624
0.22388	2.99322	2.08166	0.193799	0.00142755	0.0005	0.001	0.412311	0.195432	0.000867781	0.0005	1e-06	18.7175	0.194143	0.0040149	0.00280248	1e-06	1.35344	0.193882	-0.000766838	0.00273801	1e-06	1.36907
0.22504	2.99381	2.08116	0.193506	0.00124642	0.0005	0.001	0.433974	0.195435	-0.00869982	0.0005	1e-06	-12.1742	0.194148	0.00405943	0.00287886	1e-06	1.3912	0.193892	-0.00086366	0.00280854	1e-06	1.40201
0.2262	2.99437	2.08069	0.193945	0.00138749	0.0005	0.001	0.455165	0.19542	-0.000699352	0.0005	1e-06	-18.9541	0.194153	0.00410316	0.00295573	1e-06	1.42922	0.193901	-0.000950587	0.00287951	1e-06	1.43503
0.22736	2.9949	2.08024	0.193652	0.0010494	0.0005	0.001	0.479325	0.195421	0.0147908	0.0005	1e-06	10.3297	0.194158	0.00414607	0.00303309	1e-06	1.46749	0.19391	-0.00102756	0.00295088	1e-06	1.46816
0.22852	2.9954	2.07981	0.193652	0.00103326	0.0005	0.001	0.500907	0.195421	0.012188	0.0005	1e-06	10.9285	0.194163	0.00418811	0.00311091	1e-06	1.506	0.193919	-0.00109456	0.00302265	1e-06	1.5014
0.22968	2.99588	2.0794	0.194092	0.00101842	0.0005	0.001	0.52256	0.195415	0.00427866	0.0005	1e-06	14.9695	0.194167	0.00422927	0.00318915	1e-06	1.54473	0.193929	-0.00115164	0.00309479	1e-06	1.53473
0.23084	2.99634	2.07902	0.193945	0.000523973	0.00368393	0.001	0.546025	0.195424	-0.00222324	0.0005	1e-06	-17.0068	0.194172	0.00426951	0.0032678	1e-06	1.58367	0.193938	-0.00119886	0.00316727	1e-06	1.56818
0.232	2.99676	2.07866	0.194092	0.000190491	0.00368549	0.001	0.566543	0.195422	0.0114429	0.0005	1e-06	11.1451	0.194177	0.00430881	0.00334684	1e-06	1.62281	0.193947	-0.00123637	0.00324009	1e-06	1.60173
0.23316	2.99716	2.07832	0.193652	-0.000303053	0.00368707	0.001	0.586036	0.195449	0.0136161	0.0005	1e-06	10.5726	0.194182	0.00434714	0.00342624	1e-06	1.66214	0.193956	-0.00126432	0.00331321	1e-06	1.63539
0.23432	2.99754	2.078	0.193652	-0.000316072	0.00370415	0.001	0.605104	0.195446	0.00815886	0.0005	1e-06	12.4293	0.194187	0.00438448	0.00350598	1e-06	1.70164	0.193965	-0.00128292	0.00338663	1e-06	1.66917
0.23548	2.99789	2.0777	0.193799	-0.000329492	0.00374296	0.001	0.626512	0.195464	0.00547792	0.0005	1e-06	14.0296	0.194192	0.00442079	0.00358603	1e-06	1.74131	0.193973	-0.00129243	0.00346032	1e-06	1.70306
0.23664	2.99821	2.07743	0.193506	-0.000503634	0.00377101	0.001	0.647726	0.195476	-0.000163241	0.0005	1e-06	-19.7464	0.194198	0.00445606	0.00366637	1e-06	1.78113	0.193982	-0.00129311	0.00353425	1e-06	1.73706
0.2378	2.9985	2.07718	0.193506	-0.000357808	0.00380847	0.001	0.669389	0.195477	0.0153617	0.0005	1e-06	10.2255	0.194203	0.00449027	0.00374697	1e-06	1.82109	0.193991	-0.00128527	0.00360841	1e-06	1.77118
0.23896	2.99877	2.07695	0.194092	-0.000212437	0.00383681	0.001	0.691993	0.195478	0.0130013	0.0005	1e-06	10.717	0.194208	0.0045234	0.00382782	1e-06	1.86118	0.194	-0.00126925	0.00368279	1e-06	1.80542
0.24012	2.99901	2.07675	0.193652	-0.000708549	0.00386302	0.001	0.716432	0.195473	0.00586778	0.0005	1e-06	13.7571	0.194213	0.00455542	0.00390889	1e-06	1.90138	0.194009	-0.00124542	0.00375735	1e-06	1.83978
0.24128	2.99923	2.07657	0.193652	-0.00072465	0.00390109	0.001	0.739652	0.195486	0.000362511	0.0005	1e-06	19.4448	0.194219	0.00458632	0.00399015	1e-06	1.94169	0.194018	-0.00121416	0.00383208	1e-06	1.87425
0.24244	2.99942	2.07641	0.193652	-0.000741671	0.00396036	0.001	0.765622	0.195487	-0.0106475	0.0005	1e-06	-11.4032	0.194224	0.00461608	0.00407159	1e-06	1.98208	0.194027	-0.00117587	0.00390696	1e-06	1.90883
0.2436	2.99958	2.07627	0.193799	-0.000759634	0.00400837	0.001	0.791493	0.195467	-0.00587488	0.0005	1e-06	-13.7523	0.194229	0.00464469	0.00415317	1e-06	2.02256	0.194036	-0.00113097	0.00398196	1e-06	1.94354
0.24476	2.99972	2.07615	0.193799	-0.000938864	0.00405758	0.001	0.817308	0.195457	0.00375769	0.0005	1e-06	15.4307	0.194235	0.00467214	0.00423488	1e-06	2.0631	0.194045	-0.00107991	0.00405707	1e-06	1.97835
0.24592	2.99983	2.07606	0.193506	-0.00111929	0.00409642	0.001	0.842173	0.195465	-0.00404128	0.0005	1e-06	-15.1754	0.19424	0.0046984	0.00431668	1e-06	2.1037	0.194054	-0.00102314	0.00413227	1e-06	2.01328
0.24708	2.99991	2.07599	0.192334	-0.000980522	0.00413037	0.001	0.865901	0.195459	0.00712439	0.0005	1e-06	12.9754	0.194246	0.00472348	0.00439857	1e-06	2.14433	0.194063	-0.000961105	0.00420754	1e-06	2.04831
0.24824	2.99996	2.07594	0.193799	0.000439422	0.00417265	0.001	0.890521	0.195473	0.00253144	0.0005	1e-06	16.6619	0.194251	0.00474736	0.00448051	1e-06	2.185	0.194072	-0.000894285	0.00428285	1e-06	2.08345
0.2494	2.99999	2.07592	0.193652	0.000256893	0.0042357	0.001	0.926346	0.195479	-0.00662319	0.0005	1e-06	-13.2705	0.194257	0.00477003	0.00456247	1e-06	2.22569	0.194081	-0.000823149	0.00435819	1e-06	2.11869
0.25056	3	2.07591	0.193506	0.000234993	0.00429016	0.001	0.96242	0.195467	0.00200514	0.0005	1e-06	17.2602	0.194262	0.00479148	0.00464445	1e-06	2.26639	0.19409	-0.000748173	0.00443354	1e-06	2.15402
0.25172	2.99997	2.07593	0.193652	0.000373694	0.00433765	0.001	0.998918	0.195472	-0.00778418	0.0005	1e-06	-12.6178	0.194268	0.00481169	0.0047264	1e-06	2.30708	0.1941	-0.000669835	0.00450886	1e-06	2.18945
0.25288	2.99993	2.07598	0.19292	0.000352566	0.00437668	0.001	1.03737	0.195458	-0.000402449	0.0005	1e-06	-19.3854	0.194273	0.00483067	0.00480832	1e-06	2.34775	0.194109	-0.000588608	0.00458416	1e-06	2.22497
0.25404	2.99985	2.07604	0.194678	0.0011334	0.00440885	0.001	1.07571	0.195458	0.0139873	0.0005	1e-06	10.4914	0.194279	0.0048484	0.00489017	1e-06	2.3884	0.194118	-0.000504966	0.0046594	1e-06	2.26056
0.2552	2.99975	2.07613	0.192773	-7.96174e-06	0.0044404	0.001	1.1193	0.195455	0.00752431	0.0005	1e-06	12.7546	0.194285	0.00486486	0.00497193	1e-06	2.429	0.194128	-0.000419374	0.00473456	1e-06	2.29623
0.25636	2.99962	2.07624	0.193213	0.000934606	0.00448919	0.001	1.15739	0.195471	0.00289787	0.0005	1e-06	16.2711	0.19429	0.00488007	0.00505357	1e-06	2.46956	0.194138	-0.000332294	0.00480963	1e-06	2.33197
0.25752	2.99946	2.07637	0.193799	0.00139745	0.00456148	0.001	1.20241	0.195477	-0.00632443	0.0005	1e-06	-13.4567	0.194296	0.00489399	0.00513508	1e-06	2.51005	0.194147	-0.000244178	0.00488458	1e-06	2.36776
0.25868	2.99928	2.07652	0.193652	0.00122086	0.00462637	0.001	1.2507	0.195465	0.0021391	0.0005	1e-06	17.1036	0.194302	0.00490663	0.00521644	1e-06	2.55047	0.194157	-0.000155467	0.00495939	1e-06	2.40361
0.25984	2.99907	2.0767	0.193799	0.00120611	0.00470254	0.001	1.30122	0.19547	-0.00793795	0.0005	1e-06	-12.5392	0.194307	0.00491798	0.0052976	1e-06	2.5908	0.194167	-6.65933e-05	0.00503405	1e-06	2.4395
0.261	2.99883	2.0769	0.193799	0.0010326	0.00476993	0.001	1.35212	0.195455	-0.00117353	0.0005	1e-06	-18.3022	0.194313	0.00492802	0.00537857	1e-06	2.63104	0.194177	2.20254e-05	0.00510853	1e-06	2.47542
0.26216	2.99857	2.07712	0.193799	0.000860399	0.00483174	0.001	1.40118	0.195454	0.01196	0.0005	1e-06	10.9924	0.194319	0.00493674	0.0054593	1e-06	2.67117	0.194188	0.000111047	0.00518281	1e-06	2.51137
0.26332	2.99828	2.07737	0.193359	0.000689289	0.00490897	0.001	1.45139	0.195481	0.0128316	0.0005	1e-06	10.7591	0.194324	0.00494414	0.00553977	1e-06	2.71118	0.194198	0.000200393	0.00525687	1e-06	2.54733
0.26448	2.99797	2.07763	0.193799	0.000999963	0.00500945	0.001	1.5031	0.195474	0.00341127	0.0005	1e-06	15.7569	0.19433	0.00495021	0.00561997	1e-06	2.75105	0.194209	0.000289626	0.00533069	1e-06	2.5833
0.26564	2.99763	2.07792	0.192041	0.000830997	0.00510155	0.001	1.55742	0.195481	-0.00574749	0.0005	1e-06	-13.8396	0.194336	0.00495492	0.00569987	1e-06	2.79079	0.194219	0.000378316	0.00540426	1e-06	2.61926
0.2668	2.99726	2.07823	0.195703	0.00258672	0.00519933	0.001	1.61167	0.19547	0.00281102	0.0005	1e-06	16.3619	0.194342	0.00495827	0.00577945	1e-06	2.83037	0.19423	0.000466044	0.00547755	1e-06	2.65519
0.26796	2.99687	2.07857	0.193945	0.000338156	0.00528742	0.001	1.67725	0.195476	-0.00703877	0.0005	1e-06	-13.0243	0.194347	0.00496025	0.00585867	1e-06	2.86978	0.194241	0.000552399	0.00555054	1e-06	2.6911
0.26912	2.99645	2.07892	0.193652	1.36546e-05	0.00536671	0.001	1.72797	0.195463	0.000163437	0.0005	1e-06	19.7461	0.194353	0.00496085	0.00593753	1e-06	2.90902	0.194252	0.000636982	0.00562321	1e-06	2.72697
0.27028	2.996	2.0793	0.193652	9.77696e-06	0.00545589	0.001	1.77756	0.195463	-0.0125117	0.0005	1e-06	-10.8414	0.194359	0.00496005	0.00601599	1e-06	2.94807	0.194263	0.000719408	0.00569554	1e-06	2.76278
0.27144	2.99553	2.0797	0.193652	5.91175e-06	0.00556515	0.001	1.82881	0.195436	-0.0123082	0.0005	1e-06	-10.8957	0.194365	0.00495784	0.00609403	1e-06	2.98692	0.194274	0.000799308	0.00576751	1e-06	2.79852
0.2726	2.99503	2.08013	0.193799	2.05404e-06	0.00567449	0.001	1.88372	0.195409	-0.0118541	0.0005	1e-06	-11.0227	0.19437	0.00495421	0.00617163	1e-06	3.02556	0.194286	0.000876327	0.00583911	1e-06	2.83418
0.27376	2.9945	2.08057	0.193652	-0.000162104	0.00577938	0.001	1.93975	0.195384	-0.0107621	0.0005	1e-06	-11.3642	0.194376	0.00494914	0.00624876	1e-06	3.06398	0.194297	0.000950126	0.0059103	1e-06	2.86974
0.27492	2.99395	2.08104	0.193359	-0.000166165	0.00587223	0.001	1.99477	0.195362	-0.00816223	0.0005	1e-06	-12.4276	0.194382	0.00494262	0.00632541	1e-06	3.10216	0.194309	0.00102039	0.00598108	1e-06	2.9052
0.27608	2.99337	2.08153	0.193799	0.00015017	0.00595623	0.001	2.0491	0.195346	-0.00250832	0.0005	1e-06	-16.6873	0.194388	0.00493463	0.00640154	1e-06	3.1401	0.194321	0.00108681	0.00605142	1e-06	2.94053
0.27724	2.99277	2.08204	0.193506	-1.42147e-05	0.00604081	0.001	2.1029	0.195342	0.00849931	0.000121963	1e-06	12.2665	0.194393	0.00492517	0.00647714	1e-06	3.17779	0.194333	0.00114912	0.0061213	1e-06	2.97573
0.2784	2.99214	2.08258	0.193652	0.000141989	0.00614156	0.001	2.15617	0.195359	0.00364984	7.41565e-05	1e-06	15.5305	0.194399	0.00491421	0.00655219	1e-06	3.21521	0.194345	0.00120704	0.0061907	1e-06	3.01078
0.27956	2.99148	2.08314	0.193213	0.00013807	0.00626868	0.001	2.21297	0.195366	-0.0060236	2.62671e-05	1e-06	-13.6524	0.194405	0.00490175	0.00662665	1e-06	3.25235	0.194358	0.00126036	0.0062596	1e-06	3.04566
0.28072	2.9908	2.08371	0.193652	0.000615236	0.00639212	0.001	2.27196	0.195354	0.00151427	1e-06	1e-06	17.8602	0.19441	0.00488776	0.00670051	1e-06	3.2892	0.19437	0.00130883	0.00632799	1e-06	3.08037
0.28188	2.99009	2.08432	0.193652	0.000612273	0.00650195	0.001	2.33403	0.195357	-0.010284	1e-06	1e-06	-11.5313	0.194416	0.00487223	0.00677374	1e-06	3.32574	0.194383	0.00135228	0.00639583	1e-06	3.11488
0.28304	2.98936	2.08494	0.193506	0.000610088	0.00660221	0.001	2.39604	0.195336	-0.00743963	1e-06	1e-06	-12.8003	0.194422	0.00485515	0.00684632	1e-06	3.36198	0.194396	0.00139052	0.00646313	1e-06	3.14919
0.2842	2.9886	2.08558	0.192773	0.00076898	0.00669843	0.001	2.45434	0.195321	-0.00131005	1e-06	1e-06	-18.1225	0.194427	0.00483651	0.00691822	1e-06	3.39789	0.194409	0.00142341	0.00652984	1e-06	3.18327
0.28536	2.98781	2.08625	0.193359	0.00173036	0.00680855	0.001	2.51363	0.195319	0.0106969	1e-06	1e-06	11.3864	0.194433	0.00481628	0.00698943	1e-06	3.43347	0.194422	0.00145081	0.00659596	1e-06	3.21712
0.28652	2.987	2.08694	0.193799	0.00205273	0.0069428	0.001	2.58055	0.195341	0.00841029	1e-06	1e-06	12.3083	0.194439	0.00479446	0.00705993	1e-06	3.4687	0.194435	0.00147262	0.00666146	1e-06	3.25072
0.28768	2.98616	2.08765	0.193945	0.0018968	0.00707189	0.001	2.65125	0.195358	0.00331238	1e-06	1e-06	15.8531	0.194444	0.00477103	0.00712968	1e-06	3.50358	0.194448	0.00148876	0.00672633	1e-06	3.28405
0.28884	2.9853	2.08838	0.194092	0.00158297	0.00717895	0.001	2.72003	0.195364	-0.00674282	1e-06	1e-06	-13.1981	0.19445	0.00474597	0.00719866	1e-06	3.53808	0.194462	0.00149916	0.00679054	1e-06	3.3171
0.29	2.98441	2.08914	0.193652	0.00111084	0.00727651	0.001	2.78825	0.195351	8.6798e-05	1e-06	1e-06	19.8644	0.194455	0.00471927	0.00726686	1e-06	3.57221	0.194476	0.00150377	0.00685408	1e-06	3.34986
0.29116	2.98349	2.08991	0.193799	0.00112104	0.00735772	0.001	2.84686	0.195351	-0.013233	1e-06	1e-06	-10.6611	0.194461	0.00469092	0.00733425	1e-06	3.60595	0.194489	0.00150259	0.00691693	1e-06	3.38231
0.29232	2.98255	2.09071	0.193652	0.000972351	0.00744747	0.001	2.90428	0.195357	-0.00325546	1e-06	1e-06	-15.909	0.194466	0.0046609	0.0074008	1e-06	3.63928	0.194503	0.0014956	0.00697906	1e-06	3.41444
0.29348	2.98158	2.09153	0.193213	0.000985204	0.00755519	0.001	2.96005	0.195351	0.00685357	1e-06	1e-06	13.1322	0.194471	0.0046292	0.0074665	1e-06	3.6722	0.194517	0.00148282	0.00704046	1e-06	3.44623
0.29464	2.98059	2.09237	0.194971	0.00148022	0.0076655	0.001	3.01974	0.195364	0.000133802	1e-06	1e-06	19.7917	0.194477	0.00459581	0.00753132	1e-06	3.70469	0.194531	0.0014643	0.00710112	1e-06	3.47767
0.2958	2.97957	2.09324	0.193359	5.34699e-05	0.00777312	0.001	3.09036	0.195364	-0.0131331	1e-06	1e-06	-10.685	0.194482	0.00456071	0.00759524	1e-06	3.73675	0.194546	0.00144009	0.007161	1e-06	3.50875
0.29696	2.97853	2.09412	0.193652	0.000390126	0.00786813	0.001	3.15294	0.19537	-0.00296426	1e-06	1e-06	-16.2025	0.194487	0.00452388	0.00765823	1e-06	3.76837	0.19456	0.00141027	0.00722009	1e-06	3.53946
0.29812	2.97746	2.09503	0.193799	0.000406671	0.00794831	0.001	3.21449	0.195365	0.00741925	1e-06	1e-06	12.8114	0.194493	0.00448533	0.00772029	1e-06	3.79952	0.194575	0.00137493	0.00727838	1e-06	3.56977
0.29928	2.97637	2.09596	0.193652	0.00026343	0.00802461	0.001	3.27049	0.19538	0.00126922	1e-06	1e-06	18.1759	0.194498	0.00444503	0.00778137	1e-06	3.83021	0.19459	0.00133417	0.00733584	1e-06	3.59968
0.30044	2.97525	2.09691	0.193506	0.000280826	0.00811574	0.001	3.32439	0.195382	-0.0107793	1e-06	1e-06	-11.3584	0.194503	0.00440297	0.00784146	1e-06	3.86041	0.194604	0.00128813	0.00739245	1e-06	3.62917
0.3016	2.9741	2.09788	0.194092	0.000458881	0.00823109	0.001	3.37956	0.195359	-0.00860641	1e-06	1e-06	-12.2169	0.194508	0.00435914	0.00790054	1e-06	3.89013	0.194619	0.00123692	0.0074482	1e-06	3.65824
0.30276	2.97293	2.09887	0.194824	-3.69353e-06	0.00834292	0.001	3.4377	0.195342	-0.00372606	1e-06	1e-06	-15.4598	0.194513	0.00431353	0.00795859	1e-06	3.91934	0.194634	0.00118072	0.00750307	1e-06	3.68686
0.30392	2.97174	2.09988	0.192627	-0.00126779	0.00844053	0.001	3.49323	0.195335	0.00594341	1e-06	1e-06	13.706	0.194518	0.00426613	0.00801558	1e-06	3.94804	0.19465	0.00111967	0.00755704	1e-06	3.71503
0.30508	2.97052	2.10092	0.193799	-0.000128946	0.0085225	0.001	3.53808	0.195346	-0.00165887	1e-06	1e-06	-17.6791	0.194523	0.00421693	0.00807149	1e-06	3.97621	0.194665	0.00105395	0.00761008	1e-06	3.74273
0.30624	2.96927	2.10197	0.193799	-0.000272692	0.00859977	0.001	3.58347	0.195344	0.00999397	1e-06	1e-06	11.6384	0.194528	0.00416592	0.0081263	1e-06	4.00385	0.19468	0.000983758	0.00766219	1e-06	3.76996
0.3074	2.96801	2.10305	0.193945	-0.000416784	0.00869181	0.001	3.62645	0.195364	0.00677326	1e-06	1e-06	13.1799	0.194533	0.00411309	0.00817998	1e-06	4.03095	0.194696	0.000909271	0.00771334	1e-06	3.79669
0.30856	2.96671	2.10415	0.193945	-0.000721708	0.00880959	0.001	3.67017	0.195377	-2.59219e-05	1e-06	1e-06	-19.9593	0.194537	0.00405843	0.00823252	1e-06	4.05748	0.194711	0.000830694	0.00776351	1e-06	3.82293
0.30972	2.96539	2.10527	0.193506	-0.00102755	0.00892381	0.001	3.71395	0.195378	0.013363	1e-06	1e-06	10.6305	0.194542	0.00400193	0.0082839	1e-06	4.08345	0.194727	0.000748236	0.00781269	1e-06	3.84865
0.31088	2.96405	2.10641	0.193799	-0.000853784	0.00901989	0.001	3.75509	0.195372	0.0036334	1e-06	1e-06	15.5459	0.194547	0.00394359	0.00833409	1e-06	4.10884	0.194743	0.000662111	0.00786086	1e-06	3.87385
0.31204	2.96268	2.10757	0.193652	-0.00100171	0.00910339	0.001	3.79663	0.195378	-0.00612189	1e-06	1e-06	-13.5875	0.194551	0.00388339	0.00838306	1e-06	4.13364	0.194759	0.000572541	0.007908	1e-06	3.89851
0.3132	2.96129	2.10875	0.193652	-0.000990604	0.00917673	0.001	3.82985	0.195367	0.00131046	1e-06	1e-06	18.122	0.194556	0.00382134	0.00843081	1e-06	4.15783	0.194774	0.000479751	0.00795408	1e-06	3.92263
0.31436	2.95987	2.10995	0.193506	-0.000980756	0.0092617	0.001	3.86129	0.195369	-0.0106957	1e-06	1e-06	-11.3868	0.19456	0.00375742	0.0084773	1e-06	4.18142	0.194791	0.000383969	0.0079991	1e-06	3.94619
0.31552	2.95843	2.11117	0.193506	-0.000811849	0.00936926	0.001	3.89214	0.195347	-0.00840682	1e-06	1e-06	-12.3099	0.194564	0.00369163	0.00852252	1e-06	4.20438	0.194807	0.000285426	0.00804304	1e-06	3.96919
0.31668	2.95696	2.11242	0.193799	-0.000643973	0.00947087	0.001	3.92436	0.19533	-0.00330463	1e-06	1e-06	-15.8607	0.194569	0.00362397	0.00856644	1e-06	4.22671	0.194823	0.000184353	0.00808587	1e-06	3.99161
0.31784	2.95547	2.11368	0.193506	-0.000797521	0.00954032	0.001	3.95333	0.195324	0.00675827	1e-06	1e-06	13.1889	0.194573	0.00355443	0.00860905	1e-06	4.2484	0.194839	8.09834e-05	0.00812757	1e-06	4.01344
0.319	2.95396	2.11497	0.193945	-0.000631475	0.00959784	0.001	3.98163	0.195337	-5.56942e-05	1e-06	1e-06	-19.9128	0.194577	0.00348302	0.00865031	1e-06	4.26943	0.194855	-2.44521e-05	0.00816814	1e-06	4.03468
0.32016	2.95242	2.11627	0.193652	-0.00094714	0.00964661	0.001	4.00508	0.195337	0.0132996	1e-06	1e-06	10.6454	0.194581	0.00340972	0.00869022	1e-06	4.2898	0.194872	-0.000130471	0.00820756	1e-06	4.05531
0.32132	2.95085	2.1176	0.193652	-0.000943401	0.00970296	0.001	4.02399	0.195331	0.00344959	1e-06	1e-06	15.7201	0.194585	0.00333453	0.00872875	1e-06	4.30949	0.194888	-0.000236407	0.00824579	1e-06	4.07533
0.32248	2.94927	2.11894	0.193652	-0.00094086	0.0097778	0.001	4.04148	0.195338	-0.00647718	1e-06	1e-06	-13.3605	0.194589	0.00325747	0.00876587	1e-06	4.32849	0.194905	-0.000342071	0.00828283	1e-06	4.09472
0.32364	2.94766	2.12031	0.193799	-0.000939513	0.00985962	0.001	4.06305	0.195325	0.000612372	1e-06	1e-06	19.0786	0.194592	0.00317852	0.00880157	1e-06	4.34679	0.194921	-0.000447286	0.00831867	1e-06	4.11348
0.3248	2.94602	2.12169	0.193652	-0.00109966	0.00990899	0.001	4.08305	0.195326	-0.012128	1e-06	1e-06	-10.9451	0.194596	0.00309769	0.00883583	1e-06	4.36439	0.194938	-0.000551888	0.00835327	1e-06	4.13159
0.32596	2.94436	2.1231	0.193652	-0.0011009	0.00994225	0.001	4.10117	0.1953	-0.0119909	1e-06	1e-06	-10.9836	0.194599	0.00301498	0.00886862	1e-06	4.38127	0.194955	-0.000655727	0.00838663	1e-06	4.14906
0.32712	2.94268	2.12453	0.192041	-0.00110354	0.00997185	0.001	4.11746	0.195274	-0.0116316	1e-06	1e-06	-11.0881	0.194603	0.00293039	0.00889993	1e-06	4.39741	0.194972	-0.000758667	0.00841872	1e-06	4.16586
0.32828	2.94098	2.12597	0.192773	0.000655753	0.0100009	0.001	4.12834	0.195249	-0.0107069	1e-06	1e-06	-11.3829	0.194606	0.00284394	0.00892973	1e-06	4.41282	0.194988	-0.000860584	0.00844953	1e-06	4.182
0.32944	2.93925	2.12744	0.193799	0.00161436	0.0100481	0.001	4.14812	0.195226	-0.00843366	1e-06	1e-06	-12.2972	0.194609	0.00275561	0.008958	1e-06	4.42748	0.195005	-0.000961371	0.00847904	1e-06	4.19746
0.3306	2.9375	2.12893	0.193652	0.0014529	0.0101219	0.001	4.1746	0.19521	-0.00336108	1e-06	1e-06	-15.8056	0.194613	0.00266543	0.00898473	1e-06	4.44137	0.195022	-0.00106093	0.00850724	1e-06	4.21223
0.33176	2.93572	2.13043	0.193506	0.00145359	0.0101637	0.001	4.19803	0.195204	0.00664891	1e-06	1e-06	13.2548	0.194616	0.0025734	0.00900989	1e-06	4.4545	0.195039	-0.00115918	0.0085341	1e-06	4.22632
0.33292	2.93392	2.13196	0.193799	0.00161642	0.010185	0.001	4.2197	0.195216	-0.00027255	1e-06	1e-06	-19.5799	0.194619	0.00247953	0.00903346	1e-06	4.46684	0.195056	-0.00125605	0.00855962	1e-06	4.23969
0.33408	2.9321	2.1335	0.193652	0.0014607	0.0102006	0.001	4.24112	0.195216	0.01284	1e-06	1e-06	10.757	0.194621	0.00238382	0.00905542	1e-06	4.47839	0.195073	-0.00135149	0.00858376	1e-06	4.25236
0.33524	2.93026	2.13506	0.193213	0.00146714	0.010216	0.001	4.25765	0.195209	0.00210131	1e-06	1e-06	17.1475	0.194624	0.00228629	0.00907575	1e-06	4.48914	0.19509	-0.00144544	0.00860652	1e-06	4.26432
0.3364	2.92839	2.13665	0.19248	0.00195635	0.0102474	0.001	4.27347	0.195213	-0.00911215	1e-06	1e-06	-11.9927	0.194627	0.00218696	0.00909444	1e-06	4.49907	0.195107	-0.00153788	0.00862788	1e-06	4.27554
0.33756	2.9265	2.13825	0.193945	0.00324956	0.0103019	0.001	4.29174	0.195194	-0.00481141	1e-06	1e-06	-14.532	0.194629	0.00208583	0.00911146	1e-06	4.50818	0.195124	-0.00162879	0.00864782	1e-06	4.28604
0.33872	2.92459	2.13987	0.194385	0.00294386	0.0103268	0.001	4.31701	0.195186	0.00385222	1e-06	1e-06	15.3444	0.194632	0.00198292	0.00912678	1e-06	4.51645	0.195141	-0.00171817	0.00866632	1e-06	4.29579
0.33988	2.92266	2.14151	0.193799	0.00216099	0.0103191	0.001	4.3388	0.195193	-0.0056996	1e-06	1e-06	-13.8728	0.194634	0.00187825	0.0091404	1e-06	4.52388	0.195159	-0.0018021	0.00868337	1e-06	4.3048
0.34104	2.9207	2.14317	0.193652	0.00202208	0.0102982	0.001	4.35357	0.195182	0.00213414	1e-06	1e-06	17.1094	0.194636	0.00177183	0.0091523	1e-06	4.53046	0.195176	-0.00187677	0.00869895	1e-06	4.31305
0.3422	2.91872	2.14485	0.193652	0.00204603	0.0102779	0.001	4.36597	0.195186	-0.00904717	1e-06	1e-06	-12.0206	0.194638	0.00166368	0.00916244	1e-06	4.53617	0.195193	-0.0019403	0.00871304	1e-06	4.32054
0.34336	2.91672	2.14655	0.193652	0.00207259	0.0102698	0.001	4.37729	0.195167	-0.00467047	1e-06	1e-06	-14.6445	0.19464	0.00155383	0.00917082	1e-06	4.541	0.19521	-0.00199288	0.00872563	1e-06	4.32726
0.34452	2.91469	2.14827	0.193652	0.00210177	0.0102849	0.001	4.38904	0.195159	0.00412381	1e-06	1e-06	15.103	0.194642	0.00144229	0.0091774	1e-06	4.54495	0.195227	-0.00203476	0.0087367	1e-06	4.3332
0.34568	2.91265	2.15	0.193359	0.00213362	0.01033	0.001	4.41042	0.195166	-0.00517618	1e-06	1e-06	-14.2511	0.194643	0.00132909	0.00918219	1e-06	4.54801	0.195244	-0.00206619	0.00874624	1e-06	4.33835
0.34684	2.91058	2.15176	0.193506	0.00248879	0.0103417	0.001	4.42946	0.195157	0.00314834	1e-06	1e-06	16.0156	0.194645	0.00121425	0.00918514	1e-06	4.55016	0.195261	-0.00208749	0.00875422	1e-06	4.34272
0.348	2.90849	2.15353	0.193799	0.00268681	0.0103348	0.001	4.44929	0.195162	-0.00706098	1e-06	1e-06	-13.0116	0.194646	0.0010978	0.00918625	1e-06	4.55139	0.195278	-0.00209897	0.00876063	1e-06	4.34629
0.34916	2.90638	2.15532	0.193506	0.00256764	0.010327	0.001	4.46974	0.195149	-0.000547465	1e-06	1e-06	-19.1725	0.194647	0.000979758	0.0091855	1e-06	4.5517	0.195295	-0.00210102	0.00876546	1e-06	4.34905
0.35032	2.90425	2.15713	0.193652	0.00277233	0.0103262	0.001	4.48667	0.195148	0.0122635	1e-06	1e-06	10.9078	0.194648	0.000860164	0.00918287	1e-06	4.55107	0.195312	-0.00209402	0.00876868	1e-06	4.35099
0.35148	2.90209	2.15896	0.193506	0.00282024	0.0103485	0.001	4.50589	0.195175	0.0123506	1e-06	1e-06	10.8842	0.194649	0.000739042	0.00917833	1e-06	4.5495	0.19533	-0.00207838	0.00877029	1e-06	4.35212
0.35264	2.89992	2.1608	0.193652	0.00303204	0.0103993	0.001	4.52689	0.195202	0.0125833	1e-06	1e-06	10.8226	0.19465	0.000616423	0.00917187	1e-06	4.54697	0.195347	-0.00205453	0.00877026	1e-06	4.35242
0.3538	2.89772	2.16266	0.193945	0.00308737	0.0104162	0.001	4.54704	0.195194	0.00133251	1e-06	1e-06	18.0933	0.194651	0.00049234	0.00916347	1e-06	4.54348	0.195363	-0.00202293	0.00876858	1e-06	4.35189
0.35496	2.8955	2.16455	0.193652	0.00282603	0.0104105	0.001	4.5657	0.195196	-0.010651	1e-06	1e-06	-11.4021	0.194651	0.000366826	0.00915311	1e-06	4.53901	0.19538	-0.00198403	0.00876524	1e-06	4.35052
0.35612	2.89326	2.16644	0.193799	0.00288887	0.0104034	0.001	4.58263	0.195174	-0.00830064	1e-06	1e-06	-12.3605	0.194651	0.000239917	0.00914077	1e-06	4.53356	0.195397	-0.00193831	0.00876022	1e-06	4.3483
0.35728	2.891	2.16836	0.193799	0.00279508	0.0104033	0.001	4.59855	0.195157	-0.00308193	1e-06	1e-06	-16.0824	0.194652	0.000111648	0.00912644	1e-06	4.52712	0.195414	-0.00188625	0.00875349	1e-06	4.34524
0.35844	2.88872	2.1703	0.195996	0.00270484	0.0104225	0.001	4.61447	0.195152	0.00719038	1e-06	1e-06	12.9381	0.194652	-1.79435e-05	0.00911009	1e-06	4.51913	0.195431	-0.00182835	0.00874506	1e-06	4.34131
0.3596	2.88642	2.17225	0.194092	0.00021348	0.0104712	0.001	4.63219	0.195166	0.000807511	1e-06	1e-06	18.8015	0.194652	-0.000143164	0.00909171	1e-06	4.50692	0.195448	-0.00176509	0.00873489	1e-06	4.33651
0.36076	2.8841	2.17422	0.193359	-0.000193664	0.0104859	0.001	4.63292	0.195167	-0.0117238	1e-06	1e-06	-11.0607	0.194651	-0.000261246	0.00907128	1e-06	4.49396	0.195464	-0.00169698	0.00872298	1e-06	4.33084
0.36192	2.88176	2.1762	0.193945	0.000200461	0.0104651	0.001	4.62845	0.195142	-0.0109419	1e-06	1e-06	-11.3043	0.194651	-0.000372818	0.00904877	1e-06	4.48027	0.195481	-0.0016245	0.00870931	1e-06	4.32428
0.36308	2.87939	2.17821	0.193652	-4.63712e-05	0.0104382	0.001	4.62559	0.195119	-0.00899781	1e-06	1e-06	-12.0419	0.19465	-0.000478553	0.00902418	1e-06	4.46585	0.195497	-0.00154814	0.00869387	1e-06	4.31672
0.36424	2.87701	2.18023	0.193652	2.73436e-05	0.0104168	0.001	4.62074	0.195101	-0.00456373	1e-06	1e-06	-14.7313	0.19465	-0.000579148	0.00899748	1e-06	4.45071	0.195514	-0.0014684	0.00867663	1e-06	4.3074
0.3654	2.87461	2.18227	0.193213	0.000101093	0.0104132	0.001	4.61682	0.195092	0.00432941	1e-06	1e-06	14.9263	0.194649	-0.000675303	0.00896865	1e-06	4.43482	0.19553	-0.00138575	0.00865759	1e-06	4.29712
0.36656	2.87219	2.18432	0.193066	0.00065588	0.0104353	0.001	4.61474	0.1951	-0.00478021	1e-06	1e-06	-14.5567	0.194648	-0.000767704	0.00893768	1e-06	4.41817	0.195547	-0.00130066	0.00863673	1e-06	4.28586
0.36772	2.86974	2.18639	0.197168	0.0013718	0.0104566	0.001	4.62394	0.195092	0.00391236	1e-06	1e-06	15.2902	0.194647	-0.000857011	0.00890455	1e-06	4.40074	0.195563	-0.00121359	0.00861403	1e-06	4.27364
0.36888	2.86728	2.18848	0.193799	-0.00239902	0.0104431	0.001	4.63507	0.195099	-0.00558364	1e-06	1e-06	-13.9542	0.194646	-0.000943849	0.00886924	1e-06	4.3825	0.195579	-0.001125	0.00858947	1e-06	4.26046
0.37004	2.8648	2.19058	0.193506	-0.00248592	0.0104204	0.001	4.6225	0.195088	0.00235938	1e-06	1e-06	16.8526	0.194645	-0.0010288	0.00883173	1e-06	4.36342	0.195595	-0.00103532	0.00856305	1e-06	4.2463
0.3712	2.8623	2.1927	0.193652	-0.00225536	0.0104001	0.001	4.60899	0.195092	-0.00860258	1e-06	1e-06	-12.2186	0.194644	-0.00111239	0.008792	1e-06	4.34348	0.195611	-0.000944972	0.00853475	1e-06	4.23119
0.37236	2.85978	2.19484	0.193652	-0.00218798	0.0103945	0.001	4.5974	0.195075	-0.00371792	1e-06	1e-06	-15.4673	0.194643	-0.00119511	0.00875004	1e-06	4.32263	0.195626	-0.000854366	0.00850455	1e-06	4.21512
0.37352	2.85724	2.197	0.19292	-0.00212337	0.0104137	0.001	4.58753	0.195069	0.00595911	1e-06	1e-06	13.6955	0.194641	-0.00127737	0.00870584	1e-06	4.30086	0.195642	-0.000763892	0.00847244	1e-06	4.19808
0.37468	2.85468	2.19917	0.193652	-0.00125993	0.0104391	0.001	4.5798	0.19508	-0.00162823	1e-06	1e-06	-17.7171	0.19464	-0.00135954	0.00865936	1e-06	4.27812	0.195657	-0.000673925	0.0084384	1e-06	4.18006
0.37584	2.85211	2.20135	0.193652	-0.00119962	0.0104297	0.001	4.57451	0.195077	0.0100554	1e-06	1e-06	11.6154	0.194638	-0.00144195	0.0086106	1e-06	4.25439	0.195673	-0.00058482	0.00840243	1e-06	4.16108
0.377	2.84951	2.20355	0.193652	-0.00114083	0.0104002	0.001	4.56574	0.195098	0.00691356	1e-06	1e-06	13.097	0.194636	-0.00152486	0.00855954	1e-06	4.22964	0.195688	-0.000496916	0.00836449	1e-06	4.14114
0.37816	2.8469	2.20577	0.193799	-0.00108348	0.01037	0.001	4.55691	0.195111	0.00025333	1e-06	1e-06	19.609	0.194634	-0.00160849	0.00850616	1e-06	4.20384	0.195703	-0.000410532	0.00832459	1e-06	4.12023
0.37932	2.84427	2.208	0.195117	-0.00118782	0.0103513	0.001	4.54896	0.195111	-0.0128801	1e-06	1e-06	-10.747	0.194633	-0.00169301	0.00845045	1e-06	4.17695	0.195718	-0.000325968	0.0082827	1e-06	4.09838
0.38048	2.84162	2.21025	0.193652	-0.00273639	0.0103551	0.001	4.54242	0.195118	-0.00221979	1e-06	1e-06	-17.0107	0.194631	-0.00177856	0.00839239	1e-06	4.14897	0.195733	-0.000243504	0.00823881	1e-06	4.07556
0.38164	2.83895	2.21251	0.193945	-0.0026854	0.0103883	0.001	4.52817	0.195114	0.00887825	1e-06	1e-06	12.0943	0.194628	-0.00186524	0.00833196	1e-06	4.11987	0.195747	-0.000163397	0.00819291	1e-06	4.05179
0.3828	2.83626	2.21479	0.193652	-0.00295843	0.0103866	0.001	4.51139	0.195132	0.00430666	1e-06	1e-06	14.9456	0.194626	-0.00195312	0.00826915	1e-06	4.08961	0.195762	-8.58864e-05	0.00814498	1e-06	4.02706
0.38396	2.83356	2.21709	0.193652	-0.0029146	0.0103484	0.001	4.48968	0.19514	-0.00482402	1e-06	1e-06	-14.5221	0.194624	-0.00204223	0.00820394	1e-06	4.0582	0.195776	-1.11905e-05	0.00809501	1e-06	4.00138
0.38512	2.83083	2.2194	0.193799	-0.00287448	0.0103064	0.001	4.46748	0.195131	0.00382792	1e-06	1e-06	15.3665	0.194621	-0.0021326	0.00813632	1e-06	4.02561	0.19579	6.09347e-05	0.00804298	1e-06	3.97474
0.38628	2.82809	2.22172	0.193652	-0.00299831	0.0102728	0.001	4.44539	0.195138	-0.00574646	1e-06	1e-06	-13.8403	0.194619	-0.00222422	0.00806626	1e-06	3.99182	0.195803	0.000130939	0.00798889	1e-06	3.94714
0.38744	2.82534	2.22406	0.193359	-0.00296564	0.0102583	0.001	4.42325	0.195127	0.00204301	1e-06	1e-06	17.2156	0.194616	-0.00231708	0.00799376	1e-06	3.95682	0.195817	0.000198615	0.00793272	1e-06	3.91858
0.3886	2.82256	2.22641	0.194092	-0.00261613	0.0102701	0.001	4.40253	0.195131	-0.0092277	1e-06	1e-06	-11.9437	0.194614	-0.00241115	0.0079188	1e-06	3.9206	0.19583	0.000263732	0.00787445	1e-06	3.88906
0.38976	2.81977	2.22878	0.19248	-0.00307146	0.0102825	0.001	4.38436	0.195112	-0.0050632	1e-06	1e-06	-14.3366	0.194611	-0.0025064	0.00784136	1e-06	3.88315	0.195843	0.000326076	0.00781407	1e-06	3.85858
0.39092	2.81696	2.23116	0.193799	-0.00176735	0.0102614	0.001	4.36152	0.195103	0.00336654	1e-06	1e-06	15.8003	0.194608	-0.00260278	0.00776142	1e-06	3.84446	0.195856	0.000385449	0.00775156	1e-06	3.82713
0.39208	2.81414	2.23356	0.193213	-0.00190821	0.0102301	0.001	4.3448	0.195109	-0.00663792	1e-06	1e-06	-13.2615	0.194605	-0.00270025	0.00767898	1e-06	3.80453	0.195869	0.000441675	0.00768693	1e-06	3.79472
0.39324	2.81129	2.23597	0.193652	-0.00141029	0.0102017	0.001	4.32652	0.195096	0.000294751	1e-06	1e-06	19.5464	0.194601	-0.00279876	0.00759401	1e-06	3.76333	0.195881	0.00049459	0.00762014	1e-06	3.76133
0.3944	2.80844	2.23839	0.193506	-0.00139506	0.0101893	0.001	4.31186	0.195096	-0.0127927	1e-06	1e-06	-10.7689	0.194598	-0.00289827	0.00750651	1e-06	3.72088	0.195893	0.000544053	0.00755119	1e-06	3.72696
0.39556	2.80556	2.24083	0.193652	-0.0012213	0.0102015	0.001	4.29824	0.195104	-0.0019602	1e-06	1e-06	-17.3134	0.194595	-0.00299873	0.00741645	1e-06	3.67715	0.195905	0.00058994	0.00748007	1e-06	3.69162
0.39672	2.80267	2.24328	0.193213	-0.00120939	0.0102134	0.001	4.28529	0.1951	0.00939253	1e-06	1e-06	11.8751	0.194591	-0.00310012	0.00732382	1e-06	3.63215	0.195916	0.000632145	0.00699201	1e-06	3.49197
0.39788	2.79976	2.24575	0.193652	-0.000718115	0.0101902	0.001	4.26927	0.195119	0.00542544	1e-06	1e-06	14.0674	0.194588	-0.00320239	0.00722862	1e-06	3.58588	0.195927	0.000670582	0.00638511	1e-06	3.24336
0.39904	2.79684	2.24823	0.19292	-0.000708655	0.0101427	0.001	4.25232	0.195129	-0.00266569	1e-06	1e-06	-16.5164	0.194584	-0.00330551	0.00713081	1e-06	3.53832	0.195938	0.000705182	0.00577821	1e-06	2.9921
0.4002	2.7939	2.25072	0.193359	0.00010142	0.0100973	0.001	4.23485	0.195125	0.00800187	1e-06	1e-06	12.507	0.19458	-0.00340947	0.00703039	1e-06	3.48947	0.195948	0.000735895	0.00517129	1e-06	2.738
0.40136	2.79095	2.25323	0.193359	0.000430714	0.0100662	0.001	4.222	0.19514	0.0024859	4.41904e-05	1e-06	16.7119	0.194576	-0.00332222	0.00729048	1e-06	3.45749	0.195957	0.00076269	0.00486791	1e-06	2.60055
0.40252	2.78798	2.25575	0.193652	0.000760556	0.0100579	0.001	4.21185	0.195145	-0.00827194	8.69403e-05	1e-06	-12.3743	0.194572	-0.00290555	0.00754792	1e-06	3.4585	0.195965	0.000785551	0.00456454	1e-06	2.46135
0.40368	2.78499	2.25828	0.194824	0.000770756	0.0100508	0.001	4.20395	0.195129	-0.00287279	0.000129263	1e-06	-16.2972	0.194569	-0.00223516	0.00780269	1e-06	3.48913	0.195972	0.000804482	0.00426116	1e-06	2.32038
0.40484	2.78199	2.26082	0.193652	-0.00050049	0.010013	0.001	4.19452	0.195124	0.00778896	0.000171137	1e-06	12.6153	0.194567	-0.0013786	0.00805474	1e-06	3.54571	0.195978	0.000819502	0.00395778	1e-06	2.17766
0.406	2.77897	2.26338	0.193506	-0.000489947	0.00994995	0.001	4.17499	0.195139	0.00228929	0.00021254	1e-06	16.9316	0.194566	-0.000394721	0.00830406	1e-06	3.62441	0.195983	0.000830647	0.00365439	1e-06	2.03321
0.40716	2.77594	2.26595	0.193652	-0.000319722	0.00988401	0.001	4.1548	0.195143	-0.00844247	0.000253507	1e-06	-12.2931	0.194566	0.000681748	0.00855061	1e-06	3.70167	0.195987	0.000837969	0.00335099	1e-06	1.88708
0.40832	2.7729	2.26853	0.193945	-0.000310206	0.00982749	0.001	4.13586	0.195127	-0.00298781	0.000294062	1e-06	-16.1783	0.194568	0.00186146	0.00879437	1e-06	3.78204	0.19599	0.000841534	0.00304758	1e-06	1.7393
0.40948	2.76984	2.27113	0.193506	-0.00062169	0.00979196	0.001	4.11779	0.195122	0.00777761	0.000334147	1e-06	12.6212	0.194571	0.00293126	0.00865978	1e-06	3.86478	0.195992	0.000841425	0.00274415	1e-06	1.58996
0.41064	2.76677	2.27373	0.193799	-0.000453055	0.00978355	0.001	4.10741	0.195137	0.00249786	0.000373728	1e-06	16.6987	0.194575	0.00359237	0.00841745	1e-06	3.92883	0.195992	0.000837734	0.00244069	1e-06	1.43914
0.4118	2.76368	2.27635	0.193799	-0.0006056	0.0097736	0.001	4.09737	0.195142	-0.00782516	0.000412876	1e-06	-12.5967	0.194579	0.00385353	0.0081751	1e-06	3.9721	0.195991	0.000830571	0.00213722	1e-06	1.28695
0.41296	2.76058	2.27898	0.193652	-0.000758914	0.00973498	0.001	4.08326	0.195127	-0.0014873	0.000451624	1e-06	-17.8944	0.194583	0.00376281	0.00793276	1e-06	3.99476	0.195988	0.000820053	0.00183371	1e-06	1.1335
0.41412	2.75746	2.28163	0.193652	-0.000752889	0.009687	0.001	4.06595	0.195125	0.0109462	0.000489874	1e-06	11.3029	0.194587	0.00336754	0.00769045	1e-06	3.9973	0.195984	0.000806313	0.00153016	1e-06	0.978921
0.41528	2.75433	2.28428	0.193799	-0.000747819	0.00965052	0.001	4.04867	0.195148	0.00984326	0.000527569	1e-06	11.6959	0.194591	0.00271359	0.00744819	1e-06	3.98046	0.195979	0.000789491	0.00122658	1e-06	0.823346
0.41644	2.75119	2.28695	0.193506	-0.000904002	0.00963635	0.001	4.03223	0.195169	0.00727696	0.000564799	1e-06	12.8897	0.194594	0.00184494	0.00720598	1e-06	3.94518	0.195972	0.000769738	0.000922961	1e-06	0.666921
0.4176	2.74803	2.28962	0.193359	-0.000740726	0.00961889	0.001	4.01363	0.195184	0.00179529	0.00060158	1e-06	17.5116	0.194595	0.000803249	0.00696383	1e-06	3.89249	0.195965	0.000747213	0.000619293	1e-06	0.509791
0.41876	2.74486	2.29231	0.193213	-0.000418087	0.00959038	0.001	3.99959	0.195187	-0.00892405	0.000637937	1e-06	-12.0742	0.194595	-0.000369751	0.00672176	1e-06	3.81244	0.195955	0.000722083	0.000315577	1e-06	0.352106
0.41992	2.74168	2.29501	0.192627	6.43247e-05	0.00953916	0.001	3.98503	0.19517	-0.00343847	0.000673917	1e-06	-15.7307	0.194594	-0.0015754	0.00647974	1e-06	3.6928	0.195945	0.000694521	1.18085e-05	1e-06	0.194008
0.42108	2.73849	2.29772	0.194824	0.00118803	0.00948144	0.001	3.9709	0.195164	0.00739579	0.000709376	1e-06	12.8242	0.194592	-0.00276366	0.00623779	1e-06	3.56068	0.195934	0.000664707	1e-06	1e-06	0.151129
0.42224	2.73528	2.30044	0.193652	-9.13033e-05	0.00943186	0.001	3.96315	0.195179	0.00224202	0.000744255	1e-06	16.9853	0.194588	-0.00390811	0.00599589	1e-06	3.41828	0.195921	0.000632825	1e-06	1e-06	0.113704
0.4234	2.73206	2.30317	0.193652	-8.83276e-05	0.0094012	0.001	3.94816	0.195184	-0.00785466	0.000778711	1e-06	-12.5816	0.194583	-0.00498725	0.00575402	1e-06	3.26768	0.195908	0.000599063	1e-06	1e-06	0.0777425
0.42456	2.72883	2.30591	0.194092	-8.5464e-05	0.00937549	0.001	3.93509	0.195169	-0.00103057	0.000812794	1e-06	-18.4941	0.194576	-0.00598443	0.0055122	1e-06	3.11093	0.195893	0.000563613	1e-06	1e-06	0.043427
0.42572	2.72558	2.30867	0.193359	-0.000563618	0.00935004	0.001	3.92228	0.195168	0.0123424	0.000846322	1e-06	10.8865	0.194569	-0.00688765	0.00527039	1e-06	2.95001	0.195878	0.000526668	1e-06	1e-06	0.0109027
0.42688	2.72233	2.31143	0.193799	-0.000240972	0.00930002	0.001	3.90423	0.19516	0.00230539	0.000879411	1e-06	16.9134	0.19456	-0.00768943	0.0050286	1e-06	2.7868	0.195863	0.000488424	1e-06	1e-06	-0.019722
0.42804	2.71906	2.3142	0.193213	-0.000399542	0.00923157	0.001	3.88399	0.195165	-0.00755683	0.000911942	1e-06	-12.7372	0.194551	-0.00838648	0.00478681	1e-06	2.62303	0.195846	0.000449075	1e-06	1e-06	-0.0483718
0.4292	2.71578	2.31698	0.193359	8.25944e-05	0.0091694	0.001	3.86282	0.195151	-0.000246827	0.000944108	1e-06	-19.6189	0.194541	-0.00897931	0.00454502	1e-06	2.4602	0.19583	0.000408817	1e-06	1e-06	-0.0750014
0.43036	2.71249	2.31977	0.193066	0.000404532	0.00912428	0.001	3.84445	0.195152	0.0141488	0.000975692	1e-06	10.4574	0.19453	-0.00947165	0.00430322	1e-06	2.2996	0.195813	0.000367844	1e-06	1e-06	-0.0995924
0.43152	2.70918	2.32258	0.193652	0.00104759	0.00910311	0.001	3.82875	0.195149	0.00786517	0.00100681	1e-06	12.5762	0.194519	-0.00986987	0.00406141	1e-06	2.14221	0.195795	0.000326347	1e-06	1e-06	-0.122149
0.43268	2.70587	2.32539	0.193652	0.00105076	0.00907953	0.001	3.81589	0.195166	0.00364355	0.0010373	1e-06	15.5364	0.194507	-0.0101823	0.00381957	1e-06	1.98873	0.195778	0.000284515	1e-06	1e-06	-0.142696
0.43384	2.70255	2.32821	0.193506	0.00105527	0.0090264	0.001	3.79955	0.195173	-0.00473682	0.00106736	1e-06	-14.5913	0.194496	-0.0104186	0.0035777	1e-06	1.8396	0.19576	0.000242535	1e-06	1e-06	-0.161272
0.435	2.69921	2.33104	0.193945	0.00122142	0.00895449	0.001	3.78152	0.195165	0.00542003	0.00109705	1e-06	14.0713	0.194483	-0.0105892	0.00333581	1e-06	1.695	0.195743	0.000200588	1e-06	1e-06	-0.177933
0.43616	2.69586	2.33387	0.194092	0.000908217	0.0088854	0.001	3.76447	0.195176	-0.00119273	0.00112609	1e-06	-18.2767	0.194471	-0.0107046	0.00309388	1e-06	1.55491	0.195725	0.000158851	1e-06	1e-06	-0.19274
0.43732	2.69251	2.33672	0.193799	0.000435859	0.0088299	0.001	3.74601	0.195175	0.0124168	0.00115473	1e-06	10.8665	0.194459	-0.0107751	0.00285192	1e-06	1.41915	0.195708	0.000117495	1e-06	1e-06	-0.205766
0.43848	2.68914	2.33958	0.193506	0.000284661	0.00879721	0.001	3.7259	0.195168	0.00314266	0.00118292	1e-06	16.0213	0.194446	-0.0108104	0.00260992	1e-06	1.28742	0.195691	7.6686e-05	1e-06	1e-06	-0.217086
0.43964	2.68576	2.34244	0.193652	0.00045443	0.00876017	0.001	3.70359	0.195175	-0.00552591	0.0012105	1e-06	-13.9952	0.194433	-0.0108196	0.00236788	1e-06	1.15933	0.195674	3.65824e-05	1e-06	1e-06	-0.22678
0.4408	2.68238	2.34531	0.19585	0.000464474	0.00872262	0.001	3.68193	0.195165	0.0041031	0.00123772	1e-06	15.1211	0.194421	-0.0108106	0.00212581	1e-06	1.03443	0.195657	-2.66372e-06	1e-06	1e-06	-0.234929
0.44196	2.67898	2.34819	0.193945	-0.00192944	0.00866589	0.001	3.6588	0.195174	-0.00358335	0.00126428	1e-06	-15.5929	0.194408	-0.0107902	0.0018837	1e-06	0.912269	0.195641	-4.05575e-05	1e-06	1e-06	-0.241613
0.44312	2.67558	2.35108	0.193652	-0.00224186	0.00860621	0.001	3.62032	0.195168	0.0078814	0.00129045	1e-06	12.5679	0.194396	-0.0107645	0.00164155	1e-06	0.792397	0.195625	-7.6728e-05	1e-06	1e-06	-0.246912
0.44428	2.67216	2.35398	0.193945	-0.00223653	0.00855665	0.001	3.58034	0.195185	0.00408661	0.00131592	1e-06	15.1355	0.194383	-0.0107382	0.00139937	1e-06	0.674379	0.19561	-0.000111093	1e-06	1e-06	-0.250901
0.44544	2.66874	2.35688	0.193799	-0.00255463	0.00852646	0.001	3.54112	0.195194	-0.00351413	0.00134096	1e-06	-15.6584	0.194371	-0.0107151	0.00115715	1e-06	0.557815	0.195595	-0.00014358	1e-06	1e-06	-0.253654
0.4466	2.6653	2.35979	0.193799	-0.00271568	0.00849081	0.001	3.49874	0.195188	0.00811368	0.00136561	1e-06	12.4515	0.194359	-0.0106984	0.000914888	1e-06	0.442348	0.19558	-0.00017413	1e-06	1e-06	-0.255241
0.44776	2.66186	2.36271	0.193506	-0.00288018	0.00845274	0.001	3.45494	0.195205	0.00469354	0.00138954	1e-06	14.626	0.194346	-0.0106901	0.000672592	1e-06	0.327661	0.195566	-0.000202691	1e-06	1e-06	-0.255728
0.44892	2.65841	2.36564	0.193652	-0.00272772	0.00839284	0.001	3.40815	0.195215	-0.00223274	0.00141303	1e-06	-16.9959	0.194334	-0.0106919	0.000430259	1e-06	0.213488	0.195552	-0.000229225	1e-06	1e-06	-0.255178
0.45008	2.65495	2.36857	0.191602	-0.00273903	0.00831956	0.001	3.3615	0.195212	0.0107005	0.00143613	1e-06	11.3851	0.194321	-0.0107047	0.000187888	1e-06	0.0996049	0.195539	-0.000253703	1e-06	1e-06	-0.25365
0.45124	2.65148	2.37151	0.193799	-0.000509575	0.00825373	0.001	3.31498	0.195237	0.0108112	0.00145844	1e-06	11.3477	0.194309	-0.0107289	1e-06	1e-06	-0.0141704	0.195526	-0.000276105	1e-06	1e-06	-0.251199
0.4524	2.64801	2.37446	0.194238	-0.000685313	0.00820377	0.001	3.28171	0.195261	0.0111293	0.00148023	1e-06	11.2434	0.194297	-0.0105799	1e-06	1e-06	-0.110501	0.195514	-0.000296422	1e-06	1e-06	-0.247878
0.45356	2.64453	2.37742	0.192627	-0.00134283	0.00814949	0.001	3.24655	0.195286	0.0119855	0.00150148	1e-06	10.9851	0.194284	-0.0102332	1e-06	1e-06	-0.185037	0.195502	-0.000314652	1e-06	1e-06	-0.243738
0.45472	2.64104	2.38038	0.193652	-0.000238717	0.00809081	0.001	3.20592	0.195279	0.00251249	0.00152258	1e-06	16.6827	0.194273	-0.00973627	1e-06	1e-06	-0.2404	0.19549	-0.000330806	1e-06	1e-06	-0.238829
0.45588	2.63754	2.38334	0.193799	-0.000257029	0.00801139	0.001	3.17004	0.195284	-0.00635985	0.00148023	1e-06	-13.4342	0.194262	-0.00913061	1e-06	1e-06	-0.279225	0.195478	-0.000344898	1e-06	1e-06	-0.233198
0.45704	2.63403	2.38632	0.193652	-0.000435971	0.00791656	0.001	3.13287	0.195273	0.00281805	0.00142003	1e-06	16.3545	0.194252	-0.00845158	1e-06	1e-06	-0.304052	0.195467	-0.000356956	1e-06	1e-06	-0.226894
0.4582	2.63052	2.3893	0.193799	-0.000455163	0.0078271	0.001	3.09503	0.195279	-0.00590846	0.00135967	1e-06	-13.7295	0.194242	-0.00772886	1e-06	1e-06	-0.317248	0.195456	-0.00036701	1e-06	1e-06	-0.219962
0.45936	2.627	2.39228	0.193652	-0.000635235	0.00775222	0.001	3.05785	0.195269	0.00352016	0.00129945	1e-06	15.6527	0.194234	-0.0069869	1e-06	1e-06	-0.320962	0.195446	-0.000375102	1e-06	1e-06	-0.21245
0.46052	2.62347	2.39527	0.193799	-0.000655811	0.00769877	0.001	3.02661	0.195277	-0.0046907	0.00123908	1e-06	-14.6282	0.194226	-0.00624543	1e-06	1e-06	-0.317106	0.195435	-0.000381277	1e-06	1e-06	-0.204405
0.46168	2.61994	2.39827	0.194092	-0.000837523	0.00764036	0.001	2.99376	0.195269	0.00568066	0.00117884	1e-06	13.886	0.194219	-0.00552003	1e-06	1e-06	-0.307348	0.195425	-0.000385588	1e-06	1e-06	-0.198073
0.46284	2.6164	2.40127	0.193359	-0.0013409	0.00759085	0.001	2.95973	0.195281	-0.000620286	0.00111844	1e-06	-19.0672	0.194213	-0.00482268	1e-06	1e-06	-0.293129	0.195415	-0.000388093	1e-06	1e-06	-0.19201
0.464	2.61286	2.40428	0.193652	-0.00104447	0.00752462	0.001	2.92115	0.195281	0.0135327	0.00105813	1e-06	10.5915	0.194208	-0.00416227	1e-06	1e-06	-0.275669	0.195405	-0.000388857	1e-06	1e-06	-0.185241
0.46516	2.6093	2.40729	0.193652	-0.00106997	0.00745553	0.001	2.88292	0.195277	0.006188	0.000997855	1e-06	13.5444	0.194204	-0.00354511	1e-06	1e-06	-0.256	0.195395	-0.000387947	1e-06	1e-06	-0.177817
0.46632	2.60575	2.41031	0.193652	-0.00109683	0.00739975	0.001	2.84563	0.195289	0.000142653	0.000937463	1e-06	19.7781	0.1942	-0.00297528	1e-06	1e-06	-0.234974	0.195385	-0.000385436	1e-06	1e-06	-0.16978
0.46748	2.60218	2.41333	0.193799	-0.00112508	0.00736342	0.001	2.80874	0.19529	-0.0119385	0.000877156	1e-06	-10.9985	0.194197	-0.0024551	1e-06	1e-06	-0.213297	0.195376	-0.000381401	1e-06	1e-06	-0.161186
0.46864	2.59862	2.41636	0.195996	-0.00131506	0.00731937	0.001	2.76974	0.195265	-0.0100079	0.000817	1e-06	-11.6332	0.194194	-0.00198539	1e-06	1e-06	-0.191538	0.195366	-0.000375921	1e-06	1e-06	-0.152091
0.4698	2.59504	2.41939	0.18999	-0.00391126	0.00727298	0.001	2.72613	0.195245	-0.00556741	0.000756798	1e-06	-13.9657	0.194192	-0.0015658	1e-06	1e-06	-0.170152	0.195356	-0.000369079	1e-06	1e-06	-0.14255
0.47096	2.59146	2.42242	0.194092	6.00057e-05	0.00720867	0.001	2.66534	0.195236	0.0033663	0.000696533	1e-06	15.8005	0.19419	-0.00119504	1e-06	1e-06	-0.149493	0.195346	-0.00036096	1e-06	1e-06	-0.132619
0.47212	2.58788	2.42546	0.192188	-0.000457141	0.00713414	0.001	2.62807	0.195242	-0.00577218	0.000636182	1e-06	-13.8225	0.194189	-0.000871076	1e-06	1e-06	-0.129832	0.195337	-0.000351651	1e-06	1e-06	-0.122356
0.47328	2.58429	2.4285	0.193652	0.00110907	0.00706631	0.001	2.587	0.195232	0.00281086	0.00057591	1e-06	16.3621	0.194188	-0.000591371	1e-06	1e-06	-0.111364	0.195327	-0.00034124	1e-06	1e-06	-0.111818
0.47444	2.5807	2.43155	0.193652	0.00107366	0.00701673	0.001	2.55585	0.195237	-0.00701105	0.000515568	1e-06	-13.0403	0.194188	-0.000352986	1e-06	1e-06	-0.0942241	0.195316	-0.000329816	1e-06	1e-06	-0.101062
0.4756	2.5771	2.4346	0.193652	0.00103962	0.006959	0.001	2.52287	0.195224	0.00023093	0.000455294	1e-06	19.643	0.194188	-0.000152736	1e-06	1e-06	-0.0784937	0.195306	-0.000317469	1e-06	1e-06	-0.0901454
0.47676	2.5735	2.43766	0.193506	0.00100689	0.00689535	0.001	2.48789	0.195224	-0.0123755	0.000394969	1e-06	-10.8775	0.194188	1.26984e-05	1e-06	1e-06	-0.0645925	0.195296	-0.000304289	1e-06	1e-06	-0.0791237
0.47792	2.5699	2.44071	0.194092	0.00113575	0.00681798	0.001	2.4525	0.195198	-0.0119753	0.000334713	1e-06	-10.988	0.194188	0.000152089	1e-06	1e-06	-0.0554313	0.195286	-0.000290366	1e-06	1e-06	-0.0680516
0.47908	2.56629	2.44377	0.193799	0.00062483	0.00672909	0.001	2.41749	0.195172	-0.01104	0.000274435	1e-06	-11.2722	0.194188	0.00027028	1e-06	1e-06	-0.0463455	0.195275	-0.00027579	1e-06	1e-06	-0.0569821
0.48024	2.56268	2.44684	0.19292	0.000435313	0.00664718	0.001	2.37979	0.19515	-0.00881722	0.000214135	1e-06	-12.1214	0.194188	0.000367652	1e-06	1e-06	-0.0375086	0.195265	-0.000260648	1e-06	1e-06	-0.0459666
0.4814	2.55906	2.4499	0.193652	0.00120817	0.00658066	0.001	2.34163	0.195132	-0.00389402	0.000153811	1e-06	-15.3067	0.194189	0.000444958	1e-06	1e-06	-0.0290661	0.195255	-0.000245028	1e-06	1e-06	-0.0350543
0.48256	2.55544	2.45297	0.193799	0.00118104	0.00650388	0.001	2.30644	0.195125	0.00578271	9.34664e-05	1e-06	13.8153	0.194189	0.000503254	1e-06	1e-06	-0.0211369	0.195245	-0.000229015	1e-06	1e-06	-0.0242923
0.48372	2.55182	2.45605	0.193506	0.00099511	0.00642062	0.001	2.26933	0.195136	-0.00188293	3.31088e-05	1e-06	-17.4057	0.19419	0.000543845	1e-06	1e-06	-0.0138141	0.195235	-0.000212693	1e-06	1e-06	-0.0137251
0.48488	2.5482	2.45912	0.193799	0.00113105	0.00634936	0.001	2.23141	0.195133	0.00955733	1e-06	1e-06	11.8083	0.194191	0.000568221	1e-06	1e-06	-0.00716622	0.195226	-0.000196144	1e-06	1e-06	-0.00339487
0.48604	2.54457	2.4622	0.193652	0.000947816	0.00626445	0.001	2.19318	0.195152	0.0057903	1e-06	1e-06	13.8101	0.194191	0.000578006	1e-06	1e-06	-0.00123918	0.195216	-0.000179446	1e-06	1e-06	0.0066592
0.4872	2.54094	2.46527	0.193652	0.00092609	0.00617352	0.001	2.15203	0.195163	-0.00195727	1e-06	1e-06	-17.3169	0.194192	0.000574905	1e-06	1e-06	0.00394164	0.195207	-0.000162676	1e-06	1e-06	0.0164006
0.48836	2.53731	2.46835	0.193652	0.00090554	0.00609584	0.001	2.11165	0.19516	0.00939836	1e-06	1e-06	11.8728	0.194193	0.000560659	1e-06	1e-06	0.00836929	0.195199	-0.000145907	1e-06	1e-06	0.0257956
0.48952	2.53368	2.47144	0.193652	0.00088614	0.00601503	0.001	2.07233	0.195179	0.00543829	1e-06	1e-06	14.0581	0.194193	0.00053701	1e-06	1e-06	0.012053	0.19519	-0.000129211	1e-06	1e-06	0.0348136
0.49068	2.53004	2.47452	0.193799	0.000867864	0.00592711	0.001	2.03181	0.195189	-0.0026408	1e-06	1e-06	-16.5431	0.194194	0.000505657	1e-06	1e-06	0.0150157	0.195182	-0.000112655	1e-06	1e-06	0.0434266
0.49184	2.52641	2.4776	0.193799	0.000690387	0.00585057	0.001	1.99181	0.195184	0.00805059	1e-06	1e-06	12.4827	0.194194	0.000468236	1e-06	1e-06	0.017292	0.195175	-9.63019e-05	1e-06	1e-06	0.0516098
0.493	2.52277	2.48069	0.193506	0.000513786	0.0057582	0.001	1.94953	0.1952	0.00256177	1e-06	1e-06	16.6288	0.194195	0.000426289	1e-06	1e-06	0.0189258	0.195167	-8.02131e-05	1e-06	1e-06	0.0593412
0.49416	2.51913	2.48377	0.193799	0.000658444	0.0056584	0.001	1.90621	0.195205	-0.00820498	1e-06	1e-06	-12.4067	0.194195	0.000381249	1e-06	1e-06	0.0199681	0.195161	-6.44454e-05	1e-06	1e-06	0.0666015
0.49532	2.51549	2.48686	0.194678	0.000483331	0.00557118	0.001	1.86532	0.195189	-0.00288214	1e-06	1e-06	-16.2875	0.194196	0.000334424	1e-06	1e-06	0.0204752	0.195154	-4.9052e-05	1e-06	1e-06	0.0733742
0.49648	2.51185	2.48995	0.193945	-0.000652987	0.00550109	0.001	1.8243	0.195183	0.0075792	1e-06	1e-06	12.7253	0.194196	0.000286985	1e-06	1e-06	0.0205068	0.195148	-3.40825e-05	1e-06	1e-06	0.0796458
0.49764	2.50821	2.49304	0.193213	-0.000988619	0.00542092	0.001	1.77452	0.195198	0.00159395	1e-06	1e-06	17.7599	0.194196	0.000239966	1e-06	1e-06	0.0201244	0.195143	-1.95823e-05	1e-06	1e-06	0.0854051
0.4988	2.50456	2.49613	0.193652	-0.000523989	0.00534606	0.001	1.72166	0.195201	-0.0101238	1e-06	1e-06	-11.5899	0.194197	0.000194254	1e-06	1e-06	0.0193896	0.195138	-5.59346e-06	1e-06	1e-06	0.0906435
0.49996	2.50092	2.49922	0.193945	-0.000540934	0.00527177	0.001	1.67552	0.19518	-0.00706985	1e-06	1e-06	-13.0065	0.194197	0.000150598	1e-06	1e-06	0.0183631	0.195133	7.88526e-06	1e-06	1e-06	0.095355
0.50112	2.49728	2.50231	0.193652	-0.000879172	0.0051871	0.001	1.62941	0.195166	-0.000565224	1e-06	1e-06	-19.1467	0.194197	0.000109603	1e-06	1e-06	0.0171036	0.195129	2.09704e-05	1e-06	1e-06	0.0995358
0.50228	2.49364	2.5054	0.193799	-0.00089792	0.00510978	0.001	1.58212	0.195166	0.0122265	1e-06	1e-06	10.9179	0.194197	7.17468e-05	1e-06	1e-06	0.0156667	0.195125	3.3636e-05	1e-06	1e-06	0.103185
0.50344	2.49	2.50849	0.193652	-0.00107811	0.005049	0.001	1.5359	0.195192	0.0122522	1e-06	1e-06	10.9109	0.194197	3.73789e-05	1e-06	1e-06	0.0141043	0.195122	4.58387e-05	1e-06	1e-06	0.106302
0.5046	2.48635	2.51157	0.192041	-0.00109937	0.00497601	0.001	1.48652	0.195219	0.0123204	1e-06	1e-06	10.8924	0.194197	6.73436e-06	1e-06	1e-06	0.0124641	0.195119	5.75383e-05	1e-06	1e-06	0.10889
0.50576	2.48271	2.51466	0.193652	0.000641316	0.00489538	0.001	1.43206	0.195246	0.0125024	1e-06	1e-06	10.8438	0.194197	-1.95035e-05	1e-06	1e-06	0.0102388	0.195117	6.86977e-05	1e-06	1e-06	0.110955
0.50692	2.47907	2.51775	0.194092	0.000619478	0.00482946	0.001	1.38863	0.195274	0.0129928	1e-06	1e-06	10.7191	0.194197	-4.05044e-05	1e-06	1e-06	0.00806436	0.195115	7.9283e-05	1e-06	1e-06	0.112502
0.50808	2.47544	2.52084	0.193799	0.000117517	0.00475261	0.001	1.34452	0.195267	0.00255332	1e-06	1e-06	16.638	0.194197	-5.67588e-05	1e-06	1e-06	0.00614507	0.195113	8.92637e-05	1e-06	1e-06	0.11354
0.50924	2.4718	2.52392	0.193945	-6.36883e-05	0.00467092	0.001	1.29729	0.195271	-0.00822156	1e-06	1e-06	-12.3987	0.194197	-6.88465e-05	1e-06	1e-06	0.00447005	0.195112	9.86127e-05	1e-06	1e-06	0.114079
0.5104	2.46816	2.527	0.193359	-0.000405278	0.00460289	0.001	1.25025	0.195255	-0.00291671	1e-06	1e-06	-16.2516	0.194197	-7.73188e-05	1e-06	1e-06	0.00302575	0.195111	0.000107306	1e-06	1e-06	0.114131
0.51156	2.46453	2.53009	0.193799	-0.000106169	0.0045221	0.001	1.19935	0.19525	0.00751183	1e-06	1e-06	12.7613	0.194197	-8.26934e-05	1e-06	1e-06	0.00179668	0.195111	0.000115323	1e-06	1e-06	0.113708
0.51272	2.4609	2.53317	0.193506	-0.000288104	0.00443385	0.001	1.14914	0.195264	0.00145697	1e-06	1e-06	17.933	0.194197	-8.54502e-05	1e-06	1e-06	0.00076609	0.195111	0.000122648	1e-06	1e-06	0.112825
0.51388	2.45727	2.53625	0.193945	-0.000149799	0.00435741	0.001	1.09785	0.195267	-0.0103995	1e-06	1e-06	-11.4899	0.194197	-8.60295e-05	1e-06	1e-06	-8.34517e-05	0.195111	0.000129265	1e-06	1e-06	0.111498
0.51504	2.45364	2.53932	0.193359	-0.000492593	0.00426866	0.001	1.04674	0.195245	-0.00770842	1e-06	1e-06	-12.6572	0.194197	-8.48308e-05	1e-06	1e-06	-0.000769612	0.195112	0.000135166	1e-06	1e-06	0.109746
0.5162	2.45001	2.5424	0.193652	-0.000194801	0.00417369	0.001	0.992694	0.19523	-0.00185713	1e-06	1e-06	-17.4367	0.194196	-8.22128e-05	1e-06	1e-06	-0.0013099	0.195113	0.000140343	1e-06	1e-06	0.107583
0.51736	2.44639	2.54547	0.193652	-0.000217861	0.0040902	0.001	0.941223	0.195227	0.00959769	1e-06	1e-06	11.7921	0.194196	-7.84939e-05	1e-06	1e-06	-0.00172134	0.195114	0.000144792	1e-06	1e-06	0.104806
0.51852	2.44277	2.54854	0.193652	-0.000241199	0.00399328	0.001	0.888379	0.195246	0.00588015	1e-06	1e-06	13.7487	0.194196	-7.3954e-05	1e-06	1e-06	-0.00202026	0.195115	0.000148513	1e-06	1e-06	0.100233
0.51968	2.43915	2.55161	0.192041	-0.000264842	0.0038867	0.001	0.833759	0.195258	-0.00178225	1e-06	1e-06	-17.5274	0.194196	-6.88361e-05	1e-06	1e-06	-0.00222209	0.195117	0.000151508	1e-06	1e-06	0.0954139
0.52084	2.43554	2.55467	0.193945	0.00147451	0.00378967	0.001	0.778496	0.195255	0.0097471	1e-06	1e-06	11.7331	0.194196	-6.33484e-05	1e-06	1e-06	-0.00234124	0.195119	0.000153784	1e-06	1e-06	0.0903783
0.522	2.43193	2.55774	0.193506	0.0011318	0.00371216	0.001	0.742861	0.195274	0.00621452	1e-06	1e-06	13.5272	0.194196	-5.76671e-05	1e-06	1e-06	-0.00239098	0.195122	0.000155348	1e-06	1e-06	0.0851574
0.52316	2.42832	2.5608	0.192188	0.00127143	0.00362773	0.001	0.704544	0.195286	-0.0011285	1e-06	1e-06	-18.3622	0.194196	-5.1939e-05	1e-06	1e-06	-0.00238344	0.195124	0.000156212	1e-06	1e-06	0.0797815
0.52432	2.42472	2.56385	0.194824	0.00285541	0.00354787	0.001	0.666677	0.195284	0.0110659	1e-06	1e-06	11.2638	0.194196	-4.6284e-05	1e-06	1e-06	-0.00232959	0.195127	0.00015639	1e-06	1e-06	0.0742804
0.52548	2.42112	2.5669	0.193945	0.00155755	0.00348413	0.001	0.646797	0.195308	0.00929963	1e-06	1e-06	11.9136	0.194196	-4.0798e-05	1e-06	1e-06	-0.00223919	0.19513	0.000155898	1e-06	1e-06	0.0686795
0.52664	2.41753	2.56995	0.193652	0.00122349	0.00340774	0.001	0.616982	0.195326	0.00522115	1e-06	1e-06	14.2175	0.194196	-3.55555e-05	1e-06	1e-06	-0.00212091	0.195134	0.000154756	1e-06	1e-06	0.0630109
0.5278	2.41394	2.573	0.192041	0.00121158	0.00334418	0.001	0.585642	0.195336	-0.00306099	1e-06	1e-06	-16.1037	0.194196	-3.06123e-05	1e-06	1e-06	-0.00198229	0.195137	0.000152986	1e-06	1e-06	0.0573025
0.52896	2.41035	2.57604	0.193359	0.00296455	0.0032864	0.001	0.558597	0.195331	0.00723108	1e-06	1e-06	12.9153	0.194196	-2.60077e-05	1e-06	1e-06	-0.00182986	0.195141	0.000150609	1e-06	1e-06	0.0515816
0.53012	2.40677	2.57908	0.194385	0.00327856	0.00322425	0.001	0.542134	0.195345	0.000880769	1e-06	2.21235e-05	18.6995	0.194196	-2.17673e-05	1e-06	1e-06	-0.00166918	0.195144	0.000147653	1e-06	1e-06	0.0458742
0.53128	2.40319	2.58211	0.193799	0.00247461	0.00317005	0.001	0.528544	0.195346	-0.0116105	1e-06	5.01781e-05	-11.0944	0.194196	-1.79045e-05	1e-06	1e-06	-0.00150492	0.195148	0.000144143	1e-06	1e-06	0.0402054
0.53244	2.39962	2.58514	0.193799	0.002315	0.00310125	0.001	0.509314	0.195321	-0.0107386	1e-06	7.92565e-05	-11.3722	0.194196	-1.44231e-05	1e-06	1e-06	-0.00134095	0.195152	0.00014011	1e-06	1e-06	0.034599
0.5336	2.39606	2.58816	0.193359	0.00215834	0.00301933	0.001	0.487144	0.195298	-0.00863105	1e-06	0.000109366	-12.2056	0.194196	-1.13186e-05	1e-06	1e-06	-0.00118039	0.195156	0.000135583	1e-06	1e-06	0.0290775
0.53476	2.3925	2.59118	0.193799	0.00248533	0.00294665	0.001	0.46379	0.195281	-0.00392763	1e-06	0.000140512	-15.2765	0.194196	-8.58012e-06	1e-06	1e-06	-0.00102571	0.19516	0.000130594	1e-06	1e-06	0.023662
0.53592	2.38894	2.5942	0.193506	0.00233456	0.00289396	0.001	0.443305	0.195274	0.00538546	1e-06	0.000172708	14.0964	0.194196	-6.19176e-06	1e-06	1e-06	-0.000878801	0.195164	0.000125177	1e-06	1e-06	0.0183723
0.53708	2.38539	2.59721	0.193652	0.00250737	0.00283485	0.001	0.421355	0.195284	-0.00295207	1e-06	0.000205981	-16.2151	0.194196	-4.13377e-06	1e-06	1e-06	-0.000741047	0.195168	0.000119364	1e-06	1e-06	0.0132265
0.53824	2.38185	2.60021	0.193799	0.00252305	0.00277389	0.001	0.400544	0.195279	0.00720251	1e-06	0.000240254	12.9313	0.194196	-2.38377e-06	1e-06	1e-06	-0.000613392	0.195172	0.000113191	1e-06	1e-06	0.00824141
0.5394	2.37831	2.60321	0.193652	0.00238163	0.00272729	0.001	0.388202	0.195292	0.000533819	1e-06	0.000275623	19.1923	0.194196	-9.17587e-07	1e-06	1e-06	-0.000496407	0.195176	0.000106693	1e-06	1e-06	0.00343218
0.54056	2.37479	2.6062	0.193652	0.00240354	0.00266553	0.001	0.372753	0.195293	-0.0126109	1e-06	0.000311983	-10.8155	0.194196	2.89868e-07	1e-06	1e-06	-0.000399043	0.19518	9.99053e-05	1e-06	1e-06	-0.00118752
0.54172	2.37126	2.60919	0.193652	0.0024285	0.00260792	0.001	0.356685	0.1953	-0.00195373	1e-06	0.000349409	-17.3211	0.194196	1.31609e-06	1e-06	1e-06	-0.00032979	0.195184	9.28649e-05	1e-06	1e-06	-0.00560556
0.54288	2.36775	2.61217	0.193945	0.00245654	0.00256676	0.001	0.341607	0.195297	0.00900763	1e-06	0.000387818	12.0377	0.194196	2.18237e-06	1e-06	1e-06	-0.000261371	0.195188	8.56078e-05	1e-06	1e-06	-0.00981132
0.54404	2.36424	2.61515	0.194385	0.0021671	0.00251955	0.001	0.326391	0.195314	0.00408074	1e-06	0.000427365	15.1407	0.194196	2.89214e-06	1e-06	1e-06	-0.00019505	0.195192	7.81703e-05	1e-06	1e-06	-0.0137957
0.5452	2.36073	2.61812	0.192627	0.00139949	0.00246932	0.001	0.309351	0.195322	-0.00574818	1e-06	0.000467891	-13.8391	0.194196	3.45155e-06	1e-06	1e-06	-0.000131884	0.195195	7.05885e-05	1e-06	1e-06	-0.0175509
0.54636	2.35724	2.62109	0.193359	0.0025573	0.00242995	0.001	0.288045	0.19531	0.00149112	1e-06	0.000509328	17.8896	0.194196	3.86893e-06	1e-06	1e-06	-7.27286e-05	0.195199	6.28983e-05	1e-06	1e-06	-0.0210709
0.54752	2.35375	2.62404	0.193506	0.00291684	0.0023735	0.001	0.271842	0.195313	-0.0109062	1e-06	0.000551867	-11.3161	0.194196	4.15441e-06	1e-06	1e-06	-1.82489e-05	0.195202	5.51351e-05	1e-06	1e-06	-0.0243505
0.54868	2.35027	2.62699	0.193652	0.00311978	0.00231773	0.001	0.256679	0.195289	-0.00970057	1e-06	0.000595233	-11.7514	0.194196	4.31942e-06	1e-06	1e-06	3.10711e-05	0.195206	4.73337e-05	1e-06	1e-06	-0.0273863
0.54984	2.3468	2.62994	0.193652	0.00316638	0.00227495	0.001	0.243207	0.195269	-0.0069073	1e-06	0.000639619	-13.1006	0.194196	4.37633e-06	1e-06	1e-06	7.49139e-05	0.195209	3.95283e-05	1e-06	1e-06	-0.030176
0.551	2.34334	2.63288	0.193799	0.003217	0.00224588	0.001	0.236595	0.195255	-0.00100802	1e-06	0.000685057	-18.5247	0.194196	4.33807e-06	1e-06	1e-06	0.000113113	0.195212	3.1752e-05	1e-06	1e-06	-0.0327184
0.55216	2.33988	2.63581	0.194385	0.0031114	0.00221422	0.001	0.230152	0.195253	0.0105451	1e-06	0.000731606	11.4387	0.194196	4.21778e-06	1e-06	1e-06	0.000145637	0.195215	2.40372e-05	1e-06	1e-06	-0.0350134
0.55332	2.33644	2.63873	0.19585	0.00236853	0.00218226	0.001	0.220879	0.195274	0.00704142	1e-06	0.000779393	13.0228	0.194196	4.02857e-06	1e-06	1e-06	0.000172571	0.195218	1.6415e-05	1e-06	1e-06	-0.0370622
0.55448	2.333	2.64164	0.194238	2.56429e-05	0.00213058	0.001	0.205	0.195287	-0.000422756	1e-06	0.00082812	-19.3553	0.194196	3.78318e-06	1e-06	1e-06	0.000194104	0.19522	8.91558e-06	1e-06	1e-06	-0.0388669
0.55564	2.32957	2.64455	0.193945	-0.00055388	0.00206996	0.001	0.172122	0.195287	0.0115976	1e-06	0.000877713	11.0982	0.194196	3.49386e-06	1e-06	1e-06	0.000210506	0.195222	1.5676e-06	1e-06	1e-06	-0.0404304
0.5568	2.32615	2.64745	0.194385	-0.000813499	0.00201892	0.001	0.135555	0.19531	0.0093414	1e-06	0.000928602	11.8962	0.194196	3.17212e-06	1e-06	1e-06	0.000222116	0.195225	-5.56333e-06	1e-06	1e-06	-0.0417567
0.55796	2.32274	2.65035	0.193506	-0.00155506	0.0019898	0.001	0.10007	0.195328	0.00411014	1e-06	0.000980442	15.1149	0.194196	2.82864e-06	1e-06	1e-06	0.000229325	0.195227	-1.23843e-05	1e-06	1e-06	-0.0428505
0.55912	2.31934	2.65323	0.193652	-0.00133678	0.00195698	0.001	0.0597518	0.195335	-0.00630656	1e-06	0.00103315	-13.4681	0.194196	2.47313e-06	1e-06	1e-06	0.000232561	0.195228	-1.88737e-05	1e-06	1e-06	-0.0437172
0.56028	2.31595	2.65611	0.193652	-0.00128049	0.00192431	0.001	0.0209504	0.195322	-0.000263551	1e-06	0.00108658	-19.5935	0.194196	2.11429e-06	1e-06	1e-06	0.000232276	0.19523	-2.50178e-05	1e-06	1e-06	-0.044363
0.56144	2.31257	2.65898	0.193066	-0.00122584	0.00187236	0.001	-0.0188815	0.195322	0.0116484	1e-06	0.00114117	11.0831	0.194196	1.75974e-06	1e-06	1e-06	0.000228935	0.195231	-3.08048e-05	1e-06	1e-06	-0.0447947
0.5626	2.3092	2.66184	0.194385	-0.000531522	0.00180495	0.001	-0.0617341	0.195345	0.00908989	1e-06	0.00119713	12.0022	0.194196	1.41604e-06	1e-06	1e-06	0.000223001	0.195232	-3.62248e-05	1e-06	1e-06	-0.0450197
0.56376	2.30583	2.66469	0.193359	-0.00128061	0.00174834	0.001	-0.0991869	0.195363	0.00323682	1e-06	0.00125399	15.9275	0.194196	1.08868e-06	1e-06	1e-06	0.000214931	0.195233	-4.12701e-05	1e-06	1e-06	-0.0450458
0.56492	2.30248	2.66753	0.193945	-0.000909203	0.00171253	0.001	-0.139821	0.195368	-0.00828824	1e-06	0.00131165	-12.3665	0.194196	7.82079e-07	1e-06	1e-06	0.000205166	0.195234	-4.59348e-05	1e-06	1e-06	-0.0448814
0.56608	2.29914	2.67036	0.193652	-0.00118016	0.00167344	0.001	-0.177876	0.19535	-0.00469733	1e-06	0.0013699	-14.6229	0.194196	4.99697e-07	1e-06	1e-06	0.000194121	0.195235	-5.02147e-05	1e-06	1e-06	-0.044536
0.56724	2.29581	2.67319	0.193652	-0.00113201	0.00163336	0.001	-0.217721	0.195341	0.00252412	1e-06	0.00142924	16.6699	0.194196	2.44043e-07	1e-06	1e-06	0.000182185	0.195235	-5.41075e-05	1e-06	1e-06	-0.0440177
0.5684	2.29249	2.676	0.193799	-0.0010853	0.00157442	0.001	-0.25825	0.195344	-0.00986826	1e-06	0.0014898	-11.6862	0.194196	1.67638e-08	1e-06	1e-06	0.000169713	0.195235	-5.76126e-05	1e-06	1e-06	-0.0433361
0.56956	2.28918	2.67881	0.193652	-0.00120027	0.00149886	0.001	-0.299977	0.195322	-0.00849346	1e-06	0.00155083	-12.2692	0.194196	-1.75551e-07	1e-06	1e-06	0.000152121	0.195235	-6.07313e-05	1e-06	1e-06	-0.0425007
0.57072	2.28589	2.68161	0.193799	-0.00115646	0.00142905	0.001	-0.342481	0.195304	-0.00544417	1e-06	0.00161286	-14.0539	0.194196	-3.28416e-07	1e-06	1e-06	0.000135982	0.195235	-6.3466e-05	1e-06	1e-06	-0.0415216
0.57188	2.2826	2.68439	0.193506	-0.00127442	0.00137809	0.001	-0.383506	0.195293	0.000783666	1e-06	0.00167598	18.835	0.194196	-4.46083e-07	1e-06	1e-06	0.000121763	0.195234	-6.58211e-05	1e-06	1e-06	-0.0404087
0.57304	2.27933	2.68717	0.193799	-0.00107339	0.00134281	0.001	-0.419215	0.195293	-0.0136471	1e-06	0.0017403	-10.5657	0.194196	-5.32909e-07	1e-06	1e-06	0.000109377	0.195234	-6.78022e-05	1e-06	1e-06	-0.0391722
0.5742	2.27606	2.68994	0.193652	-0.00119433	0.00130611	0.001	-0.45386	0.195296	-0.00741392	1e-06	0.00180565	-12.8143	0.194196	-5.93027e-07	1e-06	1e-06	9.87182e-05	0.195233	-6.94162e-05	1e-06	1e-06	-0.0378225
0.57536	2.27281	2.69269	0.193652	-0.00115649	0.0012602	0.001	-0.485883	0.19528	-0.0034431	1e-06	0.00187149	-15.7263	0.194196	-6.30308e-07	1e-06	1e-06	8.96681e-05	0.195232	-7.06713e-05	1e-06	1e-06	-0.0363696
0.57652	2.26957	2.69544	0.193652	-0.00112011	0.0011965	0.001	-0.519189	0.195273	0.00441667	1e-06	0.00193848	14.8529	0.194196	-6.48336e-07	1e-06	1e-06	8.20986e-05	0.195231	-7.15769e-05	1e-06	1e-06	-0.0353096
0.57768	2.26635	2.69818	0.193799	-0.00108515	0.00113508	0.001	-0.552883	0.19528	-0.00678686	1e-06	0.00200677	-13.1718	0.194196	-6.50393e-07	1e-06	1e-06	7.58772e-05	0.19523	-7.21437e-05	1e-06	0.000106051	-0.0688344
0.57884	2.26313	2.7009	0.193652	-0.00121188	0.00108748	0.001	-0.585784	0.195265	-0.00237892	1e-06	0.00207543	-16.8307	0.194196	-6.39451e-07	1e-06	1e-06	7.08703e-05	0.195229	-0.000114507	1e-06	0.000345938	-0.147183
0.58	2.25993	2.70362	0.193506	-0.00117984	0.00106448	0.001	-0.617735	0.19526	0.00628481	1e-06	0.00214526	13.482	0.194196	-6.18174e-07	1e-06	1e-06	6.69459e-05	0.195228	-0.000199917	1e-06	0.000590507	-0.227575
0.58116	2.25674	2.70632	0.193652	-0.000988991	0.00104049	0.001	-0.649512	0.19527	-0.00346938	1e-06	0.00221648	-15.7011	0.194196	-5.88923e-07	1e-06	1e-06	6.3976e-05	0.195226	-0.000327124	1e-06	0.000839741	-0.310089
0.58232	2.25357	2.70902	0.193359	-0.000959704	0.00101625	0.001	-0.680457	0.195263	0.00398712	1e-06	0.0022881	15.2233	0.194196	-7.66251e-05	1e-06	0.00018727	-0.00679219	0.195224	-0.000494749	1e-06	0.00109362	-0.394799
0.58348	2.25041	2.7117	0.19541	-0.000611029	0.000970819	0.001	-0.713227	0.195268	-0.00799349	1e-06	0.00236105	-12.5112	0.194195	-0.000329729	1e-06	0.000431143	-0.0313618	0.195222	-0.000701297	1e-06	0.00135212	-0.482732
0.58464	2.24726	2.71437	0.193359	-0.00250737	0.000925047	0.001	-0.744616	0.195251	-0.00536651	1e-06	0.00243419	-14.1103	0.194195	-0.000740912	1e-06	0.000680109	-0.0732815	0.195219	-0.000945164	1e-06	0.00161522	-0.573337
0.5858	2.24412	2.71703	0.193799	-0.00216266	0.000890503	0.001	-0.787581	0.195239	4.12039e-06	1e-06	0.00250841	19.9935	0.194194	-0.00127677	1e-06	0.00093414	-0.130846	0.195216	-0.00122465	1e-06	0.0018829	-0.66657
0.58696	2.241	2.71968	0.194971	-0.0023016	0.000877989	0.00409038	-0.827517	0.195237	-0.0162389	1e-06	0.00258385	-10.0812	0.194192	-0.00190775	1e-06	0.00119321	-0.202402	0.195213	-0.00153799	1e-06	0.00215514	-0.762464
0.58812	2.23789	2.72232	0.193945	-0.00372588	0.000863472	0.0041797	-0.868634	0.195234	-0.0170054	1e-06	0.00266015	-9.96905	0.194189	-0.00260807	1e-06	0.00145728	-0.286364	0.195209	-0.00188331	1e-06	0.0024319	-0.861046
0.58928	2.23479	2.72494	0.193506	-0.00403277	0.000849257	0.00427123	-0.91854	0.195229	-0.0198554	1e-06	0.0027373	-9.64495	0.194186	-0.00335546	1e-06	0.00172633	-0.381232	0.195205	-0.00225871	1e-06	0.00271318	-0.962336
0.59044	2.23171	2.72755	0.193506	-0.00386388	0.000810533	0.00434261	-0.973478	0.195219	0.00980002	1e-06	0.00281516	11.7126	0.194181	-0.00413103	1e-06	0.00200032	-0.485595	0.1952	-0.00266224	1e-06	0.00299893	-1.06635
0.5916	2.22865	2.73016	0.193652	-0.00369988	0.000764296	0.00441175	-1.02963	0.195236	0.0026935	1e-06	0.00289493	16.4866	0.194176	-0.00491898	1e-06	0.00227921	-0.598141	0.195195	-0.0030919	1e-06	0.00328914	-1.17309
0.59276	2.22559	2.73274	0.193359	-0.00370089	0.000726758	0.00449347	-1.08519	0.195239	-0.0111605	1e-06	0.00297507	-11.2334	0.19417	-0.00570644	1e-06	0.00256299	-0.717662	0.195189	-0.00354569	1e-06	0.00358377	-1.28257
0.59392	2.22256	2.73532	0.191309	-0.00338599	0.000708719	0.00459871	-1.14036	0.195212	-0.0138944	1e-06	0.0030549	-10.5113	0.194163	-0.00648317	1e-06	0.0028516	-0.843053	0.195183	-0.00402159	1e-06	0.00388279	-1.39478
0.59508	2.21953	2.73788	0.193359	-0.000831145	0.000717129	0.00471677	-1.18542	0.195214	-0.0104591	1e-06	0.00313673	-11.4688	0.194155	-0.00724134	1e-06	0.00314502	-0.973317	0.195176	-0.00451758	1e-06	0.00418619	-1.50971
0.59624	2.21653	2.74044	0.193506	-0.000521598	0.00072488	0.00483771	-1.2161	0.195189	-0.0122605	1e-06	0.00321833	-10.9086	0.194146	-0.00797528	1e-06	0.00344322	-1.10757	0.195169	-0.00503169	1e-06	0.00449393	-1.62734
0.5974	2.21353	2.74297	0.193652	-0.000373016	0.000698667	0.00493225	-1.25016	0.195194	-0.00580276	1e-06	0.00330208	-13.8015	0.194137	-0.00868121	1e-06	0.00374616	-1.24502	0.195161	-0.00556195	1e-06	0.00480597	-1.74765
0.59856	2.21056	2.7455	0.19292	-0.00038521	0.000657825	0.00502065	-1.28743	0.195181	-0.00187319	1e-06	0.00338588	-17.4174	0.194126	-0.00935701	1e-06	0.00405381	-1.38501	0.195152	-0.00610646	1e-06	0.00512229	-1.87062
0.59972	2.20759	2.74801	0.193652	0.000403622	0.000622449	0.00511931	-1.32573	0.195175	0.00587641	1e-06	0.0034709	13.7513	0.194115	-0.010002	1e-06	0.00436613	-1.52696	0.195143	-0.0066634	1e-06	0.00544285	-1.99619
0.60088	2.20465	2.75051	0.193799	0.00039145	0.000605664	0.0052415	-1.35925	0.195184	-0.00574844	1e-06	0.00355741	-13.8389	0.194103	-0.0106166	1e-06	0.0046831	-1.67041	0.195133	-0.007231	1e-06	0.00576763	-2.12433
0.60204	2.20172	2.753	0.193652	0.000219473	0.000615972	0.00539515	-1.39187	0.195171	-0.00205706	1e-06	0.00364374	-17.1991	0.19409	-0.0112022	1e-06	0.00500468	-1.81497	0.195123	-0.00780759	1e-06	0.00609659	-2.25499
0.6032	2.1988	2.75547	0.193799	0.000208077	0.000623943	0.00555177	-1.42722	0.195165	0.00523117	1e-06	0.00373127	14.21	0.194077	-0.011761	1e-06	0.00533083	-1.96036	0.195112	-0.00839162	1e-06	0.0064297	-2.38811
0.60436	2.1959	2.75793	0.193945	3.66423e-05	0.000599371	0.00567902	-1.46581	0.195172	-0.00725303	1e-06	0.00382029	-12.903	0.194063	-0.0122957	1e-06	0.00566153	-2.10635	0.1951	-0.00898166	1e-06	0.00676692	-2.52363
0.60552	2.19302	2.76038	0.193652	-0.000295049	0.000553072	0.00578946	-1.50843	0.195155	-0.0055526	1e-06	0.00390892	-13.9762	0.194048	-0.0128094	1e-06	0.00599673	-2.2528	0.195088	-0.00957639	1e-06	0.00710822	-2.66147
0.60668	2.19015	2.76281	0.193652	-0.000306509	0.000509006	0.00590725	-1.55421	0.195142	-0.00206029	1e-06	0.00399856	-17.1954	0.194033	-0.0133054	1e-06	0.00633642	-2.39961	0.195075	-0.0101746	1e-06	0.00745357	-2.80157
0.60784	2.1873	2.76522	0.193652	-0.000318358	0.000478738	0.00604416	-1.60036	0.195136	0.00484324	1e-06	0.0040894	14.5069	0.194018	-0.0137873	1e-06	0.00668054	-2.54673	0.195061	-0.0107754	1e-06	0.00780293	-2.94384
0.609	2.18447	2.76763	0.193506	-0.000330611	0.000473078	0.00621121	-1.6461	0.195142	-0.00838318	1e-06	0.00418172	-12.3211	0.194001	-0.0142586	1e-06	0.00702907	-2.69414	0.195047	-0.0113778	1e-06	0.00815627	-3.0882
0.61016	2.18165	2.77002	0.193359	-0.00018298	0.000466449	0.00638227	-1.69318	0.195122	-0.00856664	1e-06	0.0042734	-12.2352	0.193984	-0.0147228	1e-06	0.00738197	-2.84185	0.195032	-0.0119811	1e-06	0.00851355	-3.23457
0.61132	2.17885	2.77239	0.193652	0.000124721	0.000444898	0.006532	-1.737	0.195101	-0.00912016	1e-06	0.00436582	-11.9892	0.193967	-0.0151833	1e-06	0.00773921	-2.98991	0.195016	-0.0125847	1e-06	0.00887473	-3.38287
0.61248	2.17607	2.77475	0.191162	0.000111975	0.000397549	0.00666289	-1.78293	0.195079	-0.0105864	1e-06	0.00445891	-11.4243	0.193949	-0.0156434	1e-06	0.00810076	-3.13835	0.195	-0.0131883	1e-06	0.00923978	-3.53301
0.61364	2.1733	2.7771	0.194678	0.00282452	0.000349136	0.00679915	-1.8307	0.195052	-0.0145496	1e-06	0.0045525	-10.3763	0.193931	-0.0161062	1e-06	0.00846656	-3.28723	0.194983	-0.0137915	1e-06	0.00960867	-3.6849
0.6148	2.17055	2.77943	0.193359	0.00169338	0.000311995	0.00695023	-1.86171	0.19505	-0.0153863	1e-06	0.00464838	-10.2212	0.193912	-0.0165747	1e-06	0.00883659	-3.43661	0.194966	-0.0143943	1e-06	0.00998135	-3.83847
0.61596	2.16782	2.78175	0.193652	0.00200712	0.000296925	0.00713028	-1.89955	0.195047	-0.018484	1e-06	0.00474494	-9.78452	0.193892	-0.0170518	1e-06	0.0092108	-3.58654	0.194948	-0.0149968	1e-06	0.0103578	-3.99362
0.61712	2.16511	2.78405	0.193506	0.0020028	0.00031088	0.00733023	-1.92833	0.195038	0.0099113	1e-06	0.00484193	11.6698	0.193872	-0.01754	1e-06	0.00958916	-3.73708	0.194929	-0.015599	1e-06	0.010738	-4.15029
0.61828	2.16241	2.78633	0.194238	0.00216132	0.000324436	0.00753639	-1.95869	0.195053	0.000392079	1e-06	0.0049413	19.4008	0.193852	-0.0180418	1e-06	0.00997163	-3.88827	0.194909	-0.0162012	1e-06	0.0111218	-4.3084
0.61944	2.15973	2.78861	0.194385	0.00152108	0.000301195	0.00771415	-1.9932	0.195051	-0.0181977	1e-06	0.00504027	-9.81727	0.19383	-0.0185595	1e-06	0.0103582	-4.04017	0.194889	-0.0168039	1e-06	0.0115093	-4.46788
0.6206	2.15707	2.79086	0.193799	0.000722455	0.000272893	0.00789472	-2.0339	0.195042	0.010273	1e-06	0.00513959	11.5353	0.193809	-0.0190953	1e-06	0.0107487	-4.19281	0.194868	-0.0174076	1e-06	0.0119004	-4.62865
0.62176	2.15443	2.7931	0.194531	0.000565965	0.000252667	0.00808842	-2.07946	0.195058	0.000750463	1e-06	0.0052414	18.8817	0.193786	-0.0196514	1e-06	0.0111433	-4.34622	0.194847	-0.0180129	1e-06	0.0122951	-4.79067
0.62292	2.15181	2.79533	0.193652	-0.000391323	0.000252887	0.00830788	-2.12512	0.195056	-0.0177748	1e-06	0.00534271	-9.86817	0.193763	-0.0202296	1e-06	0.0115417	-4.50042	0.194825	-0.0186205	1e-06	0.0126933	-4.95387
0.62408	2.1492	2.79754	0.195264	-0.000387289	0.000281302	0.00856114	-2.17514	0.195048	0.011205	1e-06	0.00544434	11.2193	0.193739	-0.0208319	1e-06	0.0119441	-4.65545	0.194802	-0.0192311	1e-06	0.013095	-5.11819
0.62524	2.14662	2.79973	0.196875	-0.00214708	0.000306956	0.00882293	-2.22847	0.195066	0.002279	1e-06	0.00554865	16.9433	0.193715	-0.02146	1e-06	0.0123503	-4.8113	0.194779	-0.0198456	1e-06	0.0135001	-5.28359
0.6264	2.14405	2.80191	0.193799	-0.00567293	0.000298115	0.00905874	-2.29701	0.195067	-0.0149678	1e-06	0.00565243	-10.2965	0.193689	-0.0221156	1e-06	0.0127602	-4.968	0.194754	-0.020465	1e-06	0.0139086	-5.45003
0.62756	2.1415	2.80407	0.193652	-0.00583962	0.000280335	0.00929597	-2.39011	0.195063	-0.0191869	1e-06	0.00575666	-9.70957	0.193663	-0.0228003	1e-06	0.013174	-5.12556	0.19473	-0.0210901	1e-06	0.0143206	-5.61745
0.62872	2.13897	2.80622	0.193652	-0.00585342	0.000267541	0.00954345	-2.48434	0.195052	0.00521489	1e-06	0.00586104	14.2222	0.193636	-0.0235157	1e-06	0.0135914	-5.28399	0.194704	-0.0217219	1e-06	0.0147358	-5.78584
0.62988	2.13646	2.80834	0.193506	-0.00587464	0.000272888	0.00981389	-2.57753	0.195058	-0.00968186	1e-06	0.00596744	-11.7587	0.193609	-0.0242633	1e-06	0.0140124	-5.44329	0.194678	-0.0223614	1e-06	0.0151543	-5.95515
0.63104	2.13397	2.81046	0.193506	-0.00574303	0.00030568	0.0101177	-2.66946	0.195032	-0.0142998	1e-06	0.00607207	-10.4263	0.19358	-0.0250444	1e-06	0.0144371	-5.60347	0.194651	-0.0230097	1e-06	0.0155761	-6.12536
0.6322	2.1315	2.81255	0.193652	-0.0056187	0.000338066	0.0104305	-2.76277	0.19503	-0.0176757	1e-06	0.00617925	-9.88056	0.193551	-0.0258605	1e-06	0.0148653	-5.76455	0.194623	-0.0236677	1e-06	0.016001	-6.29643
0.63336	2.12905	2.81463	0.193652	-0.00566181	0.000335997	0.0107194	-2.86063	0.195021	0.0093967	1e-06	0.00628662	11.8734	0.19352	-0.0267127	1e-06	0.0152969	-5.92655	0.194595	-0.0243366	1e-06	0.0164291	-6.46835
0.63452	2.12661	2.8167	0.193799	-0.0057121	0.000318064	0.0110055	-2.96368	0.195035	-0.00237409	1e-06	0.00639656	-16.8361	0.193489	-0.0276022	1e-06	0.0157319	-6.08947	0.194565	-0.0250174	1e-06	0.0168603	-6.6411
0.63568	2.1242	2.81874	0.193652	-0.00592995	0.000300516	0.0112995	-3.06824	0.195027	0.00163457	1e-06	0.00650538	17.7092	0.193456	-0.0285301	1e-06	0.0161704	-6.25333	0.194535	-0.0257111	1e-06	0.0172946	-6.81466
0.63684	2.12181	2.82077	0.193652	-0.00599503	0.000297277	0.0116093	-3.17181	0.195025	-0.0173866	1e-06	0.00661548	-9.91768	0.193422	-0.0294974	1e-06	0.016612	-6.41816	0.194504	-0.0264187	1e-06	0.0177318	-6.98901
0.638	2.11944	2.82278	0.193799	-0.00606771	0.000319964	0.011951	-3.2743	0.195017	0.00941859	1e-06	0.00672562	11.8645	0.193388	-0.0305048	1e-06	0.017057	-6.58398	0.194473	-0.0271412	1e-06	0.018172	-7.16415
0.63916	2.11708	2.82478	0.193652	-0.0063084	0.000342264	0.0123031	-3.37984	0.19503	-0.00285863	1e-06	0.0068384	-16.312	0.193352	-0.0315532	1e-06	0.0175051	-6.7508	0.19444	-0.0278797	1e-06	0.0186152	-7.34005
0.64032	2.11475	2.82676	0.193652	-0.0063968	0.000329338	0.0126314	-3.49235	0.195021	0.000170525	1e-06	0.00694981	19.7353	0.193314	-0.0326432	1e-06	0.0179563	-6.91866	0.194407	-0.0286351	1e-06	0.0190611	-7.51671
0.64148	2.11244	2.82872	0.193652	-0.00649331	0.000309839	0.012964	-3.60846	0.195016	-0.0210792	1e-06	0.00706236	-9.54149	0.193276	-0.0337752	1e-06	0.0184105	-7.08758	0.194372	-0.0294082	1e-06	0.0195099	-7.69412
0.64264	2.11015	2.83066	0.193506	-0.00659807	0.000295362	0.0133031	-3.72331	0.195002	-0.00168679	1e-06	0.00717459	-17.6445	0.193236	-0.0349496	1e-06	0.0188677	-7.25758	0.194337	-0.0302001	1e-06	0.0199615	-7.87227
0.6438	2.10788	2.83259	0.194531	-0.0065509	0.000296737	0.0136636	-3.83784	0.194995	0.00220379	1e-06	0.00728816	17.0291	0.193195	-0.0361668	1e-06	0.0193277	-7.42869	0.194301	-0.0310116	1e-06	0.0204157	-8.05116
0.64496	2.10563	2.8345	0.19248	-0.00763417	0.000324814	0.0140571	-3.95043	0.194994	-0.017131	1e-06	0.007403	-9.95181	0.193152	-0.0374268	1e-06	0.0197906	-7.60092	0.194264	-0.0318434	1e-06	0.0208726	-8.23078
0.64612	2.1034	2.83639	0.19292	-0.00648288	0.000355607	0.0144652	-4.07214	0.194985	0.00841995	1e-06	0.00751769	12.3037	0.193108	-0.0387296	1e-06	0.0202563	-7.77429	0.194226	-0.0326964	1e-06	0.0213321	-8.41112
0.64728	2.10119	2.83826	0.193945	-0.00582074	0.000351967	0.0148507	-4.19229	0.194996	-0.00566485	1e-06	0.00763496	-13.897	0.193062	-0.0400753	1e-06	0.0207246	-7.94882	0.194187	-0.0335713	1e-06	0.0217942	-8.59217
0.64844	2.09901	2.84011	0.194092	-0.0062881	0.000327836	0.0152341	-4.31544	0.19498	-0.00666229	1e-06	0.00775014	-13.2467	0.193015	-0.0414636	1e-06	0.0211955	-8.12452	0.194146	-0.0344689	1e-06	0.0222587	-8.77394
0.6496	2.09684	2.84195	0.193799	-0.00692375	0.000306426	0.0156229	-4.43999	0.194961	-0.00908476	1e-06	0.00786563	-12.0044	0.192966	-0.0428941	1e-06	0.0216689	-8.3014	0.194105	-0.0353897	1e-06	0.0227256	-8.95641
0.65076	2.0947	2.84377	0.193506	-0.00724759	0.000299332	0.0160261	-4.56494	0.194934	-0.0154237	1e-06	0.00798097	-10.2147	0.192915	-0.0443667	1e-06	0.0221447	-8.47945	0.194063	-0.0363345	1e-06	0.0231949	-9.13959
0.65192	2.09258	2.84557	0.193652	-0.00726002	0.000315843	0.0164597	-4.69039	0.194928	-0.0268447	1e-06	0.00809896	-9.23762	0.192863	-0.0458807	1e-06	0.0226229	-8.6587	0.194019	-0.0373037	1e-06	0.0236665	-9.32346
0.65308	2.09048	2.84735	0.194385	-0.00744196	0.000362953	0.0169344	-4.81535	0.194905	-0.0119846	1e-06	0.00821575	-10.9854	0.192809	-0.0474357	1e-06	0.0231034	-8.83913	0.193975	-0.0382979	1e-06	0.0241404	-9.50802
0.65424	2.0884	2.84911	0.194092	-0.00843487	0.00037254	0.0173887	-4.94892	0.194906	-0.0138893	1e-06	0.00833569	-10.5124	0.192753	-0.049031	1e-06	0.0235861	-9.02074	0.193929	-0.0393176	1e-06	0.0246164	-9.69327
0.6554	2.08634	2.85086	0.193799	-0.00911789	0.000356238	0.0178326	-5.09427	0.194903	-0.0212064	1e-06	0.00845574	-9.53174	0.192695	-0.050666	1e-06	0.0240709	-9.20353	0.193882	-0.0403631	1e-06	0.0250945	-9.87919
0.65656	2.08431	2.85258	0.194092	-0.00949187	0.000335719	0.0182797	-5.24451	0.194887	-0.00399142	1e-06	0.00857501	-15.2195	0.192635	-0.0523399	1e-06	0.0245577	-9.3875	0.193833	-0.041435	1e-06	0.0255747	-10.0658
0.65772	2.08229	2.85429	0.193799	-0.0101985	0.000326456	0.0187322	-5.39101	0.194874	-0.00410683	1e-06	0.00869512	-15.1178	0.192574	-0.0540519	1e-06	0.0250464	-9.57262	0.193783	-0.0425335	1e-06	0.0260568	-10.253
0.65888	2.0803	2.85598	0.193799	-0.0105975	0.000338507	0.0192115	-5.53962	0.19486	-0.00448974	1e-06	0.00881574	-14.7922	0.19251	-0.0558011	1e-06	0.025537	-9.7589	0.193732	-0.043659	1e-06	0.0265409	-10.441
0.66004	2.07833	2.85765	0.193652	-0.0110099	0.000378861	0.0197293	-5.68974	0.194846	-0.00545578	1e-06	0.00893677	-14.0455	0.192444	-0.0575866	1e-06	0.0260293	-9.94632	0.19368	-0.0448116	1e-06	0.0270269	-10.6295
0.6612	2.07639	2.8593	0.193652	-0.011276	0.000386361	0.0202302	-5.84868	0.194829	-0.00774812	1e-06	0.00905805	-12.6365	0.192376	-0.0594073	1e-06	0.0265233	-10.1349	0.193626	-0.0459917	1e-06	0.0275146	-10.8187
0.66236	2.07446	2.86093	0.193506	-0.0115564	0.000359467	0.0207095	-6.01429	0.194806	-0.0134883	1e-06	0.00917907	-10.6016	0.192306	-0.0612623	1e-06	0.0270189	-10.3245	0.193571	-0.0471993	1e-06	0.028004	-11.0086
0.66352	2.07256	2.86254	0.193652	-0.0116912	0.000326037	0.0211919	-6.18307	0.194802	-0.021584	1e-06	0.00930301	-9.50382	0.192234	-0.0631504	1e-06	0.027516	-10.5153	0.193515	-0.0484346	1e-06	0.028495	-11.1991
0.66468	2.07068	2.86414	0.193652	-0.0120011	0.000299199	0.0216741	-6.34632	0.194785	-0.00582643	1e-06	0.00942584	-13.7853	0.19216	-0.0650705	1e-06	0.0280145	-10.7072	0.193456	-0.0496976	1e-06	0.0289877	-11.3901
0.66584	2.06883	2.86571	0.193652	-0.0123263	0.000292868	0.0221814	-6.50865	0.194767	-0.00919837	1e-06	0.00954897	-11.956	0.192083	-0.0670213	1e-06	0.0285143	-10.9001	0.193397	-0.0509884	1e-06	0.0294818	-11.5818
0.667	2.06699	2.86726	0.193652	-0.0126671	0.000314007	0.0227262	-6.67173	0.194739	-0.0182692	1e-06	0.0096713	-9.80897	0.192004	-0.0690017	1e-06	0.0290154	-11.0941	0.193336	-0.0523069	1e-06	0.0299773	-11.7741
0.66816	2.06519	2.8688	0.193652	-0.013024	0.000328552	0.023265	-6.83441	0.194726	0.000257344	1e-06	0.00979617	19.6029	0.191923	-0.0710103	1e-06	0.0295175	-11.2891	0.193273	-0.0536532	1e-06	0.0304742	-11.967
0.66932	2.0634	2.87032	0.193799	-0.0133974	0.00030863	0.023783	-7.00427	0.194721	-0.0244429	1e-06	0.00992237	-9.33489	0.19184	-0.0730458	1e-06	0.0300207	-11.4851	0.193208	-0.0550271	1e-06	0.0309724	-12.1604
0.67048	2.06163	2.87181	0.193652	-0.0139481	0.000272035	0.0242978	-7.17992	0.1947	-0.0108956	1e-06	0.0100471	-11.3196	0.191754	-0.0751068	1e-06	0.0305248	-11.6821	0.193142	-0.0564284	1e-06	0.0314718	-12.3544
0.67164	2.05989	2.87329	0.193652	-0.0143563	0.000238865	0.0248063	-7.35116	0.194702	-0.0135771	1e-06	0.0101752	-10.5814	0.191665	-0.077192	1e-06	0.0310298	-11.88	0.193075	-0.057857	1e-06	0.0319723	-12.5489
0.6728	2.05818	2.87474	0.193652	-0.0147826	0.000221475	0.0253323	-7.52085	0.194697	-0.0244385	1e-06	0.0103031	-9.3351	0.191575	-0.0793	1e-06	0.0315356	-12.0788	0.193005	-0.0593126	1e-06	0.0324738	-12.744
0.67396	2.05648	2.87618	0.193652	-0.0152278	0.000229141	0.0258913	-7.69082	0.194676	-0.0113314	1e-06	0.0104291	-11.1796	0.191481	-0.0814294	1e-06	0.032042	-12.2786	0.192934	-0.060795	1e-06	0.0329763	-12.9395
0.67512	2.05481	2.8776	0.193506	-0.0156922	0.000267296	0.0264986	-7.8648	0.194676	-0.015928	1e-06	0.0105585	-10.1303	0.191386	-0.0835788	1e-06	0.032549	-12.4791	0.192861	-0.0623039	1e-06	0.0334797	-13.1356
0.67628	2.05317	2.87899	0.193506	-0.0160163	0.000269356	0.0270861	-8.04741	0.194667	0.00531146	1e-06	0.0106871	14.1506	0.191288	-0.0857467	1e-06	0.0330564	-12.6805	0.192786	-0.063839	1e-06	0.0339838	-13.3322
0.67744	2.05155	2.88037	0.19292	-0.0163607	0.000253144	0.0276708	-8.23599	0.19467	-0.0150419	1e-06	0.0108178	-10.2828	0.191187	-0.0879318	1e-06	0.0335643	-12.8826	0.19271	-0.0653999	1e-06	0.0344888	-13.5292
0.6786	2.04995	2.88172	0.193652	-0.0160846	0.000234909	0.0282457	-8.41974	0.194662	0.00809672	1e-06	0.0109475	12.4598	0.191084	-0.0901327	1e-06	0.0340725	-13.0855	0.192631	-0.0669862	1e-06	0.0349943	-13.7266
0.67976	2.04837	2.88306	0.194092	-0.0166305	0.00022935	0.0288301	-8.59559	0.19467	-0.0102453	1e-06	0.0110799	-11.5454	0.190978	-0.092348	1e-06	0.0345808	-13.289	0.192551	-0.0685974	1e-06	0.0355004	-13.9245
0.68092	2.04682	2.88438	0.194092	-0.0176785	0.000246533	0.0294441	-8.77175	0.194672	-0.0131964	1e-06	0.011212	-10.6698	0.190869	-0.0945765	1e-06	0.0350893	-13.4931	0.192468	-0.0702332	1e-06	0.0360071	-14.1228
0.68208	2.04529	2.88567	0.19292	-0.0187488	0.000294226	0.0301025	-8.95341	0.194668	-0.0254401	1e-06	0.0113434	-9.29043	0.190758	-0.0968168	1e-06	0.0355978	-13.6978	0.192384	-0.0718929	1e-06	0.0365141	-14.3214
0.68324	2.04379	2.88695	0.193799	-0.0185605	0.000306634	0.0307441	-9.1477	0.194645	-0.0138119	1e-06	0.0114726	-10.5292	0.190645	-0.0990677	1e-06	0.0361063	-13.903	0.192298	-0.0735761	1e-06	0.0370214	-14.5204
0.6844	2.04231	2.8882	0.193652	-0.0193577	0.000296942	0.0313813	-9.34564	0.194639	-0.0291398	1e-06	0.0116046	-9.1712	0.190528	-0.101328	1e-06	0.0366146	-14.1086	0.19221	-0.0752823	1e-06	0.037529	-14.7198
0.68556	2.04086	2.88943	0.193799	-0.020019	0.000279086	0.0320034	-9.54176	0.194611	-0.0185034	1e-06	0.0117338	-9.78236	0.19041	-0.103596	1e-06	0.0371227	-14.3147	0.192119	-0.0770109	1e-06	0.0380367	-14.9195
0.68672	2.03943	2.89065	0.190576	-0.0208661	0.000273187	0.0326288	-9.73296	0.194597	-0.00361317	1e-06	0.0118654	-15.5648	0.190288	-0.105872	1e-06	0.0376304	-14.5211	0.192027	-0.0787613	1e-06	0.0385446	-15.1194
0.68788	2.03802	2.89184	0.192627	-0.018213	0.00028776	0.0332795	-9.92503	0.194582	-0.00700547	1e-06	0.0119973	-13.0435	0.190164	-0.108153	1e-06	0.0381378	-14.7277	0.191932	-0.0805329	1e-06	0.0390524	-15.3196
0.68904	2.03664	2.89301	0.192773	-0.0178273	0.000330572	0.0339731	-10.1004	0.194558	-0.0155174	1e-06	0.012128	-10.1986	0.190037	-0.11044	1e-06	0.0386446	-14.9346	0.191836	-0.082325	1e-06	0.0395601	-15.5201
0.6902	2.03529	2.89416	0.193652	-0.0176245	0.000352091	0.0346556	-10.2745	0.194549	0.00324528	1e-06	0.0122614	15.9191	0.189908	-0.11273	1e-06	0.0391509	-15.1417	0.191737	-0.0841371	1e-06	0.0400676	-15.7207
0.69136	2.03395	2.89529	0.193799	-0.0184059	0.000351568	0.0353341	-10.4518	0.194547	-0.0209986	1e-06	0.0123965	-9.54777	0.189776	-0.115024	1e-06	0.0396565	-15.3489	0.191636	-0.0859685	1e-06	0.0405749	-15.9216
0.69252	2.03265	2.8964	0.193652	-0.019371	0.000336751	0.035987	-10.6251	0.194529	-0.00890114	1e-06	0.0125292	-12.0842	0.189641	-0.117319	1e-06	0.0401614	-15.5561	0.191533	-0.0878185	1e-06	0.0410819	-16.1226
0.69368	2.03136	2.89749	0.193799	-0.0202004	0.000329316	0.036632	-10.7924	0.194534	-0.0109217	1e-06	0.0126661	-11.3109	0.189503	-0.119616	1e-06	0.0406654	-15.7634	0.191428	-0.0896865	1e-06	0.0415884	-16.3236
0.69484	2.03011	2.89855	0.193506	-0.0212157	0.00034165	0.0372949	-10.957	0.194533	-0.019063	1e-06	0.0128024	-9.72224	0.189363	-0.121914	1e-06	0.0411685	-15.9706	0.19132	-0.0915719	1e-06	0.0420945	-16.5248
0.696	2.02887	2.8996	0.193652	-0.0219373	0.000380742	0.0379951	-11.1246	0.194518	-0.0062254	1e-06	0.0129365	-13.5202	0.189221	-0.124211	1e-06	0.0416706	-16.1777	0.191211	-0.0934738	1e-06	0.0425999	-16.726
0.69716	2.02767	2.90062	0.193799	-0.0228471	0.00041255	0.0387071	-11.2994	0.194495	-0.0146683	1e-06	0.0130698	-10.3531	0.189075	-0.126508	1e-06	0.0421717	-16.3847	0.191099	-0.0953917	1e-06	0.0431047	-16.9273
0.69832	2.02649	2.90162	0.193652	-0.0239462	0.000409997	0.0394078	-11.4863	0.194486	0.00406207	1e-06	0.0132057	15.1571	0.188927	-0.128803	1e-06	0.0426716	-16.5914	0.190984	-0.0973249	1e-06	0.0436087	-17.1285
0.69948	2.02533	2.90261	0.193652	-0.0249154	0.000392449	0.0400895	-11.6736	0.194486	-0.0205047	1e-06	0.0133433	-9.58781	0.188776	-0.131096	1e-06	0.0431703	-16.798	0.190868	-0.0992727	1e-06	0.044112	-17.3297
0.70064	2.0242	2.90357	0.193652	-0.0259162	0.000377704	0.0407563	-11.8533	0.194468	-0.00932597	1e-06	0.0134782	-11.9026	0.188623	-0.133386	1e-06	0.0436677	-17.0042	0.190749	-0.101234	1e-06	0.0446143	-17.5308
0.7018	2.02309	2.9045	0.193652	-0.0269499	0.000378917	0.0414346	-12.0298	0.19447	-0.014354	1e-06	0.013617	-10.4153	0.188467	-0.135672	1e-06	0.0441637	-17.2101	0.190628	-0.103209	1e-06	0.0451156	-17.7318
0.70296	2.02201	2.90542	0.193506	-0.0280178	0.000404609	0.042146	-12.2081	0.194462	0.00394629	1e-06	0.0137542	15.2597	0.188308	-0.137955	1e-06	0.0446582	-17.4157	0.190504	-0.105197	1e-06	0.0456159	-17.9327
0.70412	2.02095	2.90632	0.193652	-0.028961	0.000429247	0.0428722	-12.3931	0.19446	-0.021429	1e-06	0.0138929	-9.5151	0.188147	-0.140234	1e-06	0.0451513	-17.6208	0.190379	-0.107196	1e-06	0.046115	-18.1333
0.70528	2.01992	2.90719	0.193506	-0.0301013	0.00041877	0.0435785	-12.5864	0.194441	-0.0113656	1e-06	0.0140287	-11.169	0.187983	-0.142507	1e-06	0.0456427	-17.8255	0.19025	-0.109207	1e-06	0.0466129	-18.3338
0.70644	2.01892	2.90804	0.194531	-0.0311194	0.00039176	0.0442727	-12.7831	0.194438	-0.024274	1e-06	0.0141676	-9.34307	0.187816	-0.144775	1e-06	0.0461325	-18.0296	0.19012	-0.111228	1e-06	0.0471095	-18.5339
0.7076	2.01794	2.90887	0.192773	-0.0332992	0.000361355	0.0449417	-12.9706	0.194415	-0.0154499	1e-06	0.0143031	-10.2102	0.187647	-0.147038	1e-06	0.0466205	-18.2333	0.189987	-0.113259	1e-06	0.0476047	-18.7338
0.70876	2.01698	2.90968	0.193359	-0.0335976	0.000339911	0.045612	-13.1605	0.194404	-0.000804484	1e-06	0.0144411	-18.8058	0.187475	-0.149294	1e-06	0.0471067	-18.4364	0.189851	-0.1153	1e-06	0.0480985	-18.9334
0.70992	2.01605	2.91047	0.193506	-0.0345799	0.0003398	0.0463084	-13.3455	0.194394	-0.00362315	1e-06	0.0145796	-15.5555	0.187301	-0.151544	1e-06	0.0475911	-18.6389	0.189714	-0.117349	1e-06	0.0485907	-19.1326
0.71108	2.01515	2.91124	0.193506	-0.0357664	0.000367994	0.047052	-13.535	0.194377	-0.0101559	1e-06	0.014717	-11.5781	0.187124	-0.153786	1e-06	0.0480735	-18.8407	0.189573	-0.119406	1e-06	0.0490813	-19.3315
0.71224	2.01427	2.91198	0.193506	-0.0369983	0.000388888	0.0477871	-13.7245	0.194376	-0.0204159	1e-06	0.0148576	-9.59532	0.186944	-0.156021	1e-06	0.0485538	-19.0419	0.189431	-0.12147	1e-06	0.0495703	-19.5299
0.7134	2.01342	2.9127	0.19248	-0.0382771	0.000391661	0.0485132	-13.9192	0.194357	-0.0110537	1e-06	0.014995	-11.2678	0.186762	-0.158249	1e-06	0.0490322	-19.2424	0.189286	-0.123541	1e-06	0.0500575	-19.7278
0.71456	2.0126	2.9134	0.193652	-0.0384825	0.00038329	0.0492017	-14.1041	0.194354	-0.0252959	1e-06	0.0151357	-9.29647	0.186577	-0.160468	1e-06	0.0495084	-19.4421	0.189138	-0.125619	1e-06	0.0505429	-19.9253
0.71572	2.0118	2.91408	0.191602	-0.0400191	0.000382361	0.0498837	-14.2764	0.194329	-0.0177314	1e-06	0.0152722	-9.87358	0.186389	-0.162679	1e-06	0.0499823	-19.6411	0.188988	-0.127702	1e-06	0.0510264	-20.1222
0.71688	2.01102	2.91474	0.193359	-0.0393622	0.000397393	0.0505848	-14.4503	0.194314	-0.00724245	1e-06	0.0154108	-12.9089	0.186199	-0.164881	1e-06	0.0504541	-19.8393	0.188836	-0.12979	1e-06	0.0515079	-20.3185
0.71804	2.01028	2.91537	0.193506	-0.040679	0.00043693	0.0513277	-14.6175	0.194285	-0.0211291	1e-06	0.0155469	-9.53765	0.186007	-0.167074	1e-06	0.0509235	-20.0367	0.188681	-0.131883	1e-06	0.0519874	-20.5143
0.7192	2.00956	2.91598	0.193506	-0.0422077	0.000469254	0.0520784	-14.7913	0.194265	-0.0128846	1e-06	0.0156849	-10.7458	0.185812	-0.169258	1e-06	0.0513905	-20.2332	0.188523	-0.133979	1e-06	0.0524648	-20.7095
0.72036	2.00886	2.91657	0.193506	-0.04379	0.000482785	0.0528224	-14.9727	0.194258	0.00470344	1e-06	0.0158256	14.618	0.185614	-0.171432	1e-06	0.0518551	-20.4289	0.188364	-0.136079	1e-06	0.0529401	-20.9039
0.72152	2.00819	2.91714	0.193506	-0.0454278	0.000483738	0.0535257	-15.1447	0.194257	-0.0225248	1e-06	0.0159678	-9.44046	0.185414	-0.173596	1e-06	0.0523172	-20.6236	0.188201	-0.138182	1e-06	0.0534131	-21.0977
0.72268	2.00755	2.91769	0.193506	-0.0471234	0.000489936	0.0542133	-15.309	0.194234	-0.0152158	1e-06	0.0161058	-10.2513	0.185211	-0.17575	1e-06	0.0527768	-20.8175	0.188037	-0.140287	1e-06	0.0538838	-21.2908
0.72384	2.00693	2.91821	0.193359	-0.0488787	0.000513781	0.0549132	-15.4713	0.194223	-0.00332598	1e-06	0.016246	-15.8398	0.185006	-0.177893	1e-06	0.0532337	-21.0104	0.187869	-0.142394	1e-06	0.0543521	-21.4831
0.725	2.00634	2.91871	0.193359	-0.0505358	0.000559954	0.0556479	-15.6388	0.194205	-0.0113868	1e-06	0.0163853	-11.1624	0.184799	-0.180025	1e-06	0.0536881	-21.2023	0.1877	-0.144501	1e-06	0.054818	-21.6747
0.72616	2.00577	2.91919	0.193506	-0.0522571	0.000597521	0.0563874	-15.8136	0.1942	-0.0310816	1e-06	0.0165272	-9.12973	0.184589	-0.182146	1e-06	0.0541397	-21.3932	0.187528	-0.14661	1e-06	0.0552814	-21.8654
0.72732	2.00523	2.91965	0.193506	-0.054205	0.000616458	0.0571202	-15.9961	0.194167	-0.0256084	1e-06	0.0166633	-9.28353	0.184376	-0.184256	1e-06	0.0545885	-21.5831	0.187353	-0.148719	1e-06	0.0557422	-22.0553
0.72848	2.00472	2.92008	0.193213	-0.0562217	0.000622212	0.0578163	-16.1725	0.194141	-0.0196984	1e-06	0.0168008	-9.65957	0.184161	-0.186354	1e-06	0.0550346	-21.7719	0.187176	-0.150827	1e-06	0.0562005	-22.2444
0.72964	2.00424	2.9205	0.193213	-0.0579891	0.000620989	0.0584819	-16.3425	0.194122	-0.0123341	1e-06	0.0169401	-10.8887	0.183944	-0.188441	1e-06	0.0554778	-21.9597	0.186996	-0.152935	1e-06	0.0566561	-22.4325
0.7308	2.00378	2.92089	0.192773	-0.0598302	0.000633706	0.0591536	-16.5094	0.194114	0.00389259	1e-06	0.017082	15.308	0.183724	-0.190515	1e-06	0.0559181	-22.1463	0.186814	-0.155042	1e-06	0.0571089	-22.6197
0.73196	2.00334	2.92125	0.193213	-0.0612663	0.000668904	0.0598547	-16.6789	0.194111	-0.025924	1e-06	0.0172249	-9.27103	0.183502	-0.192577	1e-06	0.0563555	-22.3319	0.18663	-0.157147	1e-06	0.057559	-22.806
0.73312	2.00293	2.9216	0.19292	-0.0632611	0.000694084	0.0605605	-16.8541	0.194084	-0.0206419	1e-06	0.0173625	-9.5764	0.183277	-0.194626	1e-06	0.0567899	-22.5164	0.186443	-0.159249	1e-06	0.0580062	-22.9913
0.73428	2.00255	2.92192	0.19292	-0.0650157	0.000711603	0.0612781	-17.0402	0.194063	-0.0143027	1e-06	0.0175017	-10.4257	0.18305	-0.196663	1e-06	0.0572212	-22.6996	0.186253	-0.16135	1e-06	0.0584505	-23.1756
0.73544	2.0022	2.92222	0.193652	-0.0668527	0.000716061	0.0619642	-17.2202	0.194052	-0.00343896	1e-06	0.017643	-15.7303	0.182821	-0.198686	1e-06	0.0576495	-22.8818	0.186061	-0.163447	1e-06	0.0588919	-23.3588
0.7366	2.00187	2.9225	0.193359	-0.0695761	0.000712885	0.0626104	-17.3885	0.194033	-0.0133218	1e-06	0.0177827	-10.6401	0.182589	-0.200696	1e-06	0.0580747	-23.0627	0.185867	-0.165541	1e-06	0.0593303	-23.5411
0.73776	2.00157	2.92276	0.19292	-0.0720672	0.000719119	0.0632517	-17.5564	0.194023	-0.00130595	1e-06	0.0179245	-18.1279	0.182355	-0.202693	1e-06	0.0584967	-23.2424	0.18567	-0.16763	1e-06	0.0597656	-23.7222
0.73892	2.00129	2.92299	0.19292	-0.0741689	0.000744066	0.0639144	-17.7285	0.19401	-0.0084785	1e-06	0.0180655	-12.2762	0.182119	-0.204676	1e-06	0.0589156	-23.4209	0.185471	-0.169716	1e-06	0.0601978	-23.9022
0.74008	2.00105	2.9232	0.191748	-0.0763648	0.000766065	0.0645854	-17.9077	0.19401	-0.0204044	1e-06	0.0182097	-9.5963	0.18188	-0.206646	1e-06	0.0593312	-23.5981	0.185269	-0.171797	1e-06	0.0606269	-24.0812
0.74124	2.00082	2.92339	0.192627	-0.0773752	0.000780495	0.0652593	-18.0944	0.19399	-0.0149427	1e-06	0.018349	-10.3011	0.18164	-0.208601	1e-06	0.0597436	-23.7741	0.185065	-0.173872	1e-06	0.0610528	-24.2589
0.7424	2.00063	2.92356	0.192773	-0.0794456	0.000778851	0.0659115	-18.2755	0.193977	-0.00624026	1e-06	0.0184902	-13.5106	0.181396	-0.210542	1e-06	0.0601526	-23.9488	0.184858	-0.175943	1e-06	0.0614755	-24.4355
0.74356	2.00046	2.9237	0.192773	-0.0817772	0.000769653	0.0665218	-18.4447	0.193948	-0.0225027	1e-06	0.0186276	-9.44185	0.181151	-0.212469	1e-06	0.0605584	-24.1222	0.184649	-0.178007	1e-06	0.0618948	-24.6109
0.74472	2.00032	2.92382	0.192041	-0.0842125	0.000768387	0.0671228	-18.6093	0.193924	-0.0180781	1e-06	0.0187662	-9.83136	0.180904	-0.214381	1e-06	0.0609608	-24.2943	0.184438	-0.180065	1e-06	0.0623109	-24.7851
0.74588	2.0002	2.92392	0.18999	-0.0859533	0.000782798	0.0677409	-18.7769	0.193906	-0.0122986	1e-06	0.0189061	-10.8983	0.180654	-0.216279	1e-06	0.0613598	-24.4651	0.184224	-0.182117	1e-06	0.0627235	-24.9581
0.74704	2.00011	2.924	0.191162	-0.0855589	0.000806707	0.0683705	-18.944	0.193898	-0.000334171	1e-06	0.0190482	-19.4872	0.180402	-0.218161	1e-06	0.0617554	-24.6345	0.184008	-0.184161	1e-06	0.0631328	-25.1298
0.7482	2.00005	2.92405	0.19292	-0.0865556	0.000821549	0.069001	-19.1023	0.193886	-0.00743266	1e-06	0.0191896	-12.8041	0.180148	-0.220029	1e-06	0.0621475	-24.8026	0.183789	-0.186199	1e-06	0.0635386	-25.3003
0.74936	2.00001	2.92408	0.192188	-0.0895858	0.000821918	0.069609	-19.2532	0.193888	-0.0179293	1e-06	0.0193345	-9.84923	0.179891	-0.221881	1e-06	0.0625362	-24.9693	0.183568	-0.188228	1e-06	0.063941	-25.4695
0.75052	2	2.92409	0.19248	-0.0919282	0.000814014	0.0701713	-19.396	0.19387	-0.0127599	1e-06	0.0194743	-10.7772	0.179633	-0.223718	1e-06	0.0629213	-25.1346	0.183345	-0.19025	1e-06	0.0643398	-25.6373
0.75168	2.00002	2.92407	0.192041	-0.0947079	0.0008048	0.0707058	-19.5305	0.19386	-0.00281665	1e-06	0.019616	-16.356	0.179372	-0.225539	1e-06	0.063303	-25.2986	0.183119	-0.192263	1e-06	0.064735	-25.8039
0.75284	2.00006	2.92404	0.191455	-0.0971269	0.00081131	0.0712501	-19.6665	0.193841	-0.0140726	1e-06	0.0197555	-10.4733	0.17911	-0.227345	1e-06	0.0636811	-25.4611	0.182891	-0.194267	1e-06	0.0651267	-25.9691
0.754	2.00013	2.92398	0.192041	-0.099028	0.000838975	0.0718284	-19.8088	0.193828	-0.00650092	1e-06	0.0198965	-13.3457	0.178845	-0.229136	1e-06	0.0640556	-25.6222	0.182661	-0.196263	1e-06	0.0655147	-26.1329
0.75516	2.00023	2.9239	0.191455	-0.101696	0.000856839	0.0724041	-19.9544	0.193833	-0.0150138	1e-06	0.0200419	-10.288	0.178578	-0.23091	1e-06	0.0644265	-25.7819	0.182428	-0.198249	1e-06	0.0658991	-26.2954
0.75632	2.00035	2.92379	0.191602	-0.103852	0.000885845	0.0729919	-20.1036	0.193819	-0.00881474	1e-06	0.0201824	-12.1225	0.178309	-0.232668	1e-06	0.0647939	-25.9401	0.182193	-0.200225	1e-06	0.0662798	-26.4564
0.75748	2.0005	2.92367	0.191748	-0.1063	0.000904333	0.073529	-20.2379	0.193816	-0.0275961	1e-06	0.0203258	-9.21344	0.178038	-0.23441	1e-06	0.0651575	-26.0969	0.181956	-0.202192	1e-06	0.0666568	-26.6161
0.75864	2.00067	2.92352	0.191162	-0.109043	0.000919302	0.0740332	-20.3629	0.193785	-0.0256369	1e-06	0.0204616	-9.28238	0.177765	-0.236136	1e-06	0.0655176	-26.2523	0.181717	-0.204149	1e-06	0.06703	-26.7744
0.7598	2.00087	2.92335	0.191309	-0.111284	0.000947816	0.0745399	-20.4865	0.193757	-0.0236206	1e-06	0.0205979	-9.37664	0.17749	-0.237846	1e-06	0.0658739	-26.4062	0.181475	-0.206095	1e-06	0.0673995	-26.9312
0.76096	2.0011	2.92315	0.191309	-0.113826	0.000967441	0.0750452	-20.615	0.193731	-0.0214729	1e-06	0.0207347	-9.51188	0.177214	-0.239539	1e-06	0.0662266	-26.5586	0.181231	-0.20803	1e-06	0.0677651	-27.0866
0.76212	2.00136	2.92294	0.191748	-0.116512	0.000975879	0.0755466	-20.7502	0.193707	-0.0190658	1e-06	0.0208721	-9.72196	0.176935	-0.241216	1e-06	0.0665756	-26.7095	0.180984	-0.209954	1e-06	0.068127	-27.2405
0.76328	2.00164	2.9227	0.191016	-0.119828	0.000996383	0.0760508	-20.8843	0.193687	-0.0161424	1e-06	0.0210102	-10.0962	0.176654	-0.242876	1e-06	0.0669208	-26.8589	0.180736	-0.211867	1e-06	0.068485	-27.3929
0.76444	2.00195	2.92244	0.191162	-0.122494	0.00100729	0.0765068	-21.0104	0.19367	-0.0120406	1e-06	0.0211491	-10.9695	0.176371	-0.24452	1e-06	0.0672623	-27.0068	0.180485	-0.213768	1e-06	0.0688391	-27.5439
0.7656	2.00228	2.92215	0.189551	-0.125475	0.0010148	0.0769328	-21.1293	0.19366	-0.00380092	1e-06	0.0212897	-15.3911	0.176087	-0.246147	1e-06	0.0676001	-27.1532	0.180232	-0.215658	1e-06	0.0691893	-27.6933
0.76676	2.00264	2.92185	0.190576	-0.126853	0.0010414	0.0773828	-21.2538	0.193637	-0.0188346	1e-06	0.0214266	-9.74619	0.1758	-0.247757	1e-06	0.0679341	-27.2981	0.179977	-0.217535	1e-06	0.0695357	-27.8413
0.76792	2.00303	2.92152	0.191309	-0.129514	0.00105459	0.077825	-21.3771	0.193616	-0.016453	1e-06	0.021564	-10.0486	0.175512	-0.24935	1e-06	0.0682644	-27.4415	0.179719	-0.2194	1e-06	0.0698781	-27.9877
0.76908	2.00344	2.92117	0.190283	-0.133141	0.00106677	0.0782745	-21.5071	0.193599	-0.0132094	1e-06	0.0217021	-10.6667	0.175222	-0.250925	1e-06	0.0685908	-27.5833	0.17946	-0.221253	1e-06	0.0702165	-28.1327
0.77024	2.00388	2.92079	0.190283	-0.135814	0.00107486	0.0786862	-21.6323	0.193586	-0.00755772	1e-06	0.0218414	-12.7368	0.17493	-0.252484	1e-06	0.0689135	-27.7236	0.179198	-0.223093	1e-06	0.070551	-28.276
0.7714	2.00435	2.9204	0.188672	-0.13866	0.00107655	0.079056	-21.7465	0.193585	-0.024869	1e-06	0.0219839	-9.31512	0.174636	-0.254026	1e-06	0.0692324	-27.8624	0.178934	-0.22492	1e-06	0.0708816	-28.4179
0.77256	2.00484	2.91998	0.189844	-0.139919	0.00107726	0.0794061	-21.8571	0.193557	-0.0243031	1e-06	0.0221183	-9.34165	0.17434	-0.255551	1e-06	0.0695474	-27.9996	0.178668	-0.226734	1e-06	0.0712081	-28.5582
0.77372	2.00536	2.91954	0.190137	-0.142638	0.0010925	0.0797694	-21.9605	0.193529	-0.0238055	1e-06	0.0222526	-9.36682	0.174043	-0.257058	1e-06	0.0698587	-28.1353	0.1784	-0.228534	1e-06	0.0715306	-28.6969
0.77488	2.00591	2.91908	0.189258	-0.145859	0.0010936	0.0801248	-22.0708	0.193502	-0.0233802	1e-06	0.0223868	-9.38979	0.173744	-0.258549	1e-06	0.0701662	-28.2694	0.17813	-0.230321	1e-06	0.0718492	-28.834
0.77604	2.00648	2.91859	0.189258	-0.148302	0.00108523	0.0804726	-22.1888	0.193475	-0.0230334	1e-06	0.022521	-9.4096	0.173443	-0.260021	1e-06	0.0704698	-28.4019	0.177858	-0.232094	1e-06	0.0721637	-28.9696
0.7772	2.00708	2.91809	0.188965	-0.150934	0.00108906	0.080818	-22.3012	0.193448	-0.0227734	1e-06	0.0226549	-9.42509	0.173141	-0.261477	1e-06	0.0707696	-28.5329	0.177583	-0.233853	1e-06	0.0724741	-29.1036
0.77836	2.0077	2.91756	0.188965	-0.153438	0.00108496	0.0811164	-22.4008	0.193422	-0.0226117	1e-06	0.0227887	-9.43503	0.172837	-0.262915	1e-06	0.0710655	-28.6624	0.177307	-0.235598	1e-06	0.0727805	-29.236
0.77952	2.00835	2.91701	0.188672	-0.156135	0.00107989	0.0813923	-22.4933	0.193396	-0.0225624	1e-06	0.0229223	-9.4381	0.172531	-0.264336	1e-06	0.0713576	-28.7902	0.177029	-0.237328	1e-06	0.0730829	-29.3668
0.78068	2.00902	2.91643	0.188379	-0.158711	0.00108702	0.0816754	-22.5856	0.19337	-0.0226427	1e-06	0.0230556	-9.43311	0.172223	-0.265739	1e-06	0.0716459	-28.9165	0.176748	-0.239045	1e-06	0.0733812	-29.496
0.78184	2.00973	2.91584	0.188232	-0.161167	0.00109009	0.0819545	-22.6805	0.193343	-0.022872	1e-06	0.0231885	-9.41915	0.171914	-0.267125	1e-06	0.0719304	-29.0412	0.176466	-0.240746	1e-06	0.0736754	-29.6236
0.783	2.01045	2.91522	0.188232	-0.163668	0.00108058	0.0822238	-22.7789	0.193316	-0.0232714	1e-06	0.0233211	-9.3959	0.171604	-0.268493	1e-06	0.072211	-29.1644	0.176182	-0.242432	1e-06	0.0739655	-29.7496
0.78416	2.01121	2.91458	0.187939	-0.166376	0.00108094	0.0824967	-22.8755	0.193289	-0.0238615	1e-06	0.0234531	-9.36389	0.171291	-0.269844	1e-06	0.0724877	-29.286	0.175896	-0.244104	1e-06	0.0742516	-29.874
0.78532	2.01199	2.91392	0.187793	-0.168975	0.00107103	0.0827201	-22.9597	0.193261	-0.0246608	1e-06	0.0235847	-9.32463	0.170978	-0.271177	1e-06	0.0727606	-29.406	0.175607	-0.24576	1e-06	0.0745336	-29.9967
0.78648	2.01279	2.91324	0.187207	-0.171628	0.00105782	0.0829153	-23.0361	0.193232	-0.0256827	1e-06	0.0237156	-9.28053	0.170662	-0.272493	1e-06	0.0730297	-29.5244	0.175317	-0.247402	1e-06	0.0748115	-30.1179
0.78764	2.01363	2.91253	0.1875	-0.173858	0.0010498	0.0831096	-23.112	0.193201	-0.0269344	1e-06	0.0238458	-9.2346	0.170345	-0.273791	1e-06	0.0732949	-29.6412	0.175025	-0.249027	1e-06	0.0750854	-30.2374
0.7888	2.01448	2.9118	0.187061	-0.176629	0.00105782	0.0833265	-23.1893	0.193169	-0.028416	1e-06	0.0239751	-9.18985	0.170027	-0.275072	1e-06	0.0735563	-29.7565	0.174732	-0.250637	1e-06	0.0753551	-30.3553
0.78996	2.01537	2.91106	0.186914	-0.179144	0.00105012	0.0835283	-23.2714	0.193135	-0.0301207	1e-06	0.0241035	-9.14881	0.169707	-0.276335	1e-06	0.0738139	-29.8702	0.174436	-0.252232	1e-06	0.0756208	-30.4715
0.79112	2.01628	2.91028	0.187061	-0.181725	0.00104915	0.0837362	-23.3542	0.193099	-0.0320369	1e-06	0.0242309	-9.11318	0.169386	-0.277581	1e-06	0.0740676	-29.9823	0.174138	-0.253811	1e-06	0.0758823	-30.5862
0.79228	2.01721	2.90949	0.186475	-0.184698	0.00106732	0.0839256	-23.4222	0.193061	-0.0341499	1e-06	0.0243572	-9.08369	0.169063	-0.278809	1e-06	0.0743175	-30.0928	0.173839	-0.255373	1e-06	0.0761398	-30.6991
0.79344	2.01817	2.90868	0.186328	-0.187264	0.00108062	0.0840814	-23.483	0.19302	-0.0364443	1e-06	0.0244823	-9.0603	0.168739	-0.280019	1e-06	0.0745636	-30.2017	0.173538	-0.25692	1e-06	0.0763932	-30.8105
0.7946	2.01916	2.90784	0.186035	-0.189907	0.00109373	0.0842253	-23.541	0.192976	-0.0389055	1e-06	0.0246061	-9.04242	0.168414	-0.281212	1e-06	0.0748058	-30.3091	0.173235	-0.258451	1e-06	0.0766425	-30.9202
0.79576	2.02017	2.90698	0.185742	-0.19247	0.00112138	0.084387	-23.6016	0.19293	-0.0415202	1e-06	0.0247286	-9.0292	0.168087	-0.282387	1e-06	0.0750442	-30.4149	0.17293	-0.259965	1e-06	0.0768878	-31.0283
0.79692	2.0212	2.9061	0.186768	-0.194958	0.00113261	0.0845335	-23.666	0.19288	-0.0442776	1e-06	0.0248497	-9.01969	0.167759	-0.283545	1e-06	0.0752789	-30.5191	0.172624	-0.261463	1e-06	0.077129	-31.1347
0.79808	2.02227	2.9052	0.185596	-0.198815	0.00114604	0.084685	-23.7328	0.192827	-0.0471685	1e-06	0.0249692	-9.01303	0.167429	-0.284686	1e-06	0.0755097	-30.6217	0.172316	-0.262945	1e-06	0.0773661	-31.2396
0.79924	2.02335	2.90428	0.185449	-0.201642	0.00117407	0.0848231	-23.7968	0.19277	-0.0501859	1e-06	0.0250872	-9.00847	0.167098	-0.285809	1e-06	0.0757367	-30.7228	0.172006	-0.26441	1e-06	0.0775991	-31.3427
0.8004	2.02447	2.90334	0.185449	-0.204564	0.00119583	0.0849263	-23.853	0.19271	-0.053324	1e-06	0.0252036	-9.00541	0.166766	-0.286914	1e-06	0.0759599	-30.8223	0.171694	-0.265858	1e-06	0.0778281	-31.4443
0.80156	2.0256	2.90237	0.184717	-0.207747	0.00121676	0.0850134	-23.9072	0.192647	-0.0565784	1e-06	0.0253183	-9.0034	0.166432	-0.288002	1e-06	0.0761794	-30.9202	0.171381	-0.26729	1e-06	0.0780531	-31.5442
0.80272	2.02677	2.90138	0.184277	-0.210391	0.00124851	0.0851123	-23.9668	0.192579	-0.0599453	1e-06	0.0254312	-9.0021	0.166098	-0.289073	1e-06	0.076395	-31.0165	0.171066	-0.268705	1e-06	0.078274	-31.6424
0.80388	2.02796	2.90038	0.184131	-0.212822	0.00126246	0.0851953	-24.0311	0.192508	-0.0634218	1e-06	0.0255423	-9.00128	0.165762	-0.290126	1e-06	0.0766069	-31.1113	0.17075	-0.270103	1e-06	0.0784909	-31.7391
0.80504	2.02917	2.89935	0.183838	-0.215362	0.0012749	0.0852795	-24.098	0.192432	-0.0670051	1e-06	0.0256516	-9.00077	0.165425	-0.291162	1e-06	0.0768151	-31.2046	0.170432	-0.271485	1e-06	0.0787037	-31.8341
0.8062	2.03041	2.8983	0.183398	-0.217856	0.00129823	0.0853581	-24.1594	0.192352	-0.0706928	1e-06	0.0257589	-9.00045	0.165086	-0.29218	1e-06	0.0770194	-31.2962	0.170112	-0.272849	1e-06	0.0789126	-31.9275
0.80736	2.03167	2.89723	0.183398	-0.220145	0.00131931	0.0853994	-24.2083	0.192268	-0.0744827	1e-06	0.0258642	-9.00026	0.164747	-0.293182	1e-06	0.0772201	-31.3863	0.169791	-0.274196	1e-06	0.0791174	-32.0192
0.80852	2.03296	2.89613	0.183105	-0.222713	0.00133973	0.0854251	-24.2518	0.192179	-0.0783726	1e-06	0.0259675	-9.00015	0.164406	-0.294166	1e-06	0.077417	-31.4749	0.169468	-0.275527	1e-06	0.0793183	-32.1093
0.80968	2.03427	2.89502	0.18252	-0.225244	0.00136106	0.0854477	-24.296	0.192086	-0.0823605	1e-06	0.0260686	-9.00009	0.164064	-0.295132	1e-06	0.0776102	-31.5619	0.169144	-0.27684	1e-06	0.0795152	-32.1979
0.81084	2.03561	2.89389	0.182373	-0.227419	0.00136162	0.0854532	-24.3455	0.191988	-0.0864441	1e-06	0.0261676	-9.00005	0.163721	-0.296082	1e-06	0.0777997	-31.6474	0.168818	-0.278136	1e-06	0.0797081	-32.2847
0.812	2.03697	2.89273	0.182227	-0.229722	0.00134762	0.0854441	-24.3963	0.191885	-0.0906214	1e-06	0.0262644	-9.00003	0.163377	-0.297014	1e-06	0.0779855	-31.7313	0.168491	-0.279415	1e-06	0.079897	-32.37
0.81316	2.03836	2.89155	0.181934	-0.232157	0.00134307	0.0854349	-24.4435	0.191778	-0.0948901	1e-06	0.0263589	-9.00001	0.163032	-0.29793	1e-06	0.0781675	-31.8137	0.168162	-0.280676	1e-06	0.080082	-32.4537
0.81432	2.03977	2.89036	0.181641	-0.234566	0.00135801	0.0854125	-24.4775	0.191665	-0.0992482	1e-06	0.0264512	-9.00001	0.162686	-0.298828	1e-06	0.078346	-31.8945	0.167832	-0.281921	1e-06	0.0802631	-32.5357
0.81548	2.04121	2.88914	0.181201	-0.236953	0.00137002	0.0853707	-24.5067	0.191547	-0.103693	1e-06	0.026541	-9	0.162339	-0.299709	1e-06	0.0785207	-31.9738	0.167501	-0.283148	1e-06	0.0804402	-32.6162
0.81664	2.04267	2.8879	0.181641	-0.239159	0.00138452	0.0853234	-24.534	0.191425	-0.108223	1e-06	0.0266284	-9	0.161991	-0.300574	1e-06	0.0786918	-32.0516	0.167168	-0.284358	1e-06	0.0806135	-32.6951
0.8178	2.04415	2.88664	0.179443	-0.242149	0.00138991	0.0852628	-24.561	0.191296	-0.112835	1e-06	0.0267134	-9	0.161642	-0.301421	1e-06	0.0788592	-32.1279	0.166833	-0.28555	1e-06	0.0807829	-32.7723
0.81896	2.04566	2.88536	0.181641	-0.243043	0.00137535	0.0851825	-24.5952	0.191163	-0.117527	1e-06	0.0267959	-9	0.161292	-0.302252	1e-06	0.079023	-32.2026	0.166498	-0.286725	1e-06	0.0809483	-32.848
0.82012	2.04719	2.88406	0.179883	-0.246649	0.00136717	0.0851035	-24.6196	0.191024	-0.122297	1e-06	0.0268758	-9	0.160941	-0.303065	1e-06	0.0791832	-32.2759	0.16616	-0.287883	1e-06	0.0811099	-32.9221
0.82128	2.04875	2.88274	0.179883	-0.248645	0.0013762	0.0850108	-24.6393	0.190879	-0.127142	1e-06	0.0269532	-9	0.160589	-0.303862	1e-06	0.0793398	-32.3476	0.165822	-0.289024	1e-06	0.0812677	-32.9946
0.82244	2.05033	2.8814	0.179443	-0.250957	0.00138076	0.0848951	-24.6513	0.190729	-0.13206	1e-06	0.0270279	-9	0.160236	-0.304642	1e-06	0.0794928	-32.4178	0.165482	-0.290147	1e-06	0.0814217	-33.0655
0.8236	2.05193	2.88004	0.179736	-0.253106	0.00138473	0.084771	-24.6619	0.190573	-0.137048	1e-06	0.0270999	-9	0.159882	-0.305406	1e-06	0.0796422	-32.4865	0.165141	-0.291252	1e-06	0.0815718	-33.1349
0.82476	2.05356	2.87866	0.178857	-0.255897	0.00139896	0.08466	-24.6735	0.190411	-0.142103	1e-06	0.0271692	-9	0.159527	-0.306153	1e-06	0.079788	-32.5538	0.164799	-0.29234	1e-06	0.0817181	-33.2027
0.82592	2.05521	2.87726	0.178564	-0.258052	0.00139325	0.0845286	-24.6913	0.190243	-0.147224	1e-06	0.0272359	-9	0.159172	-0.306883	1e-06	0.0799302	-32.6195	0.164456	-0.293411	1e-06	0.0818607	-33.2689
0.82708	2.05689	2.87584	0.17959	-0.260213	0.00138852	0.0843975	-24.7097	0.190069	-0.152406	1e-06	0.0272997	-9	0.158815	-0.307597	1e-06	0.080069	-32.6838	0.164111	-0.294465	1e-06	0.0819994	-33.3336
0.82824	2.05859	2.87439	0.177686	-0.263826	0.00139948	0.0842535	-24.7162	0.189889	-0.157649	1e-06	0.0273607	-9	0.158458	-0.308295	1e-06	0.0802042	-32.7465	0.163765	-0.295501	1e-06	0.0821345	-33.3967
0.8294	2.06031	2.87293	0.177686	-0.265691	0.00143544	0.0841011	-24.7169	0.189703	-0.162948	1e-06	0.027419	-9	0.1581	-0.308976	1e-06	0.0803359	-32.8078	0.163418	-0.29652	1e-06	0.0822658	-33.4583
0.83056	2.06206	2.87145	0.1771	-0.267893	0.0014701	0.0839376	-24.7131	0.189511	-0.168302	1e-06	0.0274743	-9	0.157741	-0.309641	1e-06	0.080464	-32.8677	0.16307	-0.297521	1e-06	0.0823934	-33.5183
0.83172	2.06383	2.86995	0.176953	-0.269794	0.00150584	0.0837745	-24.7107	0.189313	-0.173707	1e-06	0.0275269	-9	0.157382	-0.310289	1e-06	0.0805887	-32.926	0.162721	-0.298505	1e-06	0.0825172	-33.5769
0.83288	2.06562	2.86843	0.176514	-0.271877	0.00152177	0.0835899	-24.709	0.189108	-0.179161	1e-06	0.0275765	-9	0.157021	-0.310921	1e-06	0.0807099	-32.9829	0.16237	-0.299472	1e-06	0.0826375	-33.6339
0.83404	2.06743	2.86689	0.176221	-0.273824	0.00153574	0.083403	-24.7084	0.188897	-0.184661	1e-06	0.0276232	-9	0.15666	-0.311538	1e-06	0.0808277	-33.0384	0.162019	-0.300421	1e-06	0.082754	-33.6893
0.8352	2.06927	2.86533	0.175928	-0.275798	0.00156017	0.0832103	-24.7008	0.18868	-0.190205	1e-06	0.027667	-9	0.156298	-0.312138	1e-06	0.080942	-33.0924	0.161666	-0.301354	1e-06	0.0828669	-33.7433
0.83636	2.07113	2.86375	0.175342	-0.277801	0.00160748	0.0830203	-24.6838	0.188456	-0.195788	1e-06	0.0277078	-9	0.155936	-0.312722	1e-06	0.0810529	-33.145	0.161312	-0.302269	1e-06	0.0829762	-33.7958
0.83752	2.07302	2.86216	0.175342	-0.279516	0.00165448	0.0828194	-24.6633	0.188226	-0.20141	1e-06	0.0277457	-9	0.155573	-0.31329	1e-06	0.0811604	-33.1961	0.160958	-0.303166	1e-06	0.0830819	-33.8467
0.83868	2.07492	2.86054	0.175195	-0.281586	0.00170124	0.0826159	-24.6413	0.187989	-0.207066	1e-06	0.0277807	-9	0.155209	-0.313842	1e-06	0.0812644	-33.2458	0.160602	-0.304047	1e-06	0.083184	-33.8962
0.83984	2.07685	2.8589	0.174609	-0.283853	0.00172458	0.0823887	-24.6226	0.187745	-0.212754	1e-06	0.0278126	-9	0.154845	-0.314379	1e-06	0.0813651	-33.2941	0.160245	-0.30491	1e-06	0.0832825	-33.9442
0.841	2.0788	2.85725	0.174023	-0.28584	0.00174311	0.0821569	-24.6073	0.187495	-0.218472	1e-06	0.0278417	-9	0.15448	-0.3149	1e-06	0.0814624	-33.341	0.159887	-0.305757	1e-06	0.0833775	-33.9907
0.84216	2.08078	2.85557	0.17373	-0.287547	0.0017708	0.0819224	-24.5876	0.187238	-0.224216	1e-06	0.0278677	-9	0.154114	-0.315405	1e-06	0.0815563	-33.3864	0.159529	-0.306586	1e-06	0.0834689	-34.0357
0.84332	2.08277	2.85388	0.173437	-0.2893	0.00181855	0.0816896	-24.5586	0.186975	-0.229983	1e-06	0.0278908	-9	0.153748	-0.315894	1e-06	0.0816469	-33.4305	0.159169	-0.307398	1e-06	0.0835568	-34.0793
0.84448	2.08479	2.85217	0.173291	-0.291098	0.00186549	0.0814474	-24.5262	0.186705	-0.235771	1e-06	0.0279109	-9	0.153381	-0.316368	1e-06	0.0817342	-33.4731	0.158809	-0.308193	1e-06	0.0836413	-34.1214
0.84564	2.08683	2.85044	0.172705	-0.293107	0.00191245	0.0812025	-24.4932	0.186428	-0.241576	1e-06	0.0279281	-9	0.153014	-0.316826	1e-06	0.0818182	-33.5144	0.158447	-0.308971	1e-06	0.0837222	-34.1621
0.8468	2.0889	2.84869	0.172266	-0.294845	0.00193237	0.080932	-24.4648	0.186144	-0.247397	1e-06	0.0279423	-9	0.152646	-0.317269	1e-06	0.0818988	-33.5542	0.158085	-0.309733	1e-06	0.0837998	-34.2013
0.84796	2.09098	2.84692	0.172266	-0.296478	0.00193227	0.0806465	-24.4405	0.185854	-0.25323	1e-06	0.0279536	-9	0.152278	-0.317697	1e-06	0.0819762	-33.5927	0.157722	-0.310477	1e-06	0.0838739	-34.2391
0.84912	2.09309	2.84514	0.171973	-0.298486	0.00193847	0.0803611	-24.413	0.185557	-0.259072	1e-06	0.0279619	-9	0.151909	-0.318109	1e-06	0.0820503	-33.6298	0.157358	-0.311205	1e-06	0.0839445	-34.2754
0.85028	2.09521	2.84333	0.170801	-0.300553	0.00196415	0.080077	-24.3787	0.185253	-0.264921	1e-06	0.0279673	-9	0.15154	-0.318506	1e-06	0.0821212	-33.6655	0.156993	-0.311916	1e-06	0.0840118	-34.3104
0.85144	2.09736	2.84151	0.170801	-0.30172	0.00201633	0.0798116	-24.3419	0.184942	-0.270773	1e-06	0.0279699	-9	0.15117	-0.318888	1e-06	0.0821888	-33.6999	0.156628	-0.31261	1e-06	0.0840757	-34.3439
0.8526	2.09953	2.83967	0.170508	-0.303269	0.00206873	0.0795422	-24.3007	0.184625	-0.276627	1e-06	0.0279696	-9	0.1508	-0.319255	1e-06	0.0822532	-33.7329	0.156261	-0.313287	1e-06	0.0841363	-34.376
0.85376	2.10172	2.83781	0.170215	-0.304882	0.00209042	0.0792397	-24.2609	0.1843	-0.282479	1e-06	0.0279664	-9	0.15043	-0.319607	1e-06	0.0823144	-33.7646	0.155894	-0.313948	1e-06	0.0841935	-34.4067
0.85492	2.10394	2.83593	0.169629	-0.306562	0.00208917	0.0789131	-24.2227	0.183969	-0.288327	1e-06	0.0279603	-9	0.150059	-0.319944	1e-06	0.0823724	-33.7949	0.155526	-0.314593	1e-06	0.0842474	-34.4361
0.85608	2.10617	2.83404	0.170215	-0.30799	0.00208978	0.0785866	-24.1846	0.183631	-0.294167	1e-06	0.0279515	-9	0.149687	-0.320266	1e-06	0.0824272	-33.8239	0.155158	-0.315221	1e-06	0.084298	-34.464
0.85724	2.10842	2.83213	0.169922	-0.31045	0.00210543	0.0782608	-24.1388	0.183287	-0.299998	1e-06	0.0279399	-9	0.149316	-0.320573	1e-06	0.0824789	-33.8516	0.154789	-0.315832	1e-06	0.0843453	-34.4906
0.8584	2.1107	2.8302	0.170068	-0.312983	0.00214697	0.0779506	-24.0926	0.182935	-0.305816	1e-06	0.0279255	-9	0.148944	-0.320865	1e-06	0.0825274	-33.8779	0.154419	-0.316427	1e-06	0.0843894	-34.5158
0.85956	2.113	2.82825	0.169629	-0.316075	0.00218656	0.0776348	-24.0515	0.182577	-0.311619	1e-06	0.0279085	-9	0.148571	-0.321143	1e-06	0.0825728	-33.9029	0.154048	-0.317006	1e-06	0.0844303	-34.5396
0.86072	2.11531	2.82628	0.167871	-0.319086	0.00221187	0.0772905	-24.0155	0.182213	-0.317405	1e-06	0.0278887	-9	0.148199	-0.321406	1e-06	0.082615	-33.9266	0.153677	-0.317568	1e-06	0.0844679	-34.5621
0.86188	2.11765	2.8243	0.167432	-0.320579	0.00221518	0.0769219	-23.9898	0.181841	-0.323171	1e-06	0.0278663	-9	0.147826	-0.321655	1e-06	0.0826542	-33.949	0.153305	-0.318115	1e-06	0.0845023	-34.5833
0.86304	2.12001	2.8223	0.16582	-0.321998	0.00221663	0.0765509	-23.9647	0.181463	-0.328913	1e-06	0.0278412	-9	0.147452	-0.321889	1e-06	0.0826903	-33.97	0.152932	-0.318645	1e-06	0.0845336	-34.6031
0.8642	2.12238	2.82029	0.166553	-0.322062	0.00222939	0.0761811	-23.9348	0.181078	-0.334631	1e-06	0.0278136	-9	0.147079	-0.322109	1e-06	0.0827233	-33.9898	0.152559	-0.319159	1e-06	0.0845617	-34.6216
0.86536	2.12478	2.81825	0.16626	-0.323337	0.00226666	0.0758282	-23.8922	0.180686	-0.340321	1e-06	0.0277835	-9	0.146705	-0.322315	1e-06	0.0827532	-34.0083	0.152186	-0.319658	1e-06	0.0845867	-34.6387
0.86652	2.1272	2.8162	0.16582	-0.324701	0.00230989	0.0754723	-23.8452	0.180288	-0.345981	1e-06	0.0277508	-9	0.146331	-0.322506	1e-06	0.0827801	-34.0255	0.151812	-0.32014	1e-06	0.0846085	-34.6546
0.86768	2.12964	2.81413	0.165527	-0.325997	0.00235293	0.0751154	-23.7983	0.179884	-0.351609	1e-06	0.0277157	-9	0.145957	-0.322683	1e-06	0.082804	-34.0415	0.151437	-0.320606	1e-06	0.0846273	-34.6691
0.86884	2.13209	2.81205	0.165234	-0.327386	0.00236408	0.0747291	-23.7551	0.179473	-0.357202	1e-06	0.0276781	-9	0.145583	-0.322846	1e-06	0.0828249	-34.0561	0.151062	-0.321057	1e-06	0.084643	-34.6824
0.87	2.13457	2.80995	0.164502	-0.32887	0.00237046	0.0743378	-23.7131	0.179055	-0.362757	1e-06	0.0276382	-9	0.145208	-0.322995	1e-06	0.0828428	-34.0696	0.150686	-0.321492	1e-06	0.0846556	-34.6943
0.87116	2.13706	2.80783	0.164209	-0.32997	0.0023837	0.073947	-23.6696	0.178631	-0.368274	1e-06	0.027596	-9	0.144833	-0.32313	1e-06	0.0828577	-34.0817	0.15031	-0.321911	1e-06	0.0846652	-34.705
0.87232	2.13958	2.8057	0.164795	-0.331168	0.00241699	0.0735704	-23.6216	0.178201	-0.373749	1e-06	0.0275515	-9	0.144458	-0.323251	1e-06	0.0828696	-34.0926	0.149933	-0.322315	1e-06	0.0846718	-34.7144
0.87348	2.14211	2.80355	0.16333	-0.333428	0.00247968	0.0732189	-23.5697	0.177764	-0.379181	1e-06	0.0275047	-9	0.144083	-0.323358	1e-06	0.0828786	-34.1022	0.149556	-0.322704	1e-06	0.0846753	-34.7225
0.87464	2.14467	2.80139	0.162598	-0.334508	0.0025424	0.0728658	-23.5239	0.177321	-0.384566	1e-06	0.0274557	-9	0.143708	-0.323452	1e-06	0.0828846	-34.1107	0.149179	-0.323077	1e-06	0.0846759	-34.7294
0.8758	2.14724	2.7992	0.162305	-0.335212	0.00257036	0.0724774	-23.4805	0.176872	-0.389904	1e-06	0.0274046	-9	0.143333	-0.323532	1e-06	0.0828878	-34.1178	0.148801	-0.323434	1e-06	0.0846735	-34.735
0.87696	2.14983	2.79701	0.160693	-0.33602	0.00258839	0.0720796	-23.4357	0.176416	-0.395192	1e-06	0.0273514	-9	0.142958	-0.323598	1e-06	0.082888	-34.1238	0.148422	-0.323776	1e-06	0.0846682	-34.7394
0.87812	2.15244	2.79479	0.161572	-0.335491	0.00261124	0.0716833	-23.3878	0.175955	-0.400428	1e-06	0.0272962	-9	0.142582	-0.32365	1e-06	0.0828853	-34.1285	0.148044	-0.324104	1e-06	0.08466	-34.7425
0.87928	2.15507	2.79256	0.161133	-0.33635	0.00265056	0.0712974	-23.3268	0.175487	-0.405611	1e-06	0.027239	-9	0.142207	-0.323689	1e-06	0.0828798	-34.132	0.147665	-0.324416	1e-06	0.0846489	-34.7445
0.88044	2.15771	2.79032	0.16084	-0.337155	0.00271569	0.0709347	-23.2617	0.175014	-0.410738	1e-06	0.0271798	-9	0.141831	-0.323715	1e-06	0.0828714	-34.1343	0.147285	-0.324713	1e-06	0.0846348	-34.7451
0.8816	2.16038	2.78806	0.160547	-0.338068	0.0027827	0.0705706	-23.1941	0.174535	-0.415807	1e-06	0.0271187	-9	0.141456	-0.323727	1e-06	0.0828601	-34.1354	0.146906	-0.324995	1e-06	0.084618	-34.7446
0.88276	2.16306	2.78579	0.160547	-0.339089	0.00281603	0.0701721	-23.1287	0.174049	-0.420817	1e-06	0.0270558	-9	0.14108	-0.323726	1e-06	0.082846	-34.1354	0.146526	-0.325262	1e-06	0.0845982	-34.7429
0.88392	2.16576	2.7835	0.160693	-0.34054	0.00282348	0.0697526	-23.0679	0.173558	-0.425766	1e-06	0.0269911	-9	0.140705	-0.323712	1e-06	0.0828291	-34.1341	0.146145	-0.325514	1e-06	0.0845757	-34.74
0.88508	2.16848	2.78119	0.159375	-0.342584	0.00283139	0.0693326	-23.0099	0.173062	-0.430653	1e-06	0.0269246	-9	0.140329	-0.323685	1e-06	0.0828094	-34.1316	0.145765	-0.325752	1e-06	0.0845503	-34.7358
0.88624	2.17121	2.77887	0.159521	-0.343621	0.00285217	0.0689231	-22.9569	0.172559	-0.435475	1e-06	0.0268565	-9	0.139954	-0.323644	1e-06	0.0827869	-34.128	0.145384	-0.325975	1e-06	0.0845221	-34.7305
0.8874	2.17396	2.77654	0.158496	-0.345253	0.00289748	0.0685345	-22.9016	0.172051	-0.440231	1e-06	0.0267867	-9	0.139578	-0.323591	1e-06	0.0827616	-34.1231	0.145003	-0.326183	1e-06	0.0844912	-34.724
0.88856	2.17673	2.77419	0.15791	-0.346202	0.00297124	0.0681624	-22.844	0.171538	-0.44492	1e-06	0.0267154	-9	0.139203	-0.323524	1e-06	0.0827335	-34.1172	0.144622	-0.326377	1e-06	0.0844575	-34.7164
0.88972	2.17952	2.77182	0.157471	-0.346949	0.00301311	0.0677575	-22.7895	0.171019	-0.449539	1e-06	0.0266425	-9	0.138828	-0.323445	1e-06	0.0827027	-34.11	0.144241	-0.326556	1e-06	0.0844211	-34.7076
0.89088	2.18233	2.76944	0.157031	-0.347656	0.00302082	0.0673177	-22.7372	0.170495	-0.454089	1e-06	0.0265681	-9	0.138453	-0.323352	1e-06	0.0826692	-34.1017	0.143859	-0.326722	1e-06	0.0843819	-34.6976
0.89204	2.18515	2.76705	0.156738	-0.348323	0.00302537	0.0668743	-22.6848	0.169966	-0.458566	1e-06	0.0264923	-9	0.138078	-0.323248	1e-06	0.082633	-34.0923	0.143477	-0.326872	1e-06	0.0843401	-34.6865
0.8932	2.18799	2.76464	0.156299	-0.349112	0.00303917	0.0664383	-22.6306	0.169431	-0.462971	1e-06	0.0264151	-9	0.137703	-0.32313	1e-06	0.082594	-34.0817	0.143096	-0.327009	1e-06	0.0842956	-34.6743
0.89436	2.19084	2.76222	0.155713	-0.349863	0.0030754	0.0660231	-22.5746	0.168892	-0.467301	1e-06	0.0263365	-9	0.137328	-0.323	1e-06	0.0825524	-34.07	0.142714	-0.327132	1e-06	0.0842484	-34.6609
0.89552	2.19371	2.75979	0.15542	-0.350417	0.00314187	0.0656359	-22.5158	0.168347	-0.471555	1e-06	0.0262567	-9	0.136953	-0.322857	1e-06	0.082508	-34.0571	0.142331	-0.32724	1e-06	0.0841985	-34.6464
0.89668	2.1966	2.75734	0.15498	-0.351095	0.0031844	0.0652174	-22.4555	0.167798	-0.475732	1e-06	0.0261757	-9	0.136579	-0.322701	1e-06	0.082461	-34.0431	0.141949	-0.327335	1e-06	0.084146	-34.6307
0.89784	2.1995	2.75488	0.154541	-0.351738	0.00319455	0.0647646	-22.3974	0.167243	-0.479832	1e-06	0.0260934	-9	0.136205	-0.322533	1e-06	0.0824114	-34.028	0.141567	-0.327416	1e-06	0.084091	-34.614
0.899	2.20242	2.7524	0.153955	-0.352346	0.00320021	0.0643058	-22.3393	0.166684	-0.483852	1e-06	0.0260101	-9	0.135831	-0.322353	1e-06	0.0823591	-34.0118	0.141185	-0.327483	1e-06	0.0840333	-34.5962
0.90016	2.20535	2.74991	0.153809	-0.352761	0.00321069	0.0638511	-22.2811	0.166121	-0.487792	1e-06	0.0259256	-9	0.135457	-0.322161	1e-06	0.0823042	-33.9945	0.140802	-0.327536	1e-06	0.083973	-34.5772
0.90132	2.20831	2.74741	0.153809	-0.353463	0.00323917	0.0634139	-22.2206	0.165553	-0.491651	1e-06	0.0258401	-9	0.135083	-0.322001	1e-06	0.0823485	-33.9801	0.14042	-0.327582	1e-06	0.0839799	-34.5803
0.90248	2.21127	2.74489	0.152637	-0.354613	0.00329576	0.0630038	-22.1587	0.16498	-0.495428	1e-06	0.0257537	-9	0.13471	-0.321909	1e-06	0.0823895	-33.9718	0.140037	-0.327627	1e-06	0.0839838	-34.5824
0.90364	2.21425	2.74236	0.15249	-0.354932	0.00336116	0.062597	-22.098	0.164403	-0.499121	1e-06	0.0256662	-9	0.134336	-0.321867	1e-06	0.0824273	-33.9681	0.139655	-0.327671	1e-06	0.0839848	-34.5834
0.9048	2.21725	2.73982	0.152051	-0.35554	0.00339208	0.0621541	-22.0387	0.163822	-0.502731	1e-06	0.0255779	-9	0.133963	-0.321865	1e-06	0.0824618	-33.9679	0.139272	-0.327714	1e-06	0.0839828	-34.5835
0.90596	2.22026	2.73727	0.151611	-0.35612	0.00341101	0.0617003	-21.982	0.163237	-0.506255	1e-06	0.0254887	-9	0.13359	-0.321892	1e-06	0.082493	-33.9702	0.13889	-0.327754	1e-06	0.0839779	-34.5826
0.90712	2.22329	2.7347	0.151172	-0.35667	0.0034327	0.0612473	-21.9256	0.162648	-0.509694	1e-06	0.0253988	-9	0.133216	-0.321938	1e-06	0.0825208	-33.9745	0.138507	-0.327791	1e-06	0.0839702	-34.5807
0.90828	2.22633	2.73212	0.150586	-0.357192	0.00346725	0.0608086	-21.8699	0.162055	-0.513047	1e-06	0.025308	-9	0.132843	-0.321999	1e-06	0.0825454	-33.9799	0.138124	-0.327825	1e-06	0.0839595	-34.5777
0.90944	2.22938	2.72953	0.150586	-0.357526	0.0035271	0.0603959	-21.8139	0.161458	-0.516313	1e-06	0.0252165	-9	0.132469	-0.322068	1e-06	0.0825667	-33.9861	0.137742	-0.327855	1e-06	0.0839459	-34.5738
0.9106	2.23245	2.72693	0.145752	-0.358315	0.00362008	0.0600133	-21.7543	0.160857	-0.519491	1e-06	0.0251244	-9	0.132095	-0.322141	1e-06	0.0825847	-33.9927	0.137359	-0.327882	1e-06	0.0839295	-34.5688
0.91176	2.23554	2.72431	0.149414	-0.354268	0.00367967	0.0595962	-21.7001	0.160252	-0.52258	1e-06	0.0250316	-9	0.131722	-0.322214	1e-06	0.0825993	-33.9993	0.136976	-0.327904	1e-06	0.0839102	-34.5628
0.91292	2.23864	2.72168	0.148975	-0.354678	0.0037137	0.0591556	-21.6231	0.159645	-0.525581	1e-06	0.0249382	-9	0.131348	-0.322285	1e-06	0.0826107	-34.0056	0.136594	-0.327921	1e-06	0.0838881	-34.5558
0.91408	2.24175	2.71904	0.148828	-0.355058	0.00374777	0.0587141	-21.5469	0.159033	-0.528491	1e-06	0.0248443	-9	0.130974	-0.32235	1e-06	0.0826188	-34.0115	0.136211	-0.327933	1e-06	0.0838631	-34.5477
0.91524	2.24487	2.71639	0.147949	-0.355728	0.00379356	0.0582836	-21.4709	0.158418	-0.531312	1e-06	0.0247498	-9	0.1306	-0.322409	1e-06	0.0826237	-34.0168	0.135828	-0.32794	1e-06	0.0838353	-34.5387
0.9164	2.24801	2.71373	0.147803	-0.355888	0.00386118	0.0578759	-21.3967	0.157801	-0.534043	1e-06	0.0246548	-9	0.130226	-0.322459	1e-06	0.0826253	-34.0214	0.135446	-0.327941	1e-06	0.0838047	-34.5286
0.91756	2.25117	2.71106	0.146924	-0.356339	0.00395926	0.0574976	-21.3199	0.15718	-0.536682	1e-06	0.0245595	-9	0.129852	-0.3225	1e-06	0.0826237	-34.025	0.135063	-0.327936	1e-06	0.0837713	-34.5175
0.91872	2.25433	2.70837	0.146631	-0.356281	0.00402515	0.0570861	-21.2473	0.156555	-0.53923	1e-06	0.0244637	-9	0.129478	-0.322531	1e-06	0.0826189	-34.0278	0.13468	-0.327925	1e-06	0.0837352	-34.5053
0.91988	2.25751	2.70567	0.146484	-0.356354	0.00406515	0.056651	-21.1771	0.155929	-0.541686	1e-06	0.0243675	-9	0.129104	-0.322281	1e-06	0.0820071	-34.0053	0.134298	-0.327908	1e-06	0.0836962	-34.4921
0.92104	2.2607	2.70297	0.145605	-0.35672	0.00410331	0.0562126	-21.1066	0.155299	-0.544051	1e-06	0.024271	-9	0.12873	-0.321552	1e-06	0.0813989	-33.9397	0.133915	-0.327883	1e-06	0.0836546	-34.4779
0.9222	2.26391	2.70025	0.145166	-0.356577	0.00415131	0.0557852	-21.038	0.154666	-0.546322	1e-06	0.0241742	-9	0.128358	-0.320437	1e-06	0.0807946	-33.8393	0.133533	-0.327852	1e-06	0.0836101	-34.4627
0.92336	2.26712	2.69752	0.14502	-0.356405	0.00422005	0.055379	-20.9672	0.154031	-0.548502	1e-06	0.0240771	-9	0.127987	-0.319013	1e-06	0.0801943	-33.7111	0.13315	-0.327778	1e-06	0.0831355	-34.3049
0.92452	2.27035	2.69478	0.144434	-0.356525	0.00431738	0.0550005	-20.893	0.153394	-0.550588	1e-06	0.0239798	-9	0.127618	-0.317341	1e-06	0.0795983	-33.5607	0.132768	-0.327603	1e-06	0.0825412	-34.1058
0.92568	2.27359	2.69203	0.143994	-0.356457	0.00439383	0.0545934	-20.8184	0.152754	-0.552581	1e-06	0.0238823	-9	0.127251	-0.315471	1e-06	0.0790067	-33.3924	0.132386	-0.327323	1e-06	0.0819503	-33.906
0.92684	2.27685	2.68927	0.143701	-0.356361	0.00443864	0.0541526	-20.7457	0.152112	-0.554481	1e-06	0.0237846	-9	0.126886	-0.313446	1e-06	0.0784194	-33.2101	0.132005	-0.326945	1e-06	0.0813628	-33.7055
0.928	2.28011	2.6865	0.143115	-0.356396	0.0044759	0.0537054	-20.6742	0.151468	-0.556287	1e-06	0.0236867	-9	0.126524	-0.311298	1e-06	0.0778366	-33.0168	0.131624	-0.326472	1e-06	0.0807788	-33.5045
0.92916	2.28339	2.68372	0.142822	-0.356242	0.00452115	0.0532651	-20.6029	0.150821	-0.558	1e-06	0.0235888	-9	0.126164	-0.309053	1e-06	0.0772583	-32.8148	0.131243	-0.32591	1e-06	0.0801983	-33.303
0.93032	2.28668	2.68093	0.14209	-0.35622	0.00458528	0.0528444	-20.5305	0.150173	-0.559619	1e-06	0.0234907	-9	0.125807	-0.306735	1e-06	0.0766845	-32.6061	0.130864	-0.325263	1e-06	0.0796213	-33.1011
0.93148	2.28998	2.67813	0.141943	-0.355849	0.00467769	0.0524505	-20.4564	0.149523	-0.561144	1e-06	0.0233926	-9	0.125452	-0.30436	1e-06	0.0761151	-32.3924	0.130485	-0.324535	1e-06	0.0790479	-32.899
0.93264	2.29329	2.67533	0.141504	-0.355769	0.00476595	0.052055	-20.383	0.148871	-0.562576	1e-06	0.0232945	-9	0.125101	-0.301944	1e-06	0.0755501	-32.175	0.130107	-0.323729	1e-06	0.0784781	-32.6966
0.9338	2.29661	2.67251	0.140918	-0.35566	0.00482149	0.0516256	-20.3127	0.148218	-0.563914	1e-06	0.0231963	-9	0.124752	-0.299498	1e-06	0.0749896	-31.9548	0.12973	-0.322851	1e-06	0.0779119	-32.4941
0.93496	2.29995	2.66968	0.140332	-0.355361	0.00486222	0.0511796	-20.244	0.147563	-0.565157	1e-06	0.0230982	-9	0.124406	-0.297031	1e-06	0.0744334	-31.7328	0.129354	-0.321902	1e-06	0.0773493	-32.2916
0.93612	2.30329	2.66685	0.139746	-0.354872	0.00490833	0.0507374	-20.1744	0.146907	-0.566308	1e-06	0.0230001	-9	0.124063	-0.294551	1e-06	0.0738814	-31.5095	0.128979	-0.320888	1e-06	0.0767903	-32.0891
0.93728	2.30664	2.664	0.139453	-0.354192	0.00496839	0.05031	-20.1033	0.146249	-0.567364	1e-06	0.0229021	-9	0.123723	-0.292064	1e-06	0.0733337	-31.2857	0.128606	-0.319811	1e-06	0.076235	-31.8866
0.93844	2.31001	2.66115	0.13916	-0.353642	0.00505257	0.0499078	-20.0289	0.145591	-0.568327	1e-06	0.0228041	-9	0.123385	-0.289575	1e-06	0.0727902	-31.0617	0.128233	-0.318674	1e-06	0.0756833	-31.6843
0.9396	2.31338	2.65829	0.138428	-0.353219	0.00513849	0.0495053	-19.9527	0.144931	-0.569196	1e-06	0.0227063	-9	0.123051	-0.287088	1e-06	0.0722507	-30.8379	0.127863	-0.317481	1e-06	0.0751353	-31.4821
0.94076	2.31676	2.65542	0.138574	-0.352444	0.00519062	0.0490696	-19.8794	0.14427	-0.569972	1e-06	0.0226085	-9	0.122719	-0.284606	1e-06	0.0717154	-30.6145	0.127493	-0.316235	1e-06	0.0745909	-31.2802
0.94192	2.32016	2.65254	0.137988	-0.352276	0.00522376	0.0486157	-19.8061	0.143609	-0.570654	1e-06	0.022511	-9	0.12239	-0.282132	1e-06	0.071184	-30.3918	0.127125	-0.314938	1e-06	0.0740501	-31.0786
0.94308	2.32356	2.64965	0.137549	-0.351914	0.00526119	0.048163	-19.7332	0.142946	-0.571243	1e-06	0.0224136	-9	0.122065	-0.279667	1e-06	0.0706565	-30.17	0.126759	-0.313594	1e-06	0.0735129	-30.8773
0.94424	2.32697	2.64676	0.136963	-0.351518	0.00531224	0.0477234	-19.66	0.142283	-0.571739	1e-06	0.0223164	-9	0.121742	-0.277214	1e-06	0.070133	-29.9492	0.126394	-0.312204	1e-06	0.0729793	-30.6764
0.9454	2.3304	2.64385	0.136523	-0.350927	0.00538397	0.0473064	-19.5868	0.14162	-0.572143	1e-06	0.0222194	-9	0.121421	-0.274773	1e-06	0.0696132	-29.7295	0.126031	-0.310772	1e-06	0.0724493	-30.4759
0.94656	2.33383	2.64094	0.136084	-0.350301	0.00545864	0.0468914	-19.513	0.140956	-0.572453	1e-06	0.0221226	-9	0.121104	-0.272345	1e-06	0.0690971	-29.511	0.12567	-0.309299	1e-06	0.0719229	-30.2758
0.94772	2.33727	2.63803	0.135937	-0.349638	0.00550923	0.0464484	-19.4393	0.140292	-0.572672	1e-06	0.022026	-9	0.12079	-0.269931	1e-06	0.0685847	-29.2938	0.12531	-0.307789	1e-06	0.0714001	-30.0763
0.94888	2.34072	2.6351	0.135059	-0.349259	0.00554122	0.045986	-19.3665	0.139627	-0.572798	1e-06	0.0219297	-9	0.120478	-0.267532	1e-06	0.068076	-29.0778	0.124953	-0.306242	1e-06	0.0708808	-29.8772
0.95004	2.34417	2.63217	0.134912	-0.348361	0.00557636	0.0455247	-19.2944	0.138963	-0.572832	1e-06	0.0218337	-9	0.120169	-0.265147	1e-06	0.0675708	-28.8632	0.124597	-0.304663	1e-06	0.070365	-29.6787
0.9512	2.34764	2.62923	0.134326	-0.347746	0.00562475	0.0450747	-19.2192	0.138298	-0.572775	1e-06	0.021738	-9	0.119863	-0.262778	1e-06	0.0670691	-28.65	0.124243	-0.303052	1e-06	0.0698526	-29.4808
0.95236	2.35111	2.62628	0.133594	-0.34693	0.00569344	0.0446455	-19.1432	0.137634	-0.572626	1e-06	0.0216425	-9	0.119559	-0.260423	1e-06	0.0665708	-28.4381	0.12389	-0.301411	1e-06	0.0693438	-29.2835
0.95352	2.35459	2.62333	0.133154	-0.345754	0.00577166	0.0442203	-19.0637	0.13697	-0.572386	1e-06	0.0215474	-9	0.119259	-0.258085	1e-06	0.0660759	-28.2276	0.12354	-0.299742	1e-06	0.0688384	-29.0869
0.95468	2.35808	2.62037	0.133447	-0.344535	0.00584789	0.0437947	-18.9827	0.136306	-0.572056	1e-06	0.0214526	-9	0.118961	-0.255761	1e-06	0.0655844	-28.0185	0.123192	-0.298048	1e-06	0.0683364	-28.8909
0.95584	2.36158	2.61741	0.132715	-0.344075	0.00590595	0.0433503	-18.9003	0.135643	-0.571635	1e-06	0.0213581	-9	0.118665	-0.253453	1e-06	0.0650961	-27.8108	0.122846	-0.296329	1e-06	0.0678378	-28.6956
0.957	2.36508	2.61444	0.132129	-0.343249	0.00595135	0.0428942	-18.8216	0.13498	-0.571123	1e-06	0.021264	-9	0.118373	-0.25116	1e-06	0.064611	-27.6044	0.122501	-0.294587	1e-06	0.0673425	-28.5009
0.95816	2.36859	2.61146	0.131689	-0.342219	0.00600738	0.0424469	-18.7414	0.134318	-0.570522	1e-06	0.0211703	-9	0.118082	-0.248882	1e-06	0.0641291	-27.3994	0.122159	-0.292825	1e-06	0.0668506	-28.307
0.95932	2.37211	2.60847	0.131543	-0.341141	0.00608265	0.0420202	-18.6595	0.133656	-0.569832	1e-06	0.0210769	-9	0.117795	-0.246619	1e-06	0.0636504	-27.1957	0.121819	-0.291042	1e-06	0.066362	-28.1138
0.96048	2.37563	2.60548	0.130957	-0.340337	0.00618343	0.0416027	-18.5678	0.132996	-0.569052	1e-06	0.0209839	-9	0.11751	-0.244371	1e-06	0.0631746	-26.9934	0.121481	-0.289242	1e-06	0.0658766	-27.9214
0.96164	2.37917	2.60249	0.129639	-0.339323	0.00628043	0.0411845	-18.4785	0.132336	-0.568184	1e-06	0.0208913	-9	0.117228	-0.242137	1e-06	0.0627019	-26.7923	0.121145	-0.287425	1e-06	0.0653945	-27.7298
0.9628	2.3827	2.59949	0.131982	-0.337298	0.00635981	0.0407488	-18.3904	0.131678	-0.567228	1e-06	0.0207991	-9	0.116949	-0.239918	1e-06	0.0622322	-26.5926	0.120812	-0.285592	1e-06	0.0649156	-27.5389
0.96396	2.38625	2.59648	0.129053	-0.338265	0.00642864	0.0402975	-18.2948	0.13102	-0.566183	1e-06	0.0207073	-9	0.116672	-0.237713	1e-06	0.0617653	-26.3942	0.12048	-0.283745	1e-06	0.0644398	-27.3488
0.96512	2.3898	2.59347	0.129199	-0.336456	0.00650562	0.0398509	-18.2091	0.130364	-0.565051	1e-06	0.0206159	-9	0.116397	-0.235522	1e-06	0.0613014	-26.197	0.120151	-0.281885	1e-06	0.0639672	-27.1595
0.96628	2.39335	2.59046	0.12876	-0.335234	0.00659859	0.0394199	-18.1175	0.129709	-0.563832	1e-06	0.0205249	-9	0.116125	-0.233345	1e-06	0.0608402	-26.0011	0.119823	-0.280012	1e-06	0.0634977	-26.971
0.96744	2.39691	2.58744	0.128467	-0.333956	0.00671541	0.0390174	-18.025	0.129056	-0.562526	1e-06	0.0204344	-9	0.115856	-0.231182	1e-06	0.0603818	-25.8064	0.119498	-0.278129	1e-06	0.0630312	-26.7833
0.9686	2.40048	2.58441	0.12876	-0.332782	0.00682679	0.0386147	-17.9341	0.128404	-0.561134	1e-06	0.0203443	-9	0.115589	-0.229032	1e-06	0.0599262	-25.6129	0.119176	-0.276236	1e-06	0.0625678	-26.5965
0.96976	2.40405	2.58138	0.127734	-0.332352	0.0069197	0.0381921	-17.8438	0.127754	-0.559656	1e-06	0.0202547	-9	0.115324	-0.226895	1e-06	0.0594732	-25.4206	0.118855	-0.274334	1e-06	0.0621074	-26.4104
0.97092	2.40763	2.57835	0.127441	-0.33122	0.0069989	0.0377545	-17.7585	0.127106	-0.558092	1e-06	0.0201655	-9	0.115062	-0.224772	1e-06	0.0590229	-25.2295	0.118537	-0.272423	1e-06	0.06165	-26.2252
0.97208	2.41121	2.57531	0.126562	-0.330189	0.00708388	0.0373168	-17.6706	0.12646	-0.556398	1e-06	0.0199804	-9	0.114803	-0.222661	1e-06	0.0585752	-25.0395	0.118221	-0.270506	1e-06	0.0611955	-26.0409
0.97324	2.4148	2.57227	0.127148	-0.328615	0.00718169	0.0368907	-17.5823	0.125815	-0.554527	1e-06	0.0197973	-9	0.114546	-0.220563	1e-06	0.0581301	-24.8507	0.117907	-0.268582	1e-06	0.0607439	-25.8574
0.9744	2.41839	2.56922	0.125977	-0.3281	0.00729946	0.0364875	-17.4917	0.125173	-0.552482	1e-06	0.0196162	-9	0.114291	-0.218478	1e-06	0.0576874	-24.663	0.117595	-0.266653	1e-06	0.0602951	-25.6747
0.97556	2.42199	2.56617	0.125537	-0.326718	0.00741097	0.0360849	-17.409	0.124534	-0.550265	1e-06	0.019437	-9	0.114039	-0.216405	1e-06	0.0572473	-24.4764	0.117286	-0.264719	1e-06	0.0598492	-25.4929
0.97672	2.42559	2.56312	0.125098	-0.325271	0.00752025	0.0356824	-17.3269	0.123897	-0.547878	1e-06	0.0192598	-9	0.113789	-0.214343	1e-06	0.0568096	-24.2909	0.116979	-0.262781	1e-06	0.0594061	-25.3119
0.97788	2.42919	2.56006	0.124658	-0.323755	0.00761349	0.0352625	-17.2448	0.123263	-0.545322	1e-06	0.0190845	-9	0.113542	-0.212294	1e-06	0.0563743	-24.1065	0.116674	-0.260839	1e-06	0.0589657	-25.1318
0.97904	2.4328	2.557	0.124365	-0.322169	0.00770708	0.0348392	-17.1603	0.122632	-0.5426	1e-06	0.0189112	-9	0.113297	-0.210257	1e-06	0.0559413	-23.9231	0.116372	-0.258895	1e-06	0.0585281	-24.9525
0.9802	2.43641	2.55394	0.123779	-0.320672	0.00781509	0.0344261	-17.0717	0.122004	-0.539713	1e-06	0.0187398	-9	0.113054	-0.208231	1e-06	0.0555107	-23.7408	0.116071	-0.256949	1e-06	0.0580932	-24.7741
0.98136	2.44002	2.55087	0.121875	-0.318941	0.00794074	0.034035	-16.983	0.12138	-0.536663	1e-06	0.0185704	-9	0.112813	-0.206216	1e-06	0.0550824	-23.5594	0.115773	-0.255001	1e-06	0.0576609	-24.5965
0.98252	2.44364	2.5478	0.123047	-0.31553	0.00805785	0.033643	-16.8964	0.120759	-0.533451	1e-06	0.0184028	-9	0.112575	-0.204212	1e-06	0.0546564	-23.3791	0.115478	-0.253052	1e-06	0.0572313	-24.4198
0.98368	2.44726	2.54473	0.122607	-0.313803	0.00817278	0.0332526	-16.7999	0.120142	-0.530081	1e-06	0.0182372	-9	0.11234	-0.20222	1e-06	0.0542325	-23.1998	0.115184	-0.251103	1e-06	0.0568042	-24.2439
0.98484	2.45088	2.54166	0.122314	-0.311993	0.00827095	0.0328447	-16.703	0.119529	-0.526554	1e-06	0.0180735	-9	0.112106	-0.200238	1e-06	0.0538109	-23.0215	0.114893	-0.249154	1e-06	0.0563797	-24.0688
0.986	2.45451	2.53858	0.121875	-0.310258	0.00836023	0.032422	-16.6027	0.11892	-0.52287	1e-06	0.0179118	-9	0.111875	-0.198267	1e-06	0.0533914	-22.8441	0.114604	-0.247205	1e-06	0.0559577	-23.8947
0.98716	2.45814	2.53551	0.121436	-0.308437	0.00846088	0.0320063	-16.4986	0.118316	-0.519033	1e-06	0.0177518	-9	0.111646	-0.196307	1e-06	0.0529741	-22.6676	0.114318	-0.245258	1e-06	0.0555383	-23.7213
0.98832	2.46177	2.53243	0.121143	-0.306526	0.00857922	0.0316096	-16.3921	0.117716	-0.515045	1e-06	0.0175938	-9	0.11142	-0.194357	1e-06	0.0525588	-22.4921	0.114034	-0.243311	1e-06	0.0551212	-23.5488
0.98948	2.4654	2.52935	0.120703	-0.304683	0.00868597	0.0312104	-16.2884	0.117121	-0.510906	1e-06	0.0174376	-9	0.111195	-0.192417	1e-06	0.0521456	-22.3175	0.113752	-0.241367	1e-06	0.0547067	-23.3771
0.99064	2.46904	2.52626	0.120703	-0.302747	0.00878745	0.0308144	-16.1872	0.116531	-0.506618	1e-06	0.0172833	-9	0.110973	-0.190487	1e-06	0.0517344	-22.1438	0.113472	-0.239425	1e-06	0.0542945	-23.2063
0.9918	2.47267	2.52318	0.119678	-0.301195	0.00888689	0.0304063	-16.0804	0.115946	-0.502184	1e-06	0.0171308	-9	0.110753	-0.188567	1e-06	0.0513252	-21.971	0.113194	-0.237485	1e-06	0.0538846	-23.0362
0.99296	2.47631	2.52009	0.119531	-0.298902	0.00897513	0.0299827	-15.9733	0.115366	-0.497605	1e-06	0.0169802	-9	0.110536	-0.186656	1e-06	0.050918	-21.7991	0.112919	-0.235548	1e-06	0.0534771	-22.867
0.99412	2.47995	2.51701	0.119238	-0.29683	0.00907164	0.0295606	-15.8593	0.114792	-0.492883	1e-06	0.0168313	-9	0.11032	-0.184756	1e-06	0.0505127	-21.628	0.112646	-0.233615	1e-06	0.053072	-22.6986
0.99528	2.48359	2.51392	0.119092	-0.294813	0.00918275	0.0291537	-15.7421	0.114223	-0.488019	1e-06	0.0166843	-9	0.110107	-0.182864	1e-06	0.0501093	-21.4578	0.112376	-0.231685	1e-06	0.052669	-22.5311
0.99644	2.48723	2.51083	0.119092	-0.29301	0.00928536	0.0287442	-15.6264	0.113659	-0.483016	1e-06	0.016539	-9	0.109896	-0.180982	1e-06	0.0497078	-21.2884	0.112107	-0.229758	1e-06	0.0522683	-22.3643
0.9976	2.49087	2.50774	0.118213	-0.291579	0.00937958	0.0283371	-15.5155	0.113102	-0.477875	1e-06	0.0163955	-9	0.109687	-0.179109	1e-06	0.0493081	-21.1198	0.111841	-0.227836	1e-06	0.0518699	-22.1983
0.99876	2.49451	2.50465	0.118066	-0.289557	0.00948414	0.0279451	-15.4079	0.112551	-0.472597	1e-06	0.0162537	-9	0.109481	-0.177245	1e-06	0.0489103	-20.9521	0.111577	-0.225918	1e-06	0.0514736	-22.0331
0.99992	2.49816	2.50156	0.11748	-0.287741	0.00957671	0.0275366	-15.298	0.112006	-0.467185	1e-06	0.0161137	-9	0.109276	-0.17539	1e-06	0.0485143	-20.7851	0.111316	-0.224004	1e-06	0.0510794	-21.8688
1.00108	2.5018	2.49847	0.117041	-0.28565	0.00966437	0.027119	-15.1868	0.111467	-0.46164	1e-06	0.0159753	-9	0.109074	-0.173544	1e-06	0.04812	-20.6189	0.111056	-0.222096	1e-06	0.0506874	-21.7052
1.00224	2.50544	2.49539	0.116309	-0.283441	0.00976505	0.0267117	-15.072	0.110935	-0.455963	1e-06	0.0158387	-9	0.108873	-0.171706	1e-06	0.0477275	-20.4535	0.110799	-0.220192	1e-06	0.0502975	-21.5423
1.0034	2.50908	2.4923	0.116455	-0.280789	0.00987424	0.0263074	-14.9523	0.110409	-0.450157	1e-06	0.0157038	-9	0.108675	-0.169877	1e-06	0.0473366	-20.2889	0.110544	-0.218293	1e-06	0.0499096	-21.3803
1.00456	2.51272	2.48921	0.116309	-0.278655	0.00997502	0.0259062	-14.8333	0.10989	-0.444222	1e-06	0.0155705	-9	0.108479	-0.168056	1e-06	0.0469475	-20.125	0.110291	-0.216399	1e-06	0.0495237	-21.219
1.00572	2.51637	2.48612	0.115723	-0.276714	0.010083	0.0255185	-14.7151	0.109379	-0.438161	1e-06	0.0154389	-9	0.108285	-0.166243	1e-06	0.04656	-19.9619	0.110041	-0.214511	1e-06	0.0491399	-21.0585
1.00688	2.52001	2.48303	0.115283	-0.274483	0.0101775	0.0251145	-14.5966	0.108874	-0.431975	1e-06	0.0153089	-9	0.108094	-0.164438	1e-06	0.0461742	-19.7994	0.109792	-0.212629	1e-06	0.048758	-20.8987
1.00804	2.52364	2.47995	0.115283	-0.27212	0.010267	0.0246973	-14.4735	0.108377	-0.425665	1e-06	0.0151806	-9	0.107904	-0.162642	1e-06	0.04579	-19.6377	0.109546	-0.210752	1e-06	0.0483781	-20.7397
1.0092	2.52728	2.47686	0.114697	-0.270102	0.0103695	0.0242891	-14.3453	0.107886	-0.419233	1e-06	0.0150538	-9	0.107716	-0.160853	1e-06	0.0454074	-19.4767	0.109302	-0.208881	1e-06	0.0480002	-20.5814
1.01036	2.53092	2.47378	0.113525	-0.267785	0.0104883	0.0239039	-14.2184	0.107404	-0.412681	1e-06	0.0149286	-9	0.107531	-0.159072	1e-06	0.0450263	-19.3164	0.10906	-0.207016	1e-06	0.0476241	-20.4238
1.01152	2.53455	2.47069	0.114111	-0.264526	0.0105971	0.0235205	-14.0953	0.106929	-0.40601	1e-06	0.014805	-9	0.107347	-0.157298	1e-06	0.0446468	-19.1568	0.108821	-0.205157	1e-06	0.0472498	-20.267
1.01268	2.53819	2.46761	0.113818	-0.262245	0.0107101	0.0231506	-13.9683	0.106462	-0.399222	1e-06	0.0146829	-9	0.107166	-0.155532	1e-06	0.0442688	-18.9979	0.108583	-0.203305	1e-06	0.0468775	-20.1109
1.01384	2.54182	2.46453	0.113525	-0.259975	0.0108211	0.0227698	-13.8363	0.106003	-0.392317	1e-06	0.0145624	-9	0.106986	-0.153773	1e-06	0.0438923	-18.8396	0.108348	-0.201458	1e-06	0.0465069	-19.9555
1.015	2.54544	2.46146	0.113232	-0.257715	0.010925	0.0223753	-13.701	0.105552	-0.385299	1e-06	0.0144434	-9	0.106809	-0.152022	1e-06	0.0435173	-18.682	0.108115	-0.199618	1e-06	0.0461381	-19.8008
1.01616	2.54907	2.45838	0.112793	-0.255461	0.0110411	0.0219882	-13.5616	0.105109	-0.378167	1e-06	0.0143259	-9	0.106634	-0.150278	1e-06	0.0431437	-18.525	0.107884	-0.197785	1e-06	0.0457711	-19.6468
1.01732	2.55269	2.45531	0.112646	-0.253051	0.0111736	0.0216222	-13.4218	0.104675	-0.370923	1e-06	0.0142098	-9	0.10646	-0.148541	1e-06	0.0427715	-18.3687	0.107655	-0.195958	1e-06	0.0454059	-19.4935
1.01848	2.55631	2.45224	0.112354	-0.250802	0.0112938	0.0212556	-13.286	0.104249	-0.36357	1e-06	0.0140952	-9	0.106289	-0.14681	1e-06	0.0424008	-18.2129	0.107428	-0.194137	1e-06	0.0450423	-19.3409
1.01964	2.55993	2.44917	0.111914	-0.24855	0.0114114	0.0208998	-13.1552	0.103831	-0.356107	1e-06	0.0139821	-9	0.10612	-0.145087	1e-06	0.0420315	-18.0578	0.107204	-0.192323	1e-06	0.0446805	-19.1889
1.0208	2.56355	2.4461	0.111621	-0.246134	0.0115434	0.0205597	-13.0231	0.103422	-0.348537	1e-06	0.0138704	-9	0.105953	-0.14337	1e-06	0.0416635	-17.9033	0.106981	-0.190516	1e-06	0.0443203	-19.0377
1.02196	2.56716	2.44304	0.111182	-0.243708	0.0116645	0.0202038	-12.8883	0.103023	-0.340861	1e-06	0.0137601	-9	0.105787	-0.14166	1e-06	0.0412968	-17.7494	0.106761	-0.188715	1e-06	0.0439618	-18.887
1.02312	2.57077	2.43998	0.110889	-0.241112	0.011781	0.0198441	-12.7526	0.102632	-0.33308	1e-06	0.0136512	-9	0.105624	-0.139957	1e-06	0.0409315	-17.5961	0.106542	-0.186921	1e-06	0.0436048	-18.7371
1.02428	2.57437	2.43692	0.111035	-0.238501	0.0119132	0.0195019	-12.6139	0.10225	-0.325196	1e-06	0.0135437	-9	0.105462	-0.13826	1e-06	0.0405675	-17.4434	0.106326	-0.185134	1e-06	0.0432495	-18.5878
1.02544	2.57797	2.43387	0.110449	-0.236353	0.0120319	0.0191565	-12.4781	0.101877	-0.31721	1e-06	0.0134376	-9	0.105303	-0.136569	1e-06	0.0402048	-17.2912	0.106112	-0.183353	1e-06	0.0428958	-18.4391
1.0266	2.58157	2.43082	0.110449	-0.233864	0.012141	0.018813	-12.3482	0.101514	-0.309122	1e-06	0.0133328	-9	0.105146	-0.134885	1e-06	0.0398433	-17.1397	0.1059	-0.18158	1e-06	0.0425436	-18.2911
1.02776	2.58516	2.42777	0.11001	-0.231671	0.0122624	0.0184849	-12.2169	0.10116	-0.300936	1e-06	0.0132293	-9	0.10499	-0.133207	1e-06	0.0394831	-16.9886	0.10569	-0.179813	1e-06	0.0421929	-18.1437
1.02892	2.58874	2.42473	0.109717	-0.229292	0.0123738	0.0181422	-12.0849	0.100816	-0.292651	1e-06	0.0131272	-9	0.104837	-0.131535	1e-06	0.0391242	-16.8381	0.105482	-0.178053	1e-06	0.0418438	-17.9969
1.03008	2.59233	2.42169	0.109424	-0.226883	0.0124784	0.0177877	-11.9506	0.100481	-0.284269	1e-06	0.0130264	-9	0.104685	-0.129869	1e-06	0.0387664	-16.6882	0.105276	-0.176299	1e-06	0.0414961	-17.8507
1.03124	2.5959	2.41866	0.108984	-0.224442	0.0125958	0.0174457	-11.8143	0.100156	-0.275791	1e-06	0.0129268	-9	0.104535	-0.128208	1e-06	0.0384098	-16.5387	0.105073	-0.174553	1e-06	0.04115	-17.7052
1.0324	2.59948	2.41563	0.108838	-0.221805	0.0127004	0.0170988	-11.6812	0.0998415	-0.267219	1e-06	0.0128285	-9	0.104388	-0.126554	1e-06	0.0380544	-16.3898	0.104871	-0.172813	1e-06	0.0408052	-17.5602
1.03356	2.60304	2.4126	0.108691	-0.219289	0.0127956	0.0167534	-11.5513	0.0995365	-0.258553	1e-06	0.0127315	-9	0.104242	-0.124905	1e-06	0.0377002	-16.2414	0.104671	-0.17108	1e-06	0.0404619	-17.4158
1.03472	2.6066	2.40958	0.106934	-0.216891	0.0128984	0.0164215	-11.422	0.0992416	-0.249796	1e-06	0.0126357	-9	0.104098	-0.123262	1e-06	0.037347	-16.0936	0.104473	-0.169354	1e-06	0.04012	-17.272
1.03588	2.61016	2.40657	0.108252	-0.212844	0.0130208	0.0161082	-11.2902	0.098957	-0.240947	1e-06	0.0125411	-9	0.103956	-0.121624	1e-06	0.0369951	-15.9462	0.104278	-0.167635	1e-06	0.0397794	-17.1288
1.03704	2.61371	2.40355	0.107959	-0.210511	0.0131356	0.0157827	-11.1468	0.0986827	-0.232008	1e-06	0.0124478	-9	0.103816	-0.119992	1e-06	0.0366442	-15.7993	0.104084	-0.165922	1e-06	0.0394403	-16.9862
1.0382	2.61725	2.40055	0.107666	-0.208124	0.0132608	0.0154657	-11.0018	0.0984188	-0.222981	1e-06	0.0123556	-9	0.103677	-0.118365	1e-06	0.0362944	-15.6529	0.103892	-0.164216	1e-06	0.0391025	-16.8441
1.03936	2.62079	2.39755	0.107373	-0.205681	0.0133719	0.0151396	-10.8598	0.0981654	-0.213866	1e-06	0.0122646	-9	0.103541	-0.116744	1e-06	0.0359456	-15.5069	0.103702	-0.162517	1e-06	0.038766	-16.7026
1.04052	2.62432	2.39455	0.10708	-0.203178	0.0134713	0.0148134	-10.723	0.0979226	-0.204665	1e-06	0.0121748	-9	0.103406	-0.115127	1e-06	0.0355979	-15.3614	0.103515	-0.160824	1e-06	0.0384308	-16.5616
1.04168	2.62785	2.39156	0.106787	-0.200613	0.0135777	0.0145013	-10.5877	0.0976906	-0.195379	1e-06	0.0120861	-9	0.103274	-0.113516	1e-06	0.0352513	-15.2164	0.103329	-0.159138	1e-06	0.0380969	-16.4212
1.04284	2.63136	2.38858	0.106787	-0.197982	0.0136998	0.0142061	-10.4506	0.0974694	-0.186008	1e-06	0.0119986	-9	0.103143	-0.11191	1e-06	0.0349057	-15.0719	0.103145	-0.157459	1e-06	0.0377642	-16.2813
1.044	2.63488	2.3856	0.106641	-0.195602	0.0138121	0.013898	-10.3114	0.0972591	-0.176554	1e-06	0.0119121	-9	0.103014	-0.110309	1e-06	0.034561	-14.9278	0.102963	-0.155786	1e-06	0.0374328	-16.142
1.04516	2.63838	2.38263	0.105176	-0.19331	0.0139202	0.0135842	-10.1721	0.0970598	-0.167018	1.92887e-05	0.0118268	-9	0.102887	-0.108712	1e-06	0.0342174	-14.7841	0.102783	-0.15412	1e-06	0.0371027	-16.0031
1.04632	2.64188	2.37966	0.105762	-0.18966	0.014022	0.0132629	-10.0335	0.0968717	-0.157357	6.1381e-05	0.0117426	-9	0.102762	-0.107121	1e-06	0.0338747	-14.6409	0.102605	-0.15246	1e-06	0.0367738	-15.8648
1.04748	2.64536	2.37671	0.105615	-0.186893	0.0141105	0.0129406	-9.89353	0.0966948	-0.147567	0.00010469	0.0116595	-9	0.102639	-0.105534	1e-06	0.033533	-14.4981	0.102429	-0.150806	1e-06	0.036446	-15.727
1.04864	2.64885	2.37375	0.104883	-0.184202	0.0142116	0.0126332	-9.7515	0.0965294	-0.137648	0.0001492	0.0115775	-9	0.102517	-0.103952	1e-06	0.0331922	-14.3557	0.102255	-0.149159	1e-06	0.0361195	-15.5897
1.0498	2.65232	2.37081	0.105176	-0.180944	0.0143322	0.0123449	-9.60617	0.0963755	-0.1276	0.000194898	0.0114965	-9	0.102398	-0.102374	1e-06	0.0328524	-14.2137	0.102083	-0.147519	1e-06	0.0357941	-15.4529
1.05096	2.65578	2.36787	0.104736	-0.178236	0.0144438	0.0120459	-9.45589	0.0962334	-0.117422	0.000241764	0.0114166	-9	0.10228	-0.100801	1e-06	0.0325135	-14.0721	0.101913	-0.145884	1e-06	0.0354698	-15.3166
1.05212	2.65924	2.36494	0.104736	-0.175273	0.0145668	0.0117623	-9.30474	0.0961031	-0.107115	0.000289781	0.0113377	-9	0.102164	-0.0992327	1e-06	0.0321754	-13.9309	0.101744	-0.144256	1e-06	0.0351467	-15.1808
1.05328	2.66269	2.36201	0.104004	-0.172533	0.014675	0.0114726	-9.15531	0.0959849	-0.0966774	0.000338928	0.0112599	-9.00001	0.102049	-0.0976685	1e-06	0.0318382	-13.7902	0.101578	-0.142635	1e-06	0.0348247	-15.0454
1.05444	2.66613	2.35909	0.104297	-0.16921	0.0147808	0.0111929	-9.00936	0.0958789	-0.0861095	0.000389183	0.0111831	-9.00005	0.101937	-0.0961085	1e-06	0.031502	-13.6498	0.101413	-0.141019	1e-06	0.0345037	-14.9106
1.0556	2.66956	2.35618	0.10415	-0.166423	0.0149008	0.0109297	-8.8581	0.0957852	-0.0754107	0.000440522	0.0111074	-9.00023	0.101826	-0.0945529	1e-06	0.0311665	-13.5098	0.10125	-0.13941	1e-06	0.0341839	-14.7761
1.05676	2.67298	2.35328	0.104004	-0.163686	0.0150435	0.0106881	-8.70261	0.095704	-0.0645801	0.000492921	0.0110327	-9.00108	0.101718	-0.0930013	1e-06	0.0308319	-13.3701	0.10109	-0.137806	1e-06	0.0338651	-14.6422
1.05792	2.6764	2.35039	0.104004	-0.160998	0.0151774	0.0104376	-8.54613	0.0956354	-0.0536136	0.000546353	0.010959	-9.00519	0.101611	-0.0914539	1e-06	0.0304981	-13.2309	0.100931	-0.136209	1e-06	0.0335474	-14.5087
1.05908	2.6798	2.3475	0.103418	-0.158513	0.0153189	0.0101996	-8.38971	0.0955797	-0.0424928	0.00060079	0.0108863	-9.02541	0.101506	-0.0899105	1e-06	0.0301652	-13.092	0.100773	-0.134617	1e-06	0.0332307	-14.3757
1.06024	2.68319	2.34462	0.103271	-0.155589	0.0154457	0.00995513	-8.23774	0.0955369	-0.0311242	0.000656201	0.0108146	-9.12894	0.101402	-0.088371	1e-06	0.029833	-12.9534	0.100618	-0.133032	1e-06	0.032915	-14.243
1.0614	2.68658	2.34175	0.104297	-0.152701	0.0155658	0.00971637	-8.08869	0.0955077	-0.0189919	0.00071255	0.0107439	-9.72961	0.101301	-0.0868354	1e-06	0.0295016	-12.8152	0.100465	-0.131452	1e-06	0.0326003	-14.1109
1.06256	2.68995	2.33889	0.102979	-0.15113	0.0156987	0.00949225	-7.93692	0.0954944	-0.00159876	0.000769782	0.0106745	-17.7539	0.101201	-0.0853037	1e-06	0.029171	-12.6774	0.100313	-0.129878	1e-06	0.0322866	-13.9791
1.06372	2.69332	2.33603	0.102686	-0.148308	0.0158538	0.00929026	-7.78878	0.0954857	-0.000235332	0.000827986	0.0106053	-19.6363	0.101103	-0.0837757	1e-06	0.0288411	-12.5399	0.100163	-0.12831	1e-06	0.0319739	-13.8478
1.06488	2.69667	2.33319	0.102539	-0.145353	0.0159996	0.00907992	-7.6397	0.0954801	0.0027796	0.000887173	0.0105364	16.395	0.101006	-0.0822514	1e-06	0.028512	-12.4027	0.100016	-0.126748	1e-06	0.0316621	-13.7169
1.06604	2.70001	2.33035	0.10415	-0.142423	0.0161315	0.00886329	-7.49193	0.0954793	-0.0184047	0.000947316	0.0104679	-9.79346	0.100912	-0.0807307	1e-06	0.0281836	-12.2658	0.0998694	-0.125191	1e-06	0.0313513	-13.5864
1.0672	2.70335	2.32753	0.101953	-0.141437	0.0162716	0.00865945	-7.34276	0.0954672	0.000696547	0.00100862	0.0103985	18.9581	0.100819	-0.0792136	1e-06	0.0278559	-12.1293	0.0997251	-0.12364	1e-06	0.0310414	-13.4564
1.06836	2.70667	2.32471	0.101953	-0.138226	0.0164307	0.00847514	-7.20125	0.0954628	-0.0225087	0.00107084	0.0103297	-9.44148	0.100728	-0.0777	1e-06	0.0275289	-11.9931	0.0995826	-0.122094	1e-06	0.0307324	-13.3267
1.06952	2.70998	2.3219	0.101807	-0.13519	0.0166168	0.00829383	-7.04334	0.095445	-0.00685406	0.00113427	0.01026	-13.1319	0.100639	-0.0761898	1e-06	0.0272026	-11.8572	0.0994419	-0.120554	1e-06	0.0304243	-13.1974
1.07068	2.71328	2.3191	0.101807	-0.132165	0.0167969	0.0081091	-6.88366	0.0954245	-0.0108939	0.00119876	0.0101901	-11.3201	0.100551	-0.074683	1e-06	0.026877	-11.7216	0.099303	-0.11902	1e-06	0.0301171	-13.0685
1.07184	2.71657	2.31631	0.101514	-0.129309	0.0169557	0.00790987	-6.72523	0.0954276	-0.0110138	0.00126385	0.0101218	-11.2807	0.100465	-0.0731794	1e-06	0.026552	-11.5863	0.0991659	-0.11749	1e-06	0.0298108	-12.94
1.073	2.71985	2.31353	0.101367	-0.126296	0.0170996	0.00770442	-6.5693	0.0954306	-0.011156	0.00132993	0.0100535	-11.2349	0.100381	-0.0716791	1e-06	0.0262277	-11.4513	0.0990306	-0.115966	1e-06	0.0295053	-12.8118
1.07416	2.72311	2.31076	0.101514	-0.123283	0.0172481	0.00750952	-6.41227	0.0954333	-0.0113705	0.00139699	0.00998523	-11.1674	0.100299	-0.070182	1e-06	0.0259041	-11.3166	0.098897	-0.114448	1e-06	0.0292007	-12.6841
1.07532	2.72636	2.308	0.101221	-0.120586	0.0174124	0.00733267	-6.25181	0.0954356	-0.0118264	0.00146503	0.0099169	-11.0308	0.100219	-0.068688	1e-06	0.0255811	-11.1822	0.0987652	-0.112934	1e-06	0.0288969	-12.5567
1.07648	2.72961	2.30525	0.101074	-0.117723	0.0176002	0.00718063	-6.08869	0.0954369	-0.0131015	0.00153407	0.0098485	-10.6926	0.10014	-0.067197	1e-06	0.0252587	-11.0481	0.0986352	-0.111425	1e-06	0.0285939	-12.4297
1.07764	2.73284	2.30251	0.101074	-0.114848	0.0177801	0.00702376	-5.92515	0.0954353	-0.0173003	0.00160415	0.00977992	-9.92906	0.100063	-0.0657089	1e-06	0.0249369	-10.9143	0.0985069	-0.109922	1e-06	0.0282917	-12.303
1.0788	2.73605	2.29979	0.100488	-0.112119	0.0179362	0.00684868	-5.76348	0.095426	0.00691059	0.00167538	0.00971081	13.0987	0.0999874	-0.0642237	1e-06	0.0246156	-10.7807	0.0983804	-0.108424	1e-06	0.0279904	-12.1767
1.07996	2.73926	2.29707	0.100928	-0.108891	0.0180746	0.00666371	-5.60481	0.0954337	-0.00853003	0.00174717	0.00964284	-12.2522	0.0999137	-0.0627413	1e-06	0.024295	-10.6474	0.0982556	-0.10693	1e-06	0.0276898	-12.0507
1.08112	2.74245	2.29436	0.100928	-0.106283	0.0182143	0.00648487	-5.44353	0.0954098	-0.0133599	0.00182074	0.00957279	-10.6312	0.0998418	-0.0612616	1e-06	0.0239749	-10.5144	0.0981325	-0.105442	1e-06	0.0273899	-11.9251
1.08228	2.74563	2.29166	0.100635	-0.103809	0.0183709	0.00632278	-5.28001	0.0954082	-0.0169394	0.00189469	0.00950422	-9.97822	0.0997716	-0.0597845	1e-06	0.0236554	-10.3817	0.0980112	-0.103958	1e-06	0.0270909	-11.7998
1.08344	2.74879	2.28898	0.100488	-0.101146	0.0185532	0.00618654	-5.11452	0.0953999	0.0098333	0.00196979	0.00943521	11.6997	0.0997031	-0.05831	1e-06	0.0233365	-10.2492	0.0978916	-0.102479	1e-06	0.0267925	-11.6748
1.0846	2.75195	2.2863	0.100195	-0.098452	0.0187272	0.00604498	-4.94967	0.0954138	-0.00237631	0.00204521	0.00936763	-16.8336	0.0996363	-0.0568379	1e-06	0.023018	-10.117	0.0977738	-0.101005	1e-06	0.0264949	-11.5502
1.08576	2.75509	2.28364	0.100049	-0.095562	0.0188676	0.00587623	-4.78865	0.0954053	0.00118327	0.00212222	0.00929861	18.2892	0.0995713	-0.0553681	1e-06	0.0227001	-9.98503	0.0976576	-0.0995357	1e-06	0.0261981	-11.4259
1.08692	2.75821	2.28099	0.100049	-0.0926329	0.0189917	0.00569634	-4.62844	0.0954032	-0.018497	0.0022	0.00923001	-9.78308	0.0995079	-0.0539004	1e-06	0.0223828	-9.85335	0.0975432	-0.0980708	1e-06	0.0259019	-11.3019
1.08808	2.76133	2.27835	0.100195	-0.0898214	0.0191158	0.00552136	-4.46731	0.0953928	0.00574594	0.00227899	0.00916089	13.8406	0.0994462	-0.0524349	1e-06	0.0220659	-9.72194	0.0974304	-0.0966105	1e-06	0.0256064	-11.1782
1.08924	2.76442	2.27572	0.0997559	-0.0872843	0.0192541	0.00536114	-4.30307	0.0953992	-0.00922462	0.00235836	0.00909282	-11.945	0.0993862	-0.0509712	1e-06	0.0217495	-9.59081	0.0973194	-0.0951547	1e-06	0.0253116	-11.0548
1.0904	2.76751	2.27311	0.100049	-0.0843771	0.0194176	0.00522554	-4.13599	0.0953746	-0.0134015	0.00243974	0.00902283	-10.6216	0.0993279	-0.0495092	1e-06	0.0214335	-9.45995	0.0972101	-0.0937033	1e-06	0.0250175	-10.9317
1.09156	2.77058	2.2705	0.0984375	-0.0818975	0.0195902	0.00508961	-3.9614	0.095374	-0.0144763	0.00252121	0.00895433	-10.3908	0.0992714	-0.0480487	1e-06	0.0211181	-9.32938	0.0971024	-0.0922563	1e-06	0.0247241	-10.8089
1.09272	2.77363	2.26791	0.0996094	-0.0777586	0.0197443	0.00492759	-3.78481	0.0953714	-0.0178651	0.00260369	0.00888571	-9.85704	0.0992166	-0.0463386	0.000476367	0.0208031	-9.17653	0.0969964	-0.0908137	1e-06	0.0244313	-10.6864
1.09388	2.77668	2.26533	0.0996094	-0.0750009	0.0198809	0.00475091	-3.60041	0.0953626	0.00991322	0.00268733	0.00881672	11.669	0.099164	-0.0441857	0.000957621	0.0204887	-8.98416	0.0968922	-0.0893753	1e-06	0.0241391	-10.5642
1.09504	2.7797	2.26276	0.0990234	-0.0723383	0.0200132	0.00457483	-3.4162	0.0953779	-0.000431303	0.00277093	0.00874917	-19.3427	0.0991142	-0.041667	0.0014447	0.0201748	-8.75941	0.0967895	-0.0879411	1e-06	0.0238476	-10.4423
1.0962	2.78271	2.26021	0.0996094	-0.0691264	0.0201554	0.00440999	-3.23015	0.0953744	0.00674974	0.00285618	0.0086805	13.194	0.0990675	-0.0388447	0.00193752	0.0198615	-8.50816	0.0966886	-0.0865111	1e-06	0.0235567	-10.3207
1.09736	2.78571	2.25767	0.0996094	-0.0666434	0.0203208	0.00426701	-3.03672	0.0953835	-0.00604227	0.00294182	0.00861258	-13.64	0.0990242	-0.0357685	0.002436	0.0195489	-8.23534	0.0965893	-0.0850852	1e-06	0.0232664	-10.1993
1.09852	2.78869	2.25514	0.0991699	-0.064245	0.0205167	0.00415425	-2.84015	0.0953683	-0.00436191	0.00302939	0.00854322	-14.8989	0.0989846	-0.0324777	0.00294005	0.0192369	-7.94514	0.0964917	-0.0836633	1e-06	0.0229767	-10.0782
1.09968	2.79166	2.25262	0.0993164	-0.0614473	0.0207076	0.00403669	-2.64381	0.0953569	-0.000666891	0.00311771	0.0084741	-19.0004	0.0989489	-0.0290026	0.00344956	0.0189256	-7.64124	0.0963957	-0.0822454	1e-06	0.0226875	-9.9574
1.10084	2.79461	2.25012	0.0993164	-0.0588879	0.0208759	0.003901	-2.44836	0.0953533	0.00698973	0.00320658	0.00840544	13.0526	0.0989174	-0.0253657	0.00396443	0.018615	-7.32693	0.0963014	-0.0808315	1e-06	0.022399	-9.83683
1.102	2.79754	2.24763	0.0993164	-0.0564032	0.0210312	0.003754	-2.25332	0.0953634	-0.00480371	0.00329571	0.00833756	-14.5381	0.0988901	-0.0215823	0.00448454	0.018305	-7.00514	0.0962087	-0.0794215	1e-06	0.022111	-9.71652
1.10316	2.80046	2.24515	0.0996094	-0.0539901	0.0211954	0.00361564	-2.05652	0.0953515	-0.000978869	0.00338676	0.00826843	-18.5645	0.0988674	-0.0176616	0.00500978	0.0179957	-6.67807	0.0961177	-0.0780153	1e-06	0.0218236	-9.59646
1.10432	2.80337	2.24269	0.0991699	-0.0519662	0.0213787	0.00349581	-1.85737	0.0953476	0.00690692	0.00347831	0.00819975	13.1008	0.0988492	-0.0136097	0.00554002	0.017687	-6.34635	0.0960283	-0.0766128	1e-06	0.0215367	-9.47665
1.10548	2.80625	2.24024	0.0991699	-0.0495273	0.0215907	0.00340521	-1.65786	0.0953578	-0.00435303	0.00357001	0.00813187	-14.9064	0.0988358	-0.00943449	0.00607513	0.017379	-6.00756	0.0959406	-0.0751614	0.000471869	0.0212504	-9.17155
1.10664	2.80912	2.23781	0.0990234	-0.0471513	0.0217983	0.00330964	-1.45754	0.0953473	0.000527345	0.00366365	0.00806283	19.2018	0.0988274	-0.00515424	0.00661497	0.0170716	-5.6554	0.0958546	-0.0736102	0.000948173	0.0209646	-8.86271
1.1078	2.81198	2.23539	0.0990234	-0.0446749	0.0219724	0.00318573	-1.26141	0.0953457	-0.0163305	0.00375771	0.00799429	-10.0671	0.0988239	-0.000805271	0.0071594	0.0167648	-5.28117	0.0957704	-0.0719622	0.00142987	0.0206793	-8.5502
1.10896	2.81482	2.23298	0.0994629	-0.0422551	0.0221309	0.00304727	-1.0656	0.0953414	-0.0191746	0.00385276	0.0079256	-9.71083	0.0988255	0.00365598	0.00770829	0.0164586	-4.97111	0.0956883	-0.0702203	0.00191691	0.0203946	-8.23408
1.11012	2.81764	2.23059	0.102539	-0.0403699	0.0222958	0.00291578	-0.868513	0.0953323	0.0110903	0.00394895	0.00785666	11.256	0.0988325	0.00828518	0.00826148	0.016153	-4.62063	0.0956082	-0.0683872	0.00240924	0.0201105	-7.91444
1.11128	2.82044	2.22821	0.0978516	-0.0419024	0.0224828	0.0028027	-0.670298	0.0953525	0.00514624	0.00404429	0.00778929	14.2736	0.0988448	0.0129533	0.0088188	0.015848	-4.21031	0.0955303	-0.0664657	0.00290681	0.0198269	-7.59133
1.11244	2.82323	2.22584	0.0990234	-0.0383583	0.0226999	0.00271876	-0.491939	0.0953601	-0.00643627	0.00414119	0.00772123	-13.386	0.0988625	0.0175353	0.00938012	0.0155435	-3.74863	0.0954547	-0.0644582	0.00340955	0.0195439	-7.26484
1.1136	2.826	2.22349	0.0990234	-0.0361453	0.0229512	0.00264136	-0.291499	0.0953457	-0.00246032	0.00424023	0.00765203	-16.7401	0.0988854	0.0219269	0.00994532	0.0152394	-3.24515	0.0953814	-0.0623673	0.00391741	0.0192614	-6.93503
1.11476	2.82875	2.22116	0.0993164	-0.0339782	0.0231712	0.00253013	-0.0924473	0.0953399	0.00567587	0.00433961	0.00758327	13.8893	0.0989133	0.0260464	0.0105143	0.0149359	-2.70967	0.0953106	-0.0601953	0.00443031	0.0189795	-6.60196
1.11592	2.83149	2.21884	0.0990234	-0.0321749	0.023395	0.00242211	0.106977	0.0953489	-0.00481199	0.00443888	0.00751528	-14.5315	0.0989457	0.0298347	0.0110869	0.0146327	-2.15168	0.0952424	-0.0579445	0.00494818	0.0186982	-6.26572
1.11708	2.83421	2.21653	0.098877	-0.0300918	0.0236361	0.00233033	0.305873	0.0953385	0.0014552	0.00454021	0.0074463	17.9353	0.0989824	0.0332537	0.0116632	0.0143297	-1.57993	0.0951769	-0.0556171	0.00547095	0.0184174	-5.92636
1.11824	2.83691	2.21424	0.0978516	-0.0278866	0.0239071	0.00226553	0.50779	0.0953396	-0.0125443	0.00464162	0.00737791	-10.8328	0.0990227	0.0362846	0.012243	0.0140271	-1.00222	0.095114	-0.0532154	0.00599855	0.0181372	-5.58395
1.1194	2.83959	2.21197	0.100635	-0.0245947	0.0242124	0.00223228	0.713704	0.0953457	-0.00422399	0.00474349	0.00730976	-15.0163	0.0990664	0.0389252	0.0128263	0.0137246	-0.425166	0.095054	-0.0507414	0.00653088	0.0178575	-5.23858
1.12056	2.84226	2.20971	0.0997559	-0.0243797	0.0244856	0.00216544	0.924542	0.0953369	0.00324056	0.00484719	0.00724087	15.9238	0.0991129	0.0411876	0.0134132	0.0134222	0.145813	0.0949969	-0.048197	0.00706786	0.0175784	-4.89029
1.12172	2.8449	2.20746	0.098877	-0.0232339	0.024745	0.00208043	1.12441	0.0953418	-0.00839754	0.00495073	0.00717266	-12.3143	0.0991618	0.0430946	0.0140035	0.0131198	0.706548	0.0949428	-0.0455843	0.00760939	0.0172997	-4.53916
1.12288	2.84753	2.20523	0.0990234	-0.0211558	0.0250086	0.00199651	1.31992	0.0953242	-0.00478054	0.00505669	0.00710336	-14.5565	0.0992127	0.0446778	0.0145973	0.0128175	1.25404	0.0948918	-0.0429052	0.0081554	0.0170217	-4.18527
1.12404	2.85014	2.20302	0.098877	-0.0192648	0.0252846	0.0019252	1.51596	0.0953147	0.002797	0.00516288	0.00703445	16.3767	0.0992653	0.0459742	0.0151945	0.0125151	1.78638	0.0948439	-0.0401613	0.00870578	0.0167441	-3.82871
1.1252	2.85273	2.20082	0.098877	-0.0172379	0.0255896	0.00187881	1.71451	0.0953191	-0.00861925	0.00526883	0.00696622	-12.211	0.0993193	0.0470242	0.0157952	0.0122126	2.30257	0.0947991	-0.0373545	0.00926042	0.0164671	-3.46955
1.12636	2.8553	2.19864	0.0990234	-0.015233	0.0259293	0.00186501	1.91612	0.0953015	-0.00452941	0.00537724	0.00689695	-14.7594	0.0993743	0.0478696	0.0163993	0.0119101	2.80242	0.0947577	-0.0344863	0.00981923	0.0161905	-3.10789
1.12752	2.85786	2.19648	0.0972656	-0.0134077	0.0262392	0.00181562	2.11708	0.0952928	0.00393776	0.00548576	0.0068281	15.2674	0.0994303	0.048552	0.0170069	0.0116074	3.28636	0.0947196	-0.0315582	0.0103821	0.0159145	-2.74385
1.12868	2.86039	2.19433	0.0987305	-0.00967575	0.026529	0.00174296	2.316	0.0952999	-0.00576847	0.0055938	0.00675999	-13.8251	0.0994869	0.0491113	0.0176178	0.0113045	3.75531	0.094685	-0.0285715	0.0109489	0.0156389	-2.37756
1.12984	2.8629	2.19219	0.0990234	-0.00755913	0.0268244	0.0016702	2.52759	0.095289	0.00197602	0.00570406	0.00669106	17.2946	0.0995442	0.0495849	0.0182322	0.0110016	4.21053	0.0946538	-0.0255273	0.0115195	0.0153639	-2.00919
1.131	2.8654	2.19008	0.098291	-0.00577272	0.0271292	0.00160884	2.73912	0.0952924	-0.00915645	0.0058139	0.00662278	-11.9738	0.099602	0.0500069	0.0188499	0.0106984	4.65349	0.0946262	-0.0224263	0.0120939	0.0150893	-1.63897
1.13216	2.86788	2.18798	0.098291	-0.00319212	0.0274575	0.00157046	2.95093	0.0952744	-0.00444241	0.00592631	0.00655354	-14.8314	0.0996602	0.0504078	0.0194709	0.0103951	5.08579	0.0946022	-0.0192688	0.0126719	0.0148151	-1.26713
1.13332	2.87033	2.18589	0.0991699	-0.000615574	0.0278191	0.00156428	3.1688	0.0952666	0.00520929	0.00603862	0.00648476	14.2263	0.0997189	0.0508144	0.0200951	0.0100916	5.50907	0.0945819	-0.0160546	0.0132533	0.0145414	-0.893972
1.13448	2.87277	2.18382	0.0990234	0.000998373	0.0281555	0.00152367	3.39154	0.0952768	-0.00220403	0.00615008	0.00641678	-17.0288	0.0997781	0.0512495	0.0207226	0.00978786	5.92492	0.0945653	-0.0127831	0.013838	0.0142681	-0.519683
1.13564	2.87519	2.18177	0.0991699	0.00277389	0.0284634	0.00144781	3.61207	0.0952736	0.009991	0.00626346	0.00634821	11.6396	0.0998378	0.0517325	0.0213532	0.00948399	6.33487	0.0945525	-0.00945362	0.014426	0.0139952	-0.144194
1.1368	2.87759	2.17974	0.0990234	0.00439263	0.028774	0.00136758	3.83406	0.0952951	0.00833042	0.00637529	0.00628071	12.3462	0.0998981	0.052279	0.0219868	0.00917994	6.74031	0.0945437	-0.00606635	0.0150171	0.0137227	0.233117
1.13796	2.87996	2.17772	0.0990234	0.00617724	0.0290956	0.00129606	4.05524	0.0953127	0.00484794	0.00648815	0.00621301	14.5032	0.0999591	0.0529016	0.0226235	0.00887572	7.14251	0.0945387	-0.0026239	0.015611	0.0134506	0.613564
1.13912	2.88232	2.17572	0.0991699	0.0079697	0.0294371	0.00124479	4.27628	0.0953227	-0.00200734	0.0066024	0.00614499	-17.2576	0.100021	0.0536101	0.023263	0.00857132	7.54258	0.0945378	0.000867357	0.0162078	0.0131789	0.992808
1.14028	2.88466	2.17374	0.0991699	0.00961197	0.0298097	0.00122221	4.49931	0.0953204	0.0112705	0.00671851	0.00607645	11.1986	0.100084	0.0544115	0.0239054	0.00826675	7.94147	0.0945409	0.00443679	0.0168073	0.0129076	1.36296
1.14144	2.88698	2.17178	0.0990234	0.0112664	0.0301946	0.00120351	4.72442	0.0953464	0.0126703	0.00683253	0.00600907	10.8001	0.100147	0.0553111	0.0245504	0.007962	8.33998	0.0945482	0.00807784	0.0174092	0.0126366	1.74327
1.1426	2.88927	2.16983	0.0991699	0.0130955	0.030555	0.00114992	4.94969	0.095341	0.00524479	0.00695032	0.0059404	14.1999	0.100212	0.0563121	0.025198	0.00765708	8.73874	0.0945598	0.0117686	0.0180135	0.0123659	2.13443
1.14376	2.89155	2.1679	0.0993164	0.0147809	0.0309139	0.00108694	5.17695	0.0953524	-0.000301893	0.0070671	0.00587241	-19.5357	0.100278	0.0574163	0.0258482	0.00735199	9.13827	0.0945756	0.0154862	0.01862	0.0120956	2.53631
1.14492	2.8938	2.16599	0.0991699	0.0163248	0.0312834	0.00102767	5.40589	0.0953539	0.0156986	0.00718556	0.00580401	10.1679	0.100345	0.0586245	0.0265006	0.00704672	9.53894	0.0945957	0.0192082	0.0192285	0.0118255	2.9487
1.14608	2.89604	2.16409	0.0990234	0.0180497	0.0316647	0.000985974	5.63058	0.0953563	0.0156253	0.00730458	0.00573565	10.1802	0.100414	0.0599364	0.0271554	0.00674128	9.94103	0.0946201	0.0229125	0.019839	0.0115557	3.37115
1.14724	2.89825	2.16221	0.0984375	0.0199578	0.0320752	0.000971096	5.85695	0.0953588	0.0158105	0.00742426	0.00566729	10.1494	0.100484	0.0613512	0.0278123	0.00643565	10.3447	0.0946488	0.0265785	0.0204512	0.0112862	3.80298
1.1484	2.90044	2.16036	0.098291	0.0225324	0.0325103	0.000966748	6.0904	0.0953619	0.0168679	0.00754453	0.00559895	9.98827	0.100556	0.0628678	0.0284711	0.00612985	10.75	0.0946816	0.0301872	0.0210651	0.0110169	4.24325
1.14956	2.90261	2.15851	0.103418	0.025296	0.0329222	0.000927212	6.33053	0.0953671	0.0211181	0.0076652	0.00553069	9.53849	0.10063	0.0644846	0.0291319	0.00582385	11.1569	0.0947186	0.0337218	0.0216806	0.0107478	4.6909
1.15072	2.90476	2.15669	0.101514	0.022481	0.0333186	0.000869483	6.57517	0.0953794	-0.00402509	0.00778571	0.00546269	-15.1897	0.100706	0.0662002	0.0297944	0.00551766	11.5655	0.0947596	0.037168	0.0222975	0.0104788	5.1447
1.15188	2.90689	2.15489	0.098291	0.0217785	0.0337255	0.000811308	6.79626	0.0953745	0.00966655	0.00790878	0.00539404	11.7648	0.100784	0.068013	0.0304585	0.00521126	11.9755	0.0948045	0.0405147	0.0229157	0.0102101	5.60336
1.15304	2.90899	2.1531	0.0993164	0.0246304	0.0341373	0.00076656	6.998	0.0953982	0.0115276	0.00802919	0.00532644	11.1193	0.100864	0.0699217	0.031124	0.00490466	12.3869	0.0948532	0.0437532	0.0235352	0.00994138	6.0656
1.1542	2.91108	2.15133	0.0994629	0.0263914	0.0345761	0.000748353	7.20726	0.0953919	0.00530832	0.0081537	0.00525774	14.1529	0.100946	0.0719251	0.0317909	0.00459783	12.7994	0.0949056	0.0468781	0.0241559	0.0096728	6.53015
1.15536	2.91314	2.14958	0.0994629	0.0280256	0.0350486	0.000761313	7.41888	0.095405	0.00222804	0.00827652	0.00518974	17.0013	0.101031	0.0740225	0.0324589	0.00429077	13.2129	0.0949616	0.0498866	0.0247776	0.00940428	6.99583
1.15652	2.91518	2.14785	0.0984375	0.0296954	0.035506	0.000742698	7.63387	0.0954117	-0.00374115	0.00840068	0.0051215	-15.4459	0.101118	0.0762131	0.033128	0.00398347	13.6273	0.0950209	0.0527786	0.0254004	0.0091358	7.46155
1.15768	2.9172	2.14614	0.0993164	0.0325249	0.0359418	0.00068861	7.85091	0.0954081	0.0114067	0.00852672	0.0050529	11.1562	0.101207	0.0784967	0.0337979	0.00367592	14.0422	0.0950835	0.0555561	0.0260241	0.00886733	7.92637
1.15884	2.9192	2.14445	0.101221	0.034434	0.0363869	0.000632296	8.07834	0.0954024	0.00640816	0.00865362	0.00498423	13.4037	0.1013	0.0808733	0.0344686	0.0033681	14.4575	0.0951492	0.0582232	0.0266487	0.00859886	8.38949
1.16	2.92117	2.14277	0.0994629	0.0343028	0.0368439	0.000583759	8.30791	0.0954187	0.00557189	0.00877834	0.00491631	13.9625	0.101395	0.0833434	0.0351398	0.00306	14.8729	0.0952179	0.0607856	0.0272741	0.00833034	8.85027
1.16116	2.92312	2.14112	0.0993164	0.0361388	0.0373129	0.000556107	8.52183	0.0954333	0.00402962	0.00890383	0.00484831	15.1857	0.101493	0.0859074	0.0358114	0.0027516	15.2884	0.0952895	0.0632504	0.0279003	0.00806177	9.30821
1.16232	2.92505	2.13948	0.0993164	0.038181	0.037813	0.000560153	8.73685	0.0954445	0.00107263	0.00903028	0.0047802	18.4372	0.101595	0.0885664	0.0364833	0.00244289	15.7037	0.0953639	0.0656254	0.0285272	0.00779313	9.76287
1.16348	2.92696	2.13786	0.0996094	0.0402717	0.038323	0.000565685	8.9563	0.0954497	-0.00469304	0.00915808	0.00471188	-14.6263	0.101699	0.0913214	0.0371552	0.00213385	16.1186	0.095441	0.0679195	0.0291546	0.00752439	10.2139
1.16464	2.92884	2.13627	0.100195	0.0420929	0.038812	0.00053397	9.18112	0.0954451	0.0110785	0.00928773	0.00464325	11.2597	0.101806	0.0941737	0.037827	0.00182447	16.5329	0.0955207	0.0701421	0.0297827	0.00725554	10.6612
1.1658	2.9307	2.13469	0.100049	0.0433263	0.0393076	0.000495959	9.41051	0.09544	0.00762766	0.00941804	0.0045746	12.6996	0.101917	0.0971249	0.0384985	0.00151472	16.9466	0.0956029	0.072303	0.0304112	0.00698656	11.1044
1.16696	2.93254	2.13313	0.100635	0.0447749	0.0398205	0.000464776	9.64075	0.0954605	0.0100051	0.00954536	0.00450675	11.6342	0.102032	0.100177	0.0391695	0.00120459	17.3596	0.0956876	0.0744123	0.0310401	0.00671743	11.5436
1.16812	2.93436	2.13159	0.0999023	0.0456393	0.0403391	0.000452778	9.86222	0.0954884	0.0165718	0.00967215	0.00443911	10.031	0.10215	0.10333	0.0398399	0.000894057	17.7716	0.0957746	0.0764799	0.0316694	0.00644815	11.9787
1.16928	2.93615	2.13007	0.100049	0.047363	0.040884	0.000469248	10.0777	0.095496	-0.0115716	0.00980226	0.00437083	-11.106	0.102272	0.106588	0.0405094	0.000583096	18.1827	0.095864	0.0785159	0.0322989	0.00617869	12.4097
1.17044	2.93792	2.12857	0.0999023	0.0489866	0.0414374	0.000487863	10.2945	0.0954786	-0.000616888	0.00993647	0.00430182	-19.0721	0.102397	0.109951	0.0411779	0.000271685	18.5926	0.0959557	0.0805302	0.0329286	0.00590904	12.8366
1.1716	2.93967	2.12708	0.0977051	0.0508327	0.0419706	0.000470681	10.5134	0.0954823	0.020835	0.0100682	0.00423342	9.56072	0.102527	0.113421	0.0418451	1e-06	19.0015	0.0960498	0.0825323	0.0335585	0.00563919	13.2597
1.17276	2.94139	2.12562	0.0997559	0.0551479	0.0425012	0.000440926	10.7347	0.095497	0.00230733	0.0101988	0.00416534	16.9112	0.10266	0.116822	0.0425109	1e-06	19.3983	0.0961461	0.0845316	0.0341883	0.00536913	13.6789
1.17392	2.94309	2.12418	0.100049	0.0572888	0.0430494	0.000414054	10.9769	0.095506	-2.94571e-05	0.0103307	0.00409709	-19.9538	0.102798	0.120077	0.0431753	1e-06	19.7782	0.0962447	0.0865367	0.0348181	0.00509885	14.0945
1.17508	2.94477	2.12276	0.100342	0.0591818	0.0435995	0.000403978	11.2133	0.0955112	0.0229977	0.0104636	0.00402873	9.41168	0.102939	0.123224	0.0438382	1e-06	20.143	0.0963457	0.0885562	0.0354477	0.00482833	14.5065
1.17624	2.94642	2.12136	0.100195	0.0608294	0.0441701	0.000419209	11.448	0.0955293	0.00702025	0.0105951	0.00396071	13.035	0.103083	0.126292	0.0444995	1e-06	20.4943	0.0964489	0.0905979	0.036077	0.00455756	14.9152
1.1774	2.94805	2.11998	0.100488	0.0627145	0.0447424	0.000435747	11.6802	0.0955501	0.0111334	0.0107266	0.00389275	11.2421	0.103232	0.129311	0.0451592	1e-06	20.8339	0.0965546	0.0926694	0.0367059	0.00428654	15.3208
1.17856	2.94965	2.11862	0.100488	0.0643586	0.0453135	0.00042572	11.9212	0.0955478	0.0122385	0.0108621	0.00382417	10.9147	0.103383	0.132303	0.0458172	1e-06	21.1631	0.0966626	0.0947774	0.0373342	0.00401524	15.7233
1.17972	2.95123	2.11728	0.100635	0.0660844	0.0458754	0.00038989	12.1654	0.0955485	0.0166266	0.0109977	0.00375567	10.0229	0.103539	0.135289	0.0464734	1e-06	21.4833	0.096773	0.0969284	0.037962	0.00374366	16.123
1.18088	2.95279	2.11595	0.100635	0.0677337	0.0464529	0.00035223	12.4155	0.0955579	-0.00559402	0.0111323	0.00368738	-13.9468	0.103697	0.138287	0.0471277	1e-06	21.7957	0.096886	0.0991283	0.038589	0.00347179	16.52
1.18204	2.95432	2.11465	0.100928	0.0694691	0.0470344	0.000327414	12.6592	0.0955538	0.0132502	0.0112695	0.00361875	10.657	0.10386	0.141309	0.04778	1e-06	22.1015	0.0970015	0.101383	0.0392151	0.00319962	16.9144
1.1832	2.95583	2.11337	0.100488	0.070972	0.047626	0.000324709	12.8961	0.0955573	0.0221392	0.0114059	0.00355032	9.4654	0.104025	0.14437	0.04843	1e-06	22.4017	0.0971196	0.103696	0.0398402	0.00292713	17.3066
1.18436	2.95732	2.11212	0.100781	0.073046	0.0482198	0.000323964	13.1292	0.0955752	0.00772028	0.0115404	0.00348222	12.651	0.104194	0.147477	0.0490777	1e-06	22.6969	0.0972404	0.106073	0.0404642	0.00265431	17.6965
1.18552	2.95878	2.11088	0.100781	0.074892	0.0488222	0.000324406	13.3653	0.0955997	0.0150998	0.0116741	0.00341426	10.2722	0.104367	0.15064	0.0497229	1e-06	22.9882	0.097364	0.108517	0.0410869	0.00238114	18.0843
1.18668	2.96021	2.10966	0.100781	0.0768332	0.0494153	0.000296592	13.6064	0.0956073	-0.00867261	0.0118111	0.0033459	-12.1866	0.104544	0.153862	0.0503655	1e-06	23.276	0.0974904	0.111032	0.0417081	0.00210762	18.4701
1.18784	2.96162	2.10846	0.100928	0.0788718	0.05002	0.000264506	13.8532	0.0955984	0.00897401	0.0119513	0.00327716	12.0523	0.104724	0.15715	0.0510053	1e-06	23.5609	0.0976198	0.113622	0.0423277	0.00183373	18.8542
1.189	2.96301	2.10729	0.0997559	0.0808503	0.0506354	0.000241278	14.1005	0.0955919	0.008359	0.0120915	0.00320848	12.3326	0.104909	0.160505	0.0516422	1e-06	23.8434	0.0977521	0.116287	0.0429456	0.00155945	19.2365
1.19016	2.96437	2.10613	0.0997559	0.0842139	0.0512492	0.00024005	14.3363	0.0956194	0.0182617	0.0122262	0.00314054	9.80984	0.105097	0.163929	0.0522759	1e-06	24.124	0.0978876	0.119032	0.0435615	0.00128478	19.6171
1.19132	2.96571	2.10499	0.101514	0.0876843	0.0518669	0.000246101	14.5777	0.0956328	0.00266324	0.0123637	0.00307227	16.519	0.105289	0.167422	0.0529063	1e-06	24.403	0.0980263	0.121857	0.0441754	0.00100968	19.9963
1.19248	2.96702	2.10388	0.101367	0.0893424	0.0524884	0.000253238	14.8277	0.0956451	0.00470097	0.0125017	0.00300398	14.62	0.105485	0.170985	0.0535333	1e-06	24.6806	0.0981682	0.124764	0.0447871	0.000734146	20.3739
1.19364	2.96831	2.10279	0.101074	0.0912743	0.053089	0.00022893	15.0767	0.0956625	0.00955405	0.0126392	0.00293578	11.8096	0.105686	0.174615	0.0541566	1e-06	24.9571	0.0983136	0.127753	0.0453964	0.000458161	20.7502
1.1948	2.96958	2.10172	0.100488	0.0936426	0.0536887	0.00019484	15.3271	0.0956592	0.0126275	0.0127808	0.00286715	10.8111	0.10589	0.178312	0.0547762	1e-06	25.2327	0.0984624	0.130827	0.0460031	0.000181705	21.1252
1.19596	2.97082	2.10067	0.101074	0.096771	0.0543063	0.000165647	15.5846	0.0956636	0.0258765	0.0129213	0.00279868	9.27287	0.106099	0.182072	0.0553918	1e-06	25.5074	0.0986148	0.133985	0.046607	2.79014e-05	21.4583
1.19712	2.97203	2.09964	0.101074	0.099381	0.0549153	0.000153709	15.8357	0.0956879	0.0157422	0.0130585	0.00273058	10.1607	0.106313	0.185893	0.0560033	1e-06	25.7816	0.0987708	0.13718	0.0472081	1e-06	21.7476
1.19828	2.97322	2.09863	0.10166	0.102117	0.0555374	0.000169084	16.0836	0.0956983	-0.00111802	0.0131985	0.0026622	-18.3762	0.106531	0.189772	0.0566105	1e-06	26.0551	0.0989304	0.140415	0.0478062	1e-06	22.0263
1.19944	2.97438	2.09764	0.101807	0.104342	0.0561571	0.000186998	16.3317	0.0957043	0.0267806	0.0133398	0.00259373	9.23981	0.106753	0.193704	0.0572133	1e-06	26.3281	0.0990938	0.143684	0.0484011	1e-06	22.303
1.2006	2.97552	2.09668	0.1021	0.106539	0.0567869	0.000183454	16.5929	0.0957301	0.0175692	0.0134774	0.00252561	9.89405	0.10698	0.197686	0.0578115	1e-06	26.6006	0.0992609	0.146988	0.0489927	1e-06	22.578
1.20176	2.97663	2.09573	0.101807	0.10855	0.0574098	0.00015535	16.8597	0.0957439	0.00445512	0.0136177	0.00245726	14.8209	0.107212	0.201714	0.058405	1e-06	26.8726	0.0994318	0.150325	0.0495809	1e-06	22.8512
1.20292	2.97772	2.09481	0.101953	0.11102	0.0580505	0.000130543	17.1318	0.0957622	0.0112135	0.0137574	0.00238897	11.2166	0.107448	0.205784	0.0589936	1e-06	27.144	0.0996064	0.153698	0.0501655	1e-06	23.1226
1.20408	2.97878	2.09391	0.102393	0.11347	0.058685	0.000120622	17.3953	0.095765	0.0235028	0.0139004	0.00232042	9.38303	0.107689	0.209891	0.0595772	1e-06	27.4149	0.099785	0.157106	0.0507464	1e-06	23.3923
1.20524	2.97982	2.09303	0.102393	0.115584	0.0593228	0.000135648	17.6504	0.0957873	0.0145778	0.0140398	0.00225217	10.3707	0.107935	0.21403	0.0601557	1e-06	27.6852	0.0999674	0.160548	0.0513236	1e-06	23.6603
1.2064	2.98083	2.09217	0.102832	0.117844	0.0599506	0.000150846	17.8988	0.0957969	-0.0013445	0.014182	0.00218372	-18.0777	0.108186	0.218198	0.0607289	1e-06	27.9549	0.100154	0.164024	0.0518968	1e-06	23.9265
1.20756	2.98182	2.09133	0.102686	0.119773	0.060584	0.000168559	18.148	0.0958034	0.0285364	0.0143252	0.00211521	9.18661	0.108441	0.222389	0.0612968	1e-06	28.2238	0.100344	0.167533	0.0524659	1e-06	24.1911
1.20872	2.98278	2.09052	0.102686	0.122014	0.061213	0.000162468	18.4018	0.0958323	0.0212785	0.0144638	0.00204701	9.5263	0.108702	0.2266	0.0618591	1e-06	28.492	0.100539	0.171075	0.0530308	1e-06	24.454
1.20988	2.98371	2.08973	0.102686	0.12441	0.061856	0.000155033	18.6619	0.0958523	0.0126916	0.0146046	0.00197866	10.7947	0.108967	0.230826	0.0624159	1e-06	28.7593	0.100737	0.174649	0.0535914	1e-06	24.7152
1.21104	2.98462	2.08895	0.102979	0.126965	0.0625025	0.000160192	18.9181	0.0958593	-0.0061932	0.0147483	0.00191013	-13.541	0.109237	0.235062	0.062967	1e-06	29.0256	0.10094	0.178254	0.0541475	1e-06	24.9746
1.2122	2.98551	2.08821	0.103125	0.129359	0.0631415	0.000188023	19.1619	0.095858	0.0193809	0.0148941	0.00184149	9.69018	0.109512	0.239306	0.0635122	1e-06	29.2908	0.101146	0.181888	0.0546991	1e-06	25.2323
1.21336	2.98636	2.08748	0.103564	0.131758	0.0637629	0.000215318	19.3968	0.0958758	0.0107992	0.015036	0.00177308	11.3517	0.109792	0.243551	0.0640516	1e-06	29.5549	0.101357	0.185551	0.055246	1e-06	25.4882
1.21452	2.9872	2.08677	0.103418	0.133843	0.0643825	0.000245211	19.6292	0.0958796	0.0271322	0.0151811	0.0017045	9.22806	0.110077	0.247795	0.064585	1e-06	29.8178	0.101572	0.18924	0.0557881	1e-06	25.7424
1.21568	2.988	2.08609	0.103564	0.136258	0.064993	0.000251396	19.8644	0.0959076	0.0211644	0.0153211	0.00163618	9.53495	0.110367	0.252034	0.0651124	1e-06	30.0793	0.101791	0.192956	0.0563253	1e-06	25.9947
1.21684	2.98878	2.08543	0.103711	0.138686	0.0656047	0.000247827	20.1036	0.0959283	0.0141776	0.0154628	0.00156776	10.4514	0.110662	0.256264	0.0656337	1e-06	30.3393	0.102015	0.196696	0.0568574	1e-06	26.2452
1.218	2.98954	2.08479	0.103711	0.141129	0.0662323	0.000251547	20.347	0.095939	0.00201159	0.015607	0.00149923	17.2526	0.110962	0.260481	0.0661488	1e-06	30.5977	0.102243	0.20046	0.0573845	1e-06	26.4938
1.21916	2.99026	2.08417	0.103857	0.143752	0.0668463	0.000274955	20.575	0.0959536	0.00922678	0.0157505	0.00143072	11.944	0.111266	0.264683	0.0666577	1e-06	30.8545	0.102475	0.204244	0.0579063	1e-06	26.7404
1.22032	2.99097	2.08357	0.103857	0.146397	0.0674382	0.000295614	20.7938	0.0959547	0.0222877	0.0158972	0.00136207	9.45563	0.111576	0.268866	0.0671603	1e-06	31.1095	0.102711	0.208049	0.0584228	1e-06	26.9851
1.22148	2.99164	2.083	0.104297	0.149228	0.0680227	0.000317422	21.0089	0.0959774	0.0166971	0.0160391	0.00129362	10.0127	0.11189	0.273028	0.0676566	1e-06	31.3627	0.102952	0.211873	0.0589338	1e-06	27.2278
1.22264	2.99229	2.08245	0.10415	0.151767	0.0686253	0.000328011	21.239	0.0959927	0.00886743	0.0161829	0.00122508	12.0991	0.112209	0.277165	0.0681466	1e-06	31.6139	0.103197	0.215713	0.0594393	1e-06	27.4685
1.2238	2.99292	2.08192	0.105615	0.154659	0.0692283	0.000319646	21.4768	0.0959935	0.0222705	0.0163302	0.00115642	9.45676	0.112533	0.281275	0.0686301	1e-06	31.863	0.103447	0.219569	0.0599392	1e-06	27.707
1.22496	2.99352	2.08141	0.104736	0.156145	0.0698494	0.000317111	21.7228	0.0960166	0.0174558	0.0164724	0.00108793	9.90865	0.112862	0.285355	0.0691073	1e-06	32.11	0.103701	0.223439	0.0604334	1e-06	27.9435
1.22612	2.99409	2.08093	0.104883	0.15879	0.0704562	0.000331249	21.9481	0.0960334	0.0110688	0.0166161	0.00101937	11.2629	0.113195	0.289404	0.069578	1e-06	32.3548	0.10396	0.227321	0.0609219	1e-06	28.1777
1.22728	2.99463	2.08046	0.104883	0.161477	0.0710337	0.000342708	22.1602	0.0960399	-0.00480081	0.0167625	0.000950727	-14.5404	0.113533	0.293419	0.0700422	1e-06	32.5972	0.104223	0.231214	0.0614044	1e-06	28.4098
1.22844	2.99515	2.08002	0.10459	0.164369	0.0715984	0.000355377	22.3658	0.0960429	0.0266396	0.0169099	0.000882058	9.24469	0.113876	0.297398	0.0705	1e-06	32.8373	0.10449	0.235116	0.0618811	1e-06	28.6396
1.2296	2.99564	2.07961	0.105176	0.16779	0.0721742	0.000380119	22.5732	0.096072	0.0235393	0.0170509	0.000813536	9.38104	0.114223	0.30134	0.0709513	1e-06	33.0749	0.104762	0.239026	0.0623517	1e-06	28.8671
1.23076	2.99611	2.07921	0.105322	0.170783	0.0727486	0.000385198	22.7925	0.0960974	0.0202552	0.017193	0.000744971	9.60914	0.114575	0.305243	0.0713961	1e-06	33.31	0.105038	0.242943	0.0628163	1e-06	29.0923
1.23192	2.99655	2.07884	0.106201	0.173832	0.0733409	0.000394641	23.0207	0.0961188	0.0164669	0.017336	0.000676367	10.0465	0.114931	0.309105	0.0718344	1e-06	33.5426	0.105319	0.246864	0.0632747	1e-06	29.3152
1.23308	2.99696	2.07849	0.105322	0.176141	0.0739326	0.000416206	23.2456	0.0961352	0.0112847	0.0174804	0.000607725	11.1942	0.115292	0.312926	0.0722663	1e-06	33.7725	0.105605	0.250788	0.0637269	1e-06	29.5356
1.23424	2.99735	2.07816	0.106201	0.179634	0.0744887	0.000435975	23.4515	0.0961432	-0.000434522	0.017627	0.000539038	-19.3379	0.115657	0.316703	0.0726917	1e-06	33.9997	0.105895	0.254714	0.0641729	1e-06	29.7536
1.2354	2.99771	2.07785	0.106348	0.182394	0.0750231	0.000456298	23.651	0.0961546	0.0404657	0.0177727	0.000470354	9.03395	0.116027	0.320437	0.0731106	1e-06	34.2241	0.106189	0.258641	0.0646125	1e-06	29.9691
1.23656	2.99805	2.07757	0.106641	0.185225	0.0755567	0.000486497	23.8463	0.0962009	0.0393653	0.0179096	0.000401761	9.03973	0.116401	0.324126	0.0735231	1e-06	34.4458	0.106488	0.262566	0.0650458	1e-06	30.1821
1.23772	2.99836	2.07731	0.106641	0.187971	0.07608	0.000495619	24.0457	0.096246	0.038473	0.0180467	0.000333128	9.04513	0.116779	0.327768	0.0739292	1e-06	34.6647	0.106791	0.26649	0.0654728	1e-06	30.3926
1.23888	2.99864	2.07707	0.106787	0.190955	0.0766046	0.000498397	24.2483	0.0962902	0.0377906	0.0181839	0.000264457	9.04975	0.117161	0.331365	0.0743289	1e-06	34.8807	0.107099	0.270409	0.0658932	1e-06	30.6005
1.24004	2.99889	2.07685	0.107227	0.194021	0.0771443	0.00051188	24.4551	0.0963337	0.0373205	0.0183213	0.000195749	9.0532	0.117548	0.334914	0.0747222	1e-06	35.0939	0.107412	0.274323	0.0663072	1e-06	30.8058
1.2412	2.99912	2.07666	0.107373	0.196853	0.0776633	0.000533761	24.6501	0.0963769	0.037066	0.0184587	0.000127006	9.05518	0.117938	0.338415	0.0751092	1e-06	35.3042	0.107729	0.278231	0.0667147	1e-06	31.0085
1.24236	2.99933	2.07648	0.107666	0.199774	0.0781508	0.00055322	24.8309	0.0964198	0.0370306	0.018596	5.82276e-05	9.05545	0.118333	0.341869	0.0754899	1e-06	35.5115	0.10805	0.282131	0.0671157	1e-06	31.2086
1.24352	2.9995	2.07633	0.107666	0.202628	0.0786289	0.000575706	25.0065	0.0964629	0.0372185	0.0187332	1e-06	9.05399	0.118731	0.345274	0.0758643	1e-06	35.7159	0.108376	0.286021	0.0675101	1e-06	31.4059
1.24468	2.99965	2.07621	0.106348	0.20574	0.0791271	0.00058885	25.1961	0.0965062	0.0375892	0.0188703	1e-06	9.0512	0.119134	0.34863	0.0762324	1e-06	35.9174	0.108707	0.289902	0.0678979	1e-06	31.6006
1.24584	2.99977	2.0761	0.108252	0.210555	0.0796234	0.000584146	25.3938	0.0965501	0.0381231	0.019007	1e-06	9.04744	0.11954	0.351937	0.0765943	1e-06	36.1159	0.109042	0.293771	0.0682792	1e-06	31.7926
1.247	2.99987	2.07602	0.108398	0.213554	0.0801378	0.000586382	25.6095	0.0965947	0.038822	0.0191435	1e-06	9.04293	0.11995	0.355195	0.0769501	1e-06	36.3114	0.109381	0.297627	0.0686538	1e-06	31.9818
1.24816	2.99994	2.07596	0.108398	0.216664	0.0806355	0.000606408	25.8106	0.0966403	0.0396869	0.0192796	1e-06	9.03794	0.120364	0.358404	0.0772998	1e-06	36.504	0.109725	0.30147	0.0690218	1e-06	32.1683
1.24932	2.99998	2.07593	0.108838	0.220048	0.0810936	0.00062178	25.9959	0.0966869	0.0407181	0.0194152	1e-06	9.03275	0.120782	0.361563	0.0776433	1e-06	36.6936	0.110073	0.305297	0.0693831	1e-06	32.3521
1.25048	3	2.07591	0.10957	0.223231	0.08153	0.000637941	26.1733	0.0967348	0.0419152	0.0195504	1e-06	9.0276	0.121203	0.364673	0.0779809	1e-06	36.8803	0.110426	0.309108	0.0697379	1e-06	32.533
1.25164	2.99999	2.07592	0.109277	0.225896	0.0819769	0.000669634	26.3514	0.0967842	0.0432774	0.0196849	1e-06	9.02272	0.121628	0.367734	0.0783124	1e-06	37.0639	0.110783	0.312902	0.070086	1e-06	32.7112
1.2528	2.99995	2.07595	0.109424	0.229168	0.0824193	0.000682031	26.534	0.0968353	0.0448029	0.0198188	1e-06	9.01827	0.122056	0.370746	0.078638	1e-06	37.2447	0.111144	0.316678	0.0704275	1e-06	32.8866
1.25396	2.99989	2.076	0.109717	0.232571	0.0828749	0.000699168	26.7236	0.0968882	0.04649	0.019952	1e-06	9.01436	0.122488	0.373708	0.0789577	1e-06	37.4224	0.11151	0.320434	0.0707623	1e-06	33.0591
1.25512	2.9998	2.07608	0.110156	0.235949	0.0833296	0.000731139	26.9097	0.0969432	0.0483365	0.0200844	1e-06	9.01103	0.122923	0.376622	0.0792715	1e-06	37.5973	0.11188	0.32417	0.0710906	1e-06	33.2289
1.25628	2.99969	2.07618	0.10957	0.239145	0.0837342	0.000757839	27.0765	0.0970004	0.05034	0.0202159	1e-06	9.00828	0.123361	0.379487	0.0795796	1e-06	37.7692	0.112254	0.327885	0.0714122	1e-06	33.3958
1.25744	2.99954	2.0763	0.111914	0.243286	0.0841073	0.000783177	27.2301	0.09706	0.0524983	0.0203465	1e-06	9.00609	0.123803	0.382303	0.0798819	1e-06	37.9382	0.112633	0.331578	0.0717273	1e-06	33.5599
1.2586	2.99937	2.07644	0.111035	0.24517	0.0844825	0.000823456	27.3862	0.0971223	0.054809	0.0204761	1e-06	9.00437	0.124248	0.385071	0.0801785	1e-06	38.1043	0.113016	0.335247	0.0720358	1e-06	33.7212
1.25976	2.99918	2.07661	0.111035	0.248328	0.0848487	0.000845409	27.5393	0.0971872	0.0572699	0.0206047	1e-06	9.00308	0.124697	0.387791	0.0804694	1e-06	38.2675	0.113403	0.338893	0.0723378	1e-06	33.8797
1.26092	2.99896	2.0768	0.111475	0.251801	0.0852156	0.000864562	27.6956	0.0972552	0.0598789	0.0207321	1e-06	9.00212	0.125148	0.390464	0.0807548	1e-06	38.4278	0.113794	0.342513	0.0726332	1e-06	34.0353
1.26208	2.99871	2.07701	0.111914	0.255113	0.0855916	0.00089411	27.8554	0.0973262	0.062634	0.0208583	1e-06	9.00143	0.125603	0.393089	0.0810347	1e-06	38.5853	0.11419	0.346108	0.0729222	1e-06	34.1881
1.26324	2.99843	2.07724	0.112354	0.258268	0.0859166	0.000915495	27.996	0.0974005	0.0655332	0.0209832	1e-06	9.00095	0.12606	0.395667	0.081309	1e-06	38.74	0.114589	0.349676	0.0732047	1e-06	34.3381
1.2644	2.99813	2.0775	0.111035	0.26127	0.086208	0.000935718	28.1221	0.0974783	0.0685745	0.0211068	1e-06	9.00061	0.12652	0.398198	0.081578	1e-06	38.8918	0.114993	0.353217	0.0734807	1e-06	34.4852
1.26556	2.99781	2.07777	0.112354	0.266046	0.086495	0.000969525	28.241	0.0975597	0.0717562	0.0212289	1e-06	9.00039	0.126984	0.400682	0.0818415	1e-06	39.0409	0.115401	0.35673	0.0737504	1e-06	34.6296
1.26672	2.99745	2.07807	0.113086	0.269717	0.0868003	0.00100069	28.3812	0.0976448	0.0750763	0.0213496	1e-06	9.00024	0.12745	0.403121	0.0820998	1e-06	39.1872	0.115813	0.360214	0.0740137	1e-06	34.7711
1.26788	2.99707	2.0784	0.112939	0.272929	0.0871043	0.0010184	28.5309	0.0977339	0.078533	0.0214687	1e-06	9.00015	0.127919	0.405514	0.0823528	1e-06	39.3308	0.116229	0.363669	0.0742707	1e-06	34.9098
1.26904	2.99666	2.07874	0.113672	0.276648	0.0874265	0.00104671	28.687	0.0978271	0.0821243	0.0215862	1e-06	9.00009	0.128391	0.407861	0.0826006	1e-06	39.4717	0.116648	0.367094	0.0745214	1e-06	35.0458
1.2702	2.99623	2.07911	0.113965	0.279916	0.0877025	0.00106472	28.8296	0.0979245	0.0858484	0.021702	1e-06	9.00005	0.128865	0.410164	0.0828432	1e-06	39.6098	0.117072	0.370487	0.0747659	1e-06	35.1789
1.27136	2.99577	2.0795	0.114258	0.28322	0.0879364	0.00107943	28.955	0.0980263	0.0897031	0.021816	1e-06	9.00003	0.129342	0.412422	0.0830808	1e-06	39.7453	0.1175	0.373849	0.0750042	1e-06	35.3093
1.27252	2.99528	2.07991	0.114697	0.286562	0.0881571	0.00110713	29.0711	0.0981327	0.0936865	0.0219282	1e-06	9.00002	0.129822	0.414636	0.0833133	1e-06	39.8782	0.117932	0.37718	0.0752363	1e-06	35.437
1.27368	2.99477	2.08035	0.114404	0.289787	0.0883882	0.00115406	29.1871	0.0982437	0.0977964	0.0220385	1e-06	9.00001	0.130304	0.416807	0.0835409	1e-06	40.0084	0.118367	0.380477	0.0754624	1e-06	35.5618
1.27484	2.99423	2.0808	0.11543	0.2937	0.0886168	0.00118696	29.3097	0.0983596	0.102031	0.0221468	1e-06	9.00001	0.130789	0.418934	0.0837635	1e-06	40.136	0.118806	0.383742	0.0756824	1e-06	35.684
1.276	2.99367	2.08128	0.115723	0.296864	0.0888603	0.00122757	29.4425	0.0984805	0.106387	0.0222531	1e-06	9	0.131276	0.421018	0.0839812	1e-06	40.2611	0.119249	0.386972	0.0758964	1e-06	35.8034
1.27716	2.99308	2.08178	0.115869	0.300085	0.0890756	0.00125811	29.5674	0.0986065	0.110863	0.0223574	1e-06	9	0.131766	0.42306	0.0841941	1e-06	40.3836	0.119696	0.390169	0.0761044	1e-06	35.9201
1.27832	2.99246	2.08231	0.116309	0.303526	0.0892412	0.00128327	29.6722	0.0987377	0.115456	0.0224594	1e-06	9	0.132258	0.42506	0.0844023	1e-06	40.5036	0.120147	0.393331	0.0763066	1e-06	36.0342
1.27948	2.99182	2.08285	0.116602	0.306871	0.0893821	0.00131704	29.7648	0.0988744	0.120164	0.0225593	1e-06	9	0.132752	0.427019	0.0846058	1e-06	40.6211	0.120601	0.396458	0.0765029	1e-06	36.1456
1.28064	2.99115	2.08342	0.117188	0.310285	0.0895288	0.00136952	29.8555	0.0990165	0.124984	0.0226568	1e-06	9	0.133248	0.428936	0.0848046	1e-06	40.7362	0.121059	0.39955	0.0766935	1e-06	36.2543
1.2818	2.99045	2.08401	0.118506	0.313452	0.0896667	0.00140592	29.9519	0.0991644	0.129913	0.0227521	1e-06	9	0.133747	0.430813	0.0849988	1e-06	40.8488	0.12152	0.402605	0.0768783	1e-06	36.3603
1.28296	2.98973	2.08462	0.117627	0.315575	0.0898007	0.00143869	30.0499	0.099318	0.13495	0.0228449	1e-06	9	0.134248	0.432649	0.0851884	1e-06	40.959	0.121985	0.405625	0.0770575	1e-06	36.4638
1.28412	2.98899	2.08525	0.11792	0.319059	0.0899448	0.00146863	30.1497	0.0994775	0.140091	0.0229354	1e-06	9	0.134751	0.434446	0.0853736	1e-06	41.0668	0.122453	0.408607	0.0772311	1e-06	36.5647
1.28528	2.98821	2.08591	0.118506	0.322628	0.0900365	0.00149191	30.2305	0.099643	0.145333	0.0230233	1e-06	9	0.135256	0.436203	0.0855543	1e-06	41.1722	0.122925	0.411553	0.0773991	1e-06	36.663
1.28644	2.98741	2.08659	0.118945	0.325966	0.0900945	0.00151863	30.298	0.0998147	0.150674	0.0231087	1e-06	9	0.135763	0.437922	0.0857307	1e-06	41.2753	0.1234	0.414462	0.0775617	1e-06	36.7587
1.2876	2.98659	2.08729	0.119385	0.329236	0.0901537	0.00156278	30.3621	0.0999926	0.15611	0.0231914	1e-06	9	0.136272	0.439601	0.0859027	1e-06	41.3761	0.123879	0.417333	0.0777188	1e-06	36.8519
1.28876	2.98574	2.08801	0.119824	0.332443	0.0902057	0.00159419	30.4308	0.100177	0.161639	0.0232716	1e-06	9	0.136783	0.441243	0.0860704	1e-06	41.4746	0.12436	0.420166	0.0778706	1e-06	36.9426
1.28992	2.98486	2.08875	0.119971	0.335592	0.0902544	0.00161368	30.5054	0.100368	0.167257	0.023349	1e-06	9	0.137295	0.442847	0.0862339	1e-06	41.5708	0.124846	0.422961	0.0780171	1e-06	37.0307
1.29108	2.98396	2.08952	0.120557	0.339006	0.0903169	0.00164297	30.5851	0.100565	0.172962	0.0234238	1e-06	9	0.13781	0.444414	0.0863932	1e-06	41.6649	0.125334	0.425718	0.0781584	1e-06	37.1165
1.29224	2.98303	2.09031	0.120703	0.342209	0.0903329	0.00166194	30.6501	0.100769	0.17875	0.0234957	1e-06	9	0.138326	0.445944	0.0865484	1e-06	41.7567	0.125826	0.428437	0.0782945	1e-06	37.1997
1.2934	2.98208	2.09111	0.121582	0.345686	0.0903125	0.00167915	30.7008	0.10098	0.184619	0.0235649	1e-06	9	0.138845	0.447438	0.0866995	1e-06	41.8463	0.12632	0.431117	0.0784255	1e-06	37.2806
1.29456	2.9811	2.09195	0.121875	0.348641	0.0902866	0.00171166	30.7471	0.101197	0.190565	0.0236312	1e-06	9	0.139364	0.448896	0.0868466	1e-06	41.9337	0.126818	0.433758	0.0785514	1e-06	37.359
1.29572	2.98009	2.0928	0.122314	0.351717	0.0902784	0.00176727	30.794	0.101422	0.196584	0.0236947	1e-06	9	0.139886	0.450318	0.0869896	1e-06	42.0191	0.127319	0.43636	0.0786724	1e-06	37.4351
1.29688	2.97906	2.09367	0.123193	0.354759	0.0902702	0.00181117	30.848	0.101653	0.202674	0.0237552	1e-06	9	0.140409	0.451705	0.0871288	1e-06	42.1023	0.127823	0.438923	0.0787885	1e-06	37.5088
1.29804	2.97801	2.09457	0.123193	0.357289	0.0902735	0.00186357	30.9063	0.101892	0.208831	0.0238129	1e-06	9	0.140934	0.453057	0.087264	1e-06	42.1834	0.12833	0.441447	0.0788998	1e-06	37.5802
1.2992	2.97692	2.09548	0.123486	0.360273	0.0902418	0.00190361	30.9518	0.102138	0.215052	0.0238675	1e-06	9	0.14146	0.454376	0.0873954	1e-06	42.2625	0.128839	0.443932	0.0790063	1e-06	37.6493
1.30036	2.97582	2.09642	0.123779	0.363394	0.0901635	0.00193987	30.9781	0.102391	0.221333	0.0239193	1e-06	9	0.141988	0.45566	0.087523	1e-06	42.3396	0.129352	0.446377	0.079108	1e-06	37.7161
1.30152	2.97469	2.09738	0.124365	0.366655	0.0900734	0.001991	30.9953	0.102651	0.227671	0.023968	1e-06	9	0.142517	0.45691	0.0876468	1e-06	42.4146	0.129868	0.448783	0.0792051	1e-06	37.7807
1.30268	2.97353	2.09836	0.124805	0.369741	0.089993	0.00206324	31.0126	0.102919	0.234064	0.0240137	1e-06	9	0.143048	0.458128	0.0877669	1e-06	42.4877	0.130386	0.45115	0.0792977	1e-06	37.843
1.30384	2.97235	2.09937	0.124658	0.372815	0.0899059	0.00212338	31.0345	0.103194	0.240506	0.0240564	1e-06	9	0.14358	0.459313	0.0878834	1e-06	42.5588	0.130907	0.453477	0.0793857	1e-06	37.9031
1.305	2.97114	2.10039	0.125391	0.376523	0.0898237	0.00218932	31.0595	0.103477	0.246995	0.0240961	1e-06	9	0.144114	0.460465	0.0879962	1e-06	42.6279	0.131431	0.455764	0.0794693	1e-06	37.9611
1.30616	2.96991	2.10143	0.125537	0.379907	0.0897214	0.00224098	31.0874	0.103768	0.253528	0.0241327	1e-06	9	0.144648	0.461586	0.0881055	1e-06	42.6951	0.131957	0.458012	0.0795485	1e-06	38.0169
1.30732	2.96865	2.1025	0.127148	0.383613	0.0895696	0.00228543	31.0991	0.104065	0.2601	0.0241663	1e-06	9	0.145185	0.462674	0.0882112	1e-06	42.7605	0.132486	0.460221	0.0796233	1e-06	38.0705
1.30848	2.96737	2.10359	0.127002	0.386042	0.089402	0.00234129	31.1056	0.104371	0.266709	0.0241969	1e-06	9	0.145722	0.463732	0.0883134	1e-06	42.8239	0.133018	0.46239	0.0796939	1e-06	38.1221
1.30964	2.96606	2.1047	0.126855	0.389122	0.089241	0.00241795	31.1064	0.104684	0.273351	0.0242244	1e-06	9	0.14626	0.464759	0.0884121	1e-06	42.8855	0.133552	0.46452	0.0797603	1e-06	38.1716
1.3108	2.96473	2.10583	0.128174	0.392857	0.0890732	0.00248373	31.112	0.105005	0.280023	0.0242489	1e-06	9	0.1468	0.465755	0.0885075	1e-06	42.9453	0.134088	0.46661	0.0798226	1e-06	38.219
1.31196	2.96338	2.10698	0.128613	0.395647	0.0889022	0.00253872	31.1284	0.105334	0.286721	0.0242704	1e-06	9	0.147341	0.466721	0.0885994	1e-06	43.0033	0.134627	0.468661	0.0798808	1e-06	38.2644
1.31312	2.96199	2.10815	0.129053	0.398459	0.088717	0.00257678	31.1469	0.10567	0.293441	0.0242889	1e-06	9	0.147883	0.467658	0.0886881	1e-06	43.0595	0.135168	0.470673	0.079935	1e-06	38.3078
1.31428	2.96059	2.10934	0.129639	0.401295	0.0884894	0.00260495	31.1514	0.106015	0.300181	0.0243043	1e-06	9	0.148426	0.468565	0.0887734	1e-06	43.1139	0.135712	0.472646	0.0799852	1e-06	38.3493
1.31544	2.95916	2.11055	0.130225	0.404	0.0882346	0.00263952	31.1427	0.106367	0.306936	0.0243168	1e-06	9	0.14897	0.469443	0.0888555	1e-06	43.1666	0.136258	0.47458	0.0800316	1e-06	38.3887
1.3166	2.95771	2.11178	0.130664	0.406576	0.0879795	0.00269293	31.1283	0.106727	0.313704	0.0243263	1e-06	9	0.149515	0.470292	0.0889343	1e-06	43.2175	0.136806	0.476475	0.0800741	1e-06	38.4263
1.31776	2.95623	2.11304	0.132129	0.409188	0.0877439	0.00277146	31.1148	0.107095	0.320482	0.0243329	1e-06	9	0.150061	0.471113	0.08901	1e-06	43.2668	0.137357	0.478331	0.0801129	1e-06	38.4619
1.31892	2.95473	2.11431	0.131543	0.410716	0.0875065	0.00284034	31.1064	0.10747	0.327265	0.0243365	1e-06	9	0.150608	0.471905	0.0890825	1e-06	43.3143	0.137909	0.480149	0.080148	1e-06	38.4957
1.32008	2.9532	2.11561	0.131982	0.413406	0.0872554	0.0028919	31.0941	0.107854	0.33405	0.0243373	1e-06	9	0.151156	0.47267	0.0891519	1e-06	43.3602	0.138464	0.481929	0.0801794	1e-06	38.5276
1.32124	2.95165	2.11692	0.132422	0.416141	0.0869811	0.00293241	31.0778	0.108245	0.340835	0.0243351	1e-06	9	0.151705	0.473408	0.0892182	1e-06	43.4045	0.139021	0.48367	0.0802072	1e-06	38.5577
1.3224	2.95007	2.11826	0.133008	0.418923	0.0866668	0.0029751	31.0442	0.108645	0.347616	0.0243302	1e-06	9	0.152254	0.474118	0.0892814	1e-06	43.4471	0.13958	0.485373	0.0802315	1e-06	38.586
1.32356	2.94847	2.11961	0.133447	0.421595	0.0863432	0.00303318	31.0035	0.109052	0.354389	0.0243224	1e-06	9	0.152804	0.474802	0.0893417	1e-06	43.4881	0.14014	0.487037	0.0802523	1e-06	38.6125
1.32472	2.94685	2.12099	0.13418	0.424322	0.0860339	0.00311526	30.9631	0.109467	0.361152	0.0243118	1e-06	9	0.153356	0.475459	0.089399	1e-06	43.5275	0.140703	0.488665	0.0802697	1e-06	38.6373
1.32588	2.94521	2.12239	0.135645	0.426786	0.0857152	0.00318735	30.9261	0.10989	0.367901	0.0242985	1e-06	9	0.153908	0.47609	0.0894533	1e-06	43.5654	0.141268	0.490254	0.0802838	1e-06	38.6603
1.32704	2.94354	2.1238	0.135205	0.428188	0.085393	0.00324953	30.8937	0.11032	0.374634	0.0242825	1e-06	9	0.15446	0.476695	0.0895047	1e-06	43.6017	0.141834	0.491807	0.0802945	1e-06	38.6816
1.3282	2.94184	2.12524	0.135645	0.430615	0.0850544	0.0032957	30.8561	0.110759	0.381347	0.0242638	1e-06	9	0.155013	0.477274	0.0895533	1e-06	43.6364	0.142402	0.493322	0.080302	1e-06	38.7012
1.32936	2.94013	2.12669	0.136523	0.433108	0.084675	0.0033383	30.8025	0.111205	0.388037	0.0242426	1e-06	9	0.155567	0.477828	0.089599	1e-06	43.6697	0.142972	0.4948	0.0803063	1e-06	38.7192
1.33052	2.93839	2.12817	0.13667	0.435189	0.0842853	0.00339366	30.7416	0.111659	0.394702	0.0242187	1e-06	9	0.156122	0.478357	0.0896419	1e-06	43.7014	0.143544	0.496241	0.0803074	1e-06	38.7355
1.33168	2.93662	2.12967	0.137695	0.437661	0.0839035	0.00347038	30.6766	0.112121	0.401338	0.0241923	1e-06	9	0.156677	0.478861	0.0896819	1e-06	43.7317	0.144118	0.497646	0.0803054	1e-06	38.7502
1.33284	2.93484	2.13118	0.137842	0.439568	0.0835188	0.00353988	30.6167	0.11259	0.407943	0.0241634	1e-06	9	0.157233	0.479341	0.0897193	1e-06	43.7605	0.144693	0.499015	0.0803004	1e-06	38.7633
1.334	2.93303	2.13272	0.138428	0.441872	0.0831325	0.00360225	30.559	0.113067	0.414513	0.0241321	1e-06	9	0.157789	0.479797	0.0897539	1e-06	43.7878	0.145269	0.500348	0.0802923	1e-06	38.7749
1.33516	2.9312	2.13427	0.138721	0.444095	0.0827292	0.00364827	30.5025	0.113552	0.421047	0.0240984	1e-06	9	0.158346	0.480228	0.0897858	1e-06	43.8137	0.145848	0.501644	0.0802814	1e-06	38.7849
1.33632	2.92934	2.13584	0.140186	0.446562	0.0822931	0.00368498	30.4362	0.114044	0.427541	0.0240624	1e-06	9	0.158903	0.480636	0.089815	1e-06	43.8382	0.146427	0.502906	0.0802675	1e-06	38.7934
1.33748	2.92746	2.13744	0.1396	0.447993	0.0818397	0.00373102	30.3618	0.114544	0.433992	0.024024	1e-06	9	0.159461	0.481021	0.0898416	1e-06	43.8613	0.147008	0.504132	0.0802508	1e-06	38.8003
1.33864	2.92556	2.13905	0.140332	0.450634	0.0813919	0.00379728	30.2798	0.115051	0.440399	0.0239835	1e-06	9	0.160019	0.481382	0.0898656	1e-06	43.8829	0.147591	0.505323	0.0802313	1e-06	38.8058
1.3398	2.92364	2.14068	0.140918	0.453045	0.0809644	0.00389006	30.2026	0.115565	0.446758	0.0239407	1e-06	9	0.160578	0.481721	0.089887	1e-06	43.9032	0.148175	0.506479	0.080209	1e-06	38.8098
1.34096	2.92169	2.14233	0.142383	0.45539	0.0805358	0.00397539	30.1323	0.116087	0.453068	0.0238958	1e-06	9	0.161137	0.482036	0.0899058	1e-06	43.9222	0.148761	0.5076	0.080184	1e-06	38.8124
1.34212	2.91972	2.144	0.143555	0.45671	0.0800902	0.00404174	30.0658	0.116616	0.459325	0.0238489	1e-06	9	0.161696	0.48233	0.0899221	1e-06	43.9398	0.149347	0.508688	0.0801563	1e-06	38.8135
1.34328	2.91773	2.14569	0.143408	0.457327	0.0796261	0.0040954	29.9938	0.117153	0.465528	0.0237999	1e-06	9	0.162256	0.482601	0.0899359	1e-06	43.9561	0.149935	0.509741	0.080126	1e-06	38.8133
1.34444	2.91572	2.1474	0.145605	0.458686	0.0791375	0.00415581	29.9014	0.117696	0.471674	0.023749	1e-06	9	0.162816	0.48285	0.0899472	1e-06	43.971	0.150524	0.510761	0.0800932	1e-06	38.8116
1.3456	2.91369	2.14912	0.143994	0.458222	0.0786518	0.00423389	29.8021	0.118247	0.477761	0.0236961	1e-06	9	0.163376	0.483077	0.089956	1e-06	43.9846	0.151115	0.511747	0.0800578	1e-06	38.8087
1.34676	2.91163	2.15087	0.14458	0.460103	0.0781845	0.00433826	29.6893	0.118805	0.483787	0.0236414	1e-06	9	0.163937	0.483283	0.0899624	1e-06	43.997	0.151706	0.5127	0.0800199	1e-06	38.8043
1.34792	2.90955	2.15263	0.14502	0.461926	0.0777111	0.00443498	29.5792	0.119369	0.489749	0.0235849	1e-06	9	0.164497	0.483468	0.0899664	1e-06	44.0081	0.152299	0.51362	0.0799795	1e-06	38.7986
1.34908	2.90745	2.15441	0.145752	0.463856	0.0772054	0.00449858	29.4694	0.119941	0.495647	0.0235266	1e-06	9	0.165058	0.483632	0.089968	1e-06	44.0179	0.152893	0.514508	0.0799367	1e-06	38.7917
1.35024	2.90533	2.15621	0.146338	0.465572	0.0766853	0.00454929	29.3611	0.120519	0.501477	0.0234667	1e-06	9	0.165619	0.483774	0.0899672	1e-06	44.0265	0.153487	0.515363	0.0798916	1e-06	38.7834
1.3514	2.90318	2.15803	0.146924	0.467239	0.0761471	0.00460268	29.245	0.121104	0.507238	0.0234051	1e-06	9	0.166181	0.483896	0.0899641	1e-06	44.0338	0.154083	0.516187	0.0798441	1e-06	38.7739
1.35256	2.90102	2.15986	0.147363	0.468857	0.0756049	0.00466967	29.1235	0.121696	0.512928	0.0233419	1e-06	9	0.166742	0.483998	0.0899586	1e-06	44.0399	0.15468	0.516978	0.0797943	1e-06	38.7631
1.35372	2.89883	2.16172	0.148096	0.47059	0.0750764	0.00476117	29.0007	0.122294	0.518546	0.0232773	1e-06	9	0.167303	0.484079	0.0899509	1e-06	44.0448	0.155278	0.517738	0.0797423	1e-06	38.7511
1.35488	2.89663	2.16359	0.148682	0.472118	0.0745774	0.00485872	28.8928	0.122899	0.524089	0.0232111	1e-06	9	0.167865	0.484141	0.0899409	1e-06	44.0484	0.155876	0.518467	0.079688	1e-06	38.7379
1.35604	2.8944	2.16548	0.149414	0.473605	0.0740545	0.0049237	28.7886	0.12351	0.529556	0.0231436	1e-06	9	0.168427	0.484182	0.0899286	1e-06	44.0509	0.156476	0.519166	0.0796315	1e-06	38.7235
1.3572	2.89215	2.16739	0.149707	0.474891	0.073514	0.00497246	28.6844	0.124128	0.534946	0.0230747	1e-06	9	0.168988	0.484204	0.0899141	1e-06	44.0523	0.157076	0.519833	0.0795729	1e-06	38.7079
1.35836	2.88988	2.16931	0.150439	0.47646	0.0729645	0.00501978	28.5774	0.124751	0.540256	0.0230044	1e-06	9	0.16955	0.484207	0.0898974	1e-06	44.0524	0.157677	0.52047	0.0795122	1e-06	38.6911
1.35952	2.88759	2.17126	0.150293	0.477832	0.0724062	0.00507735	28.4647	0.125381	0.545486	0.022933	1e-06	9	0.170112	0.48419	0.0898784	1e-06	44.0514	0.158279	0.521078	0.0794494	1e-06	38.6732
1.36068	2.88528	2.17322	0.151611	0.479971	0.0718591	0.00515453	28.3514	0.126017	0.550634	0.0228603	1e-06	9	0.170673	0.484154	0.0898574	1e-06	44.0492	0.158881	0.521655	0.0793845	1e-06	38.6541
1.36184	2.88294	2.1752	0.152197	0.481276	0.0713367	0.00526073	28.245	0.126658	0.555699	0.0227865	1e-06	9	0.171235	0.484099	0.0898341	1e-06	44.046	0.159484	0.522203	0.0793176	1e-06	38.634
1.363	2.88059	2.17719	0.152783	0.482551	0.0708117	0.00536044	28.1421	0.127306	0.56068	0.0227117	1e-06	9	0.171796	0.484026	0.0898087	1e-06	44.0415	0.160088	0.522722	0.0792487	1e-06	38.6127
1.36416	2.87822	2.1792	0.152344	0.483797	0.0702659	0.00544138	28.0388	0.127959	0.565574	0.0226357	1e-06	9	0.172358	0.483934	0.0897812	1e-06	44.036	0.160693	0.523213	0.0791779	1e-06	38.5904
1.36532	2.87583	2.18123	0.153955	0.486139	0.0697054	0.0055114	27.935	0.128618	0.570382	0.0225588	1e-06	9	0.172919	0.483823	0.0897516	1e-06	44.0294	0.161298	0.523674	0.0791051	1e-06	38.567
1.36648	2.87342	2.18328	0.154834	0.487334	0.0691389	0.0055892	27.834	0.129282	0.575102	0.022481	1e-06	9	0.17348	0.483695	0.0897199	1e-06	44.0217	0.161903	0.524108	0.0790304	1e-06	38.5425
1.36764	2.87098	2.18534	0.155566	0.488186	0.0685818	0.00568339	27.7334	0.129952	0.579732	0.0224022	1e-06	9	0.174041	0.483548	0.0896862	1e-06	44.0129	0.162509	0.524513	0.0789539	1e-06	38.517
1.3688	2.86853	2.18742	0.156006	0.488856	0.0680475	0.00580494	27.6331	0.130627	0.584273	0.0223226	1e-06	9	0.174602	0.483384	0.0896504	1e-06	44.003	0.163116	0.524891	0.0788755	1e-06	38.4904
1.36996	2.86606	2.18952	0.156592	0.489666	0.0675105	0.00592146	27.5334	0.131308	0.588723	0.0222423	1e-06	9	0.175163	0.483201	0.0896126	1e-06	43.9921	0.163723	0.525242	0.0787953	1e-06	38.4629
1.37112	2.86357	2.19163	0.157471	0.490456	0.0669413	0.00601296	27.4292	0.131993	0.593081	0.0221611	1e-06	9	0.175723	0.483002	0.0895727	1e-06	43.9801	0.16433	0.525565	0.0787133	1e-06	38.4343
1.37228	2.86106	2.19376	0.158057	0.490908	0.0663572	0.0060935	27.3231	0.132684	0.597346	0.0220793	1e-06	9	0.176283	0.482784	0.0895309	1e-06	43.9671	0.164938	0.525862	0.0786296	1e-06	38.4048
1.37344	2.85853	2.1959	0.159082	0.491341	0.0657728	0.00618099	27.2133	0.133379	0.601518	0.0219968	1e-06	9	0.176843	0.48255	0.0894871	1e-06	43.953	0.165546	0.526132	0.0785441	1e-06	38.3743
1.3746	2.85598	2.19806	0.159082	0.491275	0.0652038	0.00628641	27.103	0.134079	0.605596	0.0219137	1e-06	9	0.177403	0.482299	0.0894414	1e-06	43.9379	0.166155	0.526376	0.0784569	1e-06	38.3428
1.37576	2.85341	2.20024	0.159814	0.491833	0.0646562	0.00641762	26.9894	0.134784	0.609579	0.02183	1e-06	9	0.177962	0.48203	0.0893936	1e-06	43.9218	0.166764	0.526593	0.0783681	1e-06	38.3104
1.37692	2.85083	2.20244	0.1604	0.492215	0.0641078	0.00654459	26.8778	0.135493	0.613467	0.0217458	1e-06	9	0.178521	0.481745	0.089344	1e-06	43.9047	0.167373	0.526786	0.0782776	1e-06	38.2771
1.37808	2.84822	2.20464	0.16084	0.492579	0.0635285	0.00663957	26.7641	0.136207	0.617258	0.0216611	1e-06	9	0.17908	0.481443	0.0892925	1e-06	43.8866	0.167982	0.526952	0.0781854	1e-06	38.2428
1.37924	2.8456	2.20687	0.162012	0.493088	0.0629337	0.00671974	26.649	0.136925	0.620953	0.021576	1e-06	9	0.179638	0.481125	0.089239	1e-06	43.8675	0.168592	0.527094	0.0780916	1e-06	38.2077
1.3804	2.84296	2.20911	0.161865	0.492941	0.0623389	0.00680146	26.5345	0.137648	0.624551	0.0214904	1e-06	9	0.180196	0.48079	0.0891837	1e-06	43.8474	0.169201	0.527211	0.0779963	1e-06	38.1716
1.38156	2.8403	2.21137	0.162744	0.49358	0.0617543	0.00689647	26.417	0.138374	0.628052	0.0214044	1e-06	9	0.180753	0.480439	0.0891265	1e-06	43.8263	0.169811	0.527303	0.0778994	1e-06	38.1347
1.38272	2.83762	2.21364	0.162744	0.493883	0.0611931	0.00701573	26.3036	0.139105	0.631454	0.0213182	1e-06	9	0.181311	0.480072	0.0890674	1e-06	43.8043	0.170421	0.527371	0.0778009	1e-06	38.0968
1.38388	2.83493	2.21592	0.164355	0.494814	0.0606607	0.00716636	26.1921	0.139839	0.634759	0.0212316	1e-06	9	0.181867	0.479689	0.0890065	1e-06	43.7813	0.171031	0.527415	0.0777009	1e-06	38.0581
1.38504	2.83221	2.21822	0.164941	0.494609	0.0600946	0.0072827	26.083	0.140577	0.637965	0.0211447	1e-06	9	0.182423	0.47929	0.0889438	1e-06	43.7574	0.171641	0.527435	0.0775994	1e-06	38.0186
1.3862	2.82948	2.22054	0.165527	0.494391	0.0595109	0.00738194	25.9706	0.141319	0.641071	0.0210576	1e-06	9	0.182979	0.478875	0.0888792	1e-06	43.7325	0.172252	0.527432	0.0774965	1e-06	37.9782
1.38736	2.82673	2.22287	0.166113	0.494159	0.0589284	0.00748203	25.8569	0.142065	0.644079	0.0209703	1e-06	9	0.183534	0.478445	0.0888129	1e-06	43.7067	0.172862	0.527405	0.077392	1e-06	37.937
1.38852	2.82397	2.22522	0.166553	0.493913	0.0583555	0.00759085	25.743	0.142813	0.646988	0.0208829	1e-06	9	0.184089	0.477999	0.0887448	1e-06	43.68	0.173472	0.527356	0.0772862	1e-06	37.895
1.38968	2.82119	2.22758	0.167285	0.493813	0.0578049	0.00771937	25.6307	0.143566	0.649797	0.0207953	1e-06	9	0.184643	0.477538	0.0886749	1e-06	43.6523	0.174082	0.527284	0.0771789	1e-06	37.8522
1.39084	2.81839	2.22995	0.168018	0.493539	0.0572857	0.00787861	25.5211	0.144321	0.652506	0.0207076	1e-06	9	0.185197	0.477062	0.0886032	1e-06	43.6237	0.174692	0.527189	0.0770701	1e-06	37.8086
1.392	2.81557	2.23234	0.168604	0.49309	0.0567339	0.00800523	25.4081	0.145079	0.655115	0.0206198	1e-06	9	0.18575	0.476571	0.0885298	1e-06	43.5942	0.175302	0.527072	0.0769601	1e-06	37.7641
1.39316	2.81273	2.23475	0.169043	0.492625	0.0561487	0.00810019	25.2903	0.145841	0.657625	0.0205319	1e-06	9	0.186303	0.476064	0.0884547	1e-06	43.5639	0.175912	0.526933	0.0768486	1e-06	37.7189
1.39432	2.80988	2.23716	0.169922	0.492305	0.0555612	0.00819302	25.1707	0.146605	0.660035	0.0204441	1e-06	9	0.186855	0.475543	0.0883779	1e-06	43.5326	0.176521	0.526772	0.0767358	1e-06	37.673
1.39548	2.80702	2.23959	0.170361	0.491648	0.0549829	0.00829238	25.0527	0.147372	0.662345	0.0203562	1e-06	9	0.187406	0.475007	0.0882993	1e-06	43.5004	0.177131	0.52659	0.0766216	1e-06	37.6263
1.39664	2.80413	2.24204	0.169922	0.491135	0.0544241	0.00840847	24.9352	0.148142	0.664555	0.0202683	1e-06	9	0.187957	0.474457	0.088219	1e-06	43.4674	0.17774	0.526343	0.076053	1e-06	37.4007
1.3978	2.80124	2.2445	0.172119	0.491725	0.053894	0.00855228	24.8196	0.148914	0.666665	0.0201805	1e-06	9	0.188507	0.473891	0.0881371	1e-06	43.4335	0.178349	0.525953	0.0753598	1e-06	37.1246
1.39896	2.79832	2.24697	0.171533	0.490535	0.0533479	0.0086713	24.7122	0.149688	0.668675	0.0200928	1e-06	9	0.189056	0.473312	0.0880535	1e-06	43.3987	0.178957	0.525418	0.0746725	1e-06	36.8494
1.40012	2.79539	2.24946	0.172852	0.49061	0.0527688	0.00875872	24.5972	0.150465	0.670586	0.0200052	1e-06	9	0.189605	0.472718	0.0879682	1e-06	43.3631	0.179565	0.524742	0.0739912	1e-06	36.5749
1.40128	2.79244	2.25196	0.173584	0.489864	0.0521792	0.00883943	24.4831	0.151244	0.672397	0.0199176	1e-06	9	0.190153	0.47211	0.0878813	1e-06	43.3266	0.180172	0.523931	0.0733159	1e-06	36.3013
1.40244	2.78948	2.25447	0.17417	0.488938	0.0515953	0.00892285	24.3696	0.152025	0.674109	0.0198302	1e-06	9	0.1907	0.471488	0.0877927	1e-06	43.2893	0.180778	0.52299	0.0726466	1e-06	36.0286
1.4036	2.7865	2.25699	0.174756	0.487992	0.0510297	0.00901913	24.2575	0.152808	0.675721	0.019743	1e-06	9	0.191247	0.470851	0.0877025	1e-06	43.2511	0.181383	0.521923	0.0719833	1e-06	35.7569
1.40476	2.78351	2.25953	0.175342	0.487025	0.0504908	0.00914004	24.1465	0.153593	0.677235	0.0196559	1e-06	9	0.191792	0.470201	0.0876107	1e-06	43.2121	0.181986	0.520734	0.071326	1e-06	35.4861
1.40592	2.7805	2.26208	0.17666	0.486034	0.0499843	0.00929348	24.036	0.154379	0.678649	0.0195691	1e-06	9	0.192337	0.469537	0.0875173	1e-06	43.1722	0.182588	0.519429	0.0706746	1e-06	35.2165
1.40708	2.77748	2.26465	0.176367	0.484218	0.0494451	0.00941687	23.9203	0.155167	0.679965	0.0194824	1e-06	9	0.192882	0.468859	0.0874223	1e-06	43.1316	0.183189	0.51801	0.0700293	1e-06	34.9479
1.40824	2.77444	2.26722	0.1771	0.483337	0.0488843	0.00952277	23.7946	0.155956	0.681183	0.019396	1e-06	9	0.193425	0.468168	0.0873257	1e-06	43.0901	0.183787	0.516484	0.0693899	1e-06	34.6805
1.4094	2.77139	2.26981	0.177979	0.482267	0.0483265	0.00962913	23.6698	0.156747	0.682302	0.0193098	1e-06	9	0.193968	0.467279	0.0868509	1e-06	43.0368	0.184384	0.514852	0.0687564	1e-06	34.4143
1.41056	2.76832	2.27241	0.178418	0.480849	0.0477867	0.00974695	23.5475	0.157539	0.683324	0.0192239	1e-06	9	0.194509	0.465925	0.0862724	1e-06	42.9555	0.184979	0.51312	0.0681288	1e-06	34.1492
1.41172	2.76524	2.27503	0.177979	0.47956	0.0472735	0.00988876	23.4251	0.158333	0.684248	0.0191382	1e-06	9	0.195049	0.464136	0.0856989	1e-06	42.8481	0.185572	0.511292	0.0675071	1e-06	33.8854
1.41288	2.76215	2.27765	0.17959	0.47936	0.0467923	0.010064	23.3024	0.159127	0.685074	0.0190529	1e-06	9	0.195586	0.461973	0.0851305	1e-06	42.7184	0.186163	0.509371	0.0668912	1e-06	33.6229
1.41404	2.75904	2.28029	0.179297	0.478006	0.0462792	0.0102087	23.1811	0.159922	0.685804	0.0189678	1e-06	9	0.19612	0.459491	0.0845675	1e-06	42.5694	0.186752	0.50736	0.0662811	1e-06	33.3616
1.4152	2.75592	2.28294	0.180908	0.477579	0.0457333	0.0103237	23.0537	0.160718	0.686438	0.0188831	1e-06	9	0.196652	0.456737	0.0840099	1e-06	42.4042	0.187338	0.505264	0.0656767	1e-06	33.1017
1.41636	2.75278	2.2856	0.180762	0.475995	0.0451873	0.0104364	22.9309	0.161514	0.686975	0.0187986	1e-06	9	0.19718	0.453752	0.0834579	1e-06	42.2251	0.187922	0.503086	0.0650781	1e-06	32.8431
1.41752	2.74963	2.28827	0.181494	0.475175	0.0446522	0.0105568	22.807	0.162312	0.687417	0.0187145	1e-06	9	0.197704	0.450572	0.0829114	1e-06	42.0343	0.188503	0.500828	0.0644851	1e-06	32.5859
1.41868	2.74647	2.29095	0.18252	0.474158	0.0441405	0.0107	22.6871	0.163109	0.687763	0.0186308	1e-06	9	0.198225	0.447228	0.0823707	1e-06	41.8337	0.189082	0.498495	0.0638978	1e-06	32.33
1.41984	2.7433	2.29364	0.182959	0.47262	0.0436607	0.0108761	22.57	0.163907	0.688014	0.0185474	1e-06	9	0.198742	0.443748	0.0818356	1e-06	41.6249	0.189658	0.49609	0.063316	1e-06	32.0755
1.421	2.74011	2.29635	0.183545	0.471201	0.043155	0.0110249	22.4493	0.164705	0.68817	0.0184644	1e-06	9	0.199255	0.440156	0.0813061	1e-06	41.4093	0.190231	0.493615	0.0627397	1e-06	31.8224
1.42216	2.73691	2.29906	0.184131	0.469739	0.0426173	0.0111444	22.3238	0.165504	0.688233	0.0183818	1e-06	9	0.199763	0.436471	0.0807822	1e-06	41.1883	0.190801	0.491073	0.062169	1e-06	31.5707
1.42332	2.73369	2.30179	0.18457	0.468232	0.0420771	0.0112601	22.1975	0.166302	0.688202	0.0182995	1e-06	9	0.200267	0.432712	0.080264	1e-06	40.9627	0.191368	0.488468	0.0616036	1e-06	31.3205
1.42448	2.73047	2.30452	0.185303	0.466838	0.0415469	0.0113786	22.0737	0.1671	0.688077	0.0182177	1e-06	9	0.200767	0.428895	0.0797512	1e-06	40.7337	0.191932	0.485803	0.0610436	1e-06	31.0716
1.42564	2.72723	2.30727	0.185742	0.465236	0.0410369	0.0115115	21.9537	0.167898	0.687859	0.0181362	1e-06	9	0.201262	0.425033	0.079244	1e-06	40.502	0.192493	0.483079	0.0604888	1e-06	30.8242
1.4268	2.72398	2.31003	0.186328	0.463743	0.0405565	0.0116729	21.835	0.168696	0.68755	0.0180551	1e-06	9	0.201753	0.421137	0.0787422	1e-06	40.2682	0.193051	0.4803	0.0599393	1e-06	30.5783
1.42796	2.72071	2.3128	0.187061	0.462198	0.0400802	0.0118407	21.7155	0.169493	0.687148	0.0179745	1e-06	9	0.202239	0.417218	0.0782457	1e-06	40.0331	0.193606	0.477469	0.059395	1e-06	30.3338
1.42912	2.71744	2.31557	0.1875	0.460438	0.039572	0.0119801	21.5913	0.17029	0.686655	0.0178943	1e-06	9	0.202721	0.413284	0.0777545	1e-06	39.797	0.194157	0.474587	0.0588559	1e-06	30.0908
1.43028	2.71415	2.31836	0.187939	0.458782	0.039052	0.0121106	21.4635	0.171086	0.686071	0.0178145	1e-06	9	0.203198	0.409343	0.0772685	1e-06	39.5606	0.194705	0.471657	0.0583218	1e-06	29.8492
1.43144	2.71086	2.32116	0.188672	0.457227	0.0385381	0.0122419	21.3377	0.171882	0.685396	0.0177351	1e-06	9	0.203671	0.405401	0.0767877	1e-06	39.324	0.19525	0.468681	0.0577927	1e-06	29.6091
1.4326	2.70755	2.32396	0.189404	0.455451	0.0380437	0.0123855	21.2165	0.172676	0.684631	0.0176562	1e-06	9	0.204139	0.401463	0.0763118	1e-06	39.0878	0.195791	0.465663	0.0572685	1e-06	29.3704
1.43376	2.70423	2.32678	0.189844	0.453451	0.0375751	0.012555	21.0963	0.17347	0.683777	0.0175778	1e-06	9	0.204602	0.397535	0.0758409	1e-06	38.8521	0.196329	0.462603	0.0567492	1e-06	29.1332
1.43492	2.7009	2.3296	0.18999	0.451547	0.0371294	0.0127389	20.9794	0.174263	0.682834	0.0174997	1e-06	9	0.205061	0.393621	0.0753749	1e-06	38.6173	0.196863	0.459504	0.0562347	1e-06	28.8975
1.43608	2.69756	2.33244	0.190869	0.450055	0.0366541	0.0128947	20.8581	0.175054	0.681803	0.0174221	1e-06	9	0.205515	0.389723	0.0749137	1e-06	38.3834	0.197394	0.456368	0.055725	1e-06	28.6632
1.43724	2.69421	2.33528	0.191748	0.448173	0.0361549	0.0130305	20.7348	0.175845	0.680684	0.017345	1e-06	9	0.205965	0.385845	0.0744572	1e-06	38.1507	0.197921	0.453198	0.05522	1e-06	28.4304
1.4384	2.69085	2.33813	0.192041	0.445897	0.0356604	0.0131658	20.6133	0.176633	0.679477	0.0172684	1e-06	9	0.20641	0.381989	0.0740053	1e-06	37.9193	0.198444	0.449994	0.0547196	1e-06	28.199
1.43956	2.68747	2.34099	0.192627	0.443868	0.0351848	0.0133132	20.4933	0.177421	0.678183	0.0171921	1e-06	9	0.206851	0.378156	0.0735579	1e-06	37.6894	0.198963	0.44676	0.0542238	1e-06	27.9691
1.44072	2.68409	2.34386	0.193213	0.44176	0.0347353	0.013486	20.3744	0.178207	0.676803	0.0171164	1e-06	9	0.207288	0.37435	0.073115	1e-06	37.461	0.199479	0.443496	0.0537325	1e-06	27.7406
1.44188	2.6807	2.34673	0.193652	0.439572	0.0342911	0.0136659	20.2538	0.178991	0.675337	0.0170411	1e-06	9	0.20772	0.37057	0.0726765	1e-06	37.2342	0.199991	0.440204	0.0532457	1e-06	27.5136
1.44304	2.6773	2.34962	0.194092	0.437462	0.0338176	0.0138197	20.1279	0.179774	0.673786	0.0169663	1e-06	9	0.208147	0.366819	0.0722422	1e-06	37.0091	0.200499	0.436887	0.0527632	1e-06	27.288
1.4442	2.67389	2.35251	0.194824	0.435425	0.0333273	0.0139554	20.0003	0.180554	0.67215	0.016892	1e-06	9	0.208571	0.363096	0.0718121	1e-06	36.7858	0.201003	0.433545	0.052285	1e-06	27.0638
1.44536	2.67047	2.35541	0.194971	0.43314	0.0328391	0.0140871	19.875	0.181333	0.67043	0.0168181	1e-06	9	0.20899	0.359403	0.0713862	1e-06	36.5642	0.201504	0.43018	0.0518111	1e-06	26.8411
1.44652	2.66704	2.35832	0.19585	0.431244	0.0323638	0.0142259	19.7515	0.18211	0.668626	0.0167447	1e-06	9	0.209405	0.35574	0.0709643	1e-06	36.3444	0.202	0.426795	0.0513414	1e-06	26.6197
1.44768	2.6636	2.36123	0.196582	0.428934	0.0319141	0.0143865	19.6325	0.182884	0.666739	0.0166717	1e-06	9	0.209815	0.352108	0.0705464	1e-06	36.1265	0.202493	0.42339	0.0508759	1e-06	26.3998
1.44884	2.66016	2.36416	0.197168	0.426367	0.0314647	0.0145523	19.5101	0.183656	0.664769	0.0165993	1e-06	9	0.210221	0.348506	0.0701324	1e-06	35.9104	0.202982	0.419966	0.0504144	1e-06	26.1813
1.45	2.6567	2.36709	0.197607	0.4237	0.030983	0.0146893	19.3812	0.184426	0.662717	0.0165273	1e-06	9	0.210624	0.344935	0.0697222	1e-06	35.6961	0.203467	0.416526	0.0499569	1e-06	25.9641
1.45116	2.65324	2.37003	0.197607	0.42109	0.0304888	0.0148093	19.2501	0.185194	0.660584	0.0164558	1e-06	9	0.211022	0.341395	0.0693158	1e-06	35.4837	0.203947	0.41307	0.0495034	1e-06	25.7483
1.45232	2.64977	2.37297	0.198926	0.419015	0.0300077	0.0149342	19.1208	0.185959	0.65837	0.0163848	1e-06	9	0.211416	0.337885	0.0689131	1e-06	35.2731	0.204424	0.409599	0.0490538	1e-06	25.5339
1.45348	2.64629	2.37592	0.199365	0.416029	0.02955	0.0150811	18.9949	0.186721	0.656075	0.0163142	1e-06	9	0.211806	0.334406	0.068514	1e-06	35.0644	0.204897	0.406116	0.0486081	1e-06	25.3209
1.45464	2.6428	2.37888	0.199805	0.413089	0.029122	0.0152518	18.8693	0.187481	0.6537	0.0162441	1e-06	9	0.212192	0.330958	0.0681184	1e-06	34.8575	0.205365	0.402621	0.0481661	1e-06	25.1092
1.4558	2.63931	2.38184	0.200244	0.410194	0.0286945	0.0154287	18.7376	0.188238	0.651246	0.0161373	1e-06	9	0.212573	0.32754	0.0677263	1e-06	34.6524	0.20583	0.399115	0.0477278	1e-06	24.8989
1.45696	2.63581	2.38481	0.200684	0.407338	0.0282461	0.0155857	18.6003	0.188992	0.648623	0.0159854	1e-06	9	0.212951	0.324151	0.0673376	1e-06	34.4491	0.206291	0.395599	0.0472932	1e-06	24.6898
1.45812	2.6323	2.38779	0.20127	0.404518	0.0277979	0.0157345	18.4635	0.189743	0.645829	0.0158354	1e-06	9	0.213325	0.320793	0.0669523	1e-06	34.2476	0.206747	0.392075	0.0468622	1e-06	24.4822
1.45928	2.62878	2.39077	0.201855	0.401571	0.0273617	0.0158855	18.3291	0.19049	0.642865	0.0156872	1e-06	9	0.213696	0.317463	0.0665703	1e-06	34.0478	0.2072	0.388543	0.0464348	1e-06	24.2758
1.46044	2.62526	2.39376	0.201709	0.398492	0.0269471	0.0160521	18.1956	0.191234	0.639734	0.0155407	1e-06	9	0.214062	0.314163	0.0661915	1e-06	33.8498	0.207648	0.385005	0.0460108	1e-06	24.0707
1.4616	2.62173	2.39675	0.202734	0.39608	0.0265589	0.016249	18.0587	0.191974	0.636437	0.015396	1e-06	9	0.214425	0.310891	0.0658159	1e-06	33.6535	0.208092	0.381461	0.0455903	1e-06	23.8669
1.46276	2.61819	2.39975	0.203467	0.393048	0.0261711	0.0164527	17.9197	0.19271	0.632977	0.0152531	1e-06	9	0.214783	0.307648	0.0654434	1e-06	33.4589	0.208533	0.377912	0.0451732	1e-06	23.6643
1.46392	2.61465	2.40276	0.20376	0.389713	0.0257491	0.0166331	17.7702	0.193443	0.629356	0.0151119	1e-06	9	0.215138	0.304432	0.065074	1e-06	33.2659	0.208969	0.374359	0.0447594	1e-06	23.4631
1.46508	2.6111	2.40577	0.202881	0.386553	0.0253156	0.0167919	17.6192	0.19417	0.625574	0.0149725	1e-06	9	0.21549	0.301244	0.0647076	1e-06	33.0747	0.209401	0.370803	0.0443489	1e-06	23.2631
1.46624	2.60755	2.40878	0.204492	0.384845	0.0248917	0.0169504	17.4693	0.194894	0.621636	0.0148348	1e-06	9	0.215837	0.298083	0.0643441	1e-06	32.885	0.209828	0.367246	0.0439417	1e-06	23.0643
1.4674	2.60399	2.4118	0.205957	0.381862	0.0244886	0.0171227	17.3293	0.195613	0.617541	0.0146987	1e-06	9	0.216181	0.294949	0.0639836	1e-06	32.6969	0.210252	0.363686	0.0435376	1e-06	22.8668
1.46856	2.60042	2.41482	0.206396	0.377761	0.0241119	0.0173237	17.1881	0.196326	0.613293	0.0145644	1e-06	9	0.216521	0.29184	0.0636259	1e-06	32.5104	0.210672	0.360126	0.0431366	1e-06	22.6704
1.46972	2.59685	2.41785	0.205957	0.373659	0.0237355	0.0175312	17.0356	0.197035	0.608894	0.0144317	1e-06	9	0.216858	0.288758	0.063271	1e-06	32.3255	0.211087	0.356566	0.0427387	1e-06	22.4753
1.47088	2.59328	2.42089	0.206104	0.370512	0.0233358	0.0177191	16.871	0.197739	0.604344	0.0143007	1e-06	9	0.217191	0.285701	0.0629188	1e-06	32.1421	0.211499	0.353007	0.0423439	1e-06	22.2814
1.47204	2.5897	2.42392	0.206982	0.367674	0.0229254	0.0178861	16.707	0.198437	0.599647	0.0141714	1e-06	9	0.217521	0.282669	0.0625694	1e-06	31.9601	0.211906	0.349449	0.041952	1e-06	22.0887
1.4732	2.58611	2.42696	0.207275	0.364342	0.022524	0.0180502	16.5478	0.19913	0.594803	0.0140436	1e-06	9	0.217847	0.279662	0.0622226	1e-06	31.7797	0.212309	0.345893	0.041563	1e-06	21.8971
1.47436	2.58252	2.43001	0.207715	0.361152	0.0221411	0.0182248	16.3897	0.199817	0.589815	0.0139175	1e-06	9	0.21817	0.276678	0.0618784	1e-06	31.6007	0.212708	0.34234	0.0411769	1e-06	21.7067
1.47552	2.57892	2.43306	0.208447	0.357939	0.0217839	0.0184265	16.2304	0.200498	0.584684	0.013793	1e-06	9	0.218489	0.273719	0.0615368	1e-06	31.4231	0.213103	0.33879	0.0407937	1e-06	21.5174
1.47668	2.57533	2.43611	0.20874	0.354379	0.0214218	0.0186298	16.0654	0.201174	0.579413	0.01367	1e-06	9	0.218805	0.270783	0.0611977	1e-06	31.247	0.213494	0.335243	0.0404132	1e-06	21.3292
1.47784	2.57172	2.43917	0.209033	0.350949	0.0210544	0.0188166	15.9	0.201843	0.574003	0.0135486	1e-06	9	0.219117	0.26787	0.0608611	1e-06	31.0722	0.213881	0.331701	0.0400354	1e-06	21.1422
1.479	2.56812	2.44223	0.209619	0.347643	0.0206757	0.018983	15.7336	0.202505	0.568456	0.0134288	1e-06	9	0.219426	0.26498	0.0605269	1e-06	30.8988	0.214264	0.328164	0.0396604	1e-06	20.9563
1.48016	2.56451	2.44529	0.209766	0.344138	0.020303	0.0191441	15.5696	0.203161	0.562774	0.0133105	1e-06	9	0.219732	0.262112	0.0601952	1e-06	30.7267	0.214642	0.324631	0.039288	1e-06	20.7715
1.48132	2.56089	2.44835	0.210352	0.340909	0.0199453	0.0193109	15.4066	0.203811	0.556957	0.0131936	1e-06	9	0.220034	0.259266	0.0598657	1e-06	30.5559	0.215017	0.321105	0.0389182	1e-06	20.5878
1.48248	2.55728	2.45142	0.210645	0.337471	0.0196113	0.0195006	15.2435	0.204454	0.551009	0.0130783	1e-06	9	0.220334	0.256441	0.0595387	1e-06	30.3865	0.215387	0.317585	0.038551	1e-06	20.4051
1.48364	2.55366	2.45449	0.210938	0.334141	0.0192736	0.0196927	15.0743	0.205089	0.544931	0.0129645	1e-06	9	0.220629	0.253637	0.0592138	1e-06	30.2182	0.215753	0.314071	0.0381863	1e-06	20.2235
1.4848	2.55003	2.45756	0.210498	0.330915	0.0189347	0.0198888	14.9003	0.205718	0.538724	0.0128521	1e-06	9	0.220922	0.250855	0.0588913	1e-06	30.0513	0.216116	0.310564	0.037824	1e-06	20.0429
1.48596	2.54641	2.46064	0.213135	0.32859	0.0185803	0.0200637	14.7255	0.206339	0.53239	0.0127412	1e-06	9	0.221211	0.248093	0.0585709	1e-06	29.8856	0.216474	0.307064	0.0374642	1e-06	19.8634
1.48712	2.54278	2.46372	0.212256	0.323797	0.0182216	0.0202207	14.5596	0.206953	0.525931	0.0126317	1e-06	9	0.221498	0.245351	0.0582527	1e-06	29.721	0.216828	0.303572	0.0371068	1e-06	19.6849
1.48828	2.53915	2.46679	0.212842	0.320376	0.0178767	0.0203816	14.3877	0.207559	0.519348	0.0125236	1e-06	9	0.221781	0.242628	0.0579367	1e-06	29.5577	0.217178	0.300088	0.0367517	1e-06	19.5074
1.48944	2.53552	2.46987	0.212988	0.316721	0.017553	0.0205615	14.2156	0.208158	0.512643	0.0124169	1e-06	9	0.222061	0.239926	0.0576227	1e-06	29.3955	0.217524	0.296613	0.036399	1e-06	19.3309
1.4906	2.53188	2.47296	0.213281	0.313307	0.0172275	0.0207426	14.0379	0.208748	0.505818	0.0123115	1e-06	9	0.222337	0.237242	0.0573108	1e-06	29.2345	0.217867	0.293146	0.0360485	1e-06	19.1554
1.49176	2.52825	2.47604	0.213867	0.309971	0.0169021	0.0209284	13.8558	0.209331	0.498873	0.0122076	1e-06	9	0.222611	0.234577	0.057001	1e-06	29.0746	0.218205	0.289687	0.0357002	1e-06	18.9808
1.49292	2.52461	2.47913	0.21416	0.306387	0.0165602	0.0210935	13.6721	0.209906	0.491811	0.0121049	1e-06	9	0.222882	0.231931	0.0566931	1e-06	28.9159	0.218539	0.286239	0.0353542	1e-06	18.8072
1.49408	2.52097	2.48221	0.214453	0.302871	0.0162107	0.0212404	13.4885	0.210472	0.484634	0.0120036	1e-06	9	0.223149	0.229303	0.0563872	1e-06	28.7582	0.218869	0.282799	0.0350103	1e-06	18.6346
1.49524	2.51733	2.4853	0.214746	0.299419	0.0158747	0.0213887	13.3081	0.21103	0.477341	0.0119036	1e-06	9	0.223414	0.226693	0.0560833	1e-06	28.6016	0.219195	0.279369	0.0346685	1e-06	18.4629
1.4964	2.51369	2.48839	0.215039	0.296027	0.0155565	0.0215518	13.1277	0.211579	0.469936	0.0118049	1e-06	9	0.223675	0.224101	0.0557813	1e-06	28.446	0.219517	0.27595	0.0343288	1e-06	18.2921
1.49756	2.51005	2.49148	0.215625	0.29269	0.0152627	0.0217221	12.9541	0.21212	0.46242	0.0117075	1e-06	9	0.223933	0.221526	0.0554811	1e-06	28.2915	0.219836	0.27254	0.0339911	1e-06	18.1223
1.49872	2.50641	2.49456	0.215918	0.289083	0.0149659	0.0218952	12.7761	0.212652	0.454793	0.0116113	1e-06	9	0.224189	0.218968	0.0551828	1e-06	28.1381	0.22015	0.26914	0.0336555	1e-06	17.9533
1.49988	2.50277	2.49765	0.216211	0.285523	0.0146701	0.0220565	12.6001	0.213175	0.447058	0.0115164	1e-06	9	0.224441	0.216427	0.0548863	1e-06	27.9856	0.22046	0.265752	0.0333218	1e-06	17.7853
1.50104	2.49912	2.50074	0.216504	0.282004	0.0143643	0.0221986	12.4241	0.213689	0.439215	0.0114227	1e-06	9	0.224691	0.213902	0.0545916	1e-06	27.8341	0.220767	0.262373	0.0329901	1e-06	17.6181
1.5022	2.49548	2.50383	0.217969	0.278523	0.0140674	0.0223379	12.2508	0.214194	0.431267	0.0113302	1e-06	9	0.224938	0.211394	0.0542987	1e-06	27.6836	0.221069	0.259006	0.0326603	1e-06	17.4518
1.50336	2.49184	2.50692	0.21709	0.273792	0.0137884	0.0224885	12.0792	0.21469	0.423214	0.0112389	1e-06	9	0.225181	0.208902	0.0540075	1e-06	27.5341	0.221368	0.25565	0.0323323	1e-06	17.2863
1.50452	2.4882	2.51001	0.217383	0.270371	0.0135322	0.0226645	11.8984	0.215176	0.415058	0.0111488	1e-06	9	0.225422	0.206425	0.053718	1e-06	27.3855	0.221663	0.252305	0.0320062	1e-06	17.1217
1.50568	2.48456	2.5131	0.217676	0.266972	0.0132708	0.0228414	11.7125	0.215653	0.406801	0.0110599	1e-06	9	0.22566	0.203964	0.0534302	1e-06	27.2378	0.221954	0.248971	0.0316819	1e-06	16.9579
1.50684	2.48092	2.51619	0.217529	0.263592	0.0130231	0.023031	11.5262	0.21612	0.398443	0.0109721	1e-06	9	0.225896	0.201518	0.053144	1e-06	27.0911	0.222241	0.245648	0.0313594	1e-06	16.7949
1.508	2.47728	2.51927	0.218555	0.260706	0.0127655	0.0232034	11.3404	0.216577	0.389986	0.0108855	1e-06	9	0.226128	0.199088	0.0528595	1e-06	26.9453	0.222524	0.242337	0.0310386	1e-06	16.6328
1.50916	2.47364	2.52236	0.218555	0.25703	0.0125048	0.0233619	11.16	0.217025	0.38143	0.0107999	1e-06	9	0.226357	0.196672	0.0525766	1e-06	26.8003	0.222804	0.239038	0.0307195	1e-06	16.4714
1.51032	2.47	2.52544	0.219141	0.253679	0.0122599	0.0235283	10.9806	0.217462	0.372779	0.0107155	1e-06	9	0.226584	0.19427	0.0522953	1e-06	26.6562	0.223079	0.23575	0.0304022	1e-06	16.3108
1.51148	2.46637	2.52853	0.219434	0.25001	0.0120376	0.0237176	10.8013	0.217889	0.364032	0.0106322	1e-06	9	0.226808	0.191883	0.0520155	1e-06	26.513	0.223351	0.232474	0.0300864	1e-06	16.1511
1.51264	2.46273	2.53161	0.21958	0.246337	0.0118072	0.0239045	10.6155	0.218306	0.355191	0.0105499	1e-06	9	0.227029	0.189511	0.0517373	1e-06	26.3706	0.223619	0.22921	0.0297723	1e-06	15.992
1.5138	2.4591	2.53469	0.22002	0.242816	0.0115794	0.0240985	10.4246	0.218713	0.346257	0.0104687	1e-06	9	0.227248	0.187152	0.0514606	1e-06	26.2291	0.223883	0.225958	0.0294598	1e-06	15.8338
1.51496	2.45547	2.53777	0.220166	0.239123	0.01134	0.0242742	10.233	0.21911	0.337231	0.0103886	1e-06	9	0.227464	0.184806	0.0511854	1e-06	26.0884	0.224144	0.222718	0.0291489	1e-06	15.6762
1.51612	2.45185	2.54084	0.218262	0.235573	0.0110971	0.0244358	10.0418	0.219496	0.328114	0.0103095	1e-06	9	0.227677	0.182475	0.0509116	1e-06	25.9485	0.224401	0.21949	0.0288395	1e-06	15.5194
1.51728	2.44822	2.54392	0.219141	0.234407	0.0108691	0.0246029	9.85298	0.219871	0.318909	0.0102314	1e-06	9	0.227887	0.180156	0.0506393	1e-06	25.8094	0.224654	0.216274	0.0285316	1e-06	15.3634
1.51844	2.4446	2.54699	0.221045	0.232575	0.0106603	0.0247881	9.67769	0.220236	0.309615	0.0101543	1e-06	9	0.228095	0.177851	0.0503684	1e-06	25.671	0.224903	0.21307	0.0282251	1e-06	15.208
1.5196	2.44098	2.55006	0.221924	0.228956	0.0104456	0.0249698	9.50851	0.220589	0.300234	0.0100782	1e-06	9	0.2283	0.175558	0.050099	1e-06	25.5335	0.225148	0.209878	0.0279202	1e-06	15.0534
1.52076	2.43737	2.55312	0.221484	0.224665	0.0102279	0.0251491	9.33568	0.220932	0.290767	0.0100031	1e-06	9	0.228502	0.173278	0.0498309	1e-06	25.3967	0.22539	0.206698	0.0276166	1e-06	14.8994
1.52192	2.43376	2.55619	0.220752	0.22114	0.0100022	0.0253124	9.15838	0.221264	0.281216	0.00992898	1e-06	9	0.228702	0.171011	0.0495642	1e-06	25.2607	0.225629	0.20353	0.0273145	1e-06	14.7461
1.52308	2.43015	2.55925	0.221777	0.218697	0.00977137	0.0254605	8.98221	0.221584	0.27158	0.0098558	1e-06	9	0.228899	0.168756	0.0492988	1e-06	25.1254	0.225863	0.200374	0.0270137	1e-06	14.5935
1.52424	2.42654	2.56231	0.222363	0.21541	0.00955217	0.0256115	8.81449	0.221894	0.261862	0.00978356	1e-06	9	0.229093	0.166513	0.0490347	1e-06	24.9908	0.226094	0.197231	0.0267143	1e-06	14.4416
1.5254	2.42294	2.56536	0.222217	0.211755	0.00935127	0.0257764	8.64886	0.222192	0.252063	0.00971225	1e-06	9	0.229285	0.164282	0.048772	1e-06	24.8569	0.226322	0.1941	0.0264162	1e-06	14.2903
1.52656	2.41934	2.56841	0.222656	0.208529	0.00914207	0.0259345	8.4786	0.222479	0.242182	0.00964186	1e-06	9	0.229474	0.162063	0.0485105	1e-06	24.7238	0.226545	0.19098	0.0261194	1e-06	14.1397
1.52772	2.41575	2.57146	0.222949	0.205087	0.00892975	0.0260906	8.30682	0.222754	0.232223	0.00957238	1e-06	9	0.229661	0.159855	0.0482503	1e-06	24.5913	0.226765	0.187873	0.0258239	1e-06	13.9896
1.52888	2.41216	2.5745	0.221631	0.201585	0.00873338	0.0262598	8.13544	0.223017	0.222185	0.00950379	1e-06	9	0.229845	0.157659	0.0479914	1e-06	24.4595	0.226982	0.184778	0.0255296	1e-06	13.8403
1.53004	2.40858	2.57754	0.223389	0.199781	0.00852717	0.0264119	7.96379	0.223269	0.212057	0.00943608	2.96598e-05	9	0.230027	0.155474	0.0477336	1e-06	24.3285	0.227195	0.181695	0.0252366	1e-06	13.6915
1.5312	2.405	2.58057	0.223682	0.196308	0.00832091	0.0265541	7.80393	0.223509	0.20182	0.00936925	6.79656e-05	9	0.230206	0.1533	0.0474771	1e-06	24.198	0.227404	0.178624	0.0249447	1e-06	13.5433
1.53236	2.40143	2.58361	0.223975	0.192763	0.00813372	0.0267076	7.6465	0.223737	0.191469	0.00930328	0.000107967	9	0.230382	0.151137	0.0472218	1e-06	24.0682	0.22761	0.175566	0.0246541	1e-06	13.3957
1.53352	2.39786	2.58663	0.224121	0.189142	0.00795761	0.0268594	7.4925	0.223953	0.181005	0.00923816	0.000149655	9	0.230556	0.148985	0.0469677	1e-06	23.9391	0.227812	0.172519	0.0243646	1e-06	13.2487
1.53468	2.3943	2.58965	0.224414	0.185601	0.00777299	0.0270065	7.33304	0.224157	0.170427	0.00917389	0.000193018	9	0.230728	0.146844	0.0467147	1e-06	23.8106	0.228011	0.169483	0.0240762	1e-06	13.1023
1.53584	2.39074	2.59267	0.224414	0.181974	0.00760209	0.0271654	7.17272	0.224349	0.159734	0.00911046	0.000238042	9	0.230897	0.144713	0.0464629	1e-06	23.6828	0.228206	0.16646	0.0237889	1e-06	12.9565
1.537	2.38719	2.59568	0.224854	0.178579	0.00742068	0.0273077	7.01086	0.224528	0.148925	0.00904786	0.000284712	9	0.231064	0.142592	0.0462122	1e-06	23.5555	0.228398	0.163449	0.0235028	1e-06	12.8112
1.53816	2.38364	2.59869	0.225146	0.17493	0.00723317	0.0274366	6.84965	0.224694	0.138	0.00898609	0.000333006	9	0.231228	0.140481	0.0459626	1e-06	23.4289	0.228586	0.160449	0.0232177	1e-06	12.6664
1.53932	2.3801	2.60169	0.225146	0.171182	0.00706257	0.0275739	6.68981	0.224848	0.126959	0.00892512	0.000382905	9	0.23139	0.13838	0.0457141	1e-06	23.3028	0.228771	0.157461	0.0229336	1e-06	12.5222
1.54048	2.37657	2.60469	0.225293	0.167651	0.00691254	0.0277324	6.52734	0.224989	0.1158	0.00886497	0.000434383	9	0.231549	0.13629	0.0454667	1e-06	23.1774	0.228952	0.154485	0.0226506	1e-06	12.3785
1.54164	2.37304	2.60768	0.225439	0.164173	0.00675345	0.0278842	6.36039	0.225117	0.104524	0.00880561	0.000487413	9	0.231706	0.134209	0.0452204	1e-06	23.0525	0.22913	0.15152	0.0223686	1e-06	12.2354
1.5428	2.36952	2.61067	0.225879	0.160743	0.00660368	0.028045	6.19181	0.225231	0.0931288	0.00874705	0.000541966	9.00002	0.23186	0.132137	0.0449751	1e-06	22.9282	0.229305	0.148567	0.0220875	1e-06	12.0927
1.54396	2.36601	2.61365	0.225586	0.157036	0.00644679	0.0281911	6.02358	0.225333	0.0816147	0.00868927	0.000598009	9.0001	0.232012	0.130075	0.0447308	1e-06	22.8045	0.229476	0.145625	0.0218075	1e-06	11.9506
1.54512	2.36251	2.61662	0.224854	0.153849	0.00628566	0.0283258	5.85407	0.22542	0.0699807	0.00863227	0.000655506	9.0005	0.232162	0.128022	0.0444876	1e-06	22.6813	0.229644	0.142694	0.0215283	1e-06	11.8089
1.54628	2.35901	2.61959	0.226025	0.151659	0.00613481	0.0284646	5.68702	0.225495	0.0582242	0.00857605	0.00071442	9.00269	0.232309	0.125979	0.0442453	1e-06	22.5587	0.229808	0.139775	0.0212501	1e-06	11.6678
1.54744	2.35552	2.62255	0.226465	0.148379	0.00600336	0.0286201	5.52769	0.225555	0.0463342	0.00852059	0.00077471	9.01468	0.232454	0.123944	0.0440041	1e-06	22.4366	0.229969	0.136867	0.0209728	1e-06	11.5271
1.5486	2.35203	2.6255	0.227197	0.144807	0.00586169	0.0287663	5.36571	0.225602	0.0342499	0.00846589	0.000836333	9.0825	0.232597	0.121918	0.0437638	1e-06	22.3151	0.230126	0.13397	0.0206964	1e-06	11.3869
1.54976	2.34856	2.62845	0.226904	0.140617	0.00572434	0.0289165	5.20092	0.225635	0.021611	0.00841197	0.000899237	9.50188	0.232737	0.119901	0.0435245	1e-06	22.1941	0.230281	0.131084	0.0204209	1e-06	11.2471
1.55092	2.34509	2.63139	0.226758	0.136925	0.00560276	0.0290809	5.03094	0.225651	0.00545451	0.00835888	0.000963349	14.0464	0.232875	0.117893	0.0432862	1e-06	22.0736	0.230432	0.128209	0.0201462	1e-06	11.1078
1.55208	2.34163	2.63432	0.227051	0.133568	0.00547588	0.0292342	4.85883	0.225668	0.00767537	0.00830579	0.00102892	12.6745	0.233011	0.115893	0.0430488	1e-06	21.9536	0.230579	0.125345	0.0198723	1e-06	10.969
1.55324	2.33818	2.63725	0.227197	0.13006	0.00534973	0.029382	4.68719	0.225691	0.0128957	0.0082524	0.00109606	10.7431	0.233144	0.113902	0.0428123	1e-06	21.8341	0.230723	0.122492	0.0195993	1e-06	10.8305
1.5544	2.33474	2.64017	0.227197	0.126557	0.00523965	0.0295423	4.51515	0.225693	0.0180333	0.0082001	0.00116421	9.8367	0.233275	0.111919	0.0425767	1e-06	21.7151	0.230864	0.119649	0.019327	1e-06	10.6926
1.55556	2.33131	2.64308	0.227197	0.123215	0.00511761	0.0296912	4.33874	0.225704	-0.00306421	0.00814733	0.00123399	-16.1004	0.233404	0.109944	0.042342	1e-06	21.5967	0.231002	0.116817	0.0190555	1e-06	10.555
1.55672	2.32788	2.64599	0.22749	0.120028	0.00498887	0.0298353	4.1588	0.225704	0.0166264	0.00809513	0.00130493	10.023	0.23353	0.107977	0.0421082	1e-06	21.4786	0.231136	0.113996	0.0187848	1e-06	10.4178
1.55788	2.32447	2.64888	0.22749	0.116674	0.00487575	0.0299924	3.97973	0.225712	-0.00830565	0.00804249	0.0013775	-12.3581	0.233654	0.106019	0.0418753	1e-06	21.3611	0.231267	0.111185	0.0185148	1e-06	10.2811
1.55904	2.32106	2.65177	0.227783	0.113468	0.00475484	0.0301365	3.79974	0.225702	0.00652992	0.00799078	0.00145099	13.3278	0.233776	0.104068	0.0416432	1e-06	21.2441	0.231395	0.108384	0.0182455	1e-06	10.1447
1.5602	2.31767	2.65465	0.22793	0.110085	0.00463299	0.0302747	3.62004	0.225721	0.00903028	0.00793764	0.00152665	12.0279	0.233896	0.102124	0.041412	1e-06	21.1275	0.23152	0.105593	0.017977	1e-06	10.0088
1.56136	2.31428	2.65752	0.22793	0.106681	0.00452629	0.0304234	3.44061	0.225747	0.015221	0.00788417	0.00160396	10.2504	0.234013	0.100188	0.0411816	1e-06	21.0113	0.231641	0.102813	0.0177091	1e-06	9.87318
1.56252	2.3109	2.66039	0.22793	0.103413	0.00440595	0.0305572	3.25759	0.225752	0.0251393	0.00783169	0.0016821	9.30318	0.234128	0.0982603	0.040952	1e-06	20.8956	0.23176	0.100042	0.0174419	1e-06	9.73797
1.56368	2.30753	2.66324	0.228076	0.100276	0.00427646	0.0306811	3.0719	0.225773	0.00901519	0.00777851	0.00176212	12.0344	0.234241	0.0963394	0.0407233	1e-06	20.7804	0.231875	0.0972814	0.0171754	1e-06	9.60313
1.56484	2.30418	2.66609	0.228223	0.0971067	0.00416013	0.0308167	2.8862	0.225798	0.0145634	0.0077251	0.00184373	10.3736	0.234352	0.0944258	0.0404953	1e-06	20.6656	0.231986	0.0945305	0.0169095	1e-06	9.46864
1.566	2.30083	2.66893	0.226465	0.0938999	0.00404829	0.030945	2.70386	0.225802	0.0213377	0.00767272	0.00192604	9.52187	0.23446	0.0925194	0.0402681	1e-06	20.5512	0.232095	0.0917893	0.0166442	1e-06	9.33451
1.56716	2.2975	2.67176	0.226904	0.0927359	0.00393227	0.0310653	2.52054	0.225817	0.00223524	0.00761982	0.00201013	16.9931	0.234566	0.0906201	0.0400417	1e-06	20.4372	0.232201	0.0890577	0.0163796	1e-06	9.20072
1.56832	2.29417	2.67458	0.228662	0.0912088	0.00382277	0.031191	2.34821	0.225826	-0.00133962	0.00756725	0.00209536	-18.0841	0.23467	0.0887277	0.0398161	1e-06	20.3237	0.232303	0.0863356	0.0161155	1e-06	9.06727
1.56948	2.29086	2.67739	0.228369	0.0878738	0.00371501	0.0313051	2.18921	0.225827	0.0183261	0.00751498	0.00218173	9.80242	0.234772	0.0868423	0.0395912	1e-06	20.2105	0.232402	0.0836228	0.015852	1e-06	8.93415
1.57064	2.28755	2.68019	0.228662	0.084971	0.00359567	0.0314078	2.026	0.225838	-0.00596988	0.00746232	0.00226981	-13.6882	0.234872	0.0849636	0.0393671	1e-06	20.0978	0.232498	0.0809193	0.0155891	1e-06	8.80135
1.5718	2.28426	2.68298	0.228662	0.0818554	0.00348553	0.0315194	1.86292	0.225831	0.00899254	0.00741045	0.00235854	12.0442	0.234969	0.0830915	0.0391437	1e-06	19.9855	0.232591	0.078225	0.0153267	1e-06	8.66886
1.57296	2.28098	2.68577	0.228809	0.0788437	0.00339684	0.0316494	1.70075	0.225855	0.0130286	0.00735717	0.00244999	10.7103	0.235065	0.0812261	0.038921	1e-06	19.8736	0.232681	0.0755397	0.0150649	1e-06	8.53668
1.57412	2.27771	2.68854	0.228955	0.0757718	0.00330237	0.0317714	1.53745	0.225855	0.0135824	0.007305	0.00254171	10.5802	0.235158	0.0793671	0.0386991	1e-06	19.762	0.232767	0.0728633	0.0148035	1e-06	8.40481
1.57528	2.27446	2.6913	0.228955	0.0726358	0.00320742	0.0318904	1.3732	0.225856	0.0151452	0.00725278	0.00263483	10.264	0.235249	0.0775145	0.0384778	1e-06	19.6509	0.232851	0.0701957	0.0145427	1e-06	8.27322
1.57644	2.27121	2.69405	0.229102	0.069592	0.00312892	0.0320251	1.20811	0.22586	0.0204199	0.00720042	0.00272944	9.59498	0.235337	0.0756682	0.0382573	1e-06	19.5401	0.232931	0.0675369	0.0142824	1e-06	8.14193
1.5776	2.26798	2.69679	0.229102	0.0664762	0.00303733	0.0321462	1.0402	0.225873	-0.00196876	0.00714768	0.00282586	-17.3032	0.235424	0.0738282	0.0380374	1e-06	19.4297	0.233009	0.0648866	0.0140225	0.000239058	7.93245
1.57876	2.26476	2.69953	0.228809	0.0634449	0.0029519	0.032274	0.870037	0.225873	0.0155946	0.00709551	0.00292295	10.1854	0.235509	0.0719942	0.0378181	1e-06	19.3197	0.233083	0.0621487	0.0137631	0.000781437	7.62188
1.57992	2.26155	2.70225	0.227637	0.0608146	0.0028857	0.0324196	0.699902	0.225877	0.0210258	0.00704314	0.00302161	9.54564	0.235591	0.0701662	0.0375996	1e-06	19.21	0.233154	0.0593185	0.0135041	0.00133252	7.30761
1.58108	2.25836	2.70496	0.228955	0.059544	0.00281539	0.032559	0.530486	0.22589	-0.00137242	0.00699039	0.00312211	-18.0416	0.235672	0.0683442	0.0373817	1e-06	19.1007	0.233222	0.0563968	0.0132456	0.0018922	6.98967
1.58224	2.25517	2.70766	0.229102	0.0569063	0.00274398	0.0326964	0.369682	0.225891	0.0162613	0.00693819	0.00322322	10.0777	0.23575	0.0663214	0.0371644	0.000506957	18.9793	0.233286	0.0533842	0.0129876	0.00246038	6.66811
1.5834	2.25201	2.71034	0.228955	0.0541805	0.00268534	0.0328466	0.209835	0.225897	0.0224456	0.00688579	0.00332591	9.44547	0.235825	0.0637866	0.0369479	0.0011662	18.8273	0.233347	0.0502818	0.01273	0.00303692	6.34297
1.58456	2.24885	2.71302	0.229102	0.0516838	0.0026115	0.032982	0.0480174	0.225912	0.000865714	0.00683299	0.00343053	18.7204	0.235898	0.060759	0.0367323	0.00183552	18.6456	0.233404	0.0470902	0.0124728	0.00362172	6.0143
1.58572	2.24571	2.71569	0.229248	0.0490923	0.00254172	0.0331228	-0.113392	0.225916	-0.00665048	0.00678066	0.00353576	-13.2539	0.235966	0.0572946	0.0365176	0.00251477	18.4378	0.233458	0.0438103	0.0122161	0.00421462	5.68217
1.58688	2.24258	2.71834	0.229248	0.0464029	0.00248755	0.0332793	-0.273617	0.225906	0.00536944	0.00672889	0.00364141	14.1081	0.23603	0.0534424	0.036304	0.00320377	18.2067	0.233507	0.0404417	0.0119597	0.00481548	5.34746
1.58804	2.23946	2.72098	0.229395	0.0437724	0.00243574	0.0334331	-0.432251	0.225919	0.00207683	0.00667618	0.00374986	17.176	0.23609	0.0492454	0.0360916	0.00390231	17.955	0.233553	0.0369833	0.0117038	0.00542416	5.01038
1.5892	2.23636	2.72361	0.229248	0.0410372	0.00238391	0.033586	-0.59092	0.225925	-0.00473436	0.00662376	0.00385913	-14.5932	0.236144	0.0447411	0.0358803	0.00461015	17.6849	0.233594	0.0334334	0.0114483	0.00604049	4.67096
1.59036	2.23327	2.72623	0.229687	0.0385144	0.00233508	0.0337459	-0.752127	0.225919	0.00837523	0.00657185	0.0039688	12.3249	0.236194	0.0399623	0.0356703	0.00532703	17.3985	0.233631	0.0297907	0.0111931	0.00666429	4.32925
1.59152	2.2302	2.72884	0.229248	0.0355595	0.00226751	0.0338874	-0.914909	0.225939	0.00798874	0.00651889	0.00408168	12.5136	0.236237	0.0349377	0.0354616	0.00605267	17.0976	0.233664	0.0260539	0.0109383	0.00729539	3.98522
1.59268	2.22714	2.73144	0.229248	0.0331307	0.00219272	0.0340277	-1.08339	0.225958	0.00687791	0.00646598	0.0041958	13.1179	0.236275	0.0296923	0.0352542	0.00678678	16.7838	0.233693	0.022222	0.0106839	0.0079336	3.63876
1.59384	2.22409	2.73402	0.229395	0.0307439	0.00213154	0.0341826	-1.25075	0.225974	0.00422073	0.0064132	0.00431101	15.0191	0.236306	0.0242475	0.0350482	0.00752904	16.4588	0.233717	0.0182946	0.0104299	0.0085787	3.28969
1.595	2.22106	2.73659	0.229395	0.0282359	0.00209242	0.0343607	-1.41626	0.225984	-0.00142145	0.00636066	0.00442704	-17.9785	0.236331	0.0186213	0.0348435	0.0082791	16.1243	0.233737	0.014272	0.0101762	0.00923051	2.93766
1.59616	2.21805	2.73915	0.229248	0.0257637	0.00205052	0.0345368	-1.5825	0.225983	0.0138301	0.00630853	0.00454349	10.5253	0.236349	0.0128286	0.0346403	0.00903663	15.7816	0.233751	0.0101558	0.0099228	0.00988879	2.5822
1.59732	2.21505	2.74169	0.229248	0.0234846	0.00201119	0.0347148	-1.74841	0.225982	0.00994338	0.00625644	0.00466107	11.6576	0.23636	0.00688163	0.0344385	0.00980124	15.4316	0.233761	0.00594894	0.00966975	0.0105533	2.22262
1.59848	2.21206	2.74422	0.229102	0.0212352	0.00195194	0.0348741	-1.91542	0.226005	0.0103207	0.00620341	0.00478206	11.5181	0.236365	0.000794681	0.0342381	0.0105726	15.0716	0.233766	0.00165647	0.00941699	0.0112238	1.85811
1.59964	2.20909	2.74674	0.230127	0.0191731	0.00187732	0.0350204	-2.08354	0.226029	0.0110088	0.00615036	0.00490443	11.2824	0.236362	-0.00521523	0.0340392	0.0113502	14.5078	0.233766	-0.00269911	0.00916452	0.0119002	1.46751
1.6008	2.20614	2.74925	0.229248	0.0160132	0.00181281	0.0351802	-2.25016	0.226054	0.0125218	0.00609725	0.00502829	10.8387	0.236353	-0.0107318	0.0338415	0.0121339	13.8185	0.233761	-0.00704509	0.00891232	0.012582	1.04945
1.60196	2.2032	2.75174	0.229248	0.0138355	0.00176995	0.0353621	-2.41989	0.226049	0.00477364	0.00604533	0.00515046	14.5619	0.236338	-0.0154923	0.0336451	0.0129236	13.0188	0.233751	-0.0113388	0.00866037	0.0132691	0.611383
1.60312	2.20027	2.75422	0.229248	0.0116753	0.00172313	0.0355432	-2.59003	0.226059	-0.001749	0.00599282	0.00527536	-17.568	0.236317	-0.0192819	0.0334496	0.0137191	12.1456	0.233736	-0.0155348	0.00840863	0.0139614	0.15061
1.60428	2.19737	2.75669	0.229102	0.00952992	0.00167537	0.0357268	-2.76042	0.226057	0.011739	0.00594076	0.00540031	11.0563	0.236293	-0.0220013	0.0332548	0.0145206	11.2557	0.233716	-0.0195863	0.0081571	0.0146586	-0.331314
1.60544	2.19448	2.75914	0.229248	0.00755697	0.00161965	0.0358977	-2.92825	0.226084	0.0133673	0.00588764	0.0055294	10.6295	0.236267	-0.0236785	0.0330605	0.0153282	10.3994	0.233692	-0.023453	0.00790572	0.0153605	-0.830487
1.6066	2.1916	2.76158	0.229248	0.0054333	0.00154582	0.0360544	-3.09697	0.22608	0.00600676	0.00583567	0.0056565	13.6636	0.236239	-0.024439	0.0328664	0.0161422	9.60971	0.233663	-0.0271046	0.00765449	0.016067	-1.34233
1.60776	2.18874	2.764	0.229541	0.00331653	0.00147703	0.0362221	-3.26654	0.226092	-0.000163841	0.0057831	0.00578653	-19.7455	0.23621	-0.0244646	0.0326723	0.0169629	8.90261	0.23363	-0.0305212	0.00740336	0.0167779	-1.86248
1.60892	2.1859	2.76641	0.228955	0.000883368	0.00142405	0.036411	-3.43594	0.226093	0.0141668	0.00573095	0.00591654	10.4536	0.236182	-0.0239584	0.0324781	0.0177903	8.28065	0.233593	-0.0336923	0.00715231	0.0174933	-2.38708
1.61008	2.18307	2.76881	0.229248	-0.000907463	0.00137518	0.0366026	-3.60535	0.22609	0.00734403	0.00567893	0.0060473	12.8526	0.236155	-0.0231178	0.0322837	0.0186247	7.73709	0.233552	-0.0366157	0.00690131	0.0182128	-2.91282
1.61124	2.18026	2.77119	0.229102	-0.00302005	0.00132494	0.0367974	-3.77376	0.226105	0.00185982	0.00562629	0.00618122	17.4335	0.236129	-0.0221181	0.032089	0.0194662	7.25975	0.233508	-0.0392961	0.00665034	0.0189366	-3.43699
1.6124	2.17747	2.77356	0.229687	-0.00497617	0.00127713	0.0369839	-3.93664	0.226108	-0.0091382	0.00557406	0.00631502	-11.9815	0.236104	-0.0211031	0.0318941	0.0203148	6.83397	0.233461	-0.0417438	0.00639937	0.0196645	-3.9574
1.61356	2.1747	2.77591	0.229102	-0.00757982	0.00121001	0.0371576	-4.10199	0.22609	-0.00456588	0.00552255	0.00644742	-14.7295	0.23608	-0.0201818	0.0316988	0.0211705	6.44475	0.233412	-0.0439734	0.00614837	0.0203965	-4.47237
1.61472	2.17194	2.77825	0.229102	-0.00955188	0.00114517	0.0373406	-4.2722	0.226082	0.00435949	0.00547071	0.00658207	14.9009	0.236057	-0.0194296	0.0315034	0.0220332	6.07822	0.23336	-0.046003	0.00589734	0.0211324	-4.9807
1.61588	2.1692	2.78058	0.229102	-0.0115361	0.00109495	0.0375407	-4.44081	0.22609	-0.00490456	0.00541832	0.00671984	-14.4589	0.236035	-0.0188917	0.0313078	0.0229029	5.72248	0.233305	-0.0478529	0.00564625	0.0218723	-5.48161
1.61704	2.16648	2.78289	0.22749	-0.0135349	0.00107089	0.0377707	-4.60749	0.22608	0.00326615	0.00536651	0.00685657	15.8985	0.236013	-0.0185883	0.031112	0.0237793	5.36798	0.233249	-0.0495446	0.00539509	0.0226161	-5.97467
1.6182	2.16377	2.78518	0.228369	-0.0137876	0.00104662	0.0380045	-4.77463	0.226086	-0.00745145	0.0053142	0.0069963	-12.7939	0.235991	-0.01852	0.0309162	0.0246622	5.00757	0.23319	-0.0511003	0.00514384	0.0233638	-6.45974
1.61936	2.16109	2.78746	0.23042	-0.0150196	0.00102211	0.0382454	-4.93321	0.226071	-0.0022358	0.00526256	0.00713446	-16.9924	0.23597	-0.0186734	0.0307203	0.0255516	4.63638	0.23313	-0.0525422	0.00489248	0.0241152	-6.93695
1.62052	2.15842	2.78972	0.228662	-0.0185149	0.000974858	0.0384698	-5.09044	0.226066	0.00779268	0.00521058	0.00727507	12.6134	0.235948	-0.0190256	0.0305245	0.0264472	4.25146	0.233068	-0.0538919	0.00464102	0.0248703	-7.40656
1.62168	2.15577	2.79197	0.228809	-0.02011	0.000924177	0.038702	-5.26054	0.226081	0.000644544	0.00515799	0.00741933	19.0324	0.235926	-0.0195489	0.0303287	0.0273487	3.85156	0.233005	-0.0551702	0.00438944	0.0256291	-7.86901
1.62284	2.15313	2.7942	0.228809	-0.021891	0.000883948	0.0389484	-5.428	0.226081	-0.01358	0.00510587	0.00756272	-10.5808	0.235903	-0.020214	0.0301329	0.0282561	3.43668	0.23294	-0.0563967	0.00413774	0.0263914	-8.32479
1.624	2.15052	2.79642	0.228662	-0.0236998	0.000865742	0.0392187	-5.59229	0.226084	-0.00686942	0.00505363	0.00770772	-13.1229	0.235879	-0.0209925	0.0299373	0.0291691	3.0078	0.232874	-0.0575897	0.0038859	0.0271572	-8.77448
1.62516	2.14792	2.79862	0.228662	-0.0253784	0.000847066	0.0394931	-5.75649	0.22607	-0.00225314	0.00500195	0.00785117	-16.9727	0.235854	-0.0218589	0.0297418	0.0300876	2.56656	0.232806	-0.0587661	0.00363391	0.0279264	-9.21866
1.62632	2.14535	2.80081	0.228809	-0.0270892	0.000829446	0.039775	-5.92056	0.226065	0.00664799	0.00494998	0.00799702	13.2554	0.235828	-0.0227918	0.0295464	0.0310113	2.11494	0.232737	-0.0599413	0.00338179	0.0286988	-9.65793
1.62748	2.14279	2.80298	0.228809	-0.0289947	0.000785742	0.0400416	-6.08862	0.226076	-0.00280312	0.00489752	0.00814633	-16.3702	0.235801	-0.0237743	0.0293512	0.0319402	1.65509	0.232667	-0.0611292	0.0031295	0.0294744	-10.0929
1.62864	2.14025	2.80513	0.228516	-0.030937	0.000733719	0.0403109	-6.26066	0.226069	0.00510966	0.00484558	0.00829405	14.3013	0.235773	-0.0247946	0.0291561	0.032874	1.1891	0.232595	-0.0623423	0.00287706	0.0302531	-10.524
1.6298	2.13773	2.80727	0.228662	-0.0325979	0.000690357	0.0405942	-6.43323	0.226077	-0.00620419	0.00479323	0.008445	-13.5339	0.235743	-0.0258452	0.0289612	0.0338127	0.718908	0.232521	-0.0635917	0.00262446	0.0310346	-10.952
1.63096	2.13523	2.80939	0.228369	-0.0344606	0.000667996	0.040895	-6.60003	0.226063	-0.002115	0.00474151	0.00859357	-17.1316	0.235713	-0.0269227	0.0287664	0.034756	0.246169	0.232447	-0.0648874	0.00237169	0.0318189	-11.3771
1.63212	2.13275	2.81149	0.228516	-0.0360463	0.000673582	0.0412066	-6.75622	0.226058	0.0057888	0.00468954	0.00874447	13.8111	0.235681	-0.0280271	0.0285718	0.0357038	-0.227734	0.23237	-0.0662378	0.00211874	0.0326058	-11.8
1.63328	2.13029	2.81358	0.228516	-0.0378382	0.00067923	0.0415263	-6.91271	0.226066	-0.00563658	0.00463716	0.00889867	-13.9169	0.235648	-0.0291611	0.0283773	0.0366561	-0.701716	0.232292	-0.0676504	0.00186562	0.0333951	-12.2209
1.63444	2.12784	2.81565	0.228369	-0.0396781	0.000652404	0.0418236	-7.07416	0.226053	-0.00169268	0.0045854	0.00905028	-17.6372	0.235613	-0.0303293	0.028183	0.0376125	-1.17496	0.232213	-0.0691317	0.00161231	0.0341866	-12.6404
1.6356	2.12542	2.81771	0.228369	-0.041408	0.000603144	0.042109	-7.24026	0.226048	0.00594481	0.00453341	0.00920421	13.705	0.235577	-0.031538	0.0279888	0.038573	-1.6469	0.232132	-0.0706871	0.0013588	0.0349802	-13.0586
1.63676	2.12302	2.81975	0.228809	-0.0431905	0.00055618	0.0424059	-7.40798	0.226057	-0.00607186	0.00448104	0.00936144	-13.6204	0.23554	-0.0327942	0.0277948	0.0395373	-2.11715	0.232048	-0.072321	0.0011051	0.0357757	-13.4759
1.63792	2.12064	2.82177	0.228223	-0.0455087	0.000526948	0.0427164	-7.57088	0.226042	-0.00334401	0.0044293	0.00951563	-15.8222	0.235501	-0.0341056	0.027601	0.0405053	-2.58549	0.231963	-0.0740372	0.000851186	0.0365728	-13.8926
1.63908	2.11827	2.82377	0.228076	-0.0472435	0.000525484	0.0430586	-7.73478	0.226034	0.00194858	0.00437741	0.00967175	17.3272	0.235461	-0.03548	0.0274074	0.0414767	-3.05181	0.231876	-0.0758386	0.000597061	0.0373714	-14.3088
1.64024	2.11593	2.82576	0.228076	-0.048878	0.000523119	0.0434067	-7.89961	0.226034	-0.0144675	0.00432526	0.00983049	-10.3925	0.235419	-0.036925	0.0272139	0.0424514	-3.51608	0.231786	-0.0777277	0.000342712	0.0381712	-14.7248
1.6414	2.11361	2.82773	0.227783	-0.0505745	0.000495055	0.0437355	-8.06659	0.226033	-0.0154655	0.00427316	0.0099898	-10.2075	0.235375	-0.0384482	0.0270206	0.0434291	-3.97833	0.231695	-0.0797059	8.81305e-05	0.0389721	-15.1408
1.64256	2.11131	2.82968	0.228076	-0.0520146	0.000444357	0.0440532	-8.23798	0.226029	-0.0194438	0.00422113	0.0101496	-9.684	0.23533	-0.0400568	0.0268276	0.0444096	-4.43861	0.231601	-0.0817514	1e-06	0.0397737	-15.4906
1.64372	2.10903	2.83161	0.22793	-0.0538414	0.000394204	0.044381	-8.40968	0.226018	0.00564797	0.00416927	0.010309	13.9089	0.235282	-0.0417574	0.0266347	0.0453926	-4.89699	0.231504	-0.0838434	1e-06	0.0405759	-15.8057
1.64488	2.10677	2.83353	0.228516	-0.0555762	0.000356154	0.0447165	-8.57724	0.226025	-0.0083621	0.00411695	0.0104727	-12.3311	0.235233	-0.0435566	0.0264421	0.0463778	-5.35355	0.231405	-0.0859725	1e-06	0.0413785	-16.1199
1.64604	2.10453	2.83543	0.228223	-0.0580227	0.000343331	0.0450815	-8.7428	0.226003	-0.010412	0.00406535	0.0106318	-11.4855	0.235181	-0.04546	0.0262497	0.0473649	-5.80835	0.231304	-0.0881406	1e-06	0.0421813	-16.4335
1.6472	2.10231	2.83731	0.226611	-0.0602223	0.000330925	0.0454527	-8.91313	0.225975	-0.0161462	0.0040139	0.0107904	-10.0956	0.235127	-0.0474731	0.0260576	0.0483536	-6.26148	0.2312	-0.0903493	1e-06	0.0429842	-16.7466
1.64836	2.10011	2.83918	0.227783	-0.060735	0.000318145	0.0458134	-9.0803	0.225969	-0.0248257	0.0039619	0.0109542	-9.31707	0.235071	-0.0496009	0.0258657	0.0493436	-6.71297	0.231093	-0.0925996	1e-06	0.0437868	-17.0592
1.64952	2.09794	2.84102	0.226172	-0.0626073	0.000278632	0.0461601	-9.24572	0.22595	-0.00707207	0.00391021	0.0111161	-13.0052	0.235012	-0.0518478	0.0256741	0.0503346	-7.1629	0.230984	-0.0948922	1e-06	0.044589	-17.3713
1.65068	2.09578	2.84285	0.228369	-0.0627956	0.000237129	0.0465182	-9.41583	0.225931	-0.00848844	0.00385851	0.0112789	-12.2715	0.234951	-0.0542178	0.0254828	0.0513262	-7.61132	0.230872	-0.0972276	1e-06	0.0453906	-17.6832
1.65184	2.09365	2.84466	0.226758	-0.0654683	0.000202106	0.0468804	-9.57332	0.225908	-0.012229	0.00380689	0.0114416	-10.9172	0.234886	-0.0567144	0.0252918	0.052318	-8.05827	0.230757	-0.0996058	1e-06	0.0461914	-17.9947
1.653	2.09154	2.84645	0.227637	-0.0664607	0.000189016	0.0472664	-9.73373	0.225909	-0.0123166	0.0037547	0.0116103	-10.8934	0.234819	-0.0593406	0.0251011	0.0533097	-8.50384	0.23064	-0.102026	1e-06	0.0469912	-18.306
1.65416	2.08945	2.84822	0.22749	-0.0684993	0.000197066	0.0476659	-9.88306	0.225911	-0.0130449	0.00370251	0.0117798	-10.7063	0.234749	-0.0620989	0.0249108	0.0543008	-8.94809	0.230519	-0.104489	1e-06	0.0477898	-18.617
1.65532	2.08738	2.84998	0.227344	-0.0704645	0.000205347	0.0480787	-10.0378	0.22591	-0.0160137	0.00365036	0.0119498	-10.1165	0.234675	-0.064991	0.0247208	0.0552909	-9.39112	0.230396	-0.106994	1e-06	0.0485869	-18.9278
1.65648	2.08533	2.85171	0.227197	-0.0723589	0.000176679	0.0484689	-10.2008	0.225903	-0.0286376	0.00359836	0.0121191	-9.18393	0.234598	-0.0680182	0.0245311	0.0562796	-9.83303	0.230269	-0.109538	1e-06	0.0493824	-19.2383
1.65764	2.08331	2.85343	0.227197	-0.0741849	0.000142793	0.0488671	-10.3688	0.225878	-0.0139934	0.00354674	0.0122852	-10.4901	0.234517	-0.0711809	0.0243418	0.0572665	-10.274	0.23014	-0.112123	1e-06	0.0501761	-19.5484
1.6588	2.08131	2.85513	0.227051	-0.076105	0.000116042	0.0492676	-10.533	0.225874	-0.0210819	0.00349464	0.0124569	-9.54129	0.234433	-0.0744789	0.024153	0.0582511	-10.714	0.230008	-0.114746	1e-06	0.0509677	-19.8583
1.65996	2.07933	2.85681	0.22793	-0.0779614	0.00010724	0.0496827	-10.6936	0.225859	-0.00361243	0.0034428	0.0126267	-15.5655	0.234344	-0.0779111	0.0239645	0.059233	-11.1535	0.229872	-0.117406	1e-06	0.051757	-20.1678
1.66112	2.07737	2.85847	0.225879	-0.0808786	0.000127997	0.0501291	-10.8514	0.225846	-0.00331123	0.00339088	0.0127979	-15.8542	0.234252	-0.0814756	0.0237764	0.0602118	-11.5924	0.229734	-0.120102	1e-06	0.0525439	-20.4768
1.66228	2.07543	2.86011	0.226611	-0.0816543	0.000153547	0.0505895	-11.0179	0.225834	-0.00293399	0.00333894	0.0129699	-16.2337	0.234155	-0.0851696	0.0235887	0.0611868	-12.031	0.229592	-0.122832	1e-06	0.053328	-20.7854
1.66344	2.07352	2.86173	0.226758	-0.0833351	0.000143632	0.0510305	-11.186	0.225823	-0.00239771	0.00328699	0.0131429	-16.8097	0.234054	-0.0889893	0.0234014	0.0621578	-12.4695	0.229447	-0.125595	1e-06	0.0541093	-21.0935
1.6646	2.07163	2.86333	0.226758	-0.085282	0.000122258	0.051475	-11.359	0.225813	-0.00152956	0.00323501	0.0133168	-17.8409	0.233949	-0.0929303	0.0232146	0.0631242	-12.908	0.229298	-0.12839	1e-06	0.0548876	-21.401
1.66576	2.06976	2.86492	0.22749	-0.0873371	0.000104119	0.0519206	-11.53	0.225805	3.10555e-05	0.00318299	0.0134918	19.9513	0.233838	-0.0969871	0.0230282	0.0640856	-13.3468	0.229147	-0.131214	1e-06	0.0556625	-21.7078
1.66692	2.06792	2.86648	0.226611	-0.0903047	0.000103914	0.0523748	-11.6958	0.225799	-0.0249339	0.00313091	0.0136681	-9.31221	0.233724	-0.101153	0.0228423	0.0650414	-13.786	0.228992	-0.134067	1e-06	0.056434	-22.0138
1.66808	2.0661	2.86803	0.226465	-0.0924251	0.00012939	0.0528582	-11.8663	0.225777	-0.0116433	0.00307913	0.0138412	-11.0846	0.233604	-0.105422	0.0226568	0.0659913	-14.2256	0.228834	-0.136946	1e-06	0.0572018	-22.3191
1.66924	2.0643	2.86955	0.226025	-0.0945024	0.000155786	0.0533522	-12.041	0.225777	-0.0166608	0.00302694	0.0140204	-10.0179	0.233479	-0.109786	0.0224717	0.0669348	-14.6659	0.228672	-0.13985	1e-06	0.0579658	-22.6235
1.6704	2.06252	2.87106	0.226611	-0.0962189	0.000147495	0.0538256	-12.2243	0.225767	0.00312459	0.00297494	0.0141977	16.0394	0.233349	-0.114236	0.0222871	0.0678715	-15.1068	0.228507	-0.142777	1e-06	0.0587257	-22.9269
1.67156	2.06077	2.87254	0.223975	-0.0986987	0.000124651	0.0542991	-12.4125	0.225766	-0.0193403	0.00292275	0.0143782	-9.69419	0.233214	-0.118764	0.0221029	0.0688009	-15.5483	0.228339	-0.145726	1e-06	0.0594814	-23.2292
1.67272	2.05904	2.87401	0.226025	-0.0984183	0.000101946	0.0547718	-12.6027	0.225751	-0.00410201	0.00287082	0.0145557	-15.122	0.233073	-0.123361	0.0219192	0.0697227	-15.9903	0.228167	-0.148696	1e-06	0.0602326	-23.5304
1.67388	2.05734	2.87546	0.225879	-0.100507	9.32979e-05	0.0552475	-12.7729	0.225736	-0.00733087	0.00281888	0.0147335	-12.8598	0.232928	-0.128018	0.0217359	0.0706365	-16.4328	0.227991	-0.151683	1e-06	0.0609793	-23.8305
1.67504	2.05566	2.87688	0.225732	-0.102563	0.000110318	0.0557498	-12.9415	0.225711	-0.015618	0.0027671	0.0149095	-10.1815	0.232776	-0.132726	0.021553	0.0715418	-16.8756	0.227813	-0.154688	1e-06	0.0617213	-24.1292
1.6762	2.054	2.87829	0.225732	-0.104589	0.000147603	0.0562703	-13.1073	0.225702	0.00391525	0.00271504	0.0150903	15.2876	0.23262	-0.137475	0.0213706	0.0724384	-17.3185	0.22763	-0.157708	1e-06	0.0624583	-24.4266
1.67736	2.05236	2.87967	0.225439	-0.106748	0.000148641	0.0567707	-13.2822	0.225702	-0.0192083	0.00266284	0.0152742	-9.70741	0.232457	-0.142256	0.0211885	0.073326	-17.7612	0.227444	-0.160742	1e-06	0.0631903	-24.7225
1.67852	2.05075	2.88104	0.225293	-0.108722	0.000122731	0.0572611	-13.4663	0.225687	-0.00558692	0.00261087	0.0154545	-13.9519	0.23229	-0.147062	0.0210069	0.0742041	-18.2036	0.227255	-0.163788	1e-06	0.063917	-25.017
1.67968	2.04917	2.88239	0.223096	-0.110673	9.61827e-05	0.0577521	-13.6502	0.225666	-0.0123084	0.00255897	0.0156339	-10.8956	0.232116	-0.151882	0.0208256	0.0750726	-18.6452	0.227062	-0.166845	1e-06	0.0646384	-25.3098
1.68084	2.0476	2.88371	0.225293	-0.11036	8.05848e-05	0.0582398	-13.8262	0.225662	-0.0250636	0.00250681	0.0158186	-9.30647	0.231937	-0.156711	0.0206447	0.0759311	-19.0858	0.226865	-0.169912	1e-06	0.0653542	-25.601
1.682	2.04606	2.88502	0.225	-0.112592	8.83141e-05	0.058751	-13.9858	0.225639	-0.0150389	0.00245495	0.0159981	-10.2834	0.231753	-0.16154	0.0204642	0.0767795	-19.5251	0.226665	-0.172987	1e-06	0.0660643	-25.8904
1.68316	2.04455	2.8863	0.224854	-0.114647	0.000125579	0.0593011	-14.1474	0.225629	0.002694	0.00240286	0.0161823	16.486	0.231563	-0.166363	0.020284	0.0776174	-19.9627	0.226461	-0.176068	1e-06	0.0667686	-26.1781
1.68432	2.04306	2.88757	0.224707	-0.116686	0.000129667	0.0598336	-14.3174	0.225626	-0.0235915	0.00235068	0.0163689	-9.37821	0.231367	-0.171173	0.0201042	0.0784448	-20.3983	0.226254	-0.179154	1e-06	0.067467	-26.4639
1.68548	2.04159	2.88881	0.224561	-0.118713	9.67114e-05	0.0603428	-14.4952	0.225604	-0.0139869	0.00229876	0.0165504	-10.4915	0.231165	-0.175965	0.0199246	0.0792613	-20.8316	0.226043	-0.182245	1e-06	0.0681593	-26.7477
1.68664	2.04015	2.89003	0.224561	-0.120731	5.92103e-05	0.060855	-14.6756	0.225596	0.00474827	0.00224664	0.0167366	14.5821	0.230959	-0.180735	0.0197453	0.0800669	-21.2623	0.225828	-0.185338	1e-06	0.0688454	-27.0296
1.6878	2.03873	2.89124	0.224414	-0.122902	3.02881e-05	0.0613577	-14.8468	0.225596	-0.0202653	0.00219441	0.0169259	-9.60827	0.230746	-0.185476	0.0195663	0.0808614	-21.6902	0.22561	-0.188432	1e-06	0.0695252	-27.3093
1.68896	2.03734	2.89242	0.224414	-0.125069	2.07552e-05	0.0618763	-15.015	0.225578	-0.0102317	0.00214241	0.01711	-11.5503	0.230528	-0.190186	0.0193876	0.0816447	-22.1149	0.225388	-0.191527	1e-06	0.0701985	-27.587
1.69012	2.03597	2.89358	0.224707	-0.127394	3.83476e-05	0.062427	-15.1827	0.225577	-0.0204774	0.00209018	0.0173001	-9.59011	0.230305	-0.194861	0.0192091	0.0824167	-22.5362	0.225163	-0.19462	1e-06	0.0708653	-27.8625
1.69128	2.03462	2.89472	0.224268	-0.130202	5.82941e-05	0.0629716	-15.3475	0.225558	-0.0111541	0.00203818	0.017485	-11.2355	0.230076	-0.199498	0.0190307	0.0831772	-22.9539	0.224934	-0.197711	1e-06	0.0715255	-28.1357
1.69244	2.03331	2.89584	0.224707	-0.132694	4.26547e-05	0.0634924	-15.5235	0.225554	-0.0260728	0.00198597	0.0176753	-9.26533	0.229842	-0.204094	0.0188526	0.0839263	-23.3678	0.224701	-0.200799	1e-06	0.0721789	-28.4067
1.6936	2.03201	2.89694	0.222949	-0.135836	1.93025e-05	0.0640148	-15.7053	0.225528	-0.0188876	0.00193404	0.0178586	-9.74057	0.229603	-0.208647	0.0186747	0.0846637	-23.7778	0.224465	-0.203882	1e-06	0.0728255	-28.6753
1.69476	2.03074	2.89801	0.223535	-0.137226	6.04561e-07	0.0645208	-15.8835	0.225511	-0.00964492	0.00188199	0.0180453	-11.7733	0.229358	-0.213156	0.0184969	0.0853896	-24.1837	0.224226	-0.206959	1e-06	0.0734652	-28.9416
1.69592	2.0295	2.89907	0.222363	-0.139432	-1.0661e-06	0.0650359	-16.0519	0.225511	-0.0207195	0.00182974	0.0182379	-9.57005	0.229108	-0.217617	0.0183192	0.0861037	-24.5854	0.223982	-0.210029	1e-06	0.0740979	-29.2054
1.69708	2.02828	2.90011	0.223975	-0.140532	2.12616e-05	0.0655793	-16.2198	0.225491	-0.0129753	0.0017777	0.0184245	-10.7234	0.228853	-0.222031	0.0181416	0.0868062	-24.9827	0.223735	-0.213092	1e-06	0.0747235	-29.4668
1.69824	2.02708	2.90112	0.223682	-0.143574	7.38144e-05	0.0661509	-16.3775	0.225483	0.00277375	0.00172553	0.0186155	16.4012	0.228593	-0.226396	0.0179641	0.087497	-25.3756	0.223485	-0.216146	1e-06	0.075342	-29.7256
1.6994	2.02591	2.90211	0.223096	-0.146478	9.08011e-05	0.0667004	-16.548	0.225478	-0.0278128	0.00167331	0.018808	-9.20693	0.228328	-0.230711	0.0177867	0.0881761	-25.764	0.223231	-0.21919	1e-06	0.0759533	-29.9819
1.70056	2.02477	2.90308	0.223975	-0.148926	8.85141e-05	0.0672438	-16.7292	0.225448	-0.0224054	0.00162134	0.0189925	-9.44804	0.228058	-0.234976	0.0176093	0.0888435	-26.1478	0.222973	-0.222224	1e-06	0.0765573	-30.2356
1.70172	2.02365	2.90403	0.222363	-0.152525	8.63204e-05	0.0677627	-16.901	0.225426	-0.0163277	0.00156929	0.0191796	-10.0676	0.227783	-0.239189	0.0174319	0.0894992	-26.527	0.222712	-0.225246	1e-06	0.077154	-30.4867
1.70288	2.02255	2.90496	0.222949	-0.154555	9.81636e-05	0.0682807	-17.0733	0.225411	-0.00756227	0.00151715	0.0193699	-12.7343	0.227503	-0.243351	0.0172546	0.0901433	-26.9016	0.222448	-0.228255	1e-06	0.0777434	-30.7351
1.70404	2.02148	2.90587	0.222217	-0.157422	0.000134906	0.0688212	-17.2409	0.225415	-0.0152191	0.00146484	0.019567	-10.2507	0.227218	-0.247461	0.0170772	0.0907757	-27.2715	0.22218	-0.231251	1e-06	0.0783253	-30.9809
1.7052	2.02044	2.90675	0.222803	-0.159687	0.000200468	0.069404	-17.4151	0.225402	-0.00610838	0.00141267	0.0197586	-13.5964	0.226929	-0.251519	0.0168998	0.0913966	-27.6367	0.221908	-0.234233	1e-06	0.0788998	-31.2239
1.70636	2.01942	2.90762	0.221924	-0.162796	0.00022985	0.069965	-17.5975	0.225374	-0.0215245	0.00136063	0.0199451	-9.50813	0.226635	-0.255524	0.0167223	0.0920059	-27.9972	0.221633	-0.237199	1e-06	0.0794667	-31.4642
1.70752	2.01843	2.90846	0.221777	-0.165151	0.000238585	0.0705186	-17.7917	0.225352	-0.0165929	0.00130852	0.0201338	-10.0279	0.226336	-0.259478	0.0165448	0.0926037	-28.353	0.221355	-0.24015	1e-06	0.0800262	-31.7017
1.70868	2.01746	2.90928	0.221777	-0.167554	0.00024373	0.0710534	-17.9799	0.225336	-0.00974812	0.00125635	0.0203253	-11.7327	0.226033	-0.263379	0.0163671	0.0931901	-28.7041	0.221073	-0.243084	1e-06	0.0805781	-31.9365
1.70984	2.01652	2.91008	0.221631	-0.17017	0.000257688	0.0715791	-18.1603	0.225333	-0.0292028	0.00120408	0.0205216	-9.16967	0.225725	-0.267228	0.0161893	0.0937652	-29.0505	0.220787	-0.246001	1e-06	0.0811225	-32.1684
1.711	2.0156	2.91085	0.221191	-0.172842	0.000293649	0.0721237	-18.3392	0.225301	-0.0261959	0.00115201	0.0207074	-9.2607	0.225413	-0.271026	0.0160114	0.094329	-29.3923	0.220499	-0.248899	1e-06	0.0816592	-32.3975
1.71216	2.01471	2.91161	0.220898	-0.175252	0.000359406	0.0727094	-18.5223	0.225272	-0.0231621	0.0010999	0.0208947	-9.40213	0.225096	-0.274771	0.0158333	0.0948816	-29.7294	0.220207	-0.251779	1e-06	0.0821884	-32.6237
1.71332	2.01385	2.91234	0.220752	-0.177564	0.000390733	0.0732743	-18.7139	0.225247	-0.019944	0.00104776	0.0210835	-9.63683	0.224775	-0.278466	0.0156551	0.0954231	-30.0619	0.219912	-0.25464	1e-06	0.0827099	-32.8471
1.71448	2.01301	2.91305	0.220605	-0.179942	0.000392321	0.0738269	-18.9146	0.225226	-0.0162158	0.000995568	0.0212742	-10.0848	0.22445	-0.282109	0.0154766	0.0959535	-30.3898	0.219613	-0.25748	1e-06	0.0832239	-33.0677
1.71564	2.0122	2.91374	0.220459	-0.182387	0.000381991	0.0743624	-19.1141	0.22521	-0.011068	0.00094334	0.0214669	-11.2631	0.224121	-0.285702	0.015298	0.0964731	-30.7132	0.219311	-0.2603	1e-06	0.0837302	-33.2853
1.7168	2.01141	2.91441	0.221631	-0.184904	0.000378325	0.07488	-19.3032	0.225202	0.000880262	0.000891057	0.0216633	18.7002	0.223787	-0.289244	0.0151191	0.0969818	-31.032	0.219006	-0.263099	1e-06	0.0842289	-33.5001
1.71796	2.01065	2.91505	0.22002	-0.188937	0.000392166	0.0754073	-19.4885	0.225191	-0.039415	0.000838783	0.0218587	-9.03945	0.22345	-0.292737	0.0149399	0.0974797	-31.3463	0.218697	-0.265876	1e-06	0.08472	-33.7119
1.71912	2.00992	2.91568	0.218555	-0.191448	0.000434379	0.0759708	-19.6846	0.225146	-0.0384932	0.000786674	0.0220403	-9.045	0.223108	-0.29618	0.0147604	0.097967	-31.6562	0.218386	-0.26863	1e-06	0.0852036	-33.9209
1.72028	2.00921	2.91628	0.219287	-0.192598	0.000470151	0.0765245	-19.8805	0.225102	-0.0377925	0.000734536	0.0222224	-9.04974	0.222763	-0.299575	0.0145807	0.0984438	-31.9617	0.218071	-0.271362	1e-06	0.0856795	-34.1269
1.72144	2.00853	2.91686	0.219727	-0.194794	0.00046931	0.0770623	-20.0801	0.225058	-0.0373156	0.000682371	0.0224047	-9.05324	0.222413	-0.30292	0.0144007	0.0989102	-32.2628	0.217753	-0.274071	1e-06	0.0861479	-34.3301
1.7226	2.00787	2.91741	0.218994	-0.197719	0.000452775	0.0775777	-20.2771	0.225015	-0.037066	0.00063018	0.0225873	-9.05517	0.22206	-0.306218	0.0142203	0.0993663	-32.5597	0.217432	-0.276755	1e-06	0.0866088	-34.5303
1.72376	2.00724	2.91795	0.218994	-0.200093	0.000442219	0.0780701	-20.4645	0.224972	-0.0370479	0.000577964	0.0227699	-9.05532	0.221703	-0.309469	0.0140395	0.0998121	-32.8522	0.217108	-0.279416	1e-06	0.0870621	-34.7276
1.72492	2.00663	2.91846	0.218701	-0.202721	0.000448477	0.0785677	-20.6457	0.224929	-0.0372655	0.000525725	0.0229525	-9.05362	0.221342	-0.312673	0.0138584	0.100248	-33.1406	0.216781	-0.282052	1e-06	0.0875079	-34.922
1.72608	2.00606	2.91895	0.218408	-0.205285	0.000479303	0.0790931	-20.8274	0.224886	-0.0377228	0.000473463	0.0231348	-9.05023	0.220978	-0.31583	0.0136769	0.100674	-33.4247	0.21645	-0.284663	1e-06	0.0879463	-35.1135
1.72724	2.0055	2.91942	0.218408	-0.20779	0.000512269	0.0796321	-21.0145	0.224842	-0.0384233	0.000421179	0.0233169	-9.04545	0.220609	-0.318942	0.013495	0.10109	-33.7048	0.216117	-0.287249	1e-06	0.0883773	-35.3021
1.7284	2.00498	2.91987	0.217969	-0.210558	0.000511	0.0801474	-21.209	0.224797	-0.0393693	0.000368873	0.0234985	-9.0397	0.220238	-0.322009	0.0133127	0.101496	-33.9808	0.215781	-0.289808	1e-06	0.0888009	-35.4878
1.72956	2.00448	2.92029	0.217529	-0.213113	0.000491765	0.0806436	-21.4065	0.22475	-0.0405622	0.000316544	0.0236795	-9.03348	0.219862	-0.325031	0.0131299	0.101892	-34.2528	0.215441	-0.292342	1e-06	0.0892171	-35.6705
1.73072	2.004	2.92069	0.217676	-0.215458	0.000472361	0.0811066	-21.591	0.224702	-0.0420017	0.000264192	0.0238598	-9.02726	0.219484	-0.32801	0.0129467	0.10228	-34.5209	0.215099	-0.29485	1e-06	0.089626	-35.8504
1.73188	2.00356	2.92107	0.217529	-0.218236	0.000468258	0.081564	-21.7652	0.224653	-0.0436867	0.000211815	0.0240392	-9.02143	0.219101	-0.330945	0.012763	0.102657	-34.785	0.214754	-0.297331	1e-06	0.0900276	-36.0275
1.73304	2.00314	2.92143	0.219287	-0.221131	0.000486425	0.0820429	-21.9393	0.224601	-0.045615	0.000159413	0.0242175	-9.01627	0.218716	-0.333837	0.0125788	0.103026	-35.0454	0.214406	-0.299785	1e-06	0.090422	-36.2016
1.7342	2.00274	2.92176	0.216943	-0.22623	0.000533084	0.0825655	-22.12	0.224547	-0.0477839	0.000106984	0.0243946	-9.01193	0.218327	-0.336688	0.0123941	0.103385	-35.3019	0.214055	-0.302211	1e-06	0.0908092	-36.3729
1.73536	2.00238	2.92207	0.21665	-0.229052	0.000544759	0.0830627	-22.3234	0.22449	-0.05019	5.45256e-05	0.0245704	-9.00846	0.217935	-0.339497	0.0122089	0.103735	-35.5547	0.213702	-0.304611	1e-06	0.0911893	-36.5414
1.73652	2.00203	2.92236	0.216357	-0.231844	0.000538512	0.0835461	-22.5321	0.22443	-0.0528303	2.03575e-06	0.0247447	-9.0058	0.217539	-0.342265	0.0120231	0.104077	-35.8039	0.213346	-0.306983	1e-06	0.0915623	-36.707
1.73768	2.00172	2.92263	0.215918	-0.234609	0.000522857	0.0839844	-22.7289	0.224367	-0.0556719	1e-06	0.0249174	-9.00387	0.217141	-0.344993	0.0118367	0.10441	-36.0494	0.212987	-0.309327	1e-06	0.0919283	-36.8698
1.73884	2.00143	2.92287	0.215771	-0.237192	0.000515594	0.0844046	-22.916	0.224301	-0.0586823	1e-06	0.0250882	-9.00252	0.216739	-0.347682	0.0116498	0.104734	-36.2914	0.212625	-0.311643	1e-06	0.0922873	-37.0298
1.74	2.00117	2.9231	0.215625	-0.239915	0.000529112	0.0848382	-23.0992	0.224231	-0.0618577	1e-06	0.0252572	-9.0016	0.216334	-0.350332	0.0114622	0.105049	-36.5299	0.21226	-0.313931	1e-06	0.0926394	-37.1871
1.74116	2.00093	2.9233	0.215186	-0.242783	0.000571175	0.0853098	-23.2858	0.224157	-0.0651954	1e-06	0.0254241	-9.00099	0.215926	-0.352943	0.0112741	0.105356	-36.7649	0.211893	-0.316191	1e-06	0.0929846	-37.3415
1.74232	2.00072	2.92347	0.215186	-0.245477	0.000604647	0.0857819	-23.4793	0.22408	-0.0686928	1e-06	0.0255889	-9.0006	0.215515	-0.355517	0.0110853	0.105655	-36.9965	0.211524	-0.318422	1e-06	0.093323	-37.4932
1.74348	2.00054	2.92363	0.212988	-0.248484	0.000617947	0.0862398	-23.6784	0.223998	-0.0723473	1e-06	0.0257514	-9.00036	0.215101	-0.358054	0.0108958	0.105945	-37.2249	0.211152	-0.320625	1e-06	0.0936547	-37.6422
1.74464	2.00038	2.92376	0.214453	-0.249401	0.000618842	0.0866514	-23.868	0.223912	-0.0761566	1e-06	0.0259116	-9.00021	0.214685	-0.360555	0.0107057	0.106228	-37.4499	0.210777	-0.322799	1e-06	0.0939797	-37.7884
1.7458	2.00026	2.92387	0.214014	-0.252238	0.000625926	0.0870412	-24.0365	0.223821	-0.0801179	1e-06	0.0260692	-9.00012	0.214265	-0.36302	0.0105149	0.106502	-37.6718	0.2104	-0.324945	1e-06	0.094298	-37.9319
1.74696	2.00015	2.92396	0.213721	-0.254914	0.000650057	0.0874409	-24.2031	0.223726	-0.0842288	1e-06	0.0262242	-9.00007	0.213842	-0.36545	0.0103234	0.106769	-37.8905	0.21002	-0.327062	1e-06	0.0946098	-38.0728
1.74812	2.00008	2.92402	0.213574	-0.257593	0.000700562	0.0878772	-24.3733	0.223626	-0.0884867	1e-06	0.0263765	-9.00004	0.213417	-0.367845	0.0101312	0.107028	-38.1061	0.209638	-0.32915	1e-06	0.0949151	-38.211
1.74928	2.00003	2.92407	0.211963	-0.260439	0.00074264	0.0883126	-24.5489	0.223521	-0.0928888	1e-06	0.0265258	-9.00002	0.212989	-0.370207	0.00993821	0.107279	-38.3186	0.209253	-0.33121	1e-06	0.095214	-38.3466
1.75044	2	2.92409	0.211084	-0.261852	0.000763173	0.0887339	-24.7318	0.22341	-0.0974323	1e-06	0.0266723	-9.00001	0.212558	-0.372535	0.0097445	0.107523	-38.5282	0.208867	-0.33324	1e-06	0.0955065	-38.4795
1.7516	2.00001	2.92408	0.212402	-0.262636	0.000770709	0.0891121	-24.8972	0.223294	-0.102114	1e-06	0.0268156	-9.00001	0.212125	-0.374831	0.00955001	0.10776	-38.7348	0.208477	-0.335242	1e-06	0.0957927	-38.6099
1.75276	2.00003	2.92406	0.212402	-0.265196	0.000783853	0.0894632	-25.039	0.223173	-0.106932	1e-06	0.0269557	-9	0.211689	-0.377095	0.00935473	0.107989	-38.9386	0.208086	-0.337215	1e-06	0.0960726	-38.7376
1.75392	2.00009	2.92401	0.212549	-0.268093	0.000812694	0.0898178	-25.1754	0.223046	-0.111882	1e-06	0.0270926	-9	0.21125	-0.379328	0.00915865	0.108211	-39.1395	0.207692	-0.339159	1e-06	0.0963464	-38.8628
1.75508	2.00017	2.92394	0.21167	-0.27149	0.000865017	0.0901997	-25.3144	0.222914	-0.116961	1e-06	0.027226	-9	0.210809	-0.381529	0.00896175	0.108426	-39.3376	0.207296	-0.341074	1e-06	0.096614	-38.9855
1.75624	2.00028	2.92385	0.211377	-0.27427	0.000909896	0.0905829	-25.4636	0.222775	-0.122166	1e-06	0.0273559	-9	0.210365	-0.383701	0.008764	0.108633	-39.5331	0.206898	-0.342961	1e-06	0.0968757	-39.1057
1.7574	2.00042	2.92373	0.211084	-0.277077	0.000930343	0.0909502	-25.6204	0.22263	-0.127493	1e-06	0.0274822	-9	0.209918	-0.385843	0.00856541	0.108834	-39.7258	0.206498	-0.344819	1e-06	0.0971313	-39.2234
1.75856	2.00058	2.9236	0.210791	-0.279916	0.000936456	0.0912827	-25.7724	0.222479	-0.13294	1e-06	0.0276049	-9	0.20947	-0.387955	0.00836593	0.109029	-39.916	0.206095	-0.346648	1e-06	0.097381	-39.3386
1.75972	2.00077	2.92344	0.210205	-0.282789	0.00093599	0.091576	-25.9141	0.222322	-0.138501	1e-06	0.0277237	-9	0.209018	-0.39004	0.00816557	0.109216	-40.1036	0.20569	-0.348449	1e-06	0.0976249	-39.4514
1.76088	2.00098	2.92325	0.209912	-0.28538	0.000949865	0.0918648	-26.0498	0.222158	-0.144175	1e-06	0.0278386	-9	0.208565	-0.392096	0.0079643	0.109397	-40.2887	0.205284	-0.350221	1e-06	0.0978631	-39.5617
1.76204	2.00123	2.92305	0.207568	-0.288013	0.000984297	0.092174	-26.185	0.221987	-0.149956	1e-06	0.0279496	-9	0.208109	-0.394125	0.0077621	0.109572	-40.4713	0.204875	-0.351965	1e-06	0.0980955	-39.6697
1.7632	2.00149	2.92282	0.209326	-0.288447	0.00100911	0.0924841	-26.3268	0.22181	-0.155842	1e-06	0.0280566	-9	0.20765	-0.396128	0.00755897	0.10974	-40.6515	0.204465	-0.353681	1e-06	0.0983222	-39.7753
1.76436	2.00179	2.92257	0.208887	-0.29117	0.00102744	0.092793	-26.4596	0.221626	-0.161828	1e-06	0.0281595	-9	0.20719	-0.398104	0.00735487	0.109902	-40.8293	0.204052	-0.355368	1e-06	0.0985434	-39.8786
1.76552	2.00211	2.9223	0.20874	-0.293782	0.00103079	0.0930741	-26.5903	0.221434	-0.16791	1e-06	0.0282581	-9	0.206727	-0.400054	0.0071498	0.110057	-41.0049	0.203637	-0.357027	1e-06	0.0987591	-39.9795
1.76668	2.00246	2.922	0.208447	-0.296607	0.00102457	0.0933067	-26.7073	0.221236	-0.174085	1e-06	0.0283526	-9	0.206262	-0.40198	0.00694373	0.110207	-41.1782	0.203221	-0.358659	1e-06	0.0989694	-40.0782
1.76784	2.00283	2.92169	0.208008	-0.299488	0.00102816	0.0935268	-26.817	0.22103	-0.180348	1e-06	0.0284427	-9	0.205794	-0.40388	0.00673665	0.11035	-41.3492	0.202803	-0.360262	1e-06	0.0991742	-40.1745
1.769	2.00323	2.92135	0.208301	-0.302268	0.00105163	0.0937626	-26.9265	0.220818	-0.186695	1e-06	0.0285285	-9	0.205325	-0.405757	0.00652854	0.110487	-41.5181	0.202382	-0.361838	1e-06	0.0993738	-40.2687
1.77016	2.00366	2.92099	0.206836	-0.305752	0.00108184	0.0940036	-27.0373	0.220597	-0.193122	1e-06	0.0286099	-9	0.204853	-0.40761	0.00631939	0.110619	-41.6849	0.20196	-0.363387	1e-06	0.0995681	-40.3606
1.77132	2.00411	2.9206	0.205811	-0.308021	0.00110256	0.0942399	-27.1577	0.220369	-0.199624	1e-06	0.0286869	-9	0.204379	-0.409439	0.00610917	0.110745	-41.8495	0.201537	-0.364908	1e-06	0.0997573	-40.4503
1.77248	2.00459	2.9202	0.205225	-0.309559	0.00110684	0.0944525	-27.276	0.220134	-0.206198	1e-06	0.0287593	-9	0.203903	-0.411247	0.00589787	0.110865	-42.0122	0.201111	-0.366401	1e-06	0.0999413	-40.5378
1.77364	2.0051	2.91977	0.206689	-0.310849	0.00110321	0.0946129	-27.3718	0.219891	-0.212839	1e-06	0.0288273	-9	0.203425	-0.413032	0.00568547	0.110979	-42.1728	0.200684	-0.367868	1e-06	0.10012	-40.6231
1.7748	2.00563	2.91932	0.206104	-0.314137	0.00110173	0.094751	-27.451	0.21964	-0.219543	1e-06	0.0288907	-9	0.202945	-0.414795	0.00547196	0.111088	-42.3316	0.200255	-0.369308	1e-06	0.100294	-40.7064
1.77596	2.00619	2.91884	0.205518	-0.317182	0.00111636	0.0948962	-27.5311	0.219382	-0.226305	1e-06	0.0289496	-9	0.202463	-0.416537	0.0052573	0.111192	-42.4884	0.199825	-0.370721	1e-06	0.100463	-40.7875
1.77712	2.00677	2.91835	0.205078	-0.319989	0.00115562	0.0950743	-27.6169	0.219115	-0.233121	1e-06	0.0290039	-9	0.201978	-0.418259	0.0050415	0.11129	-42.6433	0.199393	-0.372108	1e-06	0.100627	-40.8666
1.77828	2.00738	2.91783	0.204639	-0.32272	0.00118549	0.0952452	-27.7074	0.218841	-0.239987	1e-06	0.0290536	-9	0.201492	-0.41996	0.00482452	0.111382	-42.7964	0.198959	-0.373468	1e-06	0.100787	-40.9436
1.77944	2.00802	2.91729	0.204346	-0.325381	0.00120289	0.0953992	-27.7995	0.218558	-0.246899	1e-06	0.0290987	-9	0.201004	-0.421642	0.00460635	0.11147	-42.9478	0.198524	-0.374802	1e-06	0.100942	-41.0185
1.7806	2.00868	2.91673	0.203906	-0.328134	0.00120941	0.0955022	-27.8781	0.218268	-0.253851	1e-06	0.0291392	-9	0.200514	-0.423305	0.00438697	0.111552	-43.0974	0.198087	-0.37611	1e-06	0.101092	-41.0915
1.78176	2.00937	2.91614	0.204492	-0.330823	0.0012128	0.0955769	-27.9494	0.21797	-0.26084	1e-06	0.0291752	-9	0.200022	-0.424948	0.00416636	0.111629	-43.2453	0.197649	-0.377392	1e-06	0.101237	-41.1625
1.78292	2.01008	2.91554	0.20332	-0.334573	0.0012301	0.0956591	-28.0193	0.217663	-0.267861	1e-06	0.0292066	-9	0.199528	-0.426573	0.0039445	0.111701	-43.3916	0.197209	-0.378648	1e-06	0.101378	-41.2315
1.78408	2.01082	2.91491	0.201416	-0.337465	0.00126831	0.0957713	-28.1003	0.217348	-0.27491	1e-06	0.0292335	-9	0.199032	-0.428181	0.00372138	0.111769	-43.5363	0.196768	-0.37988	1e-06	0.101514	-41.2986
1.78524	2.01159	2.91426	0.202148	-0.338702	0.00130037	0.0958787	-28.186	0.217025	-0.281982	1e-06	0.0292558	-9	0.198535	-0.42977	0.00349698	0.111831	-43.6793	0.196325	-0.381086	1e-06	0.101646	-41.3637
1.7864	2.01238	2.91359	0.201855	-0.34117	0.00134181	0.0959816	-28.2592	0.216694	-0.289074	1e-06	0.0292737	-9	0.198035	-0.431343	0.00327127	0.111888	-43.8209	0.195882	-0.382267	1e-06	0.101773	-41.427
1.78756	2.0132	2.91289	0.20127	-0.34375	0.00137021	0.0960335	-28.3192	0.216354	-0.296181	1e-06	0.0292871	-9	0.197534	-0.432899	0.00304423	0.111941	-43.9609	0.195436	-0.383423	1e-06	0.101897	-41.4883
1.78872	2.01405	2.91217	0.201709	-0.346126	0.0013949	0.0960524	-28.3694	0.216007	-0.303298	1e-06	0.0292961	-9	0.197031	-0.434438	0.00281586	0.111989	-44.0994	0.19499	-0.384554	1e-06	0.102015	-41.5479
1.78988	2.01492	2.91144	0.200537	-0.349422	0.00143298	0.0960732	-28.4148	0.215651	-0.310422	1e-06	0.0293007	-9	0.196526	-0.435962	0.00258611	0.112032	-44.2366	0.194542	-0.385661	1e-06	0.10213	-41.6056
1.79104	2.01581	2.91068	0.20083	-0.351879	0.00148989	0.096119	-28.4679	0.215287	-0.317548	1e-06	0.029301	-9	0.19602	-0.43747	0.00235499	0.112071	-44.3723	0.194093	-0.386745	1e-06	0.102241	-41.6615
1.7922	2.01673	2.9099	0.20127	-0.355104	0.00153473	0.0961559	-28.5248	0.214914	-0.324672	1e-06	0.029297	-9	0.195511	-0.438963	0.00212246	0.112105	-44.5067	0.193642	-0.387804	1e-06	0.102347	-41.7156
1.79336	2.01768	2.90909	0.1979	-0.35926	0.0015908	0.0962041	-28.5871	0.214533	-0.331791	1e-06	0.0292888	-9	0.195001	-0.440442	0.00188851	0.112134	-44.6398	0.193191	-0.388839	1e-06	0.102449	-41.7679
1.79452	2.01865	2.90827	0.198926	-0.360185	0.0016357	0.0962109	-28.6498	0.214144	-0.3389	1e-06	0.0292765	-9	0.194489	-0.441906	0.00165311	0.112159	-44.7716	0.192738	-0.389851	1e-06	0.102548	-41.8185
1.79568	2.01965	2.90742	0.198633	-0.362689	0.00167413	0.0961794	-28.6925	0.213747	-0.345994	1e-06	0.02926	-9	0.193976	-0.443356	0.00141624	0.11218	-44.9021	0.192284	-0.390839	1e-06	0.102642	-41.8674
1.79684	2.02068	2.90655	0.198047	-0.365334	0.00172242	0.0961454	-28.7316	0.213342	-0.353072	1e-06	0.0292396	-9	0.193461	-0.444793	0.00117789	0.112197	-45.0314	0.191829	-0.391805	1e-06	0.102732	-41.9146
1.798	2.02172	2.90566	0.196875	-0.367801	0.00178992	0.0961318	-28.7729	0.212928	-0.360128	1e-06	0.0292152	-9	0.192944	-0.446217	0.00093803	0.112209	-45.1595	0.191373	-0.392747	1e-06	0.102819	-41.9601
1.79916	2.0228	2.90475	0.197168	-0.369452	0.00184263	0.0961086	-28.8197	0.212506	-0.367158	1e-06	0.0291869	-9	0.192426	-0.447628	0.00069664	0.112217	-45.2865	0.190916	-0.393667	1e-06	0.102902	-42.0039
1.80032	2.0239	2.90382	0.196729	-0.371893	0.00189688	0.096092	-28.8658	0.212076	-0.37416	1e-06	0.0291548	-9	0.191906	-0.449026	0.000453697	0.11222	-45.4123	0.190458	-0.394565	1e-06	0.102981	-42.0461
1.80148	2.02502	2.90286	0.196436	-0.374325	0.00194035	0.0960415	-28.9056	0.211638	-0.381129	1e-06	0.029119	-9	0.191384	-0.450412	0.00020918	0.11222	-45.5371	0.189999	-0.39544	1e-06	0.103056	-42.0867
1.80264	2.02618	2.90189	0.195996	-0.376912	0.00197619	0.0959488	-28.934	0.211192	-0.388063	1e-06	0.0290796	-9	0.190861	-0.451787	1e-06	0.112215	-45.6608	0.189538	-0.396293	1e-06	0.103128	-42.1256
1.8038	2.02735	2.90089	0.195996	-0.379496	0.00200987	0.0958423	-28.9611	0.210738	-0.394957	1e-06	0.0290366	-9	0.190336	-0.45298	1e-06	0.112207	-45.7682	0.189077	-0.397125	1e-06	0.103196	-42.163
1.80496	2.02855	2.89987	0.194824	-0.382563	0.00206081	0.0957497	-28.989	0.210276	-0.401808	1e-06	0.0289902	-9	0.18981	-0.45394	1e-06	0.112195	-45.8546	0.188615	-0.397935	1e-06	0.103261	-42.1988
1.80612	2.02978	2.89883	0.194531	-0.384832	0.00209807	0.0956493	-29.0267	0.209806	-0.408613	1e-06	0.0289403	-9	0.189283	-0.454706	1e-06	0.11218	-45.9236	0.188152	-0.398723	1e-06	0.103322	-42.2331
1.80728	2.03103	2.89777	0.193066	-0.387269	0.00212403	0.0955393	-29.0679	0.209328	-0.41537	1e-06	0.0288873	-9	0.188755	-0.455314	1e-06	0.112162	-45.9783	0.187688	-0.399491	1e-06	0.103379	-42.2659
1.80844	2.0323	2.89669	0.193506	-0.388595	0.00216351	0.0954306	-29.1059	0.208842	-0.422073	1e-06	0.028831	-9	0.188226	-0.455791	1e-06	0.112141	-46.0212	0.187223	-0.400238	1e-06	0.103433	-42.2971
1.8096	2.0336	2.89559	0.193359	-0.390895	0.00219488	0.0952772	-29.1258	0.208348	-0.428722	1e-06	0.0287716	-9	0.187698	-0.456159	1e-06	0.112118	-46.0543	0.186758	-0.400963	1e-06	0.103484	-42.3269
1.81076	2.03493	2.89446	0.19248	-0.393531	0.00222359	0.0951029	-29.1408	0.207847	-0.435312	1e-06	0.0287092	-9	0.187168	-0.456436	1e-06	0.112093	-46.0793	0.186291	-0.401669	1e-06	0.103531	-42.3551
1.81192	2.03628	2.89332	0.192188	-0.395704	0.0022644	0.0949363	-29.1575	0.207339	-0.441842	1e-06	0.028644	-9	0.186639	-0.456638	1e-06	0.112065	-46.0975	0.185824	-0.402354	1e-06	0.103575	-42.3819
1.81308	2.03765	2.89215	0.191309	-0.39806	0.00229489	0.0947615	-29.1778	0.206822	-0.448307	1e-06	0.0285759	-9	0.186109	-0.456778	1e-06	0.112035	-46.11	0.185356	-0.403019	1e-06	0.103616	-42.4073
1.81424	2.03905	2.89096	0.190723	-0.399958	0.0023151	0.0945769	-29.2021	0.206299	-0.454706	1e-06	0.0285051	-9	0.185579	-0.456865	1e-06	0.112004	-46.1178	0.184887	-0.403664	1e-06	0.103653	-42.4313
1.8154	2.04048	2.88976	0.190576	-0.401724	0.00234599	0.0943984	-29.2242	0.205767	-0.461037	1e-06	0.0284317	-9	0.185049	-0.456907	1e-06	0.111971	-46.1217	0.184418	-0.40429	1e-06	0.103688	-42.4538
1.81656	2.04192	2.88853	0.190137	-0.403839	0.00236743	0.0941771	-29.2331	0.205229	-0.467296	1e-06	0.0283558	-9	0.184519	-0.456912	1e-06	0.111935	-46.1221	0.183948	-0.404896	1e-06	0.103719	-42.475
1.81772	2.0434	2.88728	0.189697	-0.405985	0.00238722	0.0939351	-29.2363	0.204683	-0.473481	1e-06	0.0282774	-9	0.183989	-0.456885	1e-06	0.111898	-46.1196	0.183477	-0.405483	1e-06	0.103747	-42.4948
1.81888	2.04489	2.88601	0.188818	-0.408167	0.00241699	0.0936976	-29.2389	0.204131	-0.47959	1e-06	0.0281968	-9	0.183459	-0.45683	1e-06	0.11186	-46.1147	0.183005	-0.406051	1e-06	0.103772	-42.5132
1.82004	2.04641	2.88472	0.188525	-0.409904	0.00245445	0.0934582	-29.2397	0.203571	-0.485621	1e-06	0.0281139	-9	0.182929	-0.456751	1e-06	0.111819	-46.1076	0.182533	-0.4066	1e-06	0.103794	-42.5303
1.8212	2.04796	2.88341	0.188818	-0.411841	0.00247874	0.0932066	-29.2421	0.203004	-0.491572	1e-06	0.0280288	-9	0.182399	-0.456652	1e-06	0.111777	-46.0986	0.18206	-0.407131	1e-06	0.103813	-42.546
1.82236	2.04953	2.88208	0.187061	-0.414622	0.00251236	0.092964	-29.2452	0.20243	-0.49744	1e-06	0.0279418	-9	0.18187	-0.456534	1e-06	0.111733	-46.088	0.181587	-0.407643	1e-06	0.103828	-42.5605
1.82352	2.05112	2.88073	0.186914	-0.416005	0.0025383	0.0926829	-29.2431	0.20185	-0.503225	1e-06	0.0278527	-9	0.18134	-0.456399	1e-06	0.111688	-46.0759	0.181113	-0.408137	1e-06	0.103841	-42.5736
1.82468	2.05273	2.87936	0.187793	-0.417756	0.00255892	0.0923768	-29.2319	0.201263	-0.508923	1e-06	0.0277618	-9	0.180811	-0.456251	1e-06	0.111641	-46.0625	0.180638	-0.408612	1e-06	0.103851	-42.5855
1.82584	2.05437	2.87797	0.185449	-0.421	0.00258277	0.0920672	-29.2185	0.200669	-0.514534	1e-06	0.0276692	-9	0.180282	-0.456088	1e-06	0.111592	-46.048	0.180163	-0.40907	1e-06	0.103859	-42.5961
1.827	2.05604	2.87656	0.185156	-0.422213	0.00262073	0.0917784	-29.2168	0.200069	-0.520055	1e-06	0.0275749	-9	0.179753	-0.455914	1e-06	0.111541	-46.0323	0.179688	-0.409511	1e-06	0.103863	-42.6054
1.82816	2.05773	2.87513	0.184717	-0.423641	0.00264185	0.0914767	-29.2161	0.199463	-0.525485	1e-06	0.027479	-9	0.179224	-0.455728	1e-06	0.11149	-46.0155	0.179212	-0.409934	1e-06	0.103864	-42.6135
1.82932	2.05944	2.87368	0.184131	-0.425126	0.00266863	0.0911834	-29.2156	0.19885	-0.530823	1e-06	0.0273816	-9	0.178695	-0.455532	1e-06	0.111436	-45.9979	0.178735	-0.41034	1e-06	0.103863	-42.6204
1.83048	2.06117	2.87221	0.183691	-0.426509	0.0027135	0.0908843	-29.2038	0.198231	-0.536067	1e-06	0.0272828	-9	0.178167	-0.455326	1e-06	0.111381	-45.9793	0.178258	-0.410728	1e-06	0.103859	-42.626
1.83164	2.06293	2.87071	0.183252	-0.427953	0.0027525	0.0905563	-29.1826	0.197606	-0.541216	1e-06	0.0271826	-9	0.177639	-0.45511	1e-06	0.111324	-45.9599	0.177781	-0.4111	1e-06	0.103852	-42.6305
1.8328	2.06471	2.8692	0.18252	-0.42946	0.00278954	0.0902186	-29.1584	0.196976	-0.546269	1e-06	0.0270813	-9	0.177111	-0.454886	1e-06	0.111266	-45.9397	0.177303	-0.411455	1e-06	0.103843	-42.6337
1.83396	2.06651	2.86767	0.18208	-0.43071	0.00284174	0.0898971	-29.134	0.196339	-0.551224	1e-06	0.0269787	-9	0.176584	-0.454652	1e-06	0.111206	-45.9187	0.176825	-0.411794	1e-06	0.103831	-42.6358
1.83512	2.06834	2.86612	0.181641	-0.432026	0.0028766	0.089561	-29.1114	0.195697	-0.556081	1e-06	0.0268751	-9	0.176056	-0.454411	1e-06	0.111144	-45.897	0.176346	-0.412116	1e-06	0.103816	-42.6367
1.83628	2.07019	2.86456	0.181348	-0.433409	0.00291122	0.0892286	-29.0903	0.195049	-0.560838	1e-06	0.0267705	-9	0.175529	-0.454161	1e-06	0.111081	-45.8745	0.175867	-0.412422	1e-06	0.103799	-42.6365
1.83744	2.07206	2.86297	0.180615	-0.435022	0.00296036	0.0888956	-29.0622	0.194396	-0.565495	1e-06	0.0266649	-9	0.175003	-0.453903	1e-06	0.111017	-45.8513	0.175388	-0.412712	1e-06	0.103779	-42.6351
1.8386	2.07396	2.86136	0.180176	-0.436386	0.00300395	0.0885313	-29.0259	0.193737	-0.570051	1e-06	0.0265585	-9	0.174476	-0.453637	1e-06	0.11095	-45.8273	0.174909	-0.412987	1e-06	0.103756	-42.6327
1.83976	2.07587	2.85973	0.179443	-0.437823	0.0030459	0.0881546	-28.986	0.193073	-0.574504	1e-06	0.0264513	-9	0.17395	-0.453363	1e-06	0.110883	-45.8027	0.174429	-0.413245	1e-06	0.103731	-42.6291
1.84092	2.07781	2.85809	0.179004	-0.439014	0.00309713	0.0877876	-28.9467	0.192404	-0.578854	1e-06	0.0263433	-9	0.173425	-0.453082	1e-06	0.110813	-45.7774	0.173949	-0.413488	1e-06	0.103704	-42.6243
1.84208	2.07978	2.85642	0.178125	-0.440281	0.0031298	0.0874057	-28.9103	0.19173	-0.583101	1e-06	0.0262348	-9	0.172899	-0.452793	1e-06	0.110742	-45.7514	0.173468	-0.413716	1e-06	0.103674	-42.6185
1.84324	2.08176	2.85474	0.177246	-0.441145	0.00315093	0.0870202	-28.8786	0.191052	-0.587244	1e-06	0.0261256	-9	0.172374	-0.452497	1e-06	0.11067	-45.7248	0.172987	-0.413929	1e-06	0.103641	-42.6117
1.8444	2.08377	2.85304	0.177246	-0.441608	0.00318301	0.0866373	-28.8409	0.190368	-0.591283	1e-06	0.0260159	-9	0.171849	-0.452194	1e-06	0.110596	-45.6974	0.172507	-0.414127	1e-06	0.103606	-42.6037
1.84556	2.0858	2.85132	0.17666	-0.442631	0.00323693	0.0862382	-28.7819	0.18968	-0.595216	1e-06	0.0259058	-9	0.171325	-0.451883	1e-06	0.11052	-45.6694	0.172025	-0.41431	1e-06	0.103569	-42.5947
1.84672	2.08785	2.84958	0.176221	-0.443575	0.00328952	0.0858269	-28.7182	0.188987	-0.599044	1e-06	0.0257953	-9	0.170801	-0.451564	1e-06	0.110443	-45.6408	0.171544	-0.414478	1e-06	0.103529	-42.5846
1.84788	2.08992	2.84782	0.175928	-0.444601	0.0033424	0.085413	-28.6525	0.18829	-0.602766	1e-06	0.0256844	-9	0.170277	-0.451238	1e-06	0.110364	-45.6115	0.171063	-0.414632	1e-06	0.103487	-42.5735
1.84904	2.09202	2.84604	0.175928	-0.445871	0.00337315	0.084982	-28.5906	0.187589	-0.606382	1e-06	0.0255732	-9	0.169754	-0.450905	1e-06	0.110284	-45.5815	0.170581	-0.414771	1e-06	0.103443	-42.5614
1.8502	2.09413	2.84425	0.175781	-0.447707	0.0033888	0.0845364	-28.5318	0.186883	-0.609892	1e-06	0.0254619	-9	0.169231	-0.450565	1e-06	0.110202	-45.5509	0.170099	-0.414896	1e-06	0.103396	-42.5482
1.85136	2.09627	2.84243	0.174023	-0.449951	0.00341338	0.0840967	-28.4761	0.186174	-0.613295	1e-06	0.0253503	-9	0.168709	-0.450218	1e-06	0.110118	-45.5196	0.169617	-0.415007	1e-06	0.103347	-42.5341
1.85252	2.09843	2.8406	0.173291	-0.450843	0.00345699	0.0836583	-28.4194	0.185461	-0.616591	1e-06	0.0252386	-9	0.168187	-0.449863	1e-06	0.110033	-45.4877	0.169135	-0.415105	1e-06	0.103296	-42.5189
1.85368	2.10061	2.83875	0.172998	-0.451505	0.003498	0.08321	-28.3597	0.184743	-0.61978	1e-06	0.0251269	-9	0.167665	-0.449501	1e-06	0.109947	-45.4551	0.168653	-0.415188	1e-06	0.103243	-42.5027
1.85484	2.10281	2.83688	0.172266	-0.45242	0.00354033	0.0827603	-28.2975	0.184023	-0.622863	1e-06	0.0250151	-9	0.167144	-0.449132	1e-06	0.109859	-45.4219	0.168171	-0.415258	1e-06	0.103187	-42.4856
1.856	2.10504	2.835	0.171826	-0.453107	0.00356235	0.0822925	-28.2381	0.183298	-0.625839	1e-06	0.0249033	-9	0.166623	-0.448756	1e-06	0.109769	-45.3881	0.167689	-0.415314	1e-06	0.103129	-42.4675
1.85716	2.10728	2.8331	0.171826	-0.453889	0.00356485	0.0818075	-28.1804	0.182571	-0.628708	1e-06	0.0247916	-9	0.166103	-0.448373	1e-06	0.109678	-45.3536	0.167206	-0.415357	1e-06	0.103069	-42.4484
1.85832	2.10954	2.83117	0.170801	-0.455247	0.00357418	0.0813295	-28.1221	0.18184	-0.63147	1e-06	0.02468	-9	0.165583	-0.447983	1e-06	0.109585	-45.3184	0.166724	-0.415387	1e-06	0.103006	-42.4284
1.85948	2.11183	2.82924	0.170947	-0.456061	0.00360042	0.0808541	-28.0602	0.181106	-0.634126	1e-06	0.0245685	-9	0.165064	-0.447585	1e-06	0.109491	-45.2827	0.166241	-0.415404	1e-06	0.102942	-42.4074
1.86064	2.11414	2.82728	0.169629	-0.457614	0.00362192	0.0803658	-27.9957	0.180369	-0.636675	1e-06	0.0244573	-9	0.164545	-0.44718	1e-06	0.109395	-45.2462	0.165759	-0.415408	1e-06	0.102875	-42.3855
1.8618	2.11646	2.82531	0.169189	-0.458306	0.00364335	0.0798742	-27.9351	0.179629	-0.639118	1e-06	0.0243462	-9	0.164026	-0.446769	1e-06	0.109298	-45.2092	0.165277	-0.415399	1e-06	0.102806	-42.3627
1.86296	2.11881	2.82332	0.168311	-0.459098	0.00367558	0.0793747	-27.866	0.178886	-0.641455	1e-06	0.0242353	-9	0.163508	-0.44635	1e-06	0.109199	-45.1715	0.164794	-0.415377	1e-06	0.102735	-42.3389
1.86412	2.12118	2.82131	0.167285	-0.459511	0.00368766	0.0788574	-27.8004	0.178141	-0.643686	1e-06	0.0241248	-9	0.162991	-0.445924	1e-06	0.109098	-45.1332	0.164312	-0.415343	1e-06	0.102662	-42.3142
1.86528	2.12356	2.81928	0.168018	-0.459385	0.00370131	0.0783465	-27.7354	0.177393	-0.645812	1e-06	0.0240146	-9	0.162474	-0.445491	1e-06	0.108996	-45.0942	0.16383	-0.415296	1e-06	0.102587	-42.2886
1.86644	2.12597	2.81724	0.166699	-0.460644	0.00373204	0.0778398	-27.6596	0.176642	-0.647832	1e-06	0.0239047	-9	0.161957	-0.445051	1e-06	0.108893	-45.0546	0.163348	-0.415237	1e-06	0.10251	-42.2621
1.8676	2.1284	2.81518	0.166406	-0.461045	0.0037884	0.0773327	-27.5754	0.17589	-0.649748	1e-06	0.0237951	-9	0.161441	-0.444604	1e-06	0.108788	-45.0143	0.162865	-0.415166	1e-06	0.102431	-42.2348
1.86876	2.13085	2.81311	0.165674	-0.461711	0.00384413	0.0768207	-27.4887	0.175135	-0.651559	1e-06	0.023686	-9	0.160926	-0.44415	1e-06	0.108681	-44.9735	0.162383	-0.415082	1e-06	0.10235	-42.2065
1.86992	2.13331	2.81102	0.165088	-0.462161	0.00390084	0.0763109	-27.4037	0.174378	-0.653266	1e-06	0.0235773	-9	0.160411	-0.443689	1e-06	0.108573	-44.932	0.161902	-0.414987	1e-06	0.102267	-42.1774
1.87108	2.1358	2.80891	0.164502	-0.462557	0.0039377	0.0757825	-27.3207	0.173619	-0.654869	1e-06	0.0234691	-9	0.159896	-0.44322	1e-06	0.108464	-44.8898	0.16142	-0.41488	1e-06	0.102182	-42.1474
1.87224	2.1383	2.80678	0.164062	-0.462899	0.00397333	0.0752566	-27.2393	0.172859	-0.656369	1e-06	0.0233613	-9	0.159382	-0.442745	1e-06	0.108353	-44.8471	0.160938	-0.414761	1e-06	0.102095	-42.1165
1.8734	2.14083	2.80464	0.163623	-0.463347	0.00402097	0.0747364	-27.154	0.172097	-0.657766	1e-06	0.023254	-9	0.158869	-0.442263	1e-06	0.10824	-44.8037	0.160457	-0.414631	1e-06	0.102006	-42.0848
1.87456	2.14337	2.80248	0.163477	-0.463903	0.00409306	0.0742343	-27.0648	0.171333	-0.659061	1e-06	0.0231472	-9	0.158356	-0.441774	1e-06	0.108126	-44.7597	0.159975	-0.414489	1e-06	0.101915	-42.0522
1.87572	2.14593	2.80031	0.162451	-0.464887	0.00416335	0.0737265	-26.9755	0.170568	-0.660254	1e-06	0.023041	-9	0.157844	-0.441278	1e-06	0.10801	-44.715	0.159494	-0.414335	1e-06	0.101822	-42.0188
1.87688	2.14852	2.79812	0.162012	-0.46534	0.00423349	0.0732194	-26.8908	0.169801	-0.661346	1e-06	0.0229353	-9	0.157333	-0.440775	1e-06	0.107893	-44.6697	0.159013	-0.414171	1e-06	0.101727	-41.9846
1.87804	2.15112	2.79592	0.160107	-0.465902	0.00428186	0.072692	-26.8097	0.169033	-0.662337	1e-06	0.0228302	-9	0.156822	-0.440265	1e-06	0.107774	-44.6238	0.158532	-0.413995	1e-06	0.10163	-41.9495
1.8792	2.15373	2.7937	0.159961	-0.464971	0.00432635	0.072164	-26.7322	0.168265	-0.663228	1e-06	0.0227256	-9	0.156311	-0.439748	1e-06	0.107654	-44.5773	0.158052	-0.413808	1e-06	0.101531	-41.9136
1.88036	2.15637	2.79146	0.159668	-0.464471	0.00437942	0.0716423	-26.6465	0.167495	-0.664019	1e-06	0.0226217	-9	0.155801	-0.439224	1e-06	0.107532	-44.5301	0.157572	-0.41361	1e-06	0.101431	-41.8769
1.88152	2.15903	2.78921	0.159668	-0.46424	0.00445274	0.0711364	-26.5533	0.166724	-0.664711	1e-06	0.0225184	-9	0.155292	-0.438693	1e-06	0.107409	-44.4824	0.157091	-0.413401	1e-06	0.101328	-41.8394
1.88268	2.1617	2.78694	0.159082	-0.464597	0.00452705	0.0706271	-26.4562	0.165953	-0.665305	1e-06	0.0224157	-9	0.154784	-0.438155	1e-06	0.107284	-44.434	0.156612	-0.413182	1e-06	0.101224	-41.8011
1.88384	2.16439	2.78466	0.158643	-0.464904	0.00460244	0.070116	-26.3594	0.165181	-0.665801	1e-06	0.0223136	-9	0.154276	-0.437611	1e-06	0.107158	-44.385	0.156132	-0.412952	1e-06	0.101118	-41.762
1.885	2.1671	2.78236	0.157764	-0.46532	0.00465034	0.0695816	-26.268	0.164408	-0.666199	1e-06	0.0222122	-9	0.153768	-0.437059	1e-06	0.107031	-44.3353	0.155653	-0.412711	1e-06	0.10101	-41.7221
1.88616	2.16982	2.78005	0.156006	-0.465364	0.0046894	0.0690417	-26.1811	0.163635	-0.666501	1e-06	0.0221115	-9	0.153262	-0.436501	1e-06	0.106902	-44.2851	0.155174	-0.412459	1e-06	0.100901	-41.6814
1.88732	2.17257	2.77772	0.157178	-0.464076	0.00473594	0.0685097	-26.094	0.162862	-0.666707	1e-06	0.0220114	-9	0.152756	-0.435936	1e-06	0.106771	-44.2342	0.154695	-0.412198	1e-06	0.100789	-41.6399
1.88848	2.17533	2.77538	0.156006	-0.464659	0.00480319	0.0679941	-25.996	0.162088	-0.666818	1e-06	0.021912	-9	0.15225	-0.435364	1e-06	0.106639	-44.1827	0.154217	-0.411925	1e-06	0.100676	-41.5977
1.88964	2.17811	2.77302	0.155566	-0.46455	0.00489745	0.0674967	-25.8962	0.161315	-0.666834	1e-06	0.0218133	-9	0.151746	-0.434785	1e-06	0.106505	-44.1306	0.153739	-0.411643	1e-06	0.100561	-41.5547
1.8908	2.1809	2.77065	0.15498	-0.464549	0.00499248	0.0669997	-25.7962	0.160541	-0.666756	1e-06	0.0217153	-9	0.151242	-0.434199	1e-06	0.10637	-44.0779	0.153261	-0.411351	1e-06	0.100444	-41.5109
1.89196	2.18372	2.76826	0.154248	-0.464497	0.00505354	0.0664693	-25.6998	0.159768	-0.666585	1e-06	0.021618	-9	0.150738	-0.433607	1e-06	0.106234	-44.0246	0.152784	-0.411048	1e-06	0.100325	-41.4664
1.89312	2.18655	2.76586	0.154102	-0.464233	0.00509387	0.0659186	-25.606	0.158995	-0.666321	1e-06	0.0215214	-9	0.150236	-0.433007	1e-06	0.106096	-43.9706	0.152307	-0.410736	1e-06	0.100205	-41.4211
1.89428	2.18939	2.76345	0.152197	-0.464398	0.00513756	0.0653726	-25.5121	0.158222	-0.665965	1e-06	0.0214255	-9	0.149734	-0.432401	1e-06	0.105956	-43.9161	0.15183	-0.410413	1e-06	0.100083	-41.375
1.89544	2.19226	2.76102	0.154248	-0.463069	0.00519549	0.0648429	-25.4203	0.15745	-0.665517	1e-06	0.0213303	-9	0.149232	-0.431788	1e-06	0.105815	-43.8609	0.151354	-0.410081	1e-06	0.0999593	-41.3283
1.8966	2.19513	2.75858	0.152197	-0.464572	0.00528247	0.0643397	-25.3187	0.156678	-0.66498	1e-06	0.0212359	-9	0.148732	-0.431169	1e-06	0.105673	-43.8052	0.150878	-0.409739	1e-06	0.0998338	-41.2807
1.89776	2.19803	2.75612	0.151611	-0.46442	0.00536839	0.0638353	-25.2281	0.155907	-0.664352	1e-06	0.0211422	-9	0.148232	-0.430542	1e-06	0.105529	-43.7488	0.150403	-0.409387	1e-06	0.0997067	-41.2325
1.89892	2.20094	2.75366	0.150732	-0.464217	0.00542391	0.0632996	-25.1404	0.155137	-0.663635	1e-06	0.0210492	-9	0.147733	-0.429909	1e-06	0.105383	-43.6918	0.149928	-0.409026	1e-06	0.0995778	-41.1835
1.90008	2.20387	2.75117	0.150293	-0.463641	0.00545919	0.0627428	-25.055	0.154368	-0.662829	1e-06	0.0209569	-9	0.147235	-0.429269	1e-06	0.105237	-43.6342	0.149453	-0.408656	1e-06	0.0994473	-41.1338
1.90124	2.20681	2.74868	0.149707	-0.463172	0.00549362	0.0621874	-24.9695	0.153599	-0.661935	1e-06	0.0208653	-9	0.146737	-0.428623	1e-06	0.105088	-43.5761	0.148979	-0.408276	1e-06	0.0993151	-41.0834
1.9024	2.20977	2.74617	0.149268	-0.462651	0.00553966	0.0616458	-24.8838	0.152832	-0.660955	1e-06	0.0207745	-9	0.14624	-0.42797	1e-06	0.104939	-43.5173	0.148505	-0.407886	1e-06	0.0991813	-41.0323
1.90356	2.21274	2.74365	0.148682	-0.462236	0.00561131	0.0611298	-24.7957	0.152066	-0.659888	1e-06	0.0206845	-9	0.145744	-0.42731	1e-06	0.104788	-43.4579	0.148032	-0.407487	1e-06	0.0990458	-40.9804
1.90472	2.21573	2.74111	0.148242	-0.461766	0.00569006	0.060617	-24.7059	0.151301	-0.658735	1e-06	0.0205951	-9	0.145249	-0.426643	1e-06	0.104635	-43.3979	0.147559	-0.40708	1e-06	0.0989087	-40.9279
1.90588	2.21873	2.73856	0.147363	-0.461402	0.00574502	0.060075	-24.6162	0.150538	-0.657497	1e-06	0.0205065	-9	0.144754	-0.42597	1e-06	0.104481	-43.3373	0.147087	-0.406663	1e-06	0.09877	-40.8746
1.90704	2.22175	2.736	0.14707	-0.460661	0.00577627	0.0595093	-24.5296	0.149776	-0.656175	1e-06	0.0204187	-9	0.144261	-0.42529	1e-06	0.104326	-43.2761	0.146615	-0.406236	1e-06	0.0986296	-40.8207
1.9082	2.22479	2.73343	0.146338	-0.460185	0.00580553	0.0589424	-24.4426	0.149015	-0.654769	1e-06	0.0203315	-9	0.143768	-0.424604	1e-06	0.104169	-43.2144	0.146144	-0.405801	1e-06	0.0984877	-40.7661
1.90936	2.22784	2.73084	0.145898	-0.459492	0.00584214	0.0583853	-24.3569	0.148257	-0.65328	1e-06	0.0202451	-9	0.143276	-0.423911	1e-06	0.104011	-43.152	0.145673	-0.405357	1e-06	0.0983441	-40.7108
1.91052	2.2309	2.72825	0.145313	-0.4589	0.00589932	0.0578512	-24.2705	0.1475	-0.651709	1e-06	0.0201595	-9	0.142784	-0.423212	1e-06	0.103851	-43.089	0.145203	-0.404904	1e-06	0.098199	-40.6548
1.91168	2.23397	2.72564	0.143848	-0.458251	0.00598722	0.0573479	-24.1824	0.146745	-0.650056	1e-06	0.0200745	-9	0.142294	-0.422505	1e-06	0.10369	-43.0255	0.144733	-0.404443	1e-06	0.0980522	-40.5981
1.91284	2.23707	2.72301	0.143994	-0.456579	0.00607572	0.0568453	-24.0948	0.145992	-0.648323	1e-06	0.0199903	-9	0.141804	-0.421793	1e-06	0.103527	-42.9613	0.144264	-0.403972	1e-06	0.0979039	-40.5407
1.914	2.24017	2.72038	0.142676	-0.455648	0.00613085	0.0563088	-24.0042	0.145241	-0.646509	1e-06	0.0199068	-9	0.141315	-0.421073	1e-06	0.103363	-42.8966	0.143796	-0.403493	1e-06	0.0977541	-40.4827
1.91516	2.24329	2.71774	0.141943	-0.453852	0.00618058	0.0557678	-23.9136	0.144492	-0.644616	1e-06	0.0198241	-9	0.140827	-0.420348	1e-06	0.103198	-42.8313	0.143328	-0.403006	1e-06	0.0976027	-40.424
1.91632	2.24642	2.71508	0.142383	-0.451832	0.0062327	0.0552348	-23.8194	0.143745	-0.642645	1e-06	0.0197421	-9	0.14034	-0.419615	1e-06	0.103031	-42.7654	0.14286	-0.40251	1e-06	0.0974497	-40.3647
1.91748	2.24957	2.71241	0.141943	-0.450865	0.00630125	0.0547216	-23.7183	0.143001	-0.640595	1e-06	0.0196607	-9	0.139854	-0.418877	1e-06	0.102863	-42.6989	0.142393	-0.402005	1e-06	0.0972953	-40.3047
1.91864	2.25273	2.70973	0.141357	-0.44999	0.00639714	0.0542376	-23.6155	0.142259	-0.638468	1e-06	0.0195801	-9	0.139368	-0.418131	1e-06	0.102693	-42.6318	0.141927	-0.401492	1e-06	0.0971392	-40.244
1.9198	2.2559	2.70704	0.141504	-0.449045	0.00649494	0.053755	-23.5126	0.14152	-0.636264	1e-06	0.0195003	-9	0.138884	-0.417094	1e-06	0.101882	-42.5385	0.141461	-0.40097	1e-06	0.0969817	-40.1827
1.92096	2.25908	2.70434	0.139893	-0.44883	0.00655989	0.0532399	-23.4126	0.140783	-0.633984	1e-06	0.0194211	-9	0.138401	-0.415556	1e-06	0.101078	-42.4	0.140996	-0.400441	1e-06	0.0968227	-40.1207
1.92212	2.26228	2.70163	0.139453	-0.447422	0.00661534	0.0527165	-23.3184	0.140049	-0.631629	1e-06	0.0193426	-9	0.13792	-0.413617	1e-06	0.100281	-42.2255	0.140532	-0.399903	1e-06	0.0966621	-40.0581
1.92328	2.26549	2.6989	0.139307	-0.446101	0.00667374	0.0521988	-23.2228	0.139318	-0.629199	1e-06	0.0192649	-9	0.137441	-0.411359	1e-06	0.0994924	-42.0223	0.140068	-0.399357	1e-06	0.0962439	-39.9104
1.92444	2.26872	2.69617	0.138574	-0.445185	0.00674834	0.0516993	-23.1252	0.138589	-0.626695	1e-06	0.0191878	-9	0.136966	-0.40885	1e-06	0.0987113	-41.7965	0.139605	-0.3987	1e-06	0.0955097	-39.6566
1.9256	2.27195	2.69342	0.138135	-0.444034	0.00684776	0.0512267	-23.0275	0.137864	-0.624118	1e-06	0.0191114	-9	0.136493	-0.406143	1e-06	0.0979381	-41.5529	0.139143	-0.397934	1e-06	0.0947812	-39.4027
1.92676	2.2752	2.69067	0.13667	-0.442965	0.00696438	0.0507618	-22.9242	0.137141	-0.621468	1e-06	0.0190357	-9	0.136023	-0.403283	1e-06	0.0971729	-41.2954	0.138681	-0.397064	1e-06	0.0940585	-39.1488
1.92792	2.27846	2.68791	0.137988	-0.440855	0.00705263	0.0502676	-22.8233	0.136422	-0.618746	1e-06	0.0189607	-9	0.135557	-0.400305	1e-06	0.0964156	-41.0274	0.138221	-0.396094	1e-06	0.0933415	-38.8951
1.92908	2.28173	2.68513	0.13623	-0.440748	0.00712192	0.0497582	-22.7198	0.135706	-0.615953	1e-06	0.0188864	-9	0.135095	-0.397238	1e-06	0.0956663	-40.7514	0.137762	-0.39503	1e-06	0.0926303	-38.6415
1.93024	2.28501	2.68235	0.135791	-0.439277	0.0071917	0.0492507	-22.6235	0.134993	-0.613089	1e-06	0.0188128	-9	0.134636	-0.394107	1e-06	0.0949249	-40.4696	0.137304	-0.393877	1e-06	0.0919249	-38.3882
1.9314	2.28831	2.67955	0.135205	-0.437882	0.00727293	0.0487585	-22.5264	0.134283	-0.610155	1e-06	0.0187398	-9	0.13418	-0.390929	1e-06	0.0941913	-40.1836	0.136848	-0.39264	1e-06	0.0912253	-38.1354
1.93256	2.29161	2.67675	0.134912	-0.436402	0.00737731	0.0482917	-22.4277	0.133577	-0.607151	1e-06	0.0186675	-9	0.133729	-0.387721	1e-06	0.0934653	-39.8949	0.136393	-0.391323	1e-06	0.0905315	-37.883
1.93372	2.29493	2.67394	0.134326	-0.435155	0.00751196	0.0478561	-22.3258	0.132875	-0.604079	1e-06	0.0185959	-9	0.133281	-0.384494	1e-06	0.0927469	-39.6045	0.135939	-0.38993	1e-06	0.0898435	-37.6311
1.93488	2.29826	2.67111	0.133301	-0.43382	0.00761351	0.0473897	-22.228	0.132176	-0.600938	1e-06	0.0185249	-9	0.132837	-0.381259	1e-06	0.092036	-39.3133	0.135488	-0.388466	1e-06	0.0891612	-37.3799
1.93604	2.30159	2.66828	0.133301	-0.431913	0.00768441	0.0468914	-22.1322	0.131481	-0.59773	1e-06	0.0184546	-9	0.132396	-0.378024	1e-06	0.0913325	-39.0222	0.135038	-0.386935	1e-06	0.0884846	-37.1293
1.9372	2.30494	2.66544	0.132715	-0.430555	0.00775421	0.0463921	-22.0335	0.130789	-0.594456	1e-06	0.0183849	-9	0.13196	-0.374795	1e-06	0.0906361	-38.7315	0.13459	-0.38534	1e-06	0.0878138	-36.8795
1.93836	2.3083	2.66259	0.132129	-0.429101	0.0078315	0.0459029	-21.9356	0.130102	-0.591114	1e-06	0.0183159	-9	0.131527	-0.371576	1e-06	0.0899469	-38.4419	0.134144	-0.383686	1e-06	0.0871487	-36.6305
1.93952	2.31167	2.65974	0.131543	-0.427552	0.00792725	0.0454355	-21.8376	0.129418	-0.587708	1e-06	0.0182475	-9	0.131098	-0.368373	1e-06	0.0892645	-38.1536	0.133699	-0.381975	1e-06	0.0864892	-36.3823
1.94068	2.31505	2.65687	0.131104	-0.425903	0.00805395	0.0449987	-21.7365	0.128738	-0.584236	1e-06	0.0181797	-9	0.130672	-0.365188	1e-06	0.0885891	-37.8669	0.133257	-0.380211	1e-06	0.0858354	-36.1351
1.94184	2.31844	2.654	0.130371	-0.424315	0.00814979	0.0445323	-21.6376	0.128062	-0.580699	1e-06	0.0181126	-9	0.13025	-0.362023	1e-06	0.0879203	-37.5821	0.132817	-0.378398	1e-06	0.0851872	-35.8888
1.943	2.32184	2.65111	0.130078	-0.422464	0.00821335	0.0440341	-21.5411	0.127391	-0.577099	1e-06	0.0180461	-9	0.129832	-0.358881	1e-06	0.087258	-37.2993	0.132379	-0.376538	1e-06	0.0845445	-35.6434
1.94416	2.32525	2.64822	0.129492	-0.420828	0.00827415	0.0435321	-21.4426	0.126724	-0.573436	1e-06	0.0179802	-9	0.129418	-0.355762	1e-06	0.0866022	-37.0186	0.131943	-0.374634	1e-06	0.0839073	-35.3991
1.94532	2.32866	2.64532	0.12876	-0.419085	0.00834077	0.0430365	-21.3438	0.126061	-0.569709	1e-06	0.0179149	-9	0.129007	-0.352668	1e-06	0.0859528	-36.7401	0.131509	-0.372689	1e-06	0.0832755	-35.1559
1.94648	2.33209	2.64242	0.128467	-0.417073	0.00842185	0.0425592	-21.2446	0.125402	-0.565921	1e-06	0.0178503	-9	0.1286	-0.3496	1e-06	0.0853095	-36.464	0.131078	-0.370706	1e-06	0.0826492	-34.9138
1.94764	2.33553	2.6395	0.128613	-0.41527	0.00852831	0.0421095	-21.1422	0.124748	-0.562071	1e-06	0.0177862	-9	0.128196	-0.346558	1e-06	0.0846723	-36.1902	0.130649	-0.368688	1e-06	0.0820283	-34.6728
1.9488	2.33897	2.63658	0.128027	-0.414154	0.00864093	0.0416629	-21.0374	0.124098	-0.558161	1e-06	0.0177227	-9	0.127796	-0.343542	1e-06	0.084041	-35.9187	0.130222	-0.366636	1e-06	0.0814126	-34.4329
1.94996	2.34242	2.63365	0.126709	-0.412923	0.00871957	0.0411848	-20.9398	0.123453	-0.554189	1e-06	0.0176598	-9	0.127399	-0.340552	1e-06	0.0834156	-35.6497	0.129798	-0.364553	1e-06	0.0808023	-34.1942
1.95112	2.34588	2.63072	0.126855	-0.410773	0.00878136	0.0406931	-20.8479	0.122812	-0.550158	1e-06	0.0175975	-9	0.127006	-0.337589	1e-06	0.0827959	-35.383	0.129376	-0.362442	1e-06	0.0801971	-33.9568
1.95228	2.34935	2.62778	0.12583	-0.409305	0.00884731	0.040205	-20.7532	0.122176	-0.546068	1e-06	0.0175358	-9	0.126616	-0.334652	1e-06	0.0821818	-35.1187	0.128957	-0.360304	1e-06	0.0795971	-33.7205
1.95344	2.35283	2.62483	0.12583	-0.407234	0.00892524	0.0397308	-20.6604	0.121545	-0.541919	1e-06	0.0174747	-9	0.126229	-0.331741	1e-06	0.0815732	-34.8567	0.12854	-0.358142	1e-06	0.0790021	-33.4855
1.9546	2.35631	2.62187	0.124805	-0.40568	0.00902456	0.0392814	-20.5658	0.120919	-0.537712	1e-06	0.0174141	-9	0.125846	-0.328856	1e-06	0.08097	-34.5971	0.128126	-0.355958	1e-06	0.0784122	-33.2517
1.95576	2.35981	2.61891	0.124219	-0.40352	0.00915468	0.0388494	-20.4651	0.120298	-0.533447	1e-06	0.0173541	-9	0.125466	-0.325997	1e-06	0.0803721	-34.3397	0.127714	-0.353753	1e-06	0.0778273	-33.0192
1.95692	2.36331	2.61594	0.125098	-0.40123	0.0092538	0.0383884	-20.366	0.119682	-0.529126	1e-06	0.0172947	-9	0.12509	-0.323163	1e-06	0.0797794	-34.0847	0.127305	-0.351529	1e-06	0.0772473	-32.788
1.95808	2.36681	2.61297	0.121875	-0.400411	0.0093321	0.037908	-20.2668	0.11907	-0.524747	1e-06	0.0172358	-9	0.124716	-0.320354	1e-06	0.0791918	-33.8319	0.126898	-0.349288	1e-06	0.0766722	-32.5581
1.95924	2.37033	2.60998	0.12334	-0.396574	0.00941215	0.0374284	-20.174	0.118464	-0.520313	1e-06	0.0171775	-9	0.124346	-0.31757	1e-06	0.0786092	-33.5813	0.126494	-0.347031	1e-06	0.0761019	-32.3295
1.9604	2.37385	2.607	0.122314	-0.394843	0.00950336	0.0369614	-20.0697	0.117863	-0.515823	1e-06	0.0171197	-9	0.12398	-0.31481	1e-06	0.0780315	-33.3329	0.126093	-0.34476	1e-06	0.0755363	-32.1022
1.96156	2.37738	2.60401	0.122021	-0.392492	0.00961358	0.0365174	-19.9671	0.117268	-0.511278	1e-06	0.0170624	-9	0.123616	-0.312074	1e-06	0.0774586	-33.0867	0.125694	-0.342477	1e-06	0.0749754	-31.8763
1.96272	2.38091	2.60101	0.121436	-0.390318	0.00974994	0.0361058	-19.8632	0.116677	-0.506679	1e-06	0.0170057	-9	0.123256	-0.309362	1e-06	0.0768904	-32.8426	0.125298	-0.340182	1e-06	0.0744192	-31.6516
1.96388	2.38445	2.59801	0.12085	-0.387999	0.00985914	0.0356679	-19.7611	0.116092	-0.502025	1e-06	0.0169495	-9	0.122898	-0.306672	1e-06	0.0763269	-32.6005	0.124905	-0.337878	1e-06	0.0738674	-31.4283
1.96504	2.388	2.595	0.120557	-0.38553	0.0099483	0.0352103	-19.6593	0.115512	-0.497319	1e-06	0.0168939	-9	0.122544	-0.304006	1e-06	0.075768	-32.3605	0.124514	-0.335565	1e-06	0.0733202	-31.2063
1.9662	2.39155	2.59198	0.119971	-0.383231	0.0100384	0.0347501	-19.5538	0.114938	-0.492559	1e-06	0.0168388	-9	0.122193	-0.301361	1e-06	0.0752135	-32.1225	0.124126	-0.333245	1e-06	0.0727775	-30.9856
1.96736	2.39511	2.58897	0.119531	-0.380777	0.0101367	0.0342983	-19.4469	0.11437	-0.487747	1e-06	0.0167841	-9	0.121845	-0.298739	1e-06	0.0746634	-31.8865	0.123741	-0.330918	1e-06	0.0722391	-30.7663
1.96852	2.39867	2.58594	0.119092	-0.378325	0.0102524	0.0338669	-19.3381	0.113807	-0.482883	1e-06	0.01673	-9	0.1215	-0.296138	1e-06	0.0741176	-31.6524	0.123359	-0.328586	1e-06	0.0717051	-30.5483
1.96968	2.40224	2.58291	0.118652	-0.375873	0.0103927	0.0334668	-19.2286	0.113249	-0.477967	1e-06	0.0166764	-9	0.121158	-0.293558	1e-06	0.073576	-31.4202	0.122979	-0.32625	1e-06	0.0711753	-30.3316
1.97084	2.40582	2.57988	0.118066	-0.373416	0.0105292	0.0330705	-19.1211	0.112698	-0.473001	1e-06	0.0166233	-9	0.120819	-0.290999	1e-06	0.0730386	-31.1899	0.122602	-0.323911	1e-06	0.0706497	-30.1162
1.972	2.4094	2.57685	0.117773	-0.370793	0.0106333	0.0326472	-19.0172	0.112152	-0.467955	1e-06	0.0165015	-9	0.120483	-0.288461	1e-06	0.0725053	-30.9615	0.122227	-0.321569	1e-06	0.0701283	-29.9022
1.97316	2.41298	2.57381	0.117188	-0.36832	0.0107253	0.0322126	-18.9125	0.111612	-0.46278	1e-06	0.0163614	-9	0.12015	-0.285943	1e-06	0.071976	-30.7348	0.121855	-0.319226	1e-06	0.0696109	-29.6895
1.97432	2.41657	2.57076	0.116748	-0.365673	0.0108247	0.0317825	-18.8049	0.111079	-0.457471	1e-06	0.016223	-9	0.119819	-0.283444	1e-06	0.0714507	-30.51	0.121486	-0.316882	1e-06	0.0690976	-29.4781
1.97548	2.42017	2.56771	0.11499	-0.363009	0.0109362	0.0313673	-18.6955	0.110551	-0.452031	1e-06	0.0160862	-9	0.119492	-0.280965	1e-06	0.0709292	-30.2868	0.12112	-0.314539	1e-06	0.0685883	-29.2681
1.97664	2.42376	2.56466	0.114404	-0.358883	0.0110702	0.0309801	-18.5849	0.11003	-0.446461	1e-06	0.0159511	-9	0.119168	-0.278505	1e-06	0.0704115	-30.0654	0.120757	-0.312196	1e-06	0.0680829	-29.0593
1.9778	2.42736	2.56161	0.115576	-0.354571	0.0111996	0.030596	-18.4671	0.109515	-0.440763	1e-06	0.0158176	-9	0.118846	-0.276063	1e-06	0.0698976	-29.8457	0.120396	-0.309855	1e-06	0.0675813	-28.8519
1.97896	2.43097	2.55855	0.11499	-0.351991	0.011296	0.030184	-18.3426	0.109007	-0.434938	1e-06	0.0156858	-9	0.118527	-0.27364	1e-06	0.0693873	-29.6276	0.120038	-0.307516	1e-06	0.0670836	-28.6457
1.98012	2.43458	2.55549	0.114697	-0.349217	0.0113779	0.0297553	-18.2172	0.108506	-0.428987	1e-06	0.0155556	-9	0.118211	-0.271235	1e-06	0.0688807	-29.4111	0.119682	-0.30518	1e-06	0.0665896	-28.4408
1.98128	2.43819	2.55242	0.114258	-0.346566	0.0114674	0.0293287	-18.087	0.108012	-0.422913	1e-06	0.0154269	-9	0.117898	-0.268848	1e-06	0.0683776	-29.1963	0.11933	-0.302847	1e-06	0.0660993	-28.2372
1.98244	2.44181	2.54936	0.113818	-0.343874	0.011569	0.0289146	-17.9548	0.107525	-0.416717	1e-06	0.0152999	-9	0.117587	-0.266478	1e-06	0.067878	-28.983	0.11898	-0.300518	1e-06	0.0656126	-28.0349
1.9836	2.44543	2.54629	0.113379	-0.341137	0.0116885	0.0285241	-17.8222	0.107045	-0.4104	1e-06	0.0151744	-9	0.11728	-0.264125	1e-06	0.0673818	-28.7713	0.118632	-0.298194	1e-06	0.0651295	-27.8338
1.98476	2.44905	2.54321	0.113086	-0.338353	0.0118018	0.0281364	-17.6923	0.106573	-0.403963	1e-06	0.0150504	-9	0.116975	-0.261789	1e-06	0.066889	-28.561	0.118288	-0.295875	1e-06	0.06465	-27.634
1.98592	2.45267	2.54014	0.112793	-0.335677	0.0119138	0.0277526	-17.563	0.106108	-0.39741	1e-06	0.014928	-9	0.116672	-0.25947	1e-06	0.0663995	-28.3523	0.117946	-0.293561	1e-06	0.0641739	-27.4355
1.98708	2.4563	2.53706	0.112354	-0.333107	0.0120091	0.0273514	-17.4338	0.105651	-0.390739	1e-06	0.0148071	-9	0.116373	-0.257167	1e-06	0.0659133	-28.145	0.117607	-0.291253	1e-06	0.0637013	-27.2381
1.98824	2.45993	2.53399	0.111475	-0.330479	0.0121065	0.026947	-17.3021	0.105202	-0.383954	1e-06	0.0146877	-9	0.116076	-0.25488	1e-06	0.0654303	-27.9392	0.11727	-0.288951	1e-06	0.0632321	-27.042
1.9894	2.46356	2.53091	0.111475	-0.327309	0.0122185	0.0265535	-17.1673	0.10476	-0.377056	1e-06	0.0145697	-9	0.115781	-0.252609	1e-06	0.0649505	-27.7348	0.116936	-0.286656	1e-06	0.0627661	-26.8471
1.99056	2.4672	2.52782	0.111035	-0.324554	0.0123483	0.0261822	-17.0293	0.104327	-0.370045	1e-06	0.0144533	-9	0.11549	-0.250353	1e-06	0.0644737	-27.5317	0.116605	-0.284367	1e-06	0.0623035	-26.6535
1.99172	2.47083	2.52474	0.110596	-0.32173	0.012469	0.025813	-16.8958	0.103902	-0.362924	1e-06	0.0143382	-9	0.1152	-0.248112	1e-06	0.0640001	-27.3301	0.116277	-0.282087	1e-06	0.0618441	-26.461
1.99288	2.47447	2.52165	0.109863	-0.318834	0.0125876	0.0254495	-16.7643	0.103485	-0.355693	1e-06	0.0142246	-9	0.114914	-0.245886	1e-06	0.0635294	-27.1298	0.115951	-0.279813	1e-06	0.0613879	-26.2697
1.99404	2.47811	2.51857	0.10957	-0.315541	0.0126897	0.025068	-16.6319	0.103077	-0.348355	1e-06	0.0141125	-9	0.11463	-0.243675	1e-06	0.0630616	-26.9308	0.115627	-0.277548	1e-06	0.0609348	-26.0796
1.9952	2.48175	2.51548	0.109277	-0.312328	0.0127854	0.0246795	-16.4958	0.102677	-0.34091	1e-06	0.0140017	-9	0.114349	-0.241479	1e-06	0.0625968	-26.7331	0.115307	-0.27529	1e-06	0.0604848	-25.8906
1.99636	2.48539	2.51239	0.108838	-0.30919	0.0128911	0.0242991	-16.3548	0.102286	-0.33336	1e-06	0.0138923	-9	0.11407	-0.239297	1e-06	0.0621349	-26.5367	0.114989	-0.273041	1e-06	0.0600378	-25.7028
1.99752	2.48903	2.50931	0.108545	-0.305965	0.0130131	0.0239403	-16.2119	0.101904	-0.325706	1e-06	0.0137843	-9	0.113793	-0.237128	1e-06	0.0616757	-26.3415	0.114673	-0.270801	1e-06	0.0595938	-25.5161
1.99868	2.49267	2.50622	0.107227	-0.302807	0.0131315	0.0235847	-16.0689	0.10153	-0.317949	1e-06	0.0136777	-9	0.11352	-0.234974	1e-06	0.0612194	-26.1476	0.114361	-0.268569	1e-06	0.0591528	-25.3306
1.99984	2.49631	2.50313	0.107959	-0.298591	0.0132433	0.0232343	-15.9284	0.101166	-0.310091	1e-06	0.0135724	-9	0.113248	-0.232833	1e-06	0.0607657	-25.9549	0.11405	-0.266347	1e-06	0.0587147	-25.1462
2.001	2.49995	2.50004	0.107666	-0.295555	0.0133363	0.0228661	-15.7808	0.100811	-0.302133	1e-06	0.0134684	-9	0.112979	-0.230705	1e-06	0.0603148	-25.7635	0.113743	-0.264133	1e-06	0.0582795	-24.9629
2.00216	2.5036	2.49695	0.10752	-0.292574	0.0134182	0.022482	-15.6302	0.100465	-0.294077	1e-06	0.0133657	-9	0.112713	-0.228591	1e-06	0.0598665	-25.5731	0.113438	-0.261929	1e-06	0.057847	-24.7807
2.00332	2.50724	2.49386	0.106787	-0.289804	0.0135095	0.0221017	-15.475	0.100129	-0.285922	1e-06	0.0132643	-9	0.112449	-0.226489	1e-06	0.0594207	-25.384	0.113135	-0.259734	1e-06	0.0574174	-24.5995
2.00448	2.51088	2.49077	0.106494	-0.286601	0.0136148	0.0217378	-15.3196	0.0998018	-0.277672	1e-06	0.0131642	-9	0.112188	-0.2244	1e-06	0.0589776	-25.196	0.112835	-0.257549	1e-06	0.0569904	-24.4195
2.00564	2.51452	2.48768	0.106055	-0.28344	0.0137419	0.0214046	-15.1633	0.0994845	-0.269326	1e-06	0.0130653	-9	0.111928	-0.222323	1e-06	0.0585369	-25.0091	0.112538	-0.255374	1e-06	0.0565662	-24.2405
2.0068	2.51816	2.48459	0.106055	-0.280159	0.013861	0.0210768	-15.0109	0.099177	-0.260887	1e-06	0.0129677	-9	0.111672	-0.220259	1e-06	0.0580988	-24.8233	0.112243	-0.253208	1e-06	0.0561446	-24.0625
2.00796	2.5218	2.48151	0.105469	-0.277233	0.0139875	0.0207495	-14.8519	0.0988793	-0.252354	1e-06	0.0128714	-9	0.111417	-0.218207	1e-06	0.0576631	-24.6386	0.11195	-0.251052	1e-06	0.0557256	-23.8856
2.00912	2.52544	2.47842	0.105029	-0.274018	0.0141	0.0204059	-14.6922	0.0985916	-0.243731	1e-06	0.0127762	-9	0.111166	-0.216167	1e-06	0.0572298	-24.455	0.11166	-0.248906	1e-06	0.0553092	-23.7098
2.01028	2.52908	2.47534	0.104883	-0.27067	0.0142204	0.0200626	-14.5261	0.0983139	-0.235017	1e-06	0.0126823	-9	0.110916	-0.214138	1e-06	0.0567988	-24.2725	0.111373	-0.246771	1e-06	0.0548954	-23.5349
2.01144	2.53271	2.47225	0.10459	-0.267505	0.0143541	0.0197316	-14.3553	0.0980464	-0.226213	1e-06	0.0125896	-9	0.110669	-0.212122	1e-06	0.0563702	-24.0909	0.111088	-0.244645	1e-06	0.054484	-23.3611
2.0126	2.53635	2.46917	0.10415	-0.264359	0.0145068	0.0194273	-14.1838	0.0977891	-0.217322	1e-06	0.012498	-9	0.110424	-0.210116	1e-06	0.0559439	-23.9104	0.110805	-0.24253	1e-06	0.0540751	-23.1882
2.01376	2.53998	2.46609	0.104004	-0.261067	0.0146515	0.0191274	-14.0161	0.0975422	-0.208344	1e-06	0.0124076	-9	0.110181	-0.208122	1e-06	0.0555198	-23.7309	0.110525	-0.240424	1e-06	0.0536686	-23.0163
2.01492	2.54361	2.46301	0.103564	-0.257947	0.0147916	0.0188363	-13.8514	0.0973058	-0.199279	1e-06	0.0123183	-9	0.109941	-0.206138	1e-06	0.0550979	-23.5524	0.110248	-0.238329	1e-06	0.0532645	-22.8454
2.01608	2.54724	2.45994	0.103271	-0.254674	0.014914	0.0185273	-13.6861	0.0970799	-0.19013	1e-06	0.0122302	-9	0.109703	-0.204166	1e-06	0.0546783	-23.3749	0.109973	-0.236245	1e-06	0.0528627	-22.6754
2.01724	2.55086	2.45686	0.10459	-0.251403	0.015029	0.0182039	-13.5158	0.0968647	-0.180898	1e-06	0.0121432	-9	0.109467	-0.202204	1e-06	0.0542608	-23.1983	0.1097	-0.23417	1e-06	0.0524632	-22.5064
2.0184	2.55448	2.45379	0.101953	-0.249894	0.0151576	0.0178904	-13.3402	0.0966603	-0.171583	1e-06	0.0120573	-9	0.109234	-0.200252	1e-06	0.0538454	-23.0227	0.109429	-0.232106	1e-06	0.0520661	-22.3384
2.01956	2.5581	2.45072	0.102246	-0.245816	0.0153023	0.0176003	-13.1743	0.0964667	-0.162186	1e-06	0.0119726	-9	0.109003	-0.198311	1e-06	0.0534321	-22.848	0.109161	-0.230052	1e-06	0.0516711	-22.1712
2.02072	2.56172	2.44765	0.102393	-0.242372	0.0154378	0.0173125	-13.0064	0.096284	-0.152708	1e-06	0.0118888	-9	0.108774	-0.19638	1e-06	0.0530209	-22.6742	0.108896	-0.228008	1e-06	0.0512784	-22.005
2.02188	2.56533	2.44459	0.101807	-0.239395	0.0155681	0.0170296	-12.8394	0.0961124	-0.143151	1e-06	0.0118062	-9	0.108547	-0.194459	1e-06	0.0526117	-22.5014	0.108633	-0.225975	1e-06	0.0508879	-21.8397
2.02304	2.56894	2.44153	0.1021	-0.236081	0.0156817	0.0167304	-12.673	0.0959519	-0.133516	1e-06	0.0117246	-9	0.108323	-0.192549	1e-06	0.0522045	-22.3294	0.108372	-0.223952	1e-06	0.0504995	-21.6752
2.0242	2.57255	2.43847	0.1021	-0.233388	0.015785	0.0164152	-12.5023	0.0958027	-0.123803	1e-06	0.0116441	-9	0.1081	-0.190647	1e-06	0.0517993	-22.1583	0.108113	-0.221939	1e-06	0.0501132	-21.5117
2.02536	2.57615	2.43541	0.101074	-0.23099	0.0158997	0.0161061	-12.3293	0.0956647	-0.114014	1e-06	0.0115646	-9	0.10788	-0.188756	1e-06	0.051396	-21.988	0.107857	-0.219936	1e-06	0.0497289	-21.349
2.02652	2.57975	2.43236	0.100781	-0.227764	0.0160315	0.0158175	-12.1591	0.0955382	-0.104149	1e-06	0.0114861	-9	0.107662	-0.186873	1e-06	0.0509947	-21.8186	0.107603	-0.217944	1e-06	0.0493468	-21.1871
2.02768	2.58334	2.42931	0.100635	-0.224506	0.0161512	0.0155288	-11.9926	0.0954231	-0.0942097	1e-06	0.0114087	-9.00002	0.107447	-0.185	1e-06	0.0505952	-21.65	0.107352	-0.215961	1e-06	0.0489666	-21.0262
2.02884	2.58693	2.42627	0.100195	-0.221373	0.0162649	0.0152451	-11.8286	0.0953197	-0.0841967	1e-06	0.0113322	-9.00007	0.107233	-0.183137	1e-06	0.0501975	-21.4823	0.107102	-0.213989	1e-06	0.0485885	-20.866
2.03	2.59051	2.42323	0.0997559	-0.21804	0.0163931	0.0149792	-11.6631	0.0952278	-0.0741109	1e-06	0.0112567	-9.00028	0.107022	-0.181282	1e-06	0.0498017	-21.3154	0.106855	-0.212027	1e-06	0.0482123	-20.7067
2.03116	2.59409	2.42019	0.0996094	-0.214503	0.0165096	0.0146982	-11.4943	0.0951478	-0.0639522	1e-06	0.0111822	-9.00118	0.106813	-0.179436	1e-06	0.0494077	-21.1492	0.106611	-0.210074	1e-06	0.047838	-20.5482
2.03232	2.59767	2.41716	0.0994629	-0.211078	0.016633	0.0144196	-11.319	0.0950795	-0.053718	1e-06	0.0111086	-9.00511	0.106606	-0.177599	1e-06	0.0490155	-20.9839	0.106368	-0.208132	1e-06	0.0474656	-20.3905
2.03348	2.60124	2.41413	0.0999023	-0.20776	0.0167713	0.0141585	-11.1402	0.0950232	-0.0433934	1e-06	0.011036	-9.02234	0.106401	-0.17577	1e-06	0.048625	-20.8193	0.106128	-0.2062	1e-06	0.0470951	-20.2336
2.03464	2.6048	2.41111	0.0990234	-0.205187	0.0168999	0.0138961	-10.9627	0.0949789	-0.032908	1e-06	0.0109644	-9.09993	0.106198	-0.17395	1e-06	0.0482362	-20.6555	0.10589	-0.204277	1e-06	0.0467265	-20.0775
2.0358	2.60836	2.40809	0.0990234	-0.201913	0.017019	0.0136381	-10.7935	0.094947	-0.0219242	1e-06	0.0108937	-9.47992	0.105997	-0.172139	1e-06	0.0478491	-20.4925	0.105654	-0.202364	1e-06	0.0463596	-19.9221
2.03696	2.61191	2.40508	0.098291	-0.198895	0.0171488	0.0133958	-10.623	0.0949288	-0.00832317	1e-06	0.010824	-12.3497	0.105798	-0.170335	1e-06	0.0474637	-20.3302	0.105421	-0.200461	1e-06	0.0459946	-19.7675
2.03812	2.61546	2.40207	0.098877	-0.195329	0.0172639	0.0131381	-10.4522	0.0949019	-0.0174931	1e-06	0.0107537	-9.90382	0.105602	-0.16854	1e-06	0.0470799	-20.1686	0.105189	-0.198568	1e-06	0.0456313	-19.6137
2.03928	2.619	2.39907	0.100928	-0.192651	0.0173738	0.0128753	-10.2777	0.0948902	0.000420942	1e-06	0.0106846	19.358	0.105407	-0.166752	1e-06	0.0466978	-20.0077	0.10496	-0.196684	1e-06	0.0452697	-19.4606
2.04044	2.62254	2.39607	0.0978516	-0.192462	0.0174987	0.0126273	-10.1028	0.0948844	-0.025088	1e-06	0.0106159	-9.30541	0.105215	-0.164973	1e-06	0.0463172	-19.8476	0.104733	-0.19481	1e-06	0.0449099	-19.3083
2.0416	2.62606	2.39308	0.0977051	-0.189151	0.0176126	0.0123752	-9.94771	0.0948623	-0.0124427	1e-06	0.010546	-10.8596	0.105025	-0.163201	1e-06	0.0459383	-19.6881	0.104508	-0.192945	1e-06	0.0445517	-19.1567
2.04276	2.62958	2.39009	0.0974121	-0.18592	0.0177201	0.0121279	-9.79492	0.0948598	-0.020367	1e-06	0.0104775	-9.59949	0.104836	-0.161437	1e-06	0.0455608	-19.5293	0.104286	-0.19109	1e-06	0.0441952	-19.0058
2.04392	2.6331	2.38711	0.0974121	-0.182604	0.0178354	0.0118961	-9.64234	0.0948441	-0.0052038	1e-06	0.0104081	-14.2304	0.10465	-0.15968	1e-06	0.0451849	-19.3712	0.104065	-0.189243	1e-06	0.0438403	-18.8556
2.04508	2.63661	2.38413	0.0971191	-0.17952	0.0179361	0.0116491	-9.48785	0.0948266	-0.00884009	1.96864e-05	0.0103386	-12.1113	0.104466	-0.157931	1e-06	0.0448106	-19.2138	0.103847	-0.187407	1e-06	0.0434871	-18.7061
2.04624	2.64011	2.38116	0.0969727	-0.176343	0.0180293	0.0113898	-9.33051	0.0947985	-0.0182442	6.25557e-05	0.0102684	-9.81187	0.104284	-0.156189	1e-06	0.0444376	-19.0571	0.103631	-0.185579	1e-06	0.0431354	-18.5573
2.0474	2.6436	2.3782	0.0965332	-0.17323	0.0181338	0.0111419	-9.17032	0.0947861	-0.000407804	0.000106492	0.0101992	-19.3775	0.104104	-0.154455	1e-06	0.0440662	-18.9009	0.103417	-0.18376	1e-06	0.0427853	-18.4091
2.04856	2.64708	2.37525	0.0962402	-0.169856	0.018255	0.0108973	-9.00162	0.0947798	0.001934	0.000151483	0.0101305	17.3446	0.103925	-0.152727	1e-06	0.0436962	-18.7455	0.103205	-0.18195	1e-06	0.0424368	-18.2617
2.04972	2.65056	2.3723	0.0963867	-0.166377	0.0183669	0.0106541	-8.83491	0.0947772	-0.02074	0.000197529	0.0100621	-9.56838	0.103749	-0.151007	1e-06	0.0433276	-18.5906	0.102995	-0.18015	1e-06	0.0420897	-18.1149
2.05088	2.65403	2.36935	0.0959473	-0.163269	0.0184851	0.0104267	-8.6678	0.0947614	-0.00492985	0.000244672	0.00999274	-14.4392	0.103575	-0.149293	1e-06	0.0429604	-18.4364	0.102787	-0.178358	1e-06	0.0417442	-17.9687
2.05204	2.65749	2.36642	0.0959473	-0.159888	0.0186189	0.0102172	-8.49872	0.0947452	-0.00734416	0.000292881	0.00992339	-12.8525	0.103403	-0.147586	1e-06	0.0425946	-18.2828	0.102581	-0.176574	1e-06	0.0414001	-17.8232
2.0532	2.66095	2.36349	0.0958008	-0.15671	0.0187423	0.00999441	-8.32595	0.0947226	-0.0130133	0.000342188	0.00985362	-10.714	0.103233	-0.145886	1e-06	0.0422301	-18.1297	0.102378	-0.1748	1e-06	0.0410575	-17.6783
2.05436	2.66439	2.36057	0.0955078	-0.15357	0.0188739	0.00977883	-8.15001	0.09472	-0.0201011	0.000392456	0.0097852	-9.6227	0.103064	-0.144192	1e-06	0.041867	-17.9773	0.102176	-0.173034	1e-06	0.0407163	-17.5341
2.05552	2.66782	2.35765	0.0956543	-0.150305	0.0190218	0.00958264	-7.97219	0.0947053	-0.00299848	0.000443846	0.00971599	-16.1674	0.102898	-0.142505	1e-06	0.0415051	-17.8255	0.101976	-0.171276	1e-06	0.0403765	-17.3905
2.05668	2.67125	2.35475	0.0959473	-0.147391	0.0191573	0.00938312	-7.79634	0.094694	-0.00256046	0.000496266	0.009647	-16.6302	0.102734	-0.140824	1e-06	0.0411446	-17.6742	0.101779	-0.169527	1e-06	0.0400382	-17.2474
2.05784	2.67467	2.35185	0.0956543	-0.144984	0.0192854	0.00919009	-7.6262	0.0946838	-0.00149729	0.000549729	0.0095781	-17.8817	0.102571	-0.13915	1e-06	0.0407854	-17.5235	0.101583	-0.167786	1e-06	0.0397011	-17.105
2.059	2.67808	2.34896	0.0952148	-0.142441	0.0194286	0.00901414	-7.45806	0.0946759	0.00085993	0.000604219	0.00950935	18.7284	0.102411	-0.137482	1e-06	0.0404274	-17.3734	0.10139	-0.166054	1e-06	0.0393655	-16.9632
2.06016	2.68148	2.34608	0.0947754	-0.139598	0.0195578	0.0088233	-7.29224	0.094672	-0.0216415	0.000659717	0.00944087	-9.4997	0.102252	-0.13582	1e-06	0.0400707	-17.2238	0.101198	-0.164329	1e-06	0.0390311	-16.8219
2.06132	2.68487	2.3432	0.0946289	-0.136451	0.0196807	0.00862893	-7.12772	0.0946556	-0.0048881	0.000716374	0.0093716	-14.4717	0.102096	-0.134163	1e-06	0.0397151	-17.0747	0.101009	-0.162613	1e-06	0.0386981	-16.6813
2.06248	2.68824	2.34034	0.09375	-0.133317	0.0198186	0.00845249	-6.96114	0.0946405	-0.00586229	0.000774063	0.00930242	-13.7608	0.101941	-0.132513	1e-06	0.0393608	-16.9262	0.100821	-0.160904	1e-06	0.0383663	-16.5412
2.06364	2.69161	2.33748	0.0943359	-0.129391	0.0199452	0.00827129	-6.79601	0.094623	-0.00788419	0.000832824	0.0092331	-12.5665	0.101788	-0.130869	1e-06	0.0390077	-16.7782	0.100636	-0.159204	1e-06	0.0380359	-16.4017
2.0648	2.69497	2.33463	0.0938965	-0.12627	0.0200661	0.00809128	-6.62727	0.0946002	-0.0126109	0.000892698	0.00916347	-10.8155	0.101638	-0.12923	1e-06	0.0386557	-16.6307	0.100452	-0.157511	1e-06	0.0377067	-16.2627
2.06596	2.69832	2.33179	0.0941895	-0.122828	0.0202008	0.00792853	-6.45674	0.0945997	-0.0157005	0.000953318	0.00909523	-10.1676	0.101489	-0.127597	1e-06	0.0383049	-16.4838	0.100271	-0.155826	1e-06	0.0373787	-16.1242
2.06712	2.70166	2.32896	0.0941895	-0.119863	0.0203286	0.00775414	-6.28072	0.094593	-0.0278086	0.00101504	0.00902662	-9.20706	0.101342	-0.12597	1e-06	0.0379552	-16.3373	0.100091	-0.154149	1e-06	0.0370519	-15.9863
2.06828	2.70499	2.32613	0.0941895	-0.11705	0.0204473	0.00756867	-6.10333	0.0945691	-0.0127559	0.00107805	0.00895696	-10.7782	0.101196	-0.124348	1e-06	0.0376066	-16.1913	0.0999133	-0.152479	1e-06	0.0367263	-15.849
2.06944	2.7083	2.32332	0.0938965	-0.114385	0.020578	0.00739592	-5.92489	0.0945687	-0.0153511	0.00114172	0.00888874	-10.2274	0.101053	-0.122732	1e-06	0.0372591	-16.0459	0.0997376	-0.150817	1e-06	0.0364019	-15.7121
2.0706	2.71161	2.32052	0.0930176	-0.111546	0.0206969	0.0072155	-5.74954	0.0945629	-0.0250609	0.00120649	0.0088202	-9.30659	0.100912	-0.121121	1e-06	0.0369128	-15.9009	0.0995637	-0.149162	1e-06	0.0360787	-15.5758
2.07176	2.71491	2.31772	0.0941895	-0.107886	0.0208087	0.00703572	-5.57724	0.0945428	-0.00860511	0.00127253	0.00875081	-12.2175	0.100772	-0.119515	1e-06	0.0365674	-15.7563	0.0993918	-0.147514	1e-06	0.0357566	-15.44
2.07292	2.71819	2.31494	0.093457	-0.105645	0.0209314	0.00686953	-5.39952	0.094519	-0.0131056	0.00133966	0.00868121	-10.6916	0.100634	-0.117914	1e-06	0.0362231	-15.6123	0.0992218	-0.145873	1e-06	0.0354356	-15.3046
2.07408	2.72146	2.31216	0.0930176	-0.102737	0.0210752	0.00672444	-5.22295	0.0945182	-0.0153923	0.00140737	0.00861299	-10.2202	0.100499	-0.116319	1e-06	0.0358799	-15.4687	0.0990537	-0.14424	1e-06	0.0351158	-15.1698
2.07524	2.72472	2.3094	0.0930176	-0.0994784	0.0212101	0.00657008	-5.04565	0.0945129	-0.0237019	0.00147616	0.00854451	-9.37229	0.100365	-0.114728	1e-06	0.0355377	-15.3255	0.0988875	-0.142613	1e-06	0.034797	-15.0355
2.0764	2.72797	2.30664	0.0931641	-0.0963462	0.0213518	0.00642483	-4.86536	0.094495	-0.00580937	0.00154623	0.0084753	-13.797	0.100232	-0.113143	1e-06	0.0351964	-15.1828	0.0987231	-0.140994	1e-06	0.0344793	-14.9016
2.07756	2.7312	2.3039	0.0930176	-0.0934965	0.0214779	0.00626837	-4.68533	0.0944791	-0.00566698	0.00161726	0.00840622	-13.8956	0.100102	-0.111562	1e-06	0.0348562	-15.0406	0.0985607	-0.139381	1e-06	0.0341627	-14.7682
2.07872	2.73443	2.30117	0.0931641	-0.0906053	0.0215964	0.00610979	-4.50707	0.0944636	-0.00517427	0.00168929	0.00833718	-14.2526	0.0999735	-0.109986	1e-06	0.0345169	-14.8987	0.0984001	-0.137776	1e-06	0.0338471	-14.6353
2.07988	2.73764	2.29844	0.0927246	-0.0879893	0.0217253	0.00596516	-4.32804	0.0944495	-0.00393485	0.00176229	0.00826822	-15.27	0.0998469	-0.108415	1e-06	0.0341786	-14.7573	0.0982413	-0.136176	1e-06	0.0335326	-14.5028
2.08104	2.74084	2.29573	0.0927246	-0.0850041	0.0218732	0.00583973	-4.14775	0.0944382	-0.0011725	0.00183621	0.00819943	-18.3035	0.099722	-0.106848	1e-06	0.0338412	-14.6163	0.0980845	-0.134584	1e-06	0.0332191	-14.3708
2.0822	2.74402	2.29303	0.0927246	-0.0821269	0.0220117	0.00570312	-3.96535	0.0944328	0.00461885	0.00191096	0.00813098	14.6863	0.099599	-0.105286	1e-06	0.0335047	-14.4758	0.0979294	-0.132998	1e-06	0.0329065	-14.2393
2.08336	2.74719	2.29034	0.0925781	-0.0793539	0.0221448	0.00556135	-3.78191	0.0944376	-0.0106579	0.00198639	0.00806309	-11.3997	0.0994777	-0.103729	1e-06	0.0331692	-14.3356	0.0977762	-0.131418	1e-06	0.032595	-14.1082
2.08452	2.75035	2.28766	0.0924316	-0.0765213	0.0222641	0.00540649	-3.59882	0.0944449	-0.00483915	0.00206269	0.00799534	-14.5101	0.0993583	-0.102176	1e-06	0.0328346	-14.1958	0.0976249	-0.129845	1e-06	0.0322844	-13.9775
2.08568	2.7535	2.28499	0.0922852	-0.0736256	0.0223714	0.00524455	-3.41728	0.0944321	-0.00232963	0.00214056	0.00792649	-16.886	0.0992407	-0.100627	1e-06	0.0325008	-14.0564	0.0974753	-0.128278	1e-06	0.0319748	-13.8472
2.08684	2.75663	2.28233	0.0925781	-0.070663	0.0224869	0.00509392	-3.23446	0.0944247	0.0029466	0.00221922	0.00785795	16.2207	0.0991249	-0.0990826	1e-06	0.0321679	-13.9174	0.0973276	-0.126718	1e-06	0.0316661	-13.7174
2.088	2.75975	2.27968	0.0921387	-0.0681107	0.0226217	0.00496137	-3.04727	0.0944268	-0.013132	0.00229854	0.00778991	-10.6852	0.0990108	-0.0975424	1e-06	0.0318358	-13.7788	0.0971817	-0.125163	1e-06	0.0313584	-13.588
2.08916	2.76286	2.27705	0.0922852	-0.065164	0.022782	0.00484598	-2.85459	0.0944279	-0.0115793	0.00237883	0.00772182	-11.1037	0.0988986	-0.0960065	1e-06	0.0315046	-13.6406	0.0970376	-0.123615	1e-06	0.0310515	-13.459
2.09032	2.76595	2.27443	0.0922852	-0.0624603	0.0229356	0.00472356	-2.65986	0.0944334	-0.00641786	0.0024599	0.00765396	-13.3976	0.0987881	-0.0944746	1e-06	0.0311742	-13.5027	0.0968952	-0.122072	1e-06	0.0307456	-13.3303
2.09148	2.76903	2.27182	0.0943359	-0.0598359	0.0230935	0.00459086	-2.45771	0.0944176	-0.00471426	0.00254268	0.00758499	-14.6093	0.0986794	-0.0929467	1e-06	0.0308447	-13.3652	0.0967547	-0.120536	1e-06	0.0304405	-13.2021
2.09264	2.77209	2.26922	0.0922852	-0.0595317	0.0232389	0.00444773	-2.25671	0.0944058	-0.000961993	0.00262627	0.00751624	-18.5876	0.0985724	-0.0912418	0.000373486	0.0305159	-13.2118	0.096616	-0.119005	1e-06	0.0301364	-13.0743
2.0938	2.77514	2.26663	0.0918457	-0.0570589	0.0233835	0.00430869	-2.07095	0.0944018	0.00677532	0.0027105	0.0074479	13.1787	0.0984678	-0.0891179	0.000857991	0.030188	-13.0206	0.096479	-0.11748	1e-06	0.029833	-12.9469
2.09496	2.77817	2.26406	0.0921387	-0.0541775	0.0235462	0.00418674	-1.88342	0.0944117	-0.00478882	0.0027951	0.00738025	-14.5499	0.0983658	-0.0866111	0.00134898	0.0298611	-12.795	0.0963438	-0.11596	1e-06	0.0295305	-12.8198
2.09612	2.78119	2.2615	0.0919922	-0.0516856	0.0237349	0.0040887	-1.69052	0.0944001	-0.000544405	0.00288149	0.00731153	-19.1769	0.098267	-0.0837879	0.00184639	0.0295352	-12.5409	0.0962103	-0.114447	1e-06	0.0292289	-12.6932
2.09728	2.78419	2.25895	0.0919922	-0.0490989	0.0239157	0.0039819	-1.49766	0.0943973	0.00817756	0.00296844	0.00724325	12.4201	0.0981716	-0.0807023	0.00235016	0.0292104	-12.2632	0.0960786	-0.112938	1e-06	0.0289281	-12.5669
2.09844	2.78718	2.25642	0.0918457	-0.0465746	0.0241051	0.00388404	-1.30337	0.0944104	-0.00152923	0.0030556	0.00717575	-17.8413	0.0980799	-0.0773981	0.00286018	0.0288867	-11.9659	0.0959486	-0.111436	1e-06	0.028628	-12.4409
2.0996	2.79016	2.25389	0.0918457	-0.043949	0.0242833	0.00377405	-1.10907	0.0944058	0.00653049	0.00314444	0.00710739	13.3274	0.0979921	-0.0739111	0.00337638	0.0285641	-11.6521	0.0958204	-0.109938	1e-06	0.0283288	-12.3153
2.10076	2.79312	2.25139	0.0947754	-0.0413793	0.0244552	0.00366266	-0.916066	0.0944158	-0.00427159	0.00323351	0.00703973	-14.9755	0.0979084	-0.0702705	0.00389866	0.0282427	-11.3245	0.095694	-0.108446	1e-06	0.0280303	-12.1901
2.10192	2.79606	2.24889	0.0922852	-0.0420682	0.0246417	0.00356445	-0.720265	0.0944059	0.00145495	0.0033244	0.00697111	17.9356	0.0978291	-0.0665	0.00442691	0.0279224	-10.9852	0.0955692	-0.106959	1e-06	0.0277326	-12.0652
2.10308	2.79899	2.24641	0.0915527	-0.0400853	0.0248557	0.00349012	-0.539415	0.0944064	-0.0136286	0.0034157	0.006903	-10.5698	0.0977542	-0.0626189	0.00496102	0.0276033	-10.6361	0.0954462	-0.105477	1e-06	0.0274357	-11.9407
2.10424	2.8019	2.24394	0.0918457	-0.0373518	0.025064	0.00340706	-0.360144	0.0944086	-0.00912964	0.00350779	0.00683495	-11.9852	0.0976839	-0.0586428	0.00550089	0.0272852	-10.2785	0.0953249	-0.104	1e-06	0.0271395	-11.8165
2.1054	2.80479	2.24148	0.0915527	-0.0349863	0.0252677	0.0033167	-0.177965	0.0943879	-0.00820179	0.00360196	0.00676586	-12.4083	0.0976182	-0.0545846	0.00604638	0.0269684	-9.91364	0.0952053	-0.102476	0.00047189	0.0268441	-11.5071
2.10656	2.80767	2.23904	0.0918457	-0.0323446	0.0254585	0.00321195	0.00382971	0.0943697	-0.00585505	0.00369691	0.00669689	-13.7658	0.0975573	-0.0504546	0.00659739	0.0266526	-9.54263	0.0950875	-0.100853	0.000948596	0.0265494	-11.1938
2.10772	2.81054	2.23661	0.0916992	-0.0300646	0.0256429	0.00309966	0.187301	0.094357	-0.00070063	0.00379247	0.00662819	-18.9523	0.0975012	-0.0462608	0.00715379	0.026338	-9.16635	0.0949717	-0.0991349	0.00143108	0.0262554	-10.8769
2.10888	2.81338	2.2342	0.0921387	-0.0276625	0.0258412	0.00299983	0.37209	0.094355	0.00974767	0.00388832	0.00655997	11.7329	0.09745	-0.0420095	0.00771544	0.0260244	-8.78569	0.094858	-0.0973238	0.0019193	0.0259622	-10.5563
2.11004	2.81621	2.2318	0.0918457	-0.0257763	0.0260637	0.00292085	0.560595	0.094373	0.00381728	0.00398387	0.00649265	15.3762	0.0974037	-0.0377048	0.00828221	0.0257119	-8.40156	0.0947464	-0.0954225	0.00241321	0.0256698	-10.232
2.1112	2.81903	2.22941	0.0919922	-0.0236023	0.0263194	0.00287115	0.750621	0.0943789	-0.00760006	0.00408096	0.00642477	-12.7142	0.0973625	-0.0333491	0.00885396	0.0254004	-8.01501	0.094637	-0.0934337	0.00291276	0.0253781	-9.90428
2.11236	2.82182	2.22704	0.0921387	-0.0216186	0.0265727	0.00281502	0.941339	0.0943629	-0.00343203	0.00418021	0.00635595	-15.7369	0.0973264	-0.0289417	0.00943055	0.02509	-7.62728	0.09453	-0.0913597	0.0034179	0.0250872	-9.57306
2.11352	2.8246	2.22468	0.0918457	-0.0198225	0.026811	0.00274076	1.13017	0.0943559	0.00509386	0.00427978	0.00628752	14.3132	0.0972954	-0.0244795	0.0100118	0.0247806	-7.23985	0.0944255	-0.0892031	0.00392856	0.0247971	-9.23844
2.11468	2.82736	2.22234	0.0916992	-0.0177311	0.0270415	0.00265527	1.31678	0.0943645	-0.00454866	0.00437922	0.00621976	-14.7436	0.0972696	-0.0199556	0.0105977	0.0244722	-6.85414	0.0943235	-0.0869661	0.00444469	0.0245077	-8.90048
2.11584	2.83011	2.22001	0.0918457	-0.0155019	0.0272822	0.00257857	1.50362	0.0943555	0.00333191	0.00448061	0.00615125	15.834	0.0972491	-0.0153612	0.0111879	0.0241647	-6.47056	0.0942241	-0.084651	0.00496622	0.0242191	-8.55925
2.117	2.83283	2.2177	0.0918457	-0.0134526	0.0275468	0.00252064	1.69407	0.094361	-0.00750729	0.0045819	0.00608336	-12.7638	0.097234	-0.0106895	0.0117823	0.0238583	-6.08656	0.0941275	-0.0822598	0.00549307	0.0239314	-8.21483
2.11816	2.83554	2.2154	0.0919922	-0.0114204	0.0278423	0.00248915	1.88751	0.094346	-0.00211034	0.00468538	0.00601462	-17.137	0.0972243	-0.00594548	0.0123808	0.0235527	-5.69467	0.0940337	-0.0797946	0.00602518	0.0236443	-7.86727
2.11932	2.83824	2.21312	0.0919922	-0.00956303	0.0281369	0.00245075	2.08186	0.0943422	0.00871187	0.00478894	0.00594634	12.1688	0.0972202	-0.00115671	0.0129832	0.0232481	-5.28359	0.0939428	-0.0772575	0.00656247	0.0233581	-7.51664
2.12048	2.84091	2.21085	0.0921387	-0.00771778	0.0284113	0.00239067	2.27287	0.0943593	0.00373204	0.00489184	0.0058789	15.4543	0.0972217	0.00371925	0.0135893	0.0229443	-4.93938	0.0938548	-0.0746505	0.00710485	0.0230726	-7.16301
2.12164	2.84356	2.2086	0.0893555	-0.00604264	0.0286752	0.00231503	2.46271	0.094366	-0.00590083	0.00499625	0.00581104	-13.7347	0.0972289	0.00876022	0.0141989	0.0226415	-4.56089	0.09377	-0.0719753	0.00765224	0.0227879	-6.80644
2.1228	2.8462	2.20636	0.0909668	-0.00132941	0.0289462	0.0022431	2.65099	0.0943551	0.00198579	0.00510276	0.00574249	17.283	0.097242	0.0138307	0.0148118	0.0223395	-4.11814	0.0936883	-0.0692338	0.00820454	0.0225039	-6.447
2.12396	2.84882	2.20414	0.0919922	0.0016188	0.029236	0.00218719	2.85682	0.0943587	-0.00888647	0.00520899	0.0056745	-12.0907	0.097261	0.0187953	0.0154279	0.0220384	-3.62059	0.0936097	-0.0664278	0.00876167	0.0222207	-6.08475
2.12512	2.85142	2.20193	0.0918457	0.00344695	0.0295567	0.00215652	3.07171	0.0943415	-0.00357985	0.00531761	0.00560572	-15.5962	0.0972856	0.0235417	0.016047	0.0217381	-3.07889	0.0935345	-0.063559	0.00932352	0.0219382	-5.71977
2.12628	2.854	2.19974	0.0919922	0.00543977	0.0298886	0.0021224	3.29113	0.0943355	0.00711117	0.00542617	0.00553737	12.9829	0.0973155	0.0279829	0.0166691	0.0214384	-2.50385	0.0934627	-0.060629	0.00989	0.0216565	-5.35212
2.12744	2.85656	2.19757	0.0924316	0.0072792	0.0301956	0.00205377	3.51124	0.0943499	0.00182183	0.00553388	0.00546979	17.4793	0.0973504	0.0320564	0.017294	0.0211394	-1.90589	0.0933942	-0.0576396	0.010461	0.0213755	-4.98187
2.1286	2.85911	2.19541	0.0911133	0.00864695	0.0304945	0.00196916	3.73172	0.0943537	-0.00836165	0.0056432	0.00540181	-12.3313	0.0973897	0.035723	0.0179217	0.0208409	-1.29455	0.0933293	-0.0545921	0.0110364	0.0210952	-4.60908
2.12976	2.86163	2.19327	0.0921387	0.0114684	0.0307948	0.00188318	3.94852	0.0943383	-0.00152008	0.00575488	0.00533313	-17.8529	0.0974331	0.0389646	0.0185522	0.0205428	-0.678297	0.0932679	-0.0514883	0.0116161	0.0208157	-4.23383
2.13092	2.86414	2.19115	0.0919922	0.0131823	0.0311079	0.00181043	4.1699	0.0943368	0.0120289	0.00586618	0.00526495	10.9728	0.0974799	0.0417809	0.0191855	0.0202451	-0.0642618	0.0932102	-0.0483296	0.0122	0.0205368	-3.85618
2.13208	2.86663	2.18904	0.0919922	0.0150732	0.0314504	0.00176245	4.39269	0.094329	0.00261267	0.00597878	0.00519656	16.5735	0.0975298	0.0441872	0.0198217	0.0199476	0.541788	0.0931562	-0.0451173	0.0127879	0.0202586	-3.47621
2.13324	2.86909	2.18694	0.0922852	0.0169833	0.0318305	0.00174538	4.61947	0.0943348	-0.00592907	0.00609095	0.00512864	-13.7156	0.0975823	0.0462102	0.0204606	0.0196503	1.13546	0.0931059	-0.0418531	0.0133798	0.0199811	-3.09399
2.1344	2.87154	2.18487	0.0921387	0.0185943	0.0321936	0.00169643	4.84952	0.0943252	0.00418033	0.00620524	0.00506019	15.0539	0.0976369	0.0478855	0.0211024	0.019353	1.71368	0.0930594	-0.0385381	0.0139755	0.0197043	-2.70961
2.13556	2.87397	2.18281	0.0924316	0.0203893	0.0325472	0.00162948	5.079	0.0943344	-0.00241272	0.00631856	0.00499239	-16.793	0.0976933	0.0492547	0.0217471	0.0190559	2.27452	0.0930168	-0.0351737	0.0145749	0.0194281	-2.32319
2.13672	2.87638	2.18077	0.0922852	0.0218895	0.0329026	0.00155841	5.3089	0.0943318	0.0113657	0.00643369	0.00492418	11.1689	0.0977511	0.0503625	0.0223947	0.0187587	2.81709	0.0929781	-0.031761	0.0151778	0.0191526	-1.93484
2.13788	2.87876	2.17874	0.0921387	0.0235778	0.0332633	0.00149707	5.53349	0.0943591	0.0141448	0.0065467	0.00485697	10.4582	0.09781	0.0512548	0.0230452	0.0184614	3.34135	0.0929434	-0.0283009	0.0157842	0.0188777	-1.54472
2.13904	2.88113	2.17673	0.0922852	0.0254563	0.0336507	0.00145777	5.75936	0.0943583	0.0110709	0.00666308	0.00478882	11.2622	0.0978699	0.0519768	0.0236986	0.0181641	3.8479	0.0929127	-0.024794	0.0163938	0.0186034	-1.15303
2.1402	2.88348	2.17474	0.0924316	0.0272068	0.0340739	0.00144821	5.98892	0.0943852	0.013953	0.00677743	0.00472155	10.4987	0.0979306	0.052572	0.0243549	0.0178667	4.33786	0.0928862	-0.0212407	0.0170065	0.0183297	-0.760057
2.14136	2.88581	2.17277	0.0922852	0.0288316	0.0345	0.00143042	6.22099	0.0943843	0.0112287	0.0068952	0.00465339	11.2118	0.0979918	0.0530804	0.0250141	0.0175691	4.8127	0.0928637	-0.0176407	0.0176223	0.0180566	-0.366113
2.14252	2.88811	2.17081	0.0924316	0.0306533	0.0349079	0.00138732	6.4515	0.0944122	0.0150152	0.00701074	0.00458613	10.2877	0.0980537	0.0535386	0.0256762	0.0172713	5.27409	0.0928455	-0.0139931	0.0182409	0.0177841	0.0284876
2.14368	2.8904	2.16887	0.0924316	0.0323536	0.0353128	0.00132894	6.68498	0.0944141	0.0154068	0.00712958	0.00451804	10.2176	0.098116	0.0539793	0.0263411	0.0169734	5.7238	0.0928315	-0.0102966	0.0188622	0.0175122	0.423673
2.14484	2.89266	2.16695	0.0925781	0.0340949	0.0357192	0.00127768	6.91365	0.094417	0.0171645	0.007249	0.00444999	9.94727	0.0981789	0.0544306	0.0270087	0.0166754	6.16364	0.0928219	-0.00655058	0.019486	0.0172408	0.819982
2.146	2.89491	2.16505	0.0924316	0.0357193	0.036143	0.0012443	7.14118	0.0944234	0.0242549	0.00736872	0.00438203	9.34401	0.0982423	0.0549168	0.0276791	0.0163772	6.59533	0.0928166	-0.00275699	0.0201122	0.0169699	1.21887
2.14716	2.89713	2.16316	0.0925781	0.0375492	0.0365971	0.00123885	7.36909	0.0944407	0.00372956	0.0074879	0.00431439	15.4566	0.0983063	0.055458	0.0283521	0.0160788	7.02053	0.0928157	0.0010788	0.0207406	0.0166995	1.61492
2.14832	2.89933	2.16129	0.0925781	0.0392666	0.0370783	0.00123574	7.60753	0.0944505	-0.000806422	0.00760853	0.00424652	-18.803	0.098371	0.0560705	0.0290275	0.0157803	7.44073	0.0928193	0.0049893	0.021371	0.0164297	2.00147
2.14948	2.90152	2.15944	0.0924316	0.0410338	0.0375376	0.00119702	7.84745	0.0944523	0.0172113	0.00773069	0.00417841	9.94095	0.0984365	0.0567673	0.0297055	0.0154816	7.85725	0.0928275	0.00896608	0.0220034	0.0161603	2.39878
2.15064	2.90368	2.15761	0.0924316	0.0430134	0.0379911	0.00114044	8.08971	0.0944594	0.0267154	0.00785289	0.00411046	9.24206	0.0985028	0.0575585	0.0303857	0.0151828	8.27127	0.0928403	0.0129851	0.0226374	0.0158914	2.80736
2.1518	2.90581	2.1558	0.0925781	0.0450476	0.0384479	0.00108608	8.33178	0.0944804	0.00855891	0.00797409	0.00404287	12.2388	0.09857	0.0584513	0.0310682	0.0148838	8.68378	0.0928578	0.0170218	0.0232729	0.0156229	3.22717
2.15296	2.90793	2.154	0.0928711	0.0469786	0.0389108	0.00104783	8.56968	0.0945024	0.0107102	0.00809577	0.0039753	11.3818	0.0986384	0.0594509	0.0317528	0.0145848	9.09559	0.09288	0.0210514	0.0239099	0.0153549	3.65789
2.15412	2.91003	2.15223	0.0930176	0.0486487	0.0393998	0.00103492	8.80878	0.0944952	0.00512265	0.0082215	0.00390694	14.2914	0.098708	0.0605605	0.0324393	0.0142856	9.50737	0.0929068	0.0250505	0.024548	0.0150873	4.09895
2.15528	2.9121	2.15047	0.0928711	0.0502203	0.0399265	0.00105355	9.05057	0.094509	0.00348048	0.00834534	0.00383913	15.6905	0.098779	0.0617819	0.0331277	0.0139863	9.91961	0.0929382	0.0289969	0.0251873	0.01482	4.54946
2.15644	2.91415	2.14873	0.0927246	0.0520159	0.0404341	0.00103709	9.29409	0.0945193	0.000331652	0.00847018	0.00377122	19.491	0.0988514	0.0631155	0.0338177	0.0136868	10.3327	0.0929742	0.0328707	0.0258275	0.0145531	5.00833
2.1576	2.91618	2.147	0.0927246	0.0540378	0.0409333	0.00100103	9.53956	0.0945232	-0.00586751	0.00859642	0.00370314	-13.7573	0.0989254	0.0645612	0.0345093	0.0133873	10.7469	0.0930146	0.0366549	0.0264686	0.0142866	5.47424
2.15876	2.91819	2.1453	0.0931641	0.0561283	0.0414388	0.000962374	9.78846	0.0945167	0.00927528	0.00872456	0.00363479	11.9237	0.0990012	0.0661179	0.0352023	0.0130877	11.1623	0.0930593	0.0403351	0.0271104	0.0140203	5.9458
2.15992	2.92017	2.14362	0.0933105	0.0578092	0.041941	0.000935007	10.0308	0.0945421	0.0143704	0.00884921	0.00356723	10.412	0.0990789	0.0677843	0.0358965	0.0127879	11.579	0.0931082	0.0439007	0.0277528	0.0137542	6.42155
2.16108	2.92214	2.14195	0.0931641	0.0594032	0.0424648	0.000932072	10.2709	0.0945455	0.0199759	0.00897725	0.00349913	9.63394	0.0991585	0.0695589	0.0365918	0.0124881	11.997	0.0931611	0.0473438	0.0283958	0.0134884	6.90005
2.16224	2.92408	2.14031	0.0916992	0.0612329	0.0430215	0.000959761	10.5112	0.0945585	-0.000423147	0.00910457	0.00343125	-19.3548	0.0992403	0.0714399	0.037288	0.0121882	12.4162	0.093218	0.0506603	0.0290393	0.0132228	7.37995
2.1634	2.926	2.13868	0.0930176	0.0647433	0.043556	0.000952254	10.7532	0.0945626	0.0211203	0.00923366	0.00336314	9.53832	0.0993243	0.0734257	0.0379851	0.0118881	12.8364	0.0932786	0.0538485	0.0296832	0.0129573	7.85998
2.16456	2.92789	2.13707	0.0933105	0.0668932	0.0440699	0.000910314	11.0074	0.0945776	0.00268001	0.0093618	0.00329529	16.501	0.0994107	0.075515	0.0386827	0.0115879	13.2577	0.0933429	0.0569099	0.0303274	0.012692	8.33903
2.16572	2.92977	2.13548	0.0933105	0.0688074	0.0445925	0.000863331	11.2679	0.0945873	0.000601955	0.00949119	0.0032273	19.0936	0.0994995	0.0777064	0.0393807	0.0112877	13.6796	0.0934106	0.059848	0.0309719	0.0124267	8.81616
2.16688	2.93162	2.13391	0.0936035	0.0708089	0.0451058	0.000824418	11.519	0.0945928	-0.0034563	0.00962171	0.00315922	-15.7136	0.099591	0.0799991	0.040079	0.0109873	14.1021	0.0934816	0.0626684	0.0316166	0.0121615	9.29065
2.16804	2.93344	2.13236	0.09375	0.0725798	0.0456322	0.00080747	11.7665	0.0945918	0.0158505	0.00975369	0.003091	10.1429	0.0996852	0.0823923	0.0407774	0.0106868	14.5249	0.0935559	0.0653781	0.0322614	0.0118964	9.76186
2.1692	2.93525	2.13083	0.093457	0.0742824	0.0461863	0.00082099	12.0126	0.0945992	-0.0107502	0.009885	0.00302295	-11.3683	0.0997822	0.0848855	0.0414757	0.0103861	14.9478	0.0936332	0.0679855	0.0329064	0.0116313	10.2293
2.17036	2.93703	2.12932	0.094043	0.0764	0.0467548	0.000815407	12.2708	0.0945848	0.00280106	0.01002	0.00295445	16.3724	0.0998821	0.0874788	0.0421737	0.0100853	15.3706	0.0937135	0.0704997	0.0335514	0.0113661	10.6926
2.17152	2.93879	2.12783	0.0941895	0.0779733	0.047299	0.000773669	12.5316	0.0945956	0.00207393	0.0101519	0.00288646	17.1794	0.0999852	0.0901724	0.0428712	0.00978437	15.7931	0.0937966	0.0729308	0.0341963	0.0111009	11.1514
2.17268	2.94052	2.12636	0.0938965	0.0794853	0.0478505	0.00072439	12.7955	0.094605	0.000798274	0.0102844	0.00281844	18.8145	0.100091	0.0929666	0.0435681	0.00948327	16.2151	0.0938826	0.0752894	0.0348412	0.0108357	11.6056
2.17384	2.94223	2.12491	0.09375	0.0814188	0.0483969	0.000679904	13.0507	0.0946117	-0.00162645	0.0104179	0.00275036	-17.7194	0.100201	0.0958621	0.0442642	0.009182	16.6365	0.0939712	0.0775861	0.0354858	0.0105704	12.0551
2.175	2.94392	2.12348	0.0938965	0.083616	0.0489412	0.000654102	13.2957	0.0946147	0.0212265	0.0105524	0.0026822	9.53022	0.100314	0.0988599	0.0449592	0.00888055	17.0569	0.0940624	0.079832	0.0361303	0.010305	12.4998
2.17616	2.94558	2.12207	0.094043	0.085759	0.0495073	0.000656248	13.5398	0.0946313	0.00604592	0.0106853	0.00261429	13.6376	0.10043	0.101961	0.045653	0.00857891	17.4764	0.0941562	0.0820379	0.0367744	0.0100396	12.9397
2.17732	2.94722	2.12067	0.0941895	0.0878506	0.0501005	0.000670074	13.792	0.0946508	0.010601	0.0108181	0.00254641	11.4193	0.10055	0.105166	0.0463453	0.00827706	17.8948	0.0942525	0.0842145	0.0374182	0.00977395	13.375
2.17848	2.94884	2.1193	0.0943359	0.0898934	0.0506753	0.00064756	14.0494	0.0946486	0.0131013	0.0109549	0.00247815	10.6926	0.100674	0.108477	0.047036	0.00797498	18.3119	0.0943514	0.0863722	0.0380615	0.00950821	13.8056
2.17964	2.95043	2.11795	0.0941895	0.09189	0.0512422	0.000608048	14.3088	0.0946524	0.0233917	0.0110911	0.00240999	9.38916	0.100802	0.111895	0.0477248	0.00767267	18.7277	0.0944527	0.0885209	0.0387042	0.00924232	14.2319
2.1808	2.952	2.11662	0.0943359	0.0941636	0.0518153	0.000570083	14.5692	0.0946725	0.0105069	0.0112252	0.00234209	11.452	0.100934	0.115421	0.0484115	0.0073701	19.142	0.0945566	0.0906703	0.0393463	0.00897626	14.6538
2.18196	2.95355	2.11531	0.0946289	0.0963964	0.0523791	0.000546012	14.8195	0.0946707	0.0140834	0.0113633	0.00227383	10.4711	0.10107	0.119056	0.0490959	0.00706726	19.5549	0.0946629	0.0928295	0.0399876	0.00871004	15.0716
2.18312	2.95507	2.11402	0.0972656	0.0984309	0.0529566	0.000547428	15.066	0.0946771	0.0299299	0.0115005	0.0022057	9.15292	0.10121	0.122801	0.0497778	0.00676413	19.9662	0.0947717	0.095007	0.040628	0.00844363	15.4855
2.18428	2.95657	2.11275	0.09375	0.097705	0.0535657	0.000579756	15.3139	0.0947057	0.0193104	0.0116343	0.00213789	9.69717	0.101355	0.126657	0.050457	0.00646069	20.376	0.0948831	0.0972108	0.0412674	0.00817702	15.8957
2.18544	2.95804	2.1115	0.0947754	0.10095	0.0541528	0.00057718	15.5474	0.0947208	0.00519062	0.0117708	0.00206986	14.2403	0.101504	0.130625	0.0511332	0.00615691	20.7842	0.094997	0.0994484	0.0419058	0.00791021	16.3024
2.1866	2.95949	2.11027	0.0949219	0.103202	0.0547173	0.00053737	15.791	0.0947396	0.0108019	0.011907	0.00200187	11.3508	0.101658	0.134705	0.0518061	0.00585279	21.1909	0.0951135	0.101726	0.0425429	0.00764318	16.7057
2.18776	2.96091	2.10907	0.0953613	0.105424	0.0552908	0.000494369	16.0401	0.0947397	0.0175493	0.0120469	0.00193362	9.8966	0.101817	0.138897	0.0524756	0.00554829	21.5959	0.0952327	0.104051	0.0431786	0.00737592	17.1059
2.18892	2.96231	2.10788	0.0947754	0.107299	0.0558508	0.000461293	16.2781	0.0947527	0.00269338	0.0121849	0.00186553	16.4867	0.10198	0.143202	0.0531415	0.00524339	21.9995	0.0953547	0.106429	0.0438129	0.00710842	17.5031
2.19008	2.96369	2.10671	0.0953613	0.109951	0.0564165	0.000450497	16.5071	0.0947658	0.00586154	0.0123233	0.00179744	13.7614	0.102149	0.147618	0.0538034	0.00493807	22.4015	0.0954794	0.108864	0.0444455	0.00684068	17.8976
2.19124	2.96504	2.10557	0.0952148	0.112102	0.0570051	0.000469714	16.737	0.0947873	0.0136555	0.0124605	0.00172943	10.5638	0.102323	0.152146	0.0544612	0.00463229	22.8021	0.0956069	0.111361	0.0450764	0.00657267	18.2894
2.1924	2.96636	2.10444	0.0952148	0.114555	0.0576017	0.000491078	16.9688	0.0947943	-0.00801398	0.0126007	0.00166125	-12.501	0.102502	0.156784	0.0551145	0.00432604	23.2013	0.0957374	0.113924	0.0457053	0.00630438	18.6788
2.19356	2.96766	2.10334	0.0955078	0.117154	0.0581799	0.000475874	17.2074	0.0947884	0.013232	0.0127436	0.00159291	10.6613	0.102687	0.16153	0.0557633	0.00401928	23.5992	0.0958709	0.116557	0.0463321	0.00603581	19.0658
2.19472	2.96894	2.10226	0.0956543	0.119581	0.0587662	0.000454302	17.4541	0.094795	-0.00870059	0.0128847	0.00152471	-12.1739	0.102877	0.166383	0.0564071	0.00371198	23.9958	0.0960075	0.119263	0.0469567	0.00576695	19.4506
2.19588	2.97019	2.10119	0.0956543	0.122	0.059348	0.000437955	17.6968	0.0947882	0.0125594	0.0130285	0.00145637	10.8289	0.103073	0.17134	0.0570459	0.00340411	24.3912	0.0961473	0.122044	0.0475789	0.00549777	19.8334
2.19704	2.97142	2.10015	0.0963867	0.124573	0.0599222	0.000440758	17.9282	0.0947939	0.0304403	0.0131704	0.00138816	9.14217	0.103274	0.176399	0.0576793	0.00309563	24.7854	0.0962903	0.124903	0.0481985	0.00522827	20.2142
2.1982	2.97262	2.09914	0.0962402	0.126503	0.0605112	0.000472014	18.1563	0.0948248	0.0227197	0.0133078	0.00132017	9.42836	0.103482	0.181556	0.0583072	0.00278652	25.1786	0.0964367	0.127841	0.0488154	0.00495844	20.5932
2.19936	2.9738	2.09814	0.0960938	0.128754	0.0611011	0.000504644	18.3815	0.0948462	0.0138925	0.0134472	0.00125207	10.5117	0.103696	0.186809	0.0589292	0.00247674	25.5708	0.0965865	0.13086	0.0494293	0.00468825	20.9704
2.20052	2.97495	2.09716	0.0968262	0.131328	0.061671	0.000501499	18.6107	0.0948549	-0.00298539	0.0135895	0.00118385	-16.1808	0.103915	0.192154	0.0595453	0.00216625	25.962	0.0967399	0.133961	0.0500402	0.00441769	21.3459
2.20168	2.97607	2.09621	0.0971191	0.133268	0.0622463	0.000488918	18.8474	0.0948586	0.0251324	0.013733	0.00111559	9.30348	0.104141	0.197585	0.060155	0.00185501	26.3523	0.0968969	0.137143	0.0506478	0.00414675	21.7197
2.20284	2.97717	2.09527	0.0959473	0.135056	0.0628292	0.000479281	19.0838	0.0948836	0.0176744	0.0138726	0.00104748	9.88071	0.104374	0.2031	0.0607584	0.00154298	26.7418	0.0970577	0.140408	0.051252	0.00387541	22.092
2.204	2.97825	2.09436	0.098584	0.138298	0.0633967	0.00048575	19.302	0.0948988	0.00744751	0.0140144	0.000979279	12.7961	0.104613	0.208692	0.061355	0.00123012	27.1305	0.0972223	0.143755	0.0518526	0.00360365	22.4628
2.20516	2.9793	2.09347	0.0969727	0.138831	0.0639779	0.000519177	19.5206	0.0948926	0.0110934	0.0141608	0.000910936	11.2549	0.104858	0.214358	0.0619449	0.000916398	27.5184	0.0973908	0.147185	0.0524494	0.00333145	22.8321
2.20632	2.98032	2.0926	0.0972656	0.141303	0.0645575	0.000554814	19.7259	0.0948968	0.0281853	0.0143055	0.000842658	9.19621	0.10511	0.220091	0.0625276	0.00060176	27.9056	0.0975633	0.150696	0.0530422	0.0030588	23.1999
2.20748	2.98132	2.09175	0.0971191	0.143633	0.0651136	0.000553964	19.9348	0.0949261	0.022157	0.0144451	0.00077451	9.46422	0.105369	0.225886	0.0631031	0.000286166	28.292	0.0977399	0.154288	0.0536309	0.00278568	23.5663
2.20864	2.9823	2.09093	0.0972656	0.146306	0.0656562	0.000526699	20.147	0.0949479	0.0152803	0.0145865	0.000706303	10.2399	0.105634	0.231739	0.0636712	1e-06	28.6776	0.0979208	0.157959	0.0542153	0.00251205	23.9312
2.2098	2.98324	2.09012	0.0974121	0.149005	0.0662125	0.000500103	20.3667	0.0949603	0.00441	0.0147301	0.000638036	14.8585	0.105906	0.237469	0.0642318	1e-06	29.052	0.0981059	0.161709	0.0547952	0.00223791	24.2948
2.21096	2.98417	2.08934	0.0977051	0.151733	0.0667528	0.000486539	20.5743	0.0949812	0.0149636	0.0148722	0.000569795	10.2972	0.106185	0.242983	0.0647849	1e-06	29.41	0.0982955	0.165536	0.0553703	0.00196323	24.6569
2.21212	2.98506	2.08858	0.0977051	0.154332	0.067295	0.000496836	20.7742	0.0949935	0.00444959	0.0150163	0.000501506	14.8255	0.10647	0.248309	0.0653307	1e-06	29.7534	0.0984895	0.169439	0.0559407	0.00168798	25.0176
2.21328	2.98593	2.08784	0.0984375	0.157128	0.0678327	0.000510862	20.9707	0.0950149	0.0156719	0.0151586	0.000433236	10.1724	0.106761	0.253469	0.0658692	1e-06	30.0839	0.098688	0.173415	0.056506	0.00141215	25.3768
2.21444	2.98678	2.08713	0.098291	0.159321	0.068379	0.000527087	21.172	0.0950286	0.00668664	0.0153028	0.000364927	13.2319	0.107058	0.258484	0.0664005	1e-06	30.403	0.0988913	0.177464	0.0570661	0.0011357	25.7345
2.2156	2.9876	2.08643	0.098291	0.161877	0.0689106	0.000513764	21.376	0.0950581	0.023043	0.0154436	0.000296643	9.40903	0.10736	0.263371	0.0669247	1e-06	30.712	0.0990992	0.181582	0.0576209	0.000858619	26.0908
2.21676	2.98839	2.08576	0.0984375	0.164638	0.0694522	0.000497218	21.5861	0.0950821	0.0181943	0.0155858	0.000228324	9.81767	0.107669	0.268143	0.0674417	1e-06	31.012	0.099312	0.185768	0.0581701	0.000580869	26.4455
2.21792	2.98916	2.08511	0.0987305	0.167449	0.0699881	0.000489827	21.7907	0.0950998	0.0119759	0.0157296	0.000159979	10.9879	0.107983	0.272812	0.0679517	1e-06	31.304	0.0995296	0.19002	0.0587137	0.000302426	26.7987
2.21908	2.9899	2.08448	0.0987305	0.170151	0.0705145	0.000503977	21.983	0.0951079	-0.00147002	0.0158758	9.16136e-05	-17.9164	0.108302	0.277389	0.0684546	1e-06	31.5887	0.0997522	0.194336	0.0592514	2.32615e-05	27.1503
2.22024	2.99061	2.08387	0.0990234	0.173069	0.0710521	0.000535812	22.174	0.0951165	0.0345012	0.016022	2.32395e-05	9.07959	0.108626	0.28188	0.0689506	1e-06	31.8669	0.0999799	0.198688	0.0597831	1e-06	27.415
2.2214	2.9913	2.08329	0.0996094	0.175886	0.0715893	0.000570651	22.3653	0.0951548	0.0316715	0.0161615	1e-06	9.11924	0.108956	0.286293	0.0694395	1e-06	32.139	0.100213	0.203051	0.0603087	1e-06	27.6699
2.22256	2.99197	2.08272	0.098584	0.178285	0.0721042	0.00056825	22.5621	0.09519	0.0289032	0.0163017	1e-06	9.17708	0.10929	0.290632	0.0699214	1e-06	32.4057	0.10045	0.20742	0.0608281	1e-06	27.9223
2.22372	2.9926	2.08218	0.100195	0.182033	0.0726199	0.000556497	22.7616	0.0952219	0.0261304	0.0164428	1e-06	9.26315	0.10963	0.294903	0.0703964	1e-06	32.6673	0.100693	0.211792	0.0613413	1e-06	28.1722
2.22488	2.99322	2.08167	0.0999023	0.184248	0.0731442	0.000550875	22.9693	0.0952506	0.0232695	0.0165847	1e-06	9.39601	0.109974	0.299109	0.0708645	1e-06	32.9241	0.100941	0.216168	0.061848	1e-06	28.4194
2.22604	2.9938	2.08117	0.0999023	0.187018	0.0736504	0.000563772	23.1578	0.0952758	0.020173	0.0167275	1e-06	9.61633	0.110324	0.303251	0.0713256	1e-06	33.1765	0.101194	0.220545	0.0623483	1e-06	28.6641
2.2272	2.99436	2.0807	0.100195	0.190026	0.0741611	0.000603728	23.3377	0.0952972	0.0165348	0.0168714	1e-06	10.0364	0.110678	0.307334	0.0717798	1e-06	33.4247	0.101452	0.224923	0.062842	1e-06	28.9061
2.22836	2.99489	2.08024	0.100781	0.192954	0.0746644	0.000645225	23.5153	0.0953137	0.011511	0.0170165	1e-06	11.1244	0.111037	0.311358	0.0722272	1e-06	33.6688	0.101715	0.2293	0.0633292	1e-06	29.1455
2.22952	2.9954	2.07982	0.100342	0.195485	0.0751446	0.000652674	23.6969	0.0953222	0.000438445	0.0171638	1e-06	19.3321	0.1114	0.315325	0.0726677	1e-06	33.9091	0.101983	0.233674	0.0638096	1e-06	29.3821
2.23068	2.99588	2.07941	0.100928	0.198746	0.0756157	0.000637709	23.8821	0.0953352	0.00914435	0.01731	1e-06	11.9789	0.111768	0.319236	0.0731014	1e-06	34.1456	0.102256	0.238045	0.0642833	1e-06	29.616
2.23184	2.99633	2.07902	0.100635	0.201618	0.0760998	0.000625102	24.0758	0.095339	0.030841	0.0174586	1e-06	9.13426	0.112141	0.323091	0.0735283	1e-06	34.3784	0.102534	0.242411	0.0647502	1e-06	29.8472
2.233	2.99676	2.07866	0.101221	0.205066	0.0765674	0.00062956	24.2553	0.095374	0.0295443	0.0175993	1e-06	9.16158	0.112518	0.326892	0.0739484	1e-06	34.6078	0.102817	0.246771	0.0652102	1e-06	30.0756
2.23416	2.99716	2.07832	0.101514	0.208134	0.0770329	0.00065961	24.4274	0.0954076	0.028341	0.0177405	1e-06	9.19189	0.112899	0.330639	0.0743618	1e-06	34.8336	0.103105	0.251123	0.0656632	1e-06	30.3011
2.23532	2.99753	2.078	0.101953	0.211145	0.0774839	0.000690497	24.5938	0.0954398	0.0272246	0.0178819	1e-06	9.22507	0.113285	0.334331	0.0747685	1e-06	35.0561	0.103399	0.255466	0.0661094	1e-06	30.5238
2.23648	2.99788	2.07771	0.101953	0.213943	0.0779411	0.000704441	24.7717	0.0954708	0.0261891	0.0180237	1e-06	9.26096	0.113675	0.337971	0.0751685	1e-06	35.2751	0.103697	0.2598	0.0665485	1e-06	30.7437
2.23764	2.9982	2.07744	0.1021	0.217013	0.0783894	0.000694485	24.9552	0.0955006	0.0252287	0.0181658	1e-06	9.29933	0.114069	0.341556	0.0755619	1e-06	35.4909	0.104	0.264121	0.0669805	1e-06	30.9606
2.2388	2.9985	2.07718	0.102539	0.220198	0.0788505	0.000685411	25.1463	0.0955293	0.0243383	0.0183081	1e-06	9.33993	0.114467	0.345089	0.0759487	1e-06	35.7033	0.104309	0.26843	0.0674055	1e-06	31.1746
2.23996	2.99877	2.07696	0.102686	0.223181	0.0793016	0.000688053	25.33	0.0955571	0.0235133	0.0184507	1e-06	9.38245	0.11487	0.348568	0.076329	1e-06	35.9124	0.104622	0.272724	0.0678234	1e-06	31.3857
2.24112	2.99901	2.07675	0.102979	0.226288	0.0797426	0.000714039	25.5002	0.0955839	0.0227501	0.0185934	1e-06	9.42651	0.115276	0.351995	0.0767027	1e-06	36.1184	0.10494	0.277004	0.0682341	1e-06	31.5937
2.24228	2.99923	2.07657	0.103271	0.229361	0.0801655	0.000741705	25.6626	0.0956099	0.0220456	0.0187364	1e-06	9.47167	0.115686	0.355368	0.07707	1e-06	36.321	0.105263	0.281267	0.0686377	1e-06	31.7988
2.24344	2.99942	2.07641	0.103564	0.232405	0.0805863	0.000771862	25.8245	0.0956351	0.0213983	0.0188796	1e-06	9.51737	0.1161	0.358689	0.0774309	1e-06	36.5205	0.105591	0.285512	0.0690341	1e-06	32.0009
2.2446	2.99958	2.07627	0.103857	0.235423	0.0809955	0.000776656	25.9925	0.0956596	0.0208078	0.0190229	1e-06	9.5629	0.116518	0.361958	0.0777854	1e-06	36.7168	0.105924	0.289739	0.0694233	1e-06	32.2
2.24576	2.99971	2.07615	0.104004	0.23842	0.0814121	0.000777787	26.1668	0.0956834	0.0202757	0.0191663	1e-06	9.60736	0.11694	0.365174	0.0781335	1e-06	36.9099	0.106262	0.293945	0.0698053	1e-06	32.396
2.24692	2.99982	2.07606	0.104297	0.241558	0.0818369	0.000788428	26.342	0.0957066	0.019806	0.0193099	1e-06	9.64952	0.117365	0.368339	0.0784755	1e-06	37.0999	0.106605	0.298131	0.0701801	1e-06	32.589
2.24808	2.99991	2.07599	0.104004	0.244683	0.0822438	0.000820215	26.5016	0.0957294	0.0194058	0.0194535	1e-06	9.68772	0.117795	0.371451	0.0788112	1e-06	37.2867	0.106952	0.302294	0.0705478	1e-06	32.7789
2.24924	2.99996	2.07594	0.104883	0.248439	0.0826242	0.000851493	26.6501	0.0957517	0.019087	0.0195972	1e-06	9.71977	0.118227	0.374512	0.0791407	1e-06	37.4704	0.107305	0.306434	0.0709082	1e-06	32.9657
2.2504	2.99999	2.07592	0.105176	0.251549	0.0829978	0.000885402	26.7996	0.0957737	0.018867	0.0197409	1e-06	9.74275	0.118663	0.377521	0.0794642	1e-06	37.651	0.107662	0.31055	0.0712614	1e-06	33.1494
2.25156	3	2.07591	0.105469	0.254657	0.0833544	0.000894866	26.9522	0.0957955	0.0187709	0.0198846	1e-06	9.75302	0.119103	0.380479	0.0797816	1e-06	37.8286	0.108024	0.31464	0.0716075	1e-06	33.3301
2.25272	2.99998	2.07593	0.106348	0.257768	0.0837021	0.000882996	27.1108	0.0958173	0.018833	0.0200282	1e-06	9.74637	0.119546	0.383386	0.080093	1e-06	38.003	0.10839	0.318705	0.0719464	1e-06	33.5076
2.25388	2.99993	2.07597	0.105908	0.260245	0.0840647	0.000876122	27.2761	0.0958393	0.0190973	0.0201716	1e-06	9.71872	0.119992	0.386242	0.0803985	1e-06	38.1744	0.108762	0.322742	0.0722782	1e-06	33.6821
2.25504	2.99985	2.07604	0.106201	0.263532	0.0844091	0.000887405	27.4227	0.0958617	0.0196157	0.0203148	1e-06	9.66741	0.120442	0.389049	0.0806982	1e-06	38.3428	0.109138	0.326751	0.0726029	1e-06	33.8534
2.2562	2.99975	2.07613	0.106641	0.266834	0.0847251	0.000898265	27.558	0.0958849	0.0204431	0.0204577	1e-06	9.593	0.120895	0.391805	0.080992	1e-06	38.5082	0.109518	0.330731	0.0729204	1e-06	34.0217
2.25736	2.99962	2.07624	0.106934	0.269993	0.0850247	0.00091104	27.6869	0.0959092	0.0216276	0.0206001	1e-06	9.50069	0.121351	0.394512	0.08128	1e-06	38.6707	0.109903	0.334682	0.0732309	1e-06	34.1869
2.25852	2.99946	2.07637	0.107227	0.273175	0.0853292	0.000934269	27.8157	0.0959352	0.0231998	0.0207418	1e-06	9.39997	0.12181	0.39717	0.0815624	1e-06	38.8301	0.110293	0.338601	0.0735344	1e-06	34.3489
2.25968	2.99928	2.07652	0.107373	0.276383	0.0856257	0.000935439	27.9514	0.0959632	0.0251654	0.0208828	1e-06	9.30205	0.122273	0.399779	0.0818391	1e-06	38.9867	0.110687	0.34249	0.0738309	1e-06	34.5079
2.26084	2.99907	2.0767	0.107813	0.279781	0.0859325	0.000937798	28.0937	0.0959937	0.0275053	0.0210229	1e-06	9.21622	0.122738	0.402339	0.0821103	1e-06	39.1403	0.111086	0.346346	0.0741204	1e-06	34.6638
2.262	2.99884	2.0769	0.108105	0.283053	0.0862314	0.000952968	28.2299	0.0960272	0.0301838	0.0211619	1e-06	9.14748	0.123206	0.404852	0.0823759	1e-06	39.2911	0.111489	0.350169	0.074403	1e-06	34.8166
2.26316	2.99858	2.07712	0.108398	0.286365	0.0865158	0.000991818	28.3515	0.0960639	0.0331585	0.0212997	1e-06	9.09642	0.123677	0.407317	0.0826361	1e-06	39.439	0.111897	0.353958	0.0746787	1e-06	34.9664
2.26432	2.99829	2.07736	0.108984	0.289719	0.0867751	0.00103115	28.4632	0.0961042	0.036389	0.0214362	1e-06	9.06078	0.124151	0.409734	0.0828909	1e-06	39.5841	0.112309	0.357713	0.0749476	1e-06	35.1131
2.26548	2.99797	2.07763	0.108984	0.2928	0.0870276	0.00107334	28.5731	0.0961484	0.0398421	0.0215713	1e-06	9.03711	0.124628	0.412106	0.0831404	1e-06	39.7263	0.112725	0.361433	0.0752097	1e-06	35.2568
2.26664	2.99763	2.07792	0.10957	0.296252	0.0872673	0.00109365	28.6871	0.0961967	0.0434921	0.0217048	1e-06	9.02203	0.125107	0.41443	0.0833846	1e-06	39.8658	0.113146	0.365118	0.0754651	1e-06	35.3974
2.2678	2.99727	2.07823	0.109717	0.299439	0.0875078	0.00110915	28.8067	0.0962493	0.0473208	0.0218366	1e-06	9.01275	0.125589	0.41671	0.0836236	1e-06	40.0026	0.113571	0.368766	0.0757138	1e-06	35.535
2.26896	2.99687	2.07856	0.110156	0.302846	0.0877556	0.00113381	28.928	0.0963065	0.0513152	0.0219668	1e-06	9.00721	0.126074	0.418943	0.0838574	1e-06	40.1366	0.114	0.372377	0.0759559	1e-06	35.6696
2.27012	2.99645	2.07892	0.110449	0.306157	0.0879807	0.00117928	29.0328	0.0963685	0.0554666	0.0220951	1e-06	9.00398	0.126561	0.421132	0.0840862	1e-06	40.2679	0.114433	0.37595	0.0761914	1e-06	35.8012
2.27128	2.99601	2.0793	0.110889	0.309536	0.0881756	0.00122469	29.1254	0.0964353	0.0597685	0.0222215	1e-06	9.00215	0.127051	0.423277	0.0843099	1e-06	40.3966	0.11487	0.379486	0.0764204	1e-06	35.9299
2.27244	2.99553	2.0797	0.111182	0.312826	0.0883593	0.0012732	29.2142	0.0965072	0.0642162	0.022346	1e-06	9.00114	0.127543	0.425377	0.0845287	1e-06	40.5226	0.115312	0.382984	0.0766429	1e-06	36.0556
2.2736	2.99504	2.08012	0.111768	0.316193	0.0885296	0.00130164	29.3073	0.0965843	0.068806	0.0224684	1e-06	9.00059	0.128038	0.427434	0.0847426	1e-06	40.6461	0.115757	0.386442	0.0768591	1e-06	36.1784
2.27476	2.99451	2.08057	0.111914	0.319321	0.0886929	0.00131236	29.4072	0.0966669	0.0735347	0.0225886	1e-06	9.0003	0.128535	0.429448	0.0849516	1e-06	40.7669	0.116206	0.389861	0.0770689	1e-06	36.2982
2.27592	2.99396	2.08104	0.1125	0.322693	0.0888705	0.00133095	29.5125	0.096755	0.0783993	0.0227067	1e-06	9.00015	0.129034	0.43142	0.0851558	1e-06	40.8852	0.11666	0.39324	0.0772724	1e-06	36.4152
2.27708	2.99338	2.08153	0.112646	0.325834	0.0890252	0.00136749	29.6023	0.0968488	0.0833971	0.0228224	1e-06	9.00007	0.129535	0.43335	0.0853553	1e-06	41.001	0.117117	0.39658	0.0774698	1e-06	36.5293
2.27824	2.99278	2.08204	0.112939	0.329228	0.089141	0.00140113	29.676	0.0969485	0.0885252	0.0229358	1e-06	9.00004	0.130039	0.435238	0.0855501	1e-06	41.1143	0.117578	0.399878	0.077661	1e-06	36.6405
[truncated: 2,347 more rows]
