# Supplementary material for: Effects of friction models on simulation of pneumatic cylinder
Source: Copernicus journal article supplement (doi:10.5194/ms-10-517-2019), 2019-10-30
Supplement: Supplementary file 6 [file Highlights.doc]

**Highlights:**

- The revised LuGre model can the best agreement among the three friction models.
- The LuGre model cannot simulate well the stick-slip motion of the cylinder piston at low velocity range.
- The steady-state friction model used in this study is unable to simulate the stick-slip motion as well as causes much oscillation behavior in the velocity and friction force characteristics.
