# Supplementary material for: Effects of friction models on simulation of pneumatic cylinder
Source: Copernicus journal article supplement (doi:10.5194/ms-10-517-2019), 2019-10-30
Supplement: Supplementary file [file ms-10-517-2019-supplement-title-page.pdf › ms-10-517-2019-supplement-title-page.pdf]

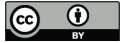

## *Supplement of*

# Effects of friction models on simulation of pneumatic cylinder

**Xuan Bo Tran et al.**

*Correspondence to:* Xuan Bo Tran (bo.tranxuan@hust.edu.vn)

- ms-10-517-2019-supplement-title-page.pdf
- Supplement file
  - Data set
    - \* Experimental data
    - \* Simulation data
  - Graphical abstract.doc
  - Highlights.doc

The copyright of individual parts of the supplement might differ from the CC BY 4.0 License.
