# Supplementary figures and images for: Effects of friction models on simulation of pneumatic cylinder
Source: Copernicus journal article supplement (doi:10.5194/ms-10-517-2019), 2019-10-30

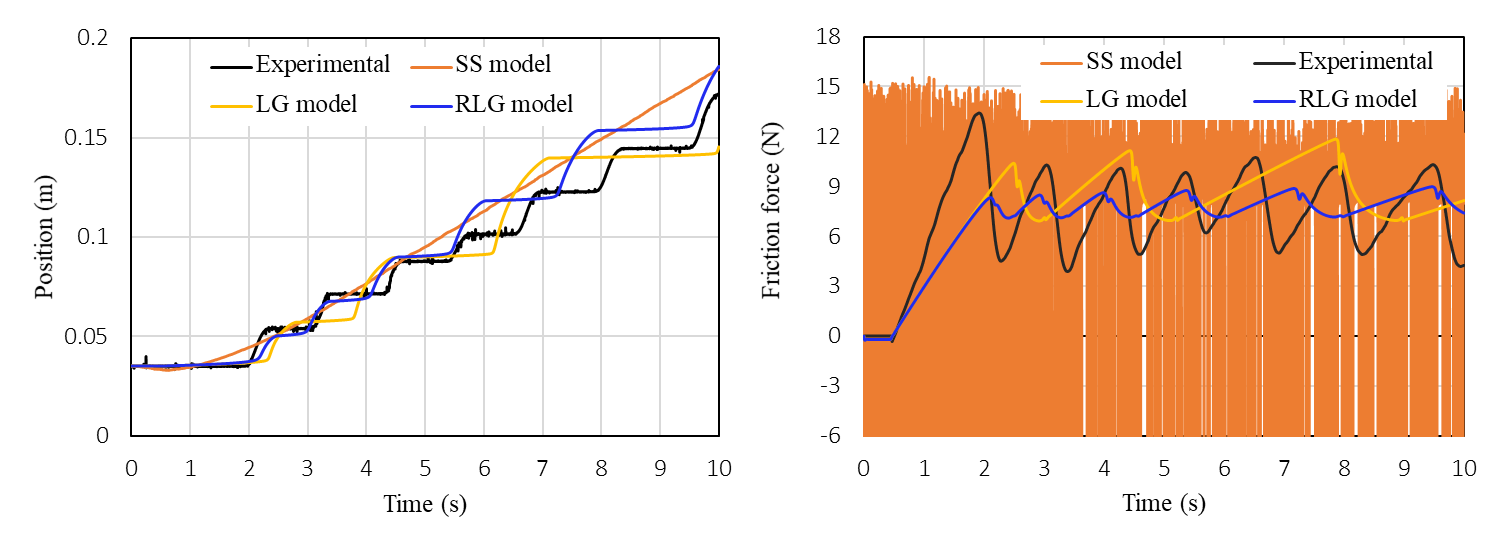

Supplement: Supplementary file 5 [file Graphical abstract.doc]
